# Supplementary material for: CAR+ and CAR- T cells differentiate into an NK-like subset that is associated with increased inflammatory cytokines following infusion
Source: medRxiv preprint, doi:10.1101/2022.03.29.22273013, version 1 (2022-04-02)
Supplement: Supplementary Table S5 [file 273013_file03.xlsx]

## Sheet: DGE canonical cell types
p_val	avg_logFC	pct.1	pct.2	p_val_adj	cluster	gene	sample
3.93721e-36	0.758476	0.268	0.02	7.87442e-33	Megakaryocytes	ZNF778	Patient 4_Preinfusion
1.00213e-39	0.340273	0.232	0.038	2.00427e-36	CD8 T	ZNF683	Patient 1_Day 13
1.99135e-64	0.365126	0.219	0.002	3.98271e-61	CD8 T	ZNF683	Patient 2_Preinfusion
4.81415e-149	0.547664	0.357	0.029	9.62829e-146	CD8 T	ZNF683	Patient 2_Day 31
3.63544e-78	0.453181	0.283	0.053	7.27087e-75	CD4 T	ZNF331	Patient 1_Preinfusion
4.34953e-23	0.294101	0.262	0.036	8.69905e-20	CD4 T	ZNF331	Patient 2_Preinfusion
3.12815e-08	0.247864	0.259	0.073	6.25629e-05	CD4 T	ZNF331	Patient 4_Day 8
1.02409e-54	0.274423	0.418	0.413	2.04818e-51	CD8 T	ZNF292	Healthy
9.039e-42	0.536238	0.425	0.366	1.8078e-38	CD8 T	ZNF292	Patient 1_Preinfusion
1.2116e-34	0.939714	0.3	0.281	2.4232e-31	CD8 T	ZNF292	Patient 1_Day 7
2.07559e-13	0.391086	0.512	0.275	4.15117e-10	CD4 T	ZNF292	Patient 2_Preinfusion
6.0232e-46	0.499123	0.498	0.264	1.20464e-42	CD8 T	ZNF292	Patient 2_Preinfusion
1.34999e-63	0.403662	0.435	0.357	2.69998e-60	CD8 T	ZNF292	Patient 2_Day 31
5.47914e-24	0.440629	0.239	0.205	1.09583e-20	CD8 T	ZNF292	Patient 3_Preinfusion
1.57049e-69	0.309318	0.286	0.185	3.14097e-66	CD8 T	ZNF292	Patient 3_Day 24
2.06894e-118	1.36069	0.359	0.269	4.13788e-115	CD8 T	ZNF292	Patient 4_Preinfusion
5.5709e-81	0.648724	0.416	0.396	1.11418e-77	CD8 T	ZNF292	Patient 4_Day 8
8.92949e-38	0.690916	0.456	0.389	1.7859e-34	CD8 T	ZNF292	Patient 3_Day 24 CAR T
5.64245e-56	0.304479	0.325	0.25	1.12849e-52	CD8 T	ZNF276	Healthy
6.08013e-08	0.328725	0.556	0.26	0.000121603	Gamma Delta T	ZNF276	Healthy
7.94109e-47	0.382995	0.501	0.25	1.58822e-43	NK	ZNF276	Healthy
1.12921e-65	0.232483	0.284	0.17	2.25842e-62	B cells	ZNF274	Healthy
1.50739e-105	1.11962	0.296	0.043	3.01478e-102	Megakaryocytes	ZNF185	Healthy
1.20955e-16	0.718922	0.346	0.01	2.41909e-13	Megakaryocytes	ZNF185	Patient 1_Day 7
2.59963e-20	1.31245	0.3	0.005	5.19925e-17	Megakaryocytes	ZNF185	Patient 4_Day 21
6.46157e-64	0.424207	0.391	0.267	1.29231e-60	CD4 T	ZMAT3	Patient 1_Preinfusion
1.27297e-19	0.282608	0.29	0.284	2.54593e-16	CD8 T	ZMAT3	Patient 1_Preinfusion
1.12763e-18	0.326111	0.404	0.275	2.25525e-15	CD8 T	ZMAT3	Patient 2_Preinfusion
8.24328e-09	0.613145	0.486	0.286	1.64866e-05	NK	ZMAT3	Patient 2_Preinfusion
6.64638e-41	0.330552	0.239	0.168	1.32928e-37	CD8 T	ZMAT3	Patient 3_Preinfusion
1.31105e-10	0.457839	0.377	0.172	2.6221e-07	Gamma Delta T	ZMAT3	Patient 3_Preinfusion
3.2158e-21	0.474356	0.336	0.171	6.4316e-18	NK	ZMAT3	Patient 3_Preinfusion
1.82226e-60	0.394672	0.236	0.213	3.64452e-57	CD8 T	ZMAT3	Patient 4_Preinfusion
2.42949e-30	0.234098	0.916	0.893	4.85898e-27	CD8 T	ZFP36L2	Healthy
7.59241e-117	0.579891	0.686	0.614	1.51848e-113	CD4 T	ZFP36L2	Patient 1_Preinfusion
1.98025e-59	0.6205	0.7	0.618	3.96051e-56	CD8 T	ZFP36L2	Patient 1_Preinfusion
1.68175e-121	0.960804	0.719	0.571	3.36349e-118	CD8 T	ZFP36L2	Patient 1_Day 7
1.7447e-18	0.248231	0.559	0.481	3.48941e-15	CD8 T	ZFP36L2	Patient 1_Day 13
4.50519e-14	0.399619	0.831	0.765	9.01038e-11	CD4 T	ZFP36L2	Patient 2_Preinfusion
2.31088e-56	0.366855	0.786	0.706	4.62177e-53	CD8 T	ZFP36L2	Patient 2_Day 31
1.07341e-77	0.209123	0.738	0.721	2.14681e-74	CD4 T	ZFP36L2	Patient 4_Preinfusion
1.10919e-69	0.40822	0.633	0.736	2.21838e-66	CD8 T	ZFP36L2	Patient 4_Preinfusion
2.98952e-28	0.761669	0.83	0.515	5.97903e-25	CD4 T	ZFP36L2	Patient 4_Day 8
3.72895e-118	0.886704	0.668	0.486	7.4579e-115	CD8 T	ZFP36L2	Patient 4_Day 8
6.28923e-07	0.662361	0.718	0.522	0.00125785	Gamma Delta T	ZFP36L2	Patient 4_Day 8
2.49067e-18	0.539535	0.673	0.517	4.98134e-15	NK	ZFP36L2	Patient 4_Day 8
3.72983e-13	0.223296	0.737	0.632	7.45966e-10	CD4 T	ZFP36L2	Patient 4_Day 21
2.11896e-20	0.203252	0.597	0.643	4.23792e-17	NK	ZFP36L2	Patient 4_Day 21
2.12088e-40	0.351617	0.709	0.533	4.24177e-37	CD4 T	ZFP36L2	Patient 3_Day 24 CAR T
0	0.621305	0.885	0.587	0	Monocytes	ZFP36L1	Healthy
4.49888e-84	0.319587	0.448	0.161	8.99776e-81	Monocytes	ZFP36L1	Patient 1_Preinfusion
4.40756e-100	0.735869	0.685	0.255	8.81512e-97	Monocytes	ZFP36L1	Patient 2_Preinfusion
1.70792e-167	0.674977	0.753	0.289	3.41583e-164	Monocytes	ZFP36L1	Patient 2_Day 31
3.6895e-291	0.472734	0.478	0.158	7.379e-288	Monocytes	ZFP36L1	Patient 3_Preinfusion
2.71312e-278	0.281249	0.348	0.092	5.42625e-275	Monocytes	ZFP36L1	Patient 3_Day 24
0	0.508722	0.552	0.136	0	Monocytes	ZFP36L1	Patient 4_Preinfusion
1.90687e-221	0.706396	0.719	0.184	3.81373e-218	Monocytes	ZFP36L1	Patient 4_Day 8
2.46988e-304	0.475285	0.559	0.122	4.93976e-301	Monocytes	ZFP36L1	Patient 4_Day 21
0	1.20994	0.989	0.613	0	Monocytes	ZFP36	Healthy
2.12887e-142	0.386241	0.609	0.213	4.25773e-139	Monocytes	ZFP36	Patient 1_Preinfusion
4.16865e-106	0.339872	0.471	0.691	8.3373e-103	CD8 T	ZFP36	Patient 1_Day 7
1.61493e-08	0.30286	0.44	0.296	3.22986e-05	Gamma Delta T	ZFP36	Patient 1_Day 13
2.45592e-51	0.413027	0.743	0.448	4.91183e-48	Monocytes	ZFP36	Patient 2_Preinfusion
1.964e-123	0.327769	0.633	0.23	3.928e-120	Monocytes	ZFP36	Patient 2_Day 31
3.32286e-297	0.454265	0.631	0.291	6.64571e-294	Monocytes	ZFP36	Patient 3_Preinfusion
1.89742e-267	0.215795	0.315	0.078	3.79484e-264	Monocytes	ZFP36	Patient 3_Day 24
1.5477e-279	0.30739	0.702	0.35	3.0954e-276	Monocytes	ZFP36	Patient 4_Preinfusion
6.94863e-180	0.211182	0.381	0.097	1.38973e-176	Monocytes	ZFP36	Patient 4_Day 21
2.24708e-39	0.390269	0.939	0.467	4.49417e-36	DC	ZEB2	Healthy
0	1.06378	0.949	0.245	0	Monocytes	ZEB2	Healthy
0	1.12729	0.958	0.251	0	Monocytes	ZEB2	Patient 1_Preinfusion
4.5205e-84	0.375345	0.526	0.764	9.041e-81	CD8 T	ZEB2	Patient 1_Day 7
9.61097e-118	0.600392	0.931	0.569	1.92219e-114	Monocytes	ZEB2	Patient 2_Preinfusion
4.76676e-59	0.250435	0.922	0.711	9.53352e-56	Monocytes	ZEB2	Patient 2_Day 31
0	0.841074	0.806	0.256	0	Monocytes	ZEB2	Patient 3_Preinfusion
0	0.423033	0.739	0.296	0	Monocytes	ZEB2	Patient 3_Day 24
0	1.04829	0.848	0.147	0	Monocytes	ZEB2	Patient 4_Preinfusion
7.34999e-162	0.234512	0.939	0.564	1.47e-158	Monocytes	ZEB2	Patient 4_Day 8
0	0.540622	0.897	0.392	0	Monocytes	ZEB2	Patient 4_Day 21
3.2476e-23	0.416728	0.275	0.216	6.49521e-20	CD8 T	ZEB2	Patient 3_Day 24 CAR T
6.49301e-68	0.221451	0.218	0.095	1.2986e-64	B cells	ZDHHC21	Healthy
1.24774e-06	0.903336	1	0.103	0.00249548	B cells	ZDHHC17	Patient 2_Day 31
3.27211e-07	0.47022	0.5	0.075	0.000654422	B cells	ZDHHC17	Patient 4_Day 21
5.45329e-61	0.253137	0.258	0.166	1.09066e-57	CD8 T	ZBTB38	Healthy
2.51365e-20	0.258249	0.232	0.094	5.02731e-17	CD8 T	ZBTB38	Patient 1_Preinfusion
6.6383e-37	0.42954	0.249	0.14	1.32766e-33	CD8 T	ZBTB38	Patient 1_Day 7
2.71329e-28	0.333841	0.26	0.082	5.42659e-25	CD8 T	ZBTB38	Patient 2_Preinfusion
1.44553e-84	0.39287	0.397	0.169	2.89105e-81	CD8 T	ZBTB38	Patient 2_Day 31
1.52936e-41	0.428786	0.227	0.097	3.05871e-38	CD8 T	ZBTB38	Patient 4_Day 8
1.02342e-77	0.293436	0.313	0.152	2.04684e-74	CD8 T	ZBTB38	Patient 4_Day 21
1.17999e-08	0.26584	0.326	0.207	2.35998e-05	Gamma Delta T	ZBTB38	Patient 4_Day 21
1.65311e-11	0.225253	0.277	0.253	3.30622e-08	CD8 T	ZBTB38	Patient 3_Day 24 CAR T
5.77653e-78	0.345664	0.47	0.329	1.15531e-74	B cells	ZBTB20	Healthy
2.34299e-88	0.275109	0.23	0.069	4.68598e-85	CD8 T	ZBTB16	Healthy
2.23305e-17	0.417709	0.469	0.092	4.4661e-14	Gamma Delta T	ZBTB16	Healthy
1.15986e-74	0.398043	0.378	0.08	2.31972e-71	NK	ZBTB16	Healthy
4.55498e-08	0.410499	0.216	0.034	9.10996e-05	NK	ZBTB16	Patient 2_Preinfusion
2.0866e-37	0.702458	0.333	0.229	4.1732e-34	CD8 T	ZBP1	Patient 1_Day 7
1.84707e-22	0.249603	0.229	0.076	3.69414e-19	CD8 T	ZBP1	Patient 2_Preinfusion
4.35363e-40	0.419615	0.232	0.066	8.70726e-37	CD8 T	ZBP1	Patient 4_Day 8
5.61483e-32	0.515911	0.44	0.085	1.12297e-28	NK	ZBP1	Patient 4_Day 8
7.97961e-149	0.561737	0.509	0.211	1.59592e-145	CD8 T	ZAP70	Healthy
6.09966e-16	0.530586	0.691	0.255	1.21993e-12	Gamma Delta T	ZAP70	Healthy
1.40871e-143	0.716229	0.738	0.233	2.81743e-140	NK	ZAP70	Healthy
5.17865e-55	0.412552	0.262	0.029	1.03573e-51	CD8 T	ZAP70	Patient 1_Preinfusion
6.22399e-47	0.551539	0.223	0.09	1.2448e-43	CD8 T	ZAP70	Patient 1_Day 7
5.14148e-27	0.240174	0.306	0.048	1.0283e-23	CD4 T	ZAP70	Patient 2_Preinfusion
1.39268e-84	0.532105	0.389	0.024	2.78536e-81	CD8 T	ZAP70	Patient 2_Preinfusion
5.53166e-10	0.6907	0.378	0.057	1.10633e-06	NK	ZAP70	Patient 2_Preinfusion
2.19973e-110	0.456366	0.414	0.097	4.39947e-107	CD8 T	ZAP70	Patient 2_Day 31
6.1302e-10	0.399757	0.559	0.268	1.22604e-06	NK	ZAP70	Patient 2_Day 31
1.35262e-115	0.225774	0.203	0.074	2.70523e-112	CD8 T	ZAP70	Patient 3_Day 24
1.0323e-92	0.681488	0.308	0.038	2.0646e-89	CD8 T	ZAP70	Patient 4_Day 8
6.88163e-25	0.387576	0.387	0.081	1.37633e-21	NK	ZAP70	Patient 4_Day 8
3.04122e-155	0.411199	0.399	0.106	6.08244e-152	CD8 T	ZAP70	Patient 4_Day 21
3.32229e-09	0.35511	0.383	0.208	6.64459e-06	Gamma Delta T	ZAP70	Patient 4_Day 21
1.75955e-27	0.37359	0.429	0.199	3.51911e-24	NK	ZAP70	Patient 4_Day 21
1.11474e-28	0.439077	0.404	0.346	2.22948e-25	CD8 T	ZAP70	Patient 3_Day 24 CAR T
1.01086e-72	0.358574	0.309	0.051	2.02172e-69	NK	YPEL1	Healthy
1.68366e-11	0.401821	0.324	0.022	3.36733e-08	NK	YPEL1	Patient 2_Preinfusion
2.74107e-10	0.515927	0.216	0.019	5.48215e-07	NK	YES1	Patient 2_Preinfusion
1.41416e-23	0.542085	0.274	0.043	2.82831e-20	NK	YES1	Patient 4_Day 8
1.73528e-40	0.247797	0.848	0.373	3.47055e-37	DC	YBX3	Healthy
0	0.554782	0.787	0.184	0	Monocytes	YBX3	Healthy
1.03818e-53	0.974866	0.504	0.379	2.07635e-50	Megakaryocytes	YBX3	Healthy
6.36217e-105	0.459015	0.455	0.367	1.27243e-101	B cells	YBX3	Healthy
2.01697e-25	0.218716	0.919	0.533	4.03393e-22	DC	YBX3	Patient 1_Preinfusion
4.59815e-59	0.454613	0.302	0.566	9.19631e-56	CD8 T	YBX3	Patient 1_Preinfusion
4.53647e-37	0.897935	0.526	0.545	9.07294e-34	Megakaryocytes	YBX3	Patient 1_Preinfusion
4.47161e-61	0.21392	0.434	0.092	8.94322e-58	Monocytes	YBX3	Patient 1_Day 13
7.99542e-78	0.532279	0.607	0.199	1.59908e-74	Monocytes	YBX3	Patient 2_Preinfusion
1.05507e-11	0.303285	0.814	0.307	2.11014e-08	DC	YBX3	Patient 2_Day 31
1.27384e-201	0.493404	0.648	0.144	2.54768e-198	Monocytes	YBX3	Patient 2_Day 31
3.38579e-152	0.283089	0.433	0.2	6.77158e-149	Monocytes	YBX3	Patient 3_Preinfusion
2.61357e-18	0.506695	0.32	0.372	5.22714e-15	Megakaryocytes	YBX3	Patient 3_Preinfusion
7.59673e-42	0.229226	0.633	0.165	1.51935e-38	DC	YBX3	Patient 3_Day 24
0	0.302746	0.384	0.089	0	Monocytes	YBX3	Patient 3_Day 24
0	0.466614	0.523	0.126	0	Monocytes	YBX3	Patient 4_Preinfusion
9.94247e-15	0.391555	0.317	0.353	1.98849e-11	Megakaryocytes	YBX3	Patient 4_Preinfusion
1.11419e-16	0.312284	0.897	0.507	2.22838e-13	DC	YBX3	Patient 4_Day 8
1.33906e-208	0.447173	0.693	0.174	2.67812e-205	Monocytes	YBX3	Patient 4_Day 8
2.03533e-39	0.89589	0.316	0.52	4.07065e-36	Megakaryocytes	YBX3	Patient 4_Day 8
7.76469e-14	0.208794	0.765	0.403	1.55294e-10	DC	YBX3	Patient 4_Day 21
0	0.637522	0.734	0.145	0	Monocytes	YBX3	Patient 4_Day 21
2.59686e-16	0.927762	0.35	0.409	5.19372e-13	Megakaryocytes	YBX3	Patient 4_Day 21
3.16124e-21	0.221976	0.245	0.142	6.32248e-18	CD4 T	YBX3	Patient 3_Day 24 CAR T
6.22687e-13	0.753515	0.231	0	1.24537e-09	Megakaryocytes	XK	Patient 1_Day 7
3.03957e-11	0.733348	0.333	0	6.07914e-08	Megakaryocytes	XK	Patient 2_Day 31
4.14606e-25	1.00141	0.24	0.001	8.29213e-22	Megakaryocytes	XK	Patient 3_Preinfusion
4.61815e-32	0.443072	0.457	0.037	9.2363e-29	Gamma Delta T	XCL2	Healthy
1.66384e-243	0.800456	0.478	0.018	3.32768e-240	NK	XCL2	Healthy
6.01897e-23	0.34712	0.216	0.01	1.20379e-19	NK	XCL2	Patient 2_Day 31
1.64119e-27	0.618408	0.227	0.003	3.28239e-24	NK	XCL2	Patient 4_Preinfusion
2.92442e-77	0.691003	0.304	0.046	5.84885e-74	NK	XCL2	Patient 4_Day 21
5.71943e-07	0.372276	0.224	0.047	0.00114389	Gamma Delta T	XCL2	Patient 1_Product
5.97255e-07	0.753772	0.231	0.062	0.00119451	NK	XCL2	Patient 4_Product
9.53146e-30	0.508815	0.444	0.039	1.90629e-26	Gamma Delta T	XCL1	Healthy
4.5057e-224	0.795488	0.467	0.02	9.0114e-221	NK	XCL1	Healthy
3.98124e-21	0.244915	0.951	0.632	7.96249e-18	DC	WSB1	Healthy
2.92759065301422e-311	0.302645	0.877	0.522	5.85518e-308	Monocytes	WSB1	Healthy
4.36382e-152	0.355666	0.653	0.242	8.72764e-149	Monocytes	WSB1	Patient 1_Preinfusion
1.56412e-299	0.273769	0.697	0.18	3.12824e-296	Monocytes	WSB1	Patient 1_Day 7
1.62186e-38	0.370654	0.62	0.34	3.24373e-35	Monocytes	WSB1	Patient 2_Preinfusion
1.79697e-138	0.458961	0.766	0.331	3.59393e-135	Monocytes	WSB1	Patient 2_Day 31
2.54956e-184	0.30887	0.445	0.19	5.09913e-181	Monocytes	WSB1	Patient 3_Preinfusion
1.02835e-265	0.331347	0.616	0.195	2.0567e-262	Monocytes	WSB1	Patient 4_Day 21
1.13082e-10	0.295875	0.25	0.236	2.26164e-07	CD8 T	WSB1	Patient 3_Day 24 CAR T
1.51282e-18	0.21709	0.202	0.187	3.02563e-15	CD8 T	VPS37B	Patient 1_Preinfusion
1.11471e-44	0.928484	0.297	0.174	2.22941e-41	CD8 T	VPS37B	Patient 1_Day 7
2.5932e-18	0.219478	0.251	0.154	5.1864e-15	CD8 T	VPS37B	Patient 2_Preinfusion
4.8447e-35	0.400402	0.22	0.161	9.68939e-32	CD8 T	VPS37B	Patient 4_Day 8
3.1053e-08	0.665353	0.25	0.132	6.21061e-05	Megakaryocytes	VPS37B	Patient 4_Day 21
1.68538e-11	0.271957	0.202	0.165	3.37076e-08	CD8 T	VPS37B	Patient 3_Day 24 CAR T
4.32612e-50	0.303903	0.23	0.128	8.65224e-47	CD8 T	VPS13A	Healthy
4.9155e-32	0.437773	0.235	0.091	9.83099e-29	CD8 T	VPS13A	Patient 1_Preinfusion
3.19771e-25	0.318793	0.226	0.056	6.39543e-22	CD8 T	VPS13A	Patient 2_Preinfusion
7.36676e-48	0.26297	0.234	0.095	1.47335e-44	CD8 T	VPS13A	Patient 2_Day 31
0	0.68832	0.931	0.417	0	Monocytes	VMP1	Healthy
7.18272e-143	0.412228	0.751	0.36	1.43654e-139	Monocytes	VMP1	Patient 1_Preinfusion
1.98747e-46	0.425765	0.7	0.407	3.97494e-43	Monocytes	VMP1	Patient 2_Preinfusion
5.29552e-198	0.629392	0.837	0.339	1.0591e-194	Monocytes	VMP1	Patient 2_Day 31
1.527e-150	0.283102	0.424	0.191	3.05401e-147	Monocytes	VMP1	Patient 3_Preinfusion
0	0.414699	0.532	0.156	0	Monocytes	VMP1	Patient 3_Day 24
1.00197560326111e-312	0.295374	0.561	0.199	0	Monocytes	VMP1	Patient 4_Preinfusion
1.71485e-61	0.207558	0.228	0.426	3.42969e-58	CD8 T	VMP1	Patient 4_Preinfusion
1.69013e-153	0.286975	0.773	0.328	3.38026e-150	Monocytes	VMP1	Patient 4_Day 8
0	0.641998	0.779	0.227	0	Monocytes	VMP1	Patient 4_Day 21
1.16649e-66	0.908428	1	0.925	2.33299e-63	DC	VIM	Healthy
0	0.916805	0.999	0.891	0	Monocytes	VIM	Healthy
4.34991e-14	0.336265	1	0.967	8.69981e-11	DC	VIM	Patient 1_Preinfusion
4.62909e-116	0.299643	0.998	0.889	9.25818e-113	Monocytes	VIM	Patient 1_Preinfusion
4.48082e-26	0.819823	1	0.731	8.96165e-23	DC	VIM	Patient 1_Day 7
0	1.20744	0.982	0.664	0	Monocytes	VIM	Patient 1_Day 7
3.42774e-17	1.19174	1	0.391	6.85549e-14	DC	VIM	Patient 1_Day 13
2.30541e-179	0.960177	0.942	0.324	4.61081e-176	Monocytes	VIM	Patient 1_Day 13
1.53804e-11	0.433902	1	0.979	3.07607e-08	DC	VIM	Patient 2_Preinfusion
1.00965e-121	0.446198	0.997	0.905	2.01931e-118	Monocytes	VIM	Patient 2_Preinfusion
4.38679e-08	0.394567	0.647	0.148	8.77357e-05	Monocytes	VIM	Patient 2_Day 24
4.29049e-26	1.10078	0.977	0.852	8.58097e-23	DC	VIM	Patient 2_Day 31
4.58237193121456e-313	0.885169	0.989	0.785	9.16474386242912e-310	Monocytes	VIM	Patient 2_Day 31
2.43162e-09	0.276384	0.968	0.848	4.86324e-06	CD4 T	VIM	Patient 2_Day 31
1.45221e-75	0.353576	1	0.936	2.90442e-72	DC	VIM	Patient 3_Preinfusion
0	0.521889	0.989	0.802	0	Monocytes	VIM	Patient 3_Preinfusion
4.42324e-63	0.849831	0.993	0.679	8.84648e-60	DC	VIM	Patient 3_Day 24
0	0.776359	0.945	0.582	0	Monocytes	VIM	Patient 3_Day 24
1.94592e-52	0.414435	0.997	0.926	3.89184e-49	DC	VIM	Patient 4_Preinfusion
0	0.44418	0.989	0.847	0	Monocytes	VIM	Patient 4_Preinfusion
5.76495e-11	0.335824	1	0.938	1.15299e-07	DC	VIM	Patient 4_Day 8
0	0.920565	0.998	0.825	0	Monocytes	VIM	Patient 4_Day 8
2.61861e-28	0.773486	1	0.889	5.23721e-25	DC	VIM	Patient 4_Day 21
0	0.99523	0.998	0.804	0	Monocytes	VIM	Patient 4_Day 21
2.42782e-11	0.28928	0.949	0.925	4.85563e-08	CD8 T	VIM	Patient 1_Product
7.26255e-18	0.388585	1	0.84	1.45251e-14	DC	VIM	Patient 3_Day 24 CAR T
5.31112e-64	0.318115	0.99	0.833	1.06222e-60	Monocytes	VIM	Patient 3_Day 24 CAR T
1.64856e-18	0.29068	0.967	0.943	3.29711e-15	CD8 T	VIM	Patient 4_Product
2.20434e-49	0.808744	0.243	0.003	4.40869e-46	Megakaryocytes	VIL1	Healthy
4.33229e-06	0.68718	0.222	0	0.00866458	Megakaryocytes	VEPH1	Patient 2_Preinfusion
2.75446e-18	1.46454	0.35	0	5.50892e-15	Megakaryocytes	VEPH1	Patient 4_Day 21
0	2.35428	0.93	0.089	0	Monocytes	VCAN	Healthy
0	2.1103	0.954	0.135	0	Monocytes	VCAN	Patient 1_Preinfusion
0	2.10243	0.906	0.022	0	Monocytes	VCAN	Patient 1_Day 7
5.10266e-09	0.209269	0.611	0.107	1.02053e-05	DC	VCAN	Patient 1_Day 13
4.87543979316142e-320	1.06642	0.861	0.013	9.75087958632284e-317	Monocytes	VCAN	Patient 1_Day 13
0	2.07916	0.936	0.121	0	Monocytes	VCAN	Patient 2_Preinfusion
0	2.31238	0.804	0.02	0	Monocytes	VCAN	Patient 2_Day 31
0	1.82979	0.958	0.16	0	Monocytes	VCAN	Patient 3_Preinfusion
0	1.31246	0.602	0.014	0	Monocytes	VCAN	Patient 3_Day 24
0	1.90119	0.948	0.059	0	Monocytes	VCAN	Patient 4_Preinfusion
0	2.20898	0.921	0.128	0	Monocytes	VCAN	Patient 4_Day 8
0	1.86457	0.656	0.024	0	Monocytes	VCAN	Patient 4_Day 21
7.34522e-35	0.246365	0.296	0.101	1.46904e-31	NK	USP28	Healthy
3.16456e-27	0.281075	0.216	0.048	6.32912e-24	CD8 T	USP28	Patient 2_Preinfusion
5.98537e-100	0.425553	0.347	0.087	1.19707e-96	CD8 T	USP28	Patient 2_Day 31
3.34632e-83	0.280148	0.265	0.09	6.69263e-80	CD8 T	USP28	Patient 4_Day 21
1.44395e-06	1.37473	0.286	0.223	0.00288791	B cells	USP28	Patient 3_Day 24 CAR T
1.88278e-17	0.250606	0.235	0.168	3.76557e-14	CD8 T	UHRF2	Patient 1_Preinfusion
2.43714e-28	0.61936	0.216	0.151	4.87428e-25	CD8 T	UHRF2	Patient 1_Day 7
4.36951e-08	0.20645	0.294	0.121	8.73902e-05	CD4 T	UHRF2	Patient 2_Preinfusion
3.6815e-18	0.260098	0.254	0.116	7.363e-15	CD8 T	UHRF2	Patient 2_Preinfusion
8.52169e-39	0.451769	0.243	0.153	1.70434e-35	CD8 T	UHRF2	Patient 4_Day 8
1.88876e-11	0.302438	0.204	0.174	3.77752e-08	CD8 T	UHRF2	Patient 3_Day 24 CAR T
1.10091e-06	0.21433	0.336	0.171	0.00220181	CD8 T	UBE2C	Patient 3_Product
4.30595e-100	0.72126	0.275	0.011	8.6119e-97	CD8 T	TYMS	Patient 1_Preinfusion
5.47722e-56	0.650026	0.204	0.006	1.09544e-52	CD8 T	TYMS	Patient 2_Preinfusion
2.90921e-225	0.444347	0.283	0.006	5.81843e-222	CD8 T	TYMS	Patient 3_Preinfusion
4.32103e-19	0.51245	0.642	0.436	8.64207e-16	CD8 T	TYMS	Patient 1_Product
9.10468e-13	0.299328	0.547	0.424	1.82094e-09	CD8 T	TYMS	Patient 4_Product
1.26151e-08	0.552285	0.478	0.48	2.52302e-05	CD8 T	TYMS	Patient 4_Day 8 CAR T
3.13477e-42	0.445899	0.963	0.472	6.26954e-39	DC	TYMP	Healthy
0	1.65983	0.984	0.237	0	Monocytes	TYMP	Healthy
9.45327e-14	0.22068	1	0.84	1.89065e-10	DC	TYMP	Patient 1_Preinfusion
0	1.44872	0.997	0.446	0	Monocytes	TYMP	Patient 1_Preinfusion
1.86352e-31	0.98157	1	0.43	3.72704e-28	DC	TYMP	Patient 1_Day 7
0	1.92521	0.984	0.283	0	Monocytes	TYMP	Patient 1_Day 7
3.10598e-10	0.704245	0.944	0.219	6.21197e-07	DC	TYMP	Patient 1_Day 13
0	1.39042	0.971	0.127	0	Monocytes	TYMP	Patient 1_Day 13
0	1.47478	0.988	0.454	0	Monocytes	TYMP	Patient 2_Preinfusion
7.77682e-15	0.832677	0.824	0.142	1.55536e-11	Monocytes	TYMP	Patient 2_Day 24
1.17997e-10	0.299536	0.953	0.496	2.35993e-07	DC	TYMP	Patient 2_Day 31
0	1.78296	0.98	0.26	0	Monocytes	TYMP	Patient 2_Day 31
0	0.976806	0.884	0.275	0	Monocytes	TYMP	Patient 3_Preinfusion
1.01305e-54	0.319738	0.893	0.308	2.0261e-51	DC	TYMP	Patient 3_Day 24
0	0.934831	0.834	0.117	0	Monocytes	TYMP	Patient 3_Day 24
0	1.23542	0.959	0.294	0	Monocytes	TYMP	Patient 4_Preinfusion
3.92122e-14	0.239029	1	0.741	7.84243e-11	DC	TYMP	Patient 4_Day 8
0	1.22034	0.975	0.303	0	Monocytes	TYMP	Patient 4_Day 8
5.7863e-21	0.387604	0.99	0.587	1.15726e-17	DC	TYMP	Patient 4_Day 21
0	1.65469	0.994	0.268	0	Monocytes	TYMP	Patient 4_Day 21
4.93397e-10	0.259309	0.5	0.088	9.86794e-07	Monocytes	TYMP	Patient 2_Product
3.73163e-42	0.273769	0.984	0.98	7.46325e-39	B cells	TXNIP	Healthy
1.58208e-139	0.594754	0.999	0.969	3.16416e-136	CD4 T	TXNIP	Patient 1_Preinfusion
2.10392e-32	0.450016	0.977	0.905	4.20784e-29	CD4 T	TXNIP	Patient 1_Day 7
3.68185e-70	0.384301	0.886	0.946	7.36371e-67	CD8 T	TXNIP	Patient 1_Day 7
3.22631e-25	0.476997	0.988	0.964	6.45261e-22	CD4 T	TXNIP	Patient 2_Preinfusion
3.41944e-11	0.222646	0.95	0.967	6.83888e-08	CD8 T	TXNIP	Patient 2_Preinfusion
1.23719e-73	0.325352	0.888	0.848	2.47439e-70	CD4 T	TXNIP	Patient 3_Preinfusion
2.34678e-13	0.304076	0.738	0.854	4.69357e-10	NK	TXNIP	Patient 3_Preinfusion
3.72035e-203	0.265861	0.925	0.735	7.44071e-200	Monocytes	TXNIP	Patient 3_Day 24
7.21569e-43	0.21441	0.922	0.776	1.44314e-39	CD4 T	TXNIP	Patient 3_Day 24
3.76084e-15	0.286714	0.849	0.785	7.52167e-12	Gamma Delta T	TXNIP	Patient 3_Day 24
3.35596e-65	0.405121	0.837	0.784	6.71192e-62	NK	TXNIP	Patient 3_Day 24
0	0.73349	0.977	0.907	0	CD4 T	TXNIP	Patient 4_Preinfusion
7.77514e-08	0.462664	0.867	0.926	0.000155503	NK	TXNIP	Patient 4_Preinfusion
2.51933e-22	0.644791	0.973	0.889	5.03866e-19	CD4 T	TXNIP	Patient 4_Day 8
2.37202e-168	0.349409	0.994	0.91	4.74405e-165	Monocytes	TXNIP	Patient 4_Day 21
7.03702e-10	0.389928	0.981	0.887	1.4074e-06	CD4 T	TXNIP	Patient 1_Product
2.88589e-09	0.607556	0.882	0.771	5.77178e-06	CD4 T	TXNIP	Patient 3_Product
3.85594e-123	0.710018	0.884	0.688	7.71189e-120	CD4 T	TXNIP	Patient 3_Day 24 CAR T
8.64848e-09	0.312469	0.927	0.862	1.7297e-05	CD4 T	TXNIP	Patient 4_Product
1.88646e-161	0.275931	0.367	0.128	3.77291e-158	CD4 T	TXK	Healthy
8.12685e-16	0.471787	0.617	0.193	1.62537e-12	Gamma Delta T	TXK	Healthy
1.38687e-151	0.719928	0.676	0.171	2.77375e-148	NK	TXK	Healthy
4.52045e-14	0.309654	0.293	0.034	9.0409e-11	NK	TXK	Patient 1_Day 13
8.02686e-35	1.08573	0.568	0.006	1.60537e-31	NK	TXK	Patient 2_Preinfusion
3.3907e-78	0.735752	0.627	0.015	6.7814e-75	NK	TXK	Patient 2_Day 31
1.47663e-76	0.343012	0.202	0.04	2.95326e-73	NK	TXK	Patient 3_Day 24
1.83078e-79	0.866326	0.506	0.021	3.66157e-76	NK	TXK	Patient 4_Day 8
2.09887e-13	0.297997	0.211	0.045	4.19775e-10	Gamma Delta T	TXK	Patient 4_Day 21
6.85307e-120	0.694573	0.405	0.027	1.37061e-116	NK	TXK	Patient 4_Day 21
4.16655e-40	0.260657	0.366	0.295	8.33309e-37	CD8 T	TUT4	Healthy
1.61796e-76	0.434531	0.442	0.246	3.23592e-73	CD4 T	TUT4	Patient 1_Preinfusion
1.24872e-35	0.543608	0.438	0.26	2.49743e-32	CD8 T	TUT4	Patient 1_Preinfusion
8.89897e-34	0.791995	0.285	0.213	1.77979e-30	CD8 T	TUT4	Patient 1_Day 7
3.17615e-19	0.388331	0.438	0.15	6.35231e-16	CD4 T	TUT4	Patient 2_Preinfusion
1.34756e-23	0.30654	0.354	0.143	2.69512e-20	CD8 T	TUT4	Patient 2_Preinfusion
1.30817e-69	0.42933	0.414	0.203	2.61633e-66	CD8 T	TUT4	Patient 2_Day 31
1.02001e-52	0.234245	0.223	0.14	2.04002e-49	CD8 T	TUT4	Patient 3_Day 24
2.12693e-69	0.96702	0.265	0.142	4.25386e-66	CD8 T	TUT4	Patient 4_Preinfusion
2.02211e-60	0.693827	0.349	0.18	4.04421e-57	CD8 T	TUT4	Patient 4_Day 8
3.61865e-08	0.338378	0.363	0.208	7.2373e-05	NK	TUT4	Patient 4_Day 8
4.72248e-57	0.289563	0.347	0.218	9.44497e-54	CD8 T	TUT4	Patient 4_Day 21
6.47924e-15	0.404739	0.353	0.33	1.29585e-11	CD8 T	TUT4	Patient 3_Day 24 CAR T
6.2663e-51	0.476537	0.296	0.436	1.25326e-47	Megakaryocytes	TUBB	Healthy
3.39742e-119	0.693087	0.342	0.34	6.79484e-116	CD8 T	TUBB	Patient 1_Preinfusion
2.32563e-12	0.22888	0.158	0.343	4.65125e-09	Megakaryocytes	TUBB	Patient 1_Preinfusion
1.61554e-55	0.428069	0.326	0.432	3.23108e-52	CD8 T	TUBB	Patient 2_Preinfusion
1.35996e-65	0.328019	0.303	0.211	2.71992e-62	CD8 T	TUBB	Patient 3_Preinfusion
5.92142e-30	0.655597	0.184	0.361	1.18428e-26	Megakaryocytes	TUBB	Patient 4_Day 8
9.2089e-11	0.654895	0.3	0.449	1.84178e-07	Megakaryocytes	TUBB	Patient 4_Day 21
9.00008e-26	0.741066	0.683	0.51	1.80002e-22	CD8 T	TUBB	Patient 1_Product
1.62254e-14	0.375356	0.372	0.196	3.24507e-11	CD8 T	TUBB	Patient 2_Product
1.77519e-11	0.460605	0.714	0.611	3.55039e-08	CD8 T	TUBB	Patient 3_Product
2.18447e-30	0.225596	0.322	0.283	4.36895e-27	CD8 T	TUBB	Patient 3_Day 24 CAR T
6.17069e-26	0.573652	0.636	0.476	1.23414e-22	CD8 T	TUBB	Patient 4_Product
0	3.11652	0.948	0.434	0	Megakaryocytes	TUBA4A	Healthy
4.11021e-18	0.302347	0.392	0.241	8.22041e-15	CD8 T	TUBA4A	Patient 1_Preinfusion
4.42806e-216	2.44458	0.789	0.247	8.85613e-213	Megakaryocytes	TUBA4A	Patient 1_Preinfusion
1.69467e-42	0.308294	0.357	0.272	3.38933e-39	CD8 T	TUBA4A	Patient 1_Day 7
2.89618e-39	1.66619	0.769	0.324	5.79235e-36	Megakaryocytes	TUBA4A	Patient 1_Day 7
5.79935e-15	1.42707	0.5	0.189	1.15987e-11	Megakaryocytes	TUBA4A	Patient 1_Day 13
3.42218e-07	0.228582	0.4	0.221	0.000684436	CD4 T	TUBA4A	Patient 2_Preinfusion
2.43433e-48	0.520423	0.502	0.2	4.86866e-45	CD8 T	TUBA4A	Patient 2_Preinfusion
3.95675e-59	2.79154	1	0.228	7.91349e-56	Megakaryocytes	TUBA4A	Patient 2_Preinfusion
4.45068e-116	2.9847	1	0.361	8.90136e-113	Megakaryocytes	TUBA4A	Patient 2_Day 31
0	3.52414	0.92	0.146	0	Megakaryocytes	TUBA4A	Patient 3_Preinfusion
1.53932e-26	1.67293	0.65	0.151	3.07864e-23	Megakaryocytes	TUBA4A	Patient 3_Day 24
3.02466e-19	0.252732	0.32	0.229	6.04931e-16	CD8 T	TUBA4A	Patient 4_Preinfusion
2.28562e-208	2.01678	0.841	0.234	4.57124e-205	Megakaryocytes	TUBA4A	Patient 4_Preinfusion
9.76073e-53	0.41025	0.471	0.247	1.95215e-49	CD8 T	TUBA4A	Patient 4_Day 8
3.42619e-144	3.01972	0.921	0.288	6.85239e-141	Megakaryocytes	TUBA4A	Patient 4_Day 8
5.45508e-200	3.38763	0.9	0.328	1.09102e-196	Megakaryocytes	TUBA4A	Patient 4_Day 21
9.31774e-40	0.630592	0.957	0.667	1.86355e-36	DC	TUBA1B	Healthy
2.12515e-140	1.33861	0.748	0.671	4.25031e-137	Megakaryocytes	TUBA1B	Healthy
2.51073e-43	0.610658	0.988	0.61	5.02147e-40	DC	TUBA1B	Patient 1_Preinfusion
2.97959e-116	0.752358	0.472	0.635	5.95919e-113	CD8 T	TUBA1B	Patient 1_Preinfusion
9.90907e-68	1.47953	0.737	0.621	1.98181e-64	Megakaryocytes	TUBA1B	Patient 1_Preinfusion
9.75297e-40	0.881681	1	0.332	1.95059e-36	DC	TUBA1B	Patient 1_Day 7
1.02245e-289	0.385924	0.748	0.225	2.0449e-286	Monocytes	TUBA1B	Patient 1_Day 7
6.15175e-07	0.817143	0.538	0.338	0.00123035	Megakaryocytes	TUBA1B	Patient 1_Day 7
1.37658e-09	0.21567	0.944	0.286	2.75316e-06	DC	TUBA1B	Patient 1_Day 13
3.8988e-21	0.646097	0.964	0.684	7.7976e-18	DC	TUBA1B	Patient 2_Preinfusion
7.37251e-30	0.599783	0.589	0.702	1.4745e-26	CD8 T	TUBA1B	Patient 2_Preinfusion
2.16491e-12	0.543375	1	0.625	4.32981e-09	DC	TUBA1B	Patient 2_Day 31
1.92337e-38	0.244184	0.774	0.556	3.84673e-35	Monocytes	TUBA1B	Patient 2_Day 31
3.16807e-197	0.492349	0.939	0.383	6.33613e-194	DC	TUBA1B	Patient 3_Preinfusion
2.49082e-243	0.655296	0.437	0.413	4.98165e-240	CD8 T	TUBA1B	Patient 3_Preinfusion
6.22651e-87	1.69892	0.7	0.414	1.2453e-83	Megakaryocytes	TUBA1B	Patient 3_Preinfusion
1.42496e-50	0.311834	0.88	0.304	2.84992e-47	DC	TUBA1B	Patient 3_Day 24
1.29401e-136	0.673689	0.959	0.361	2.58801e-133	DC	TUBA1B	Patient 4_Preinfusion
1.79488e-129	0.297237	0.285	0.392	3.58976e-126	CD8 T	TUBA1B	Patient 4_Preinfusion
2.19967e-29	0.653173	0.463	0.381	4.39934e-26	Megakaryocytes	TUBA1B	Patient 4_Preinfusion
8.39825e-25	0.49317	0.981	0.572	1.67965e-21	DC	TUBA1B	Patient 4_Day 8
1.69957e-49	1.54551	0.632	0.583	3.39914e-46	Megakaryocytes	TUBA1B	Patient 4_Day 8
1.16346e-23	0.498343	0.99	0.591	2.32692e-20	DC	TUBA1B	Patient 4_Day 21
7.17032e-18	1.48364	0.8	0.597	1.43406e-14	Megakaryocytes	TUBA1B	Patient 4_Day 21
3.51848e-29	0.760284	0.747	0.618	7.03696e-26	CD8 T	TUBA1B	Patient 1_Product
3.84298e-15	0.379155	0.409	0.231	7.68597e-12	CD8 T	TUBA1B	Patient 2_Product
9.72698e-10	0.41014	0.693	0.564	1.9454e-06	CD8 T	TUBA1B	Patient 3_Product
1.6488e-67	0.477206	0.354	0.327	3.2976e-64	CD8 T	TUBA1B	Patient 3_Day 24 CAR T
1.86935e-27	0.510135	0.681	0.556	3.7387e-24	CD8 T	TUBA1B	Patient 4_Product
1.42641e-17	0.217645	0.963	0.694	2.85281e-14	DC	TUBA1A	Healthy
5.48854e-190	0.269359	0.877	0.612	1.09771e-186	Monocytes	TUBA1A	Healthy
7.54376e-21	0.373633	0.941	0.393	1.50875e-17	DC	TUBA1A	Patient 1_Day 7
0	0.683723	0.84	0.275	0	Monocytes	TUBA1A	Patient 1_Day 7
9.4933e-99	0.754471	0.892	0.598	1.89866e-95	Monocytes	TUBA1A	Patient 2_Preinfusion
7.87018e-131	0.621969	0.823	0.479	1.57404e-127	Monocytes	TUBA1A	Patient 2_Day 31
1.01944e-113	0.309008	0.613	0.412	2.03889e-110	Monocytes	TUBA1A	Patient 3_Preinfusion
8.20706e-303	0.352316	0.569	0.248	1.64141e-299	Monocytes	TUBA1A	Patient 3_Day 24
2.56855e-123	0.224046	0.638	0.403	5.1371e-120	Monocytes	TUBA1A	Patient 4_Preinfusion
3.7471e-178	0.595879	0.843	0.385	7.49419e-175	Monocytes	TUBA1A	Patient 4_Day 8
0	0.665922	0.903	0.446	0	Monocytes	TUBA1A	Patient 4_Day 21
4.49028e-22	0.738707	0.209	0.155	8.98056e-19	CD8 T	TTN	Patient 3_Day 24 CAR T
2.40841e-07	0.47422	0.333	0.007	0.000481682	Megakaryocytes	TTC7B	Patient 2_Day 31
2.87744e-26	0.523062	0.543	0.078	5.75488e-23	Gamma Delta T	TTC38	Healthy
7.8062372042917e-322	0.913392	0.651	0.052	1.56124744085834e-318	NK	TTC38	Healthy
3.64478e-28	0.226086	0.293	0.104	7.28955e-25	Gamma Delta T	TTC38	Patient 1_Day 7
7.15319e-08	0.249115	0.276	0.104	0.000143064	Gamma Delta T	TTC38	Patient 1_Day 13
5.75706e-12	0.594015	0.351	0.056	1.15141e-08	NK	TTC38	Patient 2_Preinfusion
4.22107e-39	0.206618	0.209	0.078	8.44214e-36	CD8 T	TTC38	Patient 2_Day 31
1.45343e-08	0.328153	0.353	0.146	2.90686e-05	NK	TTC38	Patient 2_Day 31
1.47539e-24	0.265249	0.21	0.054	2.95077e-21	Gamma Delta T	TTC38	Patient 3_Day 24
6.78493e-14	0.250232	0.226	0.054	1.35699e-10	NK	TTC38	Patient 4_Day 8
7.84748e-14	0.330361	0.263	0.086	1.5695e-10	Gamma Delta T	TTC38	Patient 4_Day 21
2.64017e-33	0.359669	0.235	0.082	5.28033e-30	NK	TTC38	Patient 4_Day 21
8.18029e-87	0.303846	0.214	0.017	1.63606e-83	CD8 T	TTC16	Patient 2_Day 31
2.0568e-71	0.247334	0.415	0.425	4.1136e-68	CD8 T	TTC14	Healthy
1.57787e-44	0.228511	0.372	0.35	3.15575e-41	CD4 T	TTC14	Patient 1_Preinfusion
1.32236e-31	0.479752	0.408	0.349	2.64471e-28	CD8 T	TTC14	Patient 1_Preinfusion
2.06003e-39	0.854386	0.356	0.334	4.12005e-36	CD8 T	TTC14	Patient 1_Day 7
1.20812e-48	0.50831	0.549	0.257	2.41624e-45	CD8 T	TTC14	Patient 2_Preinfusion
9.30291e-10	0.599366	0.568	0.283	1.86058e-06	NK	TTC14	Patient 2_Preinfusion
6.47548e-86	0.397072	0.515	0.402	1.2951e-82	CD8 T	TTC14	Patient 2_Day 31
3.10173e-25	0.305528	0.229	0.166	6.20346e-22	CD8 T	TTC14	Patient 3_Preinfusion
2.50635e-14	0.310027	0.213	0.17	5.0127e-11	NK	TTC14	Patient 3_Preinfusion
5.68757e-45	0.218015	0.286	0.207	1.13751e-41	CD8 T	TTC14	Patient 3_Day 24
1.14102e-56	0.49428	0.254	0.151	2.28205e-53	CD8 T	TTC14	Patient 4_Preinfusion
2.31024e-07	0.439715	0.267	0.16	0.000462048	NK	TTC14	Patient 4_Preinfusion
5.54149e-83	0.715133	0.416	0.3	1.1083e-79	CD8 T	TTC14	Patient 4_Day 8
9.0748e-08	0.304013	0.446	0.319	0.000181496	NK	TTC14	Patient 4_Day 8
3.59793e-64	0.260212	0.4	0.341	7.19586e-61	CD8 T	TTC14	Patient 4_Day 21
1.69602e-21	0.462864	0.42	0.388	3.39203e-18	CD8 T	TTC14	Patient 3_Day 24 CAR T
1.96656e-145	0.294118	0.627	0.358	3.93311e-142	CD4 T	TSTD1	Healthy
1.90618e-83	0.34169	0.608	0.403	3.81236e-80	B cells	TSTD1	Healthy
5.6979e-218	0.801704	0.635	0.189	1.13958e-214	CD4 T	TSTD1	Patient 1_Preinfusion
3.38325e-23	0.366285	0.455	0.237	6.76651e-20	CD8 T	TSTD1	Patient 1_Preinfusion
1.09912e-10	0.218259	0.105	0.256	2.19825e-07	Megakaryocytes	TSTD1	Patient 1_Preinfusion
7.35189e-10	0.202356	0.515	0.322	1.47038e-06	CD4 T	TSTD1	Patient 1_Day 7
3.97643e-50	0.648332	0.625	0.123	7.95286e-47	CD4 T	TSTD1	Patient 2_Preinfusion
1.68656e-59	0.529452	0.473	0.112	3.37313e-56	CD8 T	TSTD1	Patient 2_Preinfusion
2.07952e-11	0.655825	0.568	0.143	4.15905e-08	NK	TSTD1	Patient 2_Preinfusion
5.93467e-74	0.33722	0.431	0.244	1.18693e-70	CD8 T	TSTD1	Patient 2_Day 31
2.21523e-09	0.329082	0.647	0.342	4.43046e-06	NK	TSTD1	Patient 2_Day 31
2.13298e-182	0.430318	0.383	0.112	4.26596e-179	CD4 T	TSTD1	Patient 3_Preinfusion
3.44847e-36	0.306732	0.303	0.132	6.89694e-33	CD8 T	TSTD1	Patient 3_Preinfusion
2.67244e-06	0.320168	0.325	0.143	0.00534488	Gamma Delta T	TSTD1	Patient 3_Preinfusion
1.90686e-12	0.347386	0.27	0.143	3.81373e-09	NK	TSTD1	Patient 3_Preinfusion
4.69231e-70	0.259959	0.29	0.249	9.38462e-67	NK	TSTD1	Patient 3_Day 24
1.94102e-300	0.441238	0.445	0.142	3.88203e-297	CD4 T	TSTD1	Patient 4_Preinfusion
5.46767e-18	0.427307	0.616	0.221	1.09353e-14	CD4 T	TSTD1	Patient 4_Day 8
9.13899e-54	0.407126	0.394	0.19	1.8278e-50	CD8 T	TSTD1	Patient 4_Day 8
1.4931e-11	0.447351	0.132	0.234	2.98619e-08	Megakaryocytes	TSTD1	Patient 4_Day 8
9.67536e-29	0.552637	0.554	0.218	1.93507e-25	NK	TSTD1	Patient 4_Day 8
2.68986e-34	0.30483	0.59	0.308	5.37973e-31	CD4 T	TSTD1	Patient 4_Day 21
1.8591e-34	0.212991	0.41	0.284	3.71821e-31	CD8 T	TSTD1	Patient 4_Day 21
9.61986e-17	0.385615	0.486	0.325	1.92397e-13	Gamma Delta T	TSTD1	Patient 4_Day 21
1.52638e-38	0.415561	0.499	0.319	3.05277e-35	NK	TSTD1	Patient 4_Day 21
8.36524e-28	0.209864	0.481	0.442	1.67305e-24	CD4 T	TSTD1	Patient 3_Day 24 CAR T
4.98042e-79	0.243494	0.403	0.237	9.96083e-76	CD4 T	TSPYL2	Healthy
1.09179e-44	0.262632	0.351	0.272	2.18358e-41	CD8 T	TSPYL2	Healthy
2.94982e-82	0.47845	0.274	0.044	5.89964e-79	CD4 T	TSPYL2	Patient 1_Preinfusion
2.95177e-57	1.00555	0.247	0.098	5.90354e-54	CD8 T	TSPYL2	Patient 1_Day 7
8.29263e-55	0.663911	0.228	0.048	1.65853e-51	CD8 T	TSPYL2	Patient 4_Day 8
3.50643e-68	0.858498	0.304	0.114	7.01285e-65	Megakaryocytes	TSPOAP1-AS1	Healthy
3.43664e-21	0.206942	0.26	0.109	6.87327e-18	NK	TSPOAP1-AS1	Healthy
7.1839e-41	1.23738	0.281	0.013	1.43678e-37	Megakaryocytes	TSPOAP1-AS1	Patient 1_Preinfusion
1.46041e-11	1.11143	0.667	0.043	2.92082e-08	Megakaryocytes	TSPOAP1-AS1	Patient 2_Day 31
1.5549e-33	0.752192	0.268	0.014	3.1098e-30	Megakaryocytes	TSPOAP1-AS1	Patient 4_Preinfusion
5.79616e-31	1.40126	0.4	0.035	1.15923e-27	Megakaryocytes	TSPOAP1-AS1	Patient 4_Day 21
1.13963e-08	0.208654	0.222	0.038	2.27927e-05	Gamma Delta T	TSPOAP1	Healthy
0	1.16818	0.99	0.573	0	Monocytes	TSPO	Healthy
0	1.33097	0.999	0.659	0	Monocytes	TSPO	Patient 1_Preinfusion
1.87083e-14	0.390094	0.985	0.598	3.74165e-11	DC	TSPO	Patient 1_Day 7
0	1.62842	0.972	0.5	0	Monocytes	TSPO	Patient 1_Day 7
8.07358e-09	0.30928	1	0.405	1.61472e-05	DC	TSPO	Patient 1_Day 13
1.30525e-142	0.749206	0.91	0.343	2.61051e-139	Monocytes	TSPO	Patient 1_Day 13
0	1.04481	0.984	0.725	0	Monocytes	TSPO	Patient 2_Preinfusion
0	1.10335	0.982	0.628	0	Monocytes	TSPO	Patient 2_Day 31
0	0.894493	0.964	0.584	0	Monocytes	TSPO	Patient 3_Preinfusion
5.73356e-29	0.257557	0.98	0.591	1.14671e-25	DC	TSPO	Patient 3_Day 24
0	0.730704	0.906	0.477	0	Monocytes	TSPO	Patient 3_Day 24
0	0.980486	0.967	0.52	0	Monocytes	TSPO	Patient 4_Preinfusion
0	1.26292	0.996	0.634	0	Monocytes	TSPO	Patient 4_Day 8
0	1.17538	0.992	0.612	0	Monocytes	TSPO	Patient 4_Day 21
3.39368e-06	0.266664	0.618	0.225	0.00678736	Monocytes	TSPO	Patient 2_Product
3.05538e-299	2.40309	0.826	0.095	6.11076e-296	Megakaryocytes	TSPAN33	Healthy
1.29812e-142	0.302795	0.305	0.067	2.59624e-139	B cells	TSPAN33	Healthy
5.44857e-217	2.29611	0.632	0.119	1.08971e-213	Megakaryocytes	TSPAN33	Patient 1_Preinfusion
7.21245e-32	1.39311	0.538	0.026	1.44249e-28	Megakaryocytes	TSPAN33	Patient 1_Day 7
1.56934e-68	2.45892	0.778	0.077	3.13868e-65	Megakaryocytes	TSPAN33	Patient 2_Preinfusion
6.98978e-45	1.9584	1	0.024	1.39796e-41	Megakaryocytes	TSPAN33	Patient 2_Day 31
9.15459e-122	2.24051	0.6	0.024	1.83092e-118	Megakaryocytes	TSPAN33	Patient 3_Preinfusion
1.33016e-11	0.553356	0.3	0.005	2.66032e-08	Megakaryocytes	TSPAN33	Patient 3_Day 24
1.9795e-61	1.06525	0.39	0.031	3.959e-58	Megakaryocytes	TSPAN33	Patient 4_Preinfusion
2.06982e-96	2.63421	0.658	0.031	4.13965e-93	Megakaryocytes	TSPAN33	Patient 4_Day 8
1.92649e-77	2.61868	0.7	0.027	3.85298e-74	Megakaryocytes	TSPAN33	Patient 4_Day 21
4.80938e-44	0.319539	0.241	0.021	9.61875e-41	CD8 T	TSPAN2	Patient 2_Preinfusion
2.44909e-50	0.22865	0.219	0.051	4.89817e-47	CD8 T	TSPAN2	Patient 2_Day 31
2.57743e-07	0.803884	0.5	0.145	0.000515486	Megakaryocytes	TSPAN2	Patient 2_Day 31
5.2139e-48	1.08293	0.28	0.035	1.04278e-44	Megakaryocytes	TSPAN2	Patient 3_Preinfusion
8.5883e-07	0.369945	0.333	0.005	0.00171766	Megakaryocytes	TSPAN18	Patient 2_Day 31
2.93389e-293	0.38587	0.252	0.02	5.86778e-290	CD4 T	TSHZ2	Healthy
9.22134e-36	0.312877	0.232	0.001	1.84427e-32	CD4 T	TSHZ2	Patient 4_Day 8
1.70056e-56	0.842434	0.748	0.81	3.40113e-53	Megakaryocytes	TSC22D3	Healthy
1.84546e-88	0.382055	0.848	0.803	3.69091e-85	B cells	TSC22D3	Healthy
6.39306e-69	0.4473	0.687	0.645	1.27861e-65	CD4 T	TSC22D3	Patient 1_Preinfusion
8.82842e-34	1.04922	0.544	0.652	1.76568e-30	Megakaryocytes	TSC22D3	Patient 1_Preinfusion
1.11084e-83	0.803073	0.722	0.793	2.22169e-80	CD8 T	TSC22D3	Patient 1_Day 7
2.88615e-30	0.260834	0.397	0.325	5.77229e-27	CD8 T	TSC22D3	Patient 1_Day 13
2.27453e-06	0.877443	0.917	0.674	0.00454905	Megakaryocytes	TSC22D3	Patient 2_Day 31
8.92874e-08	0.368876	0.584	0.467	0.000178575	Gamma Delta T	TSC22D3	Patient 3_Preinfusion
6.69218e-29	0.78893	0.38	0.468	1.33844e-25	Megakaryocytes	TSC22D3	Patient 3_Preinfusion
7.23262e-81	0.234175	0.767	0.715	1.44652e-77	CD4 T	TSC22D3	Patient 4_Preinfusion
2.06309e-70	0.274578	0.57	0.747	4.12618e-67	CD8 T	TSC22D3	Patient 4_Preinfusion
4.74204e-09	0.207443	0.533	0.73	9.48408e-06	NK	TSC22D3	Patient 4_Preinfusion
4.54034e-06	0.253914	0.866	0.71	0.00908067	CD4 T	TSC22D3	Patient 4_Day 8
2.07335e-60	0.264565	0.57	0.753	4.14671e-57	CD8 T	TSC22D3	Patient 4_Day 8
1.34871e-29	0.869435	0.447	0.717	2.69743e-26	Megakaryocytes	TSC22D3	Patient 4_Day 8
3.55365e-28	1.44103	0.6	0.546	7.1073e-25	Megakaryocytes	TSC22D3	Patient 4_Day 21
1.73705e-36	0.358702	0.513	0.331	3.47409e-33	CD4 T	TSC22D3	Patient 3_Day 24 CAR T
9.19161e-305	2.97433	0.73	0.063	1.83832e-301	Megakaryocytes	TSC22D1	Healthy
1.46485e-166	3.38311	0.807	0.069	2.92969e-163	Megakaryocytes	TSC22D1	Patient 1_Preinfusion
7.00296e-48	2.75086	0.769	0.044	1.40059e-44	Megakaryocytes	TSC22D1	Patient 1_Day 7
2.52891e-07	1.20327	0.5	0.012	0.000505782	Megakaryocytes	TSC22D1	Patient 1_Day 13
3.09749e-66	4.23344	1	0.047	6.19498e-63	Megakaryocytes	TSC22D1	Patient 2_Preinfusion
3.89753e-88	3.71851	0.917	0.063	7.79505e-85	Megakaryocytes	TSC22D1	Patient 2_Day 31
8.24316e-178	3.48741	0.84	0.042	1.64863e-174	Megakaryocytes	TSC22D1	Patient 3_Preinfusion
1.08069e-22	1.62533	0.6	0.032	2.16139e-19	Megakaryocytes	TSC22D1	Patient 3_Day 24
4.2934e-221	3.09756	0.902	0.06	8.58679e-218	Megakaryocytes	TSC22D1	Patient 4_Preinfusion
4.20924e-76	2.99724	0.684	0.046	8.41847e-73	Megakaryocytes	TSC22D1	Patient 4_Day 8
6.18659e-119	3.96406	0.85	0.055	1.23732e-115	Megakaryocytes	TSC22D1	Patient 4_Day 21
1.14953e-69	1.0567	0.304	0.013	2.29907e-66	Megakaryocytes	TRIM58	Healthy
1.34703e-30	1.36718	0.351	0.03	2.69406e-27	Megakaryocytes	TRIM58	Patient 1_Preinfusion
8.15031e-18	0.980231	0.423	0.006	1.63006e-14	Megakaryocytes	TRIM58	Patient 1_Day 7
4.12484e-20	1.39626	0.667	0.044	8.24969e-17	Megakaryocytes	TRIM58	Patient 2_Preinfusion
2.47857e-15	1.06773	0.5	0.02	4.95714e-12	Megakaryocytes	TRIM58	Patient 2_Day 31
3.52186e-102	1.54526	0.36	0.044	7.04372e-99	Megakaryocytes	TRIM58	Patient 3_Preinfusion
2.73313e-11	0.961686	0.25	0.006	5.46626e-08	Megakaryocytes	TRIM58	Patient 3_Day 24
6.42017e-61	1.0724	0.378	0.02	1.28403e-57	Megakaryocytes	TRIM58	Patient 4_Preinfusion
4.82244e-40	1.54268	0.395	0.021	9.64487e-37	Megakaryocytes	TRIM58	Patient 4_Day 8
8.95942e-38	1.96665	0.4	0.008	1.79188e-34	Megakaryocytes	TRIM58	Patient 4_Day 21
7.71957e-109	0.295077	0.534	0.194	1.54391e-105	Monocytes	TRIM56	Patient 1_Preinfusion
5.73305e-63	0.341854	0.138	0.27	1.14661e-59	CD8 T	TRIM56	Patient 1_Day 7
1.19657e-194	0.483437	0.645	0.468	2.39314e-191	B cells	TRIM38	Healthy
1.30535e-110	0.313872	0.698	0.348	2.6107e-107	Monocytes	TRIM38	Patient 1_Preinfusion
1.35863e-106	0.205645	0.177	0.391	2.71726e-103	CD8 T	TRIM38	Patient 1_Day 7
2.8131e-18	0.232286	0.535	0.338	5.6262e-15	Monocytes	TRIM38	Patient 2_Preinfusion
1.87399e-101	0.235876	0.401	0.207	3.74798e-98	Monocytes	TRIM38	Patient 3_Preinfusion
4.94061e-234	0.218047	0.449	0.155	9.88121e-231	Monocytes	TRIM38	Patient 4_Preinfusion
8.57754e-109	0.216656	0.589	0.225	1.71551e-105	Monocytes	TRIM38	Patient 4_Day 8
9.90854e-246	0.277308	0.596	0.199	1.98171e-242	Monocytes	TRIM38	Patient 4_Day 21
3.24867e-12	0.286892	0.207	0.187	6.49734e-09	CD8 T	TRIM38	Patient 3_Day 24 CAR T
3.26291e-09	0.299331	0.214	0.192	6.52582e-06	NK	TRIM33	Patient 4_Day 8
1.5191e-56	0.260117	0.654	0.691	3.03819e-53	CD4 T	TRIM22	Patient 1_Preinfusion
5.50771e-32	0.40106	0.618	0.692	1.10154e-28	CD8 T	TRIM22	Patient 1_Preinfusion
1.17446e-111	0.399129	0.523	0.766	2.34892e-108	CD8 T	TRIM22	Patient 1_Day 7
1.34396e-35	0.437943	0.583	0.474	2.68792e-32	CD8 T	TRIM22	Patient 2_Preinfusion
3.08484e-10	0.622627	0.676	0.483	6.16968e-07	NK	TRIM22	Patient 2_Preinfusion
5.38305e-41	0.518742	0.372	0.348	1.07661e-37	CD8 T	TRIM22	Patient 3_Preinfusion
7.08544e-07	0.290118	0.416	0.349	0.00141709	Gamma Delta T	TRIM22	Patient 3_Preinfusion
1.62516e-18	0.352054	0.377	0.349	3.25031e-15	NK	TRIM22	Patient 3_Preinfusion
2.4099e-89	0.602556	0.409	0.434	4.81979e-86	CD8 T	TRIM22	Patient 4_Preinfusion
1.43044e-07	0.322423	0.431	0.432	0.000286088	Gamma Delta T	TRIM22	Patient 4_Preinfusion
1.00885e-13	0.500654	0.413	0.432	2.0177e-10	NK	TRIM22	Patient 4_Preinfusion
3.70183e-64	0.392121	0.315	0.398	7.40365e-61	CD8 T	TRIM22	Patient 4_Day 8
4.07116e-17	0.335763	0.392	0.352	8.14232e-14	CD8 T	TRIM22	Patient 3_Day 24 CAR T
0	1.08961	0.556	0.05	0	CD8 T	TRGC2	Healthy
1.59956e-15	0.413577	0.494	0.128	3.19911e-12	Gamma Delta T	TRGC2	Healthy
5.92586e-70	0.631772	0.23	0.011	1.18517e-66	CD8 T	TRGC2	Patient 1_Preinfusion
1.79321e-06	0.904352	0.462	0.027	0.00358642	Gamma Delta T	TRGC2	Patient 1_Preinfusion
1.38216e-115	0.610023	0.419	0.154	2.76433e-112	CD8 T	TRGC2	Patient 1_Day 7
9.69707e-37	0.209862	0.591	0.301	1.93941e-33	Gamma Delta T	TRGC2	Patient 1_Day 7
1.89798e-49	0.381917	0.461	0.163	3.79596e-46	CD8 T	TRGC2	Patient 1_Day 13
3.4304e-14	0.572558	0.69	0.379	6.8608e-11	Gamma Delta T	TRGC2	Patient 1_Day 13
1.20444e-170	0.964423	0.536	0.006	2.40888e-167	CD8 T	TRGC2	Patient 2_Preinfusion
2.99879e-239	0.860106	0.532	0.05	5.99759e-236	CD8 T	TRGC2	Patient 2_Day 31
3.35194e-158	0.377056	0.226	0.007	6.70388e-155	CD8 T	TRGC2	Patient 3_Preinfusion
2.17786e-15	0.36042	0.26	0.021	4.35572e-12	Gamma Delta T	TRGC2	Patient 3_Preinfusion
4.58678e-178	0.275825	0.229	0.065	9.17356e-175	CD8 T	TRGC2	Patient 3_Day 24
1.09821e-26	0.425574	0.335	0.152	2.19643e-23	Gamma Delta T	TRGC2	Patient 3_Day 24
1.27991e-171	0.917561	0.372	0.014	2.55983e-168	CD8 T	TRGC2	Patient 4_Day 8
0	1.03394	0.548	0.053	0	CD8 T	TRGC2	Patient 4_Day 21
7.17461e-16	0.567747	0.503	0.224	1.43492e-12	Gamma Delta T	TRGC2	Patient 4_Day 21
3.49812e-07	0.400779	0.514	0.334	0.000699625	Gamma Delta T	TRGC2	Patient 4_Product
5.88874e-172	0.547364	0.247	0.038	1.17775e-168	CD8 T	TRGC1	Healthy
4.06451e-26	0.533176	0.506	0.068	8.12902e-23	Gamma Delta T	TRGC1	Healthy
1.47108e-114	0.433522	0.4	0.054	2.94216e-111	NK	TRGC1	Healthy
4.43165e-09	0.872779	0.385	0.011	8.8633e-06	Gamma Delta T	TRGC1	Patient 1_Preinfusion
6.3132e-67	0.342203	0.489	0.141	1.26264e-63	Gamma Delta T	TRGC1	Patient 1_Day 7
1.68337e-20	0.643134	0.595	0.239	3.36673e-17	Gamma Delta T	TRGC1	Patient 1_Day 13
2.65613e-19	0.337153	0.284	0.027	5.31225e-16	NK	TRGC1	Patient 2_Day 31
2.53612e-38	0.623743	0.364	0.007	5.07223e-35	Gamma Delta T	TRGC1	Patient 3_Preinfusion
1.51088e-33	0.897377	0.385	0.014	3.02175e-30	Gamma Delta T	TRGC1	Patient 4_Preinfusion
5.26994e-69	0.317301	0.213	0.06	1.05399e-65	CD8 T	TRGC1	Patient 4_Day 21
3.99318e-32	0.960081	0.36	0.109	7.98636e-29	Gamma Delta T	TRGC1	Patient 4_Day 21
5.169e-34	0.298337	0.344	0.101	1.0338e-30	NK	TRGC1	Patient 4_Day 21
4.91868e-11	0.523696	0.385	0.201	9.83737e-08	Gamma Delta T	TRGC1	Patient 4_Product
8.30241e-112	0.342405	0.285	0.144	1.66048e-108	CD8 T	TRG-AS1	Healthy
1.27997e-23	0.22872	0.332	0.158	2.55994e-20	NK	TRG-AS1	Healthy
2.40663e-06	0.62786	0.308	0.055	0.00481326	Gamma Delta T	TRG-AS1	Patient 1_Preinfusion
1.24589e-34	0.340894	0.273	0.067	2.49179e-31	CD8 T	TRG-AS1	Patient 2_Preinfusion
5.75604e-88	0.429852	0.333	0.094	1.15121e-84	CD8 T	TRG-AS1	Patient 2_Day 31
3.79026e-82	0.488604	0.269	0.034	7.58052e-79	CD8 T	TRG-AS1	Patient 4_Day 8
1.81644e-10	0.250942	0.25	0.075	3.63288e-07	NK	TRG-AS1	Patient 4_Day 8
4.02939e-195	0.493632	0.368	0.066	8.05879e-192	CD8 T	TRG-AS1	Patient 4_Day 21
5.08761e-11	0.413758	0.36	0.17	1.01752e-07	Gamma Delta T	TRG-AS1	Patient 4_Day 21
5.41074e-58	1.37183	0.84	0.084	1.08215e-54	Gamma Delta T	TRDC	Healthy
0	1.61941	0.924	0.046	0	NK	TRDC	Healthy
8.13113e-155	1.0286	0.561	0.074	1.62623e-151	Gamma Delta T	TRDC	Patient 1_Day 7
1.25575e-27	0.854517	0.625	0.105	2.5115e-24	NK	TRDC	Patient 1_Day 7
3.31056e-39	0.997912	0.716	0.159	6.62112e-36	Gamma Delta T	TRDC	Patient 1_Day 13
1.89375e-25	0.666597	0.72	0.166	3.7875e-22	NK	TRDC	Patient 1_Day 13
2.77063e-42	1.47336	0.757	0.018	5.54127e-39	NK	TRDC	Patient 2_Preinfusion
1.27817e-06	0.743834	0.833	0.025	0.00255634	NK	TRDC	Patient 2_Day 24
5.63855e-92	1.22976	0.794	0.031	1.12771e-88	NK	TRDC	Patient 2_Day 31
2.7604e-60	1.17845	0.558	0.011	5.5208e-57	Gamma Delta T	TRDC	Patient 3_Preinfusion
1.6473e-55	0.748969	0.385	0.01	3.2946e-52	NK	TRDC	Patient 3_Preinfusion
9.4375e-128	0.870391	0.545	0.071	1.8875e-124	Gamma Delta T	TRDC	Patient 3_Day 24
1.63659e-204	0.734389	0.461	0.061	3.27317e-201	NK	TRDC	Patient 3_Day 24
4.29864e-45	1.1721	0.477	0.009	8.59729e-42	Gamma Delta T	TRDC	Patient 4_Preinfusion
3.57653e-42	0.88516	0.427	0.009	7.15306e-39	NK	TRDC	Patient 4_Preinfusion
1.08418e-13	0.971528	0.513	0.06	2.16835e-10	Gamma Delta T	TRDC	Patient 4_Day 8
6.5562e-128	1.37545	0.75	0.032	1.31124e-124	NK	TRDC	Patient 4_Day 8
7.65074e-38	1.00491	0.429	0.068	1.53015e-34	Gamma Delta T	TRDC	Patient 4_Day 21
3.15232e-292	1.4898	0.787	0.033	6.30465e-289	NK	TRDC	Patient 4_Day 21
5.39637e-07	0.951212	0.227	0.02	0.00107927	Gamma Delta T	TRBV3-1	Patient 4_Day 8 CAR T
0	0.882839	0.823	0.347	0	CD4 T	TRBC2	Healthy
1.41749e-180	0.581105	0.779	0.426	2.83497e-177	CD8 T	TRBC2	Healthy
2.69234260535931e-316	1.31364	0.706	0.064	5.38468521071862e-313	CD4 T	TRBC2	Patient 1_Preinfusion
4.311e-109	0.952429	0.62	0.117	8.622e-106	CD8 T	TRBC2	Patient 1_Preinfusion
3.18778e-233	0.685681	0.657	0.247	6.37556e-230	CD8 T	TRBC2	Patient 1_Day 7
7.26835e-63	0.530552	0.666	0.33	1.45367e-59	CD8 T	TRBC2	Patient 1_Day 13
3.24251e-76	1.12727	0.762	0.107	6.48502e-73	CD4 T	TRBC2	Patient 2_Preinfusion
1.45357e-262	1.68998	0.909	0.055	2.90713e-259	CD8 T	TRBC2	Patient 2_Preinfusion
4.8237e-12	0.225122	0.541	0.135	9.6474e-09	NK	TRBC2	Patient 2_Preinfusion
0	1.37548	0.887	0.169	0	CD8 T	TRBC2	Patient 2_Day 31
0	0.777218	0.472	0.045	0	CD4 T	TRBC2	Patient 3_Preinfusion
3.34568e-206	0.598413	0.477	0.067	6.69136e-203	CD8 T	TRBC2	Patient 3_Preinfusion
1.02185e-37	0.20265	0.518	0.319	2.0437e-34	CD4 T	TRBC2	Patient 3_Day 24
8.64141e-301	0.39866	0.458	0.176	1.72828e-297	CD8 T	TRBC2	Patient 3_Day 24
0	0.663449	0.508	0.081	0	CD4 T	TRBC2	Patient 4_Preinfusion
2.69843e-116	0.62854	0.491	0.165	5.39687e-113	CD8 T	TRBC2	Patient 4_Preinfusion
6.051e-27	0.74475	0.634	0.161	1.2102e-23	CD4 T	TRBC2	Patient 4_Day 8
4.93583e-199	1.15126	0.57	0.07	9.87167e-196	CD8 T	TRBC2	Patient 4_Day 8
8.63823e-08	0.516406	0.564	0.172	0.000172765	Gamma Delta T	TRBC2	Patient 4_Day 8
3.36431e-30	0.389829	0.542	0.158	6.72862e-27	NK	TRBC2	Patient 4_Day 8
2.59599e-69	0.60044	0.805	0.395	5.19197e-66	CD4 T	TRBC2	Patient 4_Day 21
0	1.07215	0.813	0.208	0	CD8 T	TRBC2	Patient 4_Day 21
1.49253e-15	0.373301	0.731	0.419	2.98506e-12	Gamma Delta T	TRBC2	Patient 4_Day 21
4.00228e-34	0.388806	0.665	0.572	8.00456e-31	CD4 T	TRBC2	Patient 3_Day 24 CAR T
0	0.931286	0.622	0.213	0	CD4 T	TRBC1	Healthy
4.0713e-89	0.463244	0.546	0.289	8.14261e-86	CD8 T	TRBC1	Healthy
3.30391e-14	0.440053	0.753	0.326	6.60782e-11	Gamma Delta T	TRBC1	Healthy
1.49324e-74	0.373538	0.706	0.31	2.98647e-71	NK	TRBC1	Healthy
1.19305e-168	1.08515	0.431	0.037	2.3861e-165	CD4 T	TRBC1	Patient 1_Preinfusion
1.71859e-50	0.824341	0.355	0.072	3.43717e-47	CD8 T	TRBC1	Patient 1_Preinfusion
1.66829e-68	0.469447	0.446	0.233	3.33658e-65	CD8 T	TRBC1	Patient 1_Day 7
1.61541e-54	0.404241	0.701	0.341	3.23083e-51	Gamma Delta T	TRBC1	Patient 1_Day 7
1.72565e-28	0.440791	0.498	0.299	3.4513e-25	CD8 T	TRBC1	Patient 1_Day 13
6.6391e-68	1.19687	0.556	0.043	1.32782e-64	CD4 T	TRBC1	Patient 2_Preinfusion
3.33648e-43	0.612287	0.304	0.043	6.67295e-40	CD8 T	TRBC1	Patient 2_Preinfusion
3.18329e-19	1.04788	0.649	0.062	6.36658e-16	NK	TRBC1	Patient 2_Preinfusion
1.41209e-20	0.66605	0.5	0.16	2.82418e-17	CD4 T	TRBC1	Patient 2_Day 31
8.64704e-20	0.385298	0.224	0.11	1.72941e-16	CD8 T	TRBC1	Patient 2_Day 31
1.09811e-27	0.638982	0.657	0.16	2.19621e-24	NK	TRBC1	Patient 2_Day 31
2.32783e-246	0.651603	0.359	0.041	4.65566e-243	CD4 T	TRBC1	Patient 3_Preinfusion
1.27818e-150	0.643415	0.384	0.056	2.55637e-147	CD8 T	TRBC1	Patient 3_Preinfusion
2.05804e-21	0.579606	0.494	0.076	4.11609e-18	Gamma Delta T	TRBC1	Patient 3_Preinfusion
8.78743e-16	0.604772	0.32	0.076	1.75749e-12	NK	TRBC1	Patient 3_Preinfusion
0	0.485888	0.482	0.188	0	CD8 T	TRBC1	Patient 3_Day 24
4.17128e-10	0.241717	0.506	0.349	8.34257e-07	Gamma Delta T	TRBC1	Patient 3_Day 24
0	0.675622	0.432	0.064	0	CD4 T	TRBC1	Patient 4_Preinfusion
1.02937e-70	0.5149	0.38	0.14	2.05875e-67	CD8 T	TRBC1	Patient 4_Preinfusion
5.02094e-31	0.79335	0.652	0.151	1.00419e-27	CD4 T	TRBC1	Patient 4_Day 8
2.30495e-179	1.26426	0.53	0.068	4.60991e-176	CD8 T	TRBC1	Patient 4_Day 8
1.63769e-09	0.748684	0.615	0.161	3.27538e-06	Gamma Delta T	TRBC1	Patient 4_Day 8
6.53613e-30	0.395883	0.518	0.149	1.30723e-26	NK	TRBC1	Patient 4_Day 8
2.68033e-43	0.605548	0.638	0.315	5.36066e-40	CD4 T	TRBC1	Patient 4_Day 21
2.67543e-295	0.983637	0.63	0.175	5.35087e-292	CD8 T	TRBC1	Patient 4_Day 21
1.65964e-10	0.301794	0.583	0.333	3.31928e-07	Gamma Delta T	TRBC1	Patient 4_Day 21
1.13255e-62	0.363061	0.596	0.433	2.26509e-59	CD8 T	TRBC1	Patient 3_Day 24 CAR T
0	0.466245	0.428	0.073	0	CD4 T	TRAT1	Healthy
2.99077e-25	0.207084	0.263	0.157	5.98154e-22	CD8 T	TRAT1	Healthy
1.1658e-173	0.656437	0.392	0.026	2.3316e-170	CD4 T	TRAT1	Patient 1_Preinfusion
1.1861e-39	0.286294	0.272	0.063	2.37219e-36	CD8 T	TRAT1	Patient 1_Preinfusion
3.19905e-21	0.227786	0.361	0.075	6.39811e-18	CD4 T	TRAT1	Patient 1_Day 13
5.00719e-53	0.415942	0.325	0.008	1.00144e-49	CD4 T	TRAT1	Patient 2_Preinfusion
2.31664e-47	0.531662	0.545	0.076	4.63329e-44	CD4 T	TRAT1	Patient 2_Day 31
1.11122e-275	0.29883	0.291	0.035	2.22243e-272	CD4 T	TRAT1	Patient 4_Preinfusion
2.63771e-37	0.439234	0.223	0.092	5.27542e-34	CD8 T	TRAT1	Patient 4_Preinfusion
1.97303e-24	0.291135	0.286	0.02	3.94606e-21	CD4 T	TRAT1	Patient 4_Day 8
8.60547e-121	0.551378	0.53	0.086	1.72109e-117	CD4 T	TRAT1	Patient 4_Day 21
1.0084e-07	0.329981	0.353	0.255	0.00020168	CD4 T	TRAT1	Patient 3_Product
2.60196e-20	0.201589	0.273	0.18	5.20392e-17	CD8 T	TRAF5	Healthy
1.2121e-151	0.435006	0.421	0.155	2.42419e-148	B cells	TRAF5	Healthy
0	1.11928	0.957	0.272	0	CD4 T	TRAC	Healthy
3.07334e-290	0.707175	0.848	0.394	6.14669e-287	CD8 T	TRAC	Healthy
1.72741e-306	1.17369	0.697	0.065	3.45481e-303	CD4 T	TRAC	Patient 1_Preinfusion
7.75856e-121	0.849847	0.645	0.115	1.55171e-117	CD8 T	TRAC	Patient 1_Preinfusion
9.16883e-213	0.595633	0.499	0.133	1.83377e-209	CD8 T	TRAC	Patient 1_Day 7
1.48141e-10	0.210489	0.861	0.604	2.96281e-07	CD4 T	TRAC	Patient 1_Day 13
1.85201e-102	0.664544	0.72	0.275	3.70402e-99	CD8 T	TRAC	Patient 1_Day 13
8.33613e-128	1.1193	0.931	0.1	1.66723e-124	CD4 T	TRAC	Patient 2_Preinfusion
3.97978e-267	1.71404	0.912	0.056	7.95957e-264	CD8 T	TRAC	Patient 2_Preinfusion
1.2285e-07	0.832638	0.549	0.18	0.000245701	CD8 T	TRAC	Patient 2_Day 24
0	1.47724	0.915	0.133	0	CD8 T	TRAC	Patient 2_Day 31
0	0.738502	0.525	0.045	0	CD4 T	TRAC	Patient 3_Preinfusion
3.57289e-217	0.711859	0.509	0.071	7.14577e-214	CD8 T	TRAC	Patient 3_Preinfusion
0	0.574377	0.537	0.152	0	CD8 T	TRAC	Patient 3_Day 24
0	0.511542	0.44	0.069	0	CD4 T	TRAC	Patient 4_Preinfusion
1.65464e-116	0.543978	0.452	0.139	3.30927e-113	CD8 T	TRAC	Patient 4_Preinfusion
4.50259e-34	0.684352	0.625	0.121	9.00517e-31	CD4 T	TRAC	Patient 4_Day 8
2.2712e-215	1.01311	0.514	0.035	4.5424e-212	CD8 T	TRAC	Patient 4_Day 8
1.10211e-107	0.569221	0.882	0.38	2.20421e-104	CD4 T	TRAC	Patient 4_Day 21
0	1.197	0.862	0.167	0	CD8 T	TRAC	Patient 4_Day 21
1.64294e-07	0.260837	0.961	0.934	0.000328588	CD8 T	TRAC	Patient 3_Product
0	0.704476	0.558	0.074	0	CD4 T	TRABD2A	Healthy
3.43246e-34	0.267328	0.269	0.014	6.86492e-31	CD4 T	TRABD2A	Patient 2_Day 31
2.22426e-59	0.245579	0.205	0.017	4.44852e-56	CD4 T	TRABD2A	Patient 4_Day 21
4.51238e-67	0.506325	0.212	0.009	9.02475e-64	CD8 T	TPX2	Patient 1_Preinfusion
7.29219e-12	0.312988	0.429	0.22	1.45844e-08	CD8 T	TPX2	Patient 1_Product
6.81097e-08	0.304522	0.489	0.318	0.000136219	CD8 T	TPX2	Patient 3_Product
5.57036e-14	0.231124	0.393	0.216	1.11407e-10	CD8 T	TPX2	Patient 4_Product
4.45583e-11	0.434181	0.63	0.296	8.91165e-08	Gamma Delta T	TPST2	Healthy
5.81259e-241	1.74921	0.617	0.296	1.16252e-237	Megakaryocytes	TPST2	Healthy
9.30089e-144	0.666827	0.708	0.278	1.86018e-140	NK	TPST2	Healthy
1.38421e-202	2.16319	0.614	0.267	2.76841e-199	Megakaryocytes	TPST2	Patient 1_Preinfusion
1.87029e-28	0.216291	0.284	0.269	3.74058e-25	CD8 T	TPST2	Patient 1_Day 7
5.13049e-24	1.22612	0.692	0.277	1.0261e-20	Megakaryocytes	TPST2	Patient 1_Day 7
7.11472e-26	0.341255	0.461	0.292	1.42294e-22	CD8 T	TPST2	Patient 2_Preinfusion
1.23995e-21	1.65363	0.778	0.308	2.4799e-18	Megakaryocytes	TPST2	Patient 2_Preinfusion
2.62599e-07	0.473385	0.459	0.307	0.000525198	NK	TPST2	Patient 2_Preinfusion
1.38599e-88	0.412156	0.511	0.298	2.77198e-85	CD8 T	TPST2	Patient 2_Day 31
5.77087e-30	1.70121	1	0.417	1.15417e-26	Megakaryocytes	TPST2	Patient 2_Day 31
7.80896e-104	1.86915	0.54	0.143	1.56179e-100	Megakaryocytes	TPST2	Patient 3_Preinfusion
1.5483e-98	1.22369	0.5	0.147	3.0966e-95	Megakaryocytes	TPST2	Patient 4_Preinfusion
6.99662e-70	1.57656	0.474	0.325	1.39932e-66	Megakaryocytes	TPST2	Patient 4_Day 8
4.10864e-70	0.30467	0.436	0.28	8.21729e-67	CD8 T	TPST2	Patient 4_Day 21
2.0991e-15	0.389138	0.503	0.332	4.1982e-12	Gamma Delta T	TPST2	Patient 4_Day 21
4.44593e-53	1.88646	0.55	0.336	8.89187e-50	Megakaryocytes	TPST2	Patient 4_Day 21
4.03856e-32	0.387789	0.509	0.325	8.07712e-29	NK	TPST2	Patient 4_Day 21
4.09913e-14	1.4449	0.833	0.002	8.19825e-11	B cells	TPM2	Patient 2_Day 31
2.3381e-38	1.6878	0.727	0.003	4.67621e-35	B cells	TPM2	Patient 4_Day 21
1.15632e-275	2.27278	0.661	0.102	2.31263e-272	Megakaryocytes	TPM1	Healthy
4.23668e-167	2.30871	0.632	0.123	8.47336e-164	Megakaryocytes	TPM1	Patient 1_Preinfusion
4.2749e-22	1.39393	0.615	0.046	8.5498e-19	Megakaryocytes	TPM1	Patient 1_Day 7
9.34893e-09	1.46945	0.5	0.016	1.86979e-05	Megakaryocytes	TPM1	Patient 1_Day 13
1.76359e-51	2.31324	1	0.086	3.52718e-48	Megakaryocytes	TPM1	Patient 2_Preinfusion
3.00732e-34	1.64792	0.667	0.083	6.01463e-31	Megakaryocytes	TPM1	Patient 2_Day 31
1.53835e-218	2.93299	0.86	0.052	3.07669e-215	Megakaryocytes	TPM1	Patient 3_Preinfusion
1.61611e-23	1.52523	0.65	0.026	3.23221e-20	Megakaryocytes	TPM1	Patient 3_Day 24
1.63487e-87	1.30881	0.512	0.053	3.26974e-84	Megakaryocytes	TPM1	Patient 4_Preinfusion
7.26739e-141	3.04564	0.789	0.108	1.45348e-137	Megakaryocytes	TPM1	Patient 4_Day 8
1.07092e-108	2.79927	0.7	0.095	2.14184e-105	Megakaryocytes	TPM1	Patient 4_Day 21
3.1643e-23	0.329693	0.97	0.684	6.32861e-20	DC	TPI1	Healthy
0	0.372489	0.924	0.575	0	Monocytes	TPI1	Healthy
1.22117e-30	0.396788	1	0.808	2.44234e-27	DC	TPI1	Patient 1_Preinfusion
1.00192e-18	0.384616	1	0.543	2.00384e-15	DC	TPI1	Patient 1_Day 7
2.36593e-140	0.299329	0.833	0.469	4.73186e-137	Monocytes	TPI1	Patient 1_Day 7
2.45024e-10	0.238336	0.308	0.549	4.90048e-07	Megakaryocytes	TPI1	Patient 1_Day 7
3.78102e-36	0.224807	0.801	0.46	7.56204e-33	Monocytes	TPI1	Patient 1_Day 13
1.09025e-08	0.210787	0.988	0.768	2.18049e-05	DC	TPI1	Patient 2_Preinfusion
1.55611e-08	0.373791	0.977	0.654	3.11222e-05	DC	TPI1	Patient 2_Day 31
2.14566e-42	0.223981	0.807	0.583	4.29133e-39	Monocytes	TPI1	Patient 2_Day 31
1.93973e-123	0.247498	0.961	0.56	3.87946e-120	DC	TPI1	Patient 3_Preinfusion
1.1017e-20	0.230181	0.26	0.584	2.20341e-17	Megakaryocytes	TPI1	Patient 3_Preinfusion
7.06172e-77	0.346348	0.98	0.539	1.41234e-73	DC	TPI1	Patient 4_Preinfusion
1.81986e-14	0.284577	0.981	0.703	3.63972e-11	DC	TPI1	Patient 4_Day 8
1.48729e-33	0.488211	0.289	0.715	2.97457e-30	Megakaryocytes	TPI1	Patient 4_Day 8
3.63271e-11	0.26238	0.99	0.775	7.26542e-08	DC	TPI1	Patient 4_Day 21
3.44272e-162	0.241039	0.93	0.655	6.88544e-159	Monocytes	TPI1	Patient 4_Day 21
3.19885e-10	0.305374	0.4	0.78	6.3977e-07	Megakaryocytes	TPI1	Patient 4_Day 21
1.32206e-11	0.279575	0.862	0.584	2.64413e-08	DC	TPI1	Patient 3_Day 24 CAR T
6.05428e-32	0.374818	0.235	0.222	1.21086e-28	CD8 T	TP53INP1	Patient 1_Preinfusion
4.70693e-30	0.276913	0.389	0.106	9.41386e-27	CD4 T	TP53INP1	Patient 1_Day 7
3.5186e-70	0.839301	0.235	0.014	7.03719e-67	CD8 T	TOP2A	Patient 1_Preinfusion
6.42326e-26	0.654659	0.556	0.241	1.28465e-22	CD8 T	TOP2A	Patient 1_Product
4.60324e-19	0.324541	0.277	0.065	9.20648e-16	CD8 T	TOP2A	Patient 2_Product
1.44181e-12	0.487087	0.614	0.384	2.88363e-09	CD8 T	TOP2A	Patient 3_Product
1.60397e-24	0.458176	0.491	0.267	3.20794e-21	CD8 T	TOP2A	Patient 4_Product
1.31682e-103	0.238616	0.369	0.17	2.63364e-100	CD4 T	TNRC6C	Healthy
5.96884e-41	0.254656	0.333	0.206	1.19377e-37	CD8 T	TNRC6C	Healthy
2.16998e-62	0.254677	0.61	0.652	4.33996e-59	CD8 T	TNRC6B	Healthy
3.06179e-62	0.233443	0.676	0.641	6.12358e-59	B cells	TNRC6B	Healthy
4.3562e-38	0.389015	0.388	0.473	8.71239e-35	CD8 T	TNRC6B	Patient 1_Preinfusion
3.06799e-46	0.612184	0.291	0.319	6.13597e-43	CD8 T	TNRC6B	Patient 1_Day 7
1.95978e-08	0.278799	0.556	0.415	3.91957e-05	CD4 T	TNRC6B	Patient 2_Preinfusion
9.79899e-69	0.237747	0.517	0.586	1.9598e-65	CD8 T	TNRC6B	Patient 2_Day 31
4.63199e-32	0.254577	0.193	0.207	9.26398e-29	CD8 T	TNRC6B	Patient 4_Preinfusion
5.01655e-64	0.293381	0.299	0.421	1.00331e-60	CD8 T	TNRC6B	Patient 4_Day 8
6.0264e-14	0.348099	0.331	0.308	1.20528e-10	CD8 T	TNRC6B	Patient 3_Day 24 CAR T
7.25938e-74	1.22388	0.339	0.006	1.45188e-70	Megakaryocytes	TNNC2	Healthy
5.4422e-11	1.69304	0.444	0.004	1.08844e-07	Megakaryocytes	TNNC2	Patient 2_Preinfusion
2.18798e-23	0.315909	0.22	0.059	4.37596e-20	CD8 T	TNIK	Patient 1_Preinfusion
7.60423e-20	0.789038	0.211	0.07	1.52085e-16	Megakaryocytes	TNIK	Patient 1_Preinfusion
7.10976e-14	0.205956	0.238	0.05	1.42195e-10	CD4 T	TNIK	Patient 2_Preinfusion
1.54883e-34	0.315297	0.245	0.039	3.09767e-31	CD8 T	TNIK	Patient 2_Preinfusion
1.14425e-43	0.270802	0.25	0.095	2.2885e-40	CD8 T	TNIK	Patient 2_Day 31
1.40011e-40	0.388484	0.202	0.051	2.80023e-37	CD8 T	TNIK	Patient 4_Day 8
1.39553e-60	0.225377	0.238	0.087	2.79106e-57	CD8 T	TNIK	Patient 4_Day 21
5.41123e-09	0.743624	0.25	0.141	1.08225e-05	Megakaryocytes	TNIK	Patient 4_Day 21
4.67892e-135	0.574133	0.37	0.047	9.35784e-132	CD4 T	TNFSF8	Patient 1_Preinfusion
6.08819e-19	0.25237	0.256	0.042	1.21764e-15	CD4 T	TNFSF8	Patient 2_Preinfusion
4.26275e-46	0.885902	0.226	0.006	8.52549e-43	Megakaryocytes	TNFSF4	Healthy
6.20587e-20	0.857168	0.211	0.009	1.24117e-16	Megakaryocytes	TNFSF4	Patient 1_Preinfusion
8.02275e-15	0.919754	0.583	0.003	1.60455e-11	Megakaryocytes	TNFSF4	Patient 2_Day 31
1.66741e-21	1.13505	0.22	0.003	3.33483e-18	Megakaryocytes	TNFSF4	Patient 3_Preinfusion
1.76193e-12	0.884408	0.25	0.001	3.52386e-09	Megakaryocytes	TNFSF4	Patient 3_Day 24
9.8983e-31	0.648104	0.232	0.004	1.97966e-27	Megakaryocytes	TNFSF4	Patient 4_Preinfusion
3.69208e-17	1.52186	0.3	0.001	7.38416e-14	Megakaryocytes	TNFSF4	Patient 4_Day 21
2.07038e-65	0.332285	0.927	0.328	4.14076e-62	DC	TNFSF13B	Healthy
0	1.07285	0.886	0.074	0	Monocytes	TNFSF13B	Healthy
0	1.25017	0.944	0.148	0	Monocytes	TNFSF13B	Patient 1_Preinfusion
2.49322e-42	0.353818	0.912	0.217	4.98644e-39	DC	TNFSF13B	Patient 1_Day 7
0	1.32277	0.929	0.028	0	Monocytes	TNFSF13B	Patient 1_Day 7
3.47786e-14	0.26066	0.778	0.086	6.95572e-11	DC	TNFSF13B	Patient 1_Day 13
3.71602e-218	0.533106	0.676	0.014	7.43204e-215	Monocytes	TNFSF13B	Patient 1_Day 13
7.86616e-261	1.08311	0.843	0.141	1.57323e-257	Monocytes	TNFSF13B	Patient 2_Preinfusion
4.92607e-17	0.21891	0.86	0.311	9.85214e-14	DC	TNFSF13B	Patient 2_Day 31
0	1.17585	0.892	0.027	0	Monocytes	TNFSF13B	Patient 2_Day 31
0	0.663857	0.619	0.146	0	Monocytes	TNFSF13B	Patient 3_Preinfusion
5.45753e-53	0.211231	0.613	0.134	1.09151e-49	DC	TNFSF13B	Patient 3_Day 24
0	0.501925	0.464	0.016	0	Monocytes	TNFSF13B	Patient 3_Day 24
0	0.623836	0.709	0.064	0	Monocytes	TNFSF13B	Patient 4_Preinfusion
0	0.931988	0.829	0.093	0	Monocytes	TNFSF13B	Patient 4_Day 8
0	1.15857	0.884	0.048	0	Monocytes	TNFSF13B	Patient 4_Day 21
0	0.705691	0.834	0.242	0	Monocytes	TNFSF10	Healthy
1.81889e-281	0.739714	0.823	0.299	3.63778e-278	Monocytes	TNFSF10	Patient 1_Preinfusion
1.39243e-34	0.400354	0.971	0.296	2.78486e-31	DC	TNFSF10	Patient 1_Day 7
0	1.25928	0.931	0.128	0	Monocytes	TNFSF10	Patient 1_Day 7
4.02927e-60	0.248898	0.361	0.044	8.05855e-57	Monocytes	TNFSF10	Patient 1_Day 13
1.32484e-96	0.645147	0.703	0.27	2.64968e-93	Monocytes	TNFSF10	Patient 2_Preinfusion
0	1.17734	0.887	0.175	0	Monocytes	TNFSF10	Patient 2_Day 31
0	0.460709	0.504	0.099	0	Monocytes	TNFSF10	Patient 3_Day 24
1.62991e-156	0.240178	0.427	0.183	3.25982e-153	Monocytes	TNFSF10	Patient 4_Preinfusion
1.05203e-132	0.328951	0.644	0.223	2.10406e-129	Monocytes	TNFSF10	Patient 4_Day 8
0	1.24469	0.939	0.25	0	Monocytes	TNFSF10	Patient 4_Day 21
4.22494e-163	0.735551	0.329	0.012	8.44988e-160	CD4 T	TNFRSF4	Patient 1_Preinfusion
4.55585e-67	0.492944	0.248	0.006	9.11169e-64	CD4 T	TNFRSF4	Patient 1_Day 7
1.47851e-43	0.342274	0.278	0.005	2.95702e-40	CD4 T	TNFRSF4	Patient 1_Day 13
3.02266e-93	0.835347	0.456	0.003	6.04531e-90	CD4 T	TNFRSF4	Patient 2_Preinfusion
3.78009e-57	0.495354	0.333	0.006	7.56017e-54	CD4 T	TNFRSF4	Patient 2_Day 31
1.72576e-252	0.448033	0.233	0.006	3.45151e-249	CD4 T	TNFRSF4	Patient 3_Preinfusion
1.41358e-248	0.234002	0.244	0.024	2.82716e-245	CD4 T	TNFRSF4	Patient 4_Preinfusion
4.33956e-45	0.598003	0.33	0.005	8.67912e-42	CD4 T	TNFRSF4	Patient 4_Day 8
3.46549e-100	0.503773	0.273	0.012	6.93099e-97	CD4 T	TNFRSF4	Patient 4_Day 21
7.2412e-07	0.209766	0.217	0.106	0.00144824	CD4 T	TNFRSF4	Patient 2_Product
1.36172e-245	0.344746	0.399	0.105	2.72343e-242	CD4 T	TNFRSF25	Healthy
2.09347e-75	0.350573	0.339	0.16	4.18693e-72	CD8 T	TNFRSF25	Healthy
4.37869e-34	0.297101	0.294	0.02	8.75739e-31	CD4 T	TNFRSF25	Patient 2_Preinfusion
2.72396e-27	0.268715	0.385	0.073	5.44792e-24	CD4 T	TNFRSF25	Patient 2_Day 31
1.17324e-18	0.317647	0.241	0.02	2.34647e-15	CD4 T	TNFRSF25	Patient 4_Day 8
5.9481e-70	0.276966	0.294	0.037	1.18962e-66	CD4 T	TNFRSF25	Patient 4_Day 21
3.52532e-09	0.261473	0.259	0.052	7.05065e-06	Gamma Delta T	TNFRSF18	Healthy
3.8527e-61	0.344457	0.264	0.043	7.70541e-58	NK	TNFRSF18	Healthy
2.46553e-133	0.598206	0.266	0.008	4.93106e-130	CD4 T	TNFRSF18	Patient 1_Preinfusion
4.19421e-84	0.676738	0.419	0.003	8.38842e-81	CD4 T	TNFRSF18	Patient 2_Preinfusion
3.34575e-34	0.256637	0.224	0.006	6.6915e-31	CD4 T	TNFRSF18	Patient 2_Day 31
1.02483e-60	0.50449	0.259	0.023	2.04967e-57	NK	TNFRSF18	Patient 4_Day 21
0	1.25206	0.734	0.032	0	B cells	TNFRSF13C	Healthy
2.70788e-48	0.248392	0.293	0.237	5.41576e-45	CD8 T	TNFAIP3	Healthy
3.83716e-47	0.368209	0.358	0.245	7.67431e-44	CD4 T	TNFAIP3	Patient 1_Preinfusion
1.45235e-25	0.453776	0.43	0.247	2.90469e-22	CD8 T	TNFAIP3	Patient 1_Preinfusion
2.53841e-79	0.87933	0.601	0.549	5.07683e-76	CD8 T	TNFAIP3	Patient 1_Day 7
5.32546e-23	0.222161	0.29	0.156	1.06509e-19	CD8 T	TNFAIP3	Patient 1_Day 13
2.75635e-07	0.334691	0.581	0.43	0.000551269	CD4 T	TNFAIP3	Patient 2_Preinfusion
2.62659e-16	0.353989	0.577	0.422	5.25317e-13	CD8 T	TNFAIP3	Patient 2_Preinfusion
1.15962e-54	0.343718	0.421	0.279	2.31923e-51	CD8 T	TNFAIP3	Patient 2_Day 31
3.67657e-08	0.284311	0.372	0.352	7.35314e-05	CD8 T	TNFAIP3	Patient 3_Preinfusion
7.30588e-59	0.224465	0.276	0.181	1.46118e-55	CD8 T	TNFAIP3	Patient 3_Day 24
6.47039e-61	0.522798	0.548	0.522	1.29408e-57	CD8 T	TNFAIP3	Patient 4_Preinfusion
3.74406e-08	0.371602	0.493	0.525	7.48812e-05	NK	TNFAIP3	Patient 4_Preinfusion
1.01504e-108	0.834075	0.516	0.267	2.03009e-105	CD8 T	TNFAIP3	Patient 4_Day 8
1.00189e-110	0.361786	0.326	0.137	2.00378e-107	CD8 T	TNFAIP3	Patient 4_Day 21
1.32545e-64	0.341608	0.89	0.314	2.6509e-61	DC	TNFAIP2	Healthy
0	1.10079	0.881	0.054	0	Monocytes	TNFAIP2	Healthy
0	1.0409	0.827	0.107	0	Monocytes	TNFAIP2	Patient 1_Preinfusion
1.28451e-29	0.306159	0.765	0.156	2.56902e-26	DC	TNFAIP2	Patient 1_Day 7
0	0.675349	0.688	0.016	0	Monocytes	TNFAIP2	Patient 1_Day 7
1.37086e-124	0.271114	0.402	0.005	2.74173e-121	Monocytes	TNFAIP2	Patient 1_Day 13
3.69545e-177	0.820997	0.694	0.103	7.3909e-174	Monocytes	TNFAIP2	Patient 2_Preinfusion
4.2143e-14	0.248492	0.767	0.25	8.4286e-11	DC	TNFAIP2	Patient 2_Day 31
0	0.836448	0.732	0.017	0	Monocytes	TNFAIP2	Patient 2_Day 31
0	0.684877	0.584	0.114	0	Monocytes	TNFAIP2	Patient 3_Preinfusion
0	0.58254	0.498	0.012	0	Monocytes	TNFAIP2	Patient 3_Day 24
0	0.587216	0.522	0.037	0	Monocytes	TNFAIP2	Patient 4_Preinfusion
6.81777e-285	0.630677	0.639	0.062	1.36355e-281	Monocytes	TNFAIP2	Patient 4_Day 8
0	0.984631	0.801	0.024	0	Monocytes	TNFAIP2	Patient 4_Day 21
4.09151e-06	0.213005	0.284	0.092	0.00818303	Gamma Delta T	TMIGD2	Healthy
8.62761e-68	0.397356	0.353	0.08	1.72552e-64	NK	TMIGD2	Healthy
8.32779e-07	0.350997	0.5	0.002	0.00166556	B cells	TMIGD2	Patient 2_Day 31
7.824e-07	0.207616	0.273	0.013	0.0015648	B cells	TMIGD2	Patient 4_Day 21
1.91026e-63	0.303505	0.334	0.255	3.82052e-60	CD8 T	TMEM63A	Healthy
0	0.399694	0.418	0.005	0	Monocytes	TMEM176A	Healthy
1.65772e-142	0.644774	0.562	0.049	3.31544e-139	Monocytes	TMEM176A	Patient 2_Preinfusion
0	0.710324	0.676	0.004	0	Monocytes	TMEM176A	Patient 2_Day 31
9.29708e-84	1.28205	0.374	0.003	1.85942e-80	Megakaryocytes	TMEM158	Healthy
7.61072e-31	1.11643	0.281	0.004	1.52214e-27	Megakaryocytes	TMEM158	Patient 1_Preinfusion
9.19794e-07	1.05003	0.5	0	0.00183959	Megakaryocytes	TMEM158	Patient 1_Day 13
1.78323e-18	1.86402	0.778	0.005	3.56647e-15	Megakaryocytes	TMEM158	Patient 2_Preinfusion
5.36001e-12	1.42514	0.417	0.001	1.072e-08	Megakaryocytes	TMEM158	Patient 2_Day 31
6.07669e-28	1.10519	0.26	0.007	1.21534e-24	Megakaryocytes	TMEM158	Patient 3_Preinfusion
2.22749e-68	1.05386	0.415	0.009	4.45499e-65	Megakaryocytes	TMEM158	Patient 4_Preinfusion
2.17446e-23	1.41929	0.263	0.005	4.34892e-20	Megakaryocytes	TMEM158	Patient 4_Day 8
6.77603e-29	2.07269	0.5	0.004	1.35521e-25	Megakaryocytes	TMEM158	Patient 4_Day 21
4.85222e-266	0.586792	0.479	0.13	9.70444e-263	B cells	TMEM156	Healthy
2.82101e-86	0.411396	0.233	0.023	5.64201e-83	CD4 T	TMEM156	Patient 1_Preinfusion
2.17941e-13	0.352104	0.277	0.05	4.35882e-10	CD4 T	TMEM156	Patient 4_Day 8
6.90071e-11	0.292402	0.202	0.05	1.38014e-07	NK	TMEM156	Patient 4_Day 8
1.33524e-120	1.3342	0.365	0.039	2.67048e-117	Megakaryocytes	TMEM140	Healthy
1.34716e-120	2.37691	0.632	0.044	2.69432e-117	Megakaryocytes	TMEM140	Patient 1_Preinfusion
4.56315e-31	1.86598	0.615	0.053	9.1263e-28	Megakaryocytes	TMEM140	Patient 1_Day 7
2.57923e-06	0.940579	0.75	0.019	0.00515846	Megakaryocytes	TMEM140	Patient 1_Day 13
1.95571e-36	2.55978	1	0.022	3.91142e-33	Megakaryocytes	TMEM140	Patient 2_Preinfusion
1.27426e-32	1.90691	0.75	0.043	2.54851e-29	Megakaryocytes	TMEM140	Patient 2_Day 31
2.7475e-81	1.96334	0.54	0.014	5.495e-78	Megakaryocytes	TMEM140	Patient 3_Preinfusion
2.65145e-11	0.758263	0.4	0.014	5.3029e-08	Megakaryocytes	TMEM140	Patient 3_Day 24
2.07638e-125	1.77877	0.646	0.023	4.15277e-122	Megakaryocytes	TMEM140	Patient 4_Preinfusion
4.14168e-25	1.84783	0.316	0.015	8.28335e-22	Megakaryocytes	TMEM140	Patient 4_Day 8
5.24323e-69	3.10404	0.6	0.038	1.04865e-65	Megakaryocytes	TMEM140	Patient 4_Day 21
2.13668e-36	0.337304	0.222	0.038	4.27335e-33	CD8 T	TMEM106C	Patient 1_Preinfusion
4.68e-39	0.316054	0.219	0.024	9.35999e-36	CD8 T	TMEM106C	Patient 2_Preinfusion
0	1.30766	0.983	0.399	0	Monocytes	TKT	Healthy
0	0.945705	0.965	0.458	0	Monocytes	TKT	Patient 1_Preinfusion
2.93237e-26	0.26601	0.985	0.421	5.86475e-23	DC	TKT	Patient 1_Day 7
0	0.91465	0.917	0.29	0	Monocytes	TKT	Patient 1_Day 7
8.63953e-10	0.315672	0.833	0.191	1.72791e-06	DC	TKT	Patient 1_Day 13
1.5316e-168	0.720153	0.795	0.117	3.06319e-165	Monocytes	TKT	Patient 1_Day 13
3.46713e-220	1.01239	0.912	0.399	6.93425e-217	Monocytes	TKT	Patient 2_Preinfusion
1.26091e-08	0.394395	0.93	0.507	2.52183e-05	DC	TKT	Patient 2_Day 31
0	1.21852	0.938	0.298	0	Monocytes	TKT	Patient 2_Day 31
0	0.76341	0.802	0.324	0	Monocytes	TKT	Patient 3_Preinfusion
0	0.739744	0.766	0.195	0	Monocytes	TKT	Patient 3_Day 24
0	0.826026	0.822	0.215	0	Monocytes	TKT	Patient 4_Preinfusion
0	1.18482	0.967	0.359	0	Monocytes	TKT	Patient 4_Day 8
0	1.48147	0.986	0.378	0	Monocytes	TKT	Patient 4_Day 21
3.87041e-34	0.28339	0.89	0.432	7.74082e-31	DC	TIMP1	Healthy
0	0.437947	0.81	0.26	0	Monocytes	TIMP1	Healthy
0	2.1371	0.896	0.434	0	Megakaryocytes	TIMP1	Healthy
8.63647e-192	0.227089	0.949	0.601	1.72729e-188	Monocytes	TIMP1	Patient 1_Preinfusion
1.53689e-151	1.98064	0.965	0.852	3.07377e-148	Megakaryocytes	TIMP1	Patient 1_Preinfusion
3.70081e-38	0.53245	0.985	0.272	7.40163e-35	DC	TIMP1	Patient 1_Day 7
0	1.13786	0.93	0.098	0	Monocytes	TIMP1	Patient 1_Day 7
8.21896e-69	2.33349	1	0.276	1.64379e-65	Megakaryocytes	TIMP1	Patient 1_Day 7
1.39835e-130	0.517161	0.671	0.081	2.7967e-127	Monocytes	TIMP1	Patient 1_Day 13
6.07347e-19	0.314571	0.458	0.133	1.21469e-15	CD4 T	TIMP1	Patient 1_Day 13
1.59232e-20	2.15785	0.5	0.148	3.18464e-17	Megakaryocytes	TIMP1	Patient 1_Day 13
5.18261e-98	0.500136	0.799	0.351	1.03652e-94	Monocytes	TIMP1	Patient 2_Preinfusion
3.76099e-26	1.78646	0.889	0.714	7.52197e-23	Megakaryocytes	TIMP1	Patient 2_Preinfusion
1.6579e-09	0.321397	0.471	0.036	3.3158e-06	Monocytes	TIMP1	Patient 2_Day 24
4.8292e-17	0.441024	0.953	0.341	9.6584e-14	DC	TIMP1	Patient 2_Day 31
0	0.874372	0.823	0.109	0	Monocytes	TIMP1	Patient 2_Day 31
4.67147e-36	2.13325	1	0.346	9.34294e-33	Megakaryocytes	TIMP1	Patient 2_Day 31
0	0.403897	0.797	0.433	0	Monocytes	TIMP1	Patient 3_Preinfusion
1.96268e-136	2.01242	0.92	0.7	3.92537e-133	Megakaryocytes	TIMP1	Patient 3_Preinfusion
1.8128e-64	0.275744	0.82	0.225	3.62561e-61	DC	TIMP1	Patient 3_Day 24
0	0.742422	0.662	0.068	0	Monocytes	TIMP1	Patient 3_Day 24
3.45558e-12	1.34317	0.75	0.231	6.91116e-09	Megakaryocytes	TIMP1	Patient 3_Day 24
0	0.251304	0.859	0.508	0	Monocytes	TIMP1	Patient 4_Preinfusion
1.05531e-174	1.64642	0.915	0.706	2.11063e-171	Megakaryocytes	TIMP1	Patient 4_Preinfusion
0	0.585822	0.939	0.205	0	Monocytes	TIMP1	Patient 4_Day 8
5.96093e-124	2.40362	0.947	0.69	1.19219e-120	Megakaryocytes	TIMP1	Patient 4_Day 8
0	1.20602	0.935	0.193	0	Monocytes	TIMP1	Patient 4_Day 21
2.98507e-33	2.34942	0.95	0.524	5.97014e-30	Megakaryocytes	TIMP1	Patient 4_Day 21
1.63867e-06	0.217764	0.247	0.071	0.00327734	Gamma Delta T	TIGIT	Healthy
1.57886e-59	0.29762	0.3	0.06	3.15771e-56	NK	TIGIT	Healthy
2.70714e-36	0.298604	0.335	0.109	5.41427e-33	Gamma Delta T	TIGIT	Patient 1_Day 7
2.0388e-34	0.38654	0.206	0.004	4.0776e-31	CD4 T	TIGIT	Patient 2_Preinfusion
2.91792e-24	0.246963	0.276	0.033	5.83585e-21	CD4 T	TIGIT	Patient 2_Day 31
4.60637e-12	0.295125	0.235	0.038	9.21275e-09	NK	TIGIT	Patient 2_Day 31
8.01358e-10	0.325392	0.25	0.057	1.60272e-06	CD4 T	TIGIT	Patient 4_Day 8
1.67985e-15	0.34905	0.25	0.054	3.35969e-12	NK	TIGIT	Patient 4_Day 8
7.24164e-21	0.552363	0.349	0.102	1.44833e-17	Gamma Delta T	TIGIT	Patient 4_Day 21
9.36286e-110	0.578049	0.373	0.007	1.87257e-106	CD8 T	THEMIS	Patient 2_Preinfusion
2.10518e-163	0.553091	0.408	0.054	4.21037e-160	CD8 T	THEMIS	Patient 2_Day 31
1.27231e-211	0.397897	0.309	0.032	2.54461e-208	CD8 T	THEMIS	Patient 4_Day 21
2.2114e-65	1.04722	0.33	0.017	4.42281e-62	Megakaryocytes	THBS1	Healthy
4.35677e-10	0.562787	0.231	0.01	8.71354e-07	Megakaryocytes	THBS1	Patient 1_Day 7
1.71871e-07	0.982669	0.333	0.005	0.000343742	Megakaryocytes	THBS1	Patient 2_Day 31
2.37093e-184	0.30074	0.212	0.022	4.74186e-181	Monocytes	THBS1	Patient 3_Preinfusion
1.30338e-13	0.845545	0.26	0.161	2.60675e-10	Megakaryocytes	THBS1	Patient 3_Preinfusion
0	0.612591	0.405	0.014	0	Monocytes	THBS1	Patient 4_Preinfusion
2.87315e-22	1.01163	0.211	0.108	5.7463e-19	Megakaryocytes	THBS1	Patient 4_Day 8
1.0775e-16	0.341608	0.37	0.056	2.15501e-13	Gamma Delta T	TGFBR3	Healthy
7.06e-139	0.524561	0.412	0.04	1.412e-135	NK	TGFBR3	Healthy
2.44257e-78	0.419883	0.31	0.01	4.88513e-75	CD8 T	TGFBR3	Patient 2_Preinfusion
6.49048e-07	0.514218	0.243	0.037	0.0012981	NK	TGFBR3	Patient 2_Preinfusion
1.78284e-95	0.398136	0.301	0.046	3.56569e-92	CD8 T	TGFBR3	Patient 2_Day 31
4.4195e-74	0.607192	0.236	0.024	8.83901e-71	CD8 T	TGFBR3	Patient 4_Day 8
2.20982e-13	0.346965	0.25	0.06	4.41964e-10	NK	TGFBR3	Patient 4_Day 8
1.89541e-129	0.324822	0.236	0.034	3.79083e-126	CD8 T	TGFBR3	Patient 4_Day 21
2.42585e-47	0.897017	0.226	0.005	4.8517e-44	Megakaryocytes	TGFB1I1	Healthy
7.44246e-44	1.66192	0.404	0.005	1.48849e-40	Megakaryocytes	TGFB1I1	Patient 1_Preinfusion
2.1266e-14	0.673834	0.269	0.001	4.25321e-11	Megakaryocytes	TGFB1I1	Patient 1_Day 7
6.91616e-20	0.974633	0.667	0.001	1.38323e-16	Megakaryocytes	TGFB1I1	Patient 2_Day 31
9.42179e-27	1.48702	0.342	0.001	1.88436e-23	Megakaryocytes	TGFB1I1	Patient 4_Day 8
1.94457e-23	1.63883	0.4	0.003	3.88915e-20	Megakaryocytes	TGFB1I1	Patient 4_Day 21
4.75603e-52	0.816396	0.26	0.108	9.51207e-49	CD8 T	TFRC	Patient 1_Preinfusion
2.99544e-16	0.499624	0.531	0.138	5.99088e-13	Gamma Delta T	TFDP2	Healthy
2.96964e-74	0.432426	0.442	0.125	5.93929e-71	NK	TFDP2	Healthy
3.69877e-49	0.554978	0.285	0.064	7.39753e-46	CD8 T	TFDP2	Patient 1_Preinfusion
2.46373e-44	0.387272	0.317	0.061	4.92746e-41	CD8 T	TFDP2	Patient 2_Preinfusion
9.55418e-10	0.767173	0.378	0.082	1.91084e-06	NK	TFDP2	Patient 2_Preinfusion
2.77048e-72	0.342001	0.326	0.109	5.54096e-69	CD8 T	TFDP2	Patient 2_Day 31
1.22564e-36	0.29818	0.21	0.059	2.45129e-33	CD8 T	TFDP2	Patient 4_Day 8
1.49989e-17	0.361642	0.31	0.081	2.99978e-14	NK	TFDP2	Patient 4_Day 8
1.24477e-71	0.266294	0.263	0.091	2.48954e-68	CD8 T	TFDP2	Patient 4_Day 21
1.05622e-23	0.314681	0.277	0.146	2.11243e-20	NK	TFDP2	Patient 4_Day 21
1.8604e-299	0.411974	0.424	0.099	3.72081e-296	CD4 T	TESPA1	Healthy
2.03852e-26	0.231728	0.219	0.013	4.07704e-23	CD4 T	TESPA1	Patient 2_Preinfusion
6.02736e-20	0.219451	0.288	0.051	1.20547e-16	CD4 T	TESPA1	Patient 2_Day 31
2.97316e-42	0.202318	0.209	0.032	5.94632e-39	CD4 T	TESPA1	Patient 4_Day 21
1.41808e-69	0.317544	0.244	0.035	2.83615e-66	CD4 T	TENT5C	Patient 1_Preinfusion
1.88637e-65	0.652461	0.328	0.042	3.77275e-62	CD8 T	TENT5C	Patient 1_Preinfusion
8.38387e-37	0.436098	0.216	0.099	1.67677e-33	CD8 T	TENT5C	Patient 1_Day 7
7.61807e-07	0.247955	0.328	0.172	0.00152361	Gamma Delta T	TENT5C	Patient 1_Day 13
1.15505e-50	0.501684	0.388	0.021	2.31011e-47	CD4 T	TENT5C	Patient 2_Preinfusion
1.2052e-64	0.502124	0.243	0.07	2.41041e-61	CD8 T	TENT5C	Patient 4_Preinfusion
2.40879e-16	0.278698	0.33	0.065	4.81758e-13	CD4 T	TENT5C	Patient 4_Day 8
2.25862e-47	0.434269	0.208	0.037	4.51723e-44	CD8 T	TENT5C	Patient 4_Day 8
2.10977e-18	0.307543	0.298	0.063	4.21953e-15	NK	TENT5C	Patient 4_Day 8
0	0.912328	0.869	0.236	0	CD4 T	TCF7	Healthy
2.34733e-86	0.45731	0.628	0.375	4.69467e-83	CD8 T	TCF7	Healthy
4.19745e-108	0.50494	0.348	0.067	8.39489e-105	CD4 T	TCF7	Patient 1_Preinfusion
1.02976e-14	0.327384	0.22	0.098	2.05952e-11	CD8 T	TCF7	Patient 1_Preinfusion
1.19398e-38	0.382752	0.306	0.019	2.38795e-35	CD4 T	TCF7	Patient 2_Preinfusion
4.40431e-30	0.402948	0.455	0.088	8.80861e-27	CD4 T	TCF7	Patient 2_Day 31
4.11531e-09	0.238003	0.277	0.077	8.23062e-06	CD4 T	TCF7	Patient 4_Day 8
6.81664e-68	0.41108	0.418	0.098	1.36333e-64	CD4 T	TCF7	Patient 4_Day 21
3.23803e-06	0.310682	0.477	0.3	0.00647606	CD4 T	TCF7	Patient 1_Product
2.24865e-10	0.460115	0.397	0.193	4.4973e-07	CD4 T	TCF7	Patient 3_Product
3.38067e-11	1.06456	0.417	0.002	6.76134e-08	Megakaryocytes	TCEAL9	Patient 2_Day 31
3.12282e-171	0.245322	0.377	0.131	6.24565e-168	CD4 T	TC2N	Healthy
2.17233e-161	0.502074	0.445	0.155	4.34466e-158	CD8 T	TC2N	Healthy
1.59111e-25	0.478003	0.209	0.201	3.18221e-22	Megakaryocytes	TC2N	Healthy
1.85286e-41	0.444234	0.215	0.027	3.70572e-38	CD8 T	TC2N	Patient 1_Preinfusion
6.17488e-84	0.375098	0.317	0.07	1.23498e-80	CD8 T	TC2N	Patient 2_Day 31
1.38959e-10	0.274066	0.336	0.322	2.77918e-07	CD8 T	TC2N	Patient 3_Day 24 CAR T
6.92327e-50	0.88766	0.261	0.012	1.38465e-46	Megakaryocytes	TBXA2R	Healthy
4.60814e-32	1.23215	0.28	0.001	9.21628e-29	Megakaryocytes	TBXA2R	Patient 3_Preinfusion
5.38539e-32	0.658603	0.22	0.002	1.07708e-28	Megakaryocytes	TBXA2R	Patient 4_Preinfusion
1.68099e-12	0.956679	0.25	0.001	3.36199e-09	Megakaryocytes	TBXA2R	Patient 4_Day 21
1.50009e-38	0.643377	0.642	0.069	3.00018e-35	Gamma Delta T	TBX21	Healthy
2.85965195812913e-320	0.881633	0.687	0.042	5.71930391625827e-317	NK	TBX21	Healthy
2.71893e-57	0.297876	0.21	0.004	5.43786e-54	CD8 T	TBX21	Patient 2_Preinfusion
3.59519e-66	0.298946	0.261	0.054	7.19037e-63	CD8 T	TBX21	Patient 2_Day 31
9.31561e-07	0.270477	0.382	0.165	0.00186312	NK	TBX21	Patient 2_Day 31
2.12264e-84	0.214266	0.201	0.043	4.24528e-81	CD8 T	TBX21	Patient 4_Day 21
8.20541e-14	0.335763	0.28	0.095	1.64108e-10	Gamma Delta T	TBX21	Patient 4_Day 21
1.15604e-16	0.254283	0.205	0.093	2.31208e-13	NK	TBX21	Patient 4_Day 21
9.44189e-99	0.220666	0.728	0.521	1.88838e-95	CD4 T	TBC1D10C	Healthy
1.68982e-91	0.389597	0.699	0.557	3.37964e-88	CD8 T	TBC1D10C	Healthy
6.28022e-57	0.425856	0.831	0.567	1.25604e-53	NK	TBC1D10C	Healthy
2.17168e-67	0.358569	0.317	0.142	4.34335e-64	CD4 T	TBC1D10C	Patient 1_Preinfusion
4.2565e-24	0.316916	0.338	0.153	8.51299e-21	CD8 T	TBC1D10C	Patient 1_Preinfusion
2.49883e-56	0.44818	0.378	0.217	4.99766e-53	CD8 T	TBC1D10C	Patient 1_Day 7
2.85494e-19	0.352626	0.531	0.194	5.70987e-16	CD4 T	TBC1D10C	Patient 2_Preinfusion
3.10922e-116	0.775621	0.661	0.161	6.21843e-113	CD8 T	TBC1D10C	Patient 2_Preinfusion
1.00768e-07	0.529841	0.568	0.206	0.000201536	NK	TBC1D10C	Patient 2_Preinfusion
1.01767e-165	0.600665	0.657	0.312	2.03534e-162	CD8 T	TBC1D10C	Patient 2_Day 31
5.5215e-48	0.306713	0.276	0.092	1.1043e-44	CD8 T	TBC1D10C	Patient 3_Preinfusion
9.6129e-132	0.222638	0.316	0.147	1.92258e-128	CD8 T	TBC1D10C	Patient 3_Day 24
1.01617e-31	0.279432	0.213	0.105	2.03235e-28	CD8 T	TBC1D10C	Patient 4_Preinfusion
2.48726e-77	0.561007	0.398	0.176	4.97451e-74	CD8 T	TBC1D10C	Patient 4_Day 8
2.23942e-06	0.257176	0.333	0.217	0.00447883	NK	TBC1D10C	Patient 4_Day 8
8.16036e-171	0.496729	0.591	0.31	1.63207e-167	CD8 T	TBC1D10C	Patient 4_Day 21
6.2391e-08	0.215395	0.451	0.411	0.000124782	Gamma Delta T	TBC1D10C	Patient 4_Day 21
3.6879e-15	0.237324	0.488	0.407	7.3758e-12	NK	TBC1D10C	Patient 4_Day 21
0	0.883968	0.961	0.421	0	Monocytes	TALDO1	Healthy
1.87206e-173	1.49603	0.835	0.594	3.74411e-170	Megakaryocytes	TALDO1	Healthy
8.049e-272	0.575401	0.949	0.555	1.6098e-268	Monocytes	TALDO1	Patient 1_Preinfusion
3.60898e-53	1.04184	0.772	0.841	7.21796e-50	Megakaryocytes	TALDO1	Patient 1_Preinfusion
1.10978e-18	0.324225	0.971	0.474	2.21956e-15	DC	TALDO1	Patient 1_Day 7
0	0.959534	0.924	0.356	0	Monocytes	TALDO1	Patient 1_Day 7
1.51458e-16	1.1846	0.731	0.479	3.02915e-13	Megakaryocytes	TALDO1	Patient 1_Day 7
8.10541e-09	0.225818	0.833	0.248	1.62108e-05	DC	TALDO1	Patient 1_Day 13
2.38977e-100	0.500733	0.757	0.186	4.77953e-97	Monocytes	TALDO1	Patient 1_Day 13
2.61344e-06	1.16336	0.75	0.251	0.00522687	Megakaryocytes	TALDO1	Patient 1_Day 13
2.36829e-108	0.644962	0.866	0.511	4.73657e-105	Monocytes	TALDO1	Patient 2_Preinfusion
2.9435e-10	0.889957	0.556	0.8	5.88701e-07	Megakaryocytes	TALDO1	Patient 2_Preinfusion
6.92157e-204	0.649324	0.87	0.402	1.38431e-200	Monocytes	TALDO1	Patient 2_Day 31
2.29475e-24	1.52455	1	0.558	4.5895e-21	Megakaryocytes	TALDO1	Patient 2_Day 31
0	0.411441	0.765	0.405	0	Monocytes	TALDO1	Patient 3_Preinfusion
9.90088e-164	2.07703	0.9	0.669	1.98018e-160	Megakaryocytes	TALDO1	Patient 3_Preinfusion
1.23677e-37	0.200119	0.867	0.387	2.47355e-34	DC	TALDO1	Patient 3_Day 24
0	0.424493	0.661	0.29	0	Monocytes	TALDO1	Patient 3_Day 24
1.09353e-09	0.976368	0.5	0.392	2.18706e-06	Megakaryocytes	TALDO1	Patient 3_Day 24
0	0.626813	0.801	0.291	0	Monocytes	TALDO1	Patient 4_Preinfusion
2.62721e-68	1.04035	0.732	0.581	5.25443e-65	Megakaryocytes	TALDO1	Patient 4_Preinfusion
0	0.713476	0.948	0.443	1.07289e-305	Monocytes	TALDO1	Patient 4_Day 8
9.67031e-61	1.59942	0.895	0.777	1.93406e-57	Megakaryocytes	TALDO1	Patient 4_Day 8
0	0.723566	0.952	0.519	0	Monocytes	TALDO1	Patient 4_Day 21
6.95499e-42	1.7943	0.85	0.712	1.391e-38	Megakaryocytes	TALDO1	Patient 4_Day 21
1.24493e-35	0.44659	0.988	0.662	2.48985e-32	DC	TAGLN2	Healthy
0	2.94052	1	0.663	0	Megakaryocytes	TAGLN2	Healthy
4.14284e-224	2.46318	0.982	0.771	8.28569e-221	Megakaryocytes	TAGLN2	Patient 1_Preinfusion
4.06859e-189	0.33718	0.846	0.421	8.13719e-186	Monocytes	TAGLN2	Patient 1_Day 7
1.66911e-63	1.96432	0.923	0.512	3.33822e-60	Megakaryocytes	TAGLN2	Patient 1_Day 7
1.65249e-06	0.223119	0.833	0.325	0.00330498	DC	TAGLN2	Patient 1_Day 13
4.50683e-10	1.62745	0.75	0.327	9.01366e-07	Megakaryocytes	TAGLN2	Patient 1_Day 13
1.35396e-09	0.249899	0.988	0.74	2.70792e-06	DC	TAGLN2	Patient 2_Preinfusion
4.67816e-48	2.42905	1	0.745	9.35631e-45	Megakaryocytes	TAGLN2	Patient 2_Preinfusion
2.73713e-07	0.421699	0.953	0.622	0.000547426	DC	TAGLN2	Patient 2_Day 31
3.50449e-09	0.263296	0.821	0.617	7.00898e-06	CD4 T	TAGLN2	Patient 2_Day 31
5.33915e-65	2.39411	1	0.625	1.06783e-61	Megakaryocytes	TAGLN2	Patient 2_Day 31
0	2.81724	1	0.616	0	Megakaryocytes	TAGLN2	Patient 3_Preinfusion
9.53925e-25	1.40205	0.8	0.433	1.90785e-21	Megakaryocytes	TAGLN2	Patient 3_Day 24
4.64512615169607e-318	2.10141	0.939	0.557	9.29025230339213e-315	Megakaryocytes	TAGLN2	Patient 4_Preinfusion
5.90056e-217	2.79308	0.974	0.712	1.18011e-213	Megakaryocytes	TAGLN2	Patient 4_Day 8
2.28486e-115	2.88246	1	0.733	4.56972e-112	Megakaryocytes	TAGLN2	Patient 4_Day 21
2.09635e-08	0.672861	1	0.733	4.19269e-05	B cells	TAGLN2	Patient 4_Day 21
1.52295e-07	0.248372	0.346	0.11	0.00030459	Gamma Delta T	SYTL3	Healthy
8.25837e-69	0.384922	0.364	0.099	1.65167e-65	NK	SYTL3	Healthy
3.05445e-20	0.299024	0.21	0.067	6.1089e-17	CD8 T	SYTL3	Patient 1_Preinfusion
5.38262e-100	1.04438	0.39	0.159	1.07652e-96	CD8 T	SYTL3	Patient 1_Day 7
1.99971e-64	0.506571	0.389	0.057	3.99942e-61	CD8 T	SYTL3	Patient 2_Preinfusion
2.46088e-10	0.61559	0.405	0.086	4.92175e-07	NK	SYTL3	Patient 2_Preinfusion
2.36888e-46	0.255629	0.252	0.099	4.73776e-43	CD8 T	SYTL3	Patient 2_Day 31
1.71853e-06	0.225024	0.402	0.179	0.00343705	NK	SYTL3	Patient 2_Day 31
3.21782e-12	0.409769	0.273	0.045	6.43564e-09	Gamma Delta T	SYTL3	Patient 3_Preinfusion
5.77346e-22	0.488026	0.205	0.044	1.15469e-18	NK	SYTL3	Patient 3_Preinfusion
5.29335e-08	0.398662	0.262	0.086	0.000105867	Gamma Delta T	SYTL3	Patient 4_Preinfusion
1.80892e-08	0.409669	0.227	0.086	3.61784e-05	NK	SYTL3	Patient 4_Preinfusion
4.60783e-52	0.538108	0.242	0.06	9.21566e-49	CD8 T	SYTL3	Patient 4_Day 8
1.5735e-17	0.429992	0.333	0.087	3.147e-14	NK	SYTL3	Patient 4_Day 8
1.04444e-52	0.264944	0.254	0.11	2.08888e-49	CD8 T	SYTL3	Patient 4_Day 21
1.68596e-20	0.468187	0.429	0.154	3.37192e-17	Gamma Delta T	SYTL3	Patient 4_Day 21
8.47566e-31	0.403973	0.355	0.15	1.69513e-27	NK	SYTL3	Patient 4_Day 21
2.7528e-137	0.359026	0.24	0.047	5.5056e-134	CD8 T	SYTL2	Healthy
9.94986e-10	0.288149	0.321	0.075	1.98997e-06	Gamma Delta T	SYTL2	Healthy
6.90213e-29	0.203927	0.231	0.069	1.38043e-25	NK	SYTL2	Healthy
1.15181e-57	0.293715	0.456	0.38	2.30362e-54	CD8 T	SYTL1	Healthy
7.3731e-08	0.341472	0.691	0.39	0.000147462	Gamma Delta T	SYTL1	Healthy
5.77035e-55	0.414578	0.66	0.378	1.15407e-51	NK	SYTL1	Healthy
1.8534e-70	0.373006	0.322	0.138	3.70679e-67	CD4 T	SYTL1	Patient 1_Preinfusion
1.94333e-17	0.304796	0.298	0.153	3.88666e-14	CD8 T	SYTL1	Patient 1_Preinfusion
9.26154e-16	0.217361	0.209	0.142	1.85231e-12	CD8 T	SYTL1	Patient 1_Day 7
6.81281e-20	0.378496	0.438	0.145	1.36256e-16	CD4 T	SYTL1	Patient 2_Preinfusion
3.84889e-31	0.345908	0.345	0.139	7.69779e-28	CD8 T	SYTL1	Patient 2_Preinfusion
4.56776e-14	0.653224	0.459	0.156	9.13552e-11	NK	SYTL1	Patient 2_Preinfusion
2.58968e-54	0.296394	0.358	0.217	5.17936e-51	CD8 T	SYTL1	Patient 2_Day 31
2.26286e-28	0.286839	0.247	0.145	4.52571e-25	CD8 T	SYTL1	Patient 4_Day 8
1.26382e-22	0.516389	0.405	0.155	2.52764e-19	NK	SYTL1	Patient 4_Day 8
4.54483e-25	1.15138	0.24	0.002	9.08967e-22	Megakaryocytes	SYNM	Patient 3_Preinfusion
0	1.05544	0.729	0.242	0	CD8 T	SYNE2	Healthy
9.5796e-17	0.370549	0.778	0.316	1.91592e-13	Gamma Delta T	SYNE2	Healthy
4.26773e-60	0.43959	0.658	0.302	8.53547e-57	NK	SYNE2	Healthy
1.10389e-261	1.0107	0.66	0.073	2.20777e-258	CD4 T	SYNE2	Patient 1_Preinfusion
2.02206e-143	1.21266	0.695	0.112	4.04412e-140	CD8 T	SYNE2	Patient 1_Preinfusion
4.06361e-06	1.15121	0.769	0.158	0.00812722	Gamma Delta T	SYNE2	Patient 1_Preinfusion
6.14899e-272	1.38648	0.707	0.269	1.2298e-268	CD8 T	SYNE2	Patient 1_Day 7
2.34321e-30	0.297731	0.526	0.284	4.68641e-27	CD8 T	SYNE2	Patient 1_Day 13
5.22144e-101	1.16836	0.862	0.102	1.04429e-97	CD4 T	SYNE2	Patient 2_Preinfusion
5.99877e-202	1.34075	0.824	0.064	1.19975e-198	CD8 T	SYNE2	Patient 2_Preinfusion
5.68215e-17	1.15136	0.757	0.132	1.13643e-13	NK	SYNE2	Patient 2_Preinfusion
0	1.101	0.861	0.2	0	CD8 T	SYNE2	Patient 2_Day 31
1.79866e-246	0.438523	0.382	0.049	3.59732e-243	CD4 T	SYNE2	Patient 3_Preinfusion
8.84006e-213	0.947324	0.473	0.06	1.76801e-209	CD8 T	SYNE2	Patient 3_Preinfusion
7.2425e-09	0.309761	0.338	0.087	1.4485e-05	Gamma Delta T	SYNE2	Patient 3_Preinfusion
1.56377e-10	0.504855	0.27	0.087	3.12755e-07	NK	SYNE2	Patient 3_Preinfusion
0	0.590927	0.508	0.214	0	CD8 T	SYNE2	Patient 3_Day 24
6.22918e-193	1.40193	0.503	0.125	1.24584e-189	CD8 T	SYNE2	Patient 4_Preinfusion
1.39537e-07	0.396962	0.446	0.161	0.000279074	Gamma Delta T	SYNE2	Patient 4_Preinfusion
4.82629e-30	0.344945	0.688	0.2	9.65257e-27	CD4 T	SYNE2	Patient 4_Day 8
2.59868e-265	1.43656	0.699	0.085	5.19736e-262	CD8 T	SYNE2	Patient 4_Day 8
1.03709e-10	0.592532	0.718	0.209	2.07418e-07	Gamma Delta T	SYNE2	Patient 4_Day 8
2.87428e-44	0.647948	0.708	0.191	5.74856e-41	NK	SYNE2	Patient 4_Day 8
5.3448e-58	0.236883	0.718	0.359	1.06896e-54	CD4 T	SYNE2	Patient 4_Day 21
0	0.838722	0.726	0.194	0	CD8 T	SYNE2	Patient 4_Day 21
5.57128e-10	0.338727	0.611	0.381	1.11426e-06	Gamma Delta T	SYNE2	Patient 4_Day 21
5.09741e-14	0.322154	0.547	0.377	1.01948e-10	NK	SYNE2	Patient 4_Day 21
7.69633e-59	0.817033	0.629	0.521	1.53927e-55	CD8 T	SYNE2	Patient 3_Day 24 CAR T
9.89029e-08	0.459064	0.843	0.816	0.000197806	CD8 T	SYNE2	Patient 4_Day 8 CAR T
6.74516e-124	0.530777	0.471	0.274	1.34903e-120	CD8 T	SYNE1	Healthy
4.11587e-12	0.382354	0.691	0.302	8.23174e-09	Gamma Delta T	SYNE1	Healthy
1.42533e-80	0.51228	0.664	0.286	2.85067e-77	NK	SYNE1	Healthy
3.4105e-21	0.441765	0.355	0.203	6.82101e-18	CD8 T	SYNE1	Patient 1_Preinfusion
3.4592e-08	1.05729	0.615	0.214	6.9184e-05	Gamma Delta T	SYNE1	Patient 1_Preinfusion
1.8197e-90	0.965014	0.428	0.201	3.63941e-87	CD8 T	SYNE1	Patient 1_Day 7
3.77191e-20	0.211061	0.326	0.156	7.54383e-17	CD8 T	SYNE1	Patient 1_Day 13
8.5828e-112	0.872055	0.668	0.164	1.71656e-108	CD8 T	SYNE1	Patient 2_Preinfusion
2.65917e-09	0.863662	0.568	0.21	5.31835e-06	NK	SYNE1	Patient 2_Preinfusion
1.67913e-188	0.767648	0.678	0.249	3.35826e-185	CD8 T	SYNE1	Patient 2_Day 31
4.80156e-15	0.241826	0.214	0.126	9.60312e-12	CD8 T	SYNE1	Patient 3_Preinfusion
1.05452e-145	0.351945	0.301	0.131	2.10903e-142	CD8 T	SYNE1	Patient 3_Day 24
8.29872e-08	0.456696	0.213	0.115	0.000165974	NK	SYNE1	Patient 4_Preinfusion
4.18636e-95	0.915257	0.526	0.212	8.37272e-92	CD8 T	SYNE1	Patient 4_Day 8
7.39168e-18	0.496604	0.577	0.264	1.47834e-14	NK	SYNE1	Patient 4_Day 8
2.85958e-163	0.5272	0.469	0.167	5.71915e-160	CD8 T	SYNE1	Patient 4_Day 21
1.2886e-06	0.276595	0.406	0.273	0.00257721	Gamma Delta T	SYNE1	Patient 4_Day 21
5.25761e-22	0.362159	0.464	0.264	1.05152e-18	NK	SYNE1	Patient 4_Day 21
5.5021e-38	0.648148	0.432	0.35	1.10042e-34	CD8 T	SYNE1	Patient 3_Day 24 CAR T
7.30053e-112	0.238746	0.418	0.199	1.46011e-108	CD4 T	SVIP	Healthy
5.62456e-137	1.2719	0.461	0.259	1.12491e-133	Megakaryocytes	SVIP	Healthy
1.3924e-67	0.440464	0.343	0.094	2.78479e-64	CD4 T	SVIP	Patient 1_Preinfusion
1.98526e-17	0.348231	0.282	0.117	3.97053e-14	CD8 T	SVIP	Patient 1_Preinfusion
5.89057e-59	1.69001	0.561	0.125	1.17811e-55	Megakaryocytes	SVIP	Patient 1_Preinfusion
2.69556e-42	1.72871	0.731	0.117	5.39112e-39	Megakaryocytes	SVIP	Patient 1_Day 7
5.46806e-08	1.22877	0.75	0.12	0.000109361	Megakaryocytes	SVIP	Patient 1_Day 13
7.09202e-18	0.237043	0.325	0.074	1.4184e-14	CD4 T	SVIP	Patient 2_Preinfusion
2.22945e-46	2.87441	1	0.084	4.45889e-43	Megakaryocytes	SVIP	Patient 2_Preinfusion
8.24542e-36	1.93109	0.833	0.111	1.64908e-32	Megakaryocytes	SVIP	Patient 2_Day 31
1.01431e-103	2.19564	0.6	0.069	2.02862e-100	Megakaryocytes	SVIP	Patient 3_Preinfusion
1.36894e-12	1.5888	0.45	0.076	2.73789e-09	Megakaryocytes	SVIP	Patient 3_Day 24
4.56404e-145	1.76592	0.72	0.096	9.12808e-142	Megakaryocytes	SVIP	Patient 4_Preinfusion
3.2265e-13	0.245221	0.277	0.051	6.453e-10	CD4 T	SVIP	Patient 4_Day 8
1.25494e-64	2.01884	0.5	0.053	2.50989e-61	Megakaryocytes	SVIP	Patient 4_Day 8
3.37639e-93	2.5584	0.65	0.109	6.75278e-90	Megakaryocytes	SVIP	Patient 4_Day 21
2.84199e-08	0.536137	0.636	0.109	5.68399e-05	B cells	SVIP	Patient 4_Day 21
0	1.04984	0.934	0.224	0	Monocytes	STXBP2	Healthy
1.94859e-73	1.12028	0.626	0.452	3.89718e-70	Megakaryocytes	STXBP2	Healthy
1.46507e-258	0.564395	0.785	0.261	2.93014e-255	Monocytes	STXBP2	Patient 1_Preinfusion
1.45723e-51	1.0209	0.509	0.642	2.91446e-48	Megakaryocytes	STXBP2	Patient 1_Preinfusion
0	0.595726	0.739	0.117	0	Monocytes	STXBP2	Patient 1_Day 7
8.6297e-07	0.729544	0.462	0.251	0.00172594	Megakaryocytes	STXBP2	Patient 1_Day 7
1.47811e-137	0.767652	0.781	0.281	2.95622e-134	Monocytes	STXBP2	Patient 2_Preinfusion
1.59838e-07	0.258088	0.5	0.083	0.000319677	Monocytes	STXBP2	Patient 2_Day 24
0	0.903917	0.828	0.185	0	Monocytes	STXBP2	Patient 2_Day 31
2.86146e-06	0.919059	0.833	0.399	0.00572291	Megakaryocytes	STXBP2	Patient 2_Day 31
0	0.579254	0.599	0.175	0	Monocytes	STXBP2	Patient 3_Preinfusion
4.64523e-49	1.26862	0.58	0.487	9.29045e-46	Megakaryocytes	STXBP2	Patient 3_Preinfusion
0	0.427798	0.478	0.1	0	Monocytes	STXBP2	Patient 3_Day 24
0	0.644175	0.668	0.129	0	Monocytes	STXBP2	Patient 4_Preinfusion
6.22259e-26	0.68102	0.451	0.436	1.24452e-22	Megakaryocytes	STXBP2	Patient 4_Preinfusion
2.76594e-247	0.5693	0.787	0.22	5.53187e-244	Monocytes	STXBP2	Patient 4_Day 8
5.31015e-49	1.3701	0.632	0.596	1.06203e-45	Megakaryocytes	STXBP2	Patient 4_Day 8
0	0.746789	0.828	0.263	0	Monocytes	STXBP2	Patient 4_Day 21
7.18672e-33	1.69519	0.85	0.515	1.43734e-29	Megakaryocytes	STXBP2	Patient 4_Day 21
1.89053e-136	0.259443	0.348	0.131	3.78106e-133	CD4 T	STMN3	Healthy
4.19217e-09	0.204488	0.223	0.049	8.38433e-06	CD4 T	STMN3	Patient 4_Day 8
1.99352e-36	0.203083	0.227	0.127	3.98703e-33	B cells	STMN1	Healthy
6.13587e-113	1.17564	0.322	0.026	1.22717e-109	CD8 T	STMN1	Patient 1_Preinfusion
2.83461e-74	1.23185	0.27	0.016	5.66923e-71	CD8 T	STMN1	Patient 2_Preinfusion
1.10827e-302	0.979865	0.368	0.028	2.21654e-299	CD8 T	STMN1	Patient 3_Preinfusion
6.81773e-218	0.42722	0.237	0.07	1.36355e-214	CD8 T	STMN1	Patient 3_Day 24
1.48512e-76	0.679265	0.218	0.037	2.97025e-73	CD8 T	STMN1	Patient 4_Day 8
1.24143e-133	0.702809	0.256	0.073	2.48285e-130	CD8 T	STMN1	Patient 4_Day 21
9.03459e-14	1.03759	0.864	0.137	1.80692e-10	B cells	STMN1	Patient 4_Day 21
9.81458e-32	0.732793	0.7	0.452	1.96292e-28	CD8 T	STMN1	Patient 1_Product
1.69294e-23	0.51983	0.454	0.196	3.38588e-20	CD8 T	STMN1	Patient 2_Product
8.02172e-12	0.410045	0.718	0.55	1.60434e-08	CD8 T	STMN1	Patient 3_Product
1.83895e-20	0.418124	0.762	0.35	3.67789e-17	DC	STMN1	Patient 3_Day 24 CAR T
3.49802e-46	0.240449	0.352	0.367	6.99604e-43	CD8 T	STMN1	Patient 3_Day 24 CAR T
6.03764e-24	0.455348	0.636	0.444	1.20753e-20	CD8 T	STMN1	Patient 4_Product
4.23046e-06	0.284305	0.635	0.76	0.00846093	CD8 T	STMN1	Patient 4_Day 8 CAR T
1.75806e-88	0.201445	0.576	0.362	3.51613e-85	CD4 T	STK17A	Healthy
2.33291e-53	0.302286	0.573	0.394	4.66583e-50	CD8 T	STK17A	Healthy
4.64098e-07	0.290822	0.716	0.42	0.000928196	Gamma Delta T	STK17A	Healthy
3.8195e-61	0.316845	0.563	0.398	7.639e-58	B cells	STK17A	Healthy
2.16207e-45	0.373815	0.708	0.408	4.32413e-42	NK	STK17A	Healthy
1.4999e-138	0.721549	0.623	0.222	2.99979e-135	CD4 T	STK17A	Patient 1_Preinfusion
2.90754e-107	1.06107	0.692	0.245	5.81508e-104	CD8 T	STK17A	Patient 1_Preinfusion
1.61544e-81	0.699931	0.522	0.321	3.23088e-78	CD8 T	STK17A	Patient 1_Day 7
1.10022e-31	0.457653	0.506	0.115	2.20044e-28	CD4 T	STK17A	Patient 2_Preinfusion
6.26695e-60	0.527484	0.433	0.102	1.25339e-56	CD8 T	STK17A	Patient 2_Preinfusion
1.97584e-156	0.566391	0.539	0.157	3.95167e-153	CD8 T	STK17A	Patient 2_Day 31
2.58928e-120	0.350582	0.327	0.101	5.17856e-117	CD4 T	STK17A	Patient 3_Preinfusion
7.6594e-78	0.461395	0.369	0.11	1.53188e-74	CD8 T	STK17A	Patient 3_Preinfusion
8.96498e-07	0.326133	0.325	0.127	0.001793	Gamma Delta T	STK17A	Patient 3_Preinfusion
1.21317e-15	0.417649	0.287	0.126	2.42633e-12	NK	STK17A	Patient 3_Preinfusion
0	0.413236	0.463	0.183	6.10366e-306	CD8 T	STK17A	Patient 3_Day 24
1.38338380835549e-322	0.49006	0.518	0.152	2.76676761671098e-319	CD4 T	STK17A	Patient 4_Preinfusion
1.91129e-73	0.561117	0.471	0.228	3.82257e-70	CD8 T	STK17A	Patient 4_Preinfusion
1.10878e-23	0.60913	0.741	0.277	2.21755e-20	CD4 T	STK17A	Patient 4_Day 8
5.15458e-154	0.91248	0.607	0.206	1.03092e-150	CD8 T	STK17A	Patient 4_Day 8
6.45272e-21	0.521888	0.613	0.276	1.29054e-17	NK	STK17A	Patient 4_Day 8
3.26482e-296	0.71264	0.702	0.289	6.52964e-293	CD8 T	STK17A	Patient 4_Day 21
3.54553e-08	0.289506	0.617	0.434	7.09106e-05	Gamma Delta T	STK17A	Patient 4_Day 21
1.15695e-38	0.4883	0.693	0.422	2.31391e-35	NK	STK17A	Patient 4_Day 21
6.18742e-19	0.261675	0.774	0.788	1.23748e-15	CD8 T	STK17A	Patient 3_Day 24 CAR T
0	0.288144	0.265	0.006	0	Monocytes	STEAP4	Healthy
1.49707e-109	0.389057	0.325	0.113	2.99413e-106	CD8 T	STAT4	Healthy
4.11409e-20	0.415154	0.593	0.143	8.22817e-17	Gamma Delta T	STAT4	Healthy
6.12471e-72	0.443546	0.461	0.13	1.22494e-68	NK	STAT4	Healthy
1.08214e-14	0.25287	0.219	0.038	2.16428e-11	CD4 T	STAT4	Patient 2_Preinfusion
4.02561e-48	0.35551	0.257	0.024	8.05123e-45	CD8 T	STAT4	Patient 2_Preinfusion
8.94026e-73	0.332333	0.286	0.065	1.78805e-69	CD8 T	STAT4	Patient 2_Day 31
2.58046e-06	0.444649	0.333	0.062	0.00516093	Gamma Delta T	STAT4	Patient 4_Day 8
3.68704e-11	0.370274	0.22	0.057	7.37408e-08	NK	STAT4	Patient 4_Day 8
1.85213e-15	0.243753	0.227	0.098	3.70425e-12	NK	STAT4	Patient 4_Day 21
3.38955e-191	0.388909	0.941	0.581	6.77909e-188	Monocytes	STAT1	Patient 1_Preinfusion
1.03798e-54	0.42022	0.671	0.811	2.07595e-51	CD8 T	STAT1	Patient 1_Day 7
7.36449e-45	0.381517	0.827	0.583	1.4729e-41	Monocytes	STAT1	Patient 2_Preinfusion
7.93164e-70	0.243349	0.853	0.565	1.58633e-66	Monocytes	STAT1	Patient 2_Day 31
1.79496e-25	0.442091	0.18	0.474	3.58993e-22	Megakaryocytes	STAT1	Patient 3_Preinfusion
1.01205e-279	0.352113	0.631	0.281	2.0241e-276	Monocytes	STAT1	Patient 4_Preinfusion
2.66994e-77	0.244245	0.676	0.741	5.33988e-74	CD8 T	STAT1	Patient 4_Day 21
1.71908e-10	0.228501	0.576	0.555	3.43816e-07	CD8 T	STAT1	Patient 3_Day 24 CAR T
1.41893e-07	0.344024	0.61	0.43	0.000283786	Monocytes	STAT1	Patient 4_Product
5.61296e-69	0.82587	0.235	0.04	1.12259e-65	Megakaryocytes	SSX2IP	Healthy
3.33611e-09	1.39799	0.333	0.023	6.67221e-06	Megakaryocytes	SSX2IP	Patient 2_Preinfusion
1.43017e-10	0.937357	0.5	0.036	2.86034e-07	Megakaryocytes	SSX2IP	Patient 2_Day 31
5.05233e-52	1.53683	0.34	0.02	1.01047e-48	Megakaryocytes	SSX2IP	Patient 3_Preinfusion
6.58924e-46	0.912913	0.293	0.015	1.31785e-42	Megakaryocytes	SSX2IP	Patient 4_Preinfusion
1.14981e-14	0.992652	0.237	0.039	2.29962e-11	Megakaryocytes	SSX2IP	Patient 4_Day 8
1.53909e-26	1.37601	0.4	0.046	3.07817e-23	Megakaryocytes	SSX2IP	Patient 4_Day 21
8.71553e-153	0.480887	0.88	0.832	1.74311e-149	CD8 T	SRSF7	Healthy
4.56991e-72	0.376209	0.536	0.437	9.13982e-69	CD4 T	SRSF7	Patient 1_Preinfusion
4.92344e-112	0.722891	0.615	0.438	9.84688e-109	CD8 T	SRSF7	Patient 1_Preinfusion
2.82511e-124	1.12687	0.692	0.572	5.65021e-121	CD8 T	SRSF7	Patient 1_Day 7
2.14632e-38	0.371414	0.565	0.38	4.29263e-35	CD8 T	SRSF7	Patient 1_Day 13
1.63664e-28	0.543009	0.819	0.445	3.27328e-25	CD4 T	SRSF7	Patient 2_Preinfusion
1.63093e-133	0.913113	0.796	0.427	3.26187e-130	CD8 T	SRSF7	Patient 2_Preinfusion
4.62825e-06	0.51721	0.649	0.462	0.0092565	NK	SRSF7	Patient 2_Preinfusion
1.30069e-160	0.564301	0.8	0.653	2.60137e-157	CD8 T	SRSF7	Patient 2_Day 31
8.46728e-100	0.488929	0.505	0.316	1.69346e-96	CD8 T	SRSF7	Patient 3_Preinfusion
7.18832e-14	0.223291	0.311	0.33	1.43766e-10	NK	SRSF7	Patient 3_Preinfusion
1.65024e-71	0.253214	0.476	0.399	3.30048e-68	CD8 T	SRSF7	Patient 3_Day 24
2.36294e-78	0.203925	0.453	0.315	4.72588e-75	CD4 T	SRSF7	Patient 4_Preinfusion
6.15757e-121	0.659966	0.494	0.337	1.23151e-117	CD8 T	SRSF7	Patient 4_Preinfusion
1.27527e-176	0.9526	0.654	0.497	2.55054e-173	CD8 T	SRSF7	Patient 4_Day 8
3.62644e-24	0.540379	0.75	0.519	7.25287e-21	NK	SRSF7	Patient 4_Day 8
2.57245e-144	0.346623	0.663	0.631	5.14491e-141	CD8 T	SRSF7	Patient 4_Day 21
1.24587e-14	0.26382	0.651	0.642	2.49174e-11	Gamma Delta T	SRSF7	Patient 4_Day 21
2.72454e-27	0.280165	0.59	0.629	5.44907e-24	CD8 T	SRSF7	Patient 3_Day 24 CAR T
5.86936e-102	0.429426	0.657	0.683	1.17387e-98	CD8 T	SRSF11	Healthy
2.68685e-31	0.308626	0.502	0.527	5.3737e-28	CD8 T	SRSF11	Patient 1_Preinfusion
2.88758e-57	0.776048	0.348	0.413	5.77515e-54	CD8 T	SRSF11	Patient 1_Day 7
1.07251e-06	0.247561	0.335	0.31	0.00214503	CD8 T	SRSF11	Patient 3_Preinfusion
8.00546e-61	0.313664	0.363	0.275	1.60109e-57	CD8 T	SRSF11	Patient 3_Day 24
7.31254e-74	0.612961	0.335	0.319	1.46251e-70	CD8 T	SRSF11	Patient 4_Preinfusion
5.81624e-99	0.663679	0.462	0.462	1.16325e-95	CD8 T	SRSF11	Patient 4_Day 8
1.60611e-10	0.253865	0.446	0.463	3.21221e-07	NK	SRSF11	Patient 4_Day 8
1.31312e-36	0.664832	0.553	0.503	2.62625e-33	CD8 T	SRSF11	Patient 3_Day 24 CAR T
0	1.29078	0.998	0.613	0	Monocytes	SRGN	Healthy
6.57245e-87	1.56713	0.948	0.736	1.31449e-83	Megakaryocytes	SRGN	Healthy
5.63362e-60	0.270057	0.975	0.726	1.12672e-56	NK	SRGN	Healthy
0	0.674892	0.991	0.692	0	Monocytes	SRGN	Patient 1_Preinfusion
1.19453e-34	0.890216	0.842	0.91	2.38905e-31	Megakaryocytes	SRGN	Patient 1_Preinfusion
5.92043e-270	0.587846	0.976	0.782	1.18409e-266	Monocytes	SRGN	Patient 1_Day 7
7.80141e-07	0.244701	0.914	0.848	0.00156028	Gamma Delta T	SRGN	Patient 1_Day 13
2.57279e-06	0.90169	0.5	0.851	0.00514559	Megakaryocytes	SRGN	Patient 1_Day 13
2.69792e-173	0.657218	0.989	0.882	5.39585e-170	Monocytes	SRGN	Patient 2_Preinfusion
5.75315e-184	0.538047	0.988	0.885	1.15063e-180	Monocytes	SRGN	Patient 2_Day 31
4.43688e-17	1.37917	1	0.919	8.87376e-14	Megakaryocytes	SRGN	Patient 2_Day 31
3.33905e-06	0.247748	0.961	0.918	0.0066781	NK	SRGN	Patient 2_Day 31
0	0.827508	0.985	0.647	0	Monocytes	SRGN	Patient 3_Preinfusion
2.91436e-48	1.33899	0.92	0.895	5.82872e-45	Megakaryocytes	SRGN	Patient 3_Preinfusion
6.19461e-25	0.322701	0.987	0.659	1.23892e-21	DC	SRGN	Patient 3_Day 24
0	0.447528	0.889	0.577	0	Monocytes	SRGN	Patient 3_Day 24
2.80586e-56	0.305093	0.676	0.662	5.61171e-53	NK	SRGN	Patient 3_Day 24
0	1.10323	0.995	0.687	0	Monocytes	SRGN	Patient 4_Preinfusion
2.46791e-136	0.307436	0.991	0.798	4.93581e-133	Monocytes	SRGN	Patient 4_Day 8
6.52938e-63	1.37678	0.789	0.927	1.30588e-59	Megakaryocytes	SRGN	Patient 4_Day 8
9.4129e-243	0.404353	0.991	0.855	1.88258e-239	Monocytes	SRGN	Patient 4_Day 21
3.49535e-22	1.37749	0.8	0.916	6.9907e-19	Megakaryocytes	SRGN	Patient 4_Day 21
1.57845e-13	0.213208	0.928	0.915	3.15691e-10	NK	SRGN	Patient 4_Day 21
5.42034e-26	0.220262	0.614	0.586	1.08407e-22	CD4 T	SRGN	Patient 3_Day 24 CAR T
1.92853e-34	0.245019	0.782	0.575	3.85705e-31	Gamma Delta T	SRGN	Patient 3_Day 24 CAR T
3.76518e-77	0.818077	0.266	0.414	7.53035e-74	CD8 T	SREK1	Patient 1_Day 7
9.42206e-59	0.501004	0.26	0.301	1.88441e-55	CD8 T	SREK1	Patient 4_Preinfusion
2.828e-59	0.317398	0.372	0.517	5.65599e-56	CD8 T	SREK1	Patient 4_Day 8
9.65528e-31	0.627769	0.425	0.39	1.93106e-27	CD8 T	SREK1	Patient 3_Day 24 CAR T
3.55172e-60	1.08587	0.252	0.002	7.10344e-57	Megakaryocytes	SPX	Healthy
1.62195e-33	1.20308	0.316	0.004	3.24389e-30	Megakaryocytes	SPX	Patient 1_Preinfusion
3.80109e-14	0.532832	0.231	0	7.60218e-11	Megakaryocytes	SPX	Patient 1_Day 7
7.2446e-09	0.849193	0.333	0	1.44892e-05	Megakaryocytes	SPX	Patient 2_Preinfusion
1.58881e-19	1.02856	0.583	0	3.17762e-16	Megakaryocytes	SPX	Patient 2_Day 31
4.06e-28	1.16919	0.28	0.002	8.12e-25	Megakaryocytes	SPX	Patient 3_Preinfusion
5.41038e-13	0.475857	0.25	0	1.08208e-09	Megakaryocytes	SPX	Patient 3_Day 24
7.22829e-26	0.574134	0.207	0.006	1.44566e-22	Megakaryocytes	SPX	Patient 4_Preinfusion
3.0916e-19	1.20211	0.237	0.001	6.18319e-16	Megakaryocytes	SPX	Patient 4_Day 8
3.21654e-20	1.6277	0.4	0	6.43308e-17	Megakaryocytes	SPX	Patient 4_Day 21
2.09838e-39	0.261001	0.217	0.115	4.19675e-36	CD4 T	SPTBN1	Patient 1_Preinfusion
1.14779e-12	0.274716	0.24	0.12	2.29558e-09	CD8 T	SPTBN1	Patient 1_Preinfusion
6.76027e-11	0.248779	0.219	0.071	1.35205e-07	CD4 T	SPTBN1	Patient 2_Preinfusion
1.92625e-07	0.256478	0.259	0.082	0.00038525	CD4 T	SPTBN1	Patient 4_Day 8
4.52634e-72	0.306661	0.431	0.303	9.05268e-69	CD8 T	SPTAN1	Healthy
2.51311e-82	0.438374	0.44	0.223	5.02622e-79	CD4 T	SPTAN1	Patient 1_Preinfusion
1.72793e-30	0.426243	0.418	0.241	3.45586e-27	CD8 T	SPTAN1	Patient 1_Preinfusion
5.9228e-07	0.795841	0.462	0.254	0.00118456	Gamma Delta T	SPTAN1	Patient 1_Preinfusion
4.77159e-32	0.588954	0.285	0.202	9.54318e-29	CD8 T	SPTAN1	Patient 1_Day 7
1.03982e-19	0.383788	0.488	0.171	2.07964e-16	CD4 T	SPTAN1	Patient 2_Preinfusion
1.25583e-28	0.36023	0.379	0.166	2.51166e-25	CD8 T	SPTAN1	Patient 2_Preinfusion
2.23017e-06	0.504343	0.324	0.185	0.00446034	NK	SPTAN1	Patient 2_Preinfusion
7.95491e-61	0.303761	0.372	0.24	1.59098e-57	CD8 T	SPTAN1	Patient 2_Day 31
6.45238e-26	0.25797	0.215	0.097	1.29048e-22	CD8 T	SPTAN1	Patient 3_Preinfusion
1.64215e-69	0.652583	0.287	0.123	3.28429e-66	CD8 T	SPTAN1	Patient 4_Preinfusion
1.03667e-07	0.303186	0.455	0.226	0.000207334	CD4 T	SPTAN1	Patient 4_Day 8
2.95473e-62	0.636071	0.372	0.196	5.90946e-59	CD8 T	SPTAN1	Patient 4_Day 8
3.26431e-19	0.206417	0.491	0.286	6.52861e-16	CD4 T	SPTAN1	Patient 4_Day 21
9.27502e-64	0.336089	0.382	0.256	1.855e-60	CD8 T	SPTAN1	Patient 4_Day 21
3.15539e-43	1.20825	0.741	0.096	6.31079e-40	Gamma Delta T	SPON2	Healthy
0	1.90722	0.837	0.062	0	NK	SPON2	Healthy
3.3684e-43	0.442769	0.302	0.151	6.73679e-40	CD8 T	SPON2	Patient 1_Day 7
3.96346e-32	0.201267	0.485	0.228	7.92691e-29	Gamma Delta T	SPON2	Patient 1_Day 7
6.88952e-11	0.697951	0.525	0.244	1.3779e-07	NK	SPON2	Patient 1_Day 7
1.17898e-08	0.446856	0.373	0.171	2.35796e-05	NK	SPON2	Patient 1_Day 13
7.25089e-53	0.45693	0.304	0.029	1.45018e-49	CD8 T	SPON2	Patient 2_Preinfusion
2.13954e-46	1.8126	0.784	0.048	4.27907e-43	NK	SPON2	Patient 2_Preinfusion
1.49017e-66	0.21299	0.282	0.071	2.98033e-63	CD8 T	SPON2	Patient 2_Day 31
3.01249e-06	0.78538	0.458	0.189	0.00602498	Gamma Delta T	SPON2	Patient 2_Day 31
5.89042e-44	1.11531	0.618	0.178	1.17808e-40	NK	SPON2	Patient 2_Day 31
7.19214e-15	0.474608	0.26	0.026	1.43843e-11	Gamma Delta T	SPON2	Patient 3_Preinfusion
1.33618e-79	1.23612	0.426	0.023	2.67236e-76	NK	SPON2	Patient 3_Preinfusion
1.43827e-25	0.403965	0.325	0.126	2.87654e-22	Gamma Delta T	SPON2	Patient 3_Day 24
1.51554e-168	0.805732	0.407	0.115	3.03107e-165	NK	SPON2	Patient 3_Day 24
2.906e-17	0.655289	0.246	0.021	5.81201e-14	Gamma Delta T	SPON2	Patient 4_Preinfusion
4.54497e-25	0.78156	0.253	0.021	9.08994e-22	NK	SPON2	Patient 4_Preinfusion
1.31343e-70	0.546731	0.279	0.044	2.62686e-67	CD8 T	SPON2	Patient 4_Day 8
2.0649e-09	0.902693	0.462	0.09	4.12981e-06	Gamma Delta T	SPON2	Patient 4_Day 8
1.80357e-37	0.778385	0.458	0.076	3.60714e-34	NK	SPON2	Patient 4_Day 8
1.42988e-137	0.358546	0.353	0.094	2.85977e-134	CD8 T	SPON2	Patient 4_Day 21
3.32728e-13	0.507761	0.411	0.182	6.65456e-10	Gamma Delta T	SPON2	Patient 4_Day 21
1.06694e-87	0.958054	0.536	0.166	2.13389e-84	NK	SPON2	Patient 4_Day 21
0	0.449489	0.638	0.217	0	CD4 T	SPOCK2	Healthy
1.59082e-192	0.58842	0.613	0.284	3.18165e-189	CD8 T	SPOCK2	Healthy
1.36691e-246	0.856324	0.576	0.048	2.73382e-243	CD4 T	SPOCK2	Patient 1_Preinfusion
1.03211e-71	0.664231	0.47	0.095	2.06423e-68	CD8 T	SPOCK2	Patient 1_Preinfusion
3.62045e-53	0.305015	0.565	0.141	7.2409e-50	CD4 T	SPOCK2	Patient 1_Day 7
5.25289e-113	0.888154	0.681	0.023	1.05058e-109	CD4 T	SPOCK2	Patient 2_Preinfusion
8.41099e-37	0.447734	0.66	0.181	1.6822e-33	CD4 T	SPOCK2	Patient 2_Day 31
4.69646e-54	0.315899	0.289	0.089	9.39292e-51	CD8 T	SPOCK2	Patient 2_Day 31
3.78914e-255	0.413049	0.313	0.023	7.57827e-252	CD4 T	SPOCK2	Patient 3_Preinfusion
1.38867e-63	0.442898	0.223	0.045	2.77735e-60	CD8 T	SPOCK2	Patient 3_Preinfusion
4.59507e-14	0.411217	0.351	0.055	9.19015e-11	Gamma Delta T	SPOCK2	Patient 3_Preinfusion
0	0.261953	0.387	0.057	0	CD4 T	SPOCK2	Patient 4_Preinfusion
3.2697e-85	0.968688	0.354	0.124	6.5394e-82	CD8 T	SPOCK2	Patient 4_Preinfusion
5.6609e-63	0.769574	0.652	0.045	1.13218e-59	CD4 T	SPOCK2	Patient 4_Day 8
1.87567e-133	0.578884	0.586	0.098	3.75134e-130	CD4 T	SPOCK2	Patient 4_Day 21
4.81122e-32	0.220241	0.206	0.097	9.62244e-29	CD8 T	SPOCK2	Patient 4_Day 21
2.61571e-42	0.372959	0.312	0.099	5.23141e-39	CD4 T	SPOCK2	Patient 3_Day 24 CAR T
4.26826e-09	1.69447	0.6	0.004	8.53652e-06	B cells	SPINK2	Patient 1_Preinfusion
0	1.08916	0.616	0.023	0	B cells	SPIB	Healthy
1.89659e-18	1.61816	1	0.003	3.79319e-15	B cells	SPIB	Patient 2_Day 31
3.88987e-40	1.12739	0.773	0.005	7.77974e-37	B cells	SPIB	Patient 4_Day 21
9.99252e-59	0.229307	0.237	0.201	1.9985e-55	CD8 T	SPATA13	Healthy
1.2205e-23	0.376683	0.252	0.194	2.441e-20	CD8 T	SPATA13	Patient 3_Day 24 CAR T
5.16549e-52	0.262835	0.202	0.056	1.0331e-48	CD8 T	SP4	Patient 2_Day 31
1.18148e-11	0.340423	0.847	0.701	2.36296e-08	CD4 T	SOS1	Patient 4_Product
2.98495e-73	0.262626	0.488	0.514	5.96991e-70	CD8 T	SORL1	Healthy
1.44998e-133	0.21356	0.311	0.06	2.89997e-130	Monocytes	SORL1	Patient 1_Day 7
3.90885e-06	0.430519	0.432	0.367	0.00781769	NK	SORL1	Patient 2_Preinfusion
8.99624e-123	0.280824	0.485	0.119	1.79925e-119	Monocytes	SORL1	Patient 4_Day 8
0	0.531671	0.711	0.199	0	Monocytes	SOD2	Healthy
5.611e-133	1.30463	0.557	0.363	1.1222e-129	Megakaryocytes	SOD2	Healthy
2.29074e-108	0.235639	0.594	0.251	4.58148e-105	Monocytes	SOD2	Patient 1_Preinfusion
1.06697e-82	1.48786	0.684	0.498	2.13395e-79	Megakaryocytes	SOD2	Patient 1_Preinfusion
0	0.912079	0.828	0.09	0	Monocytes	SOD2	Patient 1_Day 7
4.98773e-71	0.250309	0.373	0.037	9.97546e-68	Monocytes	SOD2	Patient 1_Day 13
7.81171e-09	1.30618	0.5	0.075	1.56234e-05	Megakaryocytes	SOD2	Patient 1_Day 13
5.23619e-108	0.727687	0.663	0.206	1.04724e-104	Monocytes	SOD2	Patient 2_Preinfusion
2.99694e-06	0.272749	0.382	0.047	0.00599388	Monocytes	SOD2	Patient 2_Day 24
4.32055e-265	0.700942	0.722	0.144	8.64111e-262	Monocytes	SOD2	Patient 2_Day 31
2.10129e-10	1.21503	0.833	0.336	4.20257e-07	Megakaryocytes	SOD2	Patient 2_Day 31
0	0.706049	0.582	0.128	0	Monocytes	SOD2	Patient 3_Preinfusion
9.1604e-17	0.481661	0.3	0.463	1.83208e-13	Megakaryocytes	SOD2	Patient 3_Preinfusion
0	0.446101	0.413	0.05	0	Monocytes	SOD2	Patient 3_Day 24
0	0.364057	0.56	0.143	0	Monocytes	SOD2	Patient 4_Preinfusion
2.72969e-83	0.224512	0.126	0.41	5.45939e-80	CD8 T	SOD2	Patient 4_Preinfusion
5.60076e-20	0.565527	0.488	0.38	1.12015e-16	Megakaryocytes	SOD2	Patient 4_Preinfusion
1.44054e-203	0.412662	0.635	0.131	2.88107e-200	Monocytes	SOD2	Patient 4_Day 8
3.81856e-61	1.4698	0.553	0.464	7.63712e-58	Megakaryocytes	SOD2	Patient 4_Day 8
0	0.625698	0.682	0.121	0	Monocytes	SOD2	Patient 4_Day 21
3.62853e-20	1.29667	0.5	0.372	7.25706e-17	Megakaryocytes	SOD2	Patient 4_Day 21
0	0.508811	0.623	0.103	0	Monocytes	SOCS3	Patient 1_Day 7
8.31165e-13	0.214586	0.354	0.111	1.66233e-09	CD4 T	SOCS3	Patient 1_Day 13
1.55595e-13	0.314823	0.444	0.234	3.1119e-10	CD4 T	SOCS3	Patient 2_Preinfusion
1.17746e-13	0.237809	0.308	0.094	2.35492e-10	CD4 T	SOCS3	Patient 2_Day 31
0	1.02302	0.761	0.122	0	Monocytes	SOCS3	Patient 4_Day 8
1.16427e-134	0.210216	0.281	0.058	2.32855e-131	Monocytes	SOCS3	Patient 4_Day 21
3.86883e-12	0.300132	0.4	0.251	7.73765e-09	CD4 T	SOCS2	Patient 4_Product
5.49405e-110	0.527277	0.326	0.063	1.09881e-106	CD4 T	SOCS1	Patient 1_Preinfusion
1.38158e-11	0.266315	0.447	0.272	2.76317e-08	CD4 T	SOCS1	Patient 1_Day 7
1.57558e-35	0.406147	0.319	0.04	3.15115e-32	CD4 T	SOCS1	Patient 2_Preinfusion
1.35756e-226	0.376368	0.269	0.023	2.71513e-223	CD4 T	SOCS1	Patient 3_Preinfusion
1.30185e-276	0.40668	0.313	0.046	2.6037e-273	CD4 T	SOCS1	Patient 4_Preinfusion
8.78698e-16	0.337827	0.241	0.028	1.7574e-12	CD4 T	SOCS1	Patient 4_Day 8
0	0.578079	0.356	0.012	0	B cells	SNX22	Healthy
4.83986e-107	0.252089	0.514	0.301	9.67973e-104	CD4 T	SNRPN	Healthy
5.63643e-130	1.19581	0.478	0.36	1.12729e-126	Megakaryocytes	SNRPN	Healthy
2.99889e-91	0.493113	0.361	0.087	5.99778e-88	CD4 T	SNRPN	Patient 1_Preinfusion
1.34638e-55	1.50014	0.509	0.123	2.69276e-52	Megakaryocytes	SNRPN	Patient 1_Preinfusion
5.50119e-09	0.938247	0.231	0.133	1.10024e-05	Megakaryocytes	SNRPN	Patient 1_Day 7
2.02301e-08	1.11608	0.5	0.209	4.04602e-05	Megakaryocytes	SNRPN	Patient 1_Day 13
4.47125e-24	0.344762	0.375	0.076	8.9425e-21	CD4 T	SNRPN	Patient 2_Preinfusion
5.60583e-28	0.290445	0.266	0.071	1.12117e-24	CD8 T	SNRPN	Patient 2_Preinfusion
2.39815e-11	1.09376	0.444	0.09	4.7963e-08	Megakaryocytes	SNRPN	Patient 2_Preinfusion
1.52879e-48	0.248407	0.296	0.133	3.05758e-45	CD8 T	SNRPN	Patient 2_Day 31
1.38421e-07	0.79068	0.5	0.225	0.000276841	Megakaryocytes	SNRPN	Patient 2_Day 31
8.1452e-29	0.722935	0.354	0.083	1.62904e-25	Megakaryocytes	SNRPN	Patient 4_Preinfusion
1.95799e-08	0.200807	0.33	0.113	3.91597e-05	CD4 T	SNRPN	Patient 4_Day 8
1.56181e-64	1.74292	0.395	0.117	3.12363e-61	Megakaryocytes	SNRPN	Patient 4_Day 8
1.29763e-49	0.225416	0.337	0.223	2.59527e-46	CD8 T	SNRPN	Patient 4_Day 21
1.62854e-19	1.19438	0.5	0.263	3.25708e-16	Megakaryocytes	SNRPN	Patient 4_Day 21
5.89446e-09	0.74014	0.773	0.262	1.17889e-05	B cells	SNRPN	Patient 4_Day 21
5.1914e-28	0.222088	0.268	0.171	1.03828e-24	CD4 T	SNRPN	Patient 3_Day 24 CAR T
0	2.28953	0.765	0.075	0	Megakaryocytes	SNCA	Healthy
6.24389e-120	2.43618	0.789	0.163	1.24878e-116	Megakaryocytes	SNCA	Patient 1_Preinfusion
5.76273e-43	2.08008	0.769	0.027	1.15255e-39	Megakaryocytes	SNCA	Patient 1_Day 7
2.25835e-09	1.48055	0.5	0.009	4.51669e-06	Megakaryocytes	SNCA	Patient 1_Day 13
3.43596e-38	1.97032	0.778	0.112	6.87191e-35	Megakaryocytes	SNCA	Patient 2_Preinfusion
3.24786e-51	2.07816	0.833	0.045	6.49572e-48	Megakaryocytes	SNCA	Patient 2_Day 31
8.01478e-213	2.56386	0.84	0.085	1.60296e-209	Megakaryocytes	SNCA	Patient 3_Preinfusion
8.36279e-29	1.12763	0.55	0.008	1.67256e-25	Megakaryocytes	SNCA	Patient 3_Day 24
1.69898e-105	1.30097	0.476	0.065	3.39796e-102	Megakaryocytes	SNCA	Patient 4_Preinfusion
4.80593e-131	2.96006	0.737	0.064	9.61186e-128	Megakaryocytes	SNCA	Patient 4_Day 8
1.3618e-81	2.65908	0.8	0.026	2.7236e-78	Megakaryocytes	SNCA	Patient 4_Day 21
2.03169e-15	1.5384	1	0.011	4.06338e-12	B cells	SMPD3	Patient 2_Day 31
1.29565e-32	1.02061	0.773	0.006	2.5913e-29	B cells	SMPD3	Patient 4_Day 21
2.60225e-122	1.81382	0.496	0.008	5.20451e-119	Megakaryocytes	SMOX	Healthy
5.88878e-98	2.13559	0.614	0.029	1.17776e-94	Megakaryocytes	SMOX	Patient 1_Preinfusion
1.85146e-33	1.67378	0.577	0.007	3.70292e-30	Megakaryocytes	SMOX	Patient 1_Day 7
2.01623e-15	2.08017	0.556	0.006	4.03246e-12	Megakaryocytes	SMOX	Patient 2_Preinfusion
9.21216e-22	1.52041	0.75	0.003	1.84243e-18	Megakaryocytes	SMOX	Patient 2_Day 31
4.20646e-80	1.68929	0.42	0.021	8.41291e-77	Megakaryocytes	SMOX	Patient 3_Preinfusion
1.17842e-62	1.0732	0.402	0.023	2.35684e-59	Megakaryocytes	SMOX	Patient 4_Preinfusion
2.58898e-66	1.48492	0.342	0.067	5.17795e-63	Megakaryocytes	SMOX	Patient 4_Day 8
6.50351e-48	2.46809	0.55	0.009	1.3007e-44	Megakaryocytes	SMOX	Patient 4_Day 21
8.27376e-37	0.441883	0.635	0.75	1.65475e-33	CD8 T	SMCHD1	Patient 1_Preinfusion
7.27313e-80	0.957407	0.662	0.714	1.45463e-76	CD8 T	SMCHD1	Patient 1_Day 7
9.02566e-09	0.28723	0.404	0.426	1.80513e-05	CD8 T	SMCHD1	Patient 3_Preinfusion
1.31779e-61	0.29494	0.454	0.368	2.63558e-58	CD8 T	SMCHD1	Patient 3_Day 24
2.31395e-146	1.12934	0.541	0.536	4.62791e-143	CD8 T	SMCHD1	Patient 4_Preinfusion
4.17168e-77	0.475155	0.58	0.661	8.34336e-74	CD8 T	SMCHD1	Patient 4_Day 8
5.43723e-38	0.570384	0.65	0.601	1.08745e-34	CD8 T	SMCHD1	Patient 3_Day 24 CAR T
1.15585e-92	0.85102	0.415	0.126	2.3117e-89	CD8 T	SMC4	Patient 1_Preinfusion
3.58124e-68	0.635666	0.411	0.111	7.16249e-65	CD8 T	SMC4	Patient 2_Preinfusion
6.89107e-73	0.361265	0.363	0.201	1.37821e-69	CD8 T	SMC4	Patient 2_Day 31
1.07795e-84	0.370689	0.308	0.074	2.15591e-81	CD8 T	SMC4	Patient 3_Preinfusion
6.94285e-45	0.47259	0.259	0.132	1.38857e-41	CD8 T	SMC4	Patient 4_Day 8
1.49463e-64	0.249944	0.267	0.155	2.98926e-61	CD8 T	SMC4	Patient 4_Day 21
1.63565e-11	0.343961	0.634	0.456	3.2713e-08	CD8 T	SMC4	Patient 1_Product
3.55542e-07	0.326861	0.672	0.531	0.000711084	CD8 T	SMC4	Patient 3_Product
5.14108e-22	0.321012	0.284	0.214	1.02822e-18	CD8 T	SMC4	Patient 3_Day 24 CAR T
1.20161e-21	0.33408	0.581	0.349	2.40321e-18	CD8 T	SMC4	Patient 4_Product
1.4088e-07	0.524569	0.567	0.424	0.00028176	CD8 T	SMC4	Patient 4_Day 8 CAR T
5.66684e-59	0.499549	0.25	0.034	1.13337e-55	CD8 T	SMC2	Patient 1_Preinfusion
1.35788e-36	0.365807	0.201	0.033	2.71577e-33	CD8 T	SMC2	Patient 2_Preinfusion
5.40702e-12	0.268548	0.398	0.178	1.0814e-08	CD8 T	SMC2	Patient 1_Product
4.36984e-06	0.402495	0.44	0.312	0.00873968	CD8 T	SMC2	Patient 4_Day 8 CAR T
9.97735e-175	0.353875	0.57	0.298	1.99547e-171	CD4 T	SLFN5	Healthy
2.33997e-98	0.449685	0.528	0.346	4.67994e-95	CD8 T	SLFN5	Healthy
1.76157e-32	0.346194	0.592	0.364	3.52314e-29	NK	SLFN5	Healthy
2.75725e-68	0.36331	0.369	0.255	5.5145e-65	CD4 T	SLFN5	Patient 1_Preinfusion
3.49404e-23	0.382237	0.398	0.26	6.98808e-20	CD8 T	SLFN5	Patient 1_Preinfusion
3.98855e-41	0.44023	0.384	0.354	7.97711e-38	CD8 T	SLFN5	Patient 1_Day 7
2.65037e-20	0.413413	0.469	0.173	5.30075e-17	CD4 T	SLFN5	Patient 2_Preinfusion
9.93775e-24	0.32067	0.351	0.169	1.98755e-20	CD8 T	SLFN5	Patient 2_Preinfusion
3.99206e-08	0.532163	0.432	0.184	7.98411e-05	NK	SLFN5	Patient 2_Preinfusion
2.79308e-63	0.344986	0.493	0.355	5.58616e-60	CD8 T	SLFN5	Patient 2_Day 31
1.52209e-06	0.333278	0.618	0.428	0.00304418	NK	SLFN5	Patient 2_Day 31
1.13197e-101	0.230569	0.281	0.141	2.26394e-98	CD8 T	SLFN5	Patient 3_Day 24
3.83603e-37	0.396376	0.234	0.087	7.67207e-34	CD8 T	SLFN5	Patient 4_Day 8
1.33741e-11	0.460211	0.292	0.11	2.67481e-08	NK	SLFN5	Patient 4_Day 8
3.27229e-16	0.218058	0.424	0.244	6.54458e-13	CD4 T	SLFN5	Patient 4_Day 21
9.84355e-61	0.28168	0.35	0.206	1.96871e-57	CD8 T	SLFN5	Patient 4_Day 21
1.9658e-15	0.202975	0.296	0.256	3.93159e-12	NK	SLFN5	Patient 4_Day 21
8.31164e-59	0.270628	0.264	0.044	1.66233e-55	NK	SLFN13	Healthy
3.18152e-102	0.351463	0.231	0.065	6.36305e-99	CD8 T	SLFN12L	Healthy
4.09134e-07	0.201949	0.296	0.09	0.000818268	Gamma Delta T	SLFN12L	Healthy
1.49357e-52	0.86245	0.236	0.095	2.98714e-49	CD8 T	SLFN12L	Patient 1_Day 7
8.48844e-61	0.385475	0.292	0.02	1.69769e-57	CD8 T	SLFN12L	Patient 2_Preinfusion
1.28831e-60	0.345385	0.279	0.076	2.57662e-57	CD8 T	SLFN12L	Patient 2_Day 31
3.61966e-07	0.271011	0.422	0.184	0.000723931	NK	SLFN12L	Patient 2_Day 31
3.45861e-53	0.494651	0.221	0.039	6.91722e-50	CD8 T	SLFN12L	Patient 4_Day 8
2.33674e-17	0.382072	0.298	0.067	4.67349e-14	NK	SLFN12L	Patient 4_Day 8
4.91575e-69	0.253258	0.21	0.058	9.8315e-66	CD8 T	SLFN12L	Patient 4_Day 21
4.1796e-07	0.231945	0.229	0.11	0.00083592	Gamma Delta T	SLFN12L	Patient 4_Day 21
4.0555e-14	0.310546	0.201	0.161	8.111e-11	CD8 T	SLFN12L	Patient 3_Day 24 CAR T
2.69047e-29	0.282672	0.241	0.056	5.38093e-26	CD8 T	SLF1	Patient 2_Preinfusion
9.11292e-42	0.29162	0.236	0.098	1.82258e-38	CD8 T	SLF1	Patient 2_Day 31
1.02876e-59	0.239618	0.227	0.093	2.05753e-56	CD8 T	SLF1	Patient 4_Day 21
9.58432e-24	0.439472	0.381	0.32	1.91686e-20	CD8 T	SLF1	Patient 3_Day 24 CAR T
6.60859e-48	0.240917	0.208	0.201	1.32172e-44	CD8 T	SLC4A7	Healthy
7.88203e-25	0.333251	0.26	0.153	1.57641e-21	CD8 T	SLC4A7	Patient 1_Preinfusion
5.50716e-28	0.660145	0.207	0.132	1.10143e-24	CD8 T	SLC4A7	Patient 1_Day 7
2.84961e-51	0.329746	0.33	0.201	5.69922e-48	CD8 T	SLC4A7	Patient 2_Day 31
5.72471e-46	0.483278	0.216	0.09	1.14494e-42	CD8 T	SLC4A7	Patient 4_Day 8
1.03568e-41	0.233217	0.224	0.132	2.07136e-38	CD8 T	SLC4A7	Patient 4_Day 21
9.30465e-30	0.523358	0.378	0.31	1.86093e-26	CD8 T	SLC4A7	Patient 3_Day 24 CAR T
1.17566e-219	1.69574	0.478	0.15	2.35132e-216	Megakaryocytes	SLC40A1	Healthy
4.12732e-45	1.82768	0.316	0.065	8.25463e-42	Megakaryocytes	SLC40A1	Patient 1_Preinfusion
3.75577e-11	1.07084	0.269	0.009	7.51154e-08	Megakaryocytes	SLC40A1	Patient 1_Day 7
9.64031e-11	1.2057	0.333	0.05	1.92806e-07	Megakaryocytes	SLC40A1	Patient 2_Preinfusion
2.04473e-17	1.54519	0.583	0.04	4.08946e-14	Megakaryocytes	SLC40A1	Patient 2_Day 31
4.95302e-33	0.950311	0.22	0.031	9.90604e-30	Megakaryocytes	SLC40A1	Patient 3_Preinfusion
5.01238e-49	1.01508	0.341	0.024	1.00248e-45	Megakaryocytes	SLC40A1	Patient 4_Preinfusion
3.7501e-62	2.10956	0.55	0.04	7.5002e-59	Megakaryocytes	SLC40A1	Patient 4_Day 21
2.19939e-61	0.218579	0.52	0.564	4.39879e-58	CD8 T	SLC38A2	Healthy
1.91606e-59	0.452917	0.225	0.354	3.83212e-56	CD8 T	SLC38A2	Patient 1_Day 7
1.86922e-35	0.981759	0.237	0.266	3.73844e-32	CD8 T	SLC38A2	Patient 4_Preinfusion
3.02946e-41	0.317934	0.272	0.343	6.05892e-38	CD8 T	SLC38A2	Patient 4_Day 8
2.71352e-08	0.233359	0.339	0.327	5.42704e-05	NK	SLC38A2	Patient 4_Day 8
1.50277e-12	0.322285	0.233	0.214	3.00555e-09	CD8 T	SLC38A2	Patient 3_Day 24 CAR T
1.41168e-59	0.329874	0.492	0.321	2.82336e-56	CD8 T	SLC38A1	Healthy
7.28376e-56	0.278457	0.5	0.321	1.45675e-52	B cells	SLC38A1	Healthy
6.06285e-93	0.481442	0.342	0.067	1.21257e-89	CD4 T	SLC38A1	Patient 1_Preinfusion
1.91797e-54	0.528144	0.385	0.083	3.83594e-51	CD8 T	SLC38A1	Patient 1_Preinfusion
7.13772e-96	0.834197	0.361	0.136	1.42754e-92	CD8 T	SLC38A1	Patient 1_Day 7
7.50172e-32	0.420846	0.406	0.062	1.50034e-28	CD4 T	SLC38A1	Patient 2_Preinfusion
7.86194e-64	0.471987	0.379	0.046	1.57239e-60	CD8 T	SLC38A1	Patient 2_Preinfusion
4.45469e-09	0.496992	0.432	0.075	8.90937e-06	NK	SLC38A1	Patient 2_Preinfusion
2.19151e-75	0.377209	0.36	0.112	4.38302e-72	CD8 T	SLC38A1	Patient 2_Day 31
2.88955e-60	0.288082	0.217	0.048	5.77909e-57	CD8 T	SLC38A1	Patient 3_Preinfusion
7.44536e-150	0.265175	0.277	0.108	1.48907e-146	CD8 T	SLC38A1	Patient 3_Day 24
1.36962e-88	0.954062	0.303	0.09	2.73924e-85	CD8 T	SLC38A1	Patient 4_Preinfusion
1.51389e-119	0.789729	0.402	0.054	3.02778e-116	CD8 T	SLC38A1	Patient 4_Day 8
1.5946e-26	0.679324	0.452	0.112	3.1892e-23	NK	SLC38A1	Patient 4_Day 8
2.48299e-114	0.321079	0.355	0.109	4.96597e-111	CD8 T	SLC38A1	Patient 4_Day 21
4.62061e-31	0.393371	0.379	0.187	9.24123e-28	NK	SLC38A1	Patient 4_Day 21
2.07464e-19	0.350233	0.499	0.464	4.14928e-16	CD8 T	SLC38A1	Patient 3_Day 24 CAR T
6.39959e-81	0.300822	0.708	0.546	1.27992e-77	CD4 T	SLC2A3	Healthy
4.58796e-70	0.383887	0.28	0.448	9.17592e-67	CD8 T	SLC2A3	Patient 1_Day 7
8.83814e-38	0.47844	0.624	0.374	1.76763e-34	Monocytes	SLC2A3	Patient 2_Preinfusion
4.92653e-247	0.401606	0.594	0.275	9.85306e-244	Monocytes	SLC2A3	Patient 3_Preinfusion
9.83842e-16	0.299411	0.2	0.511	1.96768e-12	Megakaryocytes	SLC2A3	Patient 3_Preinfusion
6.67295e-60	0.839215	0.399	0.553	1.33459e-56	CD8 T	SLC2A3	Patient 4_Preinfusion
6.51469e-90	0.23298	0.584	0.246	1.30294e-86	Monocytes	SLC2A3	Patient 4_Day 8
2.21447e-61	0.223537	0.218	0.087	4.42895e-58	B cells	SLC25A42	Healthy
7.52579e-274	1.80361	0.205	0.494	1.50516e-270	CD8 T	SLC25A37	Patient 1_Preinfusion
0	1.10157	0.835	0.059	0	Monocytes	SLC25A37	Patient 1_Day 7
2.55357e-54	0.401804	0.439	0.137	5.10714e-51	Monocytes	SLC25A37	Patient 2_Preinfusion
7.31928e-102	0.247452	0.365	0.074	1.46386e-98	Monocytes	SLC25A37	Patient 2_Day 31
1.43278e-219	0.313276	0.343	0.092	2.86557e-216	Monocytes	SLC25A37	Patient 3_Preinfusion
1.61774e-229	0.211963	0.229	0.043	3.23549e-226	Monocytes	SLC25A37	Patient 3_Day 24
0	0.421983	0.446	0.067	0	Monocytes	SLC25A37	Patient 4_Preinfusion
0	0.944984	0.768	0.108	0	Monocytes	SLC25A37	Patient 4_Day 8
1.82984e-197	0.275563	0.397	0.084	3.65969e-194	Monocytes	SLC25A37	Patient 4_Day 21
0	1.04814	0.87	0.036	0	Monocytes	SLC11A1	Healthy
0	0.701398	0.656	0.081	0	Monocytes	SLC11A1	Patient 1_Preinfusion
0	0.648361	0.682	0.018	0	Monocytes	SLC11A1	Patient 1_Day 7
4.52645e-190	0.846293	0.695	0.08	9.05291e-187	Monocytes	SLC11A1	Patient 2_Preinfusion
0	0.823237	0.713	0.01	0	Monocytes	SLC11A1	Patient 2_Day 31
0	0.672622	0.55	0.053	0	Monocytes	SLC11A1	Patient 3_Preinfusion
0	0.37259	0.353	0.012	0	Monocytes	SLC11A1	Patient 3_Day 24
0	0.723404	0.637	0.033	0	Monocytes	SLC11A1	Patient 4_Preinfusion
0	0.954836	0.815	0.064	0	Monocytes	SLC11A1	Patient 4_Day 8
0	0.692705	0.665	0.02	0	Monocytes	SLC11A1	Patient 4_Day 21
8.19506e-134	1.33979	0.4	0.07	1.63901e-130	Megakaryocytes	SLA2	Healthy
2.00054e-40	1.40839	0.351	0.022	4.00108e-37	Megakaryocytes	SLA2	Patient 1_Preinfusion
7.03787e-10	1.1292	0.444	0.02	1.40757e-06	Megakaryocytes	SLA2	Patient 2_Preinfusion
1.2987e-49	1.69192	0.42	0.011	2.5974e-46	Megakaryocytes	SLA2	Patient 3_Preinfusion
8.81836e-28	0.624324	0.232	0.017	1.76367e-24	Megakaryocytes	SLA2	Patient 4_Preinfusion
3.13354e-14	1.33753	0.289	0.041	6.26708e-11	Megakaryocytes	SLA2	Patient 4_Day 8
7.59817e-26	1.46763	0.45	0.069	1.51963e-22	Megakaryocytes	SLA2	Patient 4_Day 21
5.07786e-191	0.312454	0.502	0.208	1.01557e-187	CD4 T	SKAP1	Healthy
1.1876e-93	0.365004	0.502	0.252	2.3752e-90	CD8 T	SKAP1	Healthy
2.144e-10	0.259561	0.63	0.289	4.288e-07	Gamma Delta T	SKAP1	Healthy
6.30691e-65	0.435883	0.638	0.274	1.26138e-61	NK	SKAP1	Healthy
1.1487e-182	0.750521	0.501	0.056	2.2974e-179	CD4 T	SKAP1	Patient 1_Preinfusion
6.81008e-107	0.731641	0.548	0.084	1.36202e-103	CD8 T	SKAP1	Patient 1_Preinfusion
1.95268e-154	0.667152	0.522	0.198	3.90535e-151	CD8 T	SKAP1	Patient 1_Day 7
1.3899e-66	0.691273	0.638	0.072	2.77979e-63	CD4 T	SKAP1	Patient 2_Preinfusion
3.82205e-132	0.776826	0.602	0.045	7.64411e-129	CD8 T	SKAP1	Patient 2_Preinfusion
4.14558e-09	0.645716	0.486	0.095	8.29116e-06	NK	SKAP1	Patient 2_Preinfusion
2.24052e-179	0.620253	0.584	0.138	4.48105e-176	CD8 T	SKAP1	Patient 2_Day 31
3.07966e-08	0.214639	0.667	0.383	6.15932e-05	NK	SKAP1	Patient 2_Day 31
1.80072e-190	0.343697	0.273	0.029	3.60145e-187	CD4 T	SKAP1	Patient 3_Preinfusion
2.49056e-134	0.419916	0.312	0.038	4.98111e-131	CD8 T	SKAP1	Patient 3_Preinfusion
3.32994e-225	0.295991	0.39	0.156	6.65987e-222	CD8 T	SKAP1	Patient 3_Day 24
1.56936e-214	0.283001	0.276	0.045	3.13872e-211	CD4 T	SKAP1	Patient 4_Preinfusion
2.84493e-60	0.360685	0.28	0.089	5.68986e-57	CD8 T	SKAP1	Patient 4_Preinfusion
1.25859e-16	0.331896	0.482	0.148	2.51717e-13	CD4 T	SKAP1	Patient 4_Day 8
1.55109e-168	0.805714	0.512	0.063	3.10219e-165	CD8 T	SKAP1	Patient 4_Day 8
6.74849e-09	0.71367	0.564	0.154	1.3497e-05	Gamma Delta T	SKAP1	Patient 4_Day 8
1.66137e-38	0.592637	0.589	0.137	3.32274e-35	NK	SKAP1	Patient 4_Day 8
1.29986e-57	0.344312	0.7	0.329	2.59972e-54	CD4 T	SKAP1	Patient 4_Day 21
2.84902954674355e-319	0.628325	0.667	0.183	5.6980590934871e-316	CD8 T	SKAP1	Patient 4_Day 21
1.84422e-09	0.321564	0.577	0.352	3.68844e-06	Gamma Delta T	SKAP1	Patient 4_Day 21
7.71922e-30	0.428706	0.608	0.342	1.54384e-26	NK	SKAP1	Patient 4_Day 21
7.89226e-141	0.260473	0.353	0.13	1.57845e-137	CD4 T	SIT1	Healthy
3.17584e-55	0.260576	0.333	0.167	6.35168e-52	CD8 T	SIT1	Healthy
3.68193e-24	0.259453	0.256	0.028	7.36386e-21	CD4 T	SIT1	Patient 2_Preinfusion
5.42854e-55	0.347435	0.257	0.015	1.08571e-51	CD8 T	SIT1	Patient 2_Preinfusion
1.12979e-97	0.363679	0.309	0.051	2.25958e-94	CD8 T	SIT1	Patient 2_Day 31
8.83385e-33	0.239781	0.34	0.118	1.76677e-29	CD4 T	SIT1	Patient 4_Day 21
1.33378e-131	0.323917	0.278	0.054	2.66757e-128	CD8 T	SIT1	Patient 4_Day 21
1.30346e-129	1.81687	0.557	0.006	2.60691e-126	Megakaryocytes	SH3BGRL2	Healthy
2.36146e-18	1.06385	0.308	0	4.72292e-15	Megakaryocytes	SH3BGRL2	Patient 1_Day 7
1.70136e-14	1.03068	0.5	0.001	3.40272e-11	Megakaryocytes	SH3BGRL2	Patient 2_Day 31
2.60299e-35	1.39091	0.3	0.003	5.20597e-32	Megakaryocytes	SH3BGRL2	Patient 3_Preinfusion
4.91059e-34	0.684498	0.28	0.006	9.82117e-31	Megakaryocytes	SH3BGRL2	Patient 4_Preinfusion
2.76005e-19	1.43914	0.263	0.001	5.52011e-16	Megakaryocytes	SH3BGRL2	Patient 4_Day 8
4.67877e-87	0.24743	0.235	0.066	9.35753e-84	CD8 T	SH2D2A	Healthy
3.5501e-13	0.266218	0.383	0.091	7.1002e-10	Gamma Delta T	SH2D2A	Healthy
1.42937e-74	0.406218	0.368	0.079	2.85875e-71	NK	SH2D2A	Healthy
2.62732e-07	0.386852	0.243	0.027	0.000525465	NK	SH2D2A	Patient 2_Preinfusion
1.04118e-13	0.36639	0.412	0.112	2.08237e-10	NK	SH2D2A	Patient 2_Day 31
2.73756e-16	0.223783	0.208	0.032	5.47512e-13	NK	SH2D2A	Patient 4_Day 8
3.50389e-121	0.323623	0.319	0.082	7.00777e-118	CD8 T	SH2D2A	Patient 4_Day 21
8.56781e-15	0.432467	0.383	0.162	1.71356e-11	Gamma Delta T	SH2D2A	Patient 4_Day 21
6.98863e-34	0.442717	0.384	0.154	1.39773e-30	NK	SH2D2A	Patient 4_Day 21
1.34527e-06	0.251501	0.495	0.311	0.00269053	Gamma Delta T	SH2D2A	Patient 4_Product
4.81051e-172	0.465243	0.385	0.11	9.62102e-169	CD8 T	SH2D1A	Healthy
1.01326e-07	0.208296	0.395	0.151	0.000202652	Gamma Delta T	SH2D1A	Healthy
3.13567e-64	0.413884	0.454	0.138	6.27135e-61	NK	SH2D1A	Healthy
3.78873e-45	0.270927	0.215	0.024	7.57745e-42	CD8 T	SH2D1A	Patient 1_Preinfusion
4.0492e-28	0.230076	0.28	0.094	8.09839e-25	CD8 T	SH2D1A	Patient 1_Day 13
5.24861e-19	0.231716	0.244	0.037	1.04972e-15	CD4 T	SH2D1A	Patient 2_Preinfusion
5.4797e-65	0.437153	0.304	0.019	1.09594e-61	CD8 T	SH2D1A	Patient 2_Preinfusion
1.04026e-99	0.390313	0.327	0.059	2.08052e-96	CD8 T	SH2D1A	Patient 2_Day 31
3.83589e-128	0.279177	0.213	0.012	7.67178e-125	CD8 T	SH2D1A	Patient 3_Preinfusion
7.41561e-258	0.324939	0.284	0.072	1.48312e-254	CD8 T	SH2D1A	Patient 3_Day 24
1.01451e-99	0.56096	0.3	0.028	2.02903e-96	CD8 T	SH2D1A	Patient 4_Day 8
1.1221e-17	0.483923	0.315	0.074	2.24421e-14	NK	SH2D1A	Patient 4_Day 8
1.31355e-135	0.317698	0.311	0.068	2.62709e-132	CD8 T	SH2D1A	Patient 4_Day 21
5.84362e-09	0.289089	0.297	0.152	1.16872e-05	Gamma Delta T	SH2D1A	Patient 4_Day 21
4.42315e-15	0.252007	0.269	0.149	8.8463e-12	NK	SH2D1A	Patient 4_Day 21
1.35129e-37	0.435107	0.64	0.572	2.70259e-34	CD8 T	SH2D1A	Patient 3_Day 24 CAR T
4.26551e-123	0.234381	0.315	0.117	8.53103e-120	CD4 T	SFXN1	Healthy
2.57875e-31	0.216044	0.24	0.161	5.1575e-28	CD8 T	SFXN1	Healthy
3.8543e-70	0.427914	0.347	0.115	7.7086e-67	CD4 T	SFXN1	Patient 1_Preinfusion
2.61266e-46	0.559172	0.4	0.127	5.22531e-43	CD8 T	SFXN1	Patient 1_Preinfusion
9.9684e-36	0.725698	0.23	0.122	1.99368e-32	CD8 T	SFXN1	Patient 1_Day 7
1.67967e-20	0.353687	0.331	0.08	3.35933e-17	CD4 T	SFXN1	Patient 2_Preinfusion
8.86279e-31	0.304878	0.279	0.072	1.77256e-27	CD8 T	SFXN1	Patient 2_Preinfusion
9.6033e-31	0.20046	0.202	0.105	1.92066e-27	CD8 T	SFXN1	Patient 2_Day 31
6.63887e-62	0.516153	0.254	0.085	1.32777e-58	CD8 T	SFXN1	Patient 4_Preinfusion
7.45055e-12	0.283455	0.366	0.105	1.49011e-08	CD4 T	SFXN1	Patient 4_Day 8
2.80757e-44	0.460423	0.229	0.082	5.61513e-41	CD8 T	SFXN1	Patient 4_Day 8
7.33506e-23	0.203833	0.3	0.119	1.46701e-19	CD4 T	SFXN1	Patient 4_Day 21
6.31031e-43	0.272424	0.273	0.188	1.26206e-39	CD8 T	SFI1	Healthy
1.2893e-88	0.252072	0.826	0.817	2.5786e-85	B cells	SET	Healthy
1.67076e-14	0.207829	1	0.836	3.34153e-11	DC	SET	Patient 1_Preinfusion
5.5723e-36	0.205511	0.816	0.845	1.11446e-32	CD4 T	SET	Patient 1_Preinfusion
2.10086e-73	0.343581	0.73	0.851	4.20172e-70	CD8 T	SET	Patient 1_Preinfusion
5.13436e-114	0.303612	0.753	0.804	1.02687e-110	CD8 T	SET	Patient 1_Day 7
1.1679e-44	0.454825	0.824	0.712	2.3358e-41	CD8 T	SET	Patient 2_Preinfusion
2.32067e-66	0.22235	0.745	0.781	4.64134e-63	CD8 T	SET	Patient 2_Day 31
3.71725e-80	0.340209	0.592	0.531	7.4345e-77	CD8 T	SET	Patient 3_Preinfusion
2.27739e-51	0.885433	0.32	0.536	4.55478e-48	Megakaryocytes	SET	Patient 3_Preinfusion
6.03669e-26	0.360695	0.5	0.535	1.20734e-22	NK	SET	Patient 3_Preinfusion
3.926e-56	0.240413	0.936	0.549	7.852e-53	DC	SET	Patient 4_Preinfusion
6.94616e-09	0.224424	0.493	0.562	1.38923e-05	NK	SET	Patient 4_Preinfusion
4.11773e-122	0.417867	0.703	0.774	8.23547e-119	CD8 T	SET	Patient 4_Day 8
8.82933e-25	0.398503	0.316	0.764	1.76587e-21	Megakaryocytes	SET	Patient 4_Day 8
3.51029e-14	0.303116	0.786	0.758	7.02058e-11	NK	SET	Patient 4_Day 8
2.21999e-162	0.327326	0.855	0.862	4.43997e-159	CD8 T	SET	Patient 4_Day 21
1.02438e-82	1.29752	0.391	0.005	2.04875e-79	Megakaryocytes	SELP	Healthy
1.39557e-41	1.34126	0.368	0.002	2.79114e-38	Megakaryocytes	SELP	Patient 1_Preinfusion
3.58871e-16	0.995968	0.583	0.002	7.17743e-13	Megakaryocytes	SELP	Patient 2_Day 31
5.88986e-26	1.00474	0.26	0.003	1.17797e-22	Megakaryocytes	SELP	Patient 3_Preinfusion
5.55832e-13	1.24213	0.3	0.001	1.11166e-09	Megakaryocytes	SELP	Patient 4_Day 21
1.78648e-143	0.469279	0.78	0.597	3.57296e-140	B cells	SELL	Healthy
1.7502e-226	0.636851	0.822	0.347	3.50041e-223	Monocytes	SELL	Patient 1_Preinfusion
0	1.12967	0.881	0.121	0	Monocytes	SELL	Patient 1_Day 7
1.06585e-11	0.201855	0.833	0.188	2.13169e-08	DC	SELL	Patient 1_Day 13
1.86404e-57	0.224927	0.52	0.149	3.72809e-54	Monocytes	SELL	Patient 1_Day 13
6.8865e-34	0.355817	0.53	0.263	1.3773e-30	Monocytes	SELL	Patient 2_Preinfusion
1.72294e-12	0.37453	0.767	0.24	3.44588e-09	DC	SELL	Patient 2_Day 31
7.48844e-90	0.305316	0.453	0.142	1.49769e-86	Monocytes	SELL	Patient 2_Day 31
3.30157e-06	0.24593	0.125	0.247	0.00660314	Gamma Delta T	SELL	Patient 2_Day 31
8.2159e-10	0.377769	0.324	0.244	1.64318e-06	NK	SELL	Patient 2_Day 31
6.99594e-173	0.346234	0.542	0.287	1.39919e-169	Monocytes	SELL	Patient 3_Preinfusion
1.80927e-106	0.453664	0.372	0.27	3.61854e-103	NK	SELL	Patient 3_Day 24
1.56868e-277	0.352383	0.512	0.178	3.13737e-274	Monocytes	SELL	Patient 4_Preinfusion
2.62521e-79	0.343464	0.534	0.215	5.25041e-76	Monocytes	SELL	Patient 4_Day 8
3.03364e-21	0.362033	0.491	0.335	6.06728e-18	CD4 T	SELL	Patient 4_Day 21
1.1647e-10	0.967476	0.773	0.346	2.32941e-07	B cells	SELL	Patient 4_Day 21
1.10459e-49	0.434009	0.331	0.348	2.20917e-46	NK	SELL	Patient 4_Day 21
1.08604e-33	0.277874	0.62	0.577	2.17207e-30	CD4 T	SELL	Patient 3_Day 24 CAR T
0	0.821857	0.589	0.098	0	B cells	SEL1L3	Healthy
5.10825e-08	1.29213	0.833	0.085	0.000102165	B cells	SEL1L3	Patient 2_Day 31
2.82579e-11	0.643797	0.636	0.067	5.65158e-08	B cells	SEL1L3	Patient 4_Day 21
7.28973e-118	1.7077	0.513	0.012	1.45795e-114	Megakaryocytes	SCN1B	Healthy
2.98421e-65	1.2222	0.298	0.045	5.96841e-62	Megakaryocytes	SCN1B	Patient 1_Preinfusion
6.61679e-18	1.59744	0.556	0.019	1.32336e-14	Megakaryocytes	SCN1B	Patient 2_Preinfusion
6.77011e-13	0.893661	0.5	0.006	1.35402e-09	Megakaryocytes	SCN1B	Patient 2_Day 31
6.67788e-64	1.47132	0.42	0.026	1.33558e-60	Megakaryocytes	SCN1B	Patient 3_Preinfusion
2.05311e-32	0.621987	0.207	0.023	4.10621e-29	Megakaryocytes	SCN1B	Patient 4_Preinfusion
2.46051e-36	1.63791	0.316	0.021	4.92103e-33	Megakaryocytes	SCN1B	Patient 4_Day 8
4.9641e-31	1.64012	0.25	0.009	9.9282e-28	Megakaryocytes	SCN1B	Patient 4_Day 21
7.40627e-153	0.255896	0.315	0.098	1.48125e-149	CD4 T	SCML4	Healthy
1.61598e-33	0.244936	0.254	0.142	3.23196e-30	CD8 T	SCML4	Healthy
9.2638e-52	0.276853	0.235	0.041	1.85276e-48	NK	SBK1	Healthy
2.51877e-151	0.339936	0.484	0.287	5.03753e-148	CD4 T	SATB1	Healthy
3.16533e-43	0.225216	0.388	0.334	6.33066e-40	CD8 T	SATB1	Healthy
5.83985e-82	0.460556	0.335	0.134	1.16797e-78	CD4 T	SATB1	Patient 1_Preinfusion
6.46672e-13	0.271479	0.215	0.159	1.29334e-09	CD8 T	SATB1	Patient 1_Preinfusion
7.25228e-21	0.306641	0.214	0.043	1.45046e-17	CD4 T	SATB1	Patient 1_Day 7
6.4299e-10	0.239276	0.238	0.114	1.28598e-06	CD4 T	SATB1	Patient 2_Preinfusion
2.32802e-08	0.259897	0.235	0.084	4.65603e-05	NK	SATB1	Patient 2_Day 31
0	1.07464	0.995	0.758	0	Monocytes	SAT1	Healthy
2.98562e-100	1.52633	0.965	0.833	5.97125e-97	Megakaryocytes	SAT1	Healthy
0	0.854957	0.99	0.642	0	Monocytes	SAT1	Patient 1_Preinfusion
4.32644e-18	0.394311	0.632	0.897	8.65287e-15	Megakaryocytes	SAT1	Patient 1_Preinfusion
0	0.684992	0.993	0.609	0	Monocytes	SAT1	Patient 1_Day 7
2.17495e-85	0.652929	0.945	0.52	4.34991e-82	Monocytes	SAT1	Patient 1_Day 13
7.05347e-273	1.08023	0.979	0.657	1.41069e-269	Monocytes	SAT1	Patient 2_Preinfusion
2.91377e-15	1.10951	0.882	0.231	5.82754e-12	Monocytes	SAT1	Patient 2_Day 24
0	1.4298	0.965	0.584	0	Monocytes	SAT1	Patient 2_Day 31
0	0.888674	0.961	0.515	0	Monocytes	SAT1	Patient 3_Preinfusion
1.9076e-49	1.46102	0.92	0.843	3.8152e-46	Megakaryocytes	SAT1	Patient 3_Preinfusion
7.91631e-35	0.228534	0.973	0.53	1.58326e-31	DC	SAT1	Patient 3_Day 24
0	1.26143	0.955	0.375	0	Monocytes	SAT1	Patient 3_Day 24
0	0.940635	0.978	0.55	0	Monocytes	SAT1	Patient 4_Preinfusion
6.53418e-15	0.637086	0.841	0.794	1.30684e-11	Megakaryocytes	SAT1	Patient 4_Preinfusion
3.85371203756172e-322	0.78573	0.981	0.559	7.70742407512345e-319	Monocytes	SAT1	Patient 4_Day 8
5.57387e-33	1.39612	0.947	0.838	1.11477e-29	Megakaryocytes	SAT1	Patient 4_Day 8
0	1.61151	0.998	0.557	0	Monocytes	SAT1	Patient 4_Day 21
2.16185e-07	0.634357	0.5	0.25	0.000432369	Monocytes	SAT1	Patient 2_Product
2.41789e-08	1.34784	0.143	0.529	4.83579e-05	B cells	SAT1	Patient 3_Day 24 CAR T
1.98512e-102	0.855785	1	0.637	3.97024e-99	DC	SAMHD1	Healthy
0	0.446133	0.919	0.51	0	Monocytes	SAMHD1	Healthy
8.41051e-18	0.286326	1	0.861	1.6821e-14	DC	SAMHD1	Patient 1_Preinfusion
4.88671e-271	0.559172	0.968	0.595	9.77342e-268	Monocytes	SAMHD1	Patient 1_Preinfusion
4.77513e-268	0.336772	0.962	0.552	9.55027e-265	Monocytes	SAMHD1	Patient 1_Day 7
1.62403e-09	0.580193	1	0.32	3.24806e-06	DC	SAMHD1	Patient 1_Day 13
2.36905e-13	0.359024	1	0.856	4.73809e-10	DC	SAMHD1	Patient 2_Preinfusion
1.08895e-83	0.487438	0.914	0.627	2.1779e-80	Monocytes	SAMHD1	Patient 2_Preinfusion
6.93372e-22	0.749716	1	0.729	1.38674e-18	DC	SAMHD1	Patient 2_Day 31
2.9117e-176	0.547827	0.943	0.626	5.8234e-173	Monocytes	SAMHD1	Patient 2_Day 31
1.79815e-178	0.312957	0.709	0.434	3.5963e-175	Monocytes	SAMHD1	Patient 3_Preinfusion
1.13088e-36	0.300258	0.927	0.437	2.26176e-33	DC	SAMHD1	Patient 3_Day 24
0	0.38713	0.724	0.335	0	Monocytes	SAMHD1	Patient 3_Day 24
2.43752e-66	0.257207	0.953	0.534	4.87504e-63	DC	SAMHD1	Patient 4_Preinfusion
6.71446e-256	0.209174	0.692	0.356	1.34289e-252	Monocytes	SAMHD1	Patient 4_Preinfusion
1.09494e-63	0.260156	0.363	0.569	2.18988e-60	CD8 T	SAMHD1	Patient 4_Preinfusion
8.73605e-17	0.354102	1	0.76	1.74721e-13	DC	SAMHD1	Patient 4_Day 8
5.99617e-207	0.516817	0.919	0.469	1.19923e-203	Monocytes	SAMHD1	Patient 4_Day 8
2.08495e-41	0.677633	1	0.739	4.16991e-38	DC	SAMHD1	Patient 4_Day 21
1.18783e-271	0.412982	0.938	0.584	2.37566e-268	Monocytes	SAMHD1	Patient 4_Day 21
7.07199e-260	0.670521	0.548	0.155	1.4144e-256	CD8 T	SAMD3	Healthy
5.34694e-23	0.650579	0.741	0.213	1.06939e-19	Gamma Delta T	SAMD3	Healthy
2.95106e-237	0.896839	0.837	0.185	5.90211e-234	NK	SAMD3	Healthy
3.36264e-75	0.460383	0.322	0.03	6.72529e-72	CD8 T	SAMD3	Patient 1_Preinfusion
1.64971e-06	0.8943	0.462	0.052	0.00329943	Gamma Delta T	SAMD3	Patient 1_Preinfusion
1.91195e-116	0.756276	0.448	0.177	3.8239e-113	CD8 T	SAMD3	Patient 1_Day 7
6.56883e-10	0.4415	0.675	0.346	1.31377e-06	NK	SAMD3	Patient 1_Day 7
3.73853e-34	0.288253	0.407	0.169	7.47706e-31	CD8 T	SAMD3	Patient 1_Day 13
1.21084e-122	0.705828	0.483	0.02	2.42168e-119	CD8 T	SAMD3	Patient 2_Preinfusion
2.75498e-09	0.603914	0.405	0.062	5.50996e-06	NK	SAMD3	Patient 2_Preinfusion
7.59664e-219	0.723935	0.619	0.123	1.51933e-215	CD8 T	SAMD3	Patient 2_Day 31
1.10756e-14	0.459004	0.775	0.394	2.21512e-11	NK	SAMD3	Patient 2_Day 31
2.0261e-123	0.361793	0.22	0.014	4.05221e-120	CD8 T	SAMD3	Patient 3_Preinfusion
5.36848e-204	0.275766	0.315	0.11	1.0737e-200	CD8 T	SAMD3	Patient 3_Day 24
1.18282e-145	0.760913	0.432	0.046	2.36564e-142	CD8 T	SAMD3	Patient 4_Day 8
2.87763e-36	0.618287	0.524	0.109	5.75527e-33	NK	SAMD3	Patient 4_Day 8
0	0.700199	0.642	0.143	0	CD8 T	SAMD3	Patient 4_Day 21
9.10025e-18	0.485097	0.611	0.316	1.82005e-14	Gamma Delta T	SAMD3	Patient 4_Day 21
2.7303e-37	0.474319	0.613	0.305	5.46061e-34	NK	SAMD3	Patient 4_Day 21
3.90526e-12	0.212614	0.492	0.502	7.81052e-09	CD8 T	SAMD3	Patient 3_Day 24 CAR T
2.37462e-25	0.558142	0.481	0.058	4.74924e-22	Gamma Delta T	S1PR5	Healthy
1.55056e-244	0.721869	0.564	0.035	3.10112e-241	NK	S1PR5	Healthy
4.2643e-57	0.327752	0.232	0.008	8.52859e-54	CD8 T	S1PR5	Patient 2_Preinfusion
1.27103e-16	0.582576	0.459	0.025	2.54205e-13	NK	S1PR5	Patient 2_Preinfusion
7.72975e-63	0.273797	0.23	0.04	1.54595e-59	CD8 T	S1PR5	Patient 2_Day 31
3.51451e-06	0.50802	0.583	0.145	0.00702903	Gamma Delta T	S1PR5	Patient 2_Day 31
8.06811e-08	0.335369	0.343	0.142	0.000161362	NK	S1PR5	Patient 2_Day 31
1.30948e-41	0.494701	0.345	0.027	2.61896e-38	NK	S1PR5	Patient 4_Day 8
2.40865e-25	0.325886	0.211	0.069	4.81729e-22	NK	S1PR5	Patient 4_Day 21
1.25032e-149	0.43206	0.299	0.01	2.50064e-146	Monocytes	S100P	Patient 1_Preinfusion
2.87623e-36	1.23496	0.247	0.014	5.75246e-33	Gamma Delta T	S100B	Patient 3_Preinfusion
0	4.016	0.997	0.556	0	Monocytes	S100A9	Healthy
0	2.71557	0.999	0.343	0	Monocytes	S100A9	Patient 1_Preinfusion
0	4.0706	0.992	0.223	0	Monocytes	S100A9	Patient 1_Day 7
9.1337e-07	0.356174	0.778	0.212	0.00182674	DC	S100A9	Patient 1_Day 13
0	3.01399	0.994	0.114	0	Monocytes	S100A9	Patient 1_Day 13
0	2.83418	1	0.242	0	Monocytes	S100A9	Patient 2_Preinfusion
1.5728e-07	0.726537	0.676	0.189	0.000314559	Monocytes	S100A9	Patient 2_Day 24
0	4.03176	0.995	0.051	0	Monocytes	S100A9	Patient 2_Day 31
0	2.89043	1	0.305	0	Monocytes	S100A9	Patient 3_Preinfusion
0	3.14184	0.949	0.094	0	Monocytes	S100A9	Patient 3_Day 24
0	3.58771	0.999	0.218	0	Monocytes	S100A9	Patient 4_Preinfusion
0	2.87554	0.998	0.781	0	Monocytes	S100A9	Patient 4_Day 8
0	3.49825	0.964	0.08	0	Monocytes	S100A9	Patient 4_Day 21
1.38772e-16	0.267156	1	0.894	2.77545e-13	DC	S100A6	Healthy
0	1.57146	0.999	0.846	0	Monocytes	S100A6	Healthy
0	1.13292	0.999	0.904	0	Monocytes	S100A6	Patient 1_Preinfusion
1.80769e-10	0.337255	1	0.898	3.61537e-07	DC	S100A6	Patient 1_Day 7
0	1.63282	0.988	0.874	0	Monocytes	S100A6	Patient 1_Day 7
2.74625e-209	0.893765	1	0.891	5.49249e-206	Monocytes	S100A6	Patient 1_Day 13
0	0.919146	1	0.975	0	Monocytes	S100A6	Patient 2_Preinfusion
2.48792e-07	0.653576	0.853	0.609	0.000497585	Monocytes	S100A6	Patient 2_Day 24
0	1.15846	0.999	0.966	0	Monocytes	S100A6	Patient 2_Day 31
0	1.0924	1	0.904	0	Monocytes	S100A6	Patient 3_Preinfusion
6.22267e-15	0.240443	1	0.869	1.24453e-11	DC	S100A6	Patient 3_Day 24
0	1.19584	0.998	0.823	0	Monocytes	S100A6	Patient 3_Day 24
0	1.13263	1	0.91	0	Monocytes	S100A6	Patient 4_Preinfusion
0	1.36627	1	0.878	0	Monocytes	S100A6	Patient 4_Day 8
0	1.25367	1	0.931	0	Monocytes	S100A6	Patient 4_Day 21
1.56873e-47	0.214426	1	0.899	3.13747e-44	Monocytes	S100A6	Patient 3_Day 24 CAR T
0	1.15898	0.999	0.775	0	Monocytes	S100A4	Healthy
0	0.683704	0.999	0.819	0	Monocytes	S100A4	Patient 1_Preinfusion
0	0.763365	0.982	0.901	0	Monocytes	S100A4	Patient 1_Day 7
6.79484e-22	0.22764	0.994	0.955	1.35897e-18	Monocytes	S100A4	Patient 1_Day 13
6.93426e-64	0.261008	1	0.974	1.38685e-60	Monocytes	S100A4	Patient 2_Preinfusion
1.97201e-115	0.372714	0.999	0.977	3.94402e-112	Monocytes	S100A4	Patient 2_Day 31
0	0.577946	1	0.888	0	Monocytes	S100A4	Patient 3_Preinfusion
0	0.678549	0.997	0.919	0	Monocytes	S100A4	Patient 3_Day 24
0	0.563822	1	0.873	0	Monocytes	S100A4	Patient 4_Preinfusion
0	0.802626	1	0.902	0	Monocytes	S100A4	Patient 4_Day 8
0	0.611531	1	0.956	0	Monocytes	S100A4	Patient 4_Day 21
5.75177e-08	1.03006	0.778	0.388	0.000115035	Monocytes	S100A4	Patient 2_Day 24 CART
1.09158e-62	0.310328	0.997	0.918	2.18316e-59	Gamma Delta T	S100A4	Patient 3_Day 24 CAR T
4.12474e-27	0.306851	0.994	0.677	8.24949e-24	DC	S100A11	Healthy
0	1.42186	0.995	0.531	0	Monocytes	S100A11	Healthy
0	1.1725	0.998	0.691	0	Monocytes	S100A11	Patient 1_Preinfusion
9.35974e-20	0.635083	1	0.723	1.87195e-16	DC	S100A11	Patient 1_Day 7
0	1.79655	0.977	0.657	0	Monocytes	S100A11	Patient 1_Day 7
7.17368e-07	0.318246	0.944	0.382	0.00143474	DC	S100A11	Patient 1_Day 13
1.43764e-165	0.834302	0.934	0.314	2.87528e-162	Monocytes	S100A11	Patient 1_Day 13
1.52166e-229	0.792173	0.984	0.828	3.04332e-226	Monocytes	S100A11	Patient 2_Preinfusion
4.22798e-10	0.691053	0.706	0.178	8.45595e-07	Monocytes	S100A11	Patient 2_Day 24
0	1.20798	0.995	0.785	0	Monocytes	S100A11	Patient 2_Day 31
0	0.821308	0.976	0.691	0	Monocytes	S100A11	Patient 3_Preinfusion
4.49436e-23	0.269607	0.987	0.675	8.98873e-20	DC	S100A11	Patient 3_Day 24
0	1.2184	0.974	0.566	0	Monocytes	S100A11	Patient 3_Day 24
0	1.06431	0.981	0.582	0	Monocytes	S100A11	Patient 4_Preinfusion
0	1.6592	0.997	0.579	0	Monocytes	S100A11	Patient 4_Day 8
0	1.45545	0.999	0.777	0	Monocytes	S100A11	Patient 4_Day 21
1.78877e-07	0.762586	0.556	0.04	0.000357753	Monocytes	S100A11	Patient 2_Day 24 CART
1.38903e-37	0.211061	0.914	0.714	2.77807e-34	Monocytes	S100A11	Patient 3_Day 24 CAR T
2.57974e-80	0.946886	1	0.802	5.15949e-77	DC	S100A10	Healthy
0	0.733059	0.974	0.724	0	Monocytes	S100A10	Healthy
4.9706e-12	0.285023	1	0.965	9.9412e-09	DC	S100A10	Patient 1_Preinfusion
4.09343e-207	0.464135	0.997	0.883	8.18685e-204	Monocytes	S100A10	Patient 1_Preinfusion
1.43231e-18	0.631438	1	0.833	2.86463e-15	DC	S100A10	Patient 1_Day 7
0	0.894559	0.958	0.801	0	Monocytes	S100A10	Patient 1_Day 7
6.50108e-13	0.231348	0.95	0.83	1.30022e-09	CD4 T	S100A10	Patient 1_Day 7
2.8332e-36	0.337266	0.855	0.517	5.66639e-33	Monocytes	S100A10	Patient 1_Day 13
4.14792e-08	0.324704	1	0.989	8.29584e-05	DC	S100A10	Patient 2_Preinfusion
1.19776e-55	0.313237	0.994	0.969	2.39551e-52	Monocytes	S100A10	Patient 2_Preinfusion
1.39646e-10	0.532315	1	0.913	2.79291e-07	DC	S100A10	Patient 2_Day 31
6.80053e-90	0.429351	0.966	0.887	1.36011e-86	Monocytes	S100A10	Patient 2_Day 31
2.98297e-18	0.444762	0.981	0.911	5.96594e-15	CD4 T	S100A10	Patient 2_Day 31
3.27626e-36	0.220685	1	0.958	6.55252e-33	DC	S100A10	Patient 3_Preinfusion
0	0.490884	0.989	0.88	0	Monocytes	S100A10	Patient 3_Preinfusion
1.02018e-34	0.605675	0.993	0.775	2.04037e-31	DC	S100A10	Patient 3_Day 24
0	0.574217	0.947	0.713	0	Monocytes	S100A10	Patient 3_Day 24
4.49411e-45	0.367266	1	0.941	8.98821e-42	DC	S100A10	Patient 4_Preinfusion
5.51002e-267	0.340253	0.988	0.884	1.102e-263	Monocytes	S100A10	Patient 4_Preinfusion
1.68618e-09	0.370594	1	0.922	3.37236e-06	DC	S100A10	Patient 4_Day 8
1.12432e-220	0.663517	0.99	0.796	2.24863e-217	Monocytes	S100A10	Patient 4_Day 8
3.14648e-16	0.508634	1	0.944	6.29296e-13	DC	S100A10	Patient 4_Day 21
4.26856e-206	0.521961	0.991	0.908	8.53713e-203	Monocytes	S100A10	Patient 4_Day 21
1.82373e-18	0.267221	0.772	0.708	3.64747e-15	CD4 T	S100A10	Patient 3_Day 24 CAR T
3.96418e-76	0.439499	0.938	0.697	7.92836e-73	Gamma Delta T	S100A10	Patient 3_Day 24 CAR T
2.4676e-06	0.304581	1	0.977	0.0049352	Monocytes	S100A10	Patient 4_Day 8 CAR T
2.16484e-98	0.390378	0.454	0.256	4.32968e-95	CD8 T	RUNX3	Healthy
4.12245e-16	0.530752	0.716	0.284	8.24491e-13	Gamma Delta T	RUNX3	Healthy
6.66671e-131	0.687305	0.691	0.266	1.33334e-127	NK	RUNX3	Healthy
1.03861e-21	0.280432	0.302	0.169	2.07721e-18	CD8 T	RUNX3	Patient 1_Preinfusion
7.68956e-101	0.751996	0.505	0.259	1.53791e-97	CD8 T	RUNX3	Patient 1_Day 7
3.69683e-74	0.649832	0.542	0.189	7.39366e-71	CD8 T	RUNX3	Patient 2_Preinfusion
6.37696e-25	1.07638	0.703	0.218	1.27539e-21	NK	RUNX3	Patient 2_Preinfusion
1.67102e-123	0.503117	0.515	0.215	3.34205e-120	CD8 T	RUNX3	Patient 2_Day 31
1.07882e-08	0.320622	0.667	0.377	2.15764e-05	NK	RUNX3	Patient 2_Day 31
8.39658e-49	0.352681	0.283	0.113	1.67932e-45	CD8 T	RUNX3	Patient 3_Preinfusion
4.42814e-38	0.649301	0.32	0.122	8.85629e-35	NK	RUNX3	Patient 3_Preinfusion
9.33805e-30	0.20749	0.232	0.195	1.86761e-26	NK	RUNX3	Patient 3_Day 24
7.31524e-31	0.243139	0.237	0.172	1.46305e-27	CD8 T	RUNX3	Patient 4_Preinfusion
4.40641e-16	0.520127	0.369	0.178	8.81282e-13	Gamma Delta T	RUNX3	Patient 4_Preinfusion
1.21507e-10	0.363466	0.267	0.178	2.43015e-07	NK	RUNX3	Patient 4_Preinfusion
7.78059e-104	0.813646	0.557	0.323	1.55612e-100	CD8 T	RUNX3	Patient 4_Day 8
4.63341e-08	0.634916	0.692	0.369	9.26682e-05	Gamma Delta T	RUNX3	Patient 4_Day 8
4.95365e-30	0.623423	0.696	0.357	9.9073e-27	NK	RUNX3	Patient 4_Day 8
1.47506e-58	0.292617	0.366	0.222	2.95011e-55	CD8 T	RUNX3	Patient 4_Day 21
1.29801e-12	0.338641	0.411	0.27	2.59602e-09	Gamma Delta T	RUNX3	Patient 4_Day 21
2.31155e-36	0.419625	0.461	0.262	4.62311e-33	NK	RUNX3	Patient 4_Day 21
9.21525e-07	0.206905	0.344	0.344	0.00184305	CD8 T	RUNX3	Patient 3_Day 24 CAR T
2.16185e-57	0.539366	0.256	0	4.32369e-54	CD4 T	RTKN2	Patient 2_Preinfusion
2.58816e-97	0.356963	0.805	0.788	5.17631e-94	CD8 T	RSRP1	Healthy
4.1362e-62	0.716071	0.645	0.7	8.27239e-59	CD8 T	RSRP1	Patient 1_Preinfusion
1.02952e-79	1.30045	0.589	0.515	2.05904e-76	CD8 T	RSRP1	Patient 1_Day 7
1.43175e-23	0.21967	0.486	0.4	2.86349e-20	CD8 T	RSRP1	Patient 1_Day 13
6.43493e-14	0.379963	0.75	0.555	1.28699e-10	CD4 T	RSRP1	Patient 2_Preinfusion
1.68781e-43	0.501749	0.734	0.546	3.37562e-40	CD8 T	RSRP1	Patient 2_Preinfusion
7.01947e-09	0.610135	0.811	0.562	1.40389e-05	NK	RSRP1	Patient 2_Preinfusion
2.24738e-60	0.316234	0.695	0.656	4.49476e-57	CD8 T	RSRP1	Patient 2_Day 31
2.23883e-07	0.307087	0.794	0.675	0.000447766	NK	RSRP1	Patient 2_Day 31
3.54761e-17	0.281915	0.392	0.368	7.09522e-14	CD8 T	RSRP1	Patient 3_Preinfusion
9.51457e-21	0.290291	0.344	0.37	1.90291e-17	NK	RSRP1	Patient 3_Preinfusion
3.7431e-68	0.322481	0.47	0.384	7.4862e-65	CD8 T	RSRP1	Patient 3_Day 24
3.60185e-54	0.538887	0.371	0.344	7.2037e-51	CD8 T	RSRP1	Patient 4_Preinfusion
8.11129e-08	0.360971	0.36	0.346	0.000162226	NK	RSRP1	Patient 4_Preinfusion
4.07239e-130	0.867929	0.632	0.619	8.14478e-127	CD8 T	RSRP1	Patient 4_Day 8
2.88752e-13	0.336179	0.726	0.617	5.77503e-10	NK	RSRP1	Patient 4_Day 8
7.08484e-30	0.20524	0.576	0.641	1.41697e-26	NK	RSRP1	Patient 4_Day 21
3.10534e-29	0.562746	0.676	0.665	6.21068e-26	CD8 T	RSRP1	Patient 3_Day 24 CAR T
2.81979e-39	0.578544	0.281	0.302	5.63958e-36	CD8 T	RSF1	Patient 1_Day 7
1.07176e-22	0.318525	0.458	0.334	2.14352e-19	CD8 T	RSF1	Patient 2_Preinfusion
1.08199e-63	0.279388	0.463	0.413	2.16397e-60	CD8 T	RSF1	Patient 2_Day 31
6.81983e-35	0.2663	0.231	0.239	1.36397e-31	CD8 T	RSF1	Patient 4_Preinfusion
7.86565e-72	0.483144	0.347	0.349	1.57313e-68	CD8 T	RSF1	Patient 4_Day 8
2.34453e-08	0.254042	0.15	0.331	4.68907e-05	Megakaryocytes	RSF1	Patient 4_Day 21
4.91104e-16	0.341308	0.421	0.398	9.82208e-13	CD8 T	RSF1	Patient 3_Day 24 CAR T
7.88431e-183	0.261571	0.201	0.001	1.57686e-179	CD8 T	RRM2	Patient 3_Preinfusion
3.89238e-23	0.434287	0.36	0.075	7.78476e-20	CD8 T	RRM2	Patient 1_Product
3.91024e-06	0.360304	0.24	0.051	0.00782049	CD8 T	RRM2	Patient 1_Day 13 CAR T
0	0.73007	1	0.962	0	CD4 T	RPSA	Healthy
1.26864e-227	0.463031	0.999	0.968	2.53728e-224	B cells	RPSA	Healthy
0	1.30036	0.999	0.918	0	CD4 T	RPSA	Patient 1_Preinfusion
2.7973e-86	0.486707	0.848	0.937	5.59459e-83	CD8 T	RPSA	Patient 1_Preinfusion
9.55842e-43	0.515666	0.981	0.873	1.91168e-39	CD4 T	RPSA	Patient 1_Day 7
6.70104e-125	0.387215	0.879	0.873	1.34021e-121	CD8 T	RPSA	Patient 1_Day 7
1.1586e-07	0.240404	0.875	0.706	0.000231721	CD4 T	RPSA	Patient 1_Day 13
1.1882e-17	0.510011	1	0.902	2.3764e-14	DC	RPSA	Patient 2_Preinfusion
2.10291e-138	1.14262	0.994	0.9	4.20582e-135	CD4 T	RPSA	Patient 2_Preinfusion
6.30105e-121	0.738746	0.987	0.896	1.26021e-117	CD8 T	RPSA	Patient 2_Preinfusion
6.35648e-07	0.380906	1	0.955	0.0012713	DC	RPSA	Patient 2_Day 31
2.77345e-52	0.64422	1	0.954	5.5469e-49	CD4 T	RPSA	Patient 2_Day 31
1.02401e-143	0.388696	0.973	0.933	2.04801e-140	CD8 T	RPSA	Patient 2_Day 31
2.08438e-113	0.404302	0.994	0.775	4.16876e-110	DC	RPSA	Patient 3_Preinfusion
0	1.1464	0.984	0.762	0	CD4 T	RPSA	Patient 3_Preinfusion
2.00317e-189	0.67565	0.919	0.778	4.00634e-186	CD8 T	RPSA	Patient 3_Preinfusion
1.09182e-16	0.581962	0.948	0.787	2.18363e-13	Gamma Delta T	RPSA	Patient 3_Preinfusion
1.51532e-19	0.519804	0.885	0.787	3.03064e-16	NK	RPSA	Patient 3_Preinfusion
3.72025e-177	0.44694	0.991	0.869	7.44051e-174	CD4 T	RPSA	Patient 3_Day 24
4.19205011868983e-316	0.344829	0.899	0.851	8.38410023737965e-313	CD8 T	RPSA	Patient 3_Day 24
2.33359e-40	0.273798	0.994	0.796	4.66719e-37	DC	RPSA	Patient 4_Preinfusion
0	0.914212	0.981	0.735	0	CD4 T	RPSA	Patient 4_Preinfusion
3.15945e-137	0.540082	0.847	0.797	6.31891e-134	CD8 T	RPSA	Patient 4_Preinfusion
1.93621e-10	0.477872	0.938	0.802	3.87242e-07	Gamma Delta T	RPSA	Patient 4_Preinfusion
2.3346e-06	0.364013	0.88	0.802	0.00466919	NK	RPSA	Patient 4_Preinfusion
2.25052e-19	0.466781	1	0.87	4.50105e-16	DC	RPSA	Patient 4_Day 8
4.48855e-66	0.964857	0.991	0.87	8.9771e-63	CD4 T	RPSA	Patient 4_Day 8
6.57151e-134	0.460615	0.811	0.891	1.3143e-130	CD8 T	RPSA	Patient 4_Day 8
3.46565e-17	0.374347	0.935	0.871	6.93129e-14	NK	RPSA	Patient 4_Day 8
4.54424e-12	0.333114	1	0.973	9.08848e-09	DC	RPSA	Patient 4_Day 21
8.26909e-129	0.591811	0.99	0.972	1.65382e-125	CD4 T	RPSA	Patient 4_Day 21
4.14276e-189	0.367412	0.986	0.966	8.28553e-186	CD8 T	RPSA	Patient 4_Day 21
1.28999e-20	0.255321	0.992	0.972	2.57998e-17	NK	RPSA	Patient 4_Day 21
1.89934e-44	0.29869	0.255	0.144	3.79868e-41	CD4 T	RPS6KA5	Patient 1_Preinfusion
1.42086e-16	0.377954	0.356	0.119	2.84171e-13	CD4 T	RPS6KA5	Patient 2_Preinfusion
9.82883e-100	0.528743	0.959	0.898	1.96577e-96	CD4 T	RPS27L	Patient 1_Preinfusion
3.28685e-36	0.445355	0.855	0.912	6.5737e-33	CD8 T	RPS27L	Patient 1_Preinfusion
2.03185e-67	0.376233	0.548	0.681	4.06369e-64	CD8 T	RPS27L	Patient 1_Day 7
5.91762e-09	0.292121	0.925	0.835	1.18352e-05	CD4 T	RPS27L	Patient 2_Preinfusion
[truncated: 7,185 more rows]

## Sheet: DPE canonical cell types
p_val	avg_logFC	pct.1	pct.2	p_val_adj	cluster	gene	sample
0	1.42158	1	0.992	0	Monocytes	CD11b-Protein	Patient 1_Preinfusion
0	1.43561	0.999	0.897	0	Monocytes	CD11b-Protein	Patient 1_Day 7
0	1.50282	1	0.992	0	Monocytes	CD11b-Protein	Patient 2_Preinfusion
0	1.71137	1	0.963	0	Monocytes	CD11b-Protein	Patient 2_Day 31
0	0.456881	0.994	0.83	0	Monocytes	CD11b-Protein	Patient 3_Preinfusion
0	0.565479	0.988	0.902	0	Monocytes	CD11b-Protein	Patient 3_Day 24
0	0.537526	0.995	0.876	0	Monocytes	CD11b-Protein	Patient 4_Preinfusion
0	0.99454	0.998	0.956	0	Monocytes	CD11b-Protein	Patient 4_Day 8
0	1.11402	1	0.999	0	Monocytes	CD11b-Protein	Patient 4_Day 21
3.38566e-216	1.15031	1	0.526	1.28655e-214	Monocytes	CD11b-Protein	Patient 1_Day 13
6.08539e-08	0.471981	0.471	0.101	2.31245e-06	Monocytes	CD11b-Protein	Patient 2_Day 24
0	1.10983	1	0.995	0	Monocytes	CD11c-Protein	Patient 1_Preinfusion
0	1.16144	1	0.999	0	Monocytes	CD11c-Protein	Patient 1_Day 7
0	1.76392	1	0.998	0	Monocytes	CD11c-Protein	Patient 2_Day 31
0	0.256374	1	1	0	Monocytes	CD11c-Protein	Patient 3_Preinfusion
0	1.07804	1	1	0	Monocytes	CD11c-Protein	Patient 3_Day 24
0	0.417694	1	0.999	0	Monocytes	CD11c-Protein	Patient 4_Preinfusion
0	0.968439	1	0.998	0	Monocytes	CD11c-Protein	Patient 4_Day 8
0	1.33412	1	1	0	Monocytes	CD11c-Protein	Patient 4_Day 21
8.56477e-214	0.968466	1	0.995	3.34026e-212	Monocytes	CD11c-Protein	Patient 2_Preinfusion
6.11758e-192	1.42083	1	1	2.32468e-190	Monocytes	CD11c-Protein	Patient 1_Day 13
3.35793e-137	0.307918	1	1	1.34317e-135	DC	CD11c-Protein	Patient 3_Preinfusion
1.12636e-101	0.432771	1	1	4.50543e-100	DC	CD11c-Protein	Patient 4_Preinfusion
7.57278e-65	0.930962	1	1	3.02911e-63	DC	CD11c-Protein	Patient 3_Day 24
7.80907e-36	1.32912	1	0.999	3.12363e-34	DC	CD11c-Protein	Patient 1_Day 7
7.78919e-26	0.738321	1	1	3.11568e-24	DC	CD11c-Protein	Patient 4_Day 21
2.20447e-21	1.35635	1	0.999	8.59743e-20	DC	CD11c-Protein	Patient 2_Day 31
4.8072e-18	0.2424	1	1	1.82673e-16	Gamma Delta T	CD11c-Protein	Patient 1_Day 13
6.80836e-16	1.43439	1	0.574	2.58718e-14	Monocytes	CD11c-Protein	Patient 2_Day 24
1.64444e-14	0.587006	1	0.999	6.41333e-13	DC	CD11c-Protein	Patient 2_Preinfusion
8.81466e-13	0.383859	1	0.999	3.52587e-11	DC	CD11c-Protein	Patient 1_Preinfusion
2.13168e-10	1.26867	1	1	8.10039e-09	DC	CD11c-Protein	Patient 1_Day 13
5.53422e-10	0.34404	1	0.999	2.21369e-08	DC	CD11c-Protein	Patient 4_Day 8
2.95734e-06	0.482876	0.972	0.968	0.000118294	Gamma Delta T	CD11c-Protein	Patient 4_Product
2.28735e-05	0.532526	1	0.989	0.000914938	NK	CD11c-Protein	Patient 1_Product
4.28777e-05	0.33184	0.978	0.5	0.00162935	CD8 T	CD11c-Protein	Patient 2_Day 24 CART
4.38389e-46	0.31295	1	0.999	1.75356e-44	Monocytes	CD127-Protein	Patient 4_Day 21
5.70274e-30	0.345476	1	0.994	2.22407e-28	NK	CD127-Protein	Patient 2_Day 31
3.18996e-21	0.267023	1	0.993	1.21218e-19	NK	CD127-Protein	Patient 1_Day 13
4.3582e-19	0.572315	1	0.996	1.6997e-17	NK	CD127-Protein	Patient 2_Preinfusion
2.39235e-15	0.427915	0.916	0.719	9.5694e-14	CD4 T	CD127-Protein	Patient 1_Product
3.72625e-12	0.343038	0.753	0.596	1.4905e-10	CD4 T	CD127-Protein	Patient 4_Product
3.58439e-09	0.585368	0.765	0.272	1.36207e-07	Monocytes	CD127-Protein	Patient 2_Day 24
2.48698e-07	0.314025	0.941	0.827	9.9479e-06	CD4 T	CD127-Protein	Patient 3_Product
4.82429e-12	0.228919	1	1	1.92972e-10	Megakaryocytes	CD137-Protein	Patient 4_Day 8
9.31901e-08	0.248321	1	1	3.7276e-06	Megakaryocytes	CD137-Protein	Patient 4_Day 21
9.55098e-06	0.32665	1	0.988	0.000382039	Monocytes	CD137-Protein	Patient 4_Day 8 CAR T
0	0.442969	0.999	0.921	0	Monocytes	CD141-Protein	Patient 1_Day 7
0	0.457395	1	1	0	Monocytes	CD141-Protein	Patient 4_Day 21
5.34423e-274	0.353578	1	0.985	2.13769e-272	Monocytes	CD141-Protein	Patient 4_Day 8
1.67398e-251	0.286771	1	0.923	6.6959e-250	Monocytes	CD141-Protein	Patient 1_Preinfusion
2.82954e-100	0.26031	1	0.94	1.07523e-98	Monocytes	CD141-Protein	Patient 1_Day 13
2.97063e-50	0.210182	1	0.998	1.18825e-48	DC	CD141-Protein	Patient 4_Preinfusion
3.13111e-38	0.373162	1	0.978	1.25244e-36	DC	CD141-Protein	Patient 1_Preinfusion
1.3031e-31	0.886088	1	0.937	5.21239e-30	DC	CD141-Protein	Patient 1_Day 7
1.88156e-28	0.55925	1	1	7.52623e-27	DC	CD141-Protein	Patient 4_Day 21
1.24412e-25	0.52469	1	0.974	4.85207e-24	DC	CD141-Protein	Patient 2_Preinfusion
2.18097e-25	0.493118	1	0.995	8.72388e-24	DC	CD141-Protein	Patient 4_Day 8
1.89024e-21	0.471379	1	0.961	7.37195e-20	DC	CD141-Protein	Patient 2_Day 31
1.25696e-09	0.544564	1	0.947	4.77644e-08	DC	CD141-Protein	Patient 1_Day 13
4.57176e-08	0.818986	1	1	1.8287e-06	B cells	CD141-Protein	Patient 4_Day 21
1.90127e-06	0.251282	1	0.998	7.60508e-05	Megakaryocytes	CD141-Protein	Patient 4_Preinfusion
3.80515e-05	0.720947	1	0.962	0.00148401	B cells	CD141-Protein	Patient 2_Day 31
9.90538e-05	0.228643	1	0.962	0.0038631	Megakaryocytes	CD141-Protein	Patient 2_Day 31
0	1.36345	1	0.996	0	Monocytes	CD14-Protein	Patient 1_Preinfusion
0	1.45725	1	0.993	0	Monocytes	CD14-Protein	Patient 1_Day 7
0	2.03881	1	1	0	Monocytes	CD14-Protein	Patient 2_Preinfusion
0	2.62626	1	0.996	0	Monocytes	CD14-Protein	Patient 2_Day 31
0	0.496265	1	0.994	0	Monocytes	CD14-Protein	Patient 3_Preinfusion
0	0.862523	0.998	0.994	0	Monocytes	CD14-Protein	Patient 3_Day 24
0	0.637367	1	0.995	0	Monocytes	CD14-Protein	Patient 4_Preinfusion
0	1.34258	1	0.997	0	Monocytes	CD14-Protein	Patient 4_Day 8
0	1.66155	1	1	0	Monocytes	CD14-Protein	Patient 4_Day 21
1.87719e-200	1.93985	1	0.988	7.13332e-199	Monocytes	CD14-Protein	Patient 1_Day 13
8.96341e-11	1.72243	0.794	0.32	3.4061e-09	Monocytes	CD14-Protein	Patient 2_Day 24
2.04152e-19	0.235915	0.579	0.232	8.16607e-18	CD4 T	CD154-Protein	Patient 1_Product
5.56734e-15	0.280979	0.965	0.973	2.22694e-13	Megakaryocytes	CD154-Protein	Patient 1_Preinfusion
6.00288e-13	0.371505	1	1	2.40115e-11	Megakaryocytes	CD154-Protein	Patient 4_Day 21
9.0136e-08	0.230291	0.559	0.308	3.60544e-06	CD4 T	CD154-Protein	Patient 3_Product
9.01851e-07	0.395443	1	0.972	3.51722e-05	Megakaryocytes	CD154-Protein	Patient 2_Preinfusion
0.000163874	0.356556	1	0.989	0.00639108	Megakaryocytes	CD154-Protein	Patient 2_Day 31
3.08612e-249	0.213723	0.998	0.998	1.20359e-247	CD8 T	CD161-Protein	Patient 2_Day 31
1.03297e-138	0.21573	1	1	4.13187e-137	NK	CD161-Protein	Patient 4_Day 21
6.95072e-81	0.208436	1	0.999	2.71078e-79	CD8 T	CD161-Protein	Patient 2_Preinfusion
4.56987e-37	0.235326	0.994	0.999	1.78225e-35	CD4 T	CD161-Protein	Patient 2_Preinfusion
4.44651e-30	0.263298	1	0.998	1.73414e-28	NK	CD161-Protein	Patient 2_Day 31
3.31575e-17	0.306984	1	0.999	1.29314e-15	NK	CD161-Protein	Patient 2_Preinfusion
0	1.09492	1	1	0	Monocytes	CD16-Protein	Patient 3_Day 24
4.07648e-273	1.15511	1	1	1.63059e-271	Monocytes	CD16-Protein	Patient 4_Day 21
1.54932e-166	0.36877	1	1	6.19726e-165	NK	CD16-Protein	Patient 3_Day 24
1.34416e-163	0.349896	1	1	5.37664e-162	Monocytes	CD16-Protein	Patient 1_Preinfusion
3.28142e-128	1.61737	1	1	1.27975e-126	Monocytes	CD16-Protein	Patient 2_Day 31
1.81284e-127	1.06448	1	1	7.25135e-126	Monocytes	CD16-Protein	Patient 1_Day 7
5.13251e-56	0.818054	1	1	2.05301e-54	NK	CD16-Protein	Patient 4_Day 21
3.65992e-40	0.70451	1	0.998	1.46397e-38	Monocytes	CD16-Protein	Patient 4_Day 8
1.94494e-39	0.464129	1	1	7.77977e-38	NK	CD16-Protein	Patient 3_Preinfusion
6.56736e-37	1.48976	1	1	2.56127e-35	NK	CD16-Protein	Patient 2_Day 31
9.64739e-36	0.308942	1	0.999	3.85896e-34	NK	CD16-Protein	Patient 4_Day 8
3.67538e-32	2.13165	1	1	1.39665e-30	NK	CD16-Protein	Patient 1_Day 13
3.5957e-26	1.22423	1	1	1.43828e-24	NK	CD16-Protein	Patient 1_Day 7
1.8379e-22	0.71206	1	1	6.98401e-21	Gamma Delta T	CD16-Protein	Patient 1_Day 13
2.25844e-21	2.29565	1	1	8.80793e-20	NK	CD16-Protein	Patient 2_Preinfusion
1.78114e-15	0.350747	1	1	7.12454e-14	NK	CD16-Protein	Patient 4_Preinfusion
1.07721e-11	0.234882	1	1	4.30883e-10	Gamma Delta T	CD16-Protein	Patient 3_Preinfusion
4.42187e-09	2.22731	0.971	0.598	1.68031e-07	Monocytes	CD16-Protein	Patient 2_Day 24
7.58409e-05	1.11507	1	0.967	0.00303364	Gamma Delta T	CD16-Protein	Patient 4_Day 8 CAR T
4.56005e-79	0.230106	1	1	1.82402e-77	CD8 T	CD183-Protein	Patient 1_Preinfusion
3.29969e-22	0.341172	1	1	1.31987e-20	Megakaryocytes	CD183-Protein	Patient 1_Preinfusion
9.21679e-18	0.400959	1	1	3.59455e-16	NK	CD183-Protein	Patient 2_Preinfusion
6.9505e-13	0.224603	1	1	2.7802e-11	Megakaryocytes	CD183-Protein	Patient 4_Day 8
1.79899e-11	0.881539	1	1	7.19597e-10	B cells	CD183-Protein	Patient 4_Day 21
1.11911e-05	0.313643	1	1	0.000436453	Megakaryocytes	CD183-Protein	Patient 2_Preinfusion
5.6114e-05	0.474114	0.987	0.5	0.00213233	CD8 T	CD183-Protein	Patient 2_Day 24 CART
8.43915e-05	0.204136	1	1	0.00337566	Gamma Delta T	CD183-Protein	Patient 1_Preinfusion
5.59092e-247	0.208543	0.999	1	2.18046e-245	CD8 T	CD194-Protein	Patient 2_Day 31
1.29544e-21	0.328159	1	0.998	5.18175e-20	Megakaryocytes	CD194-Protein	Patient 1_Preinfusion
5.26155e-14	0.213654	1	0.998	2.10462e-12	Megakaryocytes	CD194-Protein	Patient 4_Day 8
1.77375e-11	0.327283	1	1	7.09501e-10	Megakaryocytes	CD194-Protein	Patient 4_Day 21
6.95789e-08	0.253902	1	0.999	2.78315e-06	Megakaryocytes	CD194-Protein	Patient 1_Day 7
1.7913e-06	0.444846	1	1	6.98605e-05	Megakaryocytes	CD194-Protein	Patient 2_Preinfusion
5.50216e-05	0.314638	1	0.999	0.00214584	Megakaryocytes	CD194-Protein	Patient 2_Day 31
0.000188558	0.412253	0.98	0.5	0.0071652	CD8 T	CD194-Protein	Patient 2_Day 24 CART
1.44089e-09	0.245769	1	1	5.76357e-08	Megakaryocytes	CD196-Protein	Patient 4_Day 21
1.48113e-05	0.32696	1	0.999	0.00057764	Megakaryocytes	CD196-Protein	Patient 2_Preinfusion
7.75608e-143	0.354616	0.996	0.999	3.10243e-141	CD4 T	CD197-Protein	Patient 1_Preinfusion
9.90137e-29	0.233321	1	0.998	3.86153e-27	Monocytes	CD197-Protein	Patient 2_Preinfusion
4.55126e-15	0.201215	1	0.998	1.8205e-13	Megakaryocytes	CD197-Protein	Patient 1_Preinfusion
2.07677e-11	0.216674	1	0.999	8.30709e-10	Megakaryocytes	CD197-Protein	Patient 4_Day 8
4.27412e-05	2.03863	1	0.999	0.00166691	B cells	CD197-Protein	Patient 2_Day 31
0.000203414	0.238906	1	1	0.0042717	NK	CD197-Protein	Patient 2_Product
4.84351e-19	0.216837	1	0.797	1.88897e-17	NK	CD19-Protein	Patient 2_Preinfusion
0.00012617	0.257755	1	0.816	0.00492065	B cells	CD19-Protein	Patient 2_Day 31
2.12175e-46	1.37469	1	1	8.487e-45	DC	CD206-Protein	Patient 4_Day 21
6.43208e-23	0.519197	1	0.996	2.57283e-21	DC	CD206-Protein	Patient 1_Preinfusion
3.26558e-17	0.507371	1	0.994	1.27358e-15	DC	CD206-Protein	Patient 2_Preinfusion
3.04316e-11	0.269577	1	0.999	1.21727e-09	DC	CD206-Protein	Patient 3_Day 24
3.30031e-11	0.435983	1	0.998	1.32013e-09	DC	CD206-Protein	Patient 4_Day 8
3.45066e-10	0.745212	1	0.997	1.38026e-08	DC	CD206-Protein	Patient 1_Day 7
1.64721e-05	1.0788	1	0.996	0.000642411	DC	CD206-Protein	Patient 2_Day 31
0	0.26553	1	1	0	CD8 T	CD223-Protein	Patient 2_Day 31
9.06521e-85	0.232807	1	1	3.53543e-83	CD8 T	CD223-Protein	Patient 2_Preinfusion
4.72207e-19	0.290323	1	0.999	1.88883e-17	Megakaryocytes	CD223-Protein	Patient 1_Preinfusion
3.79002e-15	0.257165	1	1	1.51601e-13	Megakaryocytes	CD223-Protein	Patient 4_Day 8
4.0093e-10	0.313021	1	1	1.60372e-08	Megakaryocytes	CD223-Protein	Patient 4_Day 21
0.000160868	0.321929	1	1	0.00627384	Megakaryocytes	CD223-Protein	Patient 2_Preinfusion
9.66856e-230	0.66009	0.97	0.926	3.86742e-228	CD4 T	CD25-Protein	Patient 1_Preinfusion
4.76084e-137	0.858578	0.998	1	1.90433e-135	CD4 T	CD25-Protein	Patient 4_Day 21
9.77811e-45	0.53035	0.938	0.915	3.81346e-43	CD4 T	CD25-Protein	Patient 2_Preinfusion
5.38629e-20	0.420905	0.973	0.989	2.15452e-18	CD4 T	CD25-Protein	Patient 4_Day 8
6.43485e-18	0.352545	0.942	0.946	2.50959e-16	CD4 T	CD25-Protein	Patient 2_Day 31
1.86364e-16	0.244697	0.993	0.97	7.08183e-15	CD4 T	CD25-Protein	Patient 1_Day 13
1.86474e-14	0.326316	0.939	0.93	7.45896e-13	CD4 T	CD25-Protein	Patient 1_Day 7
2.65801e-05	0.559869	1	0.995	0.000558182	DC	CD25-Protein	Patient 2_Product
3.60461e-05	0.432061	0.981	0.966	0.00144185	Monocytes	CD25-Protein	Patient 4_Product
4.20144e-35	0.666931	1	1	1.68058e-33	Megakaryocytes	CD274-Protein	Patient 1_Preinfusion
6.63053e-15	0.286877	1	0.999	2.65221e-13	Megakaryocytes	CD274-Protein	Patient 4_Day 8
4.25803e-14	0.588196	1	1	1.70321e-12	Megakaryocytes	CD274-Protein	Patient 4_Preinfusion
4.98517e-14	0.631964	1	1	1.99407e-12	Megakaryocytes	CD274-Protein	Patient 4_Day 21
1.39521e-13	0.408386	1	1	5.58083e-12	Megakaryocytes	CD274-Protein	Patient 1_Day 7
7.86596e-10	0.244094	1	1	3.14638e-08	Megakaryocytes	CD274-Protein	Patient 3_Preinfusion
1.82243e-08	0.643986	1	1	7.10748e-07	Megakaryocytes	CD274-Protein	Patient 2_Day 31
3.11136e-07	0.981251	1	0.999	1.21343e-05	Megakaryocytes	CD274-Protein	Patient 2_Preinfusion
0	0.341021	1	0.999	0	CD8 T	CD279-Protein	Patient 2_Day 31
0	0.415604	1	1	0	CD8 T	CD279-Protein	Patient 4_Day 21
1.93061e-220	0.405865	0.996	0.999	7.72245e-219	CD8 T	CD279-Protein	Patient 4_Day 8
4.82329e-220	0.258049	0.999	0.998	1.92932e-218	CD8 T	CD279-Protein	Patient 1_Day 7
1.18716e-177	0.682642	0.997	0.997	4.74864e-176	CD4 T	CD279-Protein	Patient 1_Preinfusion
1.03753e-116	0.575364	0.998	0.997	4.15011e-115	CD8 T	CD279-Protein	Patient 1_Preinfusion
2.25354e-105	0.447101	1	1	9.01416e-104	CD4 T	CD279-Protein	Patient 4_Day 21
6.62193e-102	0.294643	1	1	2.58255e-100	CD8 T	CD279-Protein	Patient 2_Preinfusion
1.91214e-41	0.22027	1	1	7.45733e-40	CD4 T	CD279-Protein	Patient 2_Preinfusion
6.12492e-32	0.261433	1	0.999	2.44997e-30	Gamma Delta T	CD279-Protein	Patient 1_Day 7
1.5244e-23	0.285136	1	0.999	6.09758e-22	CD4 T	CD279-Protein	Patient 1_Day 7
4.7762e-18	0.3508	1	0.998	1.91048e-16	CD4 T	CD279-Protein	Patient 4_Day 8
2.46385e-15	0.329735	0.56	0.299	9.85539e-14	CD4 T	CD279-Protein	Patient 4_Product
1.0002e-06	0.581714	0.495	0.36	4.0008e-05	CD4 T	CD279-Protein	Patient 1_Product
1.53888e-06	0.426736	1	1	6.00162e-05	Megakaryocytes	CD279-Protein	Patient 2_Preinfusion
2.49282e-05	0.20566	0.882	0.776	0.00099713	CD4 T	CD279-Protein	Patient 3_Product
4.51802e-05	0.307006	1	1	0.00176203	Megakaryocytes	CD279-Protein	Patient 2_Day 31
0.000103084	0.311334	1	0.997	0.00412335	Gamma Delta T	CD279-Protein	Patient 1_Preinfusion
0.000148731	0.21985	0.457	0.304	0.00594923	Monocytes	CD279-Protein	Patient 4_Product
0	1.68582	0.992	0.947	0	CD4 T	CD27-Protein	Patient 1_Preinfusion
0	0.299959	1	0.998	0	CD4 T	CD27-Protein	Patient 3_Preinfusion
0	0.58425	1	0.999	0	CD8 T	CD27-Protein	Patient 3_Day 24
0	0.257919	1	0.999	0	CD4 T	CD27-Protein	Patient 4_Preinfusion
1.03551e-307	0.420438	1	1	4.03851e-306	CD8 T	CD27-Protein	Patient 2_Day 31
7.14033e-141	1.51734	1	1	2.85613e-139	CD4 T	CD27-Protein	Patient 4_Day 21
1.03544e-138	0.396491	1	0.999	4.14175e-137	CD4 T	CD27-Protein	Patient 3_Day 24
1.05048e-124	0.783672	0.992	0.997	4.2019e-123	CD8 T	CD27-Protein	Patient 4_Day 8
1.8681e-100	0.219996	0.997	0.999	7.28558e-99	CD8 T	CD27-Protein	Patient 2_Preinfusion
5.33778e-89	1.34907	1	0.999	2.08173e-87	CD4 T	CD27-Protein	Patient 2_Preinfusion
2.63947e-75	0.330859	1	1	1.05579e-73	CD8 T	CD27-Protein	Patient 4_Day 21
4.26918e-69	0.325166	0.955	0.971	1.70767e-67	CD8 T	CD27-Protein	Patient 1_Day 7
1.58336e-46	1.16625	1	1	6.17512e-45	CD4 T	CD27-Protein	Patient 2_Day 31
1.95839e-44	1.18648	1	0.996	7.83356e-43	CD4 T	CD27-Protein	Patient 4_Day 8
1.51172e-40	0.493228	0.935	0.955	6.04688e-39	CD8 T	CD27-Protein	Patient 1_Preinfusion
4.00055e-33	0.738873	0.985	0.96	1.60022e-31	CD4 T	CD27-Protein	Patient 1_Day 7
2.70065e-29	0.681873	1	1	1.02625e-27	CD4 T	CD27-Protein	Patient 1_Day 13
6.65589e-09	0.359851	0.99	0.99	2.66236e-07	Monocytes	CD27-Protein	Patient 4_Product
8.36512e-09	0.481464	0.98	0.991	3.34605e-07	CD4 T	CD27-Protein	Patient 4_Product
1.40316e-08	0.541964	0.981	0.992	5.61264e-07	CD4 T	CD27-Protein	Patient 1_Product
1.57932e-08	0.750902	0.985	0.991	6.31728e-07	CD4 T	CD27-Protein	Patient 3_Product
9.11125e-05	0.581972	1	0.99	0.0036445	Monocytes	CD27-Protein	Patient 3_Product
0.000181299	0.272769	1	0.997	0.00725197	Monocytes	CD27-Protein	Patient 4_Day 8 CAR T
0	0.880727	1	0.989	0	CD4 T	CD28-Protein	Patient 1_Preinfusion
5.11253e-280	0.249353	1	0.998	2.04501e-278	CD4 T	CD28-Protein	Patient 3_Day 24
4.13702e-259	1.10119	0.998	1	1.65481e-257	CD4 T	CD28-Protein	Patient 4_Day 21
1.17734e-111	0.644244	0.992	0.989	4.70937e-110	CD4 T	CD28-Protein	Patient 1_Day 7
4.65919e-100	1.12544	1	0.999	1.81708e-98	CD4 T	CD28-Protein	Patient 2_Preinfusion
1.0716e-80	0.979466	1	1	4.17924e-79	CD4 T	CD28-Protein	Patient 2_Day 31
4.52676e-77	0.669327	1	1	1.72017e-75	CD4 T	CD28-Protein	Patient 1_Day 13
8.77467e-63	0.663998	1	0.995	3.50987e-61	CD4 T	CD28-Protein	Patient 4_Day 8
1.8671e-57	0.365946	0.972	0.992	7.46842e-56	CD8 T	CD28-Protein	Patient 1_Preinfusion
4.28986e-47	0.265722	1	0.998	1.71594e-45	CD4 T	CD28-Protein	Patient 3_Day 24 CAR T
6.14454e-17	0.521008	0.907	0.789	2.45782e-15	CD4 T	CD28-Protein	Patient 1_Product
4.34217e-15	0.370561	0.9	0.786	1.73687e-13	CD4 T	CD28-Protein	Patient 4_Product
2.60339e-07	0.386617	0.941	0.88	1.04136e-05	CD4 T	CD28-Protein	Patient 3_Product
3.70007e-07	0.319867	1	1	1.40602e-05	CD4 T	CD28-Protein	Patient 1_Day 13 CAR T
5.08858e-06	0.340275	1	1	0.000203543	Megakaryocytes	CD28-Protein	Patient 4_Day 21
2.21084e-05	0.74251	1	0.975	0.000884337	CD4 T	CD28-Protein	Patient 4_Day 8 CAR T
2.92642e-05	0.318991	1	0.999	0.00114131	Megakaryocytes	CD28-Protein	Patient 2_Preinfusion
3.01875e-05	0.345018	1	0.971	0.0012075	Monocytes	CD28-Protein	Patient 4_Day 8 CAR T
0	0.700075	1	0.999	0	Monocytes	CD38-Protein	Patient 1_Preinfusion
0	0.311327	1	0.999	0	Monocytes	CD38-Protein	Patient 4_Preinfusion
1.04334e-292	0.580576	1	1	4.17336e-291	CD8 T	CD38-Protein	Patient 4_Day 21
2.41628e-128	0.409208	1	1	9.66511e-127	CD8 T	CD38-Protein	Patient 4_Day 8
5.06457e-128	0.308338	1	1	2.02583e-126	CD8 T	CD38-Protein	Patient 1_Day 7
4.00042e-112	0.762832	1	1	1.60017e-110	NK	CD38-Protein	Patient 4_Day 21
4.10809e-104	0.254078	1	1	1.60216e-102	CD8 T	CD38-Protein	Patient 2_Day 31
1.56064e-97	0.273915	1	1	6.24257e-96	NK	CD38-Protein	Patient 3_Day 24
8.22582e-94	0.23934	1	1	3.29033e-92	CD8 T	CD38-Protein	Patient 3_Day 24 CAR T
3.93992e-55	0.55996	1	1	1.57597e-53	NK	CD38-Protein	Patient 4_Day 8
3.98842e-35	0.597783	1	1	1.55549e-33	NK	CD38-Protein	Patient 2_Day 31
8.36058e-16	0.626047	1	1	3.26063e-14	NK	CD38-Protein	Patient 2_Preinfusion
2.71476e-11	0.452874	1	1	1.0859e-09	Gamma Delta T	CD38-Protein	Patient 4_Day 8
2.21235e-07	0.211939	1	1	8.84938e-06	Gamma Delta T	CD38-Protein	Patient 4_Day 21
0	1.83872	1	0.986	0	CD4 T	CD3-Protein	Patient 1_Preinfusion
0	1.67358	1	1	0	CD8 T	CD3-Protein	Patient 2_Day 31
0	0.414703	1	0.998	0	CD4 T	CD3-Protein	Patient 3_Preinfusion
0	0.472103	1	0.999	0	CD8 T	CD3-Protein	Patient 3_Day 24
0	0.406575	0.999	0.998	0	CD4 T	CD3-Protein	Patient 4_Preinfusion
0	1.28314	0.999	0.997	0	CD8 T	CD3-Protein	Patient 4_Day 8
0	1.21566	1	1	0	CD8 T	CD3-Protein	Patient 4_Day 21
4.55586e-305	0.642698	1	0.999	1.82234e-303	CD8 T	CD3-Protein	Patient 1_Day 7
1.16638e-237	0.316621	0.998	0.998	4.66553e-236	CD8 T	CD3-Protein	Patient 3_Preinfusion
6.48714e-232	0.322365	1	0.998	2.59486e-230	CD8 T	CD3-Protein	Patient 4_Preinfusion
7.99176e-189	0.372679	1	0.999	3.19671e-187	CD4 T	CD3-Protein	Patient 3_Day 24
2.43027e-165	1.83291	1	0.999	9.47806e-164	CD8 T	CD3-Protein	Patient 2_Preinfusion
4.05806e-122	1.10379	0.992	0.988	1.62322e-120	CD8 T	CD3-Protein	Patient 1_Preinfusion
2.9667e-105	0.646671	1	0.999	1.18668e-103	Gamma Delta T	CD3-Protein	Patient 1_Day 7
2.40533e-84	1.75927	1	0.999	9.38077e-83	CD4 T	CD3-Protein	Patient 2_Preinfusion
7.07487e-81	0.608727	1	1	2.82995e-79	CD4 T	CD3-Protein	Patient 4_Day 21
8.72059e-53	0.255685	1	1	3.48824e-51	CD4 T	CD3-Protein	Patient 3_Day 24 CAR T
8.76936e-47	0.989393	1	0.997	3.50774e-45	CD4 T	CD3-Protein	Patient 4_Day 8
1.74111e-39	0.90058	1	1	6.96445e-38	Gamma Delta T	CD3-Protein	Patient 4_Day 21
1.1363e-24	0.316046	1	1	4.54521e-23	Gamma Delta T	CD3-Protein	Patient 3_Day 24
2.50192e-23	0.366369	1	0.998	1.00077e-21	Gamma Delta T	CD3-Protein	Patient 3_Preinfusion
2.87294e-21	0.52334	1	0.998	1.14917e-19	Gamma Delta T	CD3-Protein	Patient 4_Preinfusion
1.91027e-19	0.315667	1	1	7.64107e-18	CD4 T	CD3-Protein	Patient 4_Product
3.30388e-16	0.43455	1	1	1.32155e-14	CD4 T	CD3-Protein	Patient 1_Product
7.85234e-14	0.424225	1	1	3.06241e-12	CD4 T	CD3-Protein	Patient 2_Day 31
9.40138e-13	0.435861	1	1	3.76055e-11	CD4 T	CD3-Protein	Patient 3_Product
7.80091e-10	0.770555	1	0.997	3.12036e-08	Gamma Delta T	CD3-Protein	Patient 4_Day 8
1.13145e-05	1.05542	1	0.988	0.00045258	Gamma Delta T	CD3-Protein	Patient 1_Preinfusion
0	0.201361	0.895	0.412	0	Monocytes	CD40-Protein	Patient 1_Day 7
0	0.241038	0.982	0.474	0	Monocytes	CD40-Protein	Patient 2_Day 31
7.07902e-181	0.210361	0.982	0.56	2.76082e-179	Monocytes	CD40-Protein	Patient 2_Preinfusion
1.09457e-05	0.215185	0.817	0.806	0.000437828	Megakaryocytes	CD40-Protein	Patient 4_Preinfusion
1.07295e-199	0.534737	1	0.999	4.2918e-198	NK	CD45RA-Protein	Patient 3_Day 24
8.12282e-169	0.354102	0.997	0.992	3.1679e-167	CD8 T	CD45RA-Protein	Patient 2_Day 31
4.11328e-159	1.3132	1	1	1.64531e-157	NK	CD45RA-Protein	Patient 4_Day 21
4.2219e-130	0.404301	1	1	1.68876e-128	CD8 T	CD45RA-Protein	Patient 4_Day 21
3.79478e-118	0.92834	1	0.994	1.51791e-116	Gamma Delta T	CD45RA-Protein	Patient 1_Day 7
9.02837e-115	0.694957	1	0.999	3.61135e-113	Gamma Delta T	CD45RA-Protein	Patient 3_Day 24
4.09366e-112	0.67196	0.985	0.99	1.63746e-110	CD8 T	CD45RA-Protein	Patient 4_Day 8
2.80461e-90	0.288446	0.995	0.995	1.12185e-88	CD8 T	CD45RA-Protein	Patient 1_Day 7
2.98333e-85	1.18818	1	0.988	1.19333e-83	NK	CD45RA-Protein	Patient 4_Day 8
7.49294e-83	0.941261	0.978	0.968	2.92225e-81	CD8 T	CD45RA-Protein	Patient 2_Preinfusion
6.64406e-60	0.500252	0.997	0.997	2.52474e-58	CD8 T	CD45RA-Protein	Patient 1_Day 13
6.74916e-59	1.16651	1	1	2.69966e-57	Gamma Delta T	CD45RA-Protein	Patient 4_Day 21
1.2601e-54	0.422119	1	0.984	5.0404e-53	NK	CD45RA-Protein	Patient 3_Preinfusion
2.09637e-48	1.56832	1	0.995	8.17586e-47	NK	CD45RA-Protein	Patient 2_Day 31
5.89133e-27	0.753729	1	0.997	2.23871e-25	Gamma Delta T	CD45RA-Protein	Patient 1_Day 13
6.13574e-25	2.44077	1	0.969	2.39294e-23	NK	CD45RA-Protein	Patient 2_Preinfusion
1.07571e-23	0.465029	1	0.99	4.30284e-22	NK	CD45RA-Protein	Patient 4_Preinfusion
6.71151e-21	0.76827	1	0.995	2.6846e-19	NK	CD45RA-Protein	Patient 1_Day 7
4.20657e-19	0.298238	0.987	0.984	1.68263e-17	Gamma Delta T	CD45RA-Protein	Patient 3_Preinfusion
3.03784e-18	1.02124	1	0.988	1.21514e-16	Gamma Delta T	CD45RA-Protein	Patient 4_Day 8
5.04071e-13	0.436012	0.942	0.99	2.01628e-11	CD4 T	CD45RA-Protein	Patient 1_Preinfusion
7.82704e-11	0.435975	1	0.997	2.97427e-09	NK	CD45RA-Protein	Patient 1_Day 13
5.56284e-10	0.22097	1	0.99	2.22514e-08	Gamma Delta T	CD45RA-Protein	Patient 4_Preinfusion
9.43358e-08	1.10135	1	1	3.77343e-06	B cells	CD45RA-Protein	Patient 4_Day 21
1.7645e-06	0.956674	1	0.995	6.88157e-05	Gamma Delta T	CD45RA-Protein	Patient 2_Day 31
7.69915e-06	1.41161	1	0.983	0.000307966	Gamma Delta T	CD45RA-Protein	Patient 1_Preinfusion
0.000123317	1.52874	1	0.995	0.00480935	B cells	CD45RA-Protein	Patient 2_Day 31
0.000231844	1.52215	1	0.997	0.00927375	Gamma Delta T	CD45RA-Protein	Patient 4_Day 8 CAR T
1.05652e-93	0.342141	1	1	4.22609e-92	CD4 T	CD45RO-Protein	Patient 4_Day 21
1.27287e-90	0.230901	1	1	5.09148e-89	CD8 T	CD45RO-Protein	Patient 4_Day 21
2.84589e-84	0.784566	1	0.999	1.1099e-82	CD4 T	CD45RO-Protein	Patient 2_Preinfusion
4.79111e-64	0.746973	1	1	1.86853e-62	CD4 T	CD45RO-Protein	Patient 2_Day 31
1.37116e-55	0.312009	0.998	0.999	5.48463e-54	CD8 T	CD45RO-Protein	Patient 1_Preinfusion
1.68858e-51	0.331328	0.996	0.998	6.75431e-50	CD4 T	CD45RO-Protein	Patient 1_Day 7
4.33729e-41	0.207238	0.993	1	1.73492e-39	CD4 T	CD45RO-Protein	Patient 1_Preinfusion
2.37045e-37	0.397977	1	1	9.00771e-36	CD4 T	CD45RO-Protein	Patient 1_Day 13
0	1.76842	0.997	0.995	0	CD4 T	CD4-Protein	Patient 1_Preinfusion
0	0.769912	0.991	0.988	0	CD4 T	CD4-Protein	Patient 3_Preinfusion
0	0.827731	0.999	0.996	0	CD4 T	CD4-Protein	Patient 4_Preinfusion
8.25005e-246	1.4374	0.972	0.949	3.30002e-244	CD4 T	CD4-Protein	Patient 3_Day 24
2.75653e-224	2.07509	1	1	1.10261e-222	CD4 T	CD4-Protein	Patient 4_Day 21
1.22187e-119	2.35919	0.973	0.834	4.88748e-118	CD4 T	CD4-Protein	Patient 1_Day 7
8.59316e-92	2.17259	1	1	3.35133e-90	CD4 T	CD4-Protein	Patient 2_Preinfusion
8.87139e-79	2.33199	1	1	3.37113e-77	CD4 T	CD4-Protein	Patient 1_Day 13
6.79848e-77	2.5768	0.994	1	2.65141e-75	CD4 T	CD4-Protein	Patient 2_Day 31
7.22461e-47	0.2982	1	0.95	2.88984e-45	DC	CD4-Protein	Patient 3_Day 24
4.68377e-44	1.74868	0.991	0.975	1.87351e-42	CD4 T	CD4-Protein	Patient 4_Day 8
2.03701e-38	0.355146	0.993	0.998	8.14805e-37	CD8 T	CD4-Protein	Patient 4_Preinfusion
1.1389e-29	0.577176	1	0.838	4.55561e-28	DC	CD4-Protein	Patient 1_Day 7
6.28442e-26	1.65848	0.953	0.899	2.51377e-24	CD4 T	CD4-Protein	Patient 4_Product
4.88601e-24	0.306832	1	0.975	1.9544e-22	DC	CD4-Protein	Patient 4_Day 8
7.23775e-24	2.08189	0.944	0.83	2.8951e-22	CD4 T	CD4-Protein	Patient 1_Product
9.64187e-19	0.430777	1	1	2.02479e-17	CD4 T	CD4-Protein	Patient 2_Product
1.69923e-15	2.2159	0.868	0.71	6.7969e-14	CD4 T	CD4-Protein	Patient 3_Product
4.18217e-09	0.25062	1	1	1.58922e-07	DC	CD4-Protein	Patient 1_Day 13
2.21721e-07	1.08311	1	1	8.86886e-06	B cells	CD4-Protein	Patient 4_Day 21
2.66888e-07	1.0841	0.962	0.899	1.06755e-05	Monocytes	CD4-Protein	Patient 4_Product
0.000203941	1.18033	1	1	0.0079537	B cells	CD4-Protein	Patient 2_Day 31
0	0.881419	1	0.999	0	Monocytes	CD56-Protein	Patient 1_Preinfusion
0	0.323372	1	0.999	0	Monocytes	CD56-Protein	Patient 3_Preinfusion
0	0.296129	1	0.999	0	Monocytes	CD56-Protein	Patient 4_Preinfusion
4.96891e-274	0.852074	0.999	0.995	1.98756e-272	Monocytes	CD56-Protein	Patient 1_Day 7
7.91967e-241	0.375695	1	1	3.16787e-239	Monocytes	CD56-Protein	Patient 4_Day 21
6.43974e-219	1.04787	1	0.99	2.5115e-217	Monocytes	CD56-Protein	Patient 2_Preinfusion
3.31667e-188	1.3209	1	0.985	1.2935e-186	Monocytes	CD56-Protein	Patient 2_Day 31
2.0265e-161	0.524198	0.998	0.991	8.10601e-160	Monocytes	CD56-Protein	Patient 4_Day 8
2.7457e-148	0.509489	0.999	0.997	1.09828e-146	NK	CD56-Protein	Patient 3_Day 24
8.40572e-111	1.22447	1	1	3.36229e-109	NK	CD56-Protein	Patient 4_Day 21
2.08044e-65	0.622653	0.997	0.961	7.90567e-64	Monocytes	CD56-Protein	Patient 1_Day 13
3.13697e-20	0.719702	1	0.965	1.19205e-18	NK	CD56-Protein	Patient 1_Day 13
2.75871e-19	0.569358	1	0.99	1.0759e-17	NK	CD56-Protein	Patient 2_Day 31
3.12966e-14	0.869987	0.706	0.426	1.25186e-12	Gamma Delta T	CD56-Protein	Patient 4_Product
2.84309e-12	0.297137	1	0.996	1.13723e-10	NK	CD56-Protein	Patient 1_Day 7
1.64389e-07	0.498154	0.931	0.69	6.57557e-06	Gamma Delta T	CD56-Protein	Patient 1_Product
4.11032e-05	0.446361	1	0.996	0.00164413	Megakaryocytes	CD56-Protein	Patient 1_Day 7
1.82341e-118	0.342046	0.993	0.995	7.29362e-117	CD4 T	CD80-Protein	Patient 1_Preinfusion
1.8252e-57	0.484549	0.994	0.99	7.11827e-56	CD4 T	CD80-Protein	Patient 2_Preinfusion
1.34669e-47	0.224801	0.996	1	5.38677e-46	CD4 T	CD80-Protein	Patient 4_Day 21
2.95541e-27	0.35367	1	0.996	1.15261e-25	CD4 T	CD80-Protein	Patient 2_Day 31
5.09158e-20	0.209223	0.996	0.995	2.03663e-18	CD4 T	CD80-Protein	Patient 1_Day 7
2.15221e-17	0.244978	1	0.999	8.17838e-16	CD4 T	CD80-Protein	Patient 1_Day 13
0.000127679	0.280819	0.975	0.5	0.00485179	CD8 T	CD80-Protein	Patient 2_Day 24 CART
0	0.769938	1	0.935	0	Monocytes	CD86-Protein	Patient 1_Preinfusion
0	0.719728	1	0.97	0	Monocytes	CD86-Protein	Patient 1_Day 7
0	0.974904	1	0.937	0	Monocytes	CD86-Protein	Patient 2_Day 31
0	0.208334	0.998	0.966	0	Monocytes	CD86-Protein	Patient 3_Preinfusion
0	0.444396	0.999	0.971	0	Monocytes	CD86-Protein	Patient 3_Day 24
0	0.232996	0.999	0.984	0	Monocytes	CD86-Protein	Patient 4_Preinfusion
0	0.382285	0.999	0.977	0	Monocytes	CD86-Protein	Patient 4_Day 8
0	0.902095	1	1	0	Monocytes	CD86-Protein	Patient 4_Day 21
4.46707e-273	0.787571	1	0.933	1.74216e-271	Monocytes	CD86-Protein	Patient 2_Preinfusion
1.34197e-193	0.771373	1	0.888	5.09949e-192	Monocytes	CD86-Protein	Patient 1_Day 13
1.00855e-108	0.320536	0.902	0.792	4.03421e-107	CD8 T	CD86-Protein	Patient 3_Day 24 CAR T
5.85731e-10	0.360271	0.844	0.686	2.34292e-08	Gamma Delta T	CD86-Protein	Patient 4_Product
1.28604e-08	0.386476	0.559	0.142	4.88697e-07	Monocytes	CD86-Protein	Patient 2_Day 24
0.000153916	0.534571	0.857	0.774	0.00615666	DC	CD86-Protein	Patient 1_Product
0.000224138	0.373776	0.897	0.772	0.00896552	Gamma Delta T	CD86-Protein	Patient 1_Product
0	1.54026	1	0.999	0	CD8 T	CD8-Protein	Patient 1_Day 7
0	2.37107	1	1	0	CD8 T	CD8-Protein	Patient 2_Day 31
0	0.949717	1	1	0	CD8 T	CD8-Protein	Patient 3_Day 24
0	2.34818	1	1	0	CD8 T	CD8-Protein	Patient 4_Day 21
1.73788e-266	1.68853	0.999	0.996	6.95152e-265	CD8 T	CD8-Protein	Patient 4_Day 8
1.35444e-240	1.77797	1	1	5.14686e-239	CD8 T	CD8-Protein	Patient 1_Day 13
7.96856e-216	0.517256	0.998	0.997	3.18742e-214	CD8 T	CD8-Protein	Patient 3_Preinfusion
3.42578e-181	2.703	1	0.998	1.33606e-179	CD8 T	CD8-Protein	Patient 2_Preinfusion
8.03279e-89	0.406294	0.998	0.998	3.21312e-87	CD8 T	CD8-Protein	Patient 4_Preinfusion
1.9505e-84	2.11852	0.998	0.995	7.80201e-83	CD8 T	CD8-Protein	Patient 1_Preinfusion
2.26453e-39	0.467118	0.999	0.998	9.05812e-38	CD8 T	CD8-Protein	Patient 4_Product
2.16139e-19	0.386325	1	1	8.64557e-18	CD8 T	CD8-Protein	Patient 1_Product
5.42503e-18	0.392574	1	0.995	2.17001e-16	CD8 T	CD8-Protein	Patient 3_Product
2.04269e-15	1.53607	0.882	0.6	7.76223e-14	CD8 T	CD8-Protein	Patient 2_Day 24
1.62248e-10	1.88826	1	0.998	6.48993e-09	Gamma Delta T	CD8-Protein	Patient 4_Preinfusion
1.99258e-09	0.634173	1	1	4.18442e-08	Gamma Delta T	CD8-Protein	Patient 2_Product
4.29505e-09	0.541983	1	1	9.01961e-08	CD8 T	CD8-Protein	Patient 2_Product
6.55955e-09	0.769564	0.997	0.984	2.62382e-07	CD8 T	CD8-Protein	Patient 4_Day 8 CAR T
6.82418e-06	1.89152	1	0.995	0.000272967	Gamma Delta T	CD8-Protein	Patient 1_Preinfusion
2.69025e-05	0.336173	1	0.996	0.0010761	Gamma Delta T	CD8-Protein	Patient 4_Day 8
0	0.318318	1	1	0	CD8 T	CD95-Protein	Patient 4_Day 21
7.64871e-152	0.519022	1	1	3.05948e-150	CD4 T	CD95-Protein	Patient 4_Day 21
8.57364e-120	0.4733	1	1	3.42946e-118	CD8 T	CD95-Protein	Patient 1_Preinfusion
1.45507e-71	0.309307	1	1	5.8203e-70	CD4 T	CD95-Protein	Patient 1_Preinfusion
1.59012e-60	0.325245	1	1	6.3605e-59	CD4 T	CD95-Protein	Patient 1_Day 7
3.25438e-48	0.33379	1	1	1.23667e-46	CD4 T	CD95-Protein	Patient 1_Day 13
3.94056e-33	0.358431	1	1	1.57622e-31	CD4 T	CD95-Protein	Patient 4_Day 8
5.75494e-18	0.998637	1	0.999	2.30197e-16	DC	HLA_DR-Protein	Patient 4_Product
1.62684e-12	1.34064	1	1	6.50735e-11	DC	HLA_DR-Protein	Patient 1_Product
0	0.451997	1	1	0	Monocytes	HLA-DR-Protein	Patient 3_Day 24
0	0.619521	1	1	0	Monocytes	HLA-DR-Protein	Patient 4_Day 21
6.49658e-246	0.999776	1	1	2.53366e-244	Monocytes	HLA-DR-Protein	Patient 2_Day 31
5.82883e-222	0.562239	1	0.999	2.33153e-220	Monocytes	HLA-DR-Protein	Patient 1_Preinfusion
3.24154e-217	0.347469	1	1	1.29662e-215	DC	HLA-DR-Protein	Patient 3_Preinfusion
8.31191e-209	0.700388	1	1	3.32476e-207	Monocytes	HLA-DR-Protein	Patient 1_Day 7
1.16697e-168	0.661284	1	1	4.6679e-167	DC	HLA-DR-Protein	Patient 4_Preinfusion
1.3636e-79	0.567405	1	1	5.18169e-78	Monocytes	HLA-DR-Protein	Patient 1_Day 13
6.65546e-65	0.426886	1	1	2.59563e-63	Monocytes	HLA-DR-Protein	Patient 2_Preinfusion
8.76783e-55	0.6268	1	1	3.50713e-53	DC	HLA-DR-Protein	Patient 3_Day 24
5.88078e-46	0.885996	1	1	2.35231e-44	DC	HLA-DR-Protein	Patient 4_Day 21
2.00025e-45	0.68131	1	1	8.001e-44	DC	HLA-DR-Protein	Patient 1_Preinfusion
5.02721e-37	0.810515	1	1	2.01088e-35	DC	HLA-DR-Protein	Patient 4_Day 8
2.22408e-35	1.18919	1	1	8.89633e-34	DC	HLA-DR-Protein	Patient 1_Day 7
5.54651e-24	0.731589	1	1	2.16314e-22	DC	HLA-DR-Protein	Patient 2_Preinfusion
1.68514e-22	1.22184	1	1	6.57204e-21	DC	HLA-DR-Protein	Patient 2_Day 31
1.18197e-13	1.2663	1	1	4.7279e-12	DC	HLA-DR-Protein	Patient 3_Product
2.66116e-10	1.8631	1	1	5.58844e-09	Monocytes	HLA-DR-Protein	Patient 2_Product
4.98569e-10	1.12053	1	1	1.89456e-08	DC	HLA-DR-Protein	Patient 1_Day 13
1.31125e-09	1.21361	1	0.817	4.98275e-08	Monocytes	HLA-DR-Protein	Patient 2_Day 24
1.73372e-09	0.21564	1	1	6.93488e-08	DC	HLA-DR-Protein	Patient 3_Day 24 CAR T
4.83997e-09	0.426492	1	1	1.93599e-07	Monocytes	HLA-DR-Protein	Patient 4_Day 8 CAR T
5.90619e-07	0.64684	1	1	2.36247e-05	B cells	HLA-DR-Protein	Patient 4_Day 21
3.01279e-06	1.89001	1	1	6.32686e-05	DC	HLA-DR-Protein	Patient 2_Product
0	1.72993	1	0.999	0	Monocytes	IgG-Protein	Patient 1_Preinfusion
0	2.66374	1	1	0	Monocytes	IgG-Protein	Patient 1_Day 7
0	2.66988	1	0.999	0	Monocytes	IgG-Protein	Patient 2_Day 31
0	0.845789	1	1	0	Monocytes	IgG-Protein	Patient 3_Preinfusion
0	1.47342	1	1	0	Monocytes	IgG-Protein	Patient 3_Day 24
0	1.16103	1	0.999	0	Monocytes	IgG-Protein	Patient 4_Preinfusion
0	1.76037	1	1	0	Monocytes	IgG-Protein	Patient 4_Day 8
0	1.64631	1	1	0	Monocytes	IgG-Protein	Patient 4_Day 21
5.03745e-262	1.73938	1	1	1.9646e-260	Monocytes	IgG-Protein	Patient 2_Preinfusion
6.64507e-200	2.83976	1	0.999	2.52513e-198	Monocytes	IgG-Protein	Patient 1_Day 13
1.30407e-35	0.602827	1	1	5.21629e-34	DC	IgG-Protein	Patient 3_Day 24
2.00792e-21	1.05288	1	1	8.03168e-20	DC	IgG-Protein	Patient 1_Day 7
6.61542e-18	1.9223	0.971	0.544	2.51386e-16	Monocytes	IgG-Protein	Patient 2_Day 24
1.35452e-13	0.424857	1	1	5.41809e-12	DC	IgG-Protein	Patient 4_Day 21
5.96662e-10	1.45213	1	0.999	2.26732e-08	DC	IgG-Protein	Patient 1_Day 13
2.9001e-07	0.410935	1	0.999	1.13104e-05	DC	IgG-Protein	Patient 2_Day 31
1.60261e-05	0.212082	1	1	0.000641046	DC	IgG-Protein	Patient 1_Preinfusion
0	0.594753	1	0.996	0	Monocytes	Tim3-Protein	Patient 1_Preinfusion
0	0.551451	1	0.998	0	Monocytes	Tim3-Protein	Patient 2_Day 31
0	0.529443	1	1	0	Monocytes	Tim3-Protein	Patient 4_Day 21
9.94478e-181	0.272765	1	1	3.97791e-179	DC	Tim3-Protein	Patient 3_Preinfusion
1.13638e-169	0.301206	1	0.998	4.54553e-168	Monocytes	Tim3-Protein	Patient 4_Day 8
4.45829e-167	0.258558	1	1	1.78331e-165	Monocytes	Tim3-Protein	Patient 1_Day 7
4.18153e-149	0.410925	1	1	1.67261e-147	DC	Tim3-Protein	Patient 4_Preinfusion
4.97348e-142	0.33724	1	1	1.93966e-140	Monocytes	Tim3-Protein	Patient 2_Preinfusion
4.18961e-64	0.296789	1	0.999	1.59205e-62	Monocytes	Tim3-Protein	Patient 1_Day 13
4.40233e-63	0.480771	1	0.999	1.76093e-61	DC	Tim3-Protein	Patient 3_Day 24
1.40128e-53	1.10335	1	1	5.6051e-52	DC	Tim3-Protein	Patient 4_Day 21
5.79321e-42	0.506716	1	0.999	2.31728e-40	DC	Tim3-Protein	Patient 1_Preinfusion
5.06427e-40	1.00268	1	1	2.02571e-38	DC	Tim3-Protein	Patient 1_Day 7
1.41056e-32	0.505967	1	0.999	5.64223e-31	DC	Tim3-Protein	Patient 4_Day 8
5.66069e-25	1.14991	1	0.999	2.20767e-23	DC	Tim3-Protein	Patient 2_Day 31
1.58426e-22	0.591011	1	1	6.17863e-21	DC	Tim3-Protein	Patient 2_Preinfusion
1.03009e-09	0.836211	1	0.999	3.91434e-08	DC	Tim3-Protein	Patient 1_Day 13
3.30356e-07	0.214465	1	0.999	1.25535e-05	NK	Tim3-Protein	Patient 1_Day 13
3.1241e-05	0.281445	1	1	0.00124964	Gamma Delta T	Tim3-Protein	Patient 4_Product
3.64479e-05	0.373141	0.853	0.586	0.00138502	Monocytes	Tim3-Protein	Patient 2_Day 24

## Sheet: DGE CD8 T cells
gene	Freq	PBMCcount	CARTcount	cluster	avgFC
ZZEF1	8	5	3	C5	4.22032471460515, 1.48113805464558, 2.86385679591321, 1.94197512095867, 1.54540264100331, 1.11160927232413, 1.30428241525796, 2.02505648801769
ZYX	7	4	3	C5	1.30587993349087, 1.22396730894112, 1.12337478254928, 1.39341052974891, 1.89085128332244, 1.44820739168565, 1.33223534650608
ZWINT	18	11	7	C4	1.91375069309143, 1.2617678853364, 1.35844384432685, 1.92714581647817, 1.19711016194104, 1.28993447089192, 1.28219146243252, 1.19277159791996, 1.28216713968355, 1.3286912760604, 1.41782861602049, 1.48975381763596, 1.73117202071089, 1.15886640935562, 1.45000506618111, 1.27057856028655, 1.43242770803679, 2.49458707877807
ZWILCH	7	2	5	C4	1.14800553098032, 1.29549680875681, 1.14488503756283, 1.17902978124433, 1.14043696611593, 1.12759237005071, 1.20786143536691
ZSWIM8	4	2	2	C5	3.06757494541305, 1.42321553518648, 1.24722170694272, 1.33312961191442
ZSWIM7	3	2	1	C5	1.65474574271772, 1.1651117188415, 1.19385696406222
ZSCAN16-AS1	4	2	2	C5	1.23783666802785, 1.21656572143014, 1.22332573873252, 1.1327441911065
ZRSR2	6	3	3	C5	2.5592015342283, 1.17884697993045, 1.30134823222518, 1.11570015172513, 1.28681440754243, 1.19086032784178
ZRANB2	12	7	5	C5	3.09420041487757, 11.7756969281253, 2.06244929926831, 1.87153108296861, 1.67826981826075, 2.2301148114741, 1.78102273409655, 1.15202862768274, 1.78298434153323, 2.04268862884686, 3.31190735296114, 1.1220399666088
ZRANB1	10	6	4	C5	2.96893541311434, 2.66722957339956, 1.85347247528331, 1.19483141857233, 1.37090213903985, 1.23326570864926, 1.13878326807561, 1.72117334099384, 1.56878162018916, 1.58568674861968
ZPR1	3	2	1	C5	2.32722910072712, 1.68980197013087, 1.19586431250828
ZNRF2	7	6	1	C5	4.78913003809704, 2.86955292009742, 1.22520500935229, 1.11282729913867, 2.81676310590493, 1.35930514290895, 1.30175547213412
ZNHIT6	8	5	3	C5	4.70375551812643, 1.14046346476911, 1.72476715851777, 1.38161947201268, 1.70104419806686, 1.84520742463972, 1.1799514169464, 2.14896051296796
ZNHIT1	3	2	1	C1	1.10962976591779, 1.15855587355969, 1.17278260796071
ZNHIT1	3	2	1	C5	2.14984624709351, 1.11129314357055, 1.14851086433356
ZNFX1	7	4	3	C5	2.88588427223814, 1.16541489785331, 1.1969662924055, 1.30075347877578, 1.41775771655676, 1.2377614757334, 1.41795691419634
ZNF92	8	5	3	C5	2.04415935378687, 1.30183988445451, 1.21593272964236, 1.74316709866887, 1.254401738237, 1.22203373426197, 1.27171861771184, 1.26774940371876
ZNF91	7	4	3	C5	1.4142124981973, 1.13242269539056, 1.20295820715215, 1.30220098488821, 1.24574606422153, 1.26795367111757, 1.3472549108124
ZNF831	4	3	1	C5	2.69380457162208, 1.29778521449509, 1.19642488019397, 1.29860421168575
ZNF830	8	5	3	C5	1.79502629820799, 1.32746651522887, 1.20909909922371, 1.17396116728895, 1.14340731088486, 1.65479960119457, 1.21276787332492, 1.34420150046261
ZNF83	6	4	2	C5	1.50837068295958, 2.35006796232869, 1.31283815678049, 1.50499324114125, 1.41159738389133, 1.63862123260641
ZNF821	4	3	1	C5	1.15315476820243, 1.25986386398018, 1.2358956988525, 1.23948439206191
ZNF800	7	6	1	C5	7.24487004981577, 1.44327013242486, 1.55909406169457, 1.72700122161494, 5.8953888711318, 1.92599879784163, 2.54400987942877
ZNF791	11	7	4	C5	2.42370177336416, 1.35121332599962, 1.47670367908855, 1.43717588540519, 5.27092533523901, 1.60889571606541, 1.45312333811951, 1.12910278008024, 1.16171713805012, 1.3911196260538, 1.81535431032914
ZNF770	6	4	2	C5	2.82057864083775, 2.19192619620298, 1.55261265099788, 1.28138968937134, 1.39598557054126, 1.23777497405766
ZNF766	4	3	1	C5	3.31063482196075, 2.76152072353857, 1.30378746899483, 1.37668443870241
ZNF75A	3	1	2	C5	1.28865970691474, 1.22973385510228, 1.55601349771608
ZNF738	4	2	2	C5	2.55914964302034, 1.26643386369153, 1.13985845572318, 1.41308255064011
ZNF721	5	4	1	C5	4.67783620972549, 2.35504566937537, 1.11988116982514, 1.26087198643629, 1.4152766843693
ZNF720	5	2	3	C5	2.1073359781368, 1.22765453139663, 1.49123806826406, 1.22450260399758, 1.35712145904881
ZNF714	3	1	2	C5	1.47352894141652, 1.12057958954565, 1.16316480766799
ZNF708	4	3	1	C5	2.62391410100956, 1.26155413784529, 1.39996593792218, 1.63302795291448
ZNF706	3	1	2	C4	1.15753162844686, 1.12336892383729, 1.26484446072349
ZNF706	4	3	1	C5	2.97110124026703, 1.22695985989913, 1.30385087151929, 1.23343896189697
ZNF683	7	4	3	C1	1.48716974488846, 1.26159725035338, 1.1280596366356, 1.12460872533877, 1.3362673437882, 1.26744715441542, 1.51655097242831
ZNF683	4	4	0	C5	2.03825181411959, 1.47674222343535, 1.31801419464319, 1.46692870126996
ZNF675	3	1	2	C5	1.16955647682953, 1.21064272897507, 1.2036807590106
ZNF655	11	6	5	C5	7.22261251910807, 1.84387234308567, 1.54777183967303, 4.37837414049952, 1.57078746826305, 1.28244142133412, 1.19684168608175, 2.77154571064186, 1.40852685935566, 2.11704015133044, 1.15593497258414
ZNF652	8	5	3	C5	2.27119690627149, 1.37769745373608, 1.27395061087392, 1.32756268958299, 1.36107492059403, 1.36930043498422, 1.18402153475907, 1.42883677268602
ZNF644	8	6	2	C5	2.28232110247164, 6.93382819735415, 1.52344679819083, 1.89798259769518, 2.02347153119942, 1.34920963179648, 2.90056681402929, 2.87565277785782
ZNF639	3	1	2	C5	2.43892895906137, 1.43251830208926, 1.29519325470935
ZNF638	10	7	3	C5	2.77717685219399, 2.96229512544056, 1.3281484144007, 1.26327708497844, 2.58183328220939, 1.23612678432757, 1.29638835944802, 1.13964742804989, 1.64863442879846, 1.91101305721538
ZNF622	3	2	1	C5	1.66484679036095, 1.12876408840201, 1.12990545070949
ZNF609	3	1	2	C5	1.22193986118037, 1.37109253209204, 1.10910807907377
ZNF598	3	1	2	C5	2.88240029980604, 1.60650798534466, 1.10812075403148
ZNF587	3	1	2	C5	1.29941921875381, 1.18745436294168, 1.55701525330933
ZNF580	7	4	3	C5	1.27238054279715, 1.22120094955522, 1.27954519208312, 1.13177072992763, 1.22499902694395, 1.24725934262561, 1.22173331840768
ZNF518A	7	4	3	C5	2.55862044104946, 1.78204858938201, 1.48375287844245, 1.38354496872155, 1.48493717962361, 1.36981024759366, 1.8189797394772
ZNF511	4	4	0	C4	1.23390265392604, 1.13986184552417, 1.14343989702694, 1.11371349166429
ZNF507	4	3	1	C5	1.32829648580603, 1.28244026751245, 1.44089922397166, 1.64380521469844
ZNF493	5	4	1	C5	3.53212134143061, 1.49660065970876, 1.23095526001497, 1.4282206211129, 1.53834459296328
ZNF451	13	9	4	C5	4.49050145175116, 10.5711668001787, 1.86578375000194, 1.44157168352641, 1.58286783070085, 1.80401902316853, 4.59855466295108, 1.52545741784509, 1.62801529476038, 1.50153809062685, 1.14905754753719, 3.00936548937853, 1.79300707501443
ZNF44	3	2	1	C5	1.30961448082101, 1.48346139193577, 1.36508415130596
ZNF431	9	6	3	C5	3.95417643141074, 1.3210007430602, 1.14877297815211, 1.20275504580449, 1.12770423679303, 1.28078335495561, 1.27289302635968, 1.20159425924395, 1.69852438704513
ZNF430	7	5	2	C5	4.88939355954296, 1.75644371016823, 1.35095199201056, 1.29913369041585, 1.18135529948643, 1.21243404707558, 2.06170011486319
ZNF428	4	1	3	C5	1.11029684830467, 1.35386982679335, 1.26672088858147, 1.24370250551249
ZNF407	6	5	1	C5	2.60823226805561, 1.52404112692046, 1.56400310200012, 1.18171239966301, 1.54096160998942, 2.33972286331465
ZNF394	9	7	2	C5	5.33387985521343, 6.38248481487934, 1.84009812202689, 1.59356496867682, 2.28696684074286, 1.53667362281343, 1.37206973997419, 1.64853620909994, 2.11124156669602
ZNF384	3	2	1	C5	1.26413531321679, 1.40284304967489, 1.48437329433333
ZNF37A	9	6	3	C5	4.71823221448539, 3.19996454267103, 1.40463590874246, 1.285853384511, 1.37061187408913, 1.465471855806, 1.7807624378117, 1.46657710637844, 1.51434589069639
ZNF367	3	2	1	C4	1.13665620320795, 1.42922200515206, 1.14675987049279
ZNF350	7	5	2	C5	2.25057464868299, 1.14255624612225, 1.25585603917482, 1.14712108796655, 1.18006501048309, 1.71924626933705, 1.31083603273153
ZNF33B	3	1	2	C5	1.22157216251931, 1.1454516071945, 1.22649358555646
ZNF33A	8	6	2	C5	2.85518763530606, 1.6706381885019, 1.21509051729985, 1.69943107369236, 1.16350539208845, 1.21448028043723, 1.17429523290109, 1.17086490778194
ZNF335	8	6	2	C5	2.90978029109503, 1.65994111517327, 1.1795480672784, 2.89244237759968, 1.38383722516616, 1.26444669464927, 1.79388195844094, 1.47746795715743
ZNF331	5	5	0	C2	2.38361616281597, 1.17612452767553, 1.12315529285233, 1.55016696700016, 1.1195898646692
ZNF331	7	4	3	C5	5.74503972757688, 1.11227337117362, 1.22054517952664, 2.16156004685294, 2.37948599567756, 1.63981000663721, 1.23987001374998
ZNF330	3	2	1	C5	1.86806167674404, 1.29020308069347, 1.24064010673972
ZNF326	10	7	3	C5	5.04348437744621, 1.23082342452836, 1.6953942036913, 1.5493726584305, 5.6531669577908, 1.71839932815204, 1.47403210115624, 2.47803242446607, 1.17872666069028, 2.45514422242678
ZNF317	4	2	2	C5	1.31134482603559, 1.34465620144032, 1.16661227589232, 1.20121022661895
ZNF302	6	3	3	C5	2.40762443928913, 1.2583075143491, 1.45051358910309, 1.58063007747799, 1.30398030776256, 1.13445537011683
ZNF292	12	7	5	C5	4.88822653799057, 13.9334952967782, 3.79099732975233, 2.60747734871496, 5.90075774869493, 2.96131459588946, 1.83745217284014, 1.9820675537857, 1.94476132327276, 4.32726851889158, 1.15847633736589, 1.94303610339303
ZNF281	6	4	2	C5	3.13582670203985, 1.19450529081532, 1.24139793264751, 1.25543404498224, 1.45122448697128, 1.50464341623847
ZNF280D	6	5	1	C5	4.27460126265973, 1.37590923823511, 1.13588108035173, 1.63993440826524, 1.52449272991863, 1.40825961510275
ZNF277	5	4	1	C5	1.24391973185553, 1.29482767926998, 1.6683928440778, 1.13521391818616, 1.16092797130836
ZNF276	9	5	4	C5	3.38768038939273, 1.77522084575917, 1.31087959302017, 1.46709867966992, 1.55209994569438, 2.18386260258501, 1.57821798933651, 1.77603572010139, 1.12277142858447
ZNF267	5	4	1	C5	2.94952997924172, 1.20762322849673, 1.13737718666988, 1.29734601151013, 1.62660105774612
ZNF264	3	1	2	C5	1.10711124239408, 1.3492180163357, 1.25473473261639
ZNF26	6	3	3	C5	1.35091858984725, 1.22688078389213, 1.31732078904569, 1.47259523019636, 1.21147564069039, 1.5928149332392
ZNF24	7	5	2	C5	1.95715584741693, 1.11010183917183, 1.23455270177221, 1.17742934444208, 1.1318087068505, 1.30508971169789, 1.49461157213053
ZNF236	4	2	2	C5	1.11258522494558, 1.4510868547846, 1.48666235327913, 1.19944133219075
ZNF224	7	5	2	C5	3.23213237684566, 1.65451757594691, 1.17072079442833, 1.76645224056193, 1.55307814832723, 1.13173289292932, 1.33927354779454
ZNF217	5	4	1	C5	2.74810023042754, 1.41834177237158, 1.24713102432551, 1.18381552608346, 1.52175062180423
ZNF207	12	7	5	C5	3.14459194896153, 14.5515191814357, 2.77241201004245, 2.96078925537724, 2.70798321274449, 3.01551045860062, 2.54384839977035, 1.35199185589338, 3.71348545335097, 1.6792373739196, 5.05892581567089, 1.11667621159445
ZNF195	4	1	3	C5	3.31269272054251, 1.24674956839549, 1.40957715761675, 1.27345157142777
ZNF160	5	3	2	C5	1.25169432337481, 1.48673664663656, 1.11313060219285, 1.29429411137931, 1.3604663187953
ZNF148	7	5	2	C5	3.51277839796427, 1.32301158400754, 1.41770699763658, 1.54460288191681, 1.19918524506384, 1.35712130440363, 1.83691847693774
ZNF131	10	6	4	C5	4.69851661714068, 3.48116511675409, 1.26241492351281, 1.37205211646257, 1.43007133310307, 1.55686798490757, 1.10916257391564, 2.64555412140209, 1.53903011518609, 1.79188723336374
ZNF121	3	2	1	C5	1.11719804772508, 1.37060877176513, 1.23004075625645
ZNF12	5	3	2	C5	1.56011414724467, 1.43955049541272, 1.20574494681204, 1.4073612487152, 1.44573530203284
ZNF107	3	2	1	C5	1.4477083176702, 1.23630723894252, 1.40203045250851
ZNF106	6	4	2	C5	3.94603900894597, 1.27552265328703, 1.3850826566914, 1.70341648548913, 1.62295661860086, 1.3572572341219
ZNF101	8	6	2	C5	2.82749867192105, 2.22292305719831, 1.51866590112573, 1.25668080839, 1.2815569108798, 1.22567588398175, 1.20436445731215, 1.66276607203463
ZMYND8	8	5	3	C5	3.21450175882913, 1.14292379777354, 1.3833829155579, 2.77106437776623, 1.60317013625948, 2.58600648913298, 1.33339758135154, 2.1883916313621
ZMYND11	7	4	3	C5	1.65456754734854, 1.15646187187011, 1.16533301764686, 1.4723302205788, 1.62508710326916, 1.13606509092532, 1.16354856059305
ZMYM5	4	2	2	C5	2.29048706104182, 1.11058270575394, 1.19662635650438, 1.25916370714951
ZMYM4	6	5	1	C5	3.06473918900378, 2.79510228113734, 1.23824178910323, 1.24873632750802, 1.37260197761129, 1.64275842492207
ZMYM2	11	7	4	C5	5.7814514894983, 1.31197558069051, 2.13586796285923, 1.65735028847898, 2.95280013300932, 2.00319115780348, 1.43042784031283, 1.11280920075988, 2.27376812095627, 1.14815993550015, 2.67164069946558
ZMPSTE24	4	2	2	C5	1.48353787208773, 1.12588667832433, 1.10644310770768, 1.2158410326742
ZMAT3	4	2	2	C1	1.33281011082297, 1.41182206624176, 1.2290293005375, 1.18718466979704
ZMAT3	6	4	2	C5	1.93119256972292, 1.2422419575839, 3.95439537366937, 1.20921846160893, 1.16632760956986, 1.12077027220061
ZKSCAN1	7	5	2	C5	2.22398909069227, 1.53550081554821, 1.2666036892311, 1.36481945826879, 2.09961809531277, 1.21254760079777, 1.46142924355029
ZHX1	6	5	1	C5	1.87598725943075, 1.50877091854255, 1.19075176319346, 1.25980347129702, 1.49341162863052, 1.46810598148462
ZGRF1	5	4	1	C4	1.11149945411317, 1.27983599203341, 1.10540915646501, 1.1944270136573, 1.22288556720116
ZFYVE28	3	3	0	C5	1.17036290075468, 1.3892795572616, 1.19305639437156
ZFYVE27	3	3	0	C5	3.99941116676221, 1.15625122267955, 1.39715579369099
ZFYVE16	5	4	1	C5	1.47900573284577, 1.21675055736158, 1.49335321973727, 1.33130181212452, 1.50249475875606
ZFY	4	3	1	C5	1.16470844338466, 1.56319099984136, 1.16628324064235, 1.319530380538
ZFX	9	6	3	C5	4.16727375285271, 3.71537021604644, 1.28848431841137, 2.16012980877158, 1.21415483056618, 1.19495663911782, 1.33383672376222, 1.57778581109268, 1.89802572945944
ZFR	8	6	2	C5	4.52379245090978, 3.0175600985734, 1.58011198820637, 1.31184894181834, 1.51951377526078, 1.1848285908721, 1.57128508162057, 1.72194520765157
ZFPM1	3	3	0	C5	1.47351604194054, 1.3606162781068, 1.11348094715076
ZFP91	6	4	2	C5	2.22268335850281, 1.32939558534898, 1.2074611582629, 1.20784484506447, 2.354956476014, 1.64268151597821
ZFP90	5	2	3	C5	1.23842893850522, 1.15929584319528, 1.13980505699045, 1.13297853086543, 1.27686333227412
ZFP36L2	8	4	4	C2	1.65417133751398, 1.32307961128563, 1.72925885612019, 1.41768286283532, 1.16110788669766, 1.25382736521346, 1.17255542232289, 1.18702153925056
ZFP36L2	9	7	2	C5	7.13950403787406, 1.64417348389544, 1.86020798608527, 3.29906694495244, 1.56997914027112, 2.13261124434506, 1.20615378006224, 2.3972391882976, 2.10243421324553
ZFP36L2	5	4	1	C6	1.72832865153139, 2.61330648266874, 1.30731877847756, 1.85982055963555, 1.44234823678308
ZFP36L1	7	5	2	C5	2.37176138056045, 2.38030526076592, 1.26551471133203, 1.50695681783998, 1.21000912774578, 1.25348439632408, 1.64934684373495
ZFP36	4	1	3	C2	1.12059673921055, 1.22983949083029, 1.21658445488206, 1.18955994524923
ZFP36	6	4	2	C5	5.74385632056824, 1.43999219805927, 1.15036060000474, 1.18968563327654, 1.3182636759497, 1.22361945938793
ZFC3H1	10	6	4	C5	1.89907842637725, 8.96566641101055, 1.87234107157108, 1.70715107845364, 2.19635364670604, 1.16565405087351, 1.62394759104648, 1.32272342205794, 2.63359848277797, 2.13635775754397
ZFAS1	4	2	2	C2	1.11478480057643, 1.27004883273061, 1.22117728294939, 1.11988305600048
ZFAS1	3	0	3	C4	1.24417743902576, 1.12043183975147, 1.15280987305651
ZFAS1	5	4	1	C6	2.00323385660694, 1.86309383131648, 1.16384852914908, 1.83968405962942, 1.25466645134468
ZFAND6	9	7	2	C5	2.59736014366412, 5.52566047912101, 1.44353676618638, 1.58958170035936, 2.45469081660583, 1.52912356353976, 1.20704469284302, 1.31190227128346, 2.04435218461618
ZFAND5	7	4	3	C5	3.11955242592174, 1.24413772615831, 1.6102705318086, 1.2368891127101, 1.11789430510868, 1.12015016237692, 1.49740247343054
ZFAND3	6	4	2	C5	3.75223134126527, 2.35819159159677, 1.30076847128044, 1.23354778142452, 1.26173315327328, 1.19889916215348
ZFAND2B	4	3	1	C5	2.20527630985169, 1.16232024955594, 1.74955702084175, 1.19763633443601
ZFAND2A	3	2	1	C1	1.23285908382667, 1.10799722874281, 1.37839560094498
ZFAND2A	4	3	1	C5	2.19776186962293, 1.11078479729527, 1.70551921566038, 1.17484211810465
ZEB2	7	5	2	C1	1.51340271938054, 1.1309310598317, 1.2938018393866, 1.10690633849697, 1.45449861492088, 1.19015387979136, 1.97760875789364
ZEB2	9	7	2	C5	5.04087019441533, 13.262985634999, 1.69963062162194, 3.22257603789195, 1.822103896687, 3.15339088838413, 2.68891997234859, 1.31684999953381, 2.9362764474477
ZEB1	7	4	3	C5	1.16222345283937, 1.36943907914988, 1.1703416105081, 1.31288165272137, 1.1182902332369, 1.2287558067224, 1.72178752656206
ZDHHC7	3	2	1	C5	1.1194933879212, 1.10762348124304, 1.13325949195472
ZDHHC5	5	4	1	C5	2.71409718815659, 1.25352333523973, 1.1652651695195, 1.17772037121853, 1.52028908486142
ZDHHC3	3	3	0	C5	1.92676040134439, 1.36207159960374, 1.1313501767665
ZDHHC21	6	5	1	C5	3.94776062661554, 1.25065561195726, 1.20968504624888, 1.53865047411929, 1.33852080002982, 1.4913382385185
ZDHHC20	8	6	2	C5	2.83413468067509, 3.60605122334143, 1.56562767762555, 1.29154186539516, 1.25779573310798, 1.17837663141618, 1.85655765346206, 1.63530005039028
ZDHHC18	3	2	1	C5	2.56642773063419, 1.11568606308355, 1.16548201374482
ZDHHC17	6	5	1	C5	4.02303952653738, 1.12785720074486, 1.24410901090051, 1.36471255433373, 1.17014626029753, 1.56660431243659
ZDHHC12	3	1	2	C4	1.10555809972962, 1.14926605787965, 1.31816781680784
ZDHHC12	5	4	1	C5	1.25071199353189, 1.21666906333809, 1.98538275671809, 1.1138180218152, 1.38264174151383
ZCRB1	5	3	2	C4	1.33017033257818, 1.21555211770341, 1.12805267339865, 1.10692750238165, 1.10842017715385
ZCCHC9	5	3	2	C5	2.83317345022579, 1.15053762411937, 1.22995815432528, 1.13652901121551, 1.12235818961271
ZCCHC8	8	5	3	C5	4.36144144096243, 1.2848036596066, 1.16759859206191, 1.40538026118105, 1.46419524054595, 1.57878282200689, 1.36129329768917, 1.50166766487139
ZCCHC7	5	3	2	C5	2.45883855177329, 1.5045758265764, 1.16730815282696, 1.44954713556806, 1.24417272791133
ZCCHC2	7	5	2	C5	4.57524900965906, 4.23636953257209, 2.33636005390843, 1.13930350708249, 1.46869384849784, 1.14841387883819, 1.34186893352435
ZCCHC10	4	2	2	C5	1.18420716504198, 1.13887225109065, 1.16479685088187, 1.13785389087201
ZC3HAV1	11	7	4	C5	7.45109175481485, 1.47878161668739, 3.20171136092187, 1.50291853651508, 1.62037065092211, 1.4194956094028, 1.65886502726176, 1.89924742250326, 1.32183863337195, 2.03177857018775, 1.1233158379469
ZC3H8	8	6	2	C5	3.19749201223001, 1.36828132444849, 1.45353998936569, 1.21249651545001, 4.79298972750978, 1.21342007352955, 2.65402113384385, 1.34810351783619
ZC3H7A	7	6	1	C5	3.01597878032193, 6.81065341231847, 1.38454469387641, 1.65464737032114, 1.46792450422972, 1.5882402806224, 2.00059315431806
ZC3H4	5	2	3	C5	1.29916232894107, 1.13392275376088, 1.57777640914245, 1.2620755718168, 1.1270009516856
ZC3H18	8	6	2	C5	6.65615873321974, 1.25639028813795, 2.06332094660625, 1.49682281946068, 2.00158597771577, 1.70399149167589, 1.15135752034283, 1.9893849369369
ZC3H15	8	6	2	C5	2.44124896550629, 4.52691850421794, 1.32471219984643, 2.09453507203962, 1.29231287613261, 1.47794499671385, 1.19090437532568, 1.60295414459291
ZC3H14	6	3	3	C5	3.411866909504, 2.79014856970144, 1.40518885138099, 1.22709990871128, 1.11385963314885, 1.30004433045622
ZC3H13	9	5	4	C5	2.12771857155353, 1.33124386332051, 1.30011280706903, 1.70733352826164, 1.2537881330801, 1.25494254448844, 1.43990390906375, 1.89532975972838, 1.43155013290077
ZC3H12A	4	2	2	C5	1.20535864298588, 3.36397893362839, 1.14654143305608, 1.33662838156637
ZBTB8OS	3	2	1	C5	1.98007661073271, 1.36902462255558, 1.13438429440141
ZBTB7B	3	1	2	C5	1.34788498269287, 1.40768313128511, 1.40037412832649
ZBTB7A	9	6	3	C5	5.54926212479041, 1.23483770059728, 1.90534963058808, 1.79896323563905, 2.12238947230598, 1.94572764662335, 1.27646567973532, 1.25584051712199, 2.68130074750538
ZBTB49	3	2	1	C5	1.2982919355037, 1.12899442668085, 1.24339154734654
ZBTB44	6	4	2	C5	3.05849029125455, 1.14022628710608, 1.76481520846929, 1.44707005494326, 1.68213272506919, 1.57321900473895
ZBTB43	9	6	3	C5	4.62258594956528, 1.17534822360348, 1.54207470137895, 1.29173897801396, 1.66693210749379, 1.29270578177026, 1.2336287436373, 1.2464931990364, 1.75665749032862
ZBTB38	6	5	1	C5	2.42235641916877, 3.98108260368497, 1.26812578195087, 1.40532065832021, 1.15850884352617, 1.63781408717664
ZBTB37	4	3	1	C5	2.56589257204991, 1.7324075493883, 1.16305762766024, 1.39622236152465
ZBTB25	8	5	3	C5	2.84550093559304, 1.19654547253108, 1.23845058860074, 1.23850889736736, 1.37543000104226, 1.80883312591748, 1.13331323668219, 1.41887849776582
ZBTB24	5	3	2	C5	1.97798639864825, 1.10825046339349, 1.3950111487344, 1.1160332498554, 1.16366931223969
ZBTB21	3	2	1	C5	2.19357247621989, 1.39442349454862, 1.22775194172312
ZBTB20	7	5	2	C5	1.20780069107258, 1.11584961834802, 1.28024534818956, 1.20813641115587, 1.47104318038055, 1.20074081900063, 1.44454282525759
ZBTB11	8	7	1	C5	3.01483176700313, 1.29198645606499, 1.57283101494774, 1.34602226614702, 4.75620282769713, 1.57463554753766, 1.34947783424532, 1.74795692074947
ZBTB10	3	3	0	C6	1.63198815705042, 1.19123532307506, 1.11826500495107
ZBTB1	3	2	1	C1	1.22165283071031, 1.12362661269078, 1.59087441333062
ZBTB1	9	6	3	C5	4.57432299812672, 1.62410994145064, 1.68751341059214, 1.92156631798864, 2.13499959912558, 1.1593769275858, 1.53230593042715, 1.11459424068619, 2.23173461244966
ZBP1	7	5	2	C5	8.17858172486213, 1.20726064535305, 1.32431389722108, 1.29210555188181, 1.72224612572796, 1.67660104764348, 1.59900744842235
ZBED5	4	1	3	C5	1.31150521185822, 1.14650131432812, 1.55234851292393, 1.63038545439227
ZBED4	4	3	1	C5	3.34800639217684, 1.10625129439416, 1.32572856133379, 1.27176042407331
ZAP70	13	9	4	C5	2.56910450888511, 5.6213742051186, 1.52826738253473, 1.78312887568914, 1.57900575667146, 1.73487258125609, 3.62499362062187, 2.17877739141371, 1.5483945842625, 1.1350657048013, 2.3720314568555, 1.37554719368988, 2.814526739729
YY1AP1	6	4	2	C5	1.42048155742515, 1.24028497550361, 1.19914048389371, 1.25662285589535, 1.1868765611297, 1.44047579498924
YY1	4	4	0	C4	1.27410615618501, 1.31438256103416, 1.12561061191366, 1.13572905421365
YY1	8	6	2	C5	1.55708416631705, 2.51756419932706, 1.49690043646978, 1.26792337252252, 1.56230541408036, 1.20210680194824, 1.31552254613195, 1.53403471651317
YWHAZ	5	3	2	C4	1.13244347912898, 1.23239581594343, 1.25902401201728, 1.12307532084862, 1.13489131055931
YWHAZ	9	7	2	C5	5.15335088556516, 1.25699412628867, 1.24456935681402, 1.53355868028464, 1.62446835765509, 1.44362183099328, 1.60056756941204, 1.32836056100619, 1.68286642577706
YWHAQ	6	5	1	C1	1.13385039751695, 1.11808853755728, 1.10773572435131, 1.12731859527061, 1.23685738094976, 1.47451101626157
YWHAQ	11	6	5	C4	1.30367774299502, 1.11006278569819, 1.24435896241306, 1.2402858827196, 1.35984839738347, 1.1876238126543, 1.12829586740503, 1.25970951464685, 1.13334484151028, 1.15850819483946, 1.13451882610425
YWHAH	15	8	7	C4	1.67376754604807, 1.20867081928032, 1.30807879885645, 1.19437594900976, 1.11704758011743, 1.1589499557022, 1.27960912592818, 1.28910930839189, 1.21638375815166, 1.45124701270914, 1.19686036671192, 1.1835933982373, 1.18658677669417, 1.20100145387393, 1.44413432518694
YWHAH	4	4	0	C5	2.02472401182651, 1.22288853607656, 1.17780855888472, 2.30701103910525
YWHAG	3	2	1	C5	2.29840036449788, 1.26196566786033, 1.29680171845569
YWHAE	14	10	4	C4	1.95053481998253, 1.31126981168101, 1.39216451901466, 1.38862178896075, 1.46999418412742, 1.4131555420205, 1.28604757350393, 1.40430276809994, 1.52486063367727, 1.66675189736193, 1.14263849186889, 1.24466182360722, 1.26904624502594, 1.64292005973667
YWHAE	6	4	2	C5	2.22767426045409, 1.22594666693523, 1.16961894849693, 1.12665149432098, 1.14429832172041, 1.20083865475634
YWHAB	6	6	0	C4	1.22144149727797, 1.19587146017716, 1.28761852208813, 1.41380189326675, 1.34296757734296, 1.16143402940465
YWHAB	6	5	1	C5	3.88114243816095, 1.50896320521242, 1.124883252769, 1.20445687186547, 1.2083833904161, 1.12424826285962
YTHDF3	7	4	3	C5	2.87089707987242, 1.30158200192795, 1.30968044988254, 1.57052363813044, 1.12796559367403, 1.87924483393639, 2.3264732921527
YTHDF2	3	2	1	C5	2.13926726775243, 1.28890661503007, 1.25384462204904
YTHDF1	4	3	1	C5	2.04577296905516, 1.12620755740737, 1.17638606273478, 1.29672038046356
YTHDC2	8	6	2	C5	4.57869273265193, 3.94316498066736, 1.25035511481822, 1.41252652668766, 2.76037907638166, 1.70091295218927, 1.60919458453784, 1.94623420951419
YTHDC1	12	6	6	C5	8.30118123066137, 2.06270882343075, 2.51658804868899, 1.71347288245357, 2.15253302613509, 1.84016598186407, 1.14040449234014, 1.30332168648073, 1.33215043967775, 2.51754122330139, 1.12748803271195, 1.75863374109175
YPEL5	6	4	2	C2	1.76216633097016, 1.12729701725121, 1.238302506851, 1.14559125068223, 1.32402098929374, 1.6867240657716
YPEL5	7	6	1	C5	4.72858313748313, 1.2281960282084, 1.27669189844347, 1.26642107869538, 1.26033728232801, 1.2222308249495, 1.57257908679438
YPEL3	7	5	2	C1	1.38884535956646, 1.11969730602253, 1.41945394275884, 1.1299429669997, 1.11985436890651, 1.21684774654362, 1.28825107111153
YPEL3	8	4	4	C5	3.03325099933976, 1.17630364838575, 1.2691628402827, 2.26552741008648, 1.22824364753142, 1.12277565656558, 1.91264515319893, 1.12120814430501
YPEL1	4	3	1	C5	1.40591709946067, 1.15720634250556, 1.27411087305364, 1.11698196689438
YME1L1	11	7	4	C5	6.19940923746339, 6.71895606418292, 1.23547902190864, 1.12388639268933, 1.75076234035109, 1.7856352648539, 1.35489024051813, 1.1354777427993, 1.45818621409459, 2.50279064045132, 1.58840725414348
YLPM1	10	6	4	C5	3.20290718139569, 2.29366939580466, 1.19685774034641, 1.18149749456007, 1.50813000713112, 1.22661001262045, 1.10551742544222, 1.14040395832776, 1.44472194186796, 1.39777200118317
YKT6	4	1	3	C5	1.61191544106214, 1.36008276214112, 1.1068831750803, 1.11277670303384
YIPF6	5	3	2	C5	2.10913956981266, 1.16864489592302, 1.2300421212875, 1.18852376317377, 1.23771868692065
YIPF5	9	6	3	C5	2.40439511366766, 1.12685593588073, 1.13813803584837, 3.53865763130799, 1.30868869664927, 1.12505757454935, 1.4585512726626, 1.11534194490391, 1.27722382697592
YIPF4	11	6	5	C5	4.55624191254367, 2.61603827942464, 1.47125068730589, 1.85890954920397, 1.43794400690175, 1.54726003296839, 1.11084648231114, 1.69719834049503, 1.28687237542512, 1.99962865401525, 1.9911168456032
YIF1B	3	2	1	C5	1.2431584528643, 1.26488339169811, 1.16319964646783
YES1	3	2	1	C5	5.13020681348832, 1.74813391029242, 1.30820426452918
YEATS4	10	8	2	C4	1.32966666168994, 1.16500220941034, 1.35649678015364, 1.11321328477023, 1.29169703594452, 1.11024931623152, 1.31890314177587, 1.20224865228642, 1.29686867192197, 1.72292448614807
YEATS2	5	3	2	C5	3.08259951831988, 1.53831039275753, 1.1863527558388, 1.20842429472494, 1.47945513658331
YBX3	4	4	0	C5	6.15643375224759, 1.11317905216688, 1.17400844369306, 1.30094431581255
YBX1	16	9	7	C4	2.40767839150014, 1.50037119203476, 1.35639887399544, 1.71090260325482, 1.52369856728915, 1.61282439717538, 1.66301974760729, 2.11476204341301, 1.75764676545184, 1.16496234381123, 1.48961764621952, 1.15624749782126, 1.21617719536011, 1.80795158447659, 1.1645204766455, 1.54872162424204
YBEY	3	1	2	C5	1.20472906625011, 1.39511713847692, 1.10994919268545
YARS	8	5	3	C5	3.34611410485263, 2.0149664998527, 1.42152228655765, 2.67231613408963, 1.51507239358388, 1.16333112972058, 1.63970459499482, 1.95309093801757
YAF2	8	6	2	C5	4.83216537989581, 1.30120509429116, 1.33898518665211, 1.41985940243284, 1.71460357714684, 1.42324513869617, 1.15115323213565, 2.00090591886623
XRN2	7	5	2	C5	3.09119473291007, 1.290189331638, 1.28746781149003, 2.33344492662959, 1.23483084701657, 1.68124792887613, 1.37979827414025
XRN1	10	7	3	C5	1.77549321904095, 8.26150033653998, 1.95236971819952, 1.57465423391474, 1.74824659661633, 1.9297713404275, 1.40383151353601, 2.6893828299414, 1.16859482087881, 2.62164141265351
XRCC6	11	8	3	C4	1.41955197953596, 1.16090891627595, 1.41968783497608, 1.21699521402089, 1.18193201857015, 1.3986037454986, 1.26013366181813, 1.29382173409764, 1.15115583167355, 1.25986601174927, 1.30363279162781
XRCC5	13	9	4	C4	1.38764562091214, 1.22454579308464, 1.52484623301768, 1.17487484496973, 1.53906433465718, 1.1987271848468, 1.43029336450071, 1.3543823525806, 1.30473994412325, 1.13097049921185, 1.20553421755909, 1.17513955769305, 1.4167962794011
XRCC5	3	3	0	C5	2.22329913621916, 1.98807456075127, 1.1074394859407
XPOT	4	3	1	C5	1.41457849456621, 1.38936585992678, 1.11815004291699, 1.24573389578622
XPO6	6	4	2	C5	3.79283957312744, 1.64047876472498, 1.64082295390077, 1.12167348449497, 1.50763216596643, 1.29439659456681
XPO4	8	5	3	C5	3.33928012216838, 1.44254145863174, 1.1585329462951, 1.17083918823202, 1.48888812359893, 2.15677024190288, 1.30839811778757, 1.45548015822993
XPO1	10	8	2	C4	1.43221610151425, 1.12568119584783, 1.38673179898402, 1.12943796530315, 1.27848906446795, 1.16977954034601, 1.38279167751715, 1.30013125447362, 1.14719080419755, 1.54713986733837
XPO1	9	6	3	C5	5.38555035523209, 1.80512549146248, 2.17892934258636, 1.86873024573097, 1.52367371779536, 1.55434126278567, 2.59919707914023, 1.30490017984249, 3.08201658598355
XPNPEP1	4	3	1	C5	1.5786028115282, 1.18053399912016, 1.33204431318213, 1.30169452040626
XPC	7	5	2	C5	3.7124665231497, 1.20126838953634, 1.22708427620986, 1.27107167200592, 1.49349333363588, 1.33147415095471, 1.3659456916623
XPA	4	3	1	C5	2.30968944844506, 1.1249966379994, 1.37503315640128, 1.70053006406272
XIAP	7	4	3	C5	2.15479064748081, 1.27364095919576, 1.45500815255103, 1.53477213131895, 3.45156440195355, 1.14821743490722, 1.79175125979189
XBP1	4	3	1	C1	1.19889297421447, 1.13440117899052, 1.13465992120055, 1.65620903673673
XBP1	7	3	4	C5	2.92588912587285, 1.1511106144205, 1.33673203879118, 1.19927858849148, 1.67159038094241, 1.37160189015635, 1.10954476195361
XAF1	11	7	4	C5	3.54511305656965, 1.41271105664688, 1.40108873370428, 1.23298593309187, 2.48768032561964, 1.19659839158422, 1.61969136396615, 2.39021730539668, 1.66071202128338, 1.19914380752065, 1.82953499912009
XAB2	3	1	2	C5	1.30919541424394, 1.6765134980157, 1.2488310447807
WWP2	4	2	2	C5	1.21432877923925, 1.15457083302015, 1.33405741460319, 1.22414103238178
WWP1	8	6	2	C5	2.69911900633042, 1.51115167275496, 1.31811512271323, 1.15457632066266, 1.31066794888999, 1.11342790417236, 1.29040888431792, 1.50639715541125
WWC3	4	3	1	C5	2.46277824768738, 1.25378924362448, 1.23089950001809, 1.3770736606318
WTAP	10	8	2	C5	2.25650515274482, 3.74760260629239, 1.53039066472099, 1.18696493849298, 1.29668180522247, 2.91730984044381, 1.29922015017333, 1.1988927332343, 1.29413682753735, 1.71898528368633
WSB1	10	6	4	C5	2.56315773822415, 6.64391297708778, 1.2961207870588, 1.646935388906, 1.68996445392836, 1.22144557128875, 2.43887307860679, 3.59822663878333, 2.54199192071296, 2.15490359206551
WRNIP1	4	2	2	C5	3.3194169188627, 1.15807008729997, 1.42640922450941, 1.19599237219221
WRN	3	2	1	C4	1.14446521237632, 1.17800044320124, 1.23867137833508
WRN	4	2	2	C5	1.23523834714014, 1.63815434586726, 1.35470460649763, 1.47433731095679
WRAP73	3	2	1	C5	2.28258073296206, 1.1937878123042, 1.369161198779
WNK1	9	6	3	C5	7.18496485040543, 2.3675561079523, 1.61349610286895, 3.73759525300635, 1.95017954196281, 1.79998446725936, 3.00096776849711, 1.13250372399147, 2.68150583389083
WIPI2	8	5	3	C5	2.08066299274001, 1.43396119896638, 1.24522783212759, 1.48335794346861, 1.11922618036713, 1.14884495366583, 1.57179296001662, 1.57751612237758
WIPF2	11	7	4	C5	5.15312287923398, 2.3891474497507, 1.18058473724748, 1.31598012637226, 2.8907745093987, 1.51294950763524, 1.30797167745194, 1.11835399207094, 1.57317652356596, 1.60533124580765, 1.81716337966942
WIPF1	9	7	2	C5	2.01895922985166, 3.92863854178636, 1.3448111330273, 2.0598462934711, 1.58410291510042, 1.14519320213869, 1.78347316092707, 2.20938015029431, 1.91792258910125
WHAMM	9	7	2	C5	4.08402511995333, 1.81957044750999, 1.48593687668991, 3.27593321725099, 1.6717079256142, 1.19708258762941, 1.3092925497227, 2.21797026114735, 2.43864782818031
WEE1	4	2	2	C4	1.1398520554765, 1.42399694394114, 1.12536990507682, 1.11681703694118
WEE1	3	1	2	C5	4.12580973380859, 1.14987827020725, 1.11676893567687
WDR82	7	5	2	C5	1.9877100158979, 1.64753642129001, 1.31162619681198, 1.36978818901042, 1.20175099905312, 1.23127459299847, 1.63014745763417
WDR77	3	2	1	C5	1.27480407708277, 1.14175840974751, 1.16255423875045
WDR76	15	9	6	C4	1.45066244031326, 1.10645962748324, 1.65679099599086, 1.18260341958996, 1.20745780421084, 1.16127979501334, 1.27309517960284, 1.37073467588896, 1.37874636462423, 1.19531869603045, 1.16339409412829, 1.17023629167612, 1.19175273530051, 1.14299951351391, 1.87016518810667
WDR76	4	2	2	C5	1.37267629796563, 1.11732744868265, 1.37077597662059, 1.12922254757063
WDR75	3	1	2	C5	1.24718027359013, 1.29898610861706, 1.37897869372384
WDR74	5	2	3	C5	1.96222278634775, 1.78385422124086, 1.59178851515054, 1.1891965587291, 1.5283870246104
WDR73	4	3	1	C5	1.142354706421, 1.39649717409545, 1.22808473406466, 1.33784359662068
WDR70	6	5	1	C5	1.85630820804433, 1.28508503515755, 1.15768251243805, 1.18492733250623, 1.20445140555931, 1.28573004204093
WDR7	4	2	2	C5	1.76616095036963, 1.23991712193099, 1.11700211457387, 1.68340573133421
WDR60	10	6	4	C5	2.02022505718417, 1.85446802880614, 1.24601603833284, 2.82727659681245, 1.21765889097394, 1.31960746523483, 1.1378859597144, 1.43047311544148, 1.20303792519721, 1.43770395282591
WDR6	5	2	3	C5	1.41589446636876, 1.12940598850376, 1.24516027813373, 1.3300235983828, 1.22336535531934
WDR59	4	2	2	C5	1.11520885526887, 1.12158653423466, 1.4608999135011, 1.31177762488348
WDR55	8	4	4	C5	2.34195815204365, 1.16408325486625, 1.2425542749086, 1.33920399170595, 1.27239453734655, 1.47036941802644, 1.5089540941072, 1.53101671320155
WDR54	7	5	2	C4	1.18452550913839, 1.16795445598722, 1.14651047095149, 1.2624912668144, 1.10763392508179, 1.15527202592287, 1.35061561991627
WDR54	3	2	1	C5	2.52985205604052, 1.14203778242152, 1.29174727402527
WDR48	7	5	2	C5	3.15403011029848, 1.28246409595772, 1.56776632045452, 1.34151959752303, 1.5712015387409, 1.56409497158413, 1.77114951735548
WDR46	3	2	1	C5	1.19869155755182, 1.46275811252743, 1.17535850688696
WDR45B	5	4	1	C5	1.74068085613178, 1.20251375766562, 1.18730421265924, 1.12521849177707, 1.15421491614759
WDR45	3	3	0	C1	1.2903063313115, 1.12519948864552, 1.15371125498028
WDR45	3	2	1	C5	1.38824363743078, 1.2207583127734, 1.12764385435574
WDR43	3	3	0	C4	1.15519531111289, 1.17959361249007, 1.15093037916354
WDR43	5	3	2	C5	3.70490325086861, 1.24987093438529, 1.22767639697184, 1.26311193207084, 1.36872725962539
WDR41	7	5	2	C5	1.54033622809831, 1.19995121443095, 2.86324240617273, 1.23236133003248, 1.1489552146491, 1.18410460707633, 1.12632866616351
WDR37	5	3	2	C5	3.42201520639714, 1.18963277247553, 1.35031277339319, 1.12053617688512, 1.46052233082711
WDR36	7	5	2	C5	2.83854463819807, 2.72697669403147, 1.34328437109108, 1.20651053312334, 1.22859830030328, 1.28859770108019, 1.31837767067195
WDR34	13	9	4	C4	1.2861128555527, 1.13781005920533, 1.71235523934465, 1.15974837621202, 1.12265239068646, 1.13805834095097, 1.14223076407793, 1.22607415451077, 1.1476251136097, 1.10599765700678, 1.26914680054279, 1.13520391814679, 1.33092719997905
WDR33	3	2	1	C1	1.16157778180315, 1.15629709105118, 1.15134531854884
WDR33	7	4	3	C5	3.019105794819, 1.380497204829, 1.1088847066736, 1.2425262955473, 2.02304945568167, 1.11201666872791, 1.44387754963203
WDR26	9	6	3	C5	8.7109525199096, 10.6527718874056, 1.80795527853375, 2.06544339664119, 1.97351058967732, 1.25387002966339, 1.15824565872746, 1.63301986252473, 3.25945287596101
WDR20	4	3	1	C5	1.15633990431155, 1.29620819807904, 1.18362695133533, 1.25500975872179
WDR18	3	3	0	C4	1.31840230001578, 1.1192781547863, 1.13059360737064
WDR11	7	5	2	C5	3.06562166807986, 1.3015285935045, 1.5069967688909, 1.46333856425687, 1.28411790312356, 1.72428245168481, 2.14417393291143
WDR1	9	7	2	C4	1.33254527457746, 1.16051955505013, 1.20272117506413, 1.24104064705678, 1.37158044548705, 1.21874337661286, 1.30775680507877, 1.12540647806176, 1.24868886379809
WDR1	3	1	2	C5	1.98530977017099, 1.17577723340157, 1.11157826978173
WDFY2	5	3	2	C5	2.81222028419163, 1.26237979892506, 1.19259164017859, 1.41042737276429, 1.43163640812184
WDFY1	9	6	3	C5	7.26005322635357, 1.35808994359177, 1.97038970266134, 1.38570071695163, 2.71794164295699, 1.36890176713052, 1.27288766570948, 1.14457990181545, 1.99028774972541
WBP4	3	1	2	C5	1.12585269910094, 1.29012777266869, 1.15811461121093
WBP1L	3	1	2	C5	1.11581843131604, 1.33698885707993, 1.11493404187892
WBP11	6	3	3	C5	2.94645165651232, 1.16503264119503, 1.23961912130786, 1.23426874648743, 1.26582006243614, 1.4751682241101
WASHC5	3	2	1	C5	1.38469456022521, 1.13288437646672, 1.33182502713381
WASHC4	5	4	1	C5	1.22763737836737, 1.57338117504401, 1.23523084625994, 1.22616128844537, 1.55353518853295
WASHC3	5	4	1	C4	1.26006905103626, 1.11446113734997, 1.14171160194527, 1.1142083439005, 1.16128798710243
WASHC2C	3	2	1	C5	1.20750382409993, 1.14465583751824, 1.15472436544711
WASHC2A	5	4	1	C5	1.28220205308571, 1.41991369638719, 1.22223233853163, 1.12809924646403, 1.26922645218993
WASHC1	6	4	2	C5	3.33937540783646, 2.23713189463481, 1.17867943733279, 1.43082893729768, 1.46780690094752, 1.3740225660226
WASF2	6	5	1	C5	1.93667231297489, 1.23294591571014, 1.1336196769992, 2.28129437674054, 1.23414340224682, 1.22352393749703
WAS	5	4	1	C5	2.09883782922487, 1.11659525224564, 1.48409538783994, 1.25365416187638, 1.38469515264273
WARS	4	2	2	C5	3.85749712793364, 1.15409317733887, 1.31049070213407, 1.18801948560595
WAPL	5	4	1	C5	3.92689130188841, 1.29433699673173, 1.22148774540959, 1.25655296603234, 1.86102053355869
WAC-AS1	7	4	3	C5	1.45958764872013, 1.37861596413286, 1.40327205606412, 1.12606536434893, 1.52509693227785, 1.12664744105329, 1.23918771921087
WAC	10	7	3	C5	6.92159329798141, 1.19590020541062, 1.63505337767567, 1.64396047980718, 3.20076561498988, 1.8393806567433, 1.39059789863245, 1.1331048001223, 1.27622732683299, 2.4896017486721
VTI1B	3	2	1	C5	1.34581959522264, 1.62046299530878, 1.12143432642198
VTI1A	6	5	1	C5	4.24698455106633, 1.62415378921473, 1.30188594030039, 1.40498561390691, 1.35132422622483, 1.77624895699771
VTA1	4	3	1	C5	1.75498315890838, 1.31561437799937, 1.21305279308032, 1.27469937500142
VSIR	9	6	3	C5	2.43297499914966, 1.79099522924028, 1.11625069846665, 1.78345598618469, 1.10902063774432, 1.13738734407102, 1.40454472101993, 1.10690146014378, 1.1192534212108
VRK3	3	2	1	C5	1.47950024906263, 1.17784036863364, 1.34201639123237
VRK1	10	6	4	C4	1.5146855648249, 1.10870570927055, 1.48914289869609, 1.33248365608964, 1.29812228329413, 1.18103685971988, 1.13466529888122, 1.34211628537012, 1.1052240384264, 1.51128605470861
VRK1	3	3	0	C5	1.25640958611976, 1.25871458454775, 1.52551493233332
VPS8	7	4	3	C5	3.43129235659989, 1.2328405584438, 1.18124756008894, 1.21847672526024, 1.19221284429348, 1.33530071695308, 1.69065187815086
VPS53	9	5	4	C5	2.56636506339128, 1.32232202546481, 1.18207506491997, 1.50742150223173, 1.29282100135751, 1.14762147359468, 1.32196566560014, 1.25015143879942, 1.43282592757731
VPS51	5	3	2	C5	1.78073579029394, 1.20977814017757, 1.1574135307802, 1.39151489233714, 1.53694176529687
VPS4B	8	6	2	C5	8.55523950163177, 1.3799973018407, 1.90739043544922, 1.44132804555146, 2.01050884608019, 1.48522478337656, 1.33125991508228, 1.89603034025885
VPS4A	4	4	0	C4	1.16324814483086, 1.16021653267054, 1.11905161139915, 1.15634433078101
VPS4A	5	3	2	C5	2.21567557224922, 1.32794274654065, 1.1235974717984, 1.19304526558955, 1.19994641646792
VPS41	6	5	1	C5	2.84620671854638, 2.29515768833942, 1.37013186459205, 1.10813440008944, 1.34909844559882, 1.21481296990763
VPS39	7	3	4	C5	1.20581069809599, 1.21493920979431, 1.20135585568266, 1.17594188821086, 1.13656101531634, 1.27582577445293, 1.64530745266258
VPS37B	10	8	2	C5	5.73602739836158, 11.1831005489259, 1.19102921906508, 1.89562315440656, 2.08792375073093, 1.5330800614566, 2.16588525524388, 1.90738910291242, 1.31476692005206, 2.18787364203293
VPS37A	3	2	1	C5	1.14173693180695, 1.14414245826976, 1.15119971965961
VPS36	9	6	3	C5	2.00418204017354, 3.22609904052267, 1.42651442985158, 1.34175325724418, 1.21797026913829, 1.41727505530632, 1.8579323261461, 1.39381917832296, 1.11220770679988
VPS35L	3	1	2	C5	1.36784049775173, 1.19484585246771, 1.10794632942724
VPS35	3	2	1	C4	1.11030508968016, 1.13471494705393, 1.20968270186133
VPS35	9	7	2	C5	2.52548005123032, 1.56313022318627, 1.21461727810849, 1.18895544112751, 2.74679068802806, 1.14943978943343, 1.21776574344655, 1.15817051385853, 1.21930036494505
VPS33A	7	4	3	C5	3.6293237046598, 1.1460002707575, 1.1318076462837, 1.11412761066634, 1.42712311158463, 1.12109283821062, 1.22919524904055
VPS29	11	8	3	C4	1.34403275898021, 1.16070979805408, 1.13913468658772, 1.38543884500214, 1.13736295787237, 1.14833315184104, 1.11326730295322, 1.31267269772757, 1.35735633371977, 1.13840454009401, 1.39152833285957
VPS28	3	3	0	C5	1.28920792488427, 1.63184292477965, 2.20053780894871
VPS26C	5	3	2	C5	1.38495568570255, 1.1935116617186, 1.16657620146003, 1.13901072866233, 1.21571037914455
VPS26B	7	4	3	C5	2.49406875318424, 2.26243886541577, 1.53569949249965, 1.86004146385191, 1.66492979959405, 1.23677935449621, 1.13190125061791
VPS26A	5	3	2	C4	1.32712506108001, 1.12004986423171, 1.12776631814881, 1.15228108713875, 1.12528334657152
VPS26A	5	4	1	C5	4.05801777332386, 1.88336455618882, 1.16297079694731, 1.67368825708683, 1.24528129464159
VPS25	5	5	0	C4	1.22849040800532, 1.13858073612196, 1.16689901392705, 1.12301135096065, 1.19213485255585
VPS16	5	3	2	C5	2.3907831017309, 1.13039726386865, 1.21867405303042, 1.20525518644837, 1.15235686239049
VPS13D	5	4	1	C5	3.34262685033655, 1.19019275137575, 1.27738958542915, 1.20555543898843, 1.55298567682464
VPS13C	11	7	4	C5	1.7513686737688, 8.92164826496676, 1.4347646580217, 1.64694011320993, 2.31369312055787, 2.02920152499794, 2.01155881930349, 1.15539627347767, 1.15291107325813, 3.42852978604191, 2.4334975230033
VPS13B	7	5	2	C5	3.1192077773976, 3.95244649949488, 1.84610976401402, 1.29062237015888, 1.60871039135899, 1.77864415393492, 1.10844794640487
VPS13A	11	6	5	C5	5.34755482658835, 1.55704552488948, 1.84869010865656, 1.55998862349709, 1.91727455320436, 1.7083197613637, 1.31584569284872, 1.12283985251962, 1.49209845739114, 2.0626001966798, 1.73672019018674
VPS11	8	4	4	C5	2.44057052286033, 1.20685134452376, 1.63921364674614, 1.28291582601784, 1.22459009460217, 1.39619176993075, 1.41461639294793, 1.93215923977541
VOPP1	4	3	1	C5	1.29609273267118, 1.36311597954398, 1.14033001539524, 1.24178261006156
VMP1	10	6	4	C5	2.14432889761687, 8.1448646328298, 1.16699204508099, 2.18756468595566, 1.39230012885496, 2.23886313121413, 1.58251573809703, 2.02536863598815, 2.00548876766902, 1.98015613258575
VMA21	3	2	1	C5	1.48557628875032, 2.58299608849766, 1.12470988359739
VKORC1	4	4	0	C4	1.15518237689401, 1.32028171903199, 1.1105132404585, 1.13194924424027
VKORC1	3	2	1	C5	1.14969444972605, 1.95028275239222, 1.23625799168973
VIRMA	7	5	2	C5	2.54949261395394, 1.78636943195279, 1.31996969160626, 1.80389519096642, 1.63668716893224, 1.24599691285246, 1.38683786069541
VIM	17	10	7	C4	1.9430982035926, 2.45011276880759, 1.8626003392721, 2.23637215147491, 2.77477084262375, 2.16287606158261, 1.77535059735683, 2.05470436423093, 1.97068831686944, 2.58860485725066, 1.67606755418686, 1.47823464880242, 1.28856627657266, 1.60454952406896, 1.46487025329964, 1.66159622216198, 1.7425508420778
VHL	8	6	2	C5	2.45806032309054, 1.43493262246924, 1.13147621115505, 1.28080901122094, 1.32954829055785, 1.22333317078576, 1.62957796222936, 1.4472236110498
VGLL4	4	2	2	C5	1.12596545924781, 1.1478470077941, 1.15848983343005, 1.21855568457959
VEZT	6	4	2	C5	3.46556690821731, 1.25052838049586, 1.1769681654831, 1.28694046790176, 1.22782780304707, 1.73144589178078
VEZF1	5	4	1	C5	2.08679809060743, 1.13811372655863, 1.20839319960456, 1.18484740860638, 1.39531867093712
VDAC3	15	9	6	C4	1.6022580334868, 1.13020066762082, 1.18363392068376, 1.11265373927782, 1.19334157995294, 1.14553123931104, 1.31655681490637, 1.1649975895619, 1.27666788261368, 1.12716054722743, 1.35907676142265, 1.10725972076568, 1.21522862428468, 1.16246999743897, 1.57763822058574
VDAC3	3	3	0	C5	1.72486756868475, 1.39677157552118, 1.15952925842362
VDAC2	6	6	0	C4	1.37596917035189, 1.1133352960604, 1.19601780734951, 1.23053939688987, 1.34489624721775, 1.1968714395886
VDAC2	3	2	1	C5	2.29764605161566, 1.11554884188322, 1.40680754879186
VDAC1	11	8	3	C4	1.58966831920723, 1.14288854603332, 1.45186462066106, 1.22304823857363, 1.19391555457412, 1.30569265845271, 1.3125394225621, 1.29473340324936, 1.25266702796628, 1.18543730173832, 1.16884694351046
VCPIP1	9	7	2	C5	2.91371885717658, 2.23888676831653, 1.51851213473297, 1.60021010672905, 1.29049544276262, 1.92904337743745, 1.25039466192147, 1.44974104325875, 1.61096795435712
VCP	8	7	1	C4	1.41217952047058, 1.13136694789122, 1.22407874989033, 1.28143811817319, 1.11938198244875, 1.25947770072907, 1.17778550259023, 1.24076982590031
VCP	8	6	2	C5	2.10331838141509, 3.68979241314752, 1.12769511762528, 1.1413529695195, 1.23711750343042, 1.32647313540266, 1.27663276568792, 1.5575046194762
VCL	10	6	4	C5	2.59776079524487, 1.34016986144636, 1.17504407872967, 2.80441449839778, 1.44777507776187, 1.16055392511565, 1.7535097485693, 1.29400889770783, 1.36296750088485, 1.70699096495494
VBP1	11	8	3	C4	1.59694352064098, 1.15966400586999, 1.12521804268862, 1.11378989351869, 1.23118070981618, 1.33932063655046, 1.25761248842152, 1.2430258773067, 1.22791944791535, 1.11629994280533, 1.37640983250402
VAV1	5	4	1	C5	2.55297079041601, 1.16437771502615, 1.28232510544961, 1.16215598800334, 1.26082606343205
VASP	3	1	2	C1	1.18299180146588, 1.14848684999066, 1.13204287534103
VASP	3	2	1	C5	1.14272643994433, 1.77923303976312, 1.16244194119439
VARS	3	1	2	C5	1.28545017031663, 1.55919840137045, 1.23709278575906
VAPA	8	6	2	C5	5.69081388054488, 1.40959460479457, 1.33154117973216, 1.40965307324028, 1.46822846514284, 1.42779221769412, 1.18291654051509, 1.84745645473533
VAMP8	5	5	0	C1	1.31293773736897, 1.10666230289473, 1.11731327683187, 1.14801525505439, 1.11422461732299
VAMP8	3	1	2	C2	1.16308086007681, 1.11224610451957, 1.13489535840654
VAMP7	3	2	1	C5	1.31528438479623, 1.12055629042518, 1.39350974847345
VAMP5	7	4	3	C1	1.21635865480703, 1.11131166623758, 1.16053329566641, 1.26816272653978, 1.14946250102298, 1.14398419584245, 1.29275702548973
VAMP3	5	3	2	C5	1.40467933629669, 1.10597402480843, 1.18347605109121, 1.18058477272651, 1.18450754727751
VAMP2	4	3	1	C1	1.4738335753525, 1.37612297594992, 1.24585791606182, 1.33497733637802
VAMP2	10	6	4	C5	4.84560410161857, 1.1534448287706, 1.45092927888123, 1.43684486077314, 1.2435010196359, 1.17437529333732, 1.20249785902205, 1.51533309375363, 1.74542014392809, 1.21742030112796
VAMP1	7	2	5	C5	1.25473889928248, 1.24267652774086, 1.19901737176183, 1.46974512244946, 1.37149071482161, 1.43657536077071, 1.11988976458743
UXT	3	2	1	C4	1.10876599718179, 1.13123777348099, 1.1771964313403
UVSSA	3	2	1	C5	1.24068219553414, 1.44301524963416, 1.5740811246719
UVRAG	8	6	2	C5	2.43005804635453, 2.24550119646582, 1.29872980086321, 1.12383161348026, 1.14710113819698, 1.15870924435296, 1.27768432575152, 1.34433820824794
UTY	5	4	1	C5	1.3454415719177, 1.39986434031258, 1.68186099211646, 1.81088346799806, 2.10651374437473
UTRN	12	6	6	C5	9.58798692884737, 2.20256204215323, 2.53832194293214, 3.88888741461004, 2.27985560999802, 1.96571247356802, 1.20678200294443, 1.5908627246978, 1.44297602358746, 3.99953963038423, 1.12923326036667, 2.58806224855698
UTP3	7	4	3	C5	1.61613415840459, 1.27796427640072, 1.1464408107497, 1.15535316761522, 1.19498642067742, 1.14971313020152, 1.17661857165335
UTP23	3	2	1	C5	1.84756354644847, 1.39233235842529, 1.12870960529434
UTP18	4	3	1	C4	1.20687657269532, 1.13836076305018, 1.14680517870819, 1.18051444226277
UTP18	4	2	2	C5	4.39529929586845, 2.07117481195433, 1.19092577602557, 1.12341441326714
UTP11	4	2	2	C4	1.15427668894984, 1.15551638806345, 1.1591977609923, 1.34392691453696
USPL1	6	2	4	C5	5.29824141755546, 3.13787350083312, 1.11412410957528, 1.1423367947815, 1.31261794963011, 1.27181303623416
USP9Y	5	3	2	C5	1.51425723004633, 1.40600987429262, 1.4769924916249, 1.18125256520164, 1.64043401506291
USP9X	9	5	4	C5	4.61488608183921, 1.16798807165973, 1.34792627187972, 1.51846370664327, 1.40504905120034, 1.27887141890679, 1.1219140695848, 1.75224807401498, 1.86780722666364
USP8	10	6	4	C5	4.19192932477708, 1.51808875665102, 1.58042876444099, 1.52036046609581, 1.55014637113841, 1.80425534920753, 1.10599695427217, 1.22451807463157, 1.51555141286355, 1.94562200383102
USP7	7	6	1	C5	2.24881636868066, 1.29849370406629, 1.63754733751738, 1.31482820278535, 1.33923269891497, 1.22254836380791, 1.76247895584741
USP5	3	0	3	C5	1.47829557268247, 1.16649184822903, 1.21660697566074
USP48	8	5	3	C5	4.68338270366376, 1.27413535872341, 1.35424507649411, 1.38574082259995, 1.63009982709592, 1.59981218821591, 1.55625745091704, 1.67552877260736
USP47	7	5	2	C5	3.49813275017879, 1.17897149874667, 1.40610728268292, 1.78504600728847, 1.17257825596503, 1.2958594011767, 1.97547335358071
USP42	7	5	2	C5	3.97376014706208, 1.28927889931687, 1.32614075339548, 1.26212770988361, 1.60857048481385, 1.34960388900064, 1.6182250028138
USP4	4	2	2	C5	2.58787636151812, 1.22882326023094, 1.36775196878238, 1.54530336336872
USP38	5	3	2	C5	2.12928354594416, 1.23909442491646, 1.24322885771777, 1.15488918481926, 1.10592797553387
USP36	6	4	2	C5	7.83062362984517, 1.26753217142299, 1.47846686301741, 1.39738183269473, 1.49332591350927, 1.27614652643297
USP34	13	8	5	C5	1.97088031092654, 8.38660022643218, 1.77779472777597, 2.67790207400817, 2.01509225770912, 2.8954158247435, 1.79043278709957, 1.61410757165999, 1.18800377169134, 1.3825027339539, 2.58330336471592, 1.14830113510868, 2.29506309560998
USP33	10	6	4	C5	4.778362706411, 5.72722533740334, 1.18688996787159, 1.47835843394151, 1.74204381006548, 1.29022728569882, 1.10904522409584, 1.77993058425506, 1.24059297029835, 2.1020365318798
USP3	10	7	3	C5	2.45032704949213, 4.80998066581145, 2.17750882175579, 1.52879299353055, 1.63266914391487, 1.66022363472525, 1.24933713462727, 1.17991793095024, 2.20862129677082, 1.58869720476876
USP28	3	2	1	C1	1.1530871250402, 1.11151323172488, 1.22448119029981
USP28	7	6	1	C5	3.60900007431099, 1.89412049647259, 1.35902882412506, 2.65816737050444, 1.22382753023323, 1.17490188817223, 1.68250472793374
USP25	7	6	1	C5	3.63801035527633, 1.20065567177111, 1.56048993837787, 1.42605038698174, 1.31189366624126, 1.49789989196555, 1.86895985259186
USP24	8	5	3	C5	3.13400853439775, 1.86108380311097, 1.53026488376299, 1.56455029259863, 1.12144846964433, 1.20854318278221, 2.37903761888583, 1.99689451414079
USP22	10	5	5	C5	3.01377220841846, 1.13401980372078, 1.18624757888173, 1.28887468621958, 1.1112110148524, 1.27006903589546, 1.18444721310722, 1.54370257006637, 1.46459360460447, 1.11178631897375
USP16	12	8	4	C5	2.1549458624065, 6.3561705912978, 1.64511171971153, 1.59581893711766, 1.61512054802044, 2.08748492632623, 1.73571661769697, 1.31482881211143, 2.0377456680064, 1.22589176347486, 1.90152391245134, 1.38619398780881
USP15	14	8	6	C5	4.96913274505238, 11.2469370821381, 1.94334174364841, 2.67641163454114, 2.14982324295984, 3.08386649042082, 2.70464887562429, 1.98613455970867, 2.48583274035249, 1.49029085114012, 1.46179616307137, 3.29029501593042, 1.15725970337807, 1.80735817106764
USP14	4	3	1	C4	1.42842283319462, 1.33253795361507, 1.16588838596026, 1.18066046585941
USP14	8	5	3	C5	5.80141600272716, 1.34578270869249, 1.24140545575965, 2.65740148441604, 1.42147998398628, 1.25872792352533, 1.24330040270326, 1.60187840209823
USP12	3	2	1	C5	2.04708046352312, 1.26753831628732, 1.16570171685597
USP11	6	3	3	C5	3.58630450219162, 1.18385541101739, 1.17255475250289, 1.23337492683431, 1.10582886414352, 1.32462785947365
USP10	8	5	3	C5	7.30806329574934, 3.0377829116297, 1.23121105353205, 1.21855084640789, 1.35557793142514, 1.30012473354433, 1.21661514408442, 1.41241256221369
USP1	17	10	7	C4	1.7497055521935, 1.34353392445894, 1.20415777541766, 1.98636977434268, 1.26794855500201, 1.43810642821276, 1.22657975716235, 1.43435324256116, 1.67616016268372, 1.46606136752566, 1.38836248544443, 1.45238069166043, 1.14060085292582, 1.31358033548545, 1.26226730375739, 1.34492527916984, 1.92954138274217
USP1	5	3	2	C5	1.26733711346847, 1.1181701534921, 1.18740071840313, 2.26885984807753, 1.17213439905443
USO1	6	4	2	C5	2.25573403012325, 1.32000471197018, 1.25149052050095, 1.26563487497957, 1.6812114067622, 1.5954283362883
USF3	7	5	2	C5	3.41421593585972, 1.2830739516192, 1.2186972897174, 1.35498850701118, 1.22054701067302, 1.23679145028621, 1.70737173940932
USF2	9	5	4	C5	3.92737260371215, 1.26887490258573, 1.19261563778751, 1.50526099200777, 1.16051564539155, 1.14322593934977, 1.97612503410483, 1.81009183910372, 1.70591764877182
USE1	4	3	1	C5	1.81149457768032, 1.28540860805636, 1.51319868280208, 1.13346149133214
USB1	3	3	0	C5	1.81393412474157, 1.11610846697907, 2.86813668056103
UROS	5	3	2	C5	1.291678153872, 1.24747934711685, 1.28466064794455, 1.32472015009475, 1.23167613620291
URM1	3	2	1	C4	1.22409053635579, 1.11750152746904, 1.10795927954566
URI1	5	3	2	C5	1.95317967106139, 1.11473594687197, 1.15515624320646, 1.1805196943203, 1.14800632611503
UQCRQ	12	9	3	C4	1.34639195257068, 1.20359661840062, 1.19960051084155, 1.21382815060487, 1.29627391980716, 1.1484990385516, 1.18693232204898, 1.27951734117138, 1.26009460584348, 1.22869556417309, 1.26974055834547, 1.20633007754984
UQCRH	13	10	3	C4	1.48925403441344, 1.25389179878598, 1.31216766985636, 1.39369724722333, 1.169858337313, 1.17609961898584, 1.26372397318648, 1.28702831905624, 1.58597971889207, 1.3472984128133, 1.18663303402189, 1.25706836104261, 1.21279688012931
UQCRFS1	6	5	1	C4	1.11599887682774, 1.13210036875707, 1.10955915243825, 1.21703418444932, 1.15771138026324, 1.11238689322818
UQCRC2	6	5	1	C5	4.75184979718408, 1.25527481845548, 1.28082033380422, 1.39075736712335, 1.16676421420838, 1.59607820211652
UQCRC1	9	7	2	C4	1.27435626999354, 1.13754166588337, 1.23571045173951, 1.16337633558949, 1.12733569852156, 1.12774308902952, 1.11738879532667, 1.1163341153201, 1.16833783188041
UQCRC1	7	6	1	C5	1.82257153629887, 1.13050329997286, 1.20532223341405, 1.19368190190276, 2.46840337758151, 1.12532295768601, 1.4143935528204
UQCRB	3	2	1	C1	1.15915283719811, 1.14394179540248, 1.22575289311203
UQCR11	3	1	2	C1	1.22033219688447, 1.15973961323955, 1.18705621290563
UQCR11	3	3	0	C5	1.22659524550913, 1.3000875056428, 1.78409615301156
UQCR10	10	9	1	C4	1.46122121606877, 1.21515619112607, 1.15495515895152, 1.10800467879248, 1.21260797952101, 1.13508687060585, 1.35482991782059, 1.41870832396003, 1.155965619264, 1.21888573239241
UQCC3	4	4	0	C4	1.17628746470755, 1.11654060508302, 1.24120507451221, 1.28882153238327
UQCC2	12	9	3	C4	1.54210901561948, 1.18182159684446, 1.27204071987988, 1.11809159435948, 1.14557347218422, 1.1339255037457, 1.21341481254808, 1.37047741576749, 1.28489802763598, 1.16494671872126, 1.24106618473383, 1.37868861755199
UPP1	4	3	1	C5	2.05871375923297, 1.13116880681325, 1.24835952003333, 1.19301987716186
UPF3B	7	4	3	C5	2.09010144009204, 1.18755557805294, 1.27976888450443, 1.14151776676556, 1.11644585968058, 1.48221234590221, 1.2508516819828
UPF3A	8	6	2	C5	4.23384094992645, 1.60619425095075, 2.16028421127083, 1.1443415158286, 1.20705445373766, 1.49049075964447, 1.13572657506916, 1.50423831246123
UPF2	11	7	4	C5	2.13867703180551, 7.2922503270123, 1.19450769328066, 1.59308998502114, 1.8089679753487, 2.33277516888518, 1.34142397886194, 1.21408995080494, 1.7537616467483, 1.81324634795927, 2.37525819956862
UPF1	4	3	1	C5	1.37647132463474, 1.15160397585757, 1.50589643827108, 1.31488047335633
UNKL	5	4	1	C5	3.04149152975152, 1.30545315631656, 1.36355794084307, 1.2664893918751, 1.65099627320449
UNG	4	2	2	C4	1.31506173803571, 1.23486651963655, 1.14750193344739, 1.22615836946087
UNC45A	3	1	2	C5	1.12473358451693, 1.12969748712849, 1.18976439381163
UNC13D	10	5	5	C5	2.51384023675678, 1.38639068940896, 1.22127076795191, 4.96161725646359, 1.56638111019282, 1.14156162315177, 1.59354044942117, 1.26540976025127, 1.67984922300942, 2.07896896951871
ULK3	3	2	1	C5	1.23820076215442, 1.18569789852668, 1.1188108930238
UIMC1	8	5	3	C5	3.31603861717573, 1.11691775124555, 1.14917402839385, 1.1178693742019, 1.35683156083659, 1.14487233697649, 1.14751625980011, 1.52256871307106
UHRF2	8	5	3	C5	4.08498963248322, 7.90327424830996, 1.46083450844952, 1.54948659823422, 1.73465890857497, 1.20031552413076, 1.93772647701724, 1.92185443051604
UHRF1BP1L	5	4	1	C5	2.47450619292197, 1.34797675997348, 1.15270209762723, 1.19081200821042, 1.22419048046678
UHRF1	10	7	3	C4	1.36546378118165, 1.15929461658018, 1.20187200591302, 1.20968309173034, 1.3397541618757, 1.16861615801935, 1.13616244315138, 1.35965258407196, 1.14130281727, 1.38877785639237
UHMK1	8	5	3	C5	3.90133339028225, 1.71542128070905, 1.51926552686694, 1.45620445157236, 1.40137036334158, 2.05890129923367, 2.07409747875641, 1.40536554221913
UGP2	4	2	2	C5	2.0386670152827, 1.19148907108113, 1.22117403976968, 1.34243941060717
UGGT1	8	5	3	C5	3.72977201761121, 1.55183382592266, 1.35520910020655, 1.77365403189552, 1.29745316543147, 1.36869797824912, 1.13049188169403, 1.66644893111722
UFSP2	3	3	0	C5	3.25620504260503, 1.27238985815095, 1.21951708704134
UFM1	7	4	3	C5	3.87660181192557, 1.42921831724855, 1.20999378003045, 1.20920683979429, 1.36231575400599, 1.52615591780135, 1.11484534164449
UFL1	8	7	1	C5	2.49926291148715, 2.25886683244496, 1.12685391035091, 1.44820985373299, 1.93532699008408, 1.23010118591808, 1.14610711672724, 1.23468308904965
UFD1	8	6	2	C4	1.54725346191408, 1.28668575602144, 1.15351957324673, 1.11401311998942, 1.13807929930858, 1.15899361654089, 1.12984844061362, 1.1838743153516
UFD1	5	3	2	C5	2.67436446002563, 1.2957131561573, 1.13962137625488, 1.85917430687155, 1.37354398688475
UFC1	3	2	1	C1	1.13223034398597, 1.14223372536139, 1.107218727277
UCP2	12	7	5	C1	1.39567807811952, 1.28440679127013, 1.19100743741673, 1.4512527838278, 1.14080372316055, 1.2186133612931, 1.15682293485589, 1.16752431138761, 1.34716860900179, 1.18844947302628, 1.19089286987392, 1.17436774554461
UCP2	4	1	3	C2	1.17110241680917, 1.17375060506329, 1.4079897350385, 1.19467989507591
UCHL5	6	3	3	C4	1.41352665792763, 1.13401648391627, 1.12787315718253, 1.12253317377058, 1.11777685309971, 1.31117337157463
UCHL5	4	3	1	C5	1.57684803031904, 1.11903516647598, 1.15106494131859, 1.20570292883479
UCHL3	5	3	2	C4	1.34148318454158, 1.23846958009125, 1.19473948430432, 1.10720349354576, 1.22007045493823
UCHL3	3	2	1	C5	1.45203772254338, 1.14523856326085, 1.1130385962512
UBXN7	8	6	2	C5	2.96321241280878, 3.54482252661318, 1.78045528885846, 1.55962164313801, 1.52559718619625, 1.64580287006871, 1.17537876178897, 2.29569356700057
UBXN6	3	2	1	C5	1.20312714229926, 1.15244461388556, 1.30380949251743
UBXN4	3	3	0	C4	1.17248975279809, 1.3144194062048, 1.16561944540183
UBXN4	12	8	4	C5	10.2380892735341, 1.26298172787837, 1.533977147639, 2.49420587700103, 1.56721047443264, 2.58227711252382, 1.83944964995467, 1.55965889888939, 1.45069540490681, 1.34583616756775, 2.33844471069494, 1.13803649943532
UBXN2A	5	3	2	C5	1.78537947870475, 1.21832684073379, 1.16880872250107, 1.24833224000068, 1.16175838231873
UBXN11	3	2	1	C5	1.24079565889432, 1.12657307333904, 1.1367481002732
UBXN1	5	2	3	C5	2.57500429028672, 1.12307968507455, 1.77784265761495, 1.18321145384679, 1.12588074396508
UBTF	5	4	1	C4	1.17318663519449, 1.27411506465426, 1.12753942211509, 1.13648262520657, 1.19542837997899
UBTF	7	4	3	C5	2.75509335698777, 1.29842969523362, 1.24387385880402, 1.51524395095981, 1.30128009453255, 1.32404862194968, 1.13977581758511
UBR7	5	2	3	C4	1.15238036779725, 1.15946164963654, 1.14824904408326, 1.1070242401796, 1.18147323234464
UBR5	10	5	5	C5	2.8949988191978, 4.13681918866707, 2.44139021692031, 1.49066758617207, 1.18657095559801, 1.13289338024337, 1.52044935535747, 1.48091122310978, 2.20627355572859, 3.01926569614168
UBR4	9	5	4	C5	2.0685354329919, 1.3871354019352, 1.2530036799875, 1.23199912065945, 1.299115448194, 1.14317401230658, 1.64222373307865, 1.29515323038182, 1.62059888251392
UBR2	11	7	4	C5	4.30587030388137, 5.99435454237181, 1.25735777986442, 1.5224068750515, 2.96868579683583, 2.12028304619287, 1.41295622706056, 1.13315352519386, 1.84840135790853, 1.20343088356458, 2.05279902801281
UBR1	9	6	3	C5	3.00913933932534, 4.31888923062255, 1.17335014966625, 1.24969273215825, 1.41521248073378, 1.13102038289327, 1.15923907591104, 1.10943008624549, 1.57946893591754
UBQLN2	6	3	3	C5	2.31419293260214, 1.56744731539892, 1.1800595391952, 1.15447619100109, 1.32303565212947, 1.16774870423439
UBQLN1	8	5	3	C5	4.3181176975396, 1.21793797960253, 1.83457253117526, 1.54230285779025, 1.17523101582191, 1.23427173674189, 1.12428958464405, 1.55309201080909
UBP1	6	4	2	C5	1.26239091705953, 1.20622531968366, 1.21345246626417, 1.32829479907852, 1.20809174167708, 1.5296084788922
UBN1	8	7	1	C5	3.54551050588775, 1.35757621367868, 1.4327917084636, 1.57661154824062, 1.24904030001175, 1.64962308596973, 1.99319994605278, 1.62253385885356
UBLCP1	3	2	1	C5	1.57180870921478, 1.11836500869101, 1.12677273024729
UBL7-AS1	3	2	1	C4	1.140533328143, 1.20964244626614, 1.32991461274152
UBL7-AS1	3	1	2	C5	1.20619055560393, 1.18361325138175, 1.17777547597954
UBL5	10	9	1	C4	1.37609511271777, 1.1598291873961, 1.22507976933289, 1.23129263955071, 1.24685116079188, 1.15599638629019, 1.50747522604322, 1.42917457152265, 1.19240724992064, 1.13882178184641
UBL5	4	1	3	C5	1.51627113848059, 1.19228464498884, 1.31956352451254, 1.12979840330898
UBL4A	5	4	1	C4	1.12207868025389, 1.12339860351299, 1.17056239121039, 1.11499244684036, 1.12390184132963
UBL3	4	4	0	C5	1.76057967351912, 1.17660025927846, 1.32729198859419, 1.39991135532156
UBFD1	5	4	1	C5	1.68735609629073, 1.23694337417599, 1.21302976797009, 1.1756070584159, 1.39428899842689
UBE4B	6	3	3	C5	1.21350242546353, 1.14292248671621, 1.16247356160093, 1.43536075525509, 1.26553708862513, 1.34900335759154
UBE4A	8	5	3	C5	2.63793054565377, 2.50870632566148, 1.2380918748195, 1.22946041626398, 1.17348871346348, 1.11712674416036, 1.2942143726292, 1.56250587470489
UBE3C	7	5	2	C5	3.3090220936144, 2.36497689129798, 1.32810857338483, 1.17044442340825, 1.42800499767085, 1.26201107464101, 1.52554421850416
UBE3A	9	6	3	C5	4.38092891827158, 1.32383274437736, 1.84852376622942, 1.39260453742284, 1.32010322676439, 1.20998488019905, 1.4306362810588, 1.35430235619178, 1.76719996610444
UBE2Z	4	3	1	C5	2.82064616936722, 1.86923501437153, 1.1242562339429, 1.58076050493626
UBE2V2	8	7	1	C4	1.14581414775466, 1.16457289200408, 1.38703447881737, 1.11849587946134, 1.19519821911588, 1.15077834159165, 1.13068624280055, 1.11488132640175
UBE2V1	4	3	1	C5	2.45390017780087, 1.11556032414669, 1.33635052460662, 1.16760870783556
UBE2T	15	8	7	C4	1.38363115447511, 1.11410801470515, 1.31204133668105, 1.13222476460273, 1.22853010731423, 1.11290916714694, 1.22974846644751, 1.23685822927219, 1.40285000597977, 1.23529470648367, 1.15078424381909, 1.2393025782583, 1.13822310427647, 1.34471446426329, 1.51088730759152
UBE2S	17	10	7	C4	2.23683632723515, 1.41756460824695, 1.24783824360172, 2.17877162763891, 1.52592363240943, 1.68186005930335, 1.45477645273745, 1.6489254858815, 1.5322828604592, 1.5237354230615, 1.54373825238779, 2.22678592793707, 1.52011928576229, 1.32851469866624, 1.4297125393254, 1.55938215937409, 2.35351734288866
UBE2S	4	3	1	C5	1.52102614846439, 1.44878704214609, 1.73585666425422, 1.1529890579546
UBE2R2	5	3	2	C5	1.21103790625446, 1.17980755293474, 3.6407149023288, 1.17004803610709, 1.28240062641996
UBE2Q2	7	6	1	C5	2.66283368878037, 2.8522292328843, 1.13390398008739, 1.15008500349421, 2.06240465616771, 1.58177471025931, 1.51900367965306
UBE2Q1	3	3	0	C5	1.38483491310729, 1.72983606274524, 1.22261352427708
UBE2N	13	10	3	C4	1.46215879644191, 1.11076321248076, 1.12174065274562, 1.13175946849208, 1.20327997153096, 1.1685279565054, 1.11325174559265, 1.26697704188936, 1.22946107278689, 1.20343374770113, 1.19213724315489, 1.10738420754836, 1.23733972020265
UBE2M	5	4	1	C4	1.10691656309573, 1.310366233515, 1.13344850312591, 1.12887642412842, 1.12132381481826
UBE2L6	5	4	1	C4	1.11560339634534, 1.11473475039704, 1.2609622707648, 1.14751647813499, 1.15030374230462
UBE2L3	7	7	0	C4	1.32443293544856, 1.15279065219748, 1.2226297956067, 1.16866863252974, 1.34749603205811, 1.33915103307334, 1.19967587658725
UBE2K	11	7	4	C5	3.10850597642539, 1.11405462055107, 1.50921434948123, 1.13729013096154, 2.71267584105559, 1.19364329351812, 1.21277553480014, 1.42338541819579, 1.18267228680138, 1.47870216702451, 1.50050750953936
UBE2J2	3	1	2	C5	1.14093375537965, 1.45104287501685, 1.30336435016934
UBE2I	5	4	1	C4	1.4177750851811, 1.41260324847891, 1.35477236126203, 1.15531773097652, 1.19880206954768
UBE2I	8	5	3	C5	1.5650153291001, 2.80595560040717, 1.37470311126951, 1.57206201010044, 1.25050821199394, 2.70140311998601, 1.21726621611608, 2.15554583657205
UBE2H	7	6	1	C5	4.14315267438228, 1.3232539256122, 1.40632657485144, 1.29340502235382, 1.3093085726278, 1.17585602127222, 1.73096703714117
UBE2G2	9	5	4	C5	4.64976810918582, 1.40583893432666, 1.46125839996189, 1.94697178628162, 1.28578383300626, 1.65370920775681, 1.32666907135598, 1.73663640625068, 1.19150079364884
UBE2G1	3	3	0	C4	1.10788316556154, 1.17659964049967, 1.11111658888215
UBE2G1	4	3	1	C5	2.13264604703334, 1.19797599765909, 1.12109607688284, 1.36600430176425
UBE2F	4	1	3	C1	1.40352833658511, 1.16551904378819, 1.13585014726432, 1.26045788110573
UBE2F	5	4	1	C5	2.07785802201145, 1.18384650341602, 1.14384478953565, 1.1772433594197, 1.16423054652099
UBE2E1	5	3	2	C5	3.00159784086269, 1.56632633496972, 1.34531858565008, 1.21859161643735, 1.94372708266989
UBE2D3	10	8	2	C5	1.29359853631308, 6.00416443499061, 1.15266338213553, 1.21837223155041, 1.72542634089245, 3.96837609441221, 1.32525506606828, 1.33190979265785, 1.11008853889842, 2.09888489008353
UBE2D2	3	1	2	C4	1.1485759554355, 1.13160675940377, 1.1513768419386
UBE2D2	4	4	0	C5	3.64481256886368, 1.12499352139474, 1.17127340966508, 1.26661904273882
UBE2C	17	10	7	C4	1.46302089771283, 1.49420441956002, 1.20355827006369, 1.68508205770524, 1.34390163449474, 1.44839346144715, 1.27028711881929, 1.55525593985227, 1.43886794049313, 1.38731322853419, 1.43328714656357, 2.07848724408668, 1.68761514538709, 1.37380582355142, 1.19620447696721, 1.44701921550492, 2.59428518505812
UBE2B	8	6	2	C5	4.25053439605319, 1.19187329539253, 1.20487086607875, 1.37380827643277, 2.40327581961412, 1.35402318287902, 1.59295349999219, 1.65450638117675
UBE2A	7	4	3	C4	1.3084100064857, 1.18185314113625, 1.1144221143238, 1.39593599000143, 1.11437261984219, 1.14196231322221, 1.27199696535434
UBE2A	6	5	1	C5	3.25662870684423, 4.44768857295913, 1.12101777272869, 1.55299636626651, 1.14987681293117, 1.24869660149174
UBC	9	6	3	C1	1.54424424347088, 1.30875421191859, 1.39380113385102, 1.15023469248033, 1.32172482843161, 1.15581663784139, 1.1937028933956, 1.12184253007779, 1.35655254146549
UBC	5	2	3	C2	1.11755942473666, 1.12674538874758, 1.11793722583529, 1.23922642112101, 1.11120896362767
UBC	5	4	1	C5	1.26234192142737, 1.12050630110386, 3.02740981548701, 1.23279220315527, 1.17074265920259
UBB	9	7	2	C1	1.40769019998719, 1.15836808035851, 1.13385698371856, 1.34255347076625, 1.20529372807379, 1.39771396515644, 1.16640515776469, 1.27479369990774, 1.47955783296037
UBB	4	0	4	C4	1.38798871349745, 1.29540115922852, 1.28807836613604, 1.38391149032478
UBB	3	1	2	C5	1.84307012293293, 1.22505721990638, 1.11880042054034
UBASH3A	3	2	1	C5	1.17748970539656, 1.12627091019032, 1.17792292943633
UBAP2L	8	4	4	C5	2.07314771244504, 1.21022344025688, 1.83037305054986, 1.17239835190948, 2.32228411982142, 1.16998355173142, 1.45629975303324, 1.13797924043345
UBAP2	5	4	1	C5	2.6476712682968, 1.28693393232558, 1.14431712617363, 1.12428833909939, 1.4339673598801
UBAP1	4	2	2	C5	1.21389493415302, 1.17489436086095, 1.13617084566511, 1.25927823317628
UBALD2	4	1	3	C4	1.51192612792281, 1.11819417656508, 1.14317385691434, 1.13059840912425
UBALD2	6	2	4	C5	2.12849552687603, 1.10825046582771, 1.33989909533705, 1.31056761167828, 2.25919859294288, 1.25953836327351
UBAC2	7	6	1	C5	2.51498088346157, 1.23359133917238, 1.11065838778511, 1.17624241910734, 1.11783676005177, 1.18694262026473, 1.22923523442811
UBA7	3	0	3	C5	1.36119470430094, 1.2427423641026, 1.54698513597824
UBA6	8	6	2	C5	6.6549008938329, 1.18652205035803, 1.82683361907891, 1.51631259897032, 1.89981350636759, 1.80874841422675, 4.10178824435689, 2.20429557811181
UBA52	4	3	1	C6	1.70936828425969, 1.57984494870185, 1.20633193852253, 1.28750715492482
UBA5	7	5	2	C5	1.80096072269572, 1.56502922473626, 1.17963536573076, 1.3619433098474, 1.15609832031218, 1.18760356980626, 1.11913354514844
UBA3	8	5	3	C5	1.91734551735606, 1.11661071678101, 1.20014881350438, 2.8313733679402, 1.24455067003143, 1.58021382673962, 1.24556293399273, 1.51299845840808
UBA2	9	6	3	C4	1.44476444158573, 1.52537322306454, 1.15440094085706, 1.19595843550667, 1.11573296288573, 1.14794907122008, 1.11080130768764, 1.12009091099033, 1.26599179234565
UBA2	4	2	2	C5	1.93249699098802, 1.27634888837364, 1.16151034474563, 1.11316429201884
UBA1	6	2	4	C5	1.44362528447543, 1.18367787705956, 1.26916004137744, 1.28351861812326, 1.10654664144466, 1.30279770191186
UAP1	4	3	1	C5	2.25537487438098, 1.35963038860304, 1.11484189837608, 1.27254206545281
U2SURP	3	3	0	C4	1.25384155938476, 1.24616967184546, 1.27216727517246
U2SURP	11	8	3	C5	3.97609520731354, 5.83459790454149, 1.46261510502964, 1.98327943766929, 1.49219492652879, 2.08266354683992, 1.20015813956285, 1.41003522249258, 1.53644214393668, 1.78688701383053, 1.87820202556334
U2AF2	4	3	1	C4	1.13359960878299, 1.13318939132163, 1.17702669744804, 1.10905050988244
U2AF2	9	6	3	C5	2.62731497997175, 3.91347689112014, 1.32295951160747, 1.16750006745444, 1.18334928891117, 1.20728555871017, 1.66999087902916, 1.21566318589337, 1.2502465583131
U2AF1L4	5	3	2	C5	2.56119985531891, 1.19893553907643, 2.38967364655444, 1.686093156916, 1.20044637604202
U2AF1	7	5	2	C5	5.55317036012116, 1.28572714004698, 1.28041845910653, 1.2845670552064, 1.29425950698313, 1.48778815425744, 1.5043836946337
TYW5	6	4	2	C5	3.28694945152699, 2.96271135352501, 1.25252575045306, 1.63845295866063, 1.23091056721529, 1.53273153017939
TYW3	3	2	1	C5	1.84098813229264, 1.74855047270075, 1.22592331510981
TYMS	17	10	7	C4	3.96134075173762, 2.02632207623745, 1.54439279451253, 5.00655856283198, 1.92460523990963, 2.46720455217615, 1.7397416353585, 2.43522690809424, 2.84808336846176, 2.76400935436905, 2.40770560626726, 2.44661554933316, 1.32596003528877, 2.06684842224291, 1.94234887193918, 2.54408214787081, 5.39995055569536
TYMP	7	5	2	C5	3.04943901197685, 1.11439907684867, 1.41167623779139, 1.21888114111632, 1.2855297840019, 1.33965608886499, 1.39392288936972
TYK2	7	4	3	C5	1.89775503536935, 1.32621158765853, 1.17364990638257, 1.35969628978395, 1.13437393203065, 1.36469354741453, 1.3912685152165
TXNRD1	4	3	1	C4	1.16854914457846, 1.24828597919422, 1.10918914492787, 1.1621342927317
TXNL4A	9	7	2	C4	1.3713741679834, 1.27532410757652, 1.12397344913384, 1.1913861549416, 1.21235486653671, 1.30889893684656, 1.14610662696349, 1.13426634706015, 1.15734054482241
TXNL4A	3	3	0	C5	1.38793739787656, 1.12992403851726, 1.45508078264793
TXNL1	4	4	0	C4	1.36508048426679, 1.12935542114653, 1.11758028158552, 1.11673972761655
TXNIP	11	8	3	C1	1.29388203201217, 1.11521269366176, 1.82329672966624, 1.2596713552669, 1.33200178822675, 1.2440563220606, 1.12635998052041, 1.39607006604901, 1.24628432319713, 1.34106025605048, 2.01245149186963
TXNIP	6	0	6	C2	1.32519780003979, 1.22330700976455, 1.1920392466997, 1.42882851195046, 1.19530599597423, 1.22500287046825
TXNIP	4	1	3	C3	1.11041025244987, 1.1243969561163, 1.58534608190037, 1.35084393051004
TXNIP	9	7	2	C5	2.38077380972634, 1.37661922861115, 1.35524282800112, 2.28558678364381, 1.18651597603403, 1.32648895327638, 1.19358886693938, 1.27506930347721, 1.30661449997165
TXNIP	7	4	3	C6	2.19391465034935, 1.58775458603182, 1.36102749219403, 2.53874572908597, 1.4787868582947, 1.78422713003578, 1.34830988857566
TXNDC9	3	2	1	C5	1.6830452497558, 1.15644936162356, 1.25242971884992
TXNDC17	13	10	3	C4	1.87220225074282, 1.4896002579617, 1.22471633300317, 1.32142719586733, 1.28830946114299, 1.46814046905414, 1.32661055551908, 1.61164318344849, 1.7200807060536, 1.5833422612887, 1.19294694601551, 1.46422355891168, 1.59675639297883
TXNDC15	9	6	3	C5	2.17797716212562, 1.21165540987423, 1.11579711799976, 1.20880061654298, 2.27230105543338, 1.143777834654, 1.1302062877747, 1.27751530273535, 1.79312758594725
TXNDC11	6	5	1	C5	2.90144328989575, 1.78515042929175, 1.43364669785959, 1.28639728085787, 1.12710840926713, 1.32364090106977
TXN2	4	4	0	C4	1.13875520189855, 1.13238812605257, 1.22163387142075, 1.11149514585467
TXN	13	10	3	C4	2.14983244201617, 1.43577254363746, 1.3372249728738, 1.954424631462, 1.32897603134759, 1.53383609249316, 1.4300666009437, 1.8790393577191, 1.84776423140256, 1.57934502229877, 1.38658658628372, 1.5303216835819, 1.74171598117548
TXLNG	3	3	0	C5	2.84069710632728, 2.67286594146906, 1.10644798241654
TXLNA	4	4	0	C4	1.19629334012824, 1.17530671958084, 1.13748251967847, 1.18974374940974
TXLNA	4	2	2	C5	1.93068618300265, 1.41091628793631, 1.25790021619672, 1.1483806118495
TWISTNB	5	3	2	C5	2.63373874075978, 1.15280820571161, 1.20663354275231, 1.5741500418427, 1.44234814735187
TWF2	3	3	0	C4	1.14020765792388, 1.19710402878313, 1.19068929355808
TWF1	7	6	1	C5	4.88481302948714, 1.15737432794065, 1.39215173418736, 1.29631728536487, 1.35359441355943, 1.23878540272786, 1.48636334298817
TUT7	9	5	4	C5	6.04481591159247, 1.46265359177533, 1.41377538514561, 1.68318407246231, 1.47276877645984, 1.32411698808002, 1.26327015403152, 2.14225884690146, 1.62461138471502
TUT4	12	8	4	C5	5.01451341705691, 10.6003688273797, 2.98209643722197, 2.12709689059109, 2.14383382674323, 4.69623243094353, 2.72614922743619, 1.89984005896527, 1.43196149526698, 1.87636180730394, 1.40223566871974, 3.2254882340825
TUSC2	3	2	1	C4	1.1727107922428, 1.12356642517721, 1.14964353023542
TULP4	6	5	1	C5	2.17390770050174, 1.42420950749908, 1.30982651632832, 1.52149605157041, 1.18865574968351, 1.8504453279352
TUFM	5	4	1	C4	1.46545709587284, 1.10781514042504, 1.19985246364774, 1.15726588381028, 1.23997639597636
TUFM	3	2	1	C5	1.58399234422522, 1.10860063915559, 2.43475171153066
TUBGCP4	3	0	3	C5	1.11840990457107, 1.14359231463775, 1.29993237374039
TUBGCP3	5	3	2	C5	1.341974245126, 1.1184874158245, 1.21228617796302, 1.24288555033926, 1.38011877416872
TUBGCP2	8	5	3	C5	3.30639078499711, 1.54473654196563, 1.24810272016777, 1.43616784641454, 1.27953175845225, 2.22089160836805, 1.46237041275004, 1.73081514941912
TUBG1	6	4	2	C4	1.15356471047859, 1.26145869223487, 1.2423608812757, 1.16567366837312, 1.14156695306209, 1.2031182445509
TUBB4B	17	10	7	C4	1.62670762251522, 1.30738805032385, 1.12221851836399, 1.53456978986146, 1.26200913715263, 1.2951934323329, 1.28899386561067, 1.32437449054724, 1.36303031567407, 1.54485283950026, 1.27353489337424, 1.67385932420008, 1.17154240202692, 1.16602827231115, 1.23382316737539, 1.21052038177335, 2.43238257353953
TUBB4B	3	1	2	C5	1.60636090447942, 1.15672218322214, 1.22319581983593
TUBB	19	11	8	C4	2.96971157799927, 2.32995282886828, 2.26796942815909, 5.15578039100273, 1.78494904572216, 2.23218227200905, 2.58859520088439, 1.97415594816071, 2.54943147738853, 2.88047353691592, 2.66470489838512, 3.20480925433555, 3.48242075548823, 2.22563228555846, 1.60446270114449, 2.53287350698861, 1.93767101329003, 3.36505619267495, 4.01957671037277
TUBA4A	4	1	3	C4	1.17592583024104, 1.30569896810904, 1.14407963831613, 1.21005213508775
TUBA4A	4	2	2	C5	1.81284853727974, 2.3462039898376, 1.61432313285245, 1.51954557792928
TUBA1C	14	9	5	C4	1.38532421330832, 1.30137113197591, 1.42517410650078, 1.21698028617155, 1.22381975133391, 1.17230846221147, 1.22572709885413, 1.25959331568849, 1.21211082000793, 1.20408531930923, 1.23169515112927, 1.15997299792003, 1.19916709446462, 1.65608451652971
TUBA1C	3	2	1	C5	1.1266133972834, 1.56563582038772, 1.62061202902042
TUBA1B	19	11	8	C4	7.65785823427139, 3.51082554602768, 4.27011684605262, 7.92631473798713, 1.52814959934516, 3.45752088689054, 5.47120600899368, 3.25541986293514, 4.44119074831264, 5.44375947192549, 4.760507175647, 3.06121856960933, 5.60534605442227, 2.26419624933994, 1.26530067153763, 2.41494554122911, 4.07941038250874, 3.24256447619447, 8.60511919286069
TUBA1A	4	0	4	C4	1.16844736661805, 1.11316059926963, 1.16245791682693, 1.18324478208634
TUBA1A	7	6	1	C5	2.31397819680849, 1.1882030438498, 1.41854209478667, 1.16574469838317, 1.84152880304626, 1.38468866403034, 1.28414477606747
TUBA1A	3	2	1	C6	2.12674092762117, 1.11029994019828, 1.18902384056298
TTTY15	6	4	2	C5	1.55447996204135, 1.34727372515665, 1.28179927680644, 1.1822767460464, 1.60031665653804, 1.84897574085066
TTN	6	2	4	C5	2.47425112243825, 1.91160106599952, 1.17746097145539, 2.7642722120393, 4.40849699411678, 1.18343737836592
TTLL3	3	1	2	C5	1.40198705428078, 1.37520852673885, 1.55947090894664
TTL	5	2	3	C5	1.20161798144865, 1.22425905567685, 1.18200317731586, 1.11079179571446, 1.13777792674593
TTK	6	2	4	C4	1.27438376858613, 1.20478270924845, 1.15559656162306, 1.19598939243907, 1.21347386739411, 1.19971966226492
TTF2	5	3	2	C4	1.14598666102359, 1.4114679146142, 1.16638560914114, 1.10642001328962, 1.15871225114875
TTF2	8	5	3	C5	2.22981926566938, 1.2366427594203, 1.37668718352523, 1.17375106808904, 1.13168812927708, 1.1113734184599, 1.34684208799245, 1.2894844789637
TTF1	3	3	0	C4	1.11612881574964, 1.21187319853773, 1.14402996406065
TTF1	8	3	5	C5	3.14913566150871, 1.31348600879924, 1.16270708370758, 1.12201984623571, 1.44766245307461, 1.22138839585516, 1.66074489237432, 1.95057949667802
TTC9C	3	3	0	C5	1.34845800692991, 1.12354192967173, 1.21900106057054
TTC7A	4	1	3	C5	1.14405144418838, 1.10581903912056, 1.37613565700386, 1.60147483146909
TTC39C	3	2	1	C2	1.17918658603705, 1.10792578487345, 1.70179490812258
TTC39C	5	3	2	C5	2.91661598302086, 1.12888144269951, 1.2426030773861, 1.14035525702297, 1.15649130487173
TTC39B	7	4	3	C5	4.06207461273365, 1.22286413667468, 1.26699715482459, 1.14389083344491, 1.53445003797398, 1.12797643628174, 1.52295948868548
TTC38	5	5	0	C1	1.22329325660632, 1.237533446931, 1.13438972646609, 1.16205233251638, 1.18836567772679
TTC37	5	3	2	C5	2.94857178277606, 1.11812117778578, 1.34137263054386, 1.87480952620544, 1.64257134342057
TTC3	12	7	5	C5	3.67733660676236, 1.57596132425131, 1.32481537274529, 3.15072639832833, 1.42059263306372, 1.7084077761766, 1.28120782843722, 1.12572982500084, 1.98972718164038, 1.22122125661084, 1.52982541562006, 1.19257603471699
TTC21B	6	4	2	C5	3.48287749534716, 1.23902605083356, 1.65440799308702, 1.51721842123227, 1.17090269537485, 1.21823851063762
TTC19	10	8	2	C5	2.47253356036115, 7.00967126789454, 1.17976674394871, 1.28599598726366, 1.23942776340898, 6.45952944441189, 2.20289818266929, 1.1948867803968, 1.68107946308508, 1.41440929849713
TTC17	9	6	3	C5	5.01496620733067, 1.47012087973258, 1.6904926891842, 1.38142273695043, 1.4345635035409, 1.26025866465521, 1.85513723211157, 1.77195837120213, 2.03548699930277
TTC16	5	4	1	C5	2.05966016452642, 1.36925343237215, 1.43880706413231, 1.22836091404128, 1.73682289697439
TTC14	3	2	1	C1	1.21977576241417, 1.29307174496049, 1.30174331856662
TTC14	10	6	4	C5	5.33424475390409, 11.7718176472854, 2.22191989003245, 1.97433421584999, 2.61044836478011, 1.73068702293139, 1.13648020872124, 3.11260019015362, 1.38233036911322, 3.22019254733313
TTC13	5	2	3	C5	1.40110689135469, 1.23489400424028, 1.10877298747138, 1.47280106004718, 1.17138677063106
TSR1	4	3	1	C5	1.23352577281623, 2.41193462414804, 1.38880939100096, 1.21889904237202
TSPYL4	5	2	3	C5	1.56001244684727, 1.13786691378246, 1.10597746162976, 1.37165707946652, 1.11857673276837
TSPYL2	3	2	1	C2	2.29937538854131, 1.11385480609793, 1.15834997896008
TSPYL2	7	5	2	C5	8.71296563210352, 1.17693888477226, 1.40391453336735, 1.83855064518399, 1.48072706348429, 1.18793138189469, 1.28232967482382
TSPYL1	5	5	0	C5	2.48424114725359, 1.25133120774165, 1.13746891854368, 1.12779741416275, 1.15790326390707
TSPOAP1-AS1	3	1	2	C5	1.47318911093844, 1.15971685677177, 1.18239783113688
TSPOAP1	3	2	1	C5	1.40239037523761, 1.14864506183693, 1.66758515378299
TSPO	3	2	1	C1	1.10713113312967, 1.2444841224917, 1.13525854620026
TSPAN5	4	3	1	C5	1.26050740876696, 2.939181047163, 1.19118935895689, 1.26991941251778
TSPAN32	4	3	1	C1	1.38782455427402, 1.42464852961832, 1.10716005624936, 1.61646024186501
TSPAN32	7	4	3	C5	1.55777696675131, 1.55204179285928, 1.16279049857614, 1.16600725144083, 1.58153155996181, 1.10700192923278, 1.67421660030669
TSPAN3	5	3	2	C5	4.96185604382879, 1.11534084236846, 1.29707573691229, 1.14977601092493, 1.42831428216081
TSPAN2	5	3	2	C1	1.20698293073355, 1.21419764447467, 1.14791918137807, 1.16295012344146, 1.43077338500183
TSPAN17	5	3	2	C5	1.83188158455911, 1.30876048605908, 1.14459203692891, 1.23004853535469, 1.30329894737116
TSPAN14	13	7	6	C5	5.06737080266988, 3.17499795342034, 1.26656587587602, 1.77023219824588, 1.18695494175476, 1.72200011930891, 1.5764775764499, 1.2380479961078, 1.51430279234042, 1.10994527830667, 1.46912367426957, 1.1331770214013, 1.79960814982052
TSN	4	3	1	C5	2.06417662790312, 1.11974869247809, 1.2005253680925, 1.17747445063728
TSG101	3	2	1	C5	1.3361907649196, 1.23827471549661, 1.32956525371467
TSEN54	3	1	2	C1	1.12271739623893, 1.1233675571604, 1.20518212963077
TSEN54	7	5	2	C5	2.52835908805224, 1.17241098511426, 1.12251039678466, 2.83072036556498, 1.39551117411488, 1.18649097005195, 1.27751185714722
TSEN15	3	2	1	C4	1.24536046870362, 1.18621942924786, 1.26266607119584
TSEN15	6	4	2	C5	3.11652033863187, 1.27674693035217, 2.12467660935356, 1.43739885635527, 1.86863691836646, 1.32633315310088
TSC22D4	3	2	1	C1	1.21587585873675, 1.22651610918695, 1.20648062528764
TSC22D4	9	4	5	C5	2.60830398262432, 1.29893623665331, 1.26802924182205, 1.13458606329373, 1.14804518198739, 1.58168760036642, 1.75239348250076, 1.53741765570317, 1.86185582397184
TSC22D3	4	3	1	C1	1.40497058803333, 1.44917532796509, 1.24852281607, 1.95402165766991
TSC22D3	8	6	2	C5	9.22003678082238, 1.75652942286411, 1.49533538535486, 1.30273226902921, 1.94067148049947, 1.19022132745454, 1.14303296148946, 1.24253980933909
TSC22D3	6	4	2	C6	2.13799156583291, 1.45680844858063, 1.26956507947467, 1.41715898039595, 1.84294718209652, 1.45788869488279
TSC22D1	4	3	1	C5	3.17295854546078, 1.51781362744108, 1.29289397601396, 1.15272988136888
TSC2	6	3	3	C5	1.49132259704097, 1.48167435809534, 1.3714278494003, 1.26769081643765, 1.55053620243809, 1.73790989475461
TSC1	5	1	4	C5	1.4095338333617, 1.12378711420293, 1.28790809617207, 1.26353409945752, 1.68864116167223
TRRAP	8	6	2	C5	3.55049066044774, 1.27693375579129, 1.39576177490157, 1.18787753329986, 1.32803022013095, 1.282244115651, 1.11241767670642, 1.42130464012234
TRPV2	4	2	2	C1	1.110110153731, 1.15796591738741, 1.11523467476653, 1.19032384946666
TRPV2	8	5	3	C5	1.88717304330744, 1.27999186800939, 2.3486755801847, 1.15499398612417, 1.15444474188741, 1.60935783919949, 1.17240577401522, 1.27225918434112
TRPS1	6	5	1	C5	2.94871789594867, 2.34375971774173, 1.11315497964443, 1.24199090934616, 1.45900278970573, 1.29789663030196
TRPM7	8	4	4	C5	3.1762583197462, 1.30123352445427, 1.46475828416385, 1.16845242928675, 1.19452710829392, 1.23468401236959, 1.99195068877905, 2.06621783909427
TRPC4AP	7	4	3	C5	3.72683003732332, 1.41388472886865, 1.3434229423485, 1.48092432197445, 1.27044050810801, 1.11726145221383, 1.7484213804411
TROVE2	9	6	3	C5	5.05017583102491, 1.19368417302946, 1.88307520014096, 1.31234724243976, 1.40646199647576, 1.38995145583136, 1.31424788517603, 1.79459337540664, 1.13119811927894
TROAP	14	9	5	C4	1.16785023110426, 1.14939541742152, 1.2324001002058, 1.14383929377786, 1.13311950380219, 1.11611929000578, 1.15728842949964, 1.35814770434421, 1.13211429447604, 1.17819424370468, 1.16093001226051, 1.1725143709122, 1.21527631174998, 1.47781374709412
TRNT1	5	4	1	C5	3.51865472108825, 1.18128322812213, 1.41364370817087, 1.16459542841457, 1.51606981337373
TRNAU1AP	6	5	1	C4	1.28458686970358, 1.3949290427938, 1.11345822353674, 1.1963862445717, 1.1379983448093, 1.24441974543055
TRNAU1AP	4	2	2	C5	2.08773379023366, 1.10787524774024, 1.85942692780693, 1.36471908611028
TRMU	6	3	3	C5	2.39156775538231, 1.58172249923295, 1.21760587563817, 1.13142185065373, 1.11167547429407, 1.21556491693784
TRMT2B	3	2	1	C5	1.53613347051156, 1.61320344517063, 1.24080167046253
TRMT13	3	2	1	C5	3.42993132203063, 1.34583728836387, 1.27770563733053
TRMT112	6	5	1	C4	1.14337092442922, 1.15060772698615, 1.16491413675311, 1.27962332373637, 1.18695256502597, 1.18730210153375
TRMT112	3	3	0	C5	1.3063536222171, 1.7012800967733, 1.16815505261481
TRMT11	3	2	1	C5	1.10805432457065, 1.26840137969647, 1.34956680778405
TRIR	8	6	2	C1	1.33376232414526, 1.19141584382604, 1.11365510539461, 1.11575342198733, 1.18104739702863, 1.11109999267169, 1.11235916679356, 1.21793098374164
TRIR	5	3	2	C5	1.7093408424234, 1.66851457674857, 1.87640290115454, 1.33851930590763, 1.80223164988421
TRIP4	3	2	1	C5	2.29734848294215, 1.23441578003262, 1.19270298219264
TRIP13	6	2	4	C4	1.18958072180311, 1.24080918946482, 1.12982865489528, 1.15267790264206, 1.12118119105947, 1.26012931255545
TRIP12	9	6	3	C5	5.18109997734836, 1.17340446161225, 1.56296296900242, 1.53915152661809, 1.74952813206727, 1.35927256874381, 1.16083410857768, 2.2639429718543, 1.16276142770137
TRIP11	9	6	3	C5	2.26517850477034, 2.79723693198623, 1.24266500800241, 2.69252639856711, 1.18151395383161, 1.76433662812222, 1.79281396934844, 1.50014806444368, 1.45315428004742
TRIM8	7	5	2	C5	2.01223076661208, 1.1524030867997, 1.15110613197826, 1.22627740153274, 1.38195016601256, 1.26195550590331, 1.27177351563546
TRIM73	6	5	1	C5	4.6087844574021, 1.26125684915591, 1.47346635977399, 1.60775563484125, 1.65137383276186, 1.68941172481337
TRIM59	5	3	2	C5	4.44279194056427, 1.78633573782146, 1.21639373579568, 1.17603080009942, 1.28453673559563
TRIM56	11	6	5	C5	10.6769012204519, 6.35852707636272, 2.12231361238517, 1.62392624957282, 1.90390995224544, 1.36837257810246, 1.22773218591097, 2.60160748905299, 1.79421641110699, 2.51987952138193, 1.13289288101243
TRIM52	9	6	3	C5	4.22423561217106, 3.607416889755, 1.48883180988912, 1.25269112609671, 1.24172677988578, 1.27470421732318, 1.11163391404578, 1.54718390874901, 1.56147036513722
TRIM44	9	5	4	C5	3.10493632018227, 1.6238888213716, 1.58005208850826, 1.56859629549692, 1.14880828209238, 1.60656663039068, 1.258496523382, 2.11538813534774, 1.5542567343256
TRIM41	5	3	2	C5	1.27886969635075, 1.30240995409253, 1.550800457211, 1.28506177467616, 1.2640937123967
TRIM38	10	6	4	C5	5.10978272207505, 1.48071972706964, 1.54420767068384, 3.63295987917721, 1.39208471108959, 2.16948915946582, 1.11657466210601, 1.85752820627649, 1.68580380481346, 2.21844151333648
TRIM37	5	4	1	C5	3.23349987523371, 2.00964599965345, 1.26146266359518, 1.12061618788965, 1.2497680199083
TRIM33	10	6	4	C5	2.87059008208236, 4.85434342050612, 1.81750953775124, 1.54002078585685, 1.65376513095412, 2.1483338229542, 1.28301415979927, 2.1542942176112, 1.8173774238231, 2.09408297246622
TRIM28	9	6	3	C4	1.20489494867037, 1.27098906374882, 1.12799435264503, 1.11759187526646, 1.2993844277923, 1.12491877397567, 1.14185660091929, 1.13475304936556, 1.20893930070093
TRIM28	8	3	5	C5	1.56080275952833, 1.16932163152847, 1.22248995533508, 2.28874723213906, 1.53769779459443, 1.33542770470488, 1.13010006389561, 1.18589874682762
TRIM27	3	2	1	C5	1.23112670053709, 1.24335636160404, 1.13138788671682
TRIM26	7	5	2	C5	1.51179878228993, 1.32539522893939, 2.10090886820365, 1.28467300361888, 1.19142603313576, 1.33671120367537, 1.65736998413417
TRIM25	7	5	2	C5	2.66848724905143, 1.16338226364515, 2.84915116985898, 1.19597468607651, 1.11610503045696, 1.10891501286538, 1.23799461385945
TRIM24	4	2	2	C5	1.37660784802955, 1.13768137193837, 1.48173502806207, 1.24888506756036
TRIM22	4	3	1	C1	1.70536319394664, 1.14434657563788, 1.34910642930401, 1.16290721963306
TRIM22	11	6	5	C5	11.4212885231048, 1.94158992298027, 1.72794118343205, 1.71821539780944, 2.31366882720446, 1.40424654458212, 1.9357211373777, 1.45107442185802, 2.5930786555408, 1.12227507177421, 2.3063602996087
TRIM14	7	4	3	C5	1.68534700841363, 1.19816309836796, 1.29333585182663, 1.37464007486727, 1.32267866674421, 1.20219764346566, 1.39194636241393
TRIM13	6	4	2	C5	3.06062561807744, 1.30834990243962, 1.36670846951763, 1.31915435373796, 1.30802988380374, 1.36097748412084
TRIM11	7	4	3	C5	3.15390602877269, 1.19969241677033, 1.16530092891984, 1.26349773802123, 1.19325196831593, 1.14331036390609, 1.42723740662344
TRIB2	7	4	3	C5	1.78727756948366, 1.15750275427078, 1.24233154908911, 1.50972274139895, 1.1102840873325, 1.30349445547708, 1.43922660002129
TRIAP1	3	3	0	C1	1.1536886197217, 1.23352316497766, 1.14546508225274
TRGV9	3	3	0	C1	1.40208658117322, 1.11945111623247, 1.11227949357275
TRGC2	12	8	4	C1	2.22291045572132, 1.22504089297311, 1.40861343794787, 1.31787444093498, 1.25249095246187, 1.48468055001674, 1.21878361905597, 1.23290089035587, 1.36939275702299, 1.37353433416281, 1.22318262211751, 1.71877265772023
TRGC2	4	4	0	C5	2.11880620034762, 1.50430940575449, 1.38201754334709, 1.13547325678936
TRGC1	4	2	2	C1	1.23230749345365, 1.17331076179927, 1.20940558905909, 1.31138833019392
TRG-AS1	7	4	3	C1	1.35083600786679, 1.18555963902668, 1.13995526089471, 1.15571366302292, 1.1464671761089, 1.16824968733693, 1.44377981608336
TRG-AS1	7	4	3	C5	2.82533144409747, 1.12434717056175, 2.17950185650951, 1.53632699907002, 1.12709775646106, 1.28014963864302, 1.20527002802143
TRERF1	5	4	1	C5	1.31723364022246, 1.27273312260456, 1.21800786116595, 1.34983275157997, 1.50351877597274
TRBC2	9	7	2	C1	1.47433304189969, 1.12570248362991, 1.43718564471613, 1.2828541243887, 1.18738320092732, 1.12160684805718, 1.20521795831924, 1.21587848621519, 1.22380456894056
TRBC2	6	2	4	C2	1.29538818612648, 1.16413630773838, 1.28335786312007, 1.14253394388318, 1.17659772243451, 1.1555022548676
TRBC2	3	1	2	C5	2.35172078765737, 1.35856186919403, 1.25791943340175
TRBC1	5	4	1	C1	1.29948881679991, 1.17616275641961, 1.29108108699558, 1.4324739912872, 1.28700130230983
TRBC1	4	2	2	C3	1.21101584018625, 1.15134113176728, 1.18159085356346, 1.13371614200955
TRBC1	3	2	1	C5	3.16638710292498, 1.13530542115547, 1.47869787967685
TRAT1	8	6	2	C5	4.2822953517435, 1.22565824413817, 1.13691605990636, 2.51771601892176, 1.16947579524863, 1.14346920759481, 1.34188272222809, 1.40765333707756
TRAPPC8	3	2	1	C5	1.2121671991211, 1.17816356192921, 1.41559529931854
TRAPPC6B	7	5	2	C5	3.92435676044726, 1.70851506948729, 1.16021386201705, 1.13908538023275, 1.60746021867209, 1.1362947398857, 1.31083147574909
TRAPPC4	3	2	1	C4	1.10981716576154, 1.14256629868805, 1.13630227520562
TRAPPC4	4	4	0	C5	2.48752290122104, 1.23398049560293, 1.65553507657116, 1.57005716090475
TRAPPC3	3	3	0	C4	1.13339135353044, 1.11188519465388, 1.11204922519815
TRAPPC2L	4	3	1	C4	1.27505860539223, 1.31958619328045, 1.15565368897572, 1.11420803016058
TRAPPC2	3	1	2	C1	1.13586696640255, 1.122116901197, 1.31105129533546
TRAPPC2	8	6	2	C5	5.20141094353311, 1.36145563893504, 1.20340791376623, 1.26880900671292, 1.4960269719945, 1.15937107474011, 1.25523037300091, 1.63368208128083
TRAPPC12	4	2	2	C5	1.12750461918929, 1.12053718856832, 1.16752848020777, 1.16025448378235
TRAPPC10	7	5	2	C5	5.38621474622214, 1.38763144842552, 1.4514907359283, 1.47501292714089, 1.64867844792946, 1.6281335225393, 2.0046059508238
TRAPPC1	7	7	0	C4	1.10876385276315, 1.11430200546556, 1.11113131707154, 1.20646278789072, 1.13683517051295, 1.28294859546814, 1.11989763219209
TRANK1	8	5	3	C5	2.9364074089038, 1.39923330715044, 1.30225999890744, 1.71801439844146, 1.17844360590053, 1.3630879809971, 1.11992371362873, 1.52984603444924
TRAM1	4	3	1	C5	2.76119712558472, 1.2306568064214, 2.28862733908663, 1.29686396332864
TRAK2	3	1	2	C5	1.33397567565789, 1.11925097971373, 1.10919757898347
TRAIP	3	2	1	C4	1.11326152180599, 1.13130485634161, 1.13079844116779
TRAFD1	5	3	2	C5	2.09727243253886, 1.15997267395913, 1.12915074883222, 1.22083765880076, 1.34355667650737
TRAF6	3	2	1	C5	2.95937195242597, 1.47679673692922, 1.27783603067758
TRAF5	9	5	4	C5	3.30091338019427, 1.34525315280342, 1.40293613492413, 1.10604534869211, 1.28777435741579, 1.11411379236036, 1.2221061548835, 1.3960948806479, 2.08946868001998
TRAF3IP3	4	1	3	C1	1.10977148541368, 1.16160931087823, 1.22063427750184, 1.12522935133824
TRAF3IP3	3	1	2	C3	1.23545998129258, 1.11132637659138, 1.14012909899131
TRAF3IP3	13	8	5	C5	1.51781764733693, 6.87177825234616, 1.58485335299793, 1.46117358976061, 1.37588641818161, 4.46616856491563, 1.31118856555578, 1.61908116871125, 1.15434361721415, 1.23210973211076, 1.56662772193204, 1.40744214202048, 1.14315387748552
TRAF3	6	2	4	C5	1.63263361087106, 1.15601668375919, 1.10605771335905, 1.1298906755987, 1.36419601352484, 1.24162587661743
TRAF1	6	3	3	C5	4.20204728318004, 1.25258966548039, 1.70767853018093, 1.24622481332494, 1.57016134264995, 1.36281578460121
TRAC	9	4	5	C1	1.1592003745669, 1.49423678141439, 1.33890726459668, 1.14436908183301, 1.226234863055, 1.26573873990491, 1.27771193083222, 1.28113894824491, 1.27522329910546
TRABD	7	4	3	C5	4.24128266477706, 1.9005402430057, 1.34260748894362, 1.40055843891056, 2.46838202293765, 1.60983954871458, 1.96922328109227
TRA2B	5	3	2	C4	1.58781578088772, 1.10947608968884, 1.35885660120451, 1.12183646456771, 1.19902929347686
TRA2B	9	7	2	C5	2.51927920782014, 10.048645786935, 1.44069291731278, 1.87695775421354, 2.02227112956853, 1.78133299075009, 1.363776100375, 2.19439050244468, 2.90991249546047
TRA2A	12	8	4	C5	2.32666533818194, 11.1699959450651, 1.5641364867501, 1.39835040979912, 1.93971220450725, 1.63681232087055, 2.54289196410012, 1.54007153146378, 1.70858169111836, 1.48278235794864, 2.63573661672439, 1.80624763833672
TPX2	17	10	7	C4	1.81364061919381, 1.43027665545078, 1.13135826078572, 1.61351715820325, 1.36611964696739, 1.47064761407341, 1.24693463911766, 1.27467257024989, 1.35244896471504, 1.49531144626636, 1.74746255109356, 1.36435145657369, 1.1554110557811, 1.67931856646383, 1.31775869604926, 1.8302081754673, 2.53560707315697
TPT1	4	3	1	C1	1.37539849682079, 1.11481487169176, 1.36174265641362, 1.19612603531339
TPT1	3	2	1	C2	1.15780110240214, 1.19191828254759, 1.199394293206
TPT1	5	4	1	C6	2.63898996664885, 2.26135401425313, 1.5930921018283, 1.79508351698678, 1.62362940575137
TPST2	8	5	3	C1	1.31197001155339, 1.14868020850564, 1.19772148783882, 1.136002026491, 1.11387063050529, 1.17943000834908, 1.23796305994701, 1.70616182701119
TPST2	7	5	2	C5	2.29927804330233, 1.47655526461495, 1.11829455739966, 1.34088695600965, 1.28530170189293, 1.20217120294845, 1.42873765817131
TPRKB	14	9	5	C4	1.35647052268507, 1.22403186288658, 1.1591170316113, 1.38753767947813, 1.11309915801947, 1.19186938643671, 1.18099225454115, 1.24703901069772, 1.22136914974162, 1.127671416949, 1.17529824940442, 1.17512331642377, 1.12382253106283, 1.41441437826402
TPRG1L	3	1	2	C5	1.12193723680305, 1.16248901765928, 1.12196072357081
TPR	6	4	2	C4	1.344018920007, 1.31266093947704, 1.16518124560199, 1.18510547197708, 1.12775677905251, 1.15039790175802
TPR	12	8	4	C5	1.10613468097791, 8.45838284339363, 1.43212487364402, 1.81814544108074, 1.72690310458849, 1.87195989345524, 1.55320451810469, 1.64492177794945, 2.29530245063225, 1.28154545871969, 2.25917157640133, 1.14613457726946
TPP2	11	7	4	C5	2.38645441868207, 5.40162008959681, 1.42343450523811, 2.21308389252197, 1.54916981569519, 1.47248116597925, 1.35102773876702, 1.17500469723462, 1.62609907040541, 1.42456115295182, 2.07646064371884
TPP1	6	4	2	C5	2.16030107063015, 1.23652808975062, 1.37005808547789, 1.43737589022399, 1.12497577655467, 1.13727774710113
TPM4	12	9	3	C4	2.05924330650077, 1.22250966785129, 1.49993893663167, 1.46222961012026, 1.73746507596069, 1.23904499560901, 1.5816264779051, 1.36240838194882, 1.78845097590587, 1.18957026883913, 1.22611271989891, 1.49579364074038
TPM4	6	3	3	C5	3.8323605486089, 1.15810712683632, 1.16365396089741, 1.10990035188317, 1.37537877538537, 1.60928854703841
TPM3	12	9	3	C4	1.47846741160792, 1.18365975226446, 1.36950740808525, 1.18714355979513, 1.38266523037056, 1.18478326059661, 1.50499512839676, 1.34015381134768, 1.285149625599, 1.17818599879165, 1.16694398744885, 1.17666917946844
TPM3	5	3	2	C5	2.83323476141334, 1.20380558767786, 1.10815071153542, 1.1311790378486, 1.14535559106603
TPI1	17	10	7	C4	2.12162773041915, 1.29321580158804, 1.29864572358592, 2.22952688937022, 1.33524817583361, 2.01176099017358, 1.520569919861, 1.77696018410393, 1.458967820722, 1.60987345962696, 1.1911289582109, 1.80268959827788, 1.23884348517044, 1.27047005352292, 1.75122553577202, 1.22360013008602, 1.74359683227637
TPGS2	8	6	2	C4	1.17761741190102, 1.36627595206592, 1.12497181694936, 1.18763088005972, 1.1645590547862, 1.12735147169684, 1.15282538896795, 1.40854221543355
TPGS2	3	3	0	C5	2.63865124024564, 1.31604082511048, 1.19615465005268
TPGS1	5	3	2	C5	1.12110716273874, 1.12651064365439, 1.11253842384701, 1.49368578646413, 1.20451047856405
TPD52L2	3	2	1	C5	1.40997500440867, 2.94828890600221, 1.10566619944242
TP53RK	4	3	1	C5	1.25455067686312, 1.14970124364216, 1.12120183307183, 1.1067445932624
TP53INP1	6	5	1	C5	4.62831193860654, 4.57930376595557, 1.14207038860979, 1.52737373161989, 1.50843795755759, 2.34576257266269
TP53I13	4	2	2	C5	1.41009746060133, 1.15306275640344, 1.53428795230892, 1.13531474451162
TP53BP2	6	5	1	C5	2.77693399083906, 1.36584387714821, 1.14217961350503, 2.6721166282633, 1.33553412684884, 1.4065729894229
TP53BP1	4	3	1	C5	1.13551734241731, 1.27012476827082, 1.33116316159477, 1.24435329524973
TP53	4	3	1	C4	1.1174298265952, 1.19353708937937, 1.14094782333208, 1.24591781987242
TP53	4	1	3	C5	1.19243516237361, 1.19668742295642, 1.14080146512884, 1.22136971427862
TOX4	4	2	2	C1	1.1959547840194, 1.17619172467124, 1.13605904010024, 1.1618671052046
TOX4	6	4	2	C5	5.60066739897522, 1.25103847394738, 1.63288776176806, 1.19337632781922, 1.20025971667696, 1.58223743065058
TOX	3	1	2	C5	2.50510741466326, 1.29605970790697, 1.14702343345095
TOR3A	3	2	1	C5	1.27100240934199, 1.22672545882254, 1.16046449618688
TOR1AIP2	8	5	3	C5	3.02661075374497, 1.25928123107249, 1.52816204161449, 1.28581179081226, 1.28661279581982, 1.44027781154554, 1.14836237594017, 1.81510003423169
TOR1AIP1	6	5	1	C5	3.77974453460675, 1.4180958863925, 1.29864180679288, 2.74817194932026, 1.42565476520655, 1.76761266324511
TOR1A	3	3	0	C5	1.22931577647904, 1.13806653910529, 1.17580528689065
TOPORS	7	5	2	C5	3.3691500194838, 1.2549989303993, 1.28770233437996, 1.39162555074446, 1.26781520640225, 1.18152147546825, 1.51721421780052
TOPBP1	13	8	5	C4	1.36993358353965, 1.43880240133545, 1.15888364079602, 1.17674167573028, 1.13566658602965, 1.11282972123192, 1.17470952256562, 1.20916087867047, 1.17293291064684, 1.16049034071792, 1.1243674506838, 1.1920226542403, 1.57598317817773
TOPBP1	7	5	2	C5	2.31657114784491, 1.89258271060343, 1.17202874200089, 4.43831534216346, 1.36633325661267, 1.37618539770901, 1.36439596687791
TOP2B	8	5	3	C5	1.93390092731282, 1.62651605048883, 1.43127623209782, 1.34889148647972, 1.29760383276971, 1.28165676392318, 1.44269983992729, 1.7197134497505
TOP2A	17	10	7	C4	1.84141136184043, 1.42043697182597, 1.33394721613367, 2.58316567974409, 1.83800115434485, 1.83433339868247, 1.58441016389531, 1.90451636397536, 2.13438744043183, 1.72451997524178, 2.49832060987178, 1.83022452785034, 2.08854707748816, 1.96798523465922, 1.45313938732468, 2.40433922427389, 3.80255837564552
TOP1	3	2	1	C4	1.18654755517727, 1.10996849839044, 1.20617714714535
TOP1	7	5	2	C5	4.85613075968995, 1.55673641009425, 1.27070211595508, 1.48886322924972, 1.42621463083099, 1.6579343713746, 1.67067422675345
TOMM70	3	2	1	C5	1.70610874517369, 1.14647066459596, 1.30737221901257
TOMM7	5	4	1	C5	1.22561645660141, 2.12022357274781, 1.52488558700568, 1.11256498700227, 1.10938485194611
TOMM7	3	2	1	C6	2.22705420021622, 1.42952793526654, 1.15301628947328
TOMM5	4	2	2	C4	1.20131588562947, 1.36231238210546, 1.1121607275774, 1.12050336988989
TOMM40	11	8	3	C4	1.52273053518775, 1.22053839819609, 1.28960807152027, 1.10624945939007, 1.11091241364104, 1.1074367537434, 1.16875964933697, 1.1875536632218, 1.10784279954595, 1.16892929642188, 1.23008422361386
TOMM40	6	4	2	C5	1.84180760052265, 1.18947414977312, 1.11576009117008, 1.12796118376015, 2.05849967676446, 1.12263168871288
TOMM22	8	8	0	C4	1.46809134691204, 1.12088528911929, 1.15500404526782, 1.14061806767231, 1.12252918165043, 1.23651905600489, 1.13138328812503, 1.20471721979066
TOMM20	3	2	1	C6	1.7634160003186, 1.36298950477129, 1.12019938911842
TOLLIP	3	2	1	C5	1.1129301728235, 1.28599754820048, 1.1481015542367
TOGARAM1	4	1	3	C5	1.20856075170929, 1.11604823902244, 1.64569916598914, 1.29631561627497
TOE1	3	2	1	C5	1.21509257164552, 1.12601571029729, 1.18129585721642
TOB1	6	5	1	C5	2.0314102148037, 1.49149408759257, 1.14970841060672, 1.45774638380605, 1.33552778143846, 1.22650220897169
TOB1	3	2	1	C6	1.82667288922342, 1.51449143466823, 1.38557533231119
TNRC6C	4	2	2	C5	1.13897057528683, 1.10618227762694, 1.12279620532972, 1.46891680807606
TNRC6B	4	3	1	C1	1.146817732664, 1.24353163356738, 1.16841020541071, 1.36067221512578
TNRC6B	11	6	5	C5	7.94994196413172, 2.11831522704213, 2.6088886288597, 2.03672765032236, 2.04574588602551, 1.59731985641152, 1.21064587900573, 1.82508867594999, 1.468127380375, 2.88843195290033, 1.13186317416359
TNRC6A	7	5	2	C5	3.22360204881403, 1.61139390717155, 1.3274379212784, 1.36474572320786, 1.35928603189639, 1.22414875325399, 1.98058158520976
TNRC18	3	1	2	C5	1.13774057351925, 1.11695653129662, 1.14711706967706
TNPO3	3	2	1	C5	1.98831092275841, 1.11836942233754, 1.43630543896234
TNPO1	9	4	5	C5	2.90457736188593, 2.97794130103451, 1.29870810310169, 1.41660811929005, 1.72269534939708, 1.84641006558857, 1.27315357033556, 1.86004414119144, 2.15458525046192
TNKS2	6	4	2	C5	4.31451737254584, 1.55327890153934, 1.36355497352558, 1.30526249362681, 1.73099741940043, 1.91866075041516
TNKS	7	6	1	C5	3.33922198375347, 1.33381649410386, 1.14932091419695, 4.78382884691668, 1.38850409357526, 1.25514312331703, 1.40342710512044
TNIP2	7	5	2	C5	2.43995436350219, 1.59797385121509, 1.34474366320776, 1.14033505124334, 1.1365622231156, 1.52901638729971, 1.23943881819904
TNIP1	6	4	2	C5	1.5138187743723, 1.26890803306285, 1.11052373217058, 1.11928740265514, 1.57731713260717, 1.50884154732122
TNIK	9	6	3	C5	2.43147884750858, 4.69324247425184, 1.49671252413237, 1.35064373613916, 1.4403255619817, 1.15572403366957, 1.15248608969805, 1.14874324384002, 1.76767603931577
TNFSF10	6	5	1	C5	2.11536911229263, 1.3965564272353, 2.21036152116225, 1.14360164201017, 1.54458877026912, 1.12832919788116
TNFRSF25	4	1	3	C5	1.36542937536563, 1.70151360220551, 1.32752127835016, 1.37060536315475
TNFRSF1B	9	6	3	C5	2.71313070761591, 2.12440888717673, 1.52602134220123, 1.19790167822288, 1.5958294656204, 1.20143679954414, 1.5884647948606, 1.18461766959038, 1.31387053159952
TNFRSF14	4	3	1	C1	1.36703848699226, 1.47809019375009, 1.12704364539195, 1.12057145249776
TNFRSF14	5	3	2	C5	2.98662546392675, 1.13926891125619, 1.26622301318854, 1.44023020645195, 1.5111261937955
TNFAIP8L1	3	0	3	C5	1.42658843998928, 1.22806102642769, 1.25742609562621
TNFAIP8	5	4	1	C5	1.82390889785229, 2.23078712155911, 1.14677979563026, 1.20655960994472, 1.15472550116172
TNFAIP3	5	3	2	C2	1.11745062451583, 1.17061783099504, 1.13009022975734, 1.10868421210593, 1.96788842643816
TNFAIP3	12	8	4	C5	8.30071197492442, 1.79389337068927, 1.48957334158782, 4.48073299838991, 1.58976849179482, 2.65948638972386, 1.77979499399321, 1.52074273668786, 1.14143273626859, 1.91397681448273, 1.80992635372714, 2.37201304755664
TMX4	3	2	1	C1	1.26618388054946, 1.26595144238913, 1.24128203838414
TMX4	3	1	2	C4	1.10801769791367, 1.16258248018913, 1.13868939163426
TMX4	7	6	1	C5	1.64622635894375, 1.82348190438802, 1.28200301921048, 1.16934900027282, 1.2687703366457, 1.32652580423671, 1.35586638841221
TMX3	6	4	2	C5	3.57365405052838, 1.12995942261652, 1.22690825105638, 1.29639201428573, 1.30284182245944, 1.58455497192607
TMX2	3	2	1	C5	2.09392254353227, 2.86865846389202, 1.15440612512701
TMX1	5	4	1	C4	1.47423891288851, 1.34505510868413, 1.2105088242974, 1.12435454121881, 1.1433737304671
TMX1	4	3	1	C5	1.71538807556188, 1.10667809402425, 1.27484033329257, 1.16675776138919
TMUB2	6	5	1	C5	3.63945954176213, 1.22380921261259, 1.16588972590929, 1.26950291457357, 1.11943421489438, 1.41155458016342
TMUB1	5	2	3	C5	1.33669434131607, 1.21257394296975, 1.11706874001198, 1.58708554917073, 1.38850528259012
TMSB4X	4	2	2	C1	1.11975915266571, 1.4010022094915, 1.12204126232319, 1.15341540920501
TMSB4X	6	6	0	C4	1.42596511544698, 1.27236186167797, 1.47877545606318, 1.52812752509794, 1.22991760208539, 1.10661705388848
TMSB10	4	4	0	C1	1.16710057168142, 1.11543469049677, 1.24203345387988, 1.3975053037058
TMSB10	5	4	1	C4	1.43257895700494, 1.21821482510743, 1.31793190964031, 1.14252692292063, 1.14061738895402
TMPO	17	10	7	C4	2.13701227856646, 1.58568282982221, 1.15572537197439, 2.3920056593315, 1.57067367081233, 2.12171483752894, 1.65201995824047, 2.02341090298615, 1.49927949045319, 1.63620701299355, 1.42414434668278, 1.31421764317479, 1.20926379181774, 1.29292036086454, 1.50698891260721, 1.32324403343561, 2.99245286582743
TMPO	10	6	4	C5	1.26043953399102, 3.11773479844374, 1.29764604998365, 1.34526379955932, 1.31141287050607, 1.47114682903325, 2.52363927734949, 1.3960565385541, 1.40385728108734, 1.47609276358593
TMOD3	6	4	2	C5	2.64245465060917, 1.31488162776606, 1.22382644029865, 1.33399732870258, 1.54592180227555, 1.63662369316534
TMF1	8	5	3	C5	7.88241160567836, 1.20123513622977, 1.60673009369212, 1.43382779130828, 1.1508543778778, 1.45416749051313, 1.10660118439551, 2.42016446956791
TMEM9B	3	3	0	C5	1.77547963440317, 1.26245704295818, 1.22962940009886
TMEM97	4	0	4	C4	1.1092952960868, 1.12637107710826, 1.12048933519691, 1.11523445848533
TMEM8A	3	1	2	C5	1.41161168141693, 1.22376346759135, 1.10640893014469
TMEM87B	5	4	1	C5	1.31024488529304, 4.03782242349923, 1.21279922686768, 1.33423441306301, 1.31714371934597
TMEM87A	8	6	2	C5	4.8565239883792, 6.28500442927386, 1.51395061708946, 1.49353490956453, 1.32094603446341, 1.38083057854789, 1.13041702889357, 1.99853267573813
TMEM80	4	2	2	C5	1.24599832919553, 1.21267362934015, 1.27465335976945, 1.10572256964558
TMEM59	7	4	3	C1	1.30822844050185, 1.19423324476717, 1.1795927581061, 1.11261419971518, 1.10845720581999, 1.13057682845006, 1.23122723421714
TMEM59	4	3	1	C5	1.97683923631501, 2.1051860141535, 1.21220396149562, 1.11239740262851
TMEM50B	9	7	2	C5	2.76763607738065, 3.30091487705222, 1.15805819870852, 1.53635648440141, 1.13314670667224, 3.08889294614413, 1.1835147370633, 1.34330348792631, 1.23820561132279
TMEM50A	3	3	0	C5	1.58920623234268, 4.87738960331868, 1.13888386835658
TMEM43	4	2	2	C5	1.18678091910556, 1.40689285103912, 1.20433948520521, 1.16005850399745
TMEM41B	10	7	3	C5	4.79988480050992, 1.54535615000209, 1.4022887821346, 1.19557987676066, 4.24572487509461, 1.45717537764817, 1.53561997828725, 1.18005227460732, 1.29664862730336, 1.57697976501349
TMEM41A	5	4	1	C5	2.77033375435044, 1.33163320403845, 1.31336944018439, 1.18241691483238, 1.49932162324028
TMEM39A	3	2	1	C5	1.17870594112245, 1.42492276601996, 1.21572609802535
TMEM33	6	4	2	C5	5.84815911754433, 1.12265592347743, 1.22794080139757, 1.31645715428404, 1.44577921744151, 1.62278893856099
TMEM30A	4	3	1	C1	1.21565953392143, 1.18531475710927, 1.10901726308202, 1.11714924732685
TMEM30A	8	7	1	C5	3.77002127246785, 1.4154205714954, 2.12587342596809, 1.24114425067344, 2.82372822257447, 1.52364150319302, 1.13468458427006, 1.39842607262914
TMEM263	3	2	1	C5	3.02608763459879, 1.26542969043489, 1.15222852672616
TMEM259	9	6	3	C5	5.6791414821888, 1.61883687177747, 1.38529304373773, 2.44620067056363, 1.78577455762878, 1.4109940790883, 1.79687818470215, 1.85384401515856, 2.23937618773833
TMEM258	9	7	2	C4	1.39631950071637, 1.12677448720439, 1.13912186314959, 1.17493631231686, 1.24836171679144, 1.16626801986627, 1.20872724314671, 1.13223654081908, 1.14634526806091
TMEM248	5	3	2	C5	1.62941731866279, 1.11486077910866, 1.27145230740458, 1.19624569784849, 1.23763600030605
TMEM245	4	2	2	C5	1.39052249139731, 1.31182243870717, 1.11693107577969, 1.36919265140768
TMEM243	8	6	2	C5	3.33585435923722, 1.11230739150942, 1.73659793938702, 1.12902994184019, 2.37198704031019, 1.22003581899501, 1.29173642236131, 1.23484588045921
TMEM242	5	4	1	C5	2.90319719147294, 1.70669923574945, 1.13288895676218, 1.21755892866601, 1.13303629984305
TMEM238	3	3	0	C4	1.3424549784339, 1.16969899093005, 1.16740231640104
TMEM230	3	2	1	C1	1.17890686110456, 1.12542486885543, 1.10557547372237
TMEM222	3	2	1	C5	1.1251075951798, 1.20444230050171, 1.17672912481464
TMEM219	3	1	2	C2	1.18249363906885, 1.13281929309095, 1.10960341646322
TMEM209	4	3	1	C5	2.07092032964404, 1.25955163960849, 1.19525745688689, 1.31545266785582
TMEM208	3	2	1	C4	1.14735280637724, 1.37006189177741, 1.1130498321577
TMEM208	5	5	0	C5	1.95446874907605, 2.07928329578704, 2.51792488975492, 1.1843516412651, 1.11890824319202
TMEM199	3	3	0	C5	1.42430781808246, 1.60744606307031, 1.12643804896397
TMEM185A	3	1	2	C5	1.22094422428287, 1.16293960929611, 1.13254596143857
TMEM183A	6	3	3	C5	4.31480114847724, 1.19082487059588, 1.30354182525097, 1.11764758434051, 1.27883033589928, 1.29195702103742
TMEM181	10	6	4	C5	4.24318154494962, 1.20112041510762, 1.33680443373508, 1.32782571663811, 1.64284410347525, 1.47258199164234, 1.20319275087196, 1.320255041756, 1.32362586084301, 1.84776654039006
TMEM18	8	4	4	C4	1.26424462933638, 1.15779102774566, 1.1745134367476, 1.15059692137084, 1.19839959202582, 1.16359152926416, 1.21512630583334, 1.20699627276072
TMEM173	4	3	1	C1	1.1906421513905, 1.12084166357962, 1.13910199282666, 1.29003374971333
TMEM173	3	1	2	C5	1.55625444463879, 1.51431637819657, 1.3479329728022
TMEM170A	5	4	1	C5	3.46940139247016, 1.18664300931384, 1.2401872405713, 1.17605128702301, 1.56429138786735
TMEM168	5	3	2	C5	2.47109143901937, 1.50069565432774, 1.21798260281914, 1.34145711218684, 1.51058186184643
TMEM167B	6	5	1	C5	2.83393299852697, 2.51922755493007, 1.58388845643689, 1.1564580409938, 1.20884176747421, 1.26742614845723
TMEM167A	7	6	1	C4	1.19736445972736, 1.17634950917106, 1.23432998358449, 1.18862864596549, 1.15424920024116, 1.12648191391727, 1.26776381719041
TMEM167A	5	4	1	C5	3.170798432139, 1.18058290024439, 1.28449934306231, 1.3328492942128, 1.24303185284266
TMEM165	9	5	4	C5	4.41810556800558, 1.40132746241325, 1.91089994085575, 1.36798257698932, 1.48029317480581, 1.11430593446599, 1.18330282539117, 1.21678213815704, 1.43511067148748
TMEM161B-AS1	4	2	2	C5	1.73149812228081, 1.18195825086047, 1.2975602468094, 1.13184466865864
TMEM161B	7	4	3	C5	3.56131145587316, 1.29750733231765, 1.29467373944826, 1.19334617698515, 1.18922543866143, 1.51597735476954, 1.40646034425959
TMEM160	7	5	2	C4	1.25252493974361, 1.25985976740357, 1.32910695405686, 1.13723505549344, 1.38047086430419, 1.16018703160615, 1.22039588898537
TMEM160	5	3	2	C5	1.13122559946336, 1.61847516488156, 1.16929688704102, 1.24432850818738, 1.46169984376127
TMEM156	4	2	2	C5	1.72125849369455, 1.18232082488501, 1.23892643607495, 1.12719243201136
TMEM154	5	2	3	C5	1.35874756748848, 1.31835821569267, 1.29908745018881, 1.17788125440475, 1.24811940568274
TMEM14B	3	3	0	C4	1.1735052747741, 1.12572262975792, 1.12871405793469
TMEM14A	4	2	2	C4	1.30241484946391, 1.10827115425807, 1.1332039662389, 1.15734251743455
TMEM138	8	5	3	C5	2.58119620745639, 1.47385240821622, 1.21422749591033, 1.35222792283655, 1.31420857166016, 1.30161865337518, 1.18144355961147, 1.55900496885187
TMEM131L	7	5	2	C5	2.50023392803533, 1.68451444711738, 1.43944568089236, 1.33623412131184, 1.16342298007224, 1.11635604640938, 1.58921467134524
TMEM131	4	3	1	C5	2.73470105321884, 1.16592016238997, 1.42240947549028, 1.49200074338242
TMEM126A	7	7	0	C4	1.29887100631655, 1.11445755637577, 1.11748846991968, 1.21043282021284, 1.13018733128408, 1.14121996957351, 1.15290544268313
TMEM123	7	6	1	C5	2.05432192269215, 1.24740111782353, 1.16307620044225, 1.24125032222366, 1.66985155792126, 1.11515436295043, 1.31215971042391
TMEM123	3	2	1	C6	1.4631828047584, 1.4848908487471, 1.1414585748065
TMEM120B	3	2	1	C5	2.21800334393234, 1.10784760765537, 1.12606137797481
TMEM11	3	2	1	C5	1.39969555052946, 1.24399367274118, 1.64813350330287
TMEM109	6	5	1	C4	1.32437351026525, 1.42842330180808, 1.14236253714764, 1.14126118948941, 1.15158764813528, 1.20470330962752
TMEM109	4	2	2	C5	1.11304435630091, 1.17196416137489, 1.16317829185427, 1.2214099057385
TMEM106C	16	10	6	C4	1.49116917737453, 1.29518265370051, 1.18077403062735, 1.8828110275506, 1.22540053739161, 1.50394382504603, 1.18661263820899, 1.39592127825837, 1.29690474733693, 1.38732958714759, 1.20811973529946, 1.40306423982899, 1.1808139617723, 1.25479111368381, 1.2067103629189, 1.98757331772143
TMEM106B	5	4	1	C5	3.18009312624961, 1.91125052621925, 1.35369868241221, 1.13925008368665, 1.20362620306638
TMEM101	3	1	2	C5	1.13362779375797, 1.29219672684064, 1.33147408664953
TMED9	4	4	0	C5	1.14975058637644, 1.22390167324314, 2.0908988010126, 1.10968378472901
TMED7	4	3	1	C5	1.19847517606678, 1.13280302648703, 1.2131579205013, 1.16642556137072
TMED5	7	6	1	C5	2.69882797538808, 1.28628785357132, 1.20702999491124, 2.71008175458962, 1.4548102273133, 1.21725142669079, 1.39550619964925
TMED4	9	7	2	C5	2.33772590871172, 4.39167370996199, 1.49731890669864, 1.13523594780925, 1.25538345555075, 1.4624048643235, 1.14658553480366, 1.37785419600986, 1.30452463194402
TMED3	5	2	3	C5	1.36497093513844, 1.64232505881877, 1.20209082625995, 1.25365488769861, 1.14856717196204
TMED2	3	2	1	C5	1.14069422105361, 1.17971081856278, 1.11437660794586
TMED10	7	5	2	C5	1.24756398824584, 1.33591505319753, 1.17702933978685, 1.15241863586302, 1.15202385648682, 1.46337542604499, 1.10653023905149
TMCO1	5	4	1	C4	1.12527203712055, 1.11608429324385, 1.11252918786149, 1.25874588814711, 1.2579398864019
TMCO1	6	4	2	C5	1.91721356937971, 1.16892111313803, 3.23647954857386, 1.13726329417161, 1.22901453159637, 1.29601072098126
TMC8	11	5	6	C5	1.9108546581631, 1.11847883928279, 1.55428821357975, 1.50647718411402, 1.28409149928598, 1.19358605166047, 1.19278294727455, 1.37684975187716, 2.44681776943208, 2.58423019227247, 1.14717479253817
TMC6	11	7	4	C5	2.1695171688735, 5.09071260186121, 1.67457617555528, 2.02849888361343, 1.50381948867409, 1.46714762092979, 1.36704297838539, 1.13547246132354, 1.20551359143961, 1.23873132242546, 2.00960808724908
TMBIM6	10	6	4	C4	1.26489954913242, 1.18578496670846, 1.40370115241289, 1.13348869600362, 1.491990082117, 1.17105398938332, 1.17389217259133, 1.14460217231865, 1.13594436707498, 1.25823990324964
TMBIM6	8	6	2	C5	1.50830897050944, 1.58865369274442, 1.54721442347732, 1.20786361129123, 1.54372336609503, 1.16008049053405, 1.15109822466709, 1.13646310713766
TMBIM4	8	5	3	C5	1.94360443665903, 3.39758395790826, 1.22689695601098, 1.48286808836573, 1.51164655472472, 1.44605467168603, 1.25227583288096, 1.4468609023393
TMA7	3	2	1	C4	1.12855727325923, 1.10585317957065, 1.16353482071242
TMA16	3	2	1	C5	1.1121104322176, 1.15361662188185, 1.18456662996982
TM9SF4	3	1	2	C5	1.22371732106037, 1.22435620154295, 1.19704419852773
TM9SF3	8	4	4	C5	2.29356897400833, 6.29374277162095, 1.47443128661618, 1.89595500135962, 1.23456999000494, 2.18282177581071, 1.10807087658666, 1.79373579589034
TM9SF2	8	5	3	C5	3.10425233532909, 2.52929370095625, 1.20322000449582, 1.438510794593, 1.18282006198235, 1.29227411687669, 1.13700755621616, 1.29527204326717
TM7SF3	5	2	3	C5	1.2701145308623, 1.40304741724743, 1.40777090222912, 1.12795223142177, 1.11619770413727
TM2D3	5	3	2	C5	2.78529344924722, 1.18294590695532, 1.32625915583351, 1.30274523450454, 1.42907782101097
TM2D1	8	6	2	C5	2.20563990722612, 1.13417611740003, 1.32414263222001, 1.46311469492742, 1.59572203504017, 1.42577924467308, 1.45160369117336, 2.01816342479354
TLN1	7	3	4	C5	1.11619985704436, 1.12449762204667, 1.36382498601697, 1.19500366180421, 1.62309080363041, 1.27833953942036, 1.13187068312109
TLK2	10	7	3	C5	2.5928345214942, 3.23485265952443, 1.3674480356834, 1.31301537849662, 1.24328934183864, 1.55482999129375, 1.2111269052117, 1.10582125882428, 1.37910467820973, 1.6130152495196
TLK1	8	6	2	C5	2.64123419362591, 1.28164697526208, 1.46396857505915, 1.27731302912228, 1.35964341764957, 1.39837953451949, 1.69592678271028, 1.32665523993968
TLE4	9	6	3	C5	5.66394302214979, 1.35533345781641, 1.37899673969707, 3.0539816356528, 2.03687150571424, 1.56376458567179, 2.70993669954971, 1.14340114658357, 2.01979120314453
TLE3	4	2	2	C5	1.36297025904841, 1.29382406892442, 1.25384995731124, 1.16053837517402
TKT	9	8	1	C4	1.38639462925089, 1.24590785603621, 1.16261656640225, 1.25069172473267, 1.1328684042923, 1.29767594003104, 1.25307812519547, 1.18174654654369, 1.17940631249141
TK1	17	10	7	C4	2.07672835641044, 1.2812978026838, 1.35458270836002, 2.09784871650969, 1.23834715524984, 1.51582038374213, 1.19229698707143, 1.25316241956287, 1.42605524006453, 1.45107438141143, 1.40891803600127, 1.99716052866224, 1.23053905790678, 1.20738790160662, 1.33285187295637, 1.34478091391404, 1.8772219704225
TIPRL	3	2	1	C4	1.28195772823812, 1.15944915123608, 1.12160604044747
TIPRL	4	2	2	C5	1.53274932769578, 1.24662301684982, 1.16880367611076, 1.2248615185597
TIPIN	8	5	3	C4	1.22863957675344, 1.10784621301797, 1.15164155519293, 1.16779195948838, 1.1986409687044, 1.11060018597827, 1.1113865574288, 1.42526710241085
TIPARP	3	2	1	C1	1.24175632394414, 1.14707502146788, 1.15605637311901
TIPARP	8	6	2	C5	4.348101446592, 1.2612475277969, 1.39544273163883, 1.27745632090722, 1.54294549084145, 1.14134203830954, 1.34530265474519, 1.6868251146411
TINF2	4	3	1	C5	2.47952306870617, 1.53082429440586, 1.12376748896693, 1.12438067592972
TIMMDC1	4	3	1	C5	1.64297258104418, 1.15976541505212, 1.15576584668147, 1.1130838868466
TIMM8B	9	7	2	C4	1.3956844128709, 1.122817718231, 1.16046226328113, 1.22616328405261, 1.14560546958834, 1.22663710724099, 1.11395714752121, 1.135801258538, 1.22450791706003
TIMM44	3	2	1	C5	1.56618417892129, 1.23950023310168, 1.17720127622735
TIMM29	4	2	2	C5	1.23931420626834, 1.11716337177612, 1.12035137531992, 1.1311865983729
TIMM23B	6	5	1	C5	3.14830500032878, 1.82513128846486, 1.15941482353519, 1.13292977780283, 1.11642448548217, 1.27109398635019
TIMM21	3	2	1	C4	1.10965822312027, 1.39727976690741, 1.12683502870253
TIMM17A	6	5	1	C4	1.27042286188133, 1.20737655436862, 1.23781713764703, 1.11740323188084, 1.16589151550215, 1.15144862947549
TIMM17A	6	4	2	C5	3.0451066328626, 1.11378015721412, 1.18003309903469, 1.2227945701937, 1.63309126418514, 1.43130353204814
TIMM13	9	7	2	C4	1.25133896123758, 1.16344434590015, 1.18653021082139, 1.14303015633604, 1.31928924628948, 1.29793117734198, 1.15445792759801, 1.17530155024417, 1.13601674629497
TIMM10B	5	4	1	C5	2.71987387650149, 1.34786816710074, 1.13435291557484, 1.1696551162402, 1.17505273601036
TIMM10	11	8	3	C4	1.28560096702723, 1.10946971631007, 1.11634035611339, 1.55012078373656, 1.12360808012396, 1.28276841042991, 1.1786682786217, 1.2069866080168, 1.1508966156919, 1.1527783957854, 1.27523247050787
TIMELESS	5	3	2	C4	1.18881269568455, 1.26936726656362, 1.19089534882395, 1.11463924743526, 1.31729413913804
TIMD4	3	0	3	C1	1.27107996979618, 1.22406962543791, 1.19780775757627
TIMD4	6	1	5	C2	1.26788941162845, 1.38488180092713, 1.25428247764947, 1.24752333284562, 1.20296761840745, 1.2037730125197
TIMD4	3	2	1	C4	1.1271350889803, 1.16685555665165, 1.53659694867099
TIGIT	5	4	1	C2	1.16673565154766, 1.18748644881285, 1.44606613596199, 1.11979156552868, 1.16662726648671
TIGIT	3	1	2	C5	1.11512481315368, 1.39909112876814, 1.91246729644552
TIFA	4	3	1	C5	1.23940703113392, 1.16975350577995, 2.71368407921221, 1.31369035043393
TIAL1	8	6	2	C5	2.02560016315448, 4.08935382852204, 1.7662822012698, 1.41038721025632, 1.58860273552403, 1.12579050067924, 1.41110910307142, 1.90395691581657
TIA1	4	4	0	C4	1.10809521403296, 1.27801652368677, 1.37612797444589, 1.18347401313446
TIA1	4	2	2	C5	1.85777318572415, 1.20664492901586, 1.19671760283253, 1.59094969640848
THYN1	8	7	1	C4	1.17840754246552, 1.12016966981973, 1.11067874163711, 1.1517869767397, 1.11735793210894, 1.27343927228174, 1.23300058884456, 1.22861509183793
THUMPD3-AS1	9	6	3	C5	7.73024171782742, 2.08082302804523, 1.41588808265126, 2.58453708574144, 1.74396954297545, 1.91289770926324, 2.03020551295515, 1.18450511247555, 2.23347275745638
THUMPD3	3	2	1	C4	1.14256175555222, 1.10820400943722, 1.21655040331489
THUMPD3	4	3	1	C5	1.97646889384049, 1.57215332144414, 1.13944508029312, 1.11320677242696
THUMPD2	7	5	2	C5	2.98297657884104, 2.69928141211169, 1.20499581331978, 1.15003242721307, 1.14573266578179, 1.37183808968052, 1.382638973964
THUMPD1	3	2	1	C1	1.22357717616628, 1.1144007398007, 1.25730731385579
THUMPD1	9	7	2	C5	5.34758140447632, 1.74646539610726, 1.55933956827154, 1.41049699166937, 3.93266875140585, 1.35031648555746, 1.32009252614673, 1.51512487786478, 1.1080111185877
THRAP3	9	7	2	C4	1.51643120584588, 1.17540806302656, 1.23992560874862, 1.14116806348582, 1.15418068647873, 1.25927736970442, 1.18588872123173, 1.15676771319549, 1.21356824495921
THRAP3	9	6	3	C5	2.4769990012752, 1.15075713880739, 1.48812444569404, 1.16167714901779, 1.30858942936487, 1.23906992754265, 1.24389530493989, 1.13345403127339, 1.28008119716571
THOP1	3	2	1	C4	1.18039338137162, 1.20879497512482, 1.15411950307881
THOC7	6	6	0	C4	1.20976060137439, 1.14718697930861, 1.11212376102394, 1.18638639453725, 1.25796265221842, 1.11907754123008
THOC6	3	3	0	C4	1.20616806600532, 1.1156871771169, 1.12277120478608
THOC5	5	2	3	C5	1.44061936299673, 1.33825327807203, 1.16892917180703, 1.2012718623747, 1.28822095707822
THOC3	3	2	1	C4	1.21316307797916, 1.24191559027401, 1.21902928129839
THOC3	3	1	2	C5	1.29818950596379, 1.19940828058805, 1.23784290688905
THOC2	11	6	5	C5	3.58021193555011, 1.19681261040902, 2.29494399522477, 1.43500493489301, 1.49226718291491, 1.15138595717126, 1.22183401936563, 1.92546047824778, 1.84165562083876, 1.76645613039834, 1.10573669707602
THOC1	11	8	3	C5	2.89918834773865, 6.97281264987735, 1.40742626657056, 1.25866958802057, 2.56233882909014, 1.40893442392936, 1.93396887483857, 1.17589495665503, 1.16177457492703, 2.72856176638989, 1.96695512218917
THEMIS2	4	3	1	C5	2.93441638658643, 1.30797118666551, 1.38062381656744, 1.40392332941568
THEMIS	4	3	1	C1	1.14261383383378, 1.17830346270202, 1.11700325546889, 1.28418197796282
THEMIS	8	5	3	C5	3.21890176067266, 1.54342799522767, 1.24537859252365, 1.60536798211895, 1.27631110853161, 1.40117532960211, 1.89530888711357, 1.6510884259497
THAP9-AS1	3	2	1	C5	2.09104147983375, 1.13542928265332, 1.3478399192786
THAP6	3	2	1	C5	2.76013392781735, 1.20018312005634, 1.25094072974551
THAP5	4	2	2	C5	3.04267284615663, 1.27340615314468, 1.24794375796128, 1.11953886805042
THAP12	4	2	2	C5	1.28746870133959, 1.26013623989349, 1.17847691167522, 1.26172885002451
THAP1	3	2	1	C5	1.69351863014965, 1.27701649641697, 1.15760607877816
THADA	4	2	2	C5	2.53498301185596, 1.21942824955729, 1.1929211047516, 1.49194881511788
TGS1	7	6	1	C5	2.24278487875101, 1.20927465757488, 1.16048248402364, 1.16301305319094, 1.23929008916426, 1.62254383286754, 1.4523274521086
TGOLN2	13	7	6	C5	1.91065238509442, 6.57110552584614, 1.45306873590717, 2.24259943047346, 1.82783873896062, 1.82989947231143, 1.63345336055708, 1.18614945998341, 1.79786038029768, 1.80449892434919, 2.52401274871456, 1.14261088573346, 2.2529858100392
TGFBR3	8	6	2	C5	4.46593044635513, 1.6871328924861, 2.22904583208529, 1.4873992151055, 1.92644110965965, 2.43059435045752, 2.12126878977821, 2.2002966715935
TGFBR2	7	5	2	C5	1.35851194226663, 1.14129498339356, 1.11558977614947, 1.42710990926053, 1.15022412344846, 1.33115553914262, 1.9121169831443
TGFBR1	4	3	1	C5	1.71390833285625, 1.70214719812775, 1.16848129087401, 1.25411350211692
TGFB1	5	4	1	C1	1.34211304711563, 1.14958536950471, 1.11358634505733, 1.12771484497659, 1.53435162968872
TGFB1	11	7	4	C5	3.40830650714033, 1.53910831550485, 2.13080989782259, 1.22053289444535, 2.13961907697859, 1.40920031766814, 1.16460040308677, 1.41302625390463, 1.27639233367769, 1.14093256794228, 1.31208150420274
TFRC	7	5	2	C5	4.78958668495273, 1.21270331999936, 1.5695698902707, 1.78659819455518, 1.34354161527027, 1.5670646168768, 2.43258326208988
TFG	6	5	1	C5	2.78737352758, 4.4748893541315, 1.36274118562868, 1.29001961173691, 1.38473663152565, 1.65815965274889
TFDP2	3	2	1	C1	1.2143307056931, 1.15768752392576, 1.50034422631596
TFDP2	5	2	3	C5	2.74173390708928, 1.64039322184258, 1.12392388193929, 1.11856461273409, 1.36115730977047
TFDP1	15	9	6	C4	1.47822227119079, 1.11349183054069, 1.26037225780238, 1.25641274358201, 1.22785292616244, 1.23890889762052, 1.16767862697445, 1.25757744166014, 1.20959376911941, 1.19652991107064, 1.30551169736608, 1.13472497228516, 1.13833381830567, 1.17389490831729, 1.3580928101004
TFAM	4	3	1	C4	1.2687017688763, 1.23346889448217, 1.15163483457784, 1.26130384451057
TFAM	3	2	1	C5	1.31899343132112, 1.25684726759862, 1.30968851631538
TEX30	5	3	2	C4	1.1175192518905, 1.10664404799698, 1.1381028535833, 1.20680937126166, 1.16830655796715
TEX264	3	3	0	C4	1.19360271451166, 1.143760505722, 1.15770310257927
TET2	6	5	1	C5	4.97235419762264, 3.33992544713014, 1.43800756098159, 1.49827625401937, 1.49065747308609, 1.97973711505454
TESPA1	3	1	2	C5	1.40885822717512, 1.23780031971266, 1.13219783037257
TESC	7	5	2	C4	1.52146269629767, 1.14514759920028, 1.20500026244156, 1.17637042308477, 1.1320935229562, 1.1342228462381, 1.15415769906238
TESC	5	3	2	C5	1.28086462719697, 1.27244594111437, 2.08449302760295, 1.11757050239815, 1.43130758692954
TES	11	7	4	C5	2.50940122408885, 1.40640420890736, 1.1642132929678, 1.46484889472522, 2.25857501102619, 1.21493529023393, 1.2852560885736, 1.82622253443036, 1.45867909463685, 1.14895485579, 1.79183206719401
TERF2IP	4	1	3	C2	1.12184069332118, 1.11054609989413, 1.17141293565112, 1.18565193017786
TERF2IP	8	6	2	C5	7.04600387194671, 1.20482625807981, 1.50176405261897, 1.12887583417312, 1.53012934244361, 1.2883399139964, 1.37916091028233, 1.81217410173143
TERF1	7	6	1	C5	5.39601787743168, 1.25960575949257, 1.55673441894787, 1.34286903032951, 1.88862494707763, 1.21575059940496, 1.68158129553864
TEP1	4	2	2	C5	1.26064717039187, 1.36273691822679, 1.38299877262748, 1.38223683914105
TENT5C	5	3	2	C2	1.14236666727899, 1.16307155015269, 1.14248772574333, 1.15568830522397, 1.64774836614872
TENT5C	5	4	1	C5	3.68120080492777, 1.12831539824983, 1.32934165900176, 1.26241585028603, 1.40797712543717
TENT4B	7	5	2	C5	5.35588816813612, 1.20664686797499, 1.24769604802411, 2.80597865972328, 1.54982968783662, 1.63667046886186, 1.58768710498902
TENT4A	6	4	2	C5	5.29621913529229, 1.16152155126587, 1.22458184909665, 1.32673067290601, 1.6120054035983, 1.36775836323969
TENT2	7	5	2	C5	6.85248254312929, 1.74157907148521, 1.3805877548499, 1.65180487479395, 1.13122065788857, 2.00249255359953, 1.96171013150573
TENM1	4	3	1	C5	2.62279953861934, 1.38290976074777, 1.71951226376992, 1.43000915776563
TEDC1	5	4	1	C4	1.14242681768788, 1.22293234602867, 1.11839432283826, 1.11023581795213, 1.28031644266952
TECR	9	6	3	C5	3.94980676839124, 2.30409310543382, 1.37715298975546, 1.15840032690259, 1.29016442750182, 1.27141719389892, 1.59196513919271, 1.15497926861468, 1.55453847931114
TECPR1	7	4	3	C5	1.28312145512837, 1.20316372840318, 1.11162702708746, 1.26191387551882, 1.97216107596634, 1.85056330019866, 1.40642012834578
TDRD3	4	3	1	C5	2.19226615098749, 1.3168216283548, 1.29295514432884, 1.3469657769314
TDP2	3	1	2	C5	1.87381867483315, 1.18988973901954, 1.25905750048675
TDG	5	4	1	C5	3.62402005497348, 1.29278518552762, 1.17427738963364, 1.16987813837158, 1.26085261171265
TCTEX1D2	4	2	2	C4	1.19493237304492, 1.26101144629379, 1.12121754609822, 1.25945099109711
TCP11L2	5	4	1	C5	2.45710225868366, 1.30303839841128, 1.17595650341488, 1.47546473434419, 1.23147983688019
TCP1	12	9	3	C4	1.64827170172197, 1.16193649721316, 1.15417906816624, 1.19870971886763, 1.11775471639823, 1.13361817693878, 1.1766087897006, 1.27633558414377, 1.29050618378093, 1.27335663106951, 1.1260852782709, 1.19096990416346
TCP1	7	4	3	C5	3.98453939416046, 1.26413178283335, 2.0205912790556, 1.21052559887941, 1.18382363746941, 1.14845488175798, 1.36341599909628
TCOF1	3	3	0	C4	1.55699220498691, 1.12759259836394, 1.12287284204049
TCOF1	11	7	4	C5	2.76422476272808, 4.16089951205431, 1.4127168249862, 1.52617027304014, 1.45281527905377, 1.68393016730625, 1.39337210765324, 1.15375872227447, 1.85158644447818, 1.58079005955779, 1.77753719239822
TCIRG1	6	3	3	C5	2.95999482446775, 1.33108001040488, 1.17208115219671, 1.15512233671421, 1.28623222280819, 1.51857180628742
TCHP	6	4	2	C5	1.51620784090405, 1.12999690784128, 1.11908111598975, 1.31948524205447, 1.71565537113717, 1.51588063119403
TCF7	9	6	3	C5	2.56269033513333, 1.18378920922362, 1.36608233148686, 2.71610494526787, 1.4574496761142, 1.20968513923849, 1.22636921918003, 1.98462534869908, 1.68383722928025
TCF7	8	4	4	C6	1.14114481903821, 1.25704870242611, 1.20780352363417, 1.56335426825745, 1.57448781860782, 1.30069790102642, 1.18762851705156, 1.33540774420972
TCF3	3	2	1	C5	1.22755183719534, 1.17310217802071, 1.16360834241483
TCF25	3	3	0	C1	1.112402237306, 1.26817731470904, 1.24738079643336
TCF25	10	6	4	C5	8.16828407980158, 1.72439922516053, 1.85604309732422, 1.79375356508216, 1.76426314215346, 1.69006397568081, 2.9790910315024, 1.57354466586921, 2.8431214015548, 1.5898490449764
TCF20	3	2	1	C5	1.35177344624909, 1.16755751116967, 1.24092091572303
TCF19	10	5	5	C4	1.17261926949247, 1.22769561936365, 1.11927523268902, 1.11624025249768, 1.14755921319317, 1.21633404258018, 1.1565668124648, 1.16143536291856, 1.18496627668118, 1.26717223664845
TCF12	4	3	1	C5	1.14445117377392, 1.17826629957239, 1.52797592020915, 1.2097711680467
TCERG1	4	3	1	C4	1.24958999002505, 1.31865053043996, 1.33787304927438, 1.31312292832635
TCERG1	9	5	4	C5	2.94817576013905, 1.19903680251858, 1.37032582036989, 1.25506696360349, 1.45015836367011, 1.18531225632425, 1.58148420708387, 1.44779678976235, 1.70423066163125
TCEAL8	3	2	1	C4	1.20913475046157, 1.11390048583186, 1.13845093576785
TCEA3	4	4	0	C6	2.45395363462031, 1.54845683414396, 1.20549359675273, 1.21526275724676
TCEA1	8	3	5	C4	1.26136742410949, 1.15988963522891, 1.19044129937806, 1.43760016805486, 1.14929060278075, 1.11684762384401, 1.19133009146951, 1.12654758566432
TCEA1	7	5	2	C5	4.974579410773, 2.25894790870403, 1.2600142836148, 1.31548075889432, 1.22734172297692, 1.12576402310147, 1.54334021763293
TC2N	11	8	3	C5	2.97391557971241, 6.71183916814591, 1.1591100817247, 1.97646943943841, 1.91921952167405, 1.60748483873597, 1.41652515929466, 1.58144237458231, 1.27733255199702, 1.53177809778924, 2.21492051941425
TBX21	5	1	4	C1	1.10597380475786, 1.13934252198331, 1.18388217691301, 1.16204548942127, 1.56497242696403
TBX21	6	5	1	C5	1.91900547589038, 2.1762032980256, 1.49871850568343, 1.30346337470411, 1.16720084668781, 1.24263186935588
TBRG1	7	5	2	C5	3.4038757821296, 1.32543258441361, 1.13625694287123, 1.1831235624726, 1.59225378605911, 1.36626223104417, 1.33388688349868
TBP	4	2	2	C5	1.28777807558223, 1.62295811445262, 1.14939319440775, 1.14516796132762
TBL1XR1	10	6	4	C5	4.48101471918418, 1.93627201406768, 1.65218800959888, 2.6295102580475, 1.81730200944792, 1.37848749630843, 1.13467250434609, 1.354091032644, 1.20492267918294, 2.72847444080047
TBL1X	3	2	1	C5	1.26412476798521, 1.36083440949288, 1.68131463491359
TBK1	5	4	1	C5	2.42836896283836, 1.50852513080494, 1.15528172561984, 1.38902127399645, 1.32825892602966
TBCD	6	4	2	C5	1.81122042193694, 1.18240781347632, 1.19462404037524, 1.19894827522602, 1.4275143674324, 1.45600463240312
TBCC	3	1	2	C1	1.18183343033697, 1.14410818266473, 1.16488899602998
TBCC	6	3	3	C5	2.08713989335973, 1.31909924467816, 1.20105818580452, 1.11255463293075, 1.15756225418197, 1.28771665628661
TBCA	4	4	0	C4	1.24220799439472, 1.10809303500046, 1.12629670012896, 1.15865743540091
TBC1D5	7	5	2	C5	2.02673266667661, 1.21104445815605, 1.34762575778583, 1.17135712243111, 1.14451271780401, 1.36042276749994, 1.22642083925615
TBC1D4	3	1	2	C5	1.10644689475273, 1.1740523402074, 1.21224576104022
TBC1D31	5	3	2	C5	1.52415312442528, 1.33338592708332, 1.27948532787246, 1.20988190739895, 1.21925684610756
TBC1D2B	9	6	3	C5	4.34196561457993, 1.31432654767698, 1.70341720927448, 1.18781008929295, 1.62814119697359, 1.14570367489551, 1.200500087039, 1.23549295656388, 1.74858624250649
TBC1D23	5	4	1	C5	3.46224606131208, 1.63945525250351, 1.31208853278469, 1.18334546135812, 1.25488881091412
TBC1D22A	5	4	1	C5	2.26947445278666, 1.4732320183704, 1.1752845806448, 1.50496077458979, 1.37322326345443
TBC1D20	5	3	2	C5	1.67921540402718, 1.2977768812986, 1.25863305739878, 2.0740454309055, 1.42262147635238
TBC1D15	7	5	2	C5	2.75930394549511, 5.26200546621154, 1.30940010502612, 1.28037376315692, 1.23913412935429, 1.16863626664917, 1.76149059513894
TBC1D10C	4	3	1	C1	1.2397056730688, 1.44324341872888, 1.14451896891954, 1.35981562709102
TBC1D10C	12	7	5	C5	2.58340258424797, 1.24556783276568, 1.32966994922582, 1.54009252269356, 1.25693834334809, 2.30322100803631, 1.30213021877373, 1.36869227310831, 1.35287017103764, 1.81386409552694, 1.48569928022687, 1.19280322298596
TBC1D10B	3	2	1	C4	1.14140501979632, 1.13427551423264, 1.10833875758596
TBC1D10B	3	1	2	C5	1.1597353211873, 1.14789939674518, 1.11770256731993
TBC1D10A	3	1	2	C5	1.10798104109686, 1.13100360140122, 1.14336055653689
TBC1D1	7	3	4	C5	1.92857328467889, 1.19668818761905, 1.24094166185144, 1.28665345044147, 1.23583564892472, 1.26904453399036, 1.48029749377066
TAZ	5	3	2	C5	1.77058311631052, 1.10522088486112, 1.14410810285353, 1.34203880096338, 1.1297820268583
TAX1BP1	5	3	2	C1	1.11689471649366, 1.14610368567224, 1.22560427282101, 1.1412468377862, 1.26085962394144
TAX1BP1	9	6	3	C5	1.55785211952941, 5.04382106386922, 1.33181891705495, 1.92420774967148, 1.3706412278036, 1.2971163736177, 1.68074951582363, 1.14376824640436, 1.41455308564608
TATDN3	3	2	1	C5	2.22700225812605, 1.16226478610746, 1.25961119403912
TATDN1	4	3	1	C5	1.17632090952501, 1.14183052686553, 1.83059501460915, 1.1151944518253
TARSL2	7	5	2	C5	2.79975698016355, 1.38358196286196, 1.17362036591967, 1.22361137212069, 1.36883265166874, 2.54656970751117, 1.21316242085361
TARS2	4	0	4	C5	1.23942213165131, 1.22689582074214, 1.33233242630257, 1.95625799766827
TARS	5	4	1	C4	1.15427649785668, 1.14214472882287, 1.18469270479769, 1.13028201172876, 1.12737181538225
TARS	3	2	1	C5	1.81745079402356, 1.22030353571527, 1.13837136520992
TARDBP	6	3	3	C5	5.46952557272026, 1.36899791218971, 1.39508635009262, 1.35438213934868, 2.11018264714073, 1.11895141866452
TARBP1	5	2	3	C5	1.2236521577791, 1.18298958597926, 1.16738599392862, 1.17401066889449, 1.47289547901385
TAPBPL	3	2	1	C5	1.39602074265776, 1.28134015603102, 1.3018853817443
TAPBP	14	7	7	C5	7.14643993427863, 1.68869526674124, 2.41440866939196, 2.84387109491373, 2.12520180303097, 1.98404495927331, 1.65017106343696, 1.22350590976766, 1.40672934617339, 1.31120721278242, 1.73866993039449, 3.01463691056307, 1.15615495512408, 1.91338680090925
TAP2	8	4	4	C5	3.23652800295433, 1.13636763569951, 1.1977868263309, 1.25350947845452, 1.21887012979905, 2.6486611291685, 1.67322457177147, 1.56360883199471
TAP1	4	4	0	C4	1.31397630967606, 1.14817120305767, 1.31044612508713, 1.30627775320055
TAP1	8	5	3	C5	2.04117890367085, 1.23963671920956, 1.3905852661858, 1.23920379678798, 1.10970658466658, 1.12287863839814, 1.49183250148604, 1.27718259742602
TAOK3	11	6	5	C5	6.29473847058463, 1.66722458447794, 1.84395494772123, 1.69389605570375, 1.67522289756808, 1.44896274606451, 1.12980044524484, 1.65709914170505, 2.36167720171958, 1.11263155199152, 2.00144012425215
TAOK1	7	4	3	C5	2.81753392828684, 1.6518921891302, 1.31684157365745, 1.58815660903668, 1.76433829933508, 1.18621265520785, 1.95580004922307
TANK	5	4	1	C5	3.57208978951809, 1.24341197480677, 1.18387528772777, 1.16098911634086, 1.67512157346417
TALDO1	13	10	3	C4	1.61496122592262, 1.19389033276703, 1.26007978277403, 1.38114511029584, 1.32460842498962, 1.32203689725747, 1.21960084634065, 1.1469585334433, 1.29419936629434, 1.36485960588338, 1.21050653300772, 1.30258462285505, 1.33054061721611
TAGLN2	9	7	2	C4	1.33731312152165, 1.54692038586938, 1.20295953041181, 1.15091534684847, 1.18226445806681, 1.32132848393262, 1.1724566152261, 1.23691594125692, 1.15790974281151
TAGLN2	3	1	2	C5	2.27554086147496, 1.14022150924689, 1.14556892921442
TAGAP	3	2	1	C5	1.33640501700479, 1.15185984350102, 1.66741309331765
TAF9	3	2	1	C5	2.05282008525443, 1.12656319959046, 1.10646095895099
TAF8	8	6	2	C5	1.6089327906559, 1.16825099148412, 1.34608542981543, 1.11166349393571, 2.77672623604546, 1.20004966578309, 1.18234249222956, 1.51891215741417
TAF7	8	5	3	C5	2.63469536221395, 1.16231994098281, 1.1651547094297, 1.13410122021741, 1.22574595883262, 1.32916701234776, 1.39079900263722, 1.13992413834954
TAF5L	4	3	1	C5	1.46735049901883, 1.62848357842742, 1.42784165212346, 1.40210693284222
TAF3	10	6	4	C5	1.3402136729759, 1.74191831072491, 1.85748238898463, 1.2083738633652, 1.3559358105503, 1.22531670261118, 1.36194857072175, 1.26009251789183, 1.52925254506672, 1.69101522544511
TAF2	7	5	2	C5	4.42533948458776, 1.50724857496657, 1.16975902179374, 1.88248395716614, 1.39099447783672, 1.24891176818805, 1.466488072602
TAF1D	11	7	4	C5	7.88494129938427, 1.61827998399831, 1.70761476883013, 2.94611051723947, 1.61943020732506, 1.64801506795082, 1.38864440132155, 1.14934494908201, 1.13729937188067, 1.16465898032641, 2.3188433403692
TAF1B	5	3	2	C5	2.15147524401502, 2.77687652372226, 1.2953770300054, 1.60088875103942, 1.14265108455385
TAF15	10	6	4	C4	1.29937767461434, 1.40084416636321, 1.16024685625183, 1.37089023542472, 1.21231239671113, 1.28915790468549, 1.10883088420697, 1.14227291754466, 1.12447859111769, 1.21217719320356
TAF15	6	3	3	C5	1.60415028346302, 1.13166720825603, 1.24226856571365, 1.22465164078395, 1.54433652240695, 1.24374642007262
TAF11	3	3	0	C4	1.1378661812428, 1.10564758348843, 1.21005897871938
TAF11	4	3	1	C5	3.60139730697343, 1.25367236243105, 1.54959810282424, 1.55768670032049
TAF10	4	3	1	C1	1.14597082676209, 1.11062765618299, 1.22660379683883, 1.14288240424537
TAF10	3	2	1	C5	1.31969266545237, 1.213062422243, 1.2506980849288
TAF1	8	5	3	C5	3.49134355972024, 1.31811291926337, 1.32544719675793, 2.74840208930396, 1.14875498612687, 1.22781123182045, 1.40829987911579, 1.71217094092523
TADA3	5	4	1	C4	1.2398563007777, 1.13130495665674, 1.12760584826373, 1.11442493604429, 1.22774418474747
TADA3	4	3	1	C5	1.72171841953952, 1.21564615053404, 1.10619742873329, 1.26443891137354
TADA2B	3	2	1	C5	1.2594326009092, 1.17514704672689, 1.12263070423272
TACC3	13	7	6	C4	1.20996682728275, 1.21321535350757, 1.43634850554616, 1.13569280528833, 1.11685482537805, 1.11102301796896, 1.2247694357615, 1.20955600031661, 1.22926585203199, 1.11239997686239, 1.11288783935877, 1.16424690818294, 1.50937159361846
TACC3	4	1	3	C5	1.4266948518131, 1.29958069727704, 1.17823258644298, 1.10763161006999
TACC1	4	4	0	C4	1.49023026286633, 1.38463648243112, 1.14300718303328, 1.18597843200074
TACC1	8	5	3	C5	7.11301732872949, 1.67973358505168, 1.4956452555608, 2.00726312157482, 1.22620670592901, 1.65284607809941, 2.24602961381508, 1.12081777900216
TAB2	4	3	1	C5	1.28282160596865, 1.23557729681773, 1.32979726581625, 1.32212156995773
SZRD1	6	4	2	C5	2.32478021078068, 1.68364848631227, 1.2264651793188, 1.24098312723974, 1.24769179521351, 1.5810090239528
SYVN1	3	1	2	C5	1.24831449602471, 1.73598633404177, 1.14438405257415
SYTL3	3	2	1	C1	1.37769168378027, 1.12146763192915, 1.56383902531263
SYTL3	9	6	3	C5	10.8577827386203, 1.22909625446267, 1.11507680352739, 3.46324899744137, 1.45071407378389, 1.57711663244599, 1.33986872640288, 1.41855000670806, 1.15142165506531
SYTL2	8	6	2	C5	2.80595261297789, 3.88285655485125, 1.19779944058001, 1.60419516081933, 1.57669876281585, 1.4354938900582, 1.20753858570076, 2.28389529890763
SYTL1	10	6	4	C5	2.27576370099446, 1.87766583074622, 1.22605148291716, 1.41868051901403, 1.23350778280665, 1.21453944836423, 1.12900186429822, 1.16129951839668, 1.49165297373389, 1.36833462739752
SYT11	5	3	2	C5	2.24744009067193, 1.17543855614767, 1.24192665012468, 1.80893785354076, 1.30355575603016
SYS1	5	4	1	C5	1.32095720634991, 1.27200017406129, 1.21907302972522, 1.20756577731747, 1.16731895799451
SYNRG	10	6	4	C5	3.23071712283213, 1.11413651550627, 1.42336489443214, 1.38520247443821, 1.40323281692393, 1.29625023691344, 1.10940075872237, 1.12263704631793, 1.39216151232307, 1.65053347725403
SYNM	3	2	1	C5	1.69183225839455, 1.19569087979693, 1.68584019607616
SYNJ2	3	2	1	C5	3.27971295763809, 1.13418807537845, 1.31243118447912
SYNGR2	4	3	1	C5	1.2375711172848, 1.13530617035385, 1.17500640491084, 1.16159737899796
SYNE3	5	2	3	C5	2.26533186344143, 1.24853940479934, 1.15299034907895, 1.22693817509266, 1.37877117536116
SYNE2	3	2	1	C1	1.34429450126525, 1.17240060905046, 1.15594239021403
SYNE2	14	7	7	C5	1.71885921782517, 12.2507847825505, 2.99304177179088, 2.82076460583341, 1.95776404954703, 2.72842518688575, 1.97549195417118, 1.30581110950833, 1.94640717341504, 1.46084053984147, 1.5788978086096, 4.31313705014744, 1.2237028270002, 2.9341594117962
SYNE1	4	2	2	C1	1.32473402638836, 1.18465890792382, 1.1654649806597, 1.69918666914721
SYNE1	11	7	4	C5	8.23369917786329, 11.4798428354092, 3.15338546435197, 1.76892264942211, 2.21451260281139, 2.87675637069789, 2.80492739367606, 2.26960730132097, 1.25788371298977, 3.67943496401448, 2.04663438469112
SYNCRIP	10	8	2	C4	1.41752084042793, 1.12476626518277, 1.34893487415031, 1.51721701228914, 1.13915275500458, 1.22481511506111, 1.15651096050691, 1.21533384859768, 1.13780773100037, 1.31934750576363
SYNCRIP	6	4	2	C5	3.64776059912135, 1.11584669095795, 1.31105569449484, 1.13443685238565, 1.57876292340846, 1.90673069653764
SYNC	5	4	1	C5	1.94341814623737, 1.26007448326145, 1.1271524860577, 1.11105491309603, 1.2062917128662
SYMPK	8	6	2	C5	2.44776375399368, 1.27961694745776, 1.52260779581355, 1.25339272070326, 1.21708460664873, 1.37212757321418, 2.18215085022003, 1.64637340497342
SYF2	6	4	2	C1	1.17997036462866, 1.24479382785392, 1.13077907700177, 1.12748157488566, 1.1052684653568, 1.11376853071207
SYF2	11	8	3	C5	1.33233723707338, 3.2932453268044, 1.50057412395183, 1.58783630801237, 1.81467777540596, 1.23472015085717, 1.18426826588549, 1.20708966263436, 1.44559193741309, 1.15538779980562, 1.20467169454449
SYAP1	6	5	1	C5	5.82237007973465, 1.12536173277268, 1.1519933141007, 1.44331659251776, 1.15014158770919, 1.37434105250965
SVIP	7	1	6	C4	1.51778047088634, 1.22483553432273, 1.17231962654235, 1.13719912155328, 1.19363043077279, 1.16267266979824, 1.5373103398956
SVIP	3	3	0	C6	1.35852901250565, 1.25547382292583, 1.13445177703409
SUZ12	12	7	5	C4	1.26667582531998, 1.60756999346125, 1.30771217448139, 1.46086023644065, 1.13535274592599, 1.25469993598136, 1.13680724938262, 1.25912824913616, 1.1639578478096, 1.18305764832324, 1.18933671306427, 1.62973983478809
SUZ12	6	4	2	C5	5.11266584816334, 1.80376865565278, 1.39424603485831, 1.4194240013376, 2.00077629731314, 1.70821295582326
SUSD1	4	2	2	C5	1.18885810119342, 1.1574589255213, 1.45566624770294, 1.13394845004648
SURF6	3	1	2	C5	1.11161325027304, 1.11324176321783, 1.19274007241745
SURF4	7	4	3	C5	3.90927955210761, 1.27632653712948, 2.61880530942666, 1.54957684827346, 1.69857737074574, 1.46666891011006, 1.39841360925171
SURF1	3	2	1	C1	1.32302135920755, 1.11051574501386, 1.1142041818358
SUPV3L1	9	6	3	C5	2.6569052524859, 5.65002372836561, 1.4065138579491, 1.19530868074866, 1.34764633543822, 1.21163882472279, 2.03859619846658, 1.14053008189017, 1.49211178187631
SUPT7L	5	2	3	C5	1.40608288886447, 1.57915329954818, 1.13218903842635, 1.20808433062922, 1.71091704460799
SUPT6H	7	5	2	C5	2.27877926763697, 1.15207619470498, 1.26251054062564, 1.37232978926597, 1.1210687569884, 1.4760155284751, 1.39943249528637
SUPT5H	10	7	3	C5	2.46949121504689, 4.97317974567173, 1.16477887604083, 1.37507147156973, 1.28013491347663, 1.50351262649678, 1.13270640737726, 1.21057471078593, 1.63189396043462, 1.79787263867074
SUPT4H1	4	3	1	C1	1.19097983055826, 1.11842571496555, 1.17537546344904, 1.13665620011068
SUPT20H	5	4	1	C5	1.45697167773909, 1.16164578837144, 1.40654448731978, 1.25128084253173, 1.20340447771974
SUPT16H	16	10	6	C4	1.70165613173464, 1.22475876777321, 1.25428071629152, 1.68531737732684, 1.20312111345005, 1.38120589908598, 1.24785148471825, 1.49687096594557, 1.74654268726208, 1.36831533201596, 1.13370328791606, 1.24666962366118, 1.12708178042739, 1.25803739461679, 1.11487661877186, 1.64442921021331
SUPT16H	7	5	2	C5	1.52459393304684, 1.64953051003594, 1.38046725509701, 1.2057560640459, 1.20405987111552, 1.53084122622551, 1.14542282197128
SUN2	3	2	1	C1	1.20307570543523, 1.12191787561059, 1.39090620124939
SUN2	10	6	4	C5	1.65346428707381, 1.45081720212594, 1.73295716884882, 1.32931107798807, 1.47857239185106, 1.45266561901357, 1.12071779108369, 2.27908160686484, 1.31360614253558, 1.42038780130627
SUMO3	8	3	5	C4	1.26913454894332, 1.20577378819195, 1.14246113745798, 1.14257593438306, 1.12775488417815, 1.12878661887147, 1.12597679693032, 1.2855141880344
SUMO2	3	2	1	C1	1.20652332654931, 1.13706460722177, 1.16918787156601
SUMO2	13	7	6	C4	1.34990040239662, 1.18669645243028, 1.14852304446851, 1.3648120221549, 1.43160691242884, 1.20977319989981, 1.15814385422139, 1.2436731651154, 1.11514414756694, 1.15589749576541, 1.23989093004559, 1.23342093994783, 1.25949530004238
SUMO1	4	4	0	C4	1.26895163627394, 1.32716087163584, 1.17845759492136, 1.1864124180033
SUMF2	11	7	4	C5	2.32386672407656, 2.18366466305979, 1.20899260308936, 1.82292836105877, 1.24484747863981, 1.18765907326372, 1.18657943414377, 1.1772849200615, 1.15461664701157, 1.41354952280231, 1.45245701225113
SUGT1	5	4	1	C5	1.65508246511766, 2.48069844175472, 1.15999804580648, 1.11429915118588, 1.2444930143059
SUGP2	10	5	5	C5	7.20121286203898, 1.6695169216398, 1.65339347745819, 1.69067746452378, 2.18323853492264, 1.63126274802155, 2.43123215286444, 2.59997186347849, 1.14746393063882, 1.78507045867848
SUDS3	5	4	1	C5	2.29321746847831, 1.24198240946711, 1.10901011768693, 1.12475941299648, 1.11384139129188
SUCO	9	6	3	C5	3.3688512054981, 1.22842218685496, 1.42467460426465, 1.36085248503587, 1.51213587326931, 1.28644392258848, 1.25453464902986, 1.20442316640755, 1.66140714690827
SUCLG1	9	7	2	C4	1.33907152228163, 1.19608666898911, 1.1198469202213, 1.30322533776528, 1.11394622011703, 1.28454421388797, 1.23829224292777, 1.16665629217295, 1.36461403484341
SUCLA2	7	5	2	C5	4.47107374902142, 3.24422711179232, 2.32206584868103, 1.17550029468587, 1.12931582929196, 1.24727099667805, 1.20683631241612
SUB1	9	9	0	C4	1.51654066316752, 1.12839754335123, 1.37075896594652, 1.20200925649965, 1.46117630855051, 1.18683371095365, 1.77023796086748, 1.48894567834757, 1.30049290400675
STYX	6	5	1	C5	1.24946547090408, 1.35538217987425, 1.70473901233642, 1.11707696362899, 1.21970094102531, 1.22331450754291
STXBP3	6	4	2	C5	1.50223367078169, 1.11082993048449, 1.19051593815441, 1.19579037800797, 1.21931708248878, 1.17754493552676
STXBP2	7	5	2	C5	2.51710931422414, 1.21490737350627, 2.60139164838111, 1.17735944736016, 1.13025772588447, 1.33583695413809, 1.38563838509594
STX7	7	5	2	C5	1.96358269178278, 1.75699627142613, 1.1864052612512, 1.20617493740313, 1.15750916832511, 1.2817897620766, 1.38741277958184
STX6	4	4	0	C5	1.42328856616243, 1.29224903177114, 1.31630184349648, 1.11595238520315
STX5	4	2	2	C5	2.59779357302299, 1.21955506733138, 1.32507804502354, 1.14396038909369
STX4	6	4	2	C5	2.01755831015363, 1.28155030975348, 1.13254726458577, 1.29753933570759, 1.23446813121889, 1.19287610006921
STX2	5	2	3	C5	1.68479781717977, 1.63919648814547, 1.32974570007235, 1.14563459759145, 1.24000985849934
STX17	4	2	2	C5	2.2305032370331, 1.61313215010448, 1.18609198639058, 1.20391470760496
STX16	11	7	4	C5	4.36970023701685, 1.50777355335763, 2.38966936860732, 1.43878100206568, 3.88901553694413, 1.40115060839109, 1.12900066172115, 1.14762813413418, 1.52970208353038, 2.69948785638638, 2.31823033047014
STX12	5	4	1	C5	1.86922234442529, 1.16100904115239, 1.21774936738875, 1.22241115132254, 1.44918352868887
STX11	3	3	0	C4	1.13573276517453, 1.11483931344717, 1.1078143598327
STX11	3	3	0	C5	1.72553015739287, 1.16446098503615, 1.11350751376712
STX10	3	3	0	C5	3.01521103627518, 1.40970146914767, 1.19348716603466
STUB1	5	4	1	C5	2.05243389511332, 2.00309904353096, 2.72713163315983, 1.19460466550804, 1.38589065232175
STT3B	8	6	2	C5	3.9597500969194, 5.20679916889751, 1.36812142380388, 1.45574335440723, 1.93092586101766, 1.37349899647644, 1.99870211329851, 2.05898504688975
STRN3	4	2	2	C5	1.2056251803479, 1.49835126762845, 1.27546944663032, 1.46851982511518
STRN	8	5	3	C5	2.68988088239076, 1.25234929734092, 1.17646356057816, 1.25080194386231, 1.13736050607218, 1.47175030233807, 1.49690112873659, 1.44126089333911
STRIP1	4	1	3	C5	1.45126377433185, 1.13377818360626, 1.16416643398663, 1.31045488818254
STRAP	4	4	0	C4	1.3619365041012, 1.13997400730354, 1.28385159145481, 1.12118604126468
STRAP	3	3	0	C5	3.88550992644812, 1.11547065620947, 1.1653285018303
STRADA	6	4	2	C5	2.35755496748074, 1.24498758455774, 1.27488369127166, 1.24621789460122, 1.58484136014019, 1.39135409415702
STOML2	12	9	3	C4	1.22490491718072, 1.11710408589309, 1.12762228372904, 1.34385923763877, 1.12630773146433, 1.14527627554035, 1.26124525400971, 1.24639989810973, 1.18104105617694, 1.1482361281951, 1.21084672985459, 1.23254197641483
STOM	3	2	1	C1	1.34135949202503, 1.22344130545704, 1.12401796932569
STOM	5	2	3	C5	3.52204198086011, 1.10752497476687, 1.12136501866938, 1.13851722487364, 1.20718426496658
STMN3	8	5	3	C5	4.00900355803605, 2.22069735486082, 1.20562709183756, 1.3904469215513, 1.12852992457788, 1.43470039233548, 1.61653834186246, 1.47012916097525
STMN1	17	10	7	C4	6.90781952957308, 4.58406651646506, 3.927961721538, 10.9770377126421, 4.40296573389299, 5.601870670491, 3.31836429221197, 4.87321923684088, 5.23115784340808, 6.33399321148471, 3.03503599194857, 4.09828420290426, 2.58025108721893, 2.25428358906774, 3.80161235462814, 2.97606349537373, 5.99339818423427
STK40	3	0	3	C5	1.10788655417569, 1.52122258507873, 1.13474056114345
STK4	3	2	1	C1	1.2696004302819, 1.22491144830406, 1.31464383202499
STK4	13	8	5	C5	1.22265637785797, 8.72890643284519, 1.97455805541153, 2.85245198990771, 1.83064115721309, 1.53260423044165, 2.46405994892283, 1.65061075686242, 3.20253531467418, 1.59981992505545, 1.51364531904773, 2.34794165309022, 1.32982288271305
STK39	3	2	1	C4	1.34462351685123, 1.17542405279217, 1.13189360256177
STK39	4	3	1	C5	2.78083700006487, 1.47480476707168, 1.13763486738985, 1.53348875258974
STK38	3	1	2	C1	1.17324232194047, 1.13553987055847, 1.4271315285948
STK38	11	7	4	C5	2.40823250285143, 4.07531819938881, 1.28185462359194, 1.54150303724783, 1.60512472168983, 1.17762493416724, 1.3612668609363, 1.16219945152447, 1.16066513039866, 1.51008863454332, 1.76102242177815
STK26	3	2	1	C5	1.8181616348285, 1.1363291357207, 1.41428085553994
STK25	3	2	1	C5	1.19548428313667, 1.15731988535469, 1.38844640972312
STK24	3	1	2	C4	1.21962296460559, 1.13096636192083, 1.22433405837852
STK24	7	6	1	C5	2.79051245865983, 1.78612131573022, 1.16860674587734, 1.15234645127308, 1.24943302195786, 1.13722156497439, 1.55360919128355
STK17B	3	1	2	C1	1.16690510584683, 1.12875524031037, 1.41239041792986
STK17B	3	0	3	C2	1.26422707927948, 1.1857348964291, 1.60020754837059
STK17B	3	0	3	C3	1.17612714079503, 1.18372139821219, 1.15485320364183
STK17B	10	8	2	C5	2.01213035278646, 7.1932380393808, 1.42184298416441, 2.05922076495545, 1.55796924592169, 2.58472430664147, 1.74624078931988, 1.48563599271957, 1.95835516202833, 1.22693575323588
STK17A	5	4	1	C2	1.11484739399054, 1.22356943973909, 1.32339919295445, 1.37006195548548, 1.14699705927928
STK17A	8	6	2	C5	4.32246893153888, 1.49547959184011, 1.30949563244502, 1.51102381323724, 3.80450723905271, 1.25203873600515, 1.43607143196601, 1.8754429748618
STK16	3	2	1	C5	1.12272069492614, 1.16913690119448, 1.18414011974128
STK10	4	3	1	C1	1.18631683835544, 1.13167565179042, 1.16043780029673, 1.48860233700692
STK10	10	6	4	C5	4.26529904576668, 1.28681388596499, 1.56587266277718, 4.56237584799848, 1.47217339618344, 2.02427681002265, 1.74402983303283, 1.24911914432051, 2.05587660159595, 1.15919325448566
STIP1	8	6	2	C4	1.49924336537427, 1.27361367499056, 1.11794170256551, 1.16345306504274, 1.21014369258177, 1.195946443666, 1.12434151930062, 1.28225335320651
STIP1	5	2	3	C5	1.12579875911158, 1.16076139472136, 1.10740880757766, 1.20227332994519, 1.1542971317512
STIM2	6	4	2	C5	2.48375013639217, 2.97411903075641, 1.27878259527046, 1.21577383054136, 2.68782615770512, 1.68434438194439
STIM1	9	5	4	C5	2.39913544180808, 1.25736633139235, 1.43764049188815, 1.23492754107408, 1.21376653612161, 3.23751755797238, 1.23448569225789, 1.3589185530838, 1.11718709295709
STIL	8	5	3	C4	1.19600129496865, 1.1179533825657, 1.28658831448359, 1.11852115222691, 1.14599161333541, 1.14041337618859, 1.12162651087806, 1.31799790429235
STAU2	4	2	2	C5	1.45865853374504, 1.16823272132395, 1.20803788015677, 1.17126788155978
STAU1	5	3	2	C5	1.48437057778204, 1.26378411864581, 1.17656666775948, 1.29721328465079, 1.16418824230992
STAT6	9	6	3	C5	4.40242131975681, 1.29827420470234, 1.22360344961585, 2.88123447635735, 1.13605881752021, 1.11657363007715, 1.34382481677624, 1.86614268566927, 1.71538659684321
STAT5B	10	6	4	C5	2.85167423395522, 2.84088188332105, 1.32045647797323, 1.45374894670702, 1.35863963255699, 1.17966198278462, 1.55136433601862, 1.20516905394624, 1.31875426402877, 1.134683365867
STAT5A	3	1	2	C5	4.02829210812642, 1.28211490278465, 1.42182202071942
STAT4	10	6	4	C5	6.37050850969492, 1.70447073669073, 1.27404697925081, 2.32303956584162, 1.6827887313022, 1.19501011596211, 1.20208301069115, 2.35185838744903, 1.25963014163069, 1.60615946757339
STAT3	8	5	3	C5	9.25922167653361, 1.84786035996762, 1.49270596847887, 2.15492628521596, 1.58600570355761, 1.27466693015386, 2.07777900558107, 2.15017039013312
STAT2	7	6	1	C5	2.9988969431849, 1.3267733888114, 1.13164547949995, 1.17459536534252, 1.20126330102531, 1.18300178231607, 1.58123335026275
STAT1	4	1	3	C4	1.41667338107826, 1.27805708235364, 1.11284290037389, 1.11785895833802
STAT1	10	7	3	C5	6.81872231221278, 1.61873191554584, 1.49093809548286, 1.36028009347326, 1.93222568044939, 1.34486847594355, 1.38909354983707, 1.70618478046984, 1.40759622175964, 1.77310215311771
STARD7	7	4	3	C5	3.33275810863229, 1.16838919729574, 1.21282209278505, 1.42280745617766, 1.12173854508325, 1.38893117811913, 1.15791122312271
STARD4	6	5	1	C5	6.68637822762772, 3.39826699234605, 1.12715300872869, 1.20121596340335, 1.54899634294683, 1.42514217220473
STARD3	4	3	1	C5	1.85820642715935, 1.40316876805222, 1.29842659119489, 1.24661685127329
STAMBPL1	7	5	2	C5	3.48707206646511, 1.22847812394166, 1.187481966325, 1.22815374009399, 1.17883933810752, 1.17671865404255, 1.57743143891375
STAMBP	3	2	1	C5	1.15124471651768, 1.21461798922208, 1.37422421914594
STAG2	5	3	2	C4	1.22741601007133, 1.19477403758255, 1.21913243146826, 1.11302427303478, 1.20402742037823
STAG2	8	5	3	C5	3.37773497525936, 1.33511693676031, 1.25956204531308, 1.15040010399869, 1.17290413945008, 1.38279057329381, 1.17246700259676, 1.55468808869329
STAG1	9	5	4	C5	2.79677738865324, 1.1832349655847, 1.18974492531432, 1.31946338969605, 1.47967649664088, 1.12721856855078, 1.57672607859851, 1.67082750996821, 1.72034681203127
ST8SIA4	9	7	2	C5	1.93652201998299, 1.29015445089684, 1.1158611510373, 1.96116412726586, 1.1616511590086, 1.48737959980402, 1.19143849283639, 1.17074375956891, 1.23201565510176
ST6GAL1	3	3	0	C5	2.69530922942531, 1.57510633348647, 1.37499302545936
ST3GAL5	5	4	1	C5	3.38298498780061, 1.29636464063263, 1.28364764421982, 1.94667005017364, 1.2949322337006
ST3GAL1	7	4	3	C5	2.18782375417709, 1.65110147301181, 1.18382172198455, 1.13204812064988, 1.20026225253071, 1.40233605300071, 1.32377258468195
ST13	3	3	0	C5	1.20139026966263, 1.52961058033007, 1.57574052645502
SSU72	6	2	4	C5	1.78896466381089, 1.60232722911165, 1.155143798627, 1.53279798709343, 1.4055371988069, 1.11437621175577
SSSCA1	3	1	2	C5	1.37203807536988, 1.68392047091069, 1.1245388313922
SSRP1	15	9	6	C4	1.58685405502642, 1.15825540815535, 1.16442505134795, 1.83308306397575, 1.1060043842864, 1.13359455514881, 1.1800833812542, 1.25592511692575, 1.2474497409704, 1.21812787436223, 1.3500921004124, 1.14709045426848, 1.20534553407786, 1.21882851022882, 1.66828419389271
SSRP1	6	5	1	C5	1.25473918959064, 2.57574829769697, 1.11330886779695, 1.90162182657442, 1.28414755028825, 1.23476400243138
SSR4	4	3	1	C1	1.21502726528549, 1.11561030327863, 1.22065857644756, 1.31247814801675
SSR3	6	5	1	C4	1.34443122066928, 1.11371717287791, 1.21218709213649, 1.1530530567498, 1.15379479651495, 1.15769703489918
SSR3	7	6	1	C5	1.73257961048409, 1.99221529116549, 1.11486035808712, 2.23333294088471, 1.22957574970597, 1.11963402064965, 1.20749440295999
SSR2	5	2	3	C1	1.17606803113937, 1.16763445391709, 1.14192561489327, 1.17567130650416, 1.19319939431724
SSR2	3	3	0	C5	1.80811807736797, 1.3397465884663, 1.15813164893859
SSR1	9	7	2	C5	2.414622661671, 1.65934921132854, 1.2546300735418, 1.20697833039107, 3.93802612499109, 1.29423564449776, 1.2125323944902, 1.76419392893293, 1.36161464784753
SSNA1	4	4	0	C4	1.18802703934454, 1.13634408329131, 1.15911489087466, 1.11985196274565
SSNA1	3	2	1	C5	1.23438055037765, 1.19477222937591, 1.19123555614176
SSH2	9	6	3	C5	2.62600894908537, 3.3758504810956, 1.25295957771198, 1.29030504248618, 2.5548642667908, 1.4010201724748, 1.16494797755442, 1.54851111197119, 1.77552323364175
SSFA2	3	2	1	C5	3.02230091015048, 1.29424924927546, 1.27505683974833
SSBP4	5	4	1	C1	1.2206606309632, 1.19448525464517, 1.15232977156416, 1.24304500314147, 1.18281833674483
SSBP4	4	1	3	C5	2.49728670942193, 1.56030763795412, 1.35673129066635, 1.27718208923615
SSBP3	3	2	1	C1	1.18356292370169, 1.1057068820546, 1.40688670726093
SSBP3	6	5	1	C5	1.77219247238771, 1.22046310450269, 1.40249936851571, 1.29439449490703, 1.38495267186999, 1.11519132326137
SSBP1	9	7	2	C4	1.27323409140031, 1.18335084032443, 1.29480029979468, 1.12228393372567, 1.13274119848651, 1.17093553057701, 1.20198914957187, 1.12119711661911, 1.14585509473137
SSBP1	5	5	0	C5	3.86689578836821, 1.22672938820515, 1.12394487057678, 1.75877509293569, 1.17753631270421
SSB	4	2	2	C4	1.26497759985075, 1.19889832529451, 1.12427789397798, 1.19413673000053
SSB	3	2	1	C5	3.09439678399285, 2.62295451653076, 1.11213212354185
SS18	5	4	1	C5	5.04747061165397, 1.90969805459668, 1.2616811032293, 1.64648604558397, 1.70213009555316
SRSF9	6	5	1	C4	1.36962647456116, 1.17578436699953, 1.32488630651834, 1.38256301509558, 1.14531398759223, 1.15021762255135
SRSF9	3	3	0	C5	2.16363714608992, 1.77131129656086, 1.11286843442935
SRSF8	3	2	1	C5	2.08639874997293, 1.34163978006076, 1.50190357251849
SRSF7	9	5	4	C4	1.56582323635494, 1.59201327152063, 1.5819332477925, 1.21315346483938, 1.51525931427278, 1.15721365261305, 1.38173673609758, 1.19393632726633, 1.14336157873372
SRSF7	10	6	4	C5	11.4155238720819, 1.78787206130797, 1.87049038254691, 1.58403135840473, 2.19464807934258, 1.30362640266794, 1.66663159286994, 1.4472158997427, 1.36014074815674, 1.98995298606648
SRSF6	7	6	1	C5	5.16641654867018, 1.24438649113958, 1.38647817600952, 2.54269839077031, 1.63273063586668, 1.10549574427903, 1.77398837281308
SRSF5	7	5	2	C5	4.56165724518815, 1.23397076221522, 1.37710465656037, 1.2757778743333, 1.26690561785892, 1.62544888659074, 1.12594481750736
SRSF4	6	5	1	C4	1.12460028625618, 1.71992372754445, 1.40403792177196, 1.12195213445053, 1.44925734297815, 1.18831948396368
SRSF4	11	7	4	C5	2.94676890387662, 7.59844147257678, 1.14912897464385, 1.46231694132658, 1.93210249489488, 1.74392995111126, 1.4301983380939, 1.72126844557194, 1.2880833873783, 3.11647978218166, 1.73809815582738
SRSF3	16	9	7	C4	1.79448567694724, 1.42444650774174, 1.37084424533556, 1.27138216561099, 1.73173298877617, 1.35923271997453, 1.61644291224293, 1.57796472341617, 1.42521690755141, 1.23047710377411, 1.24901737186125, 1.13223763028035, 1.13684281352214, 1.11403891171001, 1.14384131440942, 1.40170801632831
SRSF3	6	4	2	C5	4.05277356976374, 1.18409225088235, 1.24970077264081, 1.33005789366644, 1.4337610284776, 1.33881065187416
SRSF2	14	8	6	C4	1.61367938664224, 1.21732987405135, 1.65530312704625, 1.17085050855744, 1.48062188513915, 1.20616115352736, 1.26210641463813, 1.26344446741738, 1.20142563721122, 1.40687587359694, 1.11630714231636, 1.1174557437579, 1.2250988757314, 1.30417142807268
SRSF2	11	8	3	C5	5.71471804332617, 1.4268079904277, 1.67113945213992, 1.50247698839265, 1.29913111194798, 2.89135898693175, 1.76569905656556, 1.34309682044137, 1.85653793109464, 1.1621254563379, 1.38139252364929
SRSF11	3	3	0	C4	1.194208160731, 1.365731184118, 1.1547233129495
SRSF11	12	7	5	C5	9.90965518213112, 2.17657724905848, 2.37138036113384, 2.68338093345497, 5.50566321423455, 2.50921744906373, 1.38785145770234, 1.57106019663889, 1.80861730337053, 3.75000236019654, 3.8405887228747, 1.28993756241805
SRSF10	12	7	5	C4	1.65905402622969, 2.39935230473966, 1.60670757474001, 1.35872414382086, 2.17398062968492, 1.47203158683864, 1.36927389040363, 1.20676664761474, 1.11573821607462, 1.11227875376414, 1.10667175656282, 1.63845563353417
SRSF10	10	6	4	C5	3.42997745561539, 10.1592594454702, 2.31872183565484, 2.36109480702343, 2.02976771751102, 1.77584324435431, 1.14836185064919, 3.69096961444162, 1.60768058250752, 3.29553836985338
SRSF1	5	3	2	C4	1.18685424722584, 1.3521235295537, 1.11056618023733, 1.12871348901511, 1.15594439622184
SRSF1	7	4	3	C5	5.71195633385999, 1.45124992553441, 1.37835568249254, 1.12084598913707, 1.35353868993144, 1.19696751040062, 1.77782018119836
SRRT	4	4	0	C4	1.2978340790261, 1.20021907077656, 1.15336057336152, 1.15373117704231
SRRT	7	4	3	C5	3.53614076099325, 1.5568821197788, 1.31798642002982, 1.19835993682363, 1.23016928983041, 1.30444950989955, 1.13302375457236
SRRM2	13	8	5	C5	8.35875483444537, 1.37786846076572, 1.91338557487144, 2.1684568774663, 2.13748318866255, 1.84874052658863, 2.0467853117052, 2.13962561978369, 1.12221510660549, 2.05113161014314, 3.03356456690776, 2.61023470963177, 1.25787298516545
SRRM1	3	2	1	C4	1.11789684455009, 1.28016887098169, 1.11552778785713
SRRM1	11	8	3	C5	5.64764337092271, 1.48101420484511, 1.50449607413114, 1.33606880131445, 1.40924710879507, 1.46637417116222, 1.64305515997492, 1.55759859589696, 1.76012544040025, 1.43484614449117, 1.66920309077224
SRPRB	4	3	1	C5	2.47859661659975, 1.79239142573203, 1.15603378294726, 1.15806161527142
SRPRA	4	2	2	C5	2.76012476341005, 1.20353698904929, 1.41192806727985, 1.33032143190987
SRPK2	7	4	3	C5	4.36337470710095, 1.43064099006002, 1.3646681116074, 1.32598621540018, 2.00468270266122, 1.30104090052583, 1.45261637148928
SRPK1	4	4	0	C4	1.20090145076234, 1.25224303170909, 1.14159493020762, 1.12804348789361
SRPK1	7	5	2	C5	2.7437788474233, 1.35190200038006, 1.16415960251777, 1.19058749689841, 1.37221714715962, 1.23954859743825, 1.17593631977202
SRP9	11	8	3	C4	1.4431680131048, 1.25123231570187, 1.44143374277081, 1.2688381205456, 1.15519275245716, 1.29348120576546, 1.29679073127528, 1.18110690788037, 1.22358138450203, 1.20114754767902, 1.46107178253777
SRP9	3	3	0	C5	1.6392503041078, 2.27314713057699, 1.50365458636984
SRP72	7	6	1	C4	1.27291332798998, 1.19485841281943, 1.15752976291032, 1.1339507092126, 1.23014174830594, 1.12532502749537, 1.17011446086498
SRP72	5	3	2	C5	1.94175632872239, 1.24863162591773, 1.33726239627585, 1.21813946853083, 1.20306320413034
SRP68	3	2	1	C5	1.22784244877423, 1.10772482686299, 1.15735088683279
SRP54	8	7	1	C4	1.15833695823774, 1.11434916884034, 1.27654906216795, 1.12646541654652, 1.17643317412594, 1.16538259090695, 1.14163777431141, 1.20776919724881
SRP54	8	6	2	C5	3.05345662088159, 1.14277737686613, 1.23111129293575, 1.65132978548496, 1.13585223853511, 1.14240555921785, 1.19708065732916, 1.35789092096566
SRP14	5	4	1	C1	1.124278550812, 1.14845840420533, 1.22641884479429, 1.11949456774472, 1.11406432609096
SRP14	3	1	2	C2	1.13718029511689, 1.16228077193079, 1.13664419608374
SRP14	3	0	3	C3	1.10749505183548, 1.14714011693296, 1.11189700827268
SRM	7	6	1	C4	1.54126730944903, 1.156612586837, 1.19293052419686, 1.27264107365134, 1.23816503455111, 1.10570625300403, 1.18167203482802
SRI	10	7	3	C4	1.7028362166539, 1.12535032750309, 1.14997040285275, 1.16185757332543, 1.17593180850933, 1.14514169779605, 1.1402594617311, 1.1678631704105, 1.17666346793212, 1.16143968368549
SRI	4	4	0	C5	1.40717127258208, 1.36593037199251, 1.14218523411836, 1.75394989979338
SRGN	9	4	5	C1	1.23205292669955, 1.17437151527779, 1.2283742792328, 1.15517360033204, 1.1963605788273, 1.20648631031383, 1.20794025145318, 1.20818312275468, 1.67688208818291
SRGN	5	2	3	C2	1.43058653289863, 1.10960780747334, 1.27295834842209, 1.23965187153015, 1.11651161162118
SRGN	3	3	0	C5	2.0198365230422, 1.75431409422111, 1.13932842369244
SRGAP2C	6	3	3	C5	3.03474609759959, 1.30999851079993, 1.24216978797953, 1.70805471454473, 1.12738364659206, 1.46247056838363
SRGAP2B	4	2	2	C5	1.34913495679893, 1.80449992606242, 1.14878402651769, 1.24425444184512
SRGAP2	5	2	3	C5	3.59295521348822, 1.22131851143834, 1.12456008398678, 2.57789754979134, 1.35821015018782
SRFBP1	6	4	2	C5	1.49535547216711, 1.13577079748042, 1.13448669897947, 1.22110331583793, 1.18258375791717, 1.27701178964344
SREK1IP1	9	5	4	C5	3.15168246310294, 1.22658979478955, 1.67998985205657, 1.17491775836057, 1.99821013166159, 1.36850310608868, 1.12017070671645, 1.1513193693282, 1.24133089142451
SREK1	3	3	0	C4	1.42227674556674, 1.26494814931619, 1.16743634330075
SREK1	13	8	5	C5	7.06235088346285, 15.6219582614404, 1.55996531901326, 2.48220712669844, 2.42695899265243, 4.01537455118444, 2.28947865436492, 1.53272595482117, 1.19558615909701, 2.49756974168509, 2.48349893213943, 4.25204820228662, 1.11882922643494
SREBF2	5	2	3	C5	1.99737960752967, 1.19065442518947, 2.32995080870106, 1.10681489938727, 1.20778212625428
SREBF1	3	1	2	C5	1.26605089952198, 1.12242638529175, 1.38710738618997
SRA1	5	3	2	C4	1.10885428465835, 1.21954313471902, 1.14625933398621, 1.12321501544004, 1.27907062776368
SQSTM1	7	4	3	C5	4.54709713155376, 1.18462210319193, 1.47377151059073, 1.27575937905729, 1.18361398506371, 1.77964347332645, 1.68844877983527
SQOR	6	5	1	C4	1.1656851386391, 1.10864876034449, 1.12430541696917, 1.17732058398642, 1.26642833914312, 1.20642696048178
SQLE	3	2	1	C5	2.4900166569637, 1.10814883144016, 1.25277326378025
SPTY2D1	8	5	3	C5	3.30489807221915, 1.37753106818219, 1.93162125869116, 1.31419398111143, 1.18675843905937, 1.13237681330011, 1.15734929185367, 1.56045546995776
SPTSSA	3	2	1	C4	1.12564110910316, 1.13570296605218, 1.11758733461084
SPTLC2	4	3	1	C5	1.99889422091471, 1.21947850543731, 1.16929299756841, 1.11516956742476
SPTLC1	6	5	1	C5	3.36686555947665, 1.30035873527541, 1.19057921558044, 1.27760972473883, 1.17852426813499, 1.51539742482533
SPTBN1	3	3	0	C4	1.17453180897256, 1.146922511379, 1.18732040191626
SPTBN1	11	4	7	C5	2.82147849397105, 1.36981203704134, 1.34333940347082, 1.17251877208405, 1.21680877400179, 1.39685319691945, 1.42696090264488, 1.81244628194606, 1.54881709492751, 1.1070606231898, 1.9097418889075
SPTAN1	11	7	4	C5	1.82537981954379, 5.70998598533889, 1.36914930734012, 1.48452853249952, 5.95194544073071, 2.00813158563622, 1.28572063029506, 1.53390765461535, 1.51940732564865, 1.96757580733601, 1.17766654948145
SPSB3	7	5	2	C5	3.25046240203808, 1.45499443699492, 1.10932879907428, 1.15954847514644, 1.31844711216519, 1.6848584244001, 1.58612245033381
SPRTN	6	4	2	C5	3.26935404950707, 1.52839597793634, 1.15888163088261, 1.47044781966647, 1.28136654168411, 1.29705054817975
SPPL3	8	4	4	C5	7.54599810054368, 3.11454095091385, 1.2011863067092, 1.32919796364353, 1.19818137073718, 1.1594565573561, 1.40408775009508, 1.11085861432887
SPPL2B	3	1	2	C5	1.35521366091512, 1.38825791092363, 1.27657906931101
SPPL2A	9	7	2	C5	2.14704327400059, 5.78414779912447, 1.11838973518383, 1.65039544633875, 1.33317816360912, 1.38521977422905, 1.2003622649378, 1.45365613964445, 1.86673003517505
SPOPL	4	3	1	C5	3.15768114801749, 1.38535825512368, 1.24025059143962, 1.77349849648713
SPOP	6	4	2	C5	1.78838651811476, 1.19353844128902, 1.2570036152839, 1.15493348274922, 1.20731487783394, 1.32635748497895
SPON2	9	7	2	C1	1.14971856421812, 1.20903947615454, 1.15575115929171, 1.29534578845306, 1.35288950265107, 1.29171208562756, 1.52293609381349, 1.20008721680277, 2.74697839122855
SPOCK2	3	2	1	C2	1.24309398451229, 1.20120508023531, 1.16617707674452
SPOCK2	10	6	4	C5	1.63040556501977, 4.00857103328475, 1.21023945829859, 1.14920031590793, 2.07029396276596, 1.67743003101689, 2.53672643328624, 1.34057214795243, 1.49207500282223, 1.262814976941
SPNS1	5	3	2	C5	1.14680928392362, 1.234175283896, 1.27556524411965, 1.53161100936086, 1.55509918787273
SPN	10	6	4	C5	2.83214459269259, 1.3628913010097, 1.95283105022356, 1.42972882848348, 1.67084170150098, 1.77177728877875, 1.43433468056113, 1.5892885343781, 1.87815086809555, 1.1409548703656
SPINT2	3	3	0	C6	1.69104540352941, 1.35178830773838, 1.20306065589688
SPIDR	4	2	2	C5	1.49334802966514, 1.35198016702069, 1.70109230673856, 1.15507391697875
SPG7	10	6	4	C5	7.41660974208086, 1.2239826455817, 1.74308431311004, 1.49304180405245, 1.31315858752914, 1.4902696472629, 1.13321435198276, 1.3579317606281, 1.19461567931809, 2.43044294202022
SPG21	4	3	1	C5	1.90936711312096, 1.11741269604614, 1.13385492268965, 1.26530370221477
SPG11	7	6	1	C5	5.07084287642074, 1.54313908411739, 1.66343481007632, 1.30540737642992, 1.33542115418729, 1.56806805821585, 1.86918409385749
SPEN	10	6	4	C5	1.98922360739117, 1.97252385728465, 1.44829536837007, 1.44184692236501, 1.73473643915324, 1.31036244915198, 1.16275881067743, 1.61486919044908, 1.2729521925115, 1.9157847508777
SPDL1	6	1	5	C4	1.11686638072435, 1.15389249162308, 1.1113284224964, 1.15890659960579, 1.19738835982016, 1.26248503769697
SPCS3	8	6	2	C4	1.45364723497286, 1.30501036410671, 1.15768702444304, 1.24213975553915, 1.33232563797918, 1.17360766862626, 1.16159077688579, 1.32725985647078
SPCS3	9	5	4	C5	5.40951371342211, 1.180755080871, 1.46970808425333, 2.00642405447197, 1.53544456137289, 1.13888867745114, 1.3495354548108, 1.77633862071711, 1.11038056312031
SPCS2	8	6	2	C4	1.71289138347667, 1.11969842642428, 1.23827182656414, 1.16737977353121, 1.25177707790065, 1.20733192259276, 1.17105686175239, 1.24333457830976
SPCS2	4	3	1	C5	2.29866261179925, 1.37986517186272, 1.35856883539202, 1.17725434482988
SPCS1	3	2	1	C1	1.22699679028935, 1.20831711682817, 1.14129169521077
SPC25	12	6	6	C4	1.25887535303819, 1.43029099368583, 1.12834497774122, 1.19072343032294, 1.14938718341122, 1.14208775769523, 1.54914555375944, 1.32115112575987, 1.16452990579913, 1.31434895077729, 1.35741145911942, 1.55756403113095
SPC24	16	9	7	C4	1.27835726001336, 1.16352665563915, 1.2188463570635, 1.11649474372549, 1.11664150857909, 1.10594209649766, 1.22046807237388, 1.12211720365932, 1.15928995693411, 1.246739577812, 1.21409578225361, 1.26428711836865, 1.16124976584672, 1.14346868600504, 1.22427934531839, 1.55190825799682
SPATS2L	4	2	2	C4	1.21663808599823, 1.1285671341808, 1.12811069478104, 1.19360827162794
SPATA33	3	1	2	C5	1.15267063735401, 1.30837493280048, 1.13355155638836
SPATA13	10	6	4	C5	4.38876388551698, 1.42931060063869, 1.76163929776731, 1.68722118370594, 1.55262776021682, 1.52560424295411, 1.14431321543769, 2.11579597693965, 2.61061527723219, 2.3431131262156
SPAST	4	3	1	C5	1.98924692321333, 1.15118542743973, 1.28985412871904, 1.21763224433514
SPAG9	8	7	1	C5	10.7385245914848, 2.21669004481894, 1.70485568983604, 1.64161144130722, 1.76751993711815, 2.19164265793349, 1.71881910739908, 2.5247683932682
SPAG7	3	2	1	C5	1.67820268063659, 1.73997292428211, 1.18795460416876
SPAG5	4	1	3	C4	1.11248211424033, 1.14578153871032, 1.15305609557522, 1.19851623254905
SP4	5	4	1	C5	2.14112693902522, 1.54586519741437, 1.30633825426883, 1.44152903121934, 1.45156023859275
SP3	9	7	2	C5	4.78254286290374, 1.23507640058009, 1.7370099890062, 2.70942032846663, 1.54247135288806, 1.66816031455219, 1.33292458700484, 1.24341619258784, 2.08612328996895
SP140L	12	7	5	C5	2.40359425451676, 1.42839932437132, 3.04512348464765, 1.57088937037812, 1.67442669152205, 1.38315150783203, 1.55116112891851, 1.17693125836995, 1.29156718757341, 1.79972851119108, 1.11641870792551, 1.80610520693973
SP140	9	6	3	C5	3.29477393151323, 1.1618127764765, 1.80515003014138, 1.28510146540229, 1.21709905519399, 1.11998317326093, 1.11384783046168, 1.40602558913616, 1.11745744213939
SP110	7	3	4	C5	2.7607905225649, 1.36488910077858, 1.24141873675471, 1.1409323783508, 1.45835197903673, 1.14950665781165, 1.32681104298211
SP100	13	7	6	C5	2.21502194769605, 8.67709462343079, 2.07811529251548, 1.42545432739152, 2.15609946494649, 1.92589073380513, 1.60811449300753, 1.12367846098842, 1.32542922352989, 1.19072993115364, 2.68452217241688, 1.145514447952, 2.08314604973628
SP1	3	1	2	C5	1.32183730096552, 1.55513037335788, 1.18172657068614
SOS2	5	4	1	C5	1.96995206645973, 1.19765029059283, 1.14790190231882, 1.43578568689533, 1.29595597335506
SOS1	9	4	5	C5	2.46916167976019, 1.15516073938296, 1.23049108072709, 1.55248100499579, 1.38562311040872, 1.42124670238961, 1.55336679670734, 1.53786318036868, 1.32076966484739
SORL1	10	6	4	C5	3.04763971642295, 1.18129648906184, 1.74342824596778, 1.15033547562643, 1.58275184995224, 1.7123716706816, 1.24982856140152, 1.42553108006613, 1.5433888714451, 1.14464751800278
SON	16	9	7	C5	1.65957839962748, 7.90250708898034, 1.28437818087715, 1.80276152450214, 2.40435136498527, 2.04186679506368, 1.96307631218812, 2.15004699044593, 1.61699462744279, 1.23366199953251, 2.46859088403099, 1.24243271728578, 1.80158597357665, 2.76850986369377, 1.11473975766419, 1.68312562929804
SOD1	8	6	2	C4	1.38661450148465, 1.11553256145821, 1.3466903021226, 1.18146308323746, 1.32423788883742, 1.27877836942763, 1.14340701048033, 1.28221311534104
SOCS4	6	4	2	C5	3.66893394830818, 1.3097773264258, 1.28354721820081, 1.26247340738555, 1.84840391786996, 1.67071759131246
SOCS3	3	3	0	C5	2.06350614853375, 1.39523137808177, 1.17268842312699
SOCS3	3	3	0	C6	1.22209828734773, 2.02718222798042, 1.25053377433825
SOCS1	3	2	1	C6	1.2895666367432, 1.65756264073102, 1.2083276943271
SOAT1	5	4	1	C5	3.97677162378452, 1.34264591041913, 1.1750836150621, 1.21904039752786, 1.23226212797966
SNX6	4	2	2	C5	2.90968402845824, 1.28765740417288, 1.19960036641794, 1.17468463215374
SNX5	3	2	1	C4	1.2081680847083, 1.10799535504507, 1.16473426180331
SNX5	6	4	2	C5	1.57611524464546, 1.34889493135976, 1.38864529404265, 2.18152197264605, 1.13736959610045, 1.37550296951284
SNX3	4	2	2	C1	1.15068358546603, 1.14044033900849, 1.26247482900061, 1.11847289927784
SNX27	3	2	1	C5	1.36426348035096, 1.43853533859784, 1.12538952407029
SNX20	4	3	1	C5	1.30441737066391, 1.78587059236553, 1.1162527471825, 1.24224168036624
SNX2	3	2	1	C5	2.44019875789288, 1.22859335410002, 1.24697404888507
SNX18	4	2	2	C5	1.2166250975503, 1.21113091094827, 1.20318147915634, 1.13571743058744
SNX14	6	4	2	C5	2.56258162614463, 1.44337492979477, 1.1870305759414, 1.26877065998976, 1.34111157321632, 1.3161213060638
SNX13	6	5	1	C5	3.60258754793054, 1.35763460789152, 1.3765740370188, 1.43729746538383, 1.18529657652926, 2.1850993898396
SNX10	3	1	2	C4	1.11251181090231, 1.12804113288331, 1.12887866756752
SNX1	8	5	3	C5	3.50575519279423, 1.24972357327002, 1.1052458421729, 1.53670341990111, 1.30547155805747, 1.17243638173656, 1.4064020018835, 1.67854609351058
SNW1	9	7	2	C5	1.92863484501766, 3.25800201491644, 1.33185624933462, 1.20780842822891, 2.27030234070258, 1.1886744664462, 1.19406436352947, 1.28003008198983, 1.24222990530955
SNUPN	3	3	0	C5	3.23591921169421, 1.34565808194568, 1.24741678331355
SNU13	8	7	1	C4	1.26493552042045, 1.24759493786668, 1.2390212166303, 1.23941013011146, 1.12589851855363, 1.32058389460114, 1.19391331273398, 1.13807026010965
SNRPN	5	3	2	C1	1.17082556387954, 1.15312597174133, 1.15577361337013, 1.15853735359075, 1.17112144290131
SNRPN	3	2	1	C6	1.85141478070466, 1.28142960532491, 1.24441995923616
SNRPG	15	10	5	C4	1.92466504832346, 1.38760722439277, 1.28440856686915, 1.4080220421239, 1.31973279336881, 1.46449756625042, 1.36804529499458, 1.46433467351443, 1.51411055034846, 1.63683681241157, 1.18754202486509, 1.50404249681614, 1.52756152920559, 1.11000789476055, 1.76107151879813
SNRPF	13	10	3	C4	2.15296139108925, 1.34252281576012, 1.31101768769039, 1.63136676368812, 1.25308815085276, 1.35061400731494, 1.3118183002814, 1.48911618845926, 1.5950863524123, 1.52067794453505, 1.30069888724971, 1.39156575290936, 1.62847508979131
SNRPF	3	3	0	C5	1.16260116491484, 1.37485665807187, 1.92633692936151
SNRPE	13	10	3	C4	1.90162181138663, 1.54273236314369, 1.42602087230384, 1.68810438959414, 1.29528855135709, 1.20935345255976, 1.32845417814016, 1.51595362684557, 1.65507618739166, 1.4951573525444, 1.30764762835636, 1.46250456502756, 1.72472708805638
SNRPD3	14	10	4	C4	1.86709169691065, 1.28338642661298, 1.21285200516633, 1.34156862424881, 1.19411760855256, 1.49740628570696, 1.32017467961095, 1.50052442481459, 1.60764882674183, 1.30227628226266, 1.12185900536753, 1.21123934719654, 1.31596121701059, 1.48305402023208
SNRPD3	3	2	1	C5	1.22101846165885, 1.16752646506649, 1.3486354317187
SNRPD2	7	6	1	C4	1.11598427613261, 1.23546269492247, 1.13123972608538, 1.1091922348907, 1.40872693643753, 1.28708535396366, 1.14109651811952
SNRPD1	17	10	7	C4	1.7657452822468, 1.37057148894289, 1.23370691674827, 1.63508817675894, 1.2879766379301, 1.40845011196735, 1.32692734246736, 1.38052003925784, 1.51212624644264, 1.5719192332332, 1.18138195931817, 1.36079983994472, 1.12972799621184, 1.200725429159, 1.41411191291732, 1.21620915809032, 1.68377946273284
SNRPD1	4	3	1	C5	1.32277253029891, 2.41126200360536, 1.19438908159162, 1.11285875436705
SNRPC	8	6	2	C4	1.31867208487578, 1.25049898268787, 1.21475521714309, 1.12719379642088, 1.26936893383586, 1.12384368624366, 1.23225069323525, 1.17622728898937
SNRPC	3	3	0	C5	1.52110196774927, 1.69339655265612, 2.11825372252711
SNRPB2	7	6	1	C4	1.4461800156899, 1.16682860594602, 1.19324805646116, 1.14339649257018, 1.18023312293126, 1.13827219110895, 1.11919890238252
SNRPB	14	10	4	C4	1.85292304424668, 1.27538809687555, 1.40573066144688, 1.6733916507614, 1.39740435735249, 1.60175496211368, 1.3809173944476, 1.55014935899405, 1.77515058649718, 1.55963010621193, 1.53776502428939, 1.10838267733557, 1.50025744616149, 1.66504152866685
SNRPA1	12	9	3	C4	1.73897213921629, 1.14302756129623, 1.36346662939807, 1.22924694285151, 1.18940056882488, 1.22203352367897, 1.35202543318151, 1.3579073389509, 1.35440577462545, 1.2230796819704, 1.25592071940574, 1.52131475167564
SNRPA1	6	4	2	C5	4.13740557100544, 1.70837111407688, 1.13047849001289, 1.3355957264419, 1.49727133820057, 1.34503214829269
SNRPA	5	5	0	C4	1.21743998803405, 1.22151698828896, 1.12810822279749, 1.1066375255404, 1.19770394968331
SNRNP70	5	5	0	C4	1.29827349265735, 1.11479797565966, 1.21890862645847, 1.11053339254795, 1.14237180154297
SNRNP70	9	6	3	C5	2.23388927489489, 4.68732364006216, 1.31468913114755, 1.40470002762664, 1.50637862656621, 1.37795629372906, 1.23471310660247, 1.63660660696411, 1.71387689916499
SNRNP40	12	9	3	C4	1.56730225559324, 1.1206839170245, 1.21882563072257, 1.14883893698904, 1.20002130021017, 1.11831481584181, 1.114644652415, 1.25731767257105, 1.28461203945781, 1.23032029862924, 1.12014680046077, 1.38977717689212
SNRNP40	3	2	1	C5	2.85748711810511, 1.25088708721772, 1.33203619861422
SNRNP35	5	2	3	C5	1.70295251855291, 1.11601959585716, 1.17138156086284, 1.19497426212496, 1.31004048190599
SNRNP27	5	3	2	C5	1.9787497977837, 1.19706728862895, 1.11274272128099, 1.29003416373943, 1.17716306517464
SNRNP25	11	8	3	C4	1.55501723104625, 1.15041855428737, 1.45884727599193, 1.31201098360058, 1.17416143537113, 1.2596147705092, 1.25144821518692, 1.20872480255337, 1.24675746314894, 1.31253654297909, 1.55223335822768
SNRNP200	14	9	5	C5	2.11714651799503, 7.62500162113874, 1.25793684335422, 2.28504196358978, 2.66909751081383, 1.76592539492027, 1.65880248045889, 1.77617907675853, 1.65058108088187, 1.17039351476052, 2.9692152579333, 1.20536919245965, 2.64881776706203, 2.72420495721329
SNRK	8	6	2	C5	2.53936912015843, 5.20975191212437, 1.32999330612416, 1.55439439125767, 1.72473910645202, 1.26034669429437, 1.48601675108033, 1.98476446790059
SNIP1	8	6	2	C5	3.11738493761844, 2.89025660568841, 1.4174064523285, 1.2471206573218, 1.11937499633939, 1.22553521716649, 1.10958322155026, 1.59780832738283
SNHG9	7	4	3	C5	2.04549008537058, 1.26672287812075, 1.12023104097648, 1.21836039680101, 1.76302194743915, 1.23257524409022, 1.31827972172281
SNHG8	3	2	1	C5	1.5938020354857, 1.14257460428601, 1.33892971544758
SNHG8	4	4	0	C6	2.05624048749259, 1.66344532285782, 1.16640803371073, 1.57161856484655
SNHG7	3	1	2	C1	1.13504139582033, 1.13468823376533, 1.30613147398923
SNHG7	4	4	0	C5	3.99806836298263, 1.14562629935783, 1.41880719784618, 1.5500732947185
SNHG25	4	0	4	C5	1.14477756888996, 1.97724667715102, 1.52341343519542, 1.40769367320938
SNHG15	7	5	2	C5	2.27984856408374, 3.00587517981133, 1.12091879530273, 1.12038105566846, 1.11801068094083, 1.4770275385391, 1.14271700214938
SNHG12	5	3	2	C5	1.41340663017343, 1.1836690768564, 1.2555952554027, 1.1128841253732, 1.17078532675138
SNF8	8	7	1	C4	1.30996444187033, 1.1148024100163, 1.21107413285527, 1.17136931591712, 1.18201285007379, 1.24289308996669, 1.18360321820597, 1.13823898182064
SNF8	4	2	2	C5	1.59560614997672, 1.26097271848285, 1.31363995621865, 1.22205202749089
SND1-IT1	3	2	1	C5	1.63565435479926, 1.24795845751374, 1.47690594449297
SNAPC5	3	3	0	C5	1.25656245875382, 2.79325774600213, 1.14395129647393
SNAP47	3	3	0	C5	1.67939225605244, 2.6164959719672, 1.12894568629059
SMYD4	3	1	2	C5	1.58377830218335, 1.47716793514707, 1.24094285555644
SMU1	5	4	1	C5	4.13846582209333, 1.17205296577043, 1.15279856382435, 1.32687619184592, 1.24540928418219
SMS	12	8	4	C4	1.5153036950405, 1.28668728390164, 1.23553087951334, 1.33918877131385, 1.13645750737881, 1.12507090157106, 1.43402836172989, 1.24763650120846, 1.29841432566037, 1.21034513969657, 1.12044000959374, 1.66136801184658
SMPD4	4	1	3	C5	1.20259469553225, 1.2892452380728, 1.18657011592614, 1.17990558069656
SMNDC1	8	4	4	C5	4.90193165200389, 1.20907325662708, 1.33025009340027, 1.23265453852984, 1.12430748616505, 1.54097641277826, 1.10736041737313, 1.35569800388861
SMIM7	7	6	1	C5	4.07041140768763, 1.50235065013363, 1.58941934475466, 1.35362468855352, 1.23421583437982, 1.12752009524496, 1.77470713755571
SMIM26	3	2	1	C1	1.11855310263279, 1.12047326302356, 1.20466618167632
SMIM13	4	3	1	C4	1.20787107402322, 1.14111674658302, 1.11870891234395, 1.12583206706852
SMIM10L1	5	3	2	C5	1.70427277647155, 1.20169809921313, 1.29685405315117, 1.39191789300689, 1.16955285682343
SMG7	8	6	2	C5	3.5474607739055, 1.23235991956487, 1.48845333783971, 1.27690160991709, 2.79326081095574, 1.14837724459413, 2.16105505913442, 1.91662194111864
SMG6	9	6	3	C5	4.28231757116672, 5.90430353025874, 1.64948181182088, 3.25310658472819, 2.0128792135643, 1.51129563164214, 1.33891782285211, 2.52246642308716, 1.92510574937017
SMG1	11	7	4	C5	11.892352817418, 1.45913306100245, 2.21565838570277, 2.09362721636775, 5.39780306500709, 2.66865913395329, 1.45034973282329, 1.78364938240355, 1.65001046423305, 3.43107920986546, 1.959316889397
SMDT1	4	2	2	C2	1.15909583315202, 1.12508917484685, 1.16393153163325, 1.1523527858514
SMCHD1	13	9	4	C5	3.31218882761028, 13.2062405331051, 1.80688973973035, 1.77029952906761, 2.51482225885144, 2.3949802466377, 2.50218206978844, 2.11085348601222, 1.77091920873586, 4.88324227477039, 1.1210664143941, 3.46912322775601, 1.11208782475764
SMC6	3	2	1	C4	1.12814922556483, 1.25748607969426, 1.18873650261812
SMC6	6	4	2	C5	1.84277426252956, 1.16855291382372, 1.19744636989762, 1.13479349386518, 1.5886251880644, 1.45504931627037
SMC5	4	4	0	C4	1.17564078268458, 1.23371965714004, 1.11565742957004, 1.12734270143509
SMC5	11	7	4	C5	2.25300864760437, 4.4412188725877, 1.20467886640032, 1.31942127715264, 1.24433186183949, 1.39839254504867, 1.48660881329721, 1.49559043242935, 1.2499910323, 1.51894507979054, 1.12252151644939
SMC4	16	9	7	C4	1.93315346218861, 1.29177511699923, 2.35853771723401, 1.43012913379571, 1.63811969137497, 1.43633330947625, 1.37658421852105, 1.35546189319401, 1.45741929406104, 1.92981979005402, 1.59918907915784, 1.29824675992306, 1.55734146599158, 1.3253502251822, 1.96750167703951, 2.60467580049034
SMC4	11	7	4	C5	6.9443728077217, 1.60290354612207, 1.71314959232174, 1.41409579077809, 3.83298133365398, 1.66127770978557, 1.33496419089715, 2.52695170169402, 1.28486179921223, 1.83321909131936, 1.64013448802495
SMC3	17	10	7	C4	1.72322347174458, 1.1519857851865, 1.23908657185645, 1.84353733157143, 1.21196216731012, 1.59559402411151, 1.27026315544584, 1.48740552590907, 1.58859213424391, 1.38699458701478, 1.31940576619704, 1.3638758756699, 1.18342334058039, 1.23866994259967, 1.20502252251238, 1.30563733001902, 1.93637480648045
SMC3	7	4	3	C5	2.26055024925497, 1.55685466000647, 1.25399765582934, 1.17268361061934, 1.11684766060333, 1.43032486425003, 1.38875921086216
SMC2	17	10	7	C4	2.27611806341883, 1.43069570985576, 1.3344074427724, 2.83814749824494, 1.56983433547121, 1.57663860867668, 1.36724006815552, 1.43224019677852, 1.69440735960272, 1.52934234716291, 1.473636370765, 1.50837324719074, 1.20468354833877, 1.36795740996916, 1.43112021750138, 1.50302752058967, 3.00264776835663
SMC2	4	2	2	C5	1.25013411885768, 2.78540121284328, 2.0187619707414, 1.3503128409209
SMC1A	15	9	6	C4	1.82146522386888, 1.21063763154017, 1.85693871483387, 1.18023994409365, 1.28109827869412, 1.16656032543295, 1.4231375671139, 1.50790151947307, 1.28569761599117, 1.25863767035649, 1.20288758040401, 1.15024539706159, 1.13480214117784, 1.16351197391811, 1.79609675879837
SMC1A	9	7	2	C5	1.96836673688191, 3.68582394222911, 1.45494176168504, 1.35595441539415, 1.19830869912984, 1.34442937471004, 1.14782561244522, 2.14125478907895, 1.31907248961273
SMARCE1	7	5	2	C5	5.03447960126636, 1.30193916911995, 1.38147803695466, 1.47828498017946, 1.67420599687843, 1.44087142262008, 1.91923636830183
SMARCD2	6	3	3	C5	1.47341084055251, 1.20158194438009, 1.40021360875255, 1.148047373669, 1.2611761847813, 1.36013827921998
SMARCD1	3	3	0	C5	1.77712135916573, 1.11457963193477, 1.49182708248025
SMARCC2	11	7	4	C5	2.04784759850802, 4.23538268049694, 1.28778496275829, 1.24881784105926, 1.22034158288098, 1.33055399873859, 1.16719295829285, 3.43370109545976, 1.11411004158338, 1.35741539628415, 1.26672338576696
SMARCC1	4	3	1	C4	1.38180689987489, 1.34647791183879, 1.1322270183023, 1.12198829476242
SMARCC1	8	6	2	C5	3.23687734111162, 1.3781367499128, 2.13519520891123, 1.38079399730958, 1.15059713248419, 1.13448805139221, 1.20819133891254, 1.54304941404464
SMARCB1	5	4	1	C4	1.17727348889822, 1.11103109975699, 1.23287834936268, 1.17739964944142, 1.19728865031854
SMARCB1	3	2	1	C5	1.28596568697686, 1.13942517896321, 1.12047806208605
SMARCAD1	5	4	1	C5	1.80907278457785, 1.11434836265297, 1.38931407719016, 1.22680530893398, 1.18093098494888
SMARCA5	5	5	0	C4	1.17273128465254, 1.18025392283689, 1.12708087203175, 1.14873570607502, 1.10563461797946
SMARCA5	6	4	2	C5	5.14968202019856, 1.12088105299678, 1.34661022423636, 1.57674591063812, 1.28606964689492, 1.69629899000046
SMARCA4	3	2	1	C4	1.23849551974449, 1.15929480506586, 1.11783347825236
SMARCA4	8	5	3	C5	1.92797308340665, 1.26841168278555, 1.21762358311101, 1.30495700213028, 1.28754552400838, 1.76291322355574, 1.16325637384013, 1.76226058066747
SMARCA2	10	5	5	C5	7.23650263868015, 1.30122146328808, 1.43230740362804, 1.99325949848124, 1.19049798467946, 1.37152708646712, 1.19460070207547, 1.40512541315851, 2.0365307048494, 1.1172916176486
SMAP2	3	2	1	C5	3.86703303042234, 1.1317135814089, 1.20549762410385
SMAP1	5	3	2	C5	2.09592793459593, 1.11206081447524, 1.39771006311605, 1.35392196034439, 1.14118541455866
SMAD5	3	3	0	C5	1.39058555128813, 1.30274594653289, 1.56562599100777
SMAD3	7	4	3	C5	2.93063885682192, 1.11586687282101, 1.4251095625979, 1.19184430670015, 1.12736081832532, 1.35521988627029, 1.91965417823388
SMAD2	6	5	1	C5	2.14350974198457, 1.86276234118457, 1.98894732307848, 1.23298458421678, 1.25998114880902, 1.56124959875739
SLU7	7	5	2	C5	3.03968654450095, 1.41944142960854, 1.17496769379209, 1.35639530011204, 1.12008651125405, 1.38017360943254, 1.25280314774043
SLTM	8	6	2	C5	3.99106629491972, 1.39851863840991, 1.51746056690569, 4.1742460540615, 1.26752780888844, 1.27889197537625, 1.51478297394769, 1.83806018305569
SLMAP	7	5	2	C5	4.35769787031775, 1.69512145534429, 1.54637047893402, 1.59767812563453, 1.50219419703798, 1.36643093834153, 2.26607099930692
SLK	7	5	2	C5	2.86278887293303, 1.31399408433776, 1.14858332820383, 1.21360297167123, 1.2859014462378, 1.24756329317122, 1.33867949546368
SLIRP	12	9	3	C4	1.5423704404532, 1.19254242693374, 1.1542233823345, 1.16436161382301, 1.1718949982752, 1.14387245764355, 1.35054496084503, 1.28161546423368, 1.28403499622556, 1.23543747696932, 1.29095193236171, 1.6260203112347
SLFN5	3	0	3	C2	1.22422662355423, 1.19504262192175, 1.31698016139765
SLFN5	3	0	3	C3	1.27340067770908, 1.27201685642526, 1.13537270943017
SLFN5	12	7	5	C5	4.46237772908464, 3.90166828225977, 1.6764260466947, 1.6909740428454, 1.54572039248692, 1.29839271723335, 1.40203050213883, 1.17276077134665, 1.49841598114658, 1.66509886085667, 1.29309623022437, 2.1989822260901
SLFN13	6	4	2	C5	1.22698827592128, 1.29507796521675, 1.30911757795967, 1.47610316188405, 2.34891020849474, 1.6874328371807
SLFN12L	11	7	4	C5	2.62053017047779, 10.6482253163156, 2.29067061904091, 1.62493998070289, 1.6219199767554, 1.84399359968417, 1.72004595954576, 1.98550396236, 1.8472251359316, 2.45095992952383, 1.19546658033087
SLFN11	3	2	1	C5	1.35459124390201, 1.47021381089506, 1.50001364415958
SLF2	8	5	3	C5	1.91746287861566, 1.33635680028131, 1.75023868274164, 1.22059874270722, 1.2070520003927, 1.24380125658512, 1.38108053204397, 1.71380935202599
SLF1	8	6	2	C5	5.00236338762451, 2.56825447489319, 1.87938157116301, 1.80772222285546, 1.63467598571265, 1.25782204282384, 2.30853296809434, 2.79656372532414
SLCO3A1	8	5	3	C5	5.63422471593284, 1.34845898267495, 1.28569049585081, 1.81148539661444, 2.01452302452339, 2.00935453759781, 1.18969211369043, 1.78714171462245
SLC9A9	7	6	1	C5	1.5556551726918, 1.18212061797962, 1.21959288253456, 1.20926032097417, 1.21353354812785, 1.17925332415986, 1.34445349606063
SLC9A8	7	5	2	C5	1.50968769798362, 1.23758984759655, 1.37961152927347, 1.30440174854304, 1.29638403880612, 1.35518882005723, 1.18242568600125
SLC9A3R1	4	4	0	C4	1.55207482716719, 1.1757903752965, 1.34501152547438, 1.39282450547127
SLC9A3R1	4	2	2	C5	2.29633107032364, 1.2218243730605, 1.14921463155095, 1.12175512124089
SLC7A6OS	8	6	2	C5	2.36814962258907, 1.46937853609419, 1.21800765737788, 1.95384994374261, 1.18928449361383, 1.20580321855035, 1.36028536174807, 1.58827633102266
SLC7A6	4	2	2	C5	1.38249479062987, 1.11064579787469, 1.31029503103202, 1.59734571474446
SLC7A5	3	1	2	C5	1.27772383900123, 1.132046610031, 1.21030252289892
SLC6A6	4	2	2	C5	1.34385540264724, 1.35765454144816, 1.80041775461105, 1.22587743695722
SLC5A3	12	6	6	C5	4.42297501534478, 1.24947986030828, 1.31520461682599, 1.29540309663927, 2.129265085134, 1.28156563224165, 1.1254721305856, 1.3230443929942, 1.6905853754959, 1.5457106219348, 1.20145031673458, 1.76094102020539
SLC50A1	4	4	0	C5	1.41492958276329, 1.32617350765181, 1.25194965788708, 1.22943187930533
SLC4A7	12	7	5	C5	8.13080634710483, 1.29053079732548, 2.42664739239704, 2.17538156073781, 2.63789768858479, 2.08230345481275, 1.77780026890362, 2.46778185992293, 1.36069415278104, 1.2180173866057, 3.24302286056067, 1.76095943122723
SLC46A3	3	2	1	C5	1.60023978681058, 1.20562442683038, 1.14654067826207
SLC44A2	7	3	4	C5	1.20591609333196, 1.25769271744, 1.10895093975508, 1.1083077413414, 1.19390978133093, 1.31918248299537, 2.09861639202851
SLC3A2	3	1	2	C4	1.12554420486914, 1.1505575778333, 1.12275463756354
SLC3A2	7	6	1	C5	1.83455372701681, 1.14044812082415, 1.67805190269544, 1.11782409596751, 2.36015659644493, 1.17959841478141, 2.5279999901751
SLC39A7	4	2	2	C5	3.0465294220316, 1.33843812069462, 1.34093967300337, 1.19132295224386
SLC39A6	4	2	2	C5	1.17502278297096, 2.90904497676971, 1.45123504188109, 1.18998053935885
SLC39A10	11	8	3	C5	3.77897258965533, 1.31784869864196, 1.48745516365176, 2.31931894584134, 1.31089457129562, 4.45416416080733, 1.66988569918468, 1.40694164720162, 1.31845125075846, 1.39378934506301, 1.66105558674767
SLC38A2	11	7	4	C5	8.89425868713833, 1.25141325862645, 1.57802138628877, 1.57199382624843, 2.24121890747962, 1.89247547964445, 1.25099215655781, 1.11000905685936, 1.79398480254029, 1.53465970555615, 2.36510668293131
SLC38A10	5	2	3	C5	1.45997284075248, 1.11680239252006, 1.46517649934535, 1.19594590440646, 1.28133067303509
SLC38A1	9	6	3	C5	1.70402185450484, 7.79069892888432, 1.76443872014578, 1.73477208651279, 2.03650331614302, 1.41307980617044, 1.93567039450127, 2.66384215043995, 1.16389167429324
SLC35E3	4	2	2	C5	1.27049355072565, 1.26967162167644, 1.53722611332856, 1.3327013957273
SLC35E2A	6	4	2	C5	1.63313471156857, 1.3355587040601, 1.6598845794872, 1.23073503903209, 1.15191877242674, 1.13244008601381
SLC35E1	4	2	2	C5	1.15863198554254, 1.68899009746587, 1.27677607794293, 1.28333309216808
SLC35C2	4	3	1	C5	1.68263382508231, 1.16508505748602, 1.25900832735037, 1.28669083393065
SLC35B1	4	3	1	C4	1.2377462459358, 1.17839752088368, 1.12145558830609, 1.16339177158794
SLC35B1	3	1	2	C5	3.1911220613558, 1.1765884257651, 1.13994295161004
SLC35A3	8	5	3	C5	6.02690756795309, 1.2868802909666, 1.35186070660443, 1.32301436537313, 1.3171960125851, 1.97553180122407, 1.25128440841018, 1.72745164217301
SLC33A1	5	3	2	C5	3.52880517667769, 1.41074249726283, 1.33893607614253, 1.11197082313681, 1.32243314563976
SLC30A9	4	1	3	C5	1.31836978222653, 1.17481576217905, 1.145718892674, 1.21683517771931
SLC30A7	6	5	1	C5	2.15176375057429, 1.36225145286775, 1.20748979952063, 1.22073498699486, 1.19975832866858, 1.76444276431415
SLC30A5	4	3	1	C5	2.00667208237629, 1.11528343811226, 1.14287626084583, 1.29544448938657
SLC2A4RG	5	3	2	C5	1.78383094268523, 1.91740421832968, 1.14025717394798, 1.41170326440145, 1.16094633628903
SLC2A3	12	7	5	C5	9.06958270812289, 1.23949432274457, 1.64979013001786, 1.48211119086184, 2.75297192247038, 1.77521458820348, 1.70562486245062, 1.10639576224059, 2.20761781462805, 1.18324991558045, 1.89875011052596, 1.13816749296763
SLC27A2	3	2	1	C4	1.11995559276082, 1.1224911547667, 1.16913523090381
SLC25A6	4	4	0	C2	1.17718633871264, 1.14399023261295, 1.17169662498491, 1.141938669325
SLC25A5	17	10	7	C4	2.26249907226944, 1.49643205275153, 1.48892396492845, 1.50405522600046, 1.27749810506473, 1.63893316868139, 1.44424975286082, 1.63342384821703, 2.17771549327501, 1.72538965637479, 1.22860545799496, 1.50763922440727, 1.15444023672569, 1.27393411596723, 1.48732863892605, 1.31586168382461, 1.61534542307664
SLC25A46	3	2	1	C5	1.66215314119979, 1.10871374660644, 1.21909029546158
SLC25A45	6	2	4	C5	1.39169335369737, 1.27004393701266, 1.30010689812836, 1.19386850122139, 1.72355883135547, 1.62275796231449
SLC25A42	7	5	2	C5	4.98880549361389, 1.23941595684214, 1.53105212108626, 1.19652334453364, 1.20422274326835, 1.38271410424729, 1.49303501494492
SLC25A4	3	2	1	C5	2.24531467436353, 1.36329155811559, 1.31037852700694
SLC25A39	5	3	2	C5	2.15858843189839, 1.23816976250269, 1.36706225708664, 1.14063049585497, 1.12999850211237
SLC25A38	4	1	3	C5	1.70104574805582, 1.10638617893164, 1.12123636264403, 1.19352746820591
SLC25A36	10	6	4	C5	5.75976007361341, 1.14508444036978, 1.40514553830049, 1.45373835707203, 2.01740360471784, 1.56082147497797, 1.11747774899007, 1.57052635709968, 1.43086520369905, 2.01500920312596
SLC25A32	3	2	1	C5	3.59131679159734, 1.20758348560563, 1.19193978682747
SLC25A3	11	9	2	C4	1.49928755884063, 1.13195187855556, 1.23336168086642, 1.20688848367447, 1.38684942295351, 1.22911937051079, 1.30700174782567, 1.37689027314986, 1.26103967358822, 1.11893774867684, 1.25293280303093
SLC25A3	5	3	2	C5	4.44719907757459, 1.16619455298369, 1.11794853567577, 1.38391275433737, 1.15001846117177
SLC25A28	4	3	1	C5	2.08743856401876, 1.22031418418868, 1.19692068950934, 1.22099929525312
SLC25A26	4	2	2	C5	1.83989989854545, 1.13340490166737, 1.19517183098013, 1.14781658661681
SLC25A12	4	2	2	C5	2.48701651242826, 1.23384123115838, 1.28547815332806, 1.22815328168693
SLC25A11	7	5	2	C4	1.21524090759872, 1.14057445973541, 1.10640735139649, 1.1214380448633, 1.18424293164166, 1.10997852786307, 1.20722067488699
SLC20A2	4	3	1	C5	1.78742495070679, 1.31184889582641, 1.16424943089892, 1.19997257955946
SLC20A1	3	2	1	C4	1.51296366249962, 1.45132930458658, 1.11117976278905
SLC20A1	12	8	4	C5	4.39189283023456, 5.67765439409548, 1.66528504785329, 1.84672831578127, 1.50076041473109, 5.98618321754412, 2.05402380447288, 1.56876250949336, 1.19659149621865, 3.52535159690835, 1.51808555161765, 1.8687153582613
SLC1A4	5	2	3	C4	1.20400356908725, 1.13427831024138, 1.16708830087766, 1.16285399216135, 1.14507704917297
SLC1A4	3	3	0	C5	3.32607721926777, 1.21139905869072, 1.219743761933
SLC16A7	5	4	1	C5	2.73915590660324, 1.23273353764279, 2.32808143955516, 1.11989878886373, 1.27719764817164
SLC16A1-AS1	4	1	3	C5	1.5037136841344, 1.14415181393827, 2.28275566898578, 1.24141364610837
SLC16A1	3	2	1	C5	2.13004660357022, 1.32508151562531, 1.25026986697935
SLC15A4	6	4	2	C5	3.34452790613997, 1.18138768977471, 1.18011853965384, 1.36172384274974, 1.13460265550373, 1.38710263258509
SLC12A9	5	4	1	C5	2.07265315095959, 1.25949328704145, 3.14389791514594, 1.18821927212356, 1.20593643106969
SLC12A6	4	2	2	C5	1.20006811181845, 1.43001503815002, 1.33492800478501, 1.83433762925483
SLC12A2	4	3	1	C5	2.08652941701892, 1.32546226335625, 1.54271314626954, 1.16645678036961
SLBP	14	10	4	C4	2.41479532598545, 1.34435234433544, 1.27347194217742, 2.0134933396818, 1.45260714083628, 1.83196706923581, 1.36483387274744, 1.66158444645719, 1.37270591626312, 1.62374806114999, 1.13695064093403, 1.77073767636567, 1.38521101977018, 1.4521087908301
SLBP	4	4	0	C5	1.5799332804608, 1.28172541379993, 1.39849944521204, 1.20912806178145
SLAMF7	9	6	3	C5	2.31135360675525, 1.25744286086034, 1.64802864830419, 1.26018010228715, 1.17216278326633, 1.3933440275079, 1.25743414516645, 1.73772885457614, 1.12502241608608
SLAMF6	6	3	3	C5	1.28224537564512, 1.37388177536715, 1.22456287677899, 1.27851958693893, 1.27360400989587, 1.35342770534903
SLAIN2	3	2	1	C5	1.36434327384158, 1.16965863598681, 1.19658871932927
SLA2	5	3	2	C5	5.60537445778325, 1.35037144360523, 1.22913320116183, 1.13983923870214, 1.23670823055988
SLA	9	6	3	C5	6.68641202646283, 1.14343183176091, 3.16206314294876, 1.15219227245565, 1.54307433386548, 1.44921129726688, 1.11652690819111, 1.54056634082202, 1.35972061794684
SKP1	5	4	1	C5	3.38585013990355, 1.44534806782663, 1.10542456503959, 1.85711231716647, 1.12473041223105
SKIL	3	2	1	C5	1.41365222140561, 1.49847336783456, 1.38838691449969
SKI	4	3	1	C5	1.11160909035093, 1.46045182388086, 1.24775453833095, 1.51662821209251
SKAP1	4	2	2	C1	1.31324331050801, 1.20845294808651, 1.12071190587876, 1.31538002263854
SKAP1	5	4	1	C5	3.22051056147964, 1.14134773940838, 1.12672094883192, 1.11511386941796, 1.1898212366364
SKA3	10	5	5	C4	1.25810897855393, 1.24755623346902, 1.13620007940737, 1.1468001486331, 1.13273364081247, 1.28375873207911, 1.25268866557811, 1.16545060552203, 1.19273993006265, 1.48177059375896
SKA2	15	9	6	C4	1.51052405990886, 1.32014324431405, 1.12966924156067, 1.24152416025894, 1.37048176199224, 1.16613217923189, 1.4961902074457, 1.37121233327451, 1.17341820090825, 1.27379843235279, 1.13537162902872, 1.21042852654998, 1.2411925500067, 1.25771200142164, 1.66435536248341
SKA1	8	3	5	C4	1.32962567897956, 1.15126844657889, 1.14443392252153, 1.1543962025418, 1.14952626088664, 1.13367293583783, 1.16126784802677, 1.36076370637833
SIVA1	14	10	4	C4	1.95096473495445, 1.24693122143707, 1.130372987912, 2.07085154380445, 1.39645428513914, 1.4970575012677, 1.30010656357468, 1.46537033972572, 1.54703184332409, 1.49499579671904, 1.11734605504005, 1.52556681860717, 1.46068243559143, 1.94928003765631
SIVA1	3	3	0	C5	1.37348333267442, 1.23514807480946, 1.27952708946759
SIT1	3	3	0	C4	1.12802768489421, 1.17255297011755, 1.10637757895727
SIT1	5	4	1	C5	1.22307166150128, 1.2791110825272, 1.11152023627452, 1.26028994868432, 1.30437640846487
SIRT7	3	2	1	C1	1.26593987486598, 1.10854445654574, 1.23460239298146
SIRT7	7	5	2	C5	5.4038266988662, 1.51757759877188, 1.62747548621201, 1.50286071325501, 2.10044129948413, 1.20250783041196, 2.00027799621182
SIRT6	3	2	1	C5	1.13445760674925, 1.34261303028563, 1.14630141135248
SIRT2	5	3	2	C5	4.05147043373764, 1.15551712363721, 1.36647196990113, 1.72043867734619, 1.43203768869752
SIPA1L1	8	6	2	C5	3.10496878323326, 1.90879248233197, 1.17896401908889, 1.20623243948603, 2.73921694430967, 1.23694634902364, 1.370479757093, 1.59186439216536
SIPA1	3	2	1	C1	1.25398151196073, 1.25971673834739, 1.19039995404798
SIPA1	9	5	4	C5	2.89530517527587, 1.40668312976727, 1.26870546774208, 1.42357811020953, 1.26188568466712, 1.20222777836007, 1.83533166926664, 1.24418864439584, 1.83230082616148
SINHCAF	6	5	1	C5	1.48284067829878, 1.38333923052251, 1.18879826220294, 1.11419792573894, 1.14579011892281, 1.27274259433375
SIN3A	3	2	1	C4	1.2301680715863, 1.37421031943574, 1.12615547848251
SIN3A	6	4	2	C5	4.46257333189637, 1.55190076065997, 1.44212569843444, 1.65560902952297, 1.75928700788022, 1.99416292084186
SIK3	6	4	2	C5	4.96074334527376, 1.4935495896787, 1.58002825258576, 1.20972927052593, 1.59182537448513, 2.36296989050923
SIGIRR	3	2	1	C1	1.22595000767245, 1.24056757398725, 1.4063584905743
SIGIRR	10	7	3	C5	3.71222817964637, 1.21469646829903, 1.54876559600013, 1.33819053728957, 2.38410844865575, 1.37175700017693, 1.32428557448216, 1.2671321926434, 1.46862754855289, 1.72555833033796
SIAH2	10	7	3	C5	5.43810047542894, 1.16591470889229, 1.13273429313242, 1.17555772439878, 2.08800956690501, 2.0078696242099, 1.3180060216268, 1.60849637744974, 1.16672205654527, 1.42699450038384
SHPRH	8	7	1	C5	2.55765527108941, 3.82896528328288, 1.32752439859925, 1.67222792018108, 1.3521787086818, 1.36022153993736, 1.32441243761619, 1.84227410262956
SHOC2	10	8	2	C5	2.29500745570142, 2.64281675058522, 1.1909405516819, 1.29059609493199, 1.65801396135359, 1.28848217698741, 1.63124914624157, 1.50847137957638, 2.24333764326572, 1.68939094038846
SHMT2	8	4	4	C4	1.17325877832055, 1.12444757998144, 1.24989852064373, 1.12690239631512, 1.24865139827544, 1.15002636862654, 1.1883255786285, 1.16036174143143
SHMT1	3	1	2	C4	1.11496018504258, 1.16113043675933, 1.2569542902191
SHLD2	5	4	1	C5	2.68729056698572, 1.92298030420648, 1.25863777970701, 1.16027343790402, 1.498077251676
SHKBP1	6	4	2	C5	1.83362942145689, 1.15343537842054, 1.83232378242614, 1.17803797033494, 1.45065612808745, 1.17615079089591
SHISAL2A	3	3	0	C5	1.84690108903307, 1.1926154456694, 1.35077233201932
SHISA5	4	2	2	C5	1.50776397328136, 1.22311339970382, 1.31791385837535, 1.16828653405219
SHCBP1	14	8	6	C4	1.31041747110308, 1.22609135889438, 1.39777407214166, 1.12815117323103, 1.15855442045642, 1.135953335755, 1.21778052547974, 1.11701139533926, 1.18107542048098, 1.20703469995044, 1.16868455539657, 1.20152659355798, 1.21826406161535, 1.55215225353268
SHARPIN	3	2	1	C5	2.47164015976065, 1.11554628365769, 1.21364408622469
SH3KBP1	3	3	0	C4	1.13247400941258, 1.56064041487955, 1.13500986074194
SH3KBP1	9	7	2	C5	1.50602087473947, 2.91231756580832, 1.51240623589431, 1.45974197680338, 1.21174677057697, 1.22291816378989, 1.12615963747988, 1.90767280231169, 1.34260856871438
SH3GLB2	3	2	1	C4	1.23899462699549, 1.29988211550876, 1.22524544541421
SH3GLB2	3	2	1	C5	1.16498967346919, 1.2133477225406, 1.32714368660463
SH3GLB1	8	6	2	C5	3.48289606440442, 1.29832330417648, 1.36765139488015, 1.17087876707395, 1.93427558514775, 1.37726550261974, 1.2891125770003, 1.23216256938757
SH3BP5	6	4	2	C5	1.63594319632967, 1.5202121716199, 1.84274519371926, 1.16489978236838, 1.13260639987963, 1.15548698448013
SH3BP2	7	4	3	C5	2.28833341614646, 1.81979679215286, 1.43466046466532, 1.31414655287889, 1.18574331216242, 1.35226813916944, 1.26029108268976
SH3BP1	5	2	3	C5	1.71972058367763, 1.26789491224154, 1.42296927129218, 1.10845203666366, 1.21264509540835
SH3BGRL3	14	9	5	C1	1.2815909172142, 1.32837524912984, 1.18272861409231, 1.20100280279393, 1.24686720724352, 1.42117876029593, 1.75818096565632, 1.70093291979553, 1.2847729312355, 1.31441480509822, 1.27545851419744, 1.21352042110554, 1.21560045043573, 1.63346131105474
SH3BGRL3	3	0	3	C3	1.25022958653855, 1.18126098512113, 1.20617080666792
SH3BGRL	10	8	2	C1	1.177335825211, 1.11017663221355, 1.2370770172514, 1.31027180905274, 1.12958328589313, 1.41877673634249, 1.22531732413108, 1.11926552547492, 1.1522705060107, 1.13620938264667
SH2D2A	3	2	1	C5	2.52055361168749, 1.11386107195439, 1.19997993062224
SH2D1A	4	1	3	C2	1.15014048117896, 1.12562270583156, 1.15046562301694, 1.52977362742628
SH2D1A	9	8	1	C4	1.2619881496422, 1.16178754036972, 1.32473865962101, 1.13391643620853, 1.12837731020514, 1.29031883379849, 1.27866701885572, 1.1479944995094, 1.38082127484115
SH2D1A	6	4	2	C5	4.66092710816549, 1.16944141240423, 1.66098560706852, 1.30703653113789, 1.3392683367479, 2.36196831694553
SGTB	5	4	1	C5	2.45774777727005, 1.34994357754433, 1.21849071658915, 1.1974797990089, 1.47622269192213
SGTA	4	3	1	C5	1.26851778833784, 1.13150763920317, 1.17969221963249, 1.28434202418875
SGO2	12	7	5	C4	1.23063391271347, 1.14156882669719, 1.17200843728328, 1.14675347764915, 1.13300929193003, 1.11097419123968, 1.15000331571027, 1.21665013235767, 1.2278778038256, 1.19831690846419, 1.2134063458126, 1.57082207325945
SGO1	10	5	5	C4	1.17746459831071, 1.19324344438223, 1.11270834451331, 1.11196916294545, 1.11397575639351, 1.20942830695056, 1.17357957813779, 1.26162812683664, 1.19086933546417, 1.29349760064979
SGK1	3	3	0	C6	1.72609490117141, 1.27985861546764, 1.84254505552808
SFXN1	4	3	1	C4	1.4029882978466, 1.23296338532364, 1.13721074679565, 1.15273933389339
SFXN1	7	5	2	C5	7.84313767538464, 1.16232378748307, 1.52175174233468, 1.4927284730174, 1.44912435214081, 2.1007666382206, 1.82950027363988
SFT2D2	10	6	4	C5	8.92337783792865, 2.34978296891944, 1.49885938600101, 3.74247731337972, 1.54712611175267, 1.65185964158633, 1.10836706175349, 1.40821618303246, 1.3193078843316, 1.97546594685422
SFSWAP	9	7	2	C5	5.11095894949746, 4.04446282704718, 1.42041605771026, 1.2319273156223, 1.83861110421571, 1.56662827555332, 1.22148140836904, 1.6798982415494, 1.34759763232377
SFPQ	4	4	0	C4	1.17789607730025, 1.39270702016723, 1.14595163762933, 1.13975260481257
SFPQ	14	8	6	C5	3.00342468347375, 13.7765610622523, 1.37756008860048, 2.03560590153194, 2.74165214085602, 3.69217322408105, 2.61008764950592, 1.86338911158102, 1.16575497769525, 2.06663989910644, 1.21502492884163, 1.67052857984803, 4.03316696249453, 1.13788479733846
SFMBT2	6	4	2	C5	4.60528354414653, 1.44653932505413, 1.50884101827818, 1.25887982230727, 1.22627053459857, 2.56891034504234
SFI1	10	7	3	C5	5.15300229902387, 1.6319013807437, 1.97914577002653, 1.64116404837906, 2.78815456660319, 1.53008391911704, 1.79633106553987, 1.12063041783878, 1.34037521183325, 2.45955616207508
SF3B6	11	10	1	C4	1.17739007609424, 1.18204810894301, 1.11143353659181, 1.20515650409644, 1.11402574440293, 1.17268917291612, 1.13025571223185, 1.15312834969198, 1.36867368846899, 1.18301230702886, 1.17357537506529
SF3B6	5	4	1	C5	1.35695696936976, 1.17944606249497, 1.12817800237384, 1.20814831349419, 1.13965072548912
SF3B5	5	5	0	C4	1.13333324595953, 1.20958610819719, 1.15830696597671, 1.12716751903923, 1.12157856407276
SF3B3	3	2	1	C4	1.2427903191388, 1.17163422965947, 1.22506727734364
SF3B3	8	6	2	C5	1.93066993424926, 1.34675642000655, 1.33737950152795, 1.11922573227658, 1.23662812741462, 1.25663527549479, 1.69630918534121, 1.26887837534292
SF3B2	4	3	1	C4	1.43465203346072, 1.29088371785778, 1.10529346415561, 1.1201462160375
SF3B2	10	8	2	C5	5.03840307084748, 1.21973337575475, 1.54966968502919, 2.18263722146545, 1.34792695443386, 2.80104782220566, 1.73373221090645, 1.38077904294561, 1.45794712649144, 1.36876468803428
SF3B1	12	8	4	C5	1.91645486381205, 6.08799224999784, 1.46784653973472, 1.88689336465616, 1.84008982630681, 2.43379987231341, 1.56098950265336, 1.25337495513319, 1.58794928890883, 1.28673050043724, 2.28628574242307, 1.5803277451433
SF3A3	7	6	1	C4	1.2325807364595, 1.29927054810108, 1.11519910235457, 1.11078084757729, 1.10825405891006, 1.1922570386355, 1.153673852157
SF3A3	5	3	2	C5	1.44480971293821, 1.13978009899647, 2.18622556864113, 1.11038143685432, 1.19391848708233
SF3A2	3	2	1	C5	1.76237218088124, 1.17449430691381, 1.3634181906868
SF3A1	5	4	1	C5	1.72896092100727, 1.1172079903028, 2.72834052667178, 1.35587243321648, 1.32226861071982
SF1	14	8	6	C5	12.0064597745972, 1.20743548661831, 2.30083294004327, 2.41849776365196, 1.94052320185149, 3.30510515984775, 2.9597572673059, 1.64399956652987, 1.10658498615056, 1.60650478537051, 1.5834121310326, 2.49480157240647, 1.12565234900136, 1.69463112408753
SETX	9	6	3	C5	4.96800293338426, 1.34527434164302, 1.41911776627422, 2.58877204154939, 1.7275923941754, 1.24407802471014, 1.42123917990969, 1.21737056361413, 2.15929623072445
SETDB2	4	3	1	C5	3.41931795130132, 1.28667480428341, 1.46028564451208, 1.33392203179849
SETDB1	3	1	2	C5	1.61514549034564, 1.36863715166664, 1.13293637214722
SETD5	9	5	4	C5	2.51158175044738, 1.44128509126987, 1.30675041064114, 1.32407799744896, 1.14906595514773, 1.11664304710441, 1.11697654477119, 1.76843788832, 1.58793509375471
SETD2	12	8	4	C5	2.30668876146677, 4.64847505266597, 1.1708852728582, 1.65657521384197, 1.96190589911254, 3.85004952317297, 2.38500547975995, 1.79211540564994, 1.12739685322748, 1.94914569985875, 1.23956875191699, 3.34658595234807
SETD1B	3	1	2	C5	1.10568795543633, 1.36804202028712, 1.29814792157193
SET	17	10	7	C4	1.6519749610955, 1.15523838268239, 1.26024312328061, 1.40554577409799, 1.12155349014438, 1.48336179825233, 1.27597347675998, 1.30863047302005, 1.38891665741226, 1.25444161302906, 1.24708291109831, 1.27121051549894, 1.2699317223342, 1.31462764108859, 1.39224705449919, 1.31990599531109, 1.47013350611868
SESTD1	4	3	1	C5	1.36165851275024, 1.37608635275881, 1.29256789664533, 1.60118274342477
SERTAD3	3	3	0	C5	1.42536851381531, 1.19203440874536, 1.15718851326803
SERTAD2	4	2	2	C5	1.45957150462108, 1.22697542136452, 1.1630522492552, 1.25427689716727
SERTAD1	4	4	0	C5	1.202877143214, 1.12244438186808, 2.17365064413769, 1.21025413501452
SERPINB9	8	6	2	C5	8.05121958049162, 1.67610715436099, 1.29966887052442, 1.91928439418303, 1.40674616790446, 1.32212797794326, 1.66866092531527, 1.53268909217486
SERPINB6	5	4	1	C5	2.6013677287324, 1.89026022287089, 1.11117641779096, 1.34727618612449, 1.23368554952993
SERPINB1	5	3	2	C1	1.17653387474675, 1.2318834981568, 1.10780068229135, 1.11305680816074, 1.28435934596979
SERPINB1	3	1	2	C5	2.11367184259382, 1.22500137259869, 1.18629577121273
SERP1	4	3	1	C5	2.67474523717018, 1.33955254836004, 1.13819764474402, 2.60901074672729
SERP1	3	3	0	C6	1.65019790581317, 1.41241227727442, 1.29206322492243
SERINC3	7	5	2	C5	4.45743624351446, 1.40957185400738, 2.58573505123607, 1.34445097789364, 1.23480073571743, 1.41403278644216, 1.80633653792346
SERINC1	6	4	2	C5	4.79517841232271, 1.33774326267308, 1.27108620392845, 1.56646260716847, 1.53934768543913, 1.75242324496872
SERF2	4	3	1	C1	1.14686619385906, 1.15789647556789, 1.38307274114912, 1.1892742409818
SERF2	3	1	2	C5	2.27469197126659, 1.2473773709115, 1.36351262996348
SERBP1	13	9	4	C4	1.67811350218584, 1.26190686633134, 1.42048665463918, 1.18976948236627, 1.32620658208964, 1.23107743805726, 1.44335242469604, 1.36384347583997, 1.37358335326254, 1.27320065332966, 1.12031346713213, 1.26265960810727, 1.51587963019976
SERBP1	7	6	1	C5	4.6707262310374, 1.18876155509156, 1.62019358468019, 1.21868372263088, 1.20787488269695, 1.23791685171659, 1.14696845999674
SEPHS2	4	2	2	C5	1.26532916894452, 2.68913561324985, 1.68894929730449, 1.13283528173075
SEPHS1	4	3	1	C4	1.21043860072556, 1.23462433021484, 1.13782573854941, 1.27721664844802
SEPHS1	3	2	1	C5	1.30877880266297, 1.32735409109853, 1.17456402815143
SENP7	7	5	2	C5	4.67376340107324, 1.67188702392162, 1.3573394238596, 1.4416266193522, 1.13856070994459, 1.27783953345219, 1.7673118865758
SENP6	8	6	2	C5	3.60142324402884, 1.51421857535688, 2.22923574450742, 1.48608328024014, 1.53161589467711, 1.79676983368606, 1.51577602671591, 1.13975861507793
SENP5	7	5	2	C5	3.38106018761131, 1.1633490426561, 1.4132652704207, 1.28740921646392, 1.47991760710548, 1.30383515931396, 1.65049448757086
SENP2	6	4	2	C5	4.37481861597351, 1.2361183451663, 2.90685088628196, 1.42629026161422, 1.32628607485083, 1.39748082184241
SENP1	3	2	1	C5	1.87479251511034, 1.22098478436608, 1.16826289715595
SEMA4D	11	6	5	C5	5.06971703929126, 1.80298735127974, 3.2336935684932, 1.53128097478921, 1.69821898302429, 1.34686150297358, 1.20050412865759, 1.49956623751596, 1.91220036859434, 1.192800410185, 2.15341552865992
SEM1	14	11	3	C4	2.04705589178193, 1.35113139397657, 1.35080691522568, 1.52615594078997, 1.47430148699823, 1.15175656176052, 1.44228297138264, 1.25506510830737, 1.4775359179646, 1.78067250214239, 1.47424147743447, 1.15554980872461, 1.25423042190052, 1.84681504998477
SELPLG	9	5	4	C5	1.74480311094936, 1.21256996996366, 1.13188956005653, 1.31694710502664, 1.46785636224692, 1.153435288473, 2.68692268602059, 1.28372547736333, 1.22284889963689
SELL	8	4	4	C2	1.145279387414, 1.16854041662122, 1.29566439164635, 1.46416963794318, 1.181560711923, 1.19192157304299, 1.15140725486861, 1.27918717579832
SELL	3	2	1	C5	1.24097696782864, 1.11092299093107, 1.17979084361693
SELL	3	2	1	C6	1.16190523507308, 1.76526974506732, 1.45703770424454
SELENOW	3	3	0	C1	1.11747132887695, 1.12996587103758, 1.23177482847982
SELENOW	4	3	1	C4	1.3252664274344, 1.17814284463401, 1.26502804006773, 1.12745890245149
SELENOT	3	3	0	C5	1.43363649029827, 1.16060842817398, 1.40266533338188
SELENOS	3	3	0	C5	3.06403675948797, 1.11891159692227, 1.19602397576425
SELENOK	3	3	0	C5	1.55329913517715, 1.59834357015775, 1.11877934152245
SELENOK	4	3	1	C6	1.14624933171409, 1.3246966291709, 1.11948869497034, 1.27355494466482
[truncated: 5,112 more rows]

## Sheet: DGE CAR- vs CAR+ CD8+ post
cell_type	gene	p_val	p_val_adj	avg_logFCpos	type	de_family	avg_logFC	de_method	de_type	pct_Patient 1/Day 7	pct_Patient 1/Peak	pct_Patient 1/Peak CAR T	pct_Patient 2/Peak	pct_Patient 2/Peak2	pct_Patient 2/Day 24 CART	pct_Patient 3/Peak	pct_Patient 3/Peak CAR T	pct_Patient 4/Peak	pct_Patient 4/Day 21	pct_Patient 4/Peak CAR T	CART_pct_mean	CART_pct_min	CART_pct_max	CART_pct_median	PBMC_pct_mean	PBMC_pct_min	PBMC_pct_max	PBMC_pct_median
[truncated: 975 more rows]

[truncated: 3 more sheets: DGE CAR prod vs circ CD8+, DGE CAR- pre vs post CD8+, DGE Gamma Delta T cells]
