# Supplementary material for: CAR+ and CAR- T cells differentiate into an NK-like subset that is associated with increased inflammatory cytokines following infusion
Source: medRxiv preprint, doi:10.1101/2022.03.29.22273013, version 1 (2022-04-02)
Supplement: Supplementary Tables S6 [file 273013_file06.xlsx]

## Sheet: GSEA_clusters
Summary of GSEA using genes from differnetial expresison analysis from clustering analysis, per sample
cluster	pathway	sample	NES
C1	GOCC_PLASMA_MEMBRANE_SIGNALING_RECEPTOR_COMPLEX	Patient 1_Peak CAR T, Patient 1_Peak CAR T, Patient 1_Preinfusion, Patient 1_Preinfusion, Patient 1_Product, Patient 1_Product, Patient 2_Peak2, Patient 2_Peak2, Patient 2_Preinfusion, Patient 2_Preinfusion, Patient 3_Peak, Patient 3_Peak, Patient 3_Peak CAR T, Patient 3_Preinfusion, Patient 3_Preinfusion, Patient 4_Day 21, Patient 4_Peak CAR T, Patient 4_Peak CAR T, Patient 4_Preinfusion, Patien…	2.39283315361128, 2.3897921784823, 2.883571918476, 2.85341341605202, 2.3251517912002, 2.30890330518164, 2.32166305639274, 2.3044340249896, 2.60061812923469, 2.55054782994417, 2.35725584784904, 2.34796975663879, 2.09343399610248, 2.60863875936344, 2.59034363550275, 2.30468153855557, 2.61483076189958, 2.59954251310893, 2.32112850607439, 2.3135558348485
C1	GOCC_T_CELL_RECEPTOR_COMPLEX	Patient 1_Peak CAR T, Patient 1_Peak CAR T, Patient 1_Preinfusion, Patient 1_Preinfusion, Patient 1_Product, Patient 1_Product, Patient 2_Peak2, Patient 2_Peak2, Patient 3_Peak, Patient 3_Peak, Patient 3_Peak CAR T, Patient 3_Peak CAR T, Patient 3_Preinfusion, Patient 3_Preinfusion, Patient 4_Day 21, Patient 4_Peak CAR T, Patient 4_Peak CAR T, Patient 4_Preinfusion, Patient 4_Preinfusion	2.33320646706576, 2.30971224685042, 2.67267277149159, 2.62477731747176, 2.31418691815129, 2.27756058033937, 2.08768254353622, 2.07669492693344, 2.18655625227353, 2.16994084266996, 2.59757788190862, 2.59280998838, 2.46025917609404, 2.42600251949916, 2.10122999761228, 2.25599949380805, 2.25481043254018, 2.23033447964957, 2.22080568982466
C1	NKT	Patient 1_Day 7, Patient 1_Peak, Patient 1_Peak CAR T, Patient 1_Preinfusion, Patient 1_Product, Patient 2_Peak, Patient 2_Peak2, Patient 2_Preinfusion, Patient 2_Product, Patient 3_Peak, Patient 3_Peak CAR T, Patient 3_Preinfusion, Patient 3_Product, Patient 4_Day 21, Patient 4_Peak, Patient 4_Peak CAR T, Patient 4_Preinfusion, Patient 4_Product	2.52463280070654, 2.13211482789344, 3.03634255403376, 3.34614481481335, 2.90291386785678, 1.80863581019405, 2.62607251923916, 2.58326617962057, 2.52194956682184, 2.53158895221975, 4.04016423515051, 3.12510783594554, 2.66241409839622, 2.76422407933872, 2.51797566731682, 2.92875433729189, 3.21551688057379, 2.6254359823466
C1	GOCC_INTRINSIC_COMPONENT_OF_PLASMA_MEMBRANE	Patient 1_Peak CAR T, Patient 1_Peak CAR T, Patient 1_Preinfusion, Patient 1_Preinfusion, Patient 1_Product, Patient 1_Product, Patient 2_Preinfusion, Patient 3_Peak, Patient 3_Peak CAR T, Patient 3_Preinfusion, Patient 3_Preinfusion, Patient 3_Product, Patient 4_Day 21, Patient 4_Peak CAR T, Patient 4_Peak CAR T, Patient 4_Preinfusion, Patient 4_Preinfusion	2.94754832061484, 2.92267709127237, 3.19224528463131, 3.16861792406024, 2.6185751109799, 2.61569984176828, 2.95911250876235, 2.10767354174802, 2.09033137111426, 2.49544757559699, 2.48165212679692, 2.04354018044671, 2.142136843213, 2.63662084699631, 2.63370197809239, 2.67305726899124, 2.64781882454662
C1	HOFT_PBMC_TICE_BCG_RBCG_AG85A_AG85B_AGE_18_40YO_CORRELATED_WITH_WHOLE_BLOOD_BACTERICIDAL_ACTIVITY_NEGATIVE	Patient 1_Day 7, Patient 1_Peak, Patient 1_Peak CAR T, Patient 1_Preinfusion, Patient 1_Product, Patient 2_Peak2, Patient 2_Preinfusion, Patient 2_Product, Patient 3_Peak, Patient 3_Peak CAR T, Patient 3_Preinfusion, Patient 3_Product, Patient 4_Day 21, Patient 4_Peak, Patient 4_Peak CAR T, Patient 4_Preinfusion, Patient 4_Product	2.38519746936276, 2.65329074245511, 3.23957315942696, 3.30818625677523, 2.64378930203424, 3.16745316753457, 3.38212674018888, 2.25099096563698, 2.59682104052936, 3.23277883748866, 2.97430617742193, 2.4777687203935, 2.80700752408527, 2.8257194534728, 2.93681725882561, 2.92561763952011, 2.58926161057675
C1	NK	Patient 1_Day 7, Patient 1_Peak, Patient 1_Peak CAR T, Patient 1_Preinfusion, Patient 1_Product, Patient 2_Peak2, Patient 2_Preinfusion, Patient 2_Product, Patient 3_Peak, Patient 3_Peak CAR T, Patient 3_Preinfusion, Patient 3_Product, Patient 4_Day 21, Patient 4_Peak, Patient 4_Peak CAR T, Patient 4_Preinfusion, Patient 4_Product	2.50826316037129, 2.47716552216847, 3.18473492974845, 2.96493533169999, 2.81369184718217, 2.73334283712487, 2.49508733897789, 2.3166707735703, 2.59167222316372, 3.35766351954343, 2.57360079327665, 2.52514436545079, 2.98544258795761, 2.84563347515416, 2.80953571459524, 2.99639814488851, 2.41065226203204
C1	DURANTE_ADULT_OLFACTORY_NEUROEPITHELIUM_NK_CELLS	Patient 1_Peak, Patient 1_Peak CAR T, Patient 1_Preinfusion, Patient 1_Product, Patient 2_Peak2, Patient 2_Preinfusion, Patient 2_Product, Patient 3_Peak, Patient 3_Peak CAR T, Patient 3_Preinfusion, Patient 3_Product, Patient 4_Day 21, Patient 4_Peak, Patient 4_Peak CAR T, Patient 4_Preinfusion, Patient 4_Product	2.48815168643566, 4.55423497733584, 4.34954774500559, 3.48787344932277, 3.21356303025691, 4.6873959654279, 2.78857803707658, 4.15587440608862, 5.66142609414111, 4.47288828226128, 2.8211442170793, 3.60632312755642, 3.79075666140877, 3.90571380410615, 3.92447297019544, 3.03465991844698
C1	EtienneStatPos	Patient 1_Peak, Patient 1_Peak CAR T, Patient 1_Preinfusion, Patient 1_Product, Patient 2_Day 24 CART, Patient 2_Peak, Patient 2_Peak2, Patient 2_Product, Patient 3_Peak, Patient 3_Preinfusion, Patient 3_Product, Patient 4_Day 21, Patient 4_Peak, Patient 4_Peak CAR T, Patient 4_Preinfusion, Patient 4_Product	3.90224755250726, 3.17663950227769, 3.16270218801974, 3.00039632605505, 2.2017209247393, 1.84122004980278, 5.59605215907195, 2.67609775820353, 4.14825065504794, 2.84563743613327, 2.40226322193829, 4.01381977313179, 3.43231423996891, 3.09143803593238, 3.25472950262227, 2.74335263800943
C1	Gamma.Delta	Patient 1_Peak, Patient 1_Peak CAR T, Patient 1_Preinfusion, Patient 1_Product, Patient 2_Peak2, Patient 2_Preinfusion, Patient 2_Product, Patient 3_Peak, Patient 3_Peak CAR T, Patient 3_Preinfusion, Patient 3_Product, Patient 4_Day 21, Patient 4_Peak, Patient 4_Peak CAR T, Patient 4_Preinfusion, Patient 4_Product	2.09355648440359, 2.55691174477775, 3.05657214071808, 2.84219356614806, 2.07732916653057, 2.10414098845814, 2.38725451822646, 1.70744489651863, 3.11331530679929, 2.63500233331741, 2.35953082113689, 2.19154122157307, 1.89700178033425, 2.5893876028736, 2.59357002773413, 2.56211640408512
C1	GNF2_CD7	Patient 1_Peak, Patient 1_Peak CAR T, Patient 1_Preinfusion, Patient 1_Product, Patient 2_Peak2, Patient 2_Preinfusion, Patient 2_Product, Patient 3_Peak, Patient 3_Peak CAR T, Patient 3_Preinfusion, Patient 3_Product, Patient 4_Day 21, Patient 4_Peak, Patient 4_Peak CAR T, Patient 4_Preinfusion, Patient 4_Product	2.52247583112813, 2.97817765281999, 3.24839931229203, 2.55660539182395, 2.55813496873449, 3.17751873501494, 2.15459339404781, 2.43938311967923, 2.73708537007775, 2.70775449246841, 2.1963194352237, 2.57636153013105, 2.58341403513332, 3.28140219867566, 2.89058542543958, 2.24527202022708
C1	GNF2_IL2RB	Patient 1_Peak, Patient 1_Peak CAR T, Patient 1_Preinfusion, Patient 1_Product, Patient 2_Peak2, Patient 2_Preinfusion, Patient 2_Product, Patient 3_Peak, Patient 3_Peak CAR T, Patient 3_Preinfusion, Patient 3_Product, Patient 4_Day 21, Patient 4_Peak, Patient 4_Peak CAR T, Patient 4_Preinfusion, Patient 4_Product	2.56618126529318, 3.29393505336069, 3.25412997909367, 2.68635168430306, 3.33742163948029, 3.17362144973595, 2.15459339404781, 2.851622873462, 3.36500304185394, 3.16124860743439, 2.18803093643751, 3.02498609634162, 3.05579228062882, 3.62887385895434, 3.14719470562807, 2.28241106834531
C1	GNF2_MATK	Patient 1_Peak, Patient 1_Peak CAR T, Patient 1_Preinfusion, Patient 1_Product, Patient 2_Peak2, Patient 2_Preinfusion, Patient 2_Product, Patient 3_Peak, Patient 3_Peak CAR T, Patient 3_Preinfusion, Patient 3_Product, Patient 4_Day 21, Patient 4_Peak, Patient 4_Peak CAR T, Patient 4_Preinfusion, Patient 4_Product	2.16544616730846, 2.36571873250712, 3.01784660351006, 2.18436857642501, 2.3051549381915, 3.15806311849528, 1.79066829578024, 2.54883125202827, 2.40748914742002, 2.46057060573707, 1.83978856186525, 2.23291151425793, 2.33448313954656, 3.04952265301734, 2.49459295100072, 1.87735170100198
C1	GNF2_PTPN4	Patient 1_Peak, Patient 1_Peak CAR T, Patient 1_Preinfusion, Patient 1_Product, Patient 2_Peak2, Patient 2_Preinfusion, Patient 2_Product, Patient 3_Peak, Patient 3_Peak CAR T, Patient 3_Preinfusion, Patient 3_Product, Patient 4_Day 21, Patient 4_Peak, Patient 4_Peak CAR T, Patient 4_Preinfusion, Patient 4_Product	2.46332831126711, 3.18033190188055, 3.37246589513605, 2.68635168430306, 2.95664913929902, 3.60262061391798, 2.15459339404781, 2.64418894078838, 2.67920427678821, 3.04904649162942, 2.1963194352237, 2.71866486767256, 2.59482783621352, 3.61856951810694, 2.98713259058299, 2.33097586210697
C1	GNF2_RAB7L1	Patient 1_Peak, Patient 1_Peak CAR T, Patient 1_Preinfusion, Patient 1_Product, Patient 2_Peak2, Patient 2_Preinfusion, Patient 2_Product, Patient 3_Peak, Patient 3_Peak CAR T, Patient 3_Preinfusion, Patient 3_Product, Patient 4_Day 21, Patient 4_Peak, Patient 4_Peak CAR T, Patient 4_Preinfusion, Patient 4_Product	2.25218676571345, 2.70620530829856, 3.12187449045513, 2.5697170185345, 2.3051549381915, 3.34792558739922, 1.79066829578024, 2.58231744618014, 2.8724704513192, 2.41563286234331, 1.99598966005293, 2.50042390525654, 2.45843363022847, 3.29493986356252, 2.75939793162952, 2.03495384535503
C1	HAY_BONE_MARROW_NK_CELLS	Patient 1_Peak, Patient 1_Peak CAR T, Patient 1_Preinfusion, Patient 1_Product, Patient 2_Peak2, Patient 2_Preinfusion, Patient 2_Product, Patient 3_Peak, Patient 3_Peak CAR T, Patient 3_Preinfusion, Patient 3_Product, Patient 4_Day 21, Patient 4_Peak, Patient 4_Peak CAR T, Patient 4_Preinfusion, Patient 4_Product	2.40156541624722, 4.38288968241518, 4.68322694216592, 3.541562245888, 3.63391341001288, 4.72418361005519, 2.48375882249203, 3.44413076931255, 3.00851161283858, 3.96842433998187, 2.49877251737245, 4.06792458755937, 2.60219560639648, 4.20616109131303, 3.86382303296066, 2.70739618108165
C1	ILC	Patient 1_Peak, Patient 1_Peak CAR T, Patient 1_Preinfusion, Patient 1_Product, Patient 2_Peak2, Patient 2_Preinfusion, Patient 2_Product, Patient 3_Peak, Patient 3_Peak CAR T, Patient 3_Preinfusion, Patient 3_Product, Patient 4_Day 21, Patient 4_Peak, Patient 4_Peak CAR T, Patient 4_Preinfusion, Patient 4_Product	1.73735254287964, 2.52215735956101, 2.61676940232957, 2.35583468241144, 1.7951592186284, 2.79889873576041, 2.11980055209397, 2.49160416153688, 2.98727350448152, 2.44688496762414, 2.11594930897036, 2.46729602466394, 2.18261999451701, 2.91879909798674, 2.74798316840806, 2.0399394450353
C1	KAZMIN_PBMC_P_FALCIPARUM_RTSS_AS01_AGE_UNKNOWN_CORRELATED_WITH_PROTECTION_56DY_NEGATIVE	Patient 1_Peak, Patient 1_Peak CAR T, Patient 1_Preinfusion, Patient 1_Product, Patient 2_Peak2, Patient 2_Preinfusion, Patient 2_Product, Patient 3_Peak, Patient 3_Peak CAR T, Patient 3_Preinfusion, Patient 3_Product, Patient 4_Day 21, Patient 4_Peak, Patient 4_Peak CAR T, Patient 4_Preinfusion, Patient 4_Product	2.51474563132267, 3.68806472340999, 3.48780056332183, 2.6838371817201, 2.78384942267902, 3.70964439482877, 2.42116847983086, 2.82803478880475, 3.57556982009836, 3.2904935399132, 2.33062020863096, 2.95549981299574, 2.83094256411611, 3.43393686056833, 3.29080367859669, 2.38684398839832
C1	NK.like.cytotoxicity	Patient 1_Peak, Patient 1_Peak CAR T, Patient 1_Preinfusion, Patient 1_Product, Patient 2_Peak2, Patient 2_Preinfusion, Patient 2_Product, Patient 3_Peak, Patient 3_Peak CAR T, Patient 3_Preinfusion, Patient 3_Product, Patient 4_Day 21, Patient 4_Peak, Patient 4_Peak CAR T, Patient 4_Preinfusion, Patient 4_Product	1.937214698212, 3.15770180742142, 3.35180811832495, 2.72497081145362, 2.23260461093434, 3.08170799592418, 2.34406223027365, 2.32144448085358, 3.12653450311551, 2.89405977924619, 2.31995573572994, 2.74881356710231, 2.28659723853725, 3.0386064373665, 2.97439431043108, 2.38481391878377
C1	RUBENSTEIN_SKELETAL_MUSCLE_NK_CELLS	Patient 1_Peak, Patient 1_Peak CAR T, Patient 1_Preinfusion, Patient 1_Product, Patient 2_Peak2, Patient 2_Preinfusion, Patient 2_Product, Patient 3_Peak, Patient 3_Peak CAR T, Patient 3_Preinfusion, Patient 3_Product, Patient 4_Day 21, Patient 4_Peak, Patient 4_Peak CAR T, Patient 4_Preinfusion, Patient 4_Product	2.25385065736132, 3.69509843895883, 3.69660083928837, 3.23426863486372, 3.24054330795048, 3.22954110387021, 2.36809895364593, 3.69825923239839, 5.51635860952802, 2.96284534489568, 2.65354745336082, 3.0933082053015, 3.5920339824389, 3.54153391015764, 2.86376669286584, 2.65455117142298
C1	TGamma_deltaLONG	Patient 1_Peak, Patient 1_Peak CAR T, Patient 1_Preinfusion, Patient 1_Product, Patient 2_Peak2, Patient 2_Preinfusion, Patient 2_Product, Patient 3_Peak, Patient 3_Peak CAR T, Patient 3_Preinfusion, Patient 3_Product, Patient 4_Day 21, Patient 4_Peak, Patient 4_Peak CAR T, Patient 4_Preinfusion, Patient 4_Product	2.27746879124659, 2.84609697291121, 3.38096478378921, 2.67047782261443, 2.57172482145403, 2.77799253074609, 2.19221230284394, 2.32956430508934, 3.0576545183821, 2.92735560345188, 2.36878151006537, 2.62087127242289, 2.5129298825666, 2.8119202955392, 3.14388351865839, 2.67909286318642
C1	TRAVAGLINI_LUNG_CD8_NAIVE_T_CELL	Patient 1_Peak, Patient 1_Peak CAR T, Patient 1_Preinfusion, Patient 1_Product, Patient 2_Peak2, Patient 2_Preinfusion, Patient 2_Product, Patient 3_Peak, Patient 3_Peak CAR T, Patient 3_Preinfusion, Patient 3_Product, Patient 4_Day 21, Patient 4_Peak, Patient 4_Peak CAR T, Patient 4_Preinfusion, Patient 4_Product	2.75853222783962, 4.23465337976671, 4.43759586931566, 3.26114126131567, 3.4152919913003, 5.23787811349933, 2.81612055136549, 3.62823171564617, 4.16287561022118, 4.50449715210497, 2.61152588637721, 3.52627236780824, 2.7471441985006, 4.09010050632093, 4.18077867888223, 2.49004293301108
C1	TRAVAGLINI_LUNG_NATURAL_KILLER_CELL	Patient 1_Peak, Patient 1_Peak CAR T, Patient 1_Preinfusion, Patient 1_Product, Patient 2_Peak2, Patient 2_Preinfusion, Patient 2_Product, Patient 3_Peak, Patient 3_Peak CAR T, Patient 3_Preinfusion, Patient 3_Product, Patient 4_Day 21, Patient 4_Peak, Patient 4_Peak CAR T, Patient 4_Preinfusion, Patient 4_Product	2.40532302918071, 4.58687744439858, 4.09847650108491, 2.89959335948051, 3.29338072553328, 4.73940441943362, 2.56707821215284, 3.98506218323023, 4.53077165188127, 4.30599916800015, 2.47871702182417, 3.49473591203403, 3.30050902957208, 4.17588867234886, 4.12606122088994, 2.41863828891459
C1	CD8.cytotoxic	Patient 1_Peak CAR T, Patient 1_Preinfusion, Patient 1_Product, Patient 2_Peak2, Patient 2_Preinfusion, Patient 2_Product, Patient 3_Peak, Patient 3_Peak CAR T, Patient 3_Preinfusion, Patient 3_Product, Patient 4_Day 21, Patient 4_Peak, Patient 4_Peak CAR T, Patient 4_Preinfusion, Patient 4_Product	2.86852748160438, 3.45532617751836, 2.87760629548482, 1.96746844961592, 3.14707742684384, 2.13712509486667, 2.20843186373137, 3.59665136249428, 3.29564463590463, 2.61991538272376, 2.40427322007993, 1.81857956833581, 2.74906147671803, 3.33688989877192, 2.62990815847138
C1	CD8.TRM	Patient 1_Peak CAR T, Patient 1_Preinfusion, Patient 1_Product, Patient 2_Peak2, Patient 2_Preinfusion, Patient 2_Product, Patient 3_Peak, Patient 3_Peak CAR T, Patient 3_Preinfusion, Patient 3_Product, Patient 4_Day 21, Patient 4_Peak, Patient 4_Peak CAR T, Patient 4_Preinfusion, Patient 4_Product	2.67870507163905, 2.50656385648787, 2.66897353474548, 1.72120727918068, 2.21758345294499, 2.1261468939079, 2.665914679477, 3.70295461701744, 2.48363778972622, 1.82321196417118, 2.21380798285606, 2.10193855590394, 2.63937043938008, 2.53185283654331, 1.96862614130461
C1	Cytotxic.CD4	Patient 1_Peak, Patient 1_Peak CAR T, Patient 1_Preinfusion, Patient 1_Product, Patient 2_Peak2, Patient 2_Preinfusion, Patient 2_Product, Patient 3_Peak CAR T, Patient 3_Preinfusion, Patient 3_Product, Patient 4_Day 21, Patient 4_Peak, Patient 4_Peak CAR T, Patient 4_Preinfusion, Patient 4_Product	1.99044321273738, 2.66164666120252, 2.76879483914786, 2.25417267776681, 2.38656964696094, 2.47309773258266, 2.12177539093183, 2.5629960993394, 2.26115991319764, 1.87106153065007, 2.47188996322918, 2.14482512563125, 2.43952932585732, 2.55512583038987, 2.13801355143581
C1	FAN_EMBRYONIC_CTX_BRAIN_EFFECTOR_T_CELL	Patient 1_Peak CAR T, Patient 1_Preinfusion, Patient 1_Product, Patient 2_Peak2, Patient 2_Preinfusion, Patient 2_Product, Patient 3_Peak, Patient 3_Peak CAR T, Patient 3_Preinfusion, Patient 3_Product, Patient 4_Day 21, Patient 4_Peak, Patient 4_Peak CAR T, Patient 4_Preinfusion, Patient 4_Product	4.37256352395555, 4.43176664609228, 3.32457484822594, 2.88557621523478, 4.78195941836051, 2.62189206569022, 3.52664607267009, 4.82362338510249, 4.20447063194596, 2.54867170359177, 3.36204436389396, 3.33272001157106, 3.99459169969768, 3.70949917796125, 2.39326371806463
C1	FAN_OVARY_CL4_T_LYMPHOCYTE_NK_CELL_1	Patient 1_Peak CAR T, Patient 1_Preinfusion, Patient 1_Product, Patient 2_Peak2, Patient 2_Preinfusion, Patient 2_Product, Patient 3_Peak, Patient 3_Peak CAR T, Patient 3_Preinfusion, Patient 3_Product, Patient 4_Day 21, Patient 4_Peak, Patient 4_Peak CAR T, Patient 4_Preinfusion, Patient 4_Product	2.70346105884823, 3.21080954037313, 3.31404675264684, 2.22371316342367, 2.22102818898059, 2.61664820095828, 3.40827338321828, 4.34115586409853, 2.82699633404629, 2.55494806019073, 2.53982759426577, 2.31065037472997, 3.19977589400757, 2.43374373644982, 2.70143376189618
C1	Gamma_delta	Patient 1_Peak, Patient 1_Peak CAR T, Patient 1_Preinfusion, Patient 1_Product, Patient 2_Peak2, Patient 2_Product, Patient 3_Peak, Patient 3_Peak CAR T, Patient 3_Preinfusion, Patient 3_Product, Patient 4_Day 21, Patient 4_Peak, Patient 4_Peak CAR T, Patient 4_Preinfusion, Patient 4_Product	1.81138270621505, 1.77876466730907, 2.14184760779734, 1.74664665147128, 2.17952461130796, 1.96443045678875, 1.95876881650999, 2.76398632426743, 1.61806051341423, 1.79765114609254, 2.08936450496869, 2.08903716861982, 1.51867859224246, 2.5836857819255, 2.1934413995839
C1	GOCC_ENDOSOME_MEMBRANE	Patient 1_Peak CAR T, Patient 1_Peak CAR T, Patient 1_Preinfusion, Patient 1_Preinfusion, Patient 2_Preinfusion, Patient 2_Preinfusion, Patient 3_Peak, Patient 3_Peak, Patient 3_Peak CAR T, Patient 3_Preinfusion, Patient 3_Preinfusion, Patient 4_Peak CAR T, Patient 4_Peak CAR T, Patient 4_Preinfusion, Patient 4_Preinfusion	2.48187469768643, 2.44641239269951, 2.83332647698441, 2.81672603181717, 2.25463568380055, 2.24188544324161, 2.60944369915956, 2.59544473140965, 2.11484201117005, 2.40500063955915, 2.40029709125857, 2.27336087674762, 2.26558477816606, 2.14481305061189, 2.11535136079504
C1	GOCC_SIDE_OF_MEMBRANE	Patient 1_Peak CAR T, Patient 1_Preinfusion, Patient 1_Preinfusion, Patient 1_Product, Patient 1_Product, Patient 2_Day 24 CART, Patient 2_Day 24 CART, Patient 2_Preinfusion, Patient 2_Preinfusion, Patient 3_Preinfusion, Patient 3_Preinfusion, Patient 4_Day 21, Patient 4_Peak CAR T, Patient 4_Peak CAR T, Patient 4_Preinfusion	2.07473161335, 2.85849094877704, 2.85641438224898, 2.27468093928346, 2.27207981402142, 1.84843830095469, 1.84087408859341, 2.73555351622552, 2.7340064673966, 2.21588885365415, 2.20937640727996, 2.03428533408021, 2.20534792260096, 2.19699216919779, 2.03124833024609
C1	NK_COMPLETE	Patient 1_Peak CAR T, Patient 1_Preinfusion, Patient 1_Product, Patient 2_Peak2, Patient 2_Preinfusion, Patient 2_Product, Patient 3_Peak, Patient 3_Peak CAR T, Patient 3_Preinfusion, Patient 3_Product, Patient 4_Day 21, Patient 4_Peak, Patient 4_Peak CAR T, Patient 4_Preinfusion, Patient 4_Product	3.10393968474688, 3.45753700703, 2.98457394888033, 2.01066667030387, 2.89591302816698, 2.47581145135754, 2.21374811630099, 3.42071552088907, 3.25670518719694, 2.74711251494424, 2.31428494466876, 2.04159669474212, 2.85638087702692, 2.9362851835639, 2.63891691832531
C1	nk_like_activating	Patient 1_Peak, Patient 1_Peak CAR T, Patient 1_Preinfusion, Patient 1_Product, Patient 2_Peak2, Patient 2_Preinfusion, Patient 2_Product, Patient 3_Peak CAR T, Patient 3_Preinfusion, Patient 3_Product, Patient 4_Day 21, Patient 4_Peak, Patient 4_Peak CAR T, Patient 4_Preinfusion, Patient 4_Product	1.74450935932308, 2.52215735956101, 2.62499220508412, 2.4702289832913, 2.16335634515313, 2.20863871026011, 1.90924570968839, 2.78811720064794, 2.34471681399187, 1.92043689879636, 2.64282209618273, 1.89880263333383, 2.59882887841072, 2.70894114263355, 1.9337837420482
C1	TRAVAGLINI_LUNG_NATURAL_KILLER_T_CELL	Patient 1_Peak CAR T, Patient 1_Preinfusion, Patient 1_Product, Patient 2_Day 24 CART, Patient 2_Preinfusion, Patient 2_Product, Patient 3_Peak, Patient 3_Peak CAR T, Patient 3_Preinfusion, Patient 3_Product, Patient 4_Day 21, Patient 4_Peak, Patient 4_Peak CAR T, Patient 4_Preinfusion, Patient 4_Product	2.99890226614737, 3.34053823843371, 2.86603967466271, 1.40866206406642, 2.32494443773645, 2.30695577681659, 2.20949560915459, 3.28971138110537, 2.56113228055483, 2.09251064610218, 2.36804216192884, 2.48638198204507, 2.9937230663444, 2.60823777345336, 2.32836961624699
C1	AIZARANI_LIVER_C1_NK_NKT_CELLS_1	Patient 1_Peak CAR T, Patient 1_Preinfusion, Patient 1_Product, Patient 2_Preinfusion, Patient 2_Product, Patient 3_Peak, Patient 3_Peak CAR T, Patient 3_Preinfusion, Patient 3_Product, Patient 4_Day 21, Patient 4_Peak, Patient 4_Peak CAR T, Patient 4_Preinfusion, Patient 4_Product	3.93118766399442, 4.29340156917763, 3.62661832238841, 4.94776282983566, 2.93399405723174, 2.47367337419272, 3.55496140403523, 4.42709072109079, 2.69396737230441, 2.62280087667026, 2.24575962187285, 3.43653246756243, 3.72172090658489, 2.91172172428417
C1	AIZARANI_LIVER_C5_NK_NKT_CELLS_3	Patient 1_Peak CAR T, Patient 1_Preinfusion, Patient 1_Product, Patient 2_Preinfusion, Patient 2_Product, Patient 3_Peak, Patient 3_Peak CAR T, Patient 3_Preinfusion, Patient 3_Product, Patient 4_Day 21, Patient 4_Peak, Patient 4_Peak CAR T, Patient 4_Preinfusion, Patient 4_Product	3.42262730611694, 3.9267430787693, 3.31693401287911, 3.66712051845786, 2.68232720145442, 1.87456633815097, 2.76695364587053, 3.49355888761282, 2.56686913859743, 1.87201954067544, 1.73817394257621, 3.22310957512143, 3.0632883122152, 2.67774642462846
C1	CD8..GDTcells	Patient 1_Peak CAR T, Patient 1_Preinfusion, Patient 1_Product, Patient 2_Peak2, Patient 2_Product, Patient 3_Peak, Patient 3_Peak CAR T, Patient 3_Preinfusion, Patient 3_Product, Patient 4_Day 21, Patient 4_Peak, Patient 4_Peak CAR T, Patient 4_Preinfusion, Patient 4_Product	1.68481698528996, 2.5619253897993, 2.64185673319396, 1.83603871101655, 2.24772975271619, 2.27194822256266, 3.34225589011808, 2.45744894324617, 2.3352003370184, 1.9900403821109, 1.66858959750693, 2.25752510829515, 2.54136139944602, 2.4034331441054
C1	CD8.EM	Patient 1_Peak CAR T, Patient 1_Preinfusion, Patient 1_Product, Patient 2_Preinfusion, Patient 2_Product, Patient 3_Peak, Patient 3_Peak CAR T, Patient 3_Preinfusion, Patient 3_Product, Patient 4_Day 21, Patient 4_Peak, Patient 4_Peak CAR T, Patient 4_Preinfusion, Patient 4_Product	2.64486445833455, 3.35995093142603, 2.78987107055482, 3.31622203216428, 2.21034043150165, 2.51264915801103, 4.06791433352953, 3.40337819527834, 2.37777159139134, 1.99746138876476, 1.95265521188442, 2.70975785529055, 3.57788342880266, 2.27577674551571
C1	Chemokines	Patient 1_Day 7, Patient 1_Peak CAR T, Patient 1_Preinfusion, Patient 1_Product, Patient 2_Preinfusion, Patient 3_Peak, Patient 3_Peak CAR T, Patient 3_Preinfusion, Patient 3_Product, Patient 4_Day 21, Patient 4_Peak, Patient 4_Peak CAR T, Patient 4_Preinfusion, Patient 4_Product	1.92355647917025, 1.70492249655292, 1.68959897725829, 1.97359756179576, 1.32892296371743, 1.68026736490141, 1.53423755719456, 1.33066077216582, 1.82173674719237, 1.79428208697507, 1.6049880318789, 1.64885607240809, 1.68251060737656, 1.737382948895
C1	DESCARTES_FETAL_PLACENTA_LYMPHOID_CELLS	Patient 1_Peak CAR T, Patient 1_Preinfusion, Patient 1_Product, Patient 2_Preinfusion, Patient 2_Product, Patient 3_Peak, Patient 3_Peak CAR T, Patient 3_Preinfusion, Patient 3_Product, Patient 4_Day 21, Patient 4_Peak, Patient 4_Peak CAR T, Patient 4_Preinfusion, Patient 4_Product	3.22546528202336, 3.66173480818618, 3.43649283108944, 2.98873876477022, 2.5998954865185, 2.08835738489286, 3.29447555038007, 2.8372261802465, 2.5960135485183, 1.91656731652695, 1.7193360586792, 2.78417727058488, 2.48443643012573, 2.4507701549925
C1	DURANTE_ADULT_OLFACTORY_NEUROEPITHELIUM_CD8_T_CELLS	Patient 1_Peak CAR T, Patient 1_Preinfusion, Patient 1_Product, Patient 2_Preinfusion, Patient 2_Product, Patient 3_Peak, Patient 3_Peak CAR T, Patient 3_Preinfusion, Patient 3_Product, Patient 4_Day 21, Patient 4_Peak, Patient 4_Peak CAR T, Patient 4_Preinfusion, Patient 4_Product	3.71254321709977, 3.96563636990922, 3.64527182365099, 4.46062556937449, 2.90262968926806, 3.18071535358815, 4.37874785723821, 3.66597932292494, 2.34768391433579, 2.43117333244746, 2.4001649525957, 3.76814505901721, 2.77639164509784, 2.57484081402707
C1	GOCC_MHC_CLASS_I_PROTEIN_COMPLEX	Patient 1_Preinfusion, Patient 1_Preinfusion, Patient 2_Day 24 CART, Patient 2_Day 24 CART, Patient 2_Preinfusion, Patient 2_Preinfusion, Patient 3_Peak, Patient 3_Peak, Patient 3_Preinfusion, Patient 3_Preinfusion, Patient 4_Peak CAR T, Patient 4_Peak CAR T, Patient 4_Preinfusion, Patient 4_Preinfusion	2.4207637795441, 2.39046891933675, 1.41652337300006, 1.40441200862498, 2.43237404171093, 2.42198016210126, 2.09819960492911, 2.08108807773017, 2.26346356776971, 2.25609937819854, 1.89741747651692, 1.88274413074542, 2.0900569383537, 2.08833127347144
C1	GOCC_RECEPTOR_COMPLEX	Patient 1_Peak CAR T, Patient 1_Preinfusion, Patient 1_Preinfusion, Patient 1_Product, Patient 1_Product, Patient 2_Preinfusion, Patient 2_Preinfusion, Patient 3_Peak, Patient 3_Preinfusion, Patient 3_Preinfusion, Patient 4_Peak CAR T, Patient 4_Peak CAR T, Patient 4_Preinfusion, Patient 4_Preinfusion	2.25645315693306, 2.50350289320676, 2.49995884874221, 2.20778028876785, 2.20248230395462, 2.18681044919467, 2.14632522221815, 2.02577153892379, 2.07610024516282, 2.07205951256196, 2.40639824451019, 2.39259400135007, 2.3213500618251, 2.27981235744397
C1	MODULE_60	Patient 1_Peak CAR T, Patient 1_Preinfusion, Patient 1_Product, Patient 2_Preinfusion, Patient 2_Product, Patient 3_Peak, Patient 3_Peak CAR T, Patient 3_Preinfusion, Patient 3_Product, Patient 4_Day 21, Patient 4_Peak, Patient 4_Peak CAR T, Patient 4_Preinfusion, Patient 4_Product	2.57465399002179, 2.77135055604279, 2.4941130725493, 2.79140961711531, 2.29535215459328, 2.28444486105505, 3.2047620532841, 2.82605898601061, 1.90187874812351, 1.84770484657101, 2.400176906439, 2.30139375834769, 1.97375658732908, 2.13022805838469
C1	CUI_DEVELOPING_HEART_C9_B_T_CELL	Patient 1_Peak CAR T, Patient 1_Preinfusion, Patient 1_Product, Patient 2_Preinfusion, Patient 2_Product, Patient 3_Peak, Patient 3_Peak CAR T, Patient 3_Preinfusion, Patient 3_Product, Patient 4_Day 21, Patient 4_Peak CAR T, Patient 4_Preinfusion, Patient 4_Product	3.62464386226156, 3.95838236858148, 3.0485418699993, 4.46985783358473, 2.65288461485258, 2.01347101411573, 3.48911408040901, 2.89676824600725, 1.98604489487089, 1.70589110023732, 3.42054407002057, 2.2205955043114, 2.02906488835398
C1	DESCARTES_FETAL_ADRENAL_LYMPHOID_CELLS	Patient 1_Peak CAR T, Patient 1_Preinfusion, Patient 1_Product, Patient 2_Preinfusion, Patient 2_Product, Patient 3_Peak, Patient 3_Peak CAR T, Patient 3_Preinfusion, Patient 3_Product, Patient 4_Day 21, Patient 4_Peak CAR T, Patient 4_Preinfusion, Patient 4_Product	3.58764347248777, 3.43232269516235, 3.09174424165676, 3.68315542060309, 2.62610267876307, 1.76574140333503, 3.20009168536434, 3.25203779285828, 2.26026095042401, 1.86134662014474, 2.813050282886, 2.43974100558888, 2.29882767133079
C1	DESCARTES_FETAL_HEART_LYMPHOID_CELLS	Patient 1_Peak CAR T, Patient 1_Preinfusion, Patient 1_Product, Patient 2_Preinfusion, Patient 2_Product, Patient 3_Peak, Patient 3_Peak CAR T, Patient 3_Preinfusion, Patient 3_Product, Patient 4_Day 21, Patient 4_Peak CAR T, Patient 4_Preinfusion, Patient 4_Product	3.18325017323374, 3.0698841019947, 2.81472701707941, 2.94348730600822, 2.40427417560385, 1.85392966909702, 3.26465445755958, 3.26110908646004, 2.18003128719529, 2.16699155849725, 2.46165420042151, 2.56331154607088, 2.39384157127693
C1	DESCARTES_FETAL_LUNG_LYMPHOID_CELLS	Patient 1_Peak CAR T, Patient 1_Preinfusion, Patient 1_Product, Patient 2_Preinfusion, Patient 2_Product, Patient 3_Peak, Patient 3_Peak CAR T, Patient 3_Preinfusion, Patient 3_Product, Patient 4_Day 21, Patient 4_Peak CAR T, Patient 4_Preinfusion, Patient 4_Product	3.47081087986778, 3.52768291266404, 3.26188289000544, 3.2160205657725, 2.40427417560385, 1.81814399368661, 3.2703615559229, 3.06485641479446, 2.26267395996583, 1.94597046923867, 2.77604449213873, 2.34871043982473, 2.44000568772834
C1	EtienneStatAll	Patient 1_Peak, Patient 1_Peak CAR T, Patient 1_Preinfusion, Patient 1_Product, Patient 2_Peak2, Patient 2_Product, Patient 3_Preinfusion, Patient 3_Product, Patient 4_Day 21, Patient 4_Peak, Patient 4_Peak CAR T, Patient 4_Preinfusion, Patient 4_Product	1.80971451655363, 2.43469877835621, 2.31738025580417, 2.12890960650068, 3.03292336403612, 2.17797169238458, 2.16675404707725, 2.35649318866938, 2.51892609248992, 2.73261743139818, 2.88963940013865, 2.08973905544427, 2.11511319947776
C1	FAN_EMBRYONIC_CTX_BIG_GROUPS_BRAIN_IMMUNE	Patient 1_Peak CAR T, Patient 1_Preinfusion, Patient 1_Product, Patient 2_Preinfusion, Patient 2_Product, Patient 3_Peak, Patient 3_Peak CAR T, Patient 3_Preinfusion, Patient 4_Day 21, Patient 4_Peak, Patient 4_Peak CAR T, Patient 4_Preinfusion, Patient 4_Product	3.85577577680917, 4.23731450881368, 2.77244527865457, 3.64276649857955, 2.00547311207586, 2.11200934387986, 3.28403865053482, 2.69123669229375, 1.78691225448214, 1.77198653732026, 3.18620461461363, 1.79462147372431, 1.77959461868412
C1	GOCC_CELL_SURFACE	Patient 1_Preinfusion, Patient 1_Preinfusion, Patient 2_Peak2, Patient 2_Preinfusion, Patient 2_Preinfusion, Patient 3_Peak, Patient 3_Peak CAR T, Patient 3_Preinfusion, Patient 3_Preinfusion, Patient 4_Peak CAR T, Patient 4_Peak CAR T, Patient 4_Preinfusion, Patient 4_Preinfusion	3.14183829103035, 3.12150942124891, 1.89346422343113, 2.17062902040474, 2.15288831791945, 2.07789544472286, 2.45254753624365, 2.08517513257472, 2.07245114917417, 2.12480829640154, 2.11790689534548, 2.26052388565925, 2.24150628879361
C1	GOCC_EARLY_ENDOSOME_MEMBRANE	Patient 1_Peak CAR T, Patient 1_Preinfusion, Patient 1_Preinfusion, Patient 2_Preinfusion, Patient 2_Preinfusion, Patient 3_Peak, Patient 3_Preinfusion, Patient 3_Preinfusion, Patient 4_Day 21, Patient 4_Peak CAR T, Patient 4_Peak CAR T, Patient 4_Preinfusion, Patient 4_Preinfusion	2.01295291320444, 2.41316526047923, 2.40663575059503, 3.01079355596927, 2.94023135999979, 2.16464036154888, 2.55757730075842, 2.53404011708386, 2.2322549379888, 2.02987957300873, 2.02173730963321, 2.3851763385796, 2.35794351674219
C1	GSE26495_NAIVE_VS_PD1HIGH_CD8_TCELL_DN	Patient 1_Peak CAR T, Patient 1_Preinfusion, Patient 1_Product, Patient 2_Preinfusion, Patient 2_Product, Patient 3_Peak, Patient 3_Peak CAR T, Patient 3_Preinfusion, Patient 4_Day 21, Patient 4_Peak, Patient 4_Peak CAR T, Patient 4_Preinfusion, Patient 4_Product	3.4372115359545, 3.80783109000919, 2.79597862312051, 3.09054943991458, 2.1746879383261, 2.62254107773148, 3.32723626091348, 3.50454701150762, 2.34307076531319, 2.46392978662068, 3.01167055494369, 3.33139529740965, 2.50600107842945
C1	GSE26495_NAIVE_VS_PD1LOW_CD8_TCELL_DN	Patient 1_Peak CAR T, Patient 1_Preinfusion, Patient 1_Product, Patient 2_Preinfusion, Patient 2_Product, Patient 3_Peak, Patient 3_Peak CAR T, Patient 3_Preinfusion, Patient 4_Day 21, Patient 4_Peak, Patient 4_Peak CAR T, Patient 4_Preinfusion, Patient 4_Product	4.22948877565655, 4.28807024072578, 3.02885473896505, 3.77817342507994, 2.54506170849239, 3.37056215517264, 3.96319044848851, 3.81301964832232, 3.40424345941302, 3.20052901908308, 3.77911779871124, 3.91065029175988, 2.74814490477045
C1	GSE34205_RSV_VS_FLU_INF_INFANT_PBMC_DN	Patient 1_Peak CAR T, Patient 1_Preinfusion, Patient 1_Product, Patient 2_Preinfusion, Patient 2_Product, Patient 3_Peak, Patient 3_Peak CAR T, Patient 3_Preinfusion, Patient 4_Day 21, Patient 4_Peak, Patient 4_Peak CAR T, Patient 4_Preinfusion, Patient 4_Product	3.54605385845435, 3.75743042773908, 2.69502256132633, 2.97931052035412, 2.46706104499887, 2.85703935495226, 2.77447220217493, 2.73007637025977, 2.53945693615991, 2.50078351033366, 3.24265703292304, 3.14445259047759, 2.3867053421412
C1	GSE45739_UNSTIM_VS_ACD3_ACD28_STIM_NRAS_KO_CD4_TCELL_DN	Patient 1_Peak CAR T, Patient 1_Preinfusion, Patient 1_Product, Patient 2_Preinfusion, Patient 2_Product, Patient 3_Peak, Patient 3_Peak CAR T, Patient 3_Preinfusion, Patient 4_Day 21, Patient 4_Peak, Patient 4_Peak CAR T, Patient 4_Preinfusion, Patient 4_Product	3.85625367924838, 4.01253589565652, 2.93359345045438, 3.89030784394945, 2.69299114563627, 3.01554835200058, 3.70769517051896, 3.83559659449627, 3.01087679020003, 2.3912527406397, 3.75712574578798, 3.68175814997349, 2.69932753327724
C1	GSE45739_UNSTIM_VS_ACD3_ACD28_STIM_WT_CD4_TCELL_DN	Patient 1_Peak CAR T, Patient 1_Preinfusion, Patient 1_Product, Patient 2_Preinfusion, Patient 2_Product, Patient 3_Peak, Patient 3_Peak CAR T, Patient 3_Preinfusion, Patient 4_Day 21, Patient 4_Peak, Patient 4_Peak CAR T, Patient 4_Preinfusion, Patient 4_Product	3.32106094709697, 3.67686727841502, 2.93271785174552, 3.06616558519947, 2.4832748935304, 2.86724838586357, 3.46011922251398, 3.28544623626676, 2.53939920548762, 2.34153393326561, 3.55497371010602, 3.56835872274336, 2.41464912400005
C1	MODULE_84	Patient 1_Peak CAR T, Patient 1_Preinfusion, Patient 1_Product, Patient 2_Preinfusion, Patient 2_Product, Patient 3_Peak, Patient 3_Peak CAR T, Patient 3_Preinfusion, Patient 3_Product, Patient 4_Day 21, Patient 4_Peak CAR T, Patient 4_Preinfusion, Patient 4_Product	2.93331956584859, 3.49291360924543, 3.32076434396777, 2.39981876016603, 2.39225655872841, 2.14809918973459, 3.89411888874431, 2.89299582692317, 2.49862935815076, 2.0311114501912, 2.49291864305742, 2.03269821199605, 2.31425393645722
C1	NK.receptor	Patient 1_Peak CAR T, Patient 1_Preinfusion, Patient 2_Preinfusion, Patient 2_Product, Patient 3_Peak, Patient 3_Peak CAR T, Patient 3_Preinfusion, Patient 3_Product, Patient 4_Day 21, Patient 4_Peak, Patient 4_Peak CAR T, Patient 4_Preinfusion, Patient 4_Product	2.01103376901064, 1.70302269794625, 1.68965684137262, 1.5104598887829, 1.69795438979511, 1.69850623535573, 1.71115175260721, 1.47819827928834, 1.64338294474977, 1.5917963494251, 1.66354948180963, 1.69301535622594, 1.53435145331676
C1	PATEL_SKIN_OF_BODY_ZOSTAVAX_AGE_70_93YO_VZV_CHALLENGED_POST_VACCINATION_VS_UNCHALLENGED_72HR_TOP_30_DEG_UP	Patient 1_Peak, Patient 1_Peak CAR T, Patient 1_Preinfusion, Patient 1_Product, Patient 2_Preinfusion, Patient 2_Product, Patient 3_Peak CAR T, Patient 3_Preinfusion, Patient 3_Product, Patient 4_Day 21, Patient 4_Peak CAR T, Patient 4_Preinfusion, Patient 4_Product	1.95875946106581, 2.16065505087076, 2.81713683107929, 2.48932356209884, 1.73041180297933, 1.95159223874188, 2.13485345476248, 2.1884173042093, 2.03580076683408, 1.9899480421634, 2.37551554394503, 2.5987491818721, 1.95746531589457
C1	DESCARTES_FETAL_PANCREAS_LYMPHOID_CELLS	Patient 1_Peak CAR T, Patient 1_Preinfusion, Patient 1_Product, Patient 2_Preinfusion, Patient 2_Product, Patient 3_Peak CAR T, Patient 3_Preinfusion, Patient 3_Product, Patient 4_Day 21, Patient 4_Peak CAR T, Patient 4_Preinfusion, Patient 4_Product	3.24152721392157, 3.35311729499879, 3.06764573648647, 2.95680822263262, 2.33777341187499, 3.2605375011631, 3.34876948494836, 2.10239439193371, 1.86211081388445, 2.63008452764217, 2.89284560259036, 2.24652402055008
C1	DESCARTES_MAIN_FETAL_LYMPHOID_CELLS	Patient 1_Peak CAR T, Patient 1_Preinfusion, Patient 1_Product, Patient 2_Preinfusion, Patient 2_Product, Patient 3_Peak, Patient 3_Peak CAR T, Patient 3_Preinfusion, Patient 3_Product, Patient 4_Peak CAR T, Patient 4_Preinfusion, Patient 4_Product	2.83677593070426, 3.37811829348114, 2.72205452610344, 3.48722422639129, 1.83453347155999, 1.85345907379985, 2.40516171599934, 2.99598198215816, 1.94586720938612, 2.69250101339106, 1.83054767063104, 2.06253575491431
C1	FAN_OVARY_CL12_T_LYMPHOCYTE_NK_CELL_2	Patient 1_Peak CAR T, Patient 1_Preinfusion, Patient 1_Product, Patient 2_Preinfusion, Patient 2_Product, Patient 3_Peak, Patient 3_Peak CAR T, Patient 3_Preinfusion, Patient 3_Product, Patient 4_Day 21, Patient 4_Peak, Patient 4_Peak CAR T	3.07138207609539, 2.86650606850376, 2.38192664089517, 3.01652505647444, 2.26714742572851, 2.49688445143966, 3.11210152586977, 2.57497874367677, 1.85138057158223, 1.88282912679306, 1.82862421549093, 3.04390834035133
C1	GOCC_VESICLE_MEMBRANE	Patient 1_Peak CAR T, Patient 1_Preinfusion, Patient 1_Preinfusion, Patient 2_Peak2, Patient 2_Preinfusion, Patient 3_Peak, Patient 3_Preinfusion, Patient 3_Preinfusion, Patient 4_Peak CAR T, Patient 4_Peak CAR T, Patient 4_Preinfusion, Patient 4_Preinfusion	2.07829433297658, 2.97393212795079, 2.94148808477882, 2.09440879517765, 1.69935122215361, 1.92441262873972, 1.81846969411942, 1.81385941238663, 1.97706061143048, 1.9680620711615, 2.51957323670533, 2.4931792275988
C1	GOLDRATH_NAIVE_VS_MEMORY_CD8_TCELL_DN	Patient 1_Peak CAR T, Patient 1_Preinfusion, Patient 1_Product, Patient 2_Preinfusion, Patient 2_Product, Patient 3_Peak, Patient 3_Peak CAR T, Patient 3_Preinfusion, Patient 4_Day 21, Patient 4_Peak CAR T, Patient 4_Preinfusion, Patient 4_Product	2.48199505113176, 2.79128650016056, 2.54386414203845, 2.00648918659443, 2.25182042606566, 2.52085646985433, 3.85849418536171, 2.95261959400188, 2.11395017391472, 2.34159113870842, 2.58531467347423, 2.28647328439002
C1	GOMF_CCR1_CHEMOKINE_RECEPTOR_BINDING	Patient 1_Preinfusion, Patient 1_Preinfusion, Patient 1_Product, Patient 1_Product, Patient 3_Peak, Patient 3_Peak, Patient 3_Product, Patient 3_Product, Patient 4_Peak CAR T, Patient 4_Peak CAR T, Patient 4_Preinfusion, Patient 4_Preinfusion	1.6900893074295, 1.68930197742411, 1.94307721037965, 1.93155325889423, 1.68850681520798, 1.6751181087457, 1.83298913558341, 1.81797072558962, 1.65603487968245, 1.65411363962271, 1.69876287672081, 1.67431020985967
C1	GSE3039_NKT_CELL_VS_ALPHAALPHA_CD8_TCELL_DN	Patient 1_Peak CAR T, Patient 1_Preinfusion, Patient 1_Product, Patient 2_Preinfusion, Patient 2_Product, Patient 3_Peak, Patient 3_Peak CAR T, Patient 3_Preinfusion, Patient 4_Day 21, Patient 4_Peak CAR T, Patient 4_Preinfusion, Patient 4_Product	2.98282657395008, 3.42687910554422, 2.7213223399828, 2.37145803833054, 2.4832802435905, 2.45354282320392, 3.24098126820142, 3.42231931375344, 2.15416274913236, 2.58423351815073, 3.08446650995204, 2.11345606401051
C1	GSE36078_WT_VS_IL1R_KO_LUNG_DC_AFTER_AD5_INF_UP	Patient 1_Peak CAR T, Patient 1_Preinfusion, Patient 1_Product, Patient 2_Product, Patient 3_Peak, Patient 3_Peak CAR T, Patient 3_Preinfusion, Patient 4_Day 21, Patient 4_Peak, Patient 4_Peak CAR T, Patient 4_Preinfusion, Patient 4_Product	2.56807405277055, 2.57478915531074, 2.03461741065921, 2.24997875108417, 2.75536817651551, 2.81515226486853, 2.4287947202939, 2.17766118784994, 2.2361840454346, 2.85254792241575, 2.54415725627942, 2.19585578031224
C1	GSE7460_TCONV_VS_TREG_THYMUS_DN	Patient 1_Peak CAR T, Patient 1_Preinfusion, Patient 1_Product, Patient 2_Preinfusion, Patient 2_Product, Patient 3_Peak, Patient 3_Peak CAR T, Patient 3_Preinfusion, Patient 4_Day 21, Patient 4_Peak CAR T, Patient 4_Preinfusion, Patient 4_Product	2.56160905142259, 2.73785085402052, 2.11791770643244, 1.90178880013504, 2.33681106718445, 2.75942391414541, 2.73140792987721, 2.75444324948169, 2.28686253637514, 2.10982542504784, 2.58343167667662, 2.02132821006111
C1	GSE7852_TREG_VS_TCONV_THYMUS_UP	Patient 1_Peak CAR T, Patient 1_Preinfusion, Patient 1_Product, Patient 2_Preinfusion, Patient 2_Product, Patient 3_Peak, Patient 3_Peak CAR T, Patient 3_Preinfusion, Patient 4_Day 21, Patient 4_Peak CAR T, Patient 4_Preinfusion, Patient 4_Product	2.3467778887409, 2.72367866067154, 2.18464692801383, 1.79751585290662, 2.28002409944837, 2.6567916087676, 2.44909749678732, 2.61625524115569, 2.29924398871221, 2.05633122912953, 2.41648578552111, 2.14305343997101
C1	MODULE_45	Patient 1_Peak CAR T, Patient 1_Preinfusion, Patient 1_Product, Patient 2_Preinfusion, Patient 2_Product, Patient 3_Peak CAR T, Patient 3_Preinfusion, Patient 3_Product, Patient 4_Day 21, Patient 4_Peak CAR T, Patient 4_Preinfusion, Patient 4_Product	2.99932779281996, 3.65762524907631, 3.11156743081583, 2.85659344654943, 2.45541833867147, 3.33978589262627, 2.62441228718631, 2.34816289443868, 1.89443247111529, 2.4278744436512, 1.8488452899779, 2.25885039202108
C1	MODULE_5	Patient 1_Peak CAR T, Patient 1_Preinfusion, Patient 1_Product, Patient 2_Preinfusion, Patient 3_Peak, Patient 3_Peak CAR T, Patient 3_Preinfusion, Patient 3_Product, Patient 4_Day 21, Patient 4_Peak, Patient 4_Peak CAR T, Patient 4_Preinfusion	3.4787814547239, 3.24544644502341, 2.69398627338236, 2.82293287776462, 2.53631184577616, 3.71875128463169, 2.62281385439092, 1.89582519357314, 1.90412207413419, 2.03384101239731, 2.29597194674492, 1.80347001836711
C1	NAKAYA_PBMC_FLUAD_MALE_AGE_14_27YO_1D_POSTBOOST_VS_0D_PREIMM_MF59_ADJUVANTED_1DY_GENES_IN_BTM_M40_AND_M53_DN	Patient 1_Peak CAR T, Patient 1_Preinfusion, Patient 1_Product, Patient 2_Preinfusion, Patient 2_Product, Patient 3_Peak, Patient 3_Peak CAR T, Patient 3_Preinfusion, Patient 3_Product, Patient 4_Peak CAR T, Patient 4_Preinfusion, Patient 4_Product	2.91545193498555, 3.14518388103977, 2.88503750908736, 2.75294844347429, 2.22340112889862, 1.97841143481351, 3.3313633425364, 3.20906471340637, 2.09617305072602, 2.00987004929802, 2.59288245848325, 2.0054253871166
C1	Rogue.cells	Patient 1_Peak CAR T, Patient 1_Preinfusion, Patient 1_Product, Patient 2_Preinfusion, Patient 2_Product, Patient 3_Peak, Patient 3_Peak CAR T, Patient 3_Preinfusion, Patient 3_Product, Patient 4_Peak CAR T, Patient 4_Preinfusion, Patient 4_Product	1.63593136795935, 2.48240680600813, 2.59013873435639, 2.1155189189111, 1.82381979456982, 1.9654002895362, 3.48919208121317, 2.68872878831037, 2.02172369186077, 1.93977255812166, 2.30125825652485, 2.17396010419882
C1	AIZARANI_LIVER_C12_NK_NKT_CELLS_4	Patient 1_Peak CAR T, Patient 1_Preinfusion, Patient 1_Product, Patient 2_Preinfusion, Patient 2_Product, Patient 3_Peak CAR T, Patient 3_Preinfusion, Patient 3_Product, Patient 4_Peak CAR T, Patient 4_Preinfusion, Patient 4_Product	2.29362788775014, 2.64489705734354, 2.44763234190593, 2.24693574461503, 2.08304427659649, 3.03583019526509, 2.6171982381552, 2.14978932739908, 2.60443661895048, 2.37511180460519, 2.23597901789154
C1	AIZARANI_LIVER_C3_NK_NKT_CELLS_2	Patient 1_Peak CAR T, Patient 1_Preinfusion, Patient 1_Product, Patient 2_Preinfusion, Patient 2_Product, Patient 3_Peak CAR T, Patient 3_Preinfusion, Patient 3_Product, Patient 4_Peak, Patient 4_Peak CAR T, Patient 4_Product	2.5308602341561, 3.19790041331983, 2.63714650811778, 4.82062724445243, 2.15016059072624, 2.22061608957221, 2.47502582786473, 1.7767707236842, 1.95882111959543, 2.69405962702582, 1.96388544978448
C1	BUSSLINGER_DUODENAL_IMMUNE_CELLS	Patient 1_Peak CAR T, Patient 1_Preinfusion, Patient 1_Product, Patient 2_Product, Patient 3_Preinfusion, Patient 3_Product, Patient 4_Day 21, Patient 4_Peak, Patient 4_Peak CAR T, Patient 4_Preinfusion, Patient 4_Product	2.96482993481713, 2.95078044869719, 2.61939560700345, 2.54813299145052, 2.23424172584871, 2.21938101539461, 1.89843540480605, 2.47743061146671, 3.04017727943369, 1.87850849632031, 2.16501469411359
C1	DESCARTES_FETAL_INTESTINE_LYMPHOID_CELLS	Patient 1_Peak CAR T, Patient 1_Preinfusion, Patient 1_Product, Patient 2_Preinfusion, Patient 2_Product, Patient 3_Peak CAR T, Patient 3_Preinfusion, Patient 3_Product, Patient 4_Peak CAR T, Patient 4_Preinfusion, Patient 4_Product	3.38194589780826, 3.49449621660233, 3.28627764495795, 3.02498770532159, 2.58897959469239, 2.71629736542438, 2.74716879326104, 2.20566558576061, 2.97665225018561, 2.35650900534478, 2.36323947896844
C1	DESCARTES_FETAL_KIDNEY_LYMPHOID_CELLS	Patient 1_Peak CAR T, Patient 1_Preinfusion, Patient 1_Product, Patient 2_Preinfusion, Patient 2_Product, Patient 3_Peak CAR T, Patient 3_Preinfusion, Patient 3_Product, Patient 4_Peak CAR T, Patient 4_Preinfusion, Patient 4_Product	3.2141763533463, 3.18816583719181, 2.69999039875618, 3.24090778737705, 2.09185925108292, 2.5559739650555, 2.45247336959236, 1.79438090522958, 2.61503884827564, 1.9515623552769, 1.83805705849465
C1	GOCC_EXTERNAL_SIDE_OF_PLASMA_MEMBRANE	Patient 1_Preinfusion, Patient 1_Preinfusion, Patient 1_Product, Patient 1_Product, Patient 2_Preinfusion, Patient 2_Preinfusion, Patient 3_Peak CAR T, Patient 3_Preinfusion, Patient 4_Peak CAR T, Patient 4_Peak CAR T, Patient 4_Preinfusion	3.13551500017799, 3.13154441747966, 2.25828011896018, 2.25205978218427, 2.71069920849033, 2.65282837226569, 1.98864002767206, 1.9210807550768, 2.11914631748091, 2.09898579661277, 2.16783291280562
C1	GSE15330_LYMPHOID_MULTIPOTENT_VS_MEGAKARYOCYTE_ERYTHROID_PROGENITOR_IKAROS_KO_DN	Patient 1_Peak CAR T, Patient 1_Preinfusion, Patient 1_Product, Patient 2_Preinfusion, Patient 3_Peak, Patient 3_Peak CAR T, Patient 3_Preinfusion, Patient 4_Day 21, Patient 4_Peak CAR T, Patient 4_Preinfusion, Patient 4_Product	2.86988111148469, 3.00633854479342, 2.93725275337745, 1.67964542860424, 2.47251219222259, 3.41398249426804, 2.92134810965336, 2.30573662194726, 2.74224683097942, 2.98344319451975, 2.47697501600354
C1	GSE21063_WT_VS_NFATC1_KO_16H_ANTI_IGM_STIM_BCELL_DN	Patient 1_Peak CAR T, Patient 1_Preinfusion, Patient 1_Product, Patient 2_Preinfusion, Patient 3_Peak, Patient 3_Peak CAR T, Patient 3_Preinfusion, Patient 4_Day 21, Patient 4_Peak, Patient 4_Peak CAR T, Patient 4_Preinfusion	2.59729286619245, 2.52113342907049, 1.92986658188993, 3.27469913054404, 2.95609703751995, 2.68287442583975, 2.9063297280496, 2.95556409335499, 2.34356129028956, 3.14983612542591, 2.58726051881723
C1	GSE24142_EARLY_THYMIC_PROGENITOR_VS_DN2_THYMOCYTE_UP	Patient 1_Peak CAR T, Patient 1_Preinfusion, Patient 1_Product, Patient 2_Preinfusion, Patient 3_Peak, Patient 3_Peak CAR T, Patient 3_Preinfusion, Patient 4_Day 21, Patient 4_Peak CAR T, Patient 4_Preinfusion, Patient 4_Product	2.75472816098222, 2.93427065576906, 2.34852390631812, 3.0247173878138, 2.31470809717437, 2.21110579508562, 2.54703569059942, 2.34564545706925, 2.5987182164412, 2.1484200003251, 2.09708467527256
C1	GSE24142_EARLY_THYMIC_PROGENITOR_VS_DN3_THYMOCYTE_UP	Patient 1_Peak CAR T, Patient 1_Preinfusion, Patient 1_Product, Patient 2_Preinfusion, Patient 2_Product, Patient 3_Peak, Patient 3_Peak CAR T, Patient 3_Preinfusion, Patient 4_Day 21, Patient 4_Peak CAR T, Patient 4_Product	2.51032326532151, 2.81586801847837, 2.11840219755099, 2.36123930349544, 2.18096145277097, 2.54080365925744, 2.30700908902813, 2.84308936981145, 2.15102210834469, 2.47402627914585, 1.9991724989548
C1	GSE2935_UV_INACTIVATED_VS_LIVE_SENDAI_VIRUS_INF_MACROPHAGE_DN	Patient 1_Peak CAR T, Patient 1_Preinfusion, Patient 1_Product, Patient 2_Preinfusion, Patient 2_Product, Patient 3_Peak, Patient 3_Peak CAR T, Patient 3_Preinfusion, Patient 4_Peak CAR T, Patient 4_Preinfusion, Patient 4_Product	2.53013724996262, 3.24954138762442, 2.56989041176136, 2.3775964365233, 2.35192881064849, 2.12451959011369, 2.76615063122322, 2.59199069757587, 2.75154389109307, 2.27661049772976, 2.39790705081294
C1	GSE3565_CTRL_VS_LPS_INJECTED_DUSP1_KO_SPLENOCYTES_UP	Patient 1_Peak CAR T, Patient 1_Preinfusion, Patient 1_Product, Patient 2_Preinfusion, Patient 2_Product, Patient 3_Peak, Patient 3_Peak CAR T, Patient 3_Preinfusion, Patient 4_Peak CAR T, Patient 4_Preinfusion, Patient 4_Product	2.61515978539454, 3.2593869967651, 2.57900184258852, 2.41872803661502, 2.49623404014604, 2.21157960507091, 2.56322600893857, 2.60461933466664, 2.70669904338986, 2.40362933574024, 2.22107112359309
C1	GSE39916_B_CELL_SPLEEN_VS_PLASMA_CELL_BONE_MARROW_DN	Patient 1_Peak CAR T, Patient 1_Preinfusion, Patient 1_Product, Patient 2_Preinfusion, Patient 2_Product, Patient 3_Peak, Patient 3_Peak CAR T, Patient 3_Preinfusion, Patient 4_Peak CAR T, Patient 4_Preinfusion, Patient 4_Product	2.27794626598598, 3.02997557105972, 2.3034593944492, 2.55187111362282, 2.23905383167171, 2.35935524431251, 2.35745216468994, 2.84158715646831, 2.62076676278116, 2.32547159992848, 2.04071000669933
C1	GSE45365_NK_CELL_VS_CD11B_DC_MCMV_INFECTION_DN	Patient 1_Peak CAR T, Patient 1_Preinfusion, Patient 1_Product, Patient 2_Preinfusion, Patient 3_Peak, Patient 3_Peak CAR T, Patient 3_Preinfusion, Patient 4_Day 21, Patient 4_Peak CAR T, Patient 4_Preinfusion, Patient 4_Product	2.76689201790379, 2.67452107326623, 2.04375808260221, 1.85311760885179, 2.54493275182027, 2.50006485823803, 2.40436965415323, 2.09084022165103, 2.50125183176536, 2.2732184296429, 1.92377297487813
C1	GSE7509_UNSTIM_VS_FCGRIIB_STIM_DC_DN	Patient 1_Peak CAR T, Patient 1_Preinfusion, Patient 1_Product, Patient 2_Preinfusion, Patient 2_Product, Patient 3_Peak, Patient 3_Peak CAR T, Patient 3_Preinfusion, Patient 4_Day 21, Patient 4_Peak CAR T, Patient 4_Preinfusion	2.99253170886829, 3.58407945247375, 2.63826229946277, 2.82679292972529, 2.31939730980401, 2.27827648813759, 2.73184272458598, 2.72018268296908, 2.57063193945622, 2.81122993682623, 2.55195947689162
C1	HALLMARK_ALLOGRAFT_REJECTION	Patient 1_Peak CAR T, Patient 1_Preinfusion, Patient 1_Product, Patient 2_Preinfusion, Patient 2_Product, Patient 3_Peak CAR T, Patient 3_Preinfusion, Patient 3_Product, Patient 4_Peak CAR T, Patient 4_Preinfusion, Patient 4_Product	2.87817446236614, 2.87934852897769, 2.7280097214208, 2.07644598878925, 2.09665548791199, 2.57025053613792, 2.36369568721101, 2.10139052803684, 2.47666906299086, 2.53830305341075, 2.1223566518484
C1	HU_FETAL_RETINA_MICROGLIA	Patient 1_Peak CAR T, Patient 1_Preinfusion, Patient 1_Product, Patient 2_Preinfusion, Patient 2_Product, Patient 3_Peak, Patient 3_Peak CAR T, Patient 3_Preinfusion, Patient 3_Product, Patient 4_Day 21, Patient 4_Peak CAR T	3.3931681926834, 3.30010449143718, 2.04718491109282, 2.74551545863851, 1.67533393015102, 1.71102375727313, 2.01978989372182, 1.95243121396985, 1.90782517602754, 1.83647825128861, 2.75754639410407
C1	REACTOME_IMMUNOREGULATORY_INTERACTIONS_BETWEEN_A_LYMPHOID_AND_A_NON_LYMPHOID_CELL	Patient 1_Peak CAR T, Patient 1_Preinfusion, Patient 1_Product, Patient 2_Peak2, Patient 2_Preinfusion, Patient 3_Peak, Patient 3_Preinfusion, Patient 4_Day 21, Patient 4_Peak, Patient 4_Peak CAR T, Patient 4_Preinfusion	3.07974404364506, 3.26414562706572, 2.28935418302094, 2.58504123644862, 3.533374725693, 2.8115260523045, 3.53246885015179, 2.55771203093527, 1.96408259678969, 2.93921226818631, 3.02524772866649
C1	TRAVAGLINI_LUNG_CAPILLARY_AEROCYTE_CELL	Patient 1_Day 7, Patient 1_Peak CAR T, Patient 1_Preinfusion, Patient 1_Product, Patient 2_Product, Patient 3_Peak, Patient 3_Peak CAR T, Patient 3_Preinfusion, Patient 4_Peak, Patient 4_Peak CAR T, Patient 4_Product	2.54682241296043, 2.37755301670798, 2.20271096582204, 1.67660010051216, 1.6959826847221, 2.11506089009382, 2.68479605411048, 2.39020595932173, 2.17526504851751, 1.70575485680828, 1.81640847811605
C1	BIOCARTA_CTL_PATHWAY	Patient 1_Peak CAR T, Patient 1_Preinfusion, Patient 1_Product, Patient 2_Peak, Patient 2_Preinfusion, Patient 3_Peak, Patient 3_Preinfusion, Patient 4_Day 21, Patient 4_Peak CAR T, Patient 4_Preinfusion	2.23189183536958, 2.29702518293897, 2.03246466707749, 1.64596217567162, 2.45352956665793, 2.52110320223403, 2.39430407783532, 2.19798354569345, 2.37748824106502, 2.32087593774612
C1	BUSSLINGER_GASTRIC_IMMUNE_CELLS	Patient 1_Peak CAR T, Patient 1_Preinfusion, Patient 1_Product, Patient 2_Product, Patient 3_Preinfusion, Patient 3_Product, Patient 4_Day 21, Patient 4_Peak CAR T, Patient 4_Preinfusion, Patient 4_Product	2.81825869406025, 3.3853981700977, 2.79727329299769, 2.4112480937688, 2.19134372349007, 2.24870071923374, 1.83276840306197, 2.87004213611788, 1.93194272362232, 2.27710112794282
C1	DURANTE_ADULT_OLFACTORY_NEUROEPITHELIUM_DENDRITIC_CELLS	Patient 1_Peak CAR T, Patient 1_Preinfusion, Patient 1_Product, Patient 2_Preinfusion, Patient 3_Peak, Patient 3_Peak CAR T, Patient 3_Preinfusion, Patient 3_Product, Patient 4_Day 21, Patient 4_Peak CAR T	2.04292562821423, 2.77025036822835, 2.15239117845065, 2.67986412199814, 1.77105885651672, 2.24329345053422, 2.36366721096063, 1.75048288437494, 1.83372119273232, 2.53725622850242
C1	FAN_EMBRYONIC_CTX_BRAIN_MYELOID	Patient 1_Peak CAR T, Patient 1_Preinfusion, Patient 1_Product, Patient 2_Preinfusion, Patient 2_Product, Patient 3_Peak, Patient 3_Peak CAR T, Patient 3_Preinfusion, Patient 3_Product, Patient 4_Peak CAR T	2.03715232955472, 3.30311064214232, 1.78435581083725, 2.13762814218312, 1.95140205257726, 2.35518312828417, 2.49921116383794, 2.25920781198325, 1.6395459148891, 2.60956019408395
C1	GAO_LARGE_INTESTINE_ADULT_CI_MESENCHYMAL_CELLS	Patient 1_Peak CAR T, Patient 1_Preinfusion, Patient 1_Product, Patient 2_Preinfusion, Patient 2_Product, Patient 3_Peak, Patient 3_Peak CAR T, Patient 3_Preinfusion, Patient 4_Peak CAR T, Patient 4_Preinfusion	3.63922308132572, 3.43331519155943, 2.93557583056981, 2.98578223324072, 2.41894016420053, 1.96235208587852, 3.01830211522088, 2.49908578419979, 2.75800525796088, 1.84790822545885
C1	GOCC_ENDOCYTIC_VESICLE_MEMBRANE	Patient 1_Preinfusion, Patient 1_Preinfusion, Patient 2_Day 24 CART, Patient 2_Day 24 CART, Patient 2_Preinfusion, Patient 3_Peak, Patient 3_Peak, Patient 3_Preinfusion, Patient 3_Preinfusion, Patient 4_Preinfusion	3.04812164667926, 3.0479692266989, 1.41652337300006, 1.40441200862498, 1.98280445347593, 2.29389432651579, 2.28485783946576, 2.5103584890051, 2.50515222706968, 2.05410059976822
C1	GOCC_PLASMA_MEMBRANE_PROTEIN_COMPLEX	Patient 1_Preinfusion, Patient 1_Preinfusion, Patient 2_Peak2, Patient 2_Preinfusion, Patient 3_Peak, Patient 3_Preinfusion, Patient 3_Preinfusion, Patient 4_Peak CAR T, Patient 4_Peak CAR T, Patient 4_Preinfusion	2.68979836091862, 2.67810660348437, 2.01253276704701, 1.82002432627551, 2.28106024929209, 2.01949943005358, 1.9953863248796, 2.17250823515607, 2.17109154605439, 2.00942103610911
C1	GOCC_RECYCLING_ENDOSOME_MEMBRANE	Patient 1_Preinfusion, Patient 1_Preinfusion, Patient 2_Preinfusion, Patient 2_Preinfusion, Patient 3_Preinfusion, Patient 3_Preinfusion, Patient 4_Day 21, Patient 4_Peak CAR T, Patient 4_Peak CAR T, Patient 4_Preinfusion	2.73925493891655, 2.72094262388561, 2.78767479449455, 2.73552462466061, 2.28364356860947, 2.25771361135935, 1.99112048942197, 2.33305120319264, 2.31941044763956, 2.12486105082214
C1	GOMF_ANTIGEN_BINDING	Patient 1_Preinfusion, Patient 1_Preinfusion, Patient 2_Preinfusion, Patient 2_Preinfusion, Patient 3_Peak, Patient 3_Peak, Patient 3_Preinfusion, Patient 3_Preinfusion, Patient 4_Peak CAR T, Patient 4_Peak CAR T	3.12612230442461, 3.12210643670748, 2.34110915221089, 2.2955230127786, 2.57672742497195, 2.55038549705091, 2.42266341720246, 2.39441750680553, 2.18559010757241, 2.18384677335396
C1	GOMF_CCR_CHEMOKINE_RECEPTOR_BINDING	Patient 1_Preinfusion, Patient 1_Preinfusion, Patient 1_Product, Patient 1_Product, Patient 3_Peak, Patient 3_Peak, Patient 3_Product, Patient 3_Product, Patient 4_Peak CAR T, Patient 4_Peak CAR T	1.8091801101009, 1.80659738637132, 2.05215960337631, 2.04801281961796, 1.68850681520798, 1.6751181087457, 1.83298913558341, 1.81797072558962, 1.65603487968245, 1.65411363962271
C1	GOMF_CCR5_CHEMOKINE_RECEPTOR_BINDING	Patient 1_Preinfusion, Patient 1_Preinfusion, Patient 1_Product, Patient 1_Product, Patient 3_Peak, Patient 3_Peak, Patient 3_Product, Patient 3_Product, Patient 4_Peak CAR T, Patient 4_Peak CAR T	1.8091801101009, 1.80659738637132, 1.94307721037965, 1.93155325889423, 1.68850681520798, 1.6751181087457, 1.83298913558341, 1.81797072558962, 1.65603487968245, 1.65411363962271
C1	GSE15735_CTRL_VS_HDAC_INHIBITOR_TREATED_CD4_TCELL_2H_DN	Patient 1_Peak CAR T, Patient 1_Preinfusion, Patient 1_Product, Patient 2_Preinfusion, Patient 2_Product, Patient 3_Peak, Patient 3_Preinfusion, Patient 4_Day 21, Patient 4_Peak CAR T, Patient 4_Preinfusion	2.44297406875578, 2.56255233436318, 2.39578814382867, 1.73490474533936, 2.16455160396869, 2.45542752977519, 2.7083790472406, 2.44245010056391, 2.52301772830687, 2.66228627477185
C1	GSE22886_NAIVE_CD8_TCELL_VS_MONOCYTE_UP	Patient 1_Peak CAR T, Patient 1_Preinfusion, Patient 1_Product, Patient 2_Preinfusion, Patient 2_Product, Patient 3_Peak CAR T, Patient 3_Preinfusion, Patient 4_Peak CAR T, Patient 4_Preinfusion, Patient 4_Product	2.44905333045794, 3.02524968120759, 2.69057663375767, 2.10054592700311, 2.15492108052493, 2.42444370350753, 2.32068746950961, 2.42050583319363, 2.32221125531407, 2.21953235461624
C1	GSE29164_UNTREATED_VS_CD8_TCELL_TREATED_MELANOMA_DAY7_UP	Patient 1_Peak CAR T, Patient 1_Preinfusion, Patient 1_Product, Patient 3_Peak, Patient 3_Peak CAR T, Patient 3_Preinfusion, Patient 4_Peak, Patient 4_Peak CAR T, Patient 4_Preinfusion, Patient 4_Product	2.52841897822504, 2.90194108346323, 2.25086995018514, 2.62391476441238, 2.7515785798355, 2.76718137915327, 2.49375303039905, 2.35740456822656, 2.69835825329855, 2.17802525649201
C1	GSE32164_RESTING_DIFFERENTIATED_VS_CMYC_INHIBITED_MACROPHAGE_DN	Patient 1_Peak CAR T, Patient 1_Preinfusion, Patient 1_Product, Patient 2_Product, Patient 3_Peak, Patient 3_Peak CAR T, Patient 3_Preinfusion, Patient 4_Peak CAR T, Patient 4_Preinfusion, Patient 4_Product	1.88128539593591, 2.04815581418029, 2.45024577375903, 2.18602564197179, 2.35746699799691, 2.73924961245614, 2.17500048139308, 2.07910528899091, 1.92761938351557, 2.21588648836378
C1	GSE3565_CTRL_VS_LPS_INJECTED_SPLENOCYTES_UP	Patient 1_Peak CAR T, Patient 1_Preinfusion, Patient 1_Product, Patient 2_Preinfusion, Patient 2_Product, Patient 3_Peak CAR T, Patient 3_Preinfusion, Patient 4_Peak CAR T, Patient 4_Preinfusion, Patient 4_Product	2.74930019138471, 3.24279938236071, 2.54558363848373, 3.06997368194762, 2.10779995282504, 2.17616532252618, 2.98826124107658, 2.93542659407668, 2.73725061043901, 2.05657171315724
C1	GSE36078_WT_VS_IL1R_KO_LUNG_DC_DN	Patient 1_Peak CAR T, Patient 1_Preinfusion, Patient 1_Product, Patient 3_Peak, Patient 3_Peak CAR T, Patient 3_Preinfusion, Patient 4_Day 21, Patient 4_Peak, Patient 4_Peak CAR T, Patient 4_Preinfusion	2.45355942477052, 2.00926421340272, 2.32852533322747, 2.74857637896893, 2.69577818003711, 2.57799223450425, 2.53310191036781, 2.19118968491556, 2.41986845681417, 2.45164484927882
C1	GSE39110_UNTREATED_VS_IL2_TREATED_CD8_TCELL_DAY6_POST_IMMUNIZATION_UP	Patient 1_Peak CAR T, Patient 1_Preinfusion, Patient 1_Product, Patient 3_Peak, Patient 3_Peak CAR T, Patient 3_Preinfusion, Patient 4_Peak, Patient 4_Peak CAR T, Patient 4_Preinfusion, Patient 4_Product	2.02558916209723, 2.39879496089172, 2.18326609550105, 2.67942243108332, 2.77115923892294, 1.99275133145459, 2.13768803032592, 2.7207529304736, 2.49991980407829, 2.08235971595483
C1	GSE40068_CXCR5NEG_BCL6NEG_CD4_TCELL_VS_CXCR5POS_BCL6NEG_TFH_DN	Patient 1_Peak CAR T, Patient 1_Preinfusion, Patient 1_Product, Patient 2_Preinfusion, Patient 3_Peak, Patient 3_Peak CAR T, Patient 3_Preinfusion, Patient 4_Peak CAR T, Patient 4_Preinfusion, Patient 4_Product	2.46190026666014, 2.21338765577408, 2.11783976681821, 1.81177722950693, 2.52928058542301, 2.1250015981848, 2.36188793545696, 2.89961779024245, 2.54654162840505, 2.23983109959068
C1	GSE40274_FOXP3_VS_FOXP3_AND_LEF1_TRANSDUCED_ACTIVATED_CD4_TCELL_UP	Patient 1_Peak CAR T, Patient 1_Preinfusion, Patient 2_Preinfusion, Patient 3_Peak, Patient 3_Peak CAR T, Patient 3_Preinfusion, Patient 4_Day 21, Patient 4_Peak, Patient 4_Peak CAR T, Patient 4_Preinfusion	2.71587435446081, 2.72420655181043, 2.16734611505007, 2.58645631940896, 2.68269837703546, 2.97339900429182, 2.27195000309493, 2.44524793208047, 2.39142429394939, 2.83818892084387
C1	GSE4748_LPS_VS_LPS_AND_CYANOBACTERIUM_LPSLIKE_STIM_DC_3H_UP	Patient 1_Peak CAR T, Patient 1_Preinfusion, Patient 1_Product, Patient 2_Preinfusion, Patient 3_Peak, Patient 3_Preinfusion, Patient 4_Day 21, Patient 4_Peak CAR T, Patient 4_Preinfusion, Patient 4_Product	2.97015176885094, 2.61642420136761, 2.53731886132967, 2.85562638070047, 2.31760863427094, 2.45251154303761, 2.39837350559886, 2.71713799035688, 2.50361334555071, 2.10253635928865
C1	GSE5679_RARA_AGONIST_AM580_VS_AM580_AND_ROSIGLITAZONE_TREATED_DC_DN	Patient 1_Peak CAR T, Patient 1_Preinfusion, Patient 2_Preinfusion, Patient 3_Peak, Patient 3_Peak CAR T, Patient 3_Preinfusion, Patient 4_Day 21, Patient 4_Peak, Patient 4_Peak CAR T, Patient 4_Preinfusion	3.0830570672512, 2.93058109654595, 3.30938969464012, 2.84246858440842, 2.92163995806633, 2.64576416479987, 2.39342285852749, 2.5254914466538, 2.83279579248636, 2.48071251885479
C1	GSE7460_CD8_TCELL_VS_CD4_TCELL_ACT_UP	Patient 1_Peak CAR T, Patient 1_Preinfusion, Patient 1_Product, Patient 2_Preinfusion, Patient 2_Product, Patient 3_Peak CAR T, Patient 3_Preinfusion, Patient 4_Peak CAR T, Patient 4_Preinfusion, Patient 4_Product	2.40638005200231, 3.04740438707548, 2.49856002430908, 1.97636883302994, 2.18326429369694, 2.43724635865767, 2.84506910373149, 2.23473008444086, 2.59746329446897, 2.44877419357249
C1	HAY_BONE_MARROW_CD8_T_CELL	Patient 1_Peak CAR T, Patient 1_Preinfusion, Patient 1_Product, Patient 2_Preinfusion, Patient 3_Peak CAR T, Patient 3_Preinfusion, Patient 3_Product, Patient 4_Peak CAR T, Patient 4_Preinfusion, Patient 4_Product	1.90321849679258, 3.66627291181745, 2.34360481769945, 3.1360041271109, 1.7178713864049, 3.0249492624634, 1.98912507733484, 2.55547008849489, 2.81354791107364, 1.79741379913296
C1	MANNO_MIDBRAIN_NEUROTYPES_HPERIC	Patient 1_Peak CAR T, Patient 1_Preinfusion, Patient 1_Product, Patient 2_Preinfusion, Patient 3_Peak, Patient 3_Peak CAR T, Patient 3_Preinfusion, Patient 4_Day 21, Patient 4_Peak, Patient 4_Peak CAR T	2.6761773285777, 2.76400768198005, 1.90208951841582, 1.78756097567045, 1.76773444078592, 1.6467765587567, 1.56839382597432, 2.04566593156757, 1.65417462496575, 2.54509008688855
C1	MODULE_575	Patient 1_Peak CAR T, Patient 1_Preinfusion, Patient 2_Preinfusion, Patient 3_Peak, Patient 3_Peak CAR T, Patient 3_Preinfusion, Patient 3_Product, Patient 4_Day 21, Patient 4_Peak CAR T, Patient 4_Preinfusion	2.14908252772122, 2.0786254612152, 1.97834326193214, 1.91330109531141, 2.07652826107575, 2.00133377806686, 1.84933233720123, 1.93031000413252, 2.08496307737964, 2.25848730802822
C1	SCHERER_PBMC_APSV_WETVAX_AGE_18_32YO_5_TO_7DY_DN	Patient 1_Peak CAR T, Patient 1_Preinfusion, Patient 1_Product, Patient 2_Preinfusion, Patient 2_Product, Patient 3_Peak, Patient 3_Peak CAR T, Patient 3_Preinfusion, Patient 4_Peak CAR T, Patient 4_Preinfusion	2.22974773259894, 2.35177061177163, 2.42547889552109, 2.53875482159009, 1.90628418163265, 1.90679321008942, 3.19229560478495, 2.57780061121533, 2.06546805545312, 2.15759251794828
C1	ZHONG_PFC_MAJOR_TYPES_MICROGLIA	Patient 1_Peak CAR T, Patient 1_Preinfusion, Patient 1_Product, Patient 2_Preinfusion, Patient 3_Peak CAR T, Patient 3_Preinfusion, Patient 3_Product, Patient 4_Day 21, Patient 4_Peak CAR T, Patient 4_Preinfusion	3.31545440755873, 3.57788527154193, 2.59572432450375, 2.8512033991774, 2.05585388198992, 2.00153319634826, 2.03035176918244, 2.07838917396841, 2.70065046687066, 1.84199962666529
C1	AIZARANI_LIVER_C23_KUPFFER_CELLS_3	Patient 1_Peak CAR T, Patient 1_Preinfusion, Patient 1_Product, Patient 2_Product, Patient 3_Peak, Patient 3_Peak CAR T, Patient 3_Preinfusion, Patient 4_Peak CAR T, Patient 4_Product	2.19603013940141, 2.10732240425502, 1.92801364872376, 1.79966355361653, 1.78399123941808, 1.87865185893231, 1.64973368747809, 1.93200162025193, 1.86314629441958
C1	DESCARTES_FETAL_LIVER_LYMPHOID_CELLS	Patient 1_Peak CAR T, Patient 1_Preinfusion, Patient 1_Product, Patient 2_Preinfusion, Patient 2_Product, Patient 3_Peak CAR T, Patient 3_Preinfusion, Patient 4_Peak CAR T, Patient 4_Preinfusion	2.93703952958089, 3.11411171059984, 2.71241931385744, 2.23836678796383, 1.93710485673711, 2.27085542660865, 2.35376053834914, 2.29123771861383, 2.21374889219369
C1	FLETCHER_PBMC_BCG_10W_INFANT_PPD_STIMULATED_VS_UNSTIMULATED_10W_DN	Patient 1_Day 7, Patient 1_Preinfusion, Patient 1_Product, Patient 2_Product, Patient 3_Peak, Patient 3_Peak CAR T, Patient 3_Preinfusion, Patient 4_Peak CAR T, Patient 4_Preinfusion	2.70638427612481, 2.23293522400184, 1.85406636182445, 2.21427920358218, 2.1670207523002, 3.15918650479649, 2.42094758452228, 1.93805714357588, 1.89031332222071
C1	GOCC_ENDOSOME	Patient 1_Peak CAR T, Patient 1_Preinfusion, Patient 1_Preinfusion, Patient 3_Peak, Patient 3_Preinfusion, Patient 3_Preinfusion, Patient 4_Peak CAR T, Patient 4_Peak CAR T, Patient 4_Preinfusion	2.00547453769896, 2.65400877362652, 2.63442642636416, 1.87582057656229, 1.89759917659679, 1.88857829363684, 2.02055371226847, 2.01274151308316, 1.98040148816952
C1	GSE14415_INDUCED_TREG_VS_FOXP3_KO_INDUCED_TREG_DN	Patient 1_Peak CAR T, Patient 1_Preinfusion, Patient 1_Product, Patient 2_Preinfusion, Patient 3_Peak, Patient 3_Preinfusion, Patient 4_Peak CAR T, Patient 4_Preinfusion, Patient 4_Product	2.57101541727828, 2.59329002975625, 2.13802405573456, 1.73994282273587, 2.61901560224633, 2.4846871042058, 2.64422384013023, 2.39364212149876, 2.17314622922586
C1	GSE15330_MEGAKARYOCYTE_ERYTHROID_VS_GRANULOCYTE_MONOCYTE_PROGENITOR_UP	Patient 1_Peak CAR T, Patient 1_Preinfusion, Patient 1_Product, Patient 3_Peak, Patient 3_Peak CAR T, Patient 3_Preinfusion, Patient 4_Day 21, Patient 4_Peak CAR T, Patient 4_Preinfusion	2.25840244297349, 2.31430167522458, 2.3094184199034, 2.18533226196009, 2.53053669978096, 2.14849129517973, 2.3357697881438, 2.54494028430641, 2.28199258622274
C1	GSE21063_CTRL_VS_ANTI_IGM_STIM_BCELL_NFATC1_KO_16H_UP	Patient 1_Peak CAR T, Patient 1_Preinfusion, Patient 1_Product, Patient 2_Preinfusion, Patient 3_Peak, Patient 3_Peak CAR T, Patient 3_Preinfusion, Patient 4_Peak CAR T, Patient 4_Product	2.65483745398414, 2.98188068324366, 2.23300340923642, 1.89798856911133, 2.39395837210111, 2.46031221368342, 2.16167743053929, 2.25257087255819, 2.0302349614165
C1	GSE22886_CD8_TCELL_VS_BCELL_NAIVE_UP	Patient 1_Peak CAR T, Patient 1_Preinfusion, Patient 1_Product, Patient 2_Preinfusion, Patient 3_Peak, Patient 3_Peak CAR T, Patient 3_Preinfusion, Patient 4_Peak CAR T, Patient 4_Preinfusion	2.48567224250442, 2.63518185378895, 2.31769807639831, 1.86231133720181, 2.14529010442546, 2.67787106300295, 2.34902522437832, 2.47010808078714, 2.16767588276709
C1	GSE24026_PD1_LIGATION_VS_CTRL_IN_ACT_TCELL_LINE_UP	Patient 1_Peak CAR T, Patient 1_Preinfusion, Patient 1_Product, Patient 3_Peak, Patient 3_Peak CAR T, Patient 3_Preinfusion, Patient 4_Day 21, Patient 4_Peak, Patient 4_Peak CAR T	2.72665830854474, 2.4574958712134, 2.06229922117682, 2.99119978593349, 4.22714288375577, 2.50930168560822, 2.17952994754815, 2.04260956034563, 1.6650845337617
C1	GSE30083_SP3_VS_SP4_THYMOCYTE_DN	Patient 1_Peak CAR T, Patient 1_Preinfusion, Patient 2_Preinfusion, Patient 3_Peak, Patient 3_Peak CAR T, Patient 3_Preinfusion, Patient 4_Day 21, Patient 4_Peak CAR T, Patient 4_Preinfusion	2.60439457181854, 3.27481399177006, 2.56854045512922, 2.29900159954022, 2.0705670390939, 3.00257788501073, 2.42572533410893, 2.81291347800783, 2.56455342410707
C1	GSE30153_LUPUS_VS_HEALTHY_DONOR_BCELL_DN	Patient 1_Peak CAR T, Patient 1_Preinfusion, Patient 2_Preinfusion, Patient 3_Peak, Patient 3_Preinfusion, Patient 4_Day 21, Patient 4_Peak, Patient 4_Peak CAR T, Patient 4_Preinfusion	2.15320597587968, 2.57457787259953, 2.21465758781868, 2.32968411003031, 2.41525093093033, 2.17717705412904, 2.20721905956523, 2.16619826905581, 2.09635507066978
C1	GSE40274_CTRL_VS_FOXP3_AND_GATA1_TRANSDUCED_ACTIVATED_CD4_TCELL_UP	Patient 1_Peak CAR T, Patient 1_Preinfusion, Patient 2_Preinfusion, Patient 3_Peak, Patient 3_Peak CAR T, Patient 3_Preinfusion, Patient 4_Day 21, Patient 4_Peak CAR T, Patient 4_Preinfusion	2.37267099504419, 2.71121675217453, 2.00651280248185, 2.6896119145086, 2.4109224528276, 2.72555304237816, 2.12418595148377, 2.06853838852537, 2.40934618143426
C1	GSE7852_LN_VS_THYMUS_TCONV_UP	Patient 1_Peak CAR T, Patient 1_Preinfusion, Patient 2_Preinfusion, Patient 3_Peak, Patient 3_Preinfusion, Patient 4_Day 21, Patient 4_Peak CAR T, Patient 4_Preinfusion, Patient 4_Product	2.98356391386034, 2.73886169551196, 3.08115395487067, 2.47079231635644, 2.90960200928707, 2.44515954236417, 2.46655681236983, 2.77019380981672, 2.07592937693978
C1	GSE9650_NAIVE_VS_MEMORY_CD8_TCELL_DN	Patient 1_Peak CAR T, Patient 1_Preinfusion, Patient 1_Product, Patient 3_Peak, Patient 3_Peak CAR T, Patient 3_Preinfusion, Patient 4_Peak CAR T, Patient 4_Preinfusion, Patient 4_Product	1.85164775328985, 2.68719207789932, 2.39615577724916, 2.45803425583598, 2.59250249406052, 2.35837467367196, 2.1876918773301, 2.23277160610744, 2.34792676574146
C1	HARALAMBIEVA_PBMC_M_M_R_II_AGE_11_22YO_VACCINATED_VS_UNVACCINATED_7YR_DN	Patient 1_Peak CAR T, Patient 1_Preinfusion, Patient 1_Product, Patient 2_Preinfusion, Patient 3_Peak, Patient 3_Peak CAR T, Patient 3_Preinfusion, Patient 4_Day 21, Patient 4_Peak CAR T	2.53980470075416, 1.7002328702439, 2.25823658937603, 3.22651955594265, 2.31714697590684, 3.12465058672442, 2.06018611069923, 1.92022312490108, 2.30167014678761
C1	KAECH_NAIVE_VS_DAY15_EFF_CD8_TCELL_DN	Patient 1_Peak CAR T, Patient 1_Preinfusion, Patient 1_Product, Patient 3_Peak, Patient 3_Peak CAR T, Patient 3_Preinfusion, Patient 4_Peak CAR T, Patient 4_Preinfusion, Patient 4_Product	1.80822954123401, 2.53115855007675, 2.31806915417561, 2.50337151299065, 2.74387294721868, 2.06004951739227, 2.15939667185585, 2.48211535686247, 2.23677570817423
C1	KEGG_AUTOIMMUNE_THYROID_DISEASE	Patient 1_Preinfusion, Patient 1_Product, Patient 2_Peak, Patient 2_Preinfusion, Patient 3_Peak, Patient 3_Preinfusion, Patient 4_Peak CAR T, Patient 4_Preinfusion, Patient 4_Product	2.63543584545366, 1.68174351715262, 1.64692356931061, 2.04455550394864, 2.52251003824723, 2.45546908987071, 2.10827094743392, 2.30863561236499, 1.64698955869923
C1	LI_PBMC_MENACTRA_AGE_18_45YO_CORRELATED_WITH_ANTI_DT_ANTIBODY_3DY_NEGATIVE	Patient 1_Peak CAR T, Patient 1_Preinfusion, Patient 1_Product, Patient 3_Peak, Patient 3_Preinfusion, Patient 3_Product, Patient 4_Peak CAR T, Patient 4_Preinfusion, Patient 4_Product	1.67837732185779, 2.04144754596394, 1.77978761364408, 1.88034343408518, 1.8466053195924, 1.64343169469172, 2.18346567898692, 2.05013310173631, 1.63524347638458
C1	LI_PBMC_ZOSTAVAX_AGE_25_40_AND_60_79YO_1DY_UP	Patient 1_Peak CAR T, Patient 1_Preinfusion, Patient 2_Preinfusion, Patient 3_Peak, Patient 3_Peak CAR T, Patient 3_Preinfusion, Patient 4_Peak, Patient 4_Peak CAR T, Patient 4_Preinfusion	1.72200486692137, 1.70965571734475, 1.68390129563616, 1.71704823986518, 1.73106378801652, 1.70944455574803, 1.60559243114684, 1.81101440230265, 1.70008141269131
C1	MODULE_46	Patient 1_Peak CAR T, Patient 1_Preinfusion, Patient 1_Product, Patient 2_Preinfusion, Patient 3_Peak CAR T, Patient 3_Preinfusion, Patient 4_Day 21, Patient 4_Peak CAR T, Patient 4_Preinfusion	2.85055957786509, 3.89216515345227, 2.7731438292339, 2.65486345513872, 3.01919170506956, 1.90465411617614, 2.09117671528626, 2.54970443097758, 2.23115478216691
C1	MODULE_64	Patient 1_Peak CAR T, Patient 1_Preinfusion, Patient 1_Product, Patient 2_Preinfusion, Patient 3_Peak CAR T, Patient 3_Preinfusion, Patient 4_Day 21, Patient 4_Peak CAR T, Patient 4_Preinfusion	2.94593883688188, 3.70102673006893, 2.69056508608482, 3.17409997734291, 3.07315685190904, 2.4424699373742, 1.86211696217074, 2.77667710738282, 2.31380950187198
C1	MODULE_75	Patient 1_Peak CAR T, Patient 1_Preinfusion, Patient 1_Product, Patient 2_Preinfusion, Patient 3_Peak CAR T, Patient 3_Preinfusion, Patient 4_Day 21, Patient 4_Peak CAR T, Patient 4_Preinfusion	2.89175980023458, 3.82938837318112, 2.86417367660115, 2.63888572959695, 3.20471296596431, 2.02789361544668, 2.07394208767594, 2.57876546162074, 2.21986734251519
C1	RUBENSTEIN_SKELETAL_MUSCLE_MYELOID_CELLS	Patient 1_Peak CAR T, Patient 1_Preinfusion, Patient 2_Preinfusion, Patient 3_Peak, Patient 3_Peak CAR T, Patient 3_Preinfusion, Patient 3_Product, Patient 4_Peak, Patient 4_Peak CAR T	2.33410205353249, 1.5192117286835, 2.77252677120239, 1.80593878829732, 4.27209116413233, 1.82072141472869, 1.97140052547493, 2.29642543306599, 1.87289194561605
C1	TRAVAGLINI_LUNG_ALVEOLAR_EPITHELIAL_TYPE_1_CELL	Patient 1_Peak CAR T, Patient 1_Preinfusion, Patient 1_Product, Patient 2_Preinfusion, Patient 2_Product, Patient 3_Peak, Patient 3_Peak CAR T, Patient 3_Preinfusion, Patient 4_Peak CAR T	1.95277931326578, 2.83058899243068, 1.81020779891231, 1.70967204069641, 1.70151102280963, 1.83096496905256, 1.80996778886515, 1.65451703329953, 2.36368985760389
C1	ZAK_PBMC_MRKAD5_HIV_1_GAG_POL_NEF_AGE_20_50YO_1DY_DN	Patient 1_Peak CAR T, Patient 1_Preinfusion, Patient 1_Product, Patient 2_Product, Patient 3_Preinfusion, Patient 3_Product, Patient 4_Peak CAR T, Patient 4_Preinfusion, Patient 4_Product	1.97944902496339, 1.92410987742398, 1.90226209141576, 2.07611670677555, 2.21575175871035, 2.12981156524917, 2.25043722351482, 2.00666091713551, 1.9255497190753
C1	ANDERSON_BLOOD_CN54GP140_ADJUVANTED_WITH_GLA_AF_AGE_18_45YO_HIGH_IGM_RESPONDERS_3DY_7D_DN	Patient 1_Peak CAR T, Patient 1_Preinfusion, Patient 2_Preinfusion, Patient 3_Peak, Patient 3_Peak CAR T, Patient 3_Preinfusion, Patient 4_Peak CAR T, Patient 4_Preinfusion	1.83354352105738, 1.70428225778264, 1.79646558042472, 1.70373778839335, 1.68826276029083, 1.70489816065295, 1.93462080718138, 1.69657247272703
C1	CUI_DEVELOPING_HEART_C8_MACROPHAGE	Patient 1_Peak CAR T, Patient 1_Preinfusion, Patient 1_Product, Patient 2_Preinfusion, Patient 3_Peak, Patient 3_Peak CAR T, Patient 3_Preinfusion, Patient 4_Peak CAR T	2.70843539568762, 3.41467533480558, 2.13571328364128, 3.16486486794578, 1.74166054679392, 2.48473989730995, 2.67771803444796, 2.825665207087
C1	DESCARTES_FETAL_PANCREAS_MYELOID_CELLS	Patient 1_Peak CAR T, Patient 1_Preinfusion, Patient 1_Product, Patient 2_Preinfusion, Patient 2_Product, Patient 3_Preinfusion, Patient 4_Peak CAR T, Patient 4_Preinfusion	1.80136999787363, 1.73949007395855, 1.8487703098938, 1.63814431786065, 1.34768657311888, 1.98563110315579, 1.70016154699564, 1.91366695274252
C1	DESCARTES_FETAL_SPLEEN_LYMPHOID_CELLS	Patient 1_Peak CAR T, Patient 1_Preinfusion, Patient 1_Product, Patient 2_Preinfusion, Patient 2_Product, Patient 3_Preinfusion, Patient 4_Peak CAR T, Patient 4_Preinfusion	2.44707254096246, 2.68868439189287, 2.28579141790933, 2.57574840441633, 1.59785626450789, 3.40165402288348, 2.0575106783844, 2.32996776029477
C1	DESCARTES_FETAL_STOMACH_LYMPHOID_CELLS	Patient 1_Peak CAR T, Patient 1_Preinfusion, Patient 1_Product, Patient 2_Preinfusion, Patient 2_Product, Patient 3_Peak CAR T, Patient 3_Preinfusion, Patient 4_Peak CAR T	3.18265847900242, 2.51344098722004, 2.58804722554826, 3.14261235122728, 1.96328194939572, 2.09761448713767, 2.20124385361601, 2.3603968302549
C1	DURANTE_ADULT_OLFACTORY_NEUROEPITHELIUM_CD4_T_CELLS	Patient 1_Peak CAR T, Patient 1_Preinfusion, Patient 1_Product, Patient 2_Preinfusion, Patient 2_Product, Patient 3_Peak CAR T, Patient 3_Preinfusion, Patient 4_Peak CAR T	1.93939429665132, 2.65118457247566, 2.56064060754139, 3.13474410227625, 1.93710485673711, 2.18092015334131, 2.0666342999686, 2.43850003544152
C1	FAN_EMBRYONIC_CTX_BIG_GROUPS_BRAIN_ENDOTHELIAL	Patient 1_Peak CAR T, Patient 1_Preinfusion, Patient 2_Day 24 CART, Patient 3_Peak, Patient 3_Peak CAR T, Patient 3_Preinfusion, Patient 4_Peak, Patient 4_Peak CAR T	1.88062232122069, 2.81197031316365, 1.40866206406642, 2.18116923708994, 2.30535300140652, 1.74916206490366, 1.73489968261502, 1.96513391379991
C1	FAN_EMBRYONIC_CTX_BIG_GROUPS_MICROGLIA	Patient 1_Peak CAR T, Patient 1_Preinfusion, Patient 1_Product, Patient 2_Preinfusion, Patient 3_Peak CAR T, Patient 3_Product, Patient 4_Day 21, Patient 4_Peak CAR T	2.86554832174493, 3.23700104391259, 2.35606025420298, 2.26830047379425, 2.23886256846184, 2.03038545815853, 1.72420645760735, 2.4529370133678
C1	FAN_OVARY_CL13_MONOCYTE_MACROPHAGE	Patient 1_Peak CAR T, Patient 1_Preinfusion, Patient 1_Product, Patient 2_Peak2, Patient 3_Peak, Patient 3_Peak CAR T, Patient 3_Preinfusion, Patient 4_Peak CAR T	1.6419246935315, 2.07875869101232, 2.00228717108633, 2.20548645064258, 2.10024175666193, 3.05158482670788, 1.52673550777812, 1.71556988041203
C1	FULLER_PBMC_F_TULARENSIS_VACCINE_LVS_AGE_22_54YO_18HR_TO_48HR_EARLY_DN	Patient 1_Peak CAR T, Patient 1_Preinfusion, Patient 2_Preinfusion, Patient 3_Peak, Patient 3_Peak CAR T, Patient 3_Preinfusion, Patient 4_Peak CAR T, Patient 4_Preinfusion	2.00144888922765, 2.45305846226076, 2.75907954982149, 2.10405845602127, 1.96574196036536, 2.30568866852073, 2.05159225750757, 2.1665940615882
C1	GNF2_ITGB2	Patient 1_Peak CAR T, Patient 1_Preinfusion, Patient 1_Product, Patient 2_Preinfusion, Patient 3_Preinfusion, Patient 4_Peak CAR T, Patient 4_Preinfusion, Patient 4_Product	1.91049460687697, 2.54407696579874, 1.9500993826482, 2.7410655104857, 2.30187495102704, 2.4452610717085, 1.80895144323116, 1.61730712342466
C1	GOCC_COPII_COATED_ER_TO_GOLGI_TRANSPORT_VESICLE	Patient 1_Preinfusion, Patient 1_Preinfusion, Patient 2_Day 24 CART, Patient 2_Day 24 CART, Patient 3_Peak, Patient 3_Preinfusion, Patient 3_Preinfusion, Patient 4_Preinfusion	2.27967408546061, 2.26443413483471, 1.41652337300006, 1.40441200862498, 2.03241842580397, 2.34269301406913, 2.31007334908831, 2.0252949115014
C1	GOCC_ENDOSOME_LUMEN	Patient 1_Preinfusion, Patient 1_Preinfusion, Patient 2_Peak2, Patient 3_Preinfusion, Patient 3_Preinfusion, Patient 4_Peak CAR T, Patient 4_Peak CAR T, Patient 4_Preinfusion	2.10651218377909, 2.10222545373788, 1.83257461484299, 1.65245546248842, 1.65167373979882, 1.76998572965508, 1.7689887949384, 1.91515476978066
C1	GOCC_ER_TO_GOLGI_TRANSPORT_VESICLE_MEMBRANE	Patient 1_Preinfusion, Patient 1_Preinfusion, Patient 2_Day 24 CART, Patient 2_Day 24 CART, Patient 3_Peak, Patient 3_Preinfusion, Patient 3_Preinfusion, Patient 4_Preinfusion	2.4000925436987, 2.3662648892179, 1.41652337300006, 1.40441200862498, 2.03241842580397, 2.34979352707416, 2.32311246066731, 2.0252949115014
C1	GOCC_MHC_PROTEIN_COMPLEX	Patient 1_Preinfusion, Patient 1_Preinfusion, Patient 2_Day 24 CART, Patient 2_Day 24 CART, Patient 3_Peak, Patient 3_Peak CAR T, Patient 3_Preinfusion, Patient 3_Preinfusion	2.58384320165344, 2.55973296766094, 1.41652337300006, 1.40441200862498, 2.10961301963407, 2.06071301863274, 2.34979352707416, 2.32311246066731
C1	GOCC_PHAGOCYTIC_VESICLE_MEMBRANE	Patient 1_Preinfusion, Patient 1_Preinfusion, Patient 2_Day 24 CART, Patient 2_Day 24 CART, Patient 2_Peak2, Patient 3_Preinfusion, Patient 3_Preinfusion, Patient 4_Peak CAR T	2.71748138526299, 2.69595464530387, 1.41652337300006, 1.40441200862498, 2.1474171913111, 2.1580431588233, 2.13818285657876, 1.83482748047006
C1	GOMF_CHEMOKINE_ACTIVITY	Patient 1_Preinfusion, Patient 1_Preinfusion, Patient 1_Product, Patient 1_Product, Patient 3_Peak, Patient 3_Peak, Patient 3_Product, Patient 3_Product	1.6900893074295, 1.68930197742411, 2.05215960337631, 2.04801281961796, 1.68850681520798, 1.6751181087457, 1.83298913558341, 1.81797072558962
C1	GOMF_MOLECULAR_TRANSDUCER_ACTIVITY	Patient 1_Preinfusion, Patient 1_Preinfusion, Patient 1_Product, Patient 1_Product, Patient 2_Preinfusion, Patient 2_Preinfusion, Patient 4_Peak CAR T, Patient 4_Peak CAR T	2.92371813319553, 2.89332053754018, 2.4394419935638, 2.41986557453624, 2.82377768065506, 2.81066819234425, 2.81565722989212, 2.81493587675202
C1	GSE10325_CD4_TCELL_VS_BCELL_UP	Patient 1_Peak CAR T, Patient 1_Preinfusion, Patient 1_Product, Patient 2_Preinfusion, Patient 3_Peak CAR T, Patient 3_Preinfusion, Patient 4_Peak CAR T, Patient 4_Product	2.04900305493652, 2.77903520818379, 2.86259123125797, 1.94399806703406, 2.34805471623562, 2.26625876363607, 2.19693888338337, 2.20168930181514
C1	GSE13946_CTRL_VS_DSS_COLITIS_GD_TCELL_FROM_COLON_UP	Patient 1_Peak CAR T, Patient 1_Preinfusion, Patient 1_Product, Patient 3_Peak, Patient 3_Preinfusion, Patient 4_Day 21, Patient 4_Peak CAR T, Patient 4_Preinfusion	2.25709328155025, 2.25236277068951, 2.11983147848896, 2.24786302227172, 1.9652493797306, 2.22801245165688, 2.64591609674516, 2.2375709477272
C1	GSE19923_E2A_KO_VS_E2A_AND_HEB_KO_DP_THYMOCYTE_DN	Patient 1_Peak CAR T, Patient 1_Preinfusion, Patient 2_Preinfusion, Patient 3_Peak, Patient 3_Peak CAR T, Patient 3_Preinfusion, Patient 4_Day 21, Patient 4_Peak CAR T	2.35284411970546, 2.33382996754395, 1.94094180033531, 2.27456892482417, 2.47226148010578, 2.45932075181283, 2.35375643376841, 1.77289258164879
C1	GSE24142_DN2_VS_DN3_THYMOCYTE_UP	Patient 1_Peak CAR T, Patient 1_Preinfusion, Patient 1_Product, Patient 2_Product, Patient 3_Peak, Patient 3_Peak CAR T, Patient 3_Preinfusion, Patient 4_Peak CAR T	2.48462939454473, 2.27495980267144, 2.01597653637032, 2.10213152074311, 2.32660264947835, 2.92590460290625, 2.40153309035116, 1.83312730904621
C1	GSE34205_HEALTHY_VS_RSV_INF_INFANT_PBMC_UP	Patient 1_Peak CAR T, Patient 1_Preinfusion, Patient 2_Preinfusion, Patient 3_Preinfusion, Patient 4_Day 21, Patient 4_Peak, Patient 4_Peak CAR T, Patient 4_Preinfusion	2.97448141742158, 2.37195258136295, 3.477842983154, 2.83202229931393, 2.55325915299018, 2.7859401300488, 2.61967446739394, 2.44650907153444
C1	GSE3565_DUSP1_VS_WT_SPLENOCYTES_UP	Patient 1_Peak CAR T, Patient 1_Preinfusion, Patient 1_Product, Patient 2_Preinfusion, Patient 3_Preinfusion, Patient 4_Peak CAR T, Patient 4_Preinfusion, Patient 4_Product	2.55404025969776, 3.14173540925408, 2.49112958405154, 2.22389260810773, 2.14249760813621, 2.89049367734677, 2.248880096031, 2.28498749967549
C1	GSE3982_BCELL_VS_BASOPHIL_DN	Patient 1_Peak CAR T, Patient 1_Preinfusion, Patient 2_Preinfusion, Patient 3_Peak, Patient 3_Peak CAR T, Patient 3_Preinfusion, Patient 4_Day 21, Patient 4_Peak CAR T	2.20527064762216, 2.82239200564652, 2.10765870283318, 2.4198795596307, 2.26494763760605, 2.68314477515601, 2.10980029923028, 2.05584918680421
C1	GSE3982_CENT_MEMORY_CD4_TCELL_VS_NKCELL_DN	Patient 1_Peak CAR T, Patient 1_Preinfusion, Patient 1_Product, Patient 3_Peak CAR T, Patient 3_Preinfusion, Patient 4_Day 21, Patient 4_Peak CAR T, Patient 4_Preinfusion	1.96782849173869, 2.54444440171648, 2.1276596325264, 2.50148075606499, 2.35355064448809, 2.4020993025761, 2.16599730302697, 2.44774960855181
C1	GSE40274_CTRL_VS_FOXP3_AND_LEF1_TRANSDUCED_ACTIVATED_CD4_TCELL_UP	Patient 1_Peak CAR T, Patient 1_Preinfusion, Patient 1_Product, Patient 2_Preinfusion, Patient 3_Peak CAR T, Patient 3_Preinfusion, Patient 4_Peak CAR T, Patient 4_Product	2.08269786745291, 2.4274528465182, 2.27303600483859, 1.85698328505393, 2.19782956008452, 2.31903282430306, 2.18081748036896, 1.91492673378051
C1	GSE7764_NKCELL_VS_SPLENOCYTE_UP	Patient 1_Peak CAR T, Patient 1_Preinfusion, Patient 1_Product, Patient 3_Preinfusion, Patient 4_Day 21, Patient 4_Peak CAR T, Patient 4_Preinfusion, Patient 4_Product	2.46297285678238, 2.44267756149091, 2.04240324430682, 2.17269669219175, 2.11507817702684, 2.92958560428769, 2.53027716162489, 2.10703178616652
C1	KAECH_NAIVE_VS_MEMORY_CD8_TCELL_DN	Patient 1_Preinfusion, Patient 1_Product, Patient 3_Peak, Patient 3_Peak CAR T, Patient 3_Preinfusion, Patient 4_Peak CAR T, Patient 4_Preinfusion, Patient 4_Product	2.70125573697383, 2.43607275206937, 2.56779561938813, 2.60164361021781, 2.305226064278, 2.16670136218385, 2.31699758015685, 2.26380522965088
C1	KEGG_ALLOGRAFT_REJECTION	Patient 1_Preinfusion, Patient 1_Product, Patient 2_Peak, Patient 2_Preinfusion, Patient 3_Peak, Patient 3_Preinfusion, Patient 4_Peak CAR T, Patient 4_Preinfusion	2.74357929352054, 1.74801988543189, 1.64692356931061, 2.03511224621465, 2.52251003824723, 2.61818256589105, 2.1034406640466, 2.4376515355169
C1	KEGG_GRAFT_VERSUS_HOST_DISEASE	Patient 1_Peak CAR T, Patient 1_Preinfusion, Patient 2_Preinfusion, Patient 3_Peak, Patient 3_Peak CAR T, Patient 3_Preinfusion, Patient 4_Peak CAR T, Patient 4_Preinfusion	2.22515838959103, 2.85145526198088, 2.03511224621465, 2.69456138431535, 2.16338094305199, 2.78571661229496, 2.30978808231053, 2.66217210291255
C1	KEGG_NATURAL_KILLER_CELL_MEDIATED_CYTOTOXICITY	Patient 1_Peak CAR T, Patient 1_Preinfusion, Patient 1_Product, Patient 2_Preinfusion, Patient 3_Preinfusion, Patient 4_Day 21, Patient 4_Peak CAR T, Patient 4_Preinfusion	2.67619550100901, 2.78655325123339, 2.21473302861198, 2.36992350303235, 2.9834922982953, 2.29290517352789, 2.41051764398681, 2.52394461447361
C1	MANNO_MIDBRAIN_NEUROTYPES_HENDO	Patient 1_Peak CAR T, Patient 1_Preinfusion, Patient 1_Product, Patient 2_Day 24 CART, Patient 2_Preinfusion, Patient 3_Peak CAR T, Patient 3_Preinfusion, Patient 4_Peak CAR T	2.43047286801432, 2.94325590974584, 2.24115026573462, 1.40866206406642, 2.01896342959348, 2.0556344025119, 1.62345235675437, 2.16221094611747
C1	MODULE_117	Patient 1_Peak CAR T, Patient 1_Preinfusion, Patient 1_Product, Patient 2_Product, Patient 3_Peak CAR T, Patient 3_Preinfusion, Patient 4_Peak CAR T, Patient 4_Product	2.23610763587606, 2.866623388517, 2.58501307083475, 1.92836206120817, 2.01111256743796, 2.42861699522782, 1.98752691518061, 2.28244658616376
C1	RUBENSTEIN_SKELETAL_MUSCLE_ENDOTHELIAL_CELLS	Patient 1_Peak CAR T, Patient 1_Preinfusion, Patient 2_Day 24 CART, Patient 2_Preinfusion, Patient 3_Peak, Patient 3_Preinfusion, Patient 4_Peak CAR T, Patient 4_Preinfusion	1.79523535474612, 2.49432988223084, 1.40866206406642, 1.90683419210888, 2.12546545740022, 2.05550865102432, 2.26873130534979, 1.90740607586071
C1	SCHERER_PBMC_APSV_WETVAX_AGE_18_32YO_2_TO_4DY_DN	Patient 1_Day 7, Patient 1_Peak CAR T, Patient 3_Peak, Patient 3_Peak CAR T, Patient 4_Day 21, Patient 4_Peak, Patient 4_Peak CAR T, Patient 4_Preinfusion	2.07564340040179, 1.8831864830717, 1.90547427991094, 2.57423763022934, 1.77704231404686, 2.12134708626801, 1.74218197428876, 1.80367200751907
C1	TRAVAGLINI_LUNG_CAPILLARY_INTERMEDIATE_1_CELL	Patient 1_Peak CAR T, Patient 1_Preinfusion, Patient 1_Product, Patient 2_Preinfusion, Patient 3_Peak, Patient 3_Peak CAR T, Patient 3_Preinfusion, Patient 4_Peak CAR T	2.0774899147511, 2.67288785820451, 1.84977453246676, 2.37067554309164, 1.95338837844184, 1.93665719353867, 2.15080439174213, 2.09266373212613
C1	TRAVAGLINI_LUNG_CD8_MEMORY_EFFECTOR_T_CELL	Patient 1_Preinfusion, Patient 1_Product, Patient 2_Preinfusion, Patient 2_Product, Patient 3_Peak CAR T, Patient 3_Preinfusion, Patient 4_Peak CAR T, Patient 4_Preinfusion	2.27772866284281, 2.35756403100159, 2.79940245663797, 1.76764392492163, 2.46559613704017, 3.13953774098308, 1.86185451209391, 2.14471301429097
C1	AIZARANI_LIVER_C28_NK_NKT_CELLS_6	Patient 1_Peak CAR T, Patient 1_Preinfusion, Patient 1_Product, Patient 2_Preinfusion, Patient 2_Product, Patient 3_Preinfusion, Patient 4_Peak CAR T	2.06223740685672, 2.12001456935756, 1.796767975767, 3.29983500297812, 1.54348893772386, 1.63285459721372, 2.53078715276122
C1	AIZARANI_LIVER_C6_KUPFFER_CELLS_2	Patient 1_Peak CAR T, Patient 1_Preinfusion, Patient 1_Product, Patient 2_Preinfusion, Patient 3_Peak, Patient 3_Peak CAR T, Patient 4_Peak CAR T	1.93134600076385, 2.46241113941531, 1.73200552701804, 2.03245664739749, 1.85211656844949, 1.9734039871794, 2.23009317010418
C1	CUI_DEVELOPING_HEART_C4_ENDOTHELIAL_CELL	Patient 1_Peak CAR T, Patient 1_Preinfusion, Patient 2_Preinfusion, Patient 3_Peak CAR T, Patient 3_Preinfusion, Patient 4_Peak CAR T, Patient 4_Preinfusion	1.88091069305062, 2.4636858507143, 1.85880296721353, 1.79712346572627, 1.71674150750015, 2.12103556559357, 1.88290838191904
C1	CUI_DEVELOPING_HEART_C7_MAST_CELL	Patient 1_Peak CAR T, Patient 1_Preinfusion, Patient 1_Product, Patient 2_Preinfusion, Patient 3_Peak CAR T, Patient 3_Preinfusion, Patient 4_Peak CAR T	2.57747438153689, 2.77548530048623, 1.75687007596694, 2.07818248178876, 1.71987080063553, 2.15418349923443, 2.68904610354654
C1	DESCARTES_FETAL_ADRENAL_CSH1_CSH2_POSITIVE_CELLS	Patient 1_Peak CAR T, Patient 1_Preinfusion, Patient 3_Peak, Patient 3_Peak CAR T, Patient 4_Peak, Patient 4_Peak CAR T, Patient 4_Preinfusion	1.64108846614488, 1.74003384225129, 1.64108204554207, 1.73540875524316, 1.78119776458219, 1.60853821929925, 1.6082005589646
C1	DESCARTES_FETAL_CEREBELLUM_VASCULAR_ENDOTHELIAL_CELLS	Patient 1_Peak CAR T, Patient 1_Preinfusion, Patient 2_Preinfusion, Patient 3_Peak, Patient 3_Peak CAR T, Patient 3_Preinfusion, Patient 4_Peak CAR T	2.13795802614476, 2.68427873603818, 1.67915718220635, 1.79636095150716, 2.23348816958861, 2.23287516008057, 2.3795144380529
C1	DESCARTES_FETAL_MUSCLE_LYMPHOID_CELLS	Patient 1_Peak CAR T, Patient 1_Preinfusion, Patient 1_Product, Patient 2_Preinfusion, Patient 2_Product, Patient 3_Preinfusion, Patient 4_Peak CAR T	2.84241449837832, 3.09831231982482, 2.45445313729142, 3.25158919968099, 1.71226060027393, 2.27103573828842, 2.50328533696621
C1	FAN_EMBRYONIC_CTX_BRAIN_NAIVE_LIKE_T_CELL	Patient 1_Peak CAR T, Patient 1_Preinfusion, Patient 1_Product, Patient 2_Preinfusion, Patient 3_Peak CAR T, Patient 3_Preinfusion, Patient 4_Peak CAR T	2.31818280058328, 2.99417367717755, 1.91901808184165, 2.9022096780051, 2.39993926964714, 1.85563198943837, 2.38229713559556
C1	FLETCHER_PBMC_BCG_10W_INFANT_BCG_STIMULATED_VS_UNSTIMULATED_10W_DN	Patient 1_Peak CAR T, Patient 1_Preinfusion, Patient 2_Product, Patient 3_Peak, Patient 3_Peak CAR T, Patient 3_Preinfusion, Patient 4_Peak CAR T	1.87341428763222, 2.25517862171169, 2.18267981585622, 2.39011170713386, 3.20572319049347, 2.14410362024295, 2.24879706795789
C1	GAO_LARGE_INTESTINE_24W_C11_PANETH_LIKE_CELL	Patient 1_Peak CAR T, Patient 1_Preinfusion, Patient 1_Product, Patient 2_Preinfusion, Patient 3_Peak CAR T, Patient 3_Preinfusion, Patient 4_Peak CAR T	2.20444105907102, 2.45863318136538, 2.03971837378188, 1.74953783838374, 1.75147416863066, 1.87655739363864, 1.97031292541773
C1	GNF2_CD97	Patient 1_Peak CAR T, Patient 1_Preinfusion, Patient 2_Preinfusion, Patient 3_Preinfusion, Patient 4_Day 21, Patient 4_Peak CAR T, Patient 4_Preinfusion	2.67502843562999, 2.85241719059192, 3.34792558739922, 2.49146628488523, 1.91545431852757, 2.9355906168606, 2.17422719072437
C1	GNF2_JAK1	Patient 1_Peak CAR T, Patient 1_Preinfusion, Patient 1_Product, Patient 2_Preinfusion, Patient 3_Preinfusion, Patient 4_Day 21, Patient 4_Peak CAR T	2.39239621537175, 2.83130351596292, 1.70480428300899, 3.4465141117132, 2.59880855780622, 2.0161051389498, 3.08316918265013
C1	GNF2_ZAP70	Patient 1_Peak CAR T, Patient 1_Preinfusion, Patient 1_Product, Patient 2_Preinfusion, Patient 3_Preinfusion, Patient 4_Peak CAR T, Patient 4_Preinfusion	1.62619562030311, 2.71623244276764, 1.99567787447703, 2.60150869993672, 2.31699149476512, 2.62974137871973, 1.94563043722601
C1	GOBP_ADAPTIVE_IMMUNE_RESPONSE	Patient 1_Peak CAR T, Patient 1_Preinfusion, Patient 1_Product, Patient 2_Preinfusion, Patient 3_Preinfusion, Patient 4_Peak CAR T, Patient 4_Preinfusion	2.8516821337013, 2.93269630777896, 2.29549778237242, 1.6332750561467, 2.45435048293852, 2.36240419352128, 2.15361007939083
C1	GOCC_RECYCLING_ENDOSOME	Patient 1_Preinfusion, Patient 1_Preinfusion, Patient 2_Preinfusion, Patient 2_Preinfusion, Patient 3_Preinfusion, Patient 4_Peak CAR T, Patient 4_Peak CAR T	2.21291685749493, 2.21280620156218, 2.30797967158369, 2.27069498780308, 1.94099725409962, 1.94339837047315, 1.92169914122467
C1	GOCC_TRANSPORT_VESICLE	Patient 1_Preinfusion, Patient 1_Preinfusion, Patient 2_Preinfusion, Patient 2_Preinfusion, Patient 3_Preinfusion, Patient 4_Peak CAR T, Patient 4_Preinfusion	2.45794925113242, 2.44249373433491, 1.96801749338963, 1.94648313301524, 1.92368418180884, 1.69112381539477, 2.1976250766275
C1	GSE11057_EFF_MEM_VS_CENT_MEM_CD4_TCELL_UP	Patient 1_Peak CAR T, Patient 1_Preinfusion, Patient 1_Product, Patient 3_Preinfusion, Patient 4_Day 21, Patient 4_Peak CAR T, Patient 4_Preinfusion	2.48249967927855, 2.97708506067953, 2.14808847962055, 2.4503551930187, 2.14689317200476, 2.37949853111713, 2.09198405179023
C1	GSE11057_NAIVE_VS_EFF_MEMORY_CD4_TCELL_DN	Patient 1_Peak CAR T, Patient 1_Preinfusion, Patient 1_Product, Patient 3_Peak CAR T, Patient 3_Preinfusion, Patient 4_Peak CAR T, Patient 4_Preinfusion	1.9104463949857, 2.50268040138842, 2.33598654576181, 2.37859572502188, 2.28156064819109, 1.64876103989678, 1.94864778756899
C1	GSE15271_CXCR4_POS_VS_NEG_GC_BCELL_DN	Patient 1_Peak CAR T, Patient 1_Preinfusion, Patient 1_Product, Patient 2_Preinfusion, Patient 3_Preinfusion, Patient 4_Peak CAR T, Patient 4_Preinfusion	2.37099625548015, 2.64297775718006, 2.10320268640443, 2.81012047422671, 2.42715500970322, 2.38489477806463, 2.05532486368826
C1	GSE21670_TGFB_VS_IL6_TREATED_STAT3_KO_CD4_TCELL_DN	Patient 1_Peak CAR T, Patient 1_Preinfusion, Patient 1_Product, Patient 2_Preinfusion, Patient 3_Preinfusion, Patient 4_Peak CAR T, Patient 4_Preinfusion	2.32081515801146, 2.89624146442833, 2.28884258685762, 3.06988317027106, 2.84139333774043, 2.89367296420954, 2.65054129562607
C1	GSE2405_HEAT_KILLED_LYSATE_VS_LIVE_A_PHAGOCYTOPHILUM_STIM_NEUTROPHIL_24H_UP	Patient 1_Peak CAR T, Patient 1_Preinfusion, Patient 3_Peak, Patient 3_Peak CAR T, Patient 3_Preinfusion, Patient 4_Day 21, Patient 4_Peak CAR T	2.25912987205916, 2.20247549088958, 2.65019285903701, 2.87071942705022, 2.25245423223599, 2.32666207619349, 1.86586756826764
C1	GSE26495_PD1HIGH_VS_PD1LOW_CD8_TCELL_DN	Patient 1_Peak CAR T, Patient 1_Preinfusion, Patient 3_Preinfusion, Patient 4_Day 21, Patient 4_Peak, Patient 4_Peak CAR T, Patient 4_Preinfusion	2.05081920422907, 2.68408144103341, 2.67366874496587, 2.33428111337998, 2.48848423918697, 2.43361881911785, 2.16015134559824
C1	GSE29949_CD8_NEG_DC_SPLEEN_VS_MONOCYTE_BONE_MARROW_DN	Patient 1_Peak CAR T, Patient 1_Preinfusion, Patient 1_Product, Patient 3_Peak, Patient 3_Preinfusion, Patient 4_Peak CAR T, Patient 4_Preinfusion	2.10083412005656, 1.9172408791529, 2.05157486692272, 2.26977373498313, 2.01144003720584, 1.7551470510113, 2.12132292166855
C1	GSE32164_ALTERNATIVELY_ACT_M2_VS_CMYC_INHIBITED_MACROPHAGE_UP	Patient 1_Peak CAR T, Patient 1_Preinfusion, Patient 1_Product, Patient 2_Preinfusion, Patient 3_Preinfusion, Patient 4_Peak CAR T, Patient 4_Product	2.50747604608462, 2.48892406955269, 2.43701758541082, 2.41854160677922, 1.96990121758633, 2.20712053440134, 2.08697132561204
C1	GSE32164_RESTING_DIFFERENTIATED_VS_ALTERNATIVELY_ACT_M2_MACROPHAGE_DN	Patient 1_Peak CAR T, Patient 1_Preinfusion, Patient 1_Product, Patient 2_Preinfusion, Patient 3_Preinfusion, Patient 4_Peak CAR T, Patient 4_Preinfusion	2.39109710577932, 2.65401214990573, 2.28650273731614, 2.43529236926525, 1.83306279141695, 2.09196508777838, 2.00876554144829
C1	GSE3720_LPS_VS_PMA_STIM_VD1_GAMMADELTA_TCELL_UP	Patient 1_Peak CAR T, Patient 1_Preinfusion, Patient 1_Product, Patient 3_Peak CAR T, Patient 3_Preinfusion, Patient 4_Peak CAR T, Patient 4_Preinfusion	2.06872262002768, 2.21321270886537, 2.25594235950736, 2.19544737730494, 2.18642840300793, 2.08567250041733, 2.13806920431028
C1	GSE3982_EFF_MEMORY_VS_CENT_MEMORY_CD4_TCELL_UP	Patient 1_Peak CAR T, Patient 1_Preinfusion, Patient 1_Product, Patient 3_Peak CAR T, Patient 3_Preinfusion, Patient 4_Peak CAR T, Patient 4_Preinfusion	2.1410585109897, 2.48561929119651, 2.37230742807143, 3.13109815194615, 1.98045070901642, 2.09815100030906, 2.58134036117795
C1	GSE39820_IL1B_IL6_VS_IL1B_IL6_IL23A_TREATED_CD4_TCELL_UP	Patient 1_Peak CAR T, Patient 1_Preinfusion, Patient 2_Day 24 CART, Patient 2_Preinfusion, Patient 3_Preinfusion, Patient 4_Peak CAR T, Patient 4_Preinfusion	2.02320895758925, 2.79022690614333, 1.41099291587891, 2.30911834060393, 2.32905831525608, 2.33679516769278, 2.19903236354921
C1	GSE46606_DAY1_VS_DAY3_CD40L_IL2_IL5_STIMULATED_BCELL_DN	Patient 1_Peak CAR T, Patient 1_Preinfusion, Patient 3_Preinfusion, Patient 4_Day 21, Patient 4_Peak CAR T, Patient 4_Preinfusion, Patient 4_Product	2.22112594809272, 2.03771714775739, 2.03170177191042, 2.16753585182228, 1.89515478381938, 2.06981560406623, 1.89003986030751
C1	GSE5542_UNTREATED_VS_IFNG_TREATED_EPITHELIAL_CELLS_6H_DN	Patient 1_Peak CAR T, Patient 1_Preinfusion, Patient 1_Product, Patient 2_Preinfusion, Patient 3_Preinfusion, Patient 4_Peak CAR T, Patient 4_Preinfusion	2.42020465413287, 3.04300955247802, 2.09193138141951, 2.15121445621217, 2.85873788372957, 2.31317376668417, 2.33347565638947
C1	GSE6259_FLT3L_INDUCED_DEC205_POS_DC_VS_CD8_TCELL_DN	Patient 1_Peak CAR T, Patient 1_Preinfusion, Patient 1_Product, Patient 3_Preinfusion, Patient 4_Day 21, Patient 4_Peak CAR T, Patient 4_Product	2.39284332657547, 3.11982170957706, 2.25636075211624, 2.06337857668236, 2.3322939284365, 2.21993371168612, 2.13993077911164
C1	GSE7460_FOXP3_MUT_VS_HET_ACT_TCONV_UP	Patient 1_Peak CAR T, Patient 1_Preinfusion, Patient 2_Preinfusion, Patient 3_Peak CAR T, Patient 3_Preinfusion, Patient 4_Day 21, Patient 4_Peak CAR T	2.49991401561133, 2.25514439095341, 2.03481581567361, 2.86361800649566, 2.64146100372697, 2.28816974019996, 2.27021816548008
C1	GSE9601_NFKB_INHIBITOR_VS_PI3K_INHIBITOR_TREATED_HCMV_INF_MONOCYTE_DN	Patient 1_Peak CAR T, Patient 1_Preinfusion, Patient 1_Product, Patient 2_Preinfusion, Patient 3_Preinfusion, Patient 4_Peak CAR T, Patient 4_Product	2.44596822218675, 2.40347693409871, 2.18058231936228, 2.07163760009303, 2.09334715976807, 2.19830553814781, 2.01213289642226
C1	GSE9650_NAIVE_VS_EXHAUSTED_CD8_TCELL_DN	Patient 1_Peak CAR T, Patient 1_Preinfusion, Patient 1_Product, Patient 2_Preinfusion, Patient 3_Preinfusion, Patient 4_Peak CAR T, Patient 4_Preinfusion	2.05295396035312, 2.38236653926103, 2.35945034840723, 1.96097103080853, 2.43529301002459, 2.11335159269662, 2.27701791428062
C1	KEGG_CELL_ADHESION_MOLECULES_CAMS	Patient 1_Preinfusion, Patient 1_Product, Patient 2_Preinfusion, Patient 3_Peak, Patient 3_Preinfusion, Patient 4_Peak CAR T, Patient 4_Preinfusion	2.78265020468432, 1.84219681797326, 2.84888131683529, 1.99964601196192, 2.79453261334176, 2.49847302838148, 2.38926502830245
C1	MAIT_CELL	Patient 1_Peak CAR T, Patient 1_Preinfusion, Patient 1_Product, Patient 2_Preinfusion, Patient 4_Peak CAR T, Patient 4_Preinfusion, Patient 4_Product	1.83342365495601, 2.39780144865622, 1.92647759060539, 2.05077509841373, 1.74591160013458, 1.86695923964028, 1.79177859505005
C1	MANNO_MIDBRAIN_NEUROTYPES_HMGL	Patient 1_Peak CAR T, Patient 1_Preinfusion, Patient 1_Product, Patient 2_Preinfusion, Patient 3_Preinfusion, Patient 3_Product, Patient 4_Peak CAR T	3.70621638201691, 3.6530559643277, 2.08232902043914, 3.40581248845622, 1.82651916055145, 1.83334926430236, 2.78874419586636
C1	MODULE_128	Patient 1_Preinfusion, Patient 1_Product, Patient 2_Product, Patient 3_Peak CAR T, Patient 3_Preinfusion, Patient 4_Preinfusion, Patient 4_Product	2.42979411892843, 2.30907047841156, 1.94915667313347, 2.9818466149519, 2.10960697910606, 2.26840410981154, 2.24464016732581
C1	MODULE_143	Patient 1_Preinfusion, Patient 2_Day 24 CART, Patient 2_Preinfusion, Patient 3_Peak, Patient 3_Preinfusion, Patient 4_Peak CAR T, Patient 4_Preinfusion	2.40201386324378, 1.4005794517495, 2.07229597284968, 2.11879184440752, 2.13053200651934, 1.89117493377073, 1.88996970102804
C1	MODULE_170	Patient 1_Preinfusion, Patient 1_Product, Patient 2_Product, Patient 3_Peak CAR T, Patient 3_Preinfusion, Patient 4_Preinfusion, Patient 4_Product	2.42979411892843, 2.30907047841156, 1.94915667313347, 2.9818466149519, 2.10960697910606, 2.26840410981154, 2.3635388405894
C1	MODULE_171	Patient 1_Peak CAR T, Patient 1_Preinfusion, Patient 1_Product, Patient 3_Peak CAR T, Patient 3_Preinfusion, Patient 4_Peak CAR T, Patient 4_Preinfusion	2.25770043475502, 3.00394225477833, 2.0439611308734, 1.8321953889038, 1.8633220654161, 1.79502435018445, 1.88986493770209
C1	MODULE_27	Patient 1_Preinfusion, Patient 1_Product, Patient 2_Preinfusion, Patient 3_Preinfusion, Patient 4_Day 21, Patient 4_Peak CAR T, Patient 4_Preinfusion	2.99910310350984, 2.28401318722799, 3.00707491872253, 2.10718215389178, 1.85319907247212, 2.57977745663678, 2.00794206163603
C1	MODULE_293	Patient 1_Preinfusion, Patient 2_Day 24 CART, Patient 2_Preinfusion, Patient 3_Peak, Patient 3_Preinfusion, Patient 4_Peak CAR T, Patient 4_Preinfusion	2.40201386324378, 1.4005794517495, 2.07229597284968, 2.11879184440752, 2.13053200651934, 1.89117493377073, 1.88996970102804
C1	MODULE_399	Patient 1_Preinfusion, Patient 3_Peak CAR T, Patient 3_Preinfusion, Patient 3_Product, Patient 4_Day 21, Patient 4_Peak CAR T, Patient 4_Preinfusion	2.51447097564247, 2.14333709003367, 2.08660583309942, 1.88884209042156, 1.9446569541528, 1.97417068552896, 2.39065764924443
C1	MODULE_44	Patient 1_Peak CAR T, Patient 1_Preinfusion, Patient 1_Product, Patient 2_Preinfusion, Patient 3_Peak CAR T, Patient 3_Preinfusion, Patient 4_Peak CAR T	3.06799071516058, 3.03447270089208, 2.18382781556878, 2.90391563178905, 1.92626046763042, 1.77287397717305, 2.06311620705674
C1	MODULE_79	Patient 1_Preinfusion, Patient 1_Product, Patient 2_Product, Patient 3_Peak CAR T, Patient 3_Preinfusion, Patient 4_Preinfusion, Patient 4_Product	2.42979411892843, 2.30907047841156, 1.94915667313347, 2.9818466149519, 2.10960697910606, 2.26840410981154, 2.24464016732581
C1	NAKAYA_PBMC_FLUARIX_FLUVIRIN_AGE_18_50YO_3DY_UP	Patient 1_Peak, Patient 1_Peak CAR T, Patient 2_Peak2, Patient 3_Peak, Patient 3_Peak CAR T, Patient 4_Day 21, Patient 4_Preinfusion	2.18455423087923, 1.77681475696391, 3.05087785356661, 1.92644662547865, 2.30304037491184, 2.06398577662019, 1.77146556451005
C1	PID_CD8_TCR_DOWNSTREAM_PATHWAY	Patient 1_Peak CAR T, Patient 1_Preinfusion, Patient 1_Product, Patient 2_Peak, Patient 3_Preinfusion, Patient 4_Day 21, Patient 4_Peak CAR T	2.567922014973, 2.64855390035329, 2.33713791285676, 1.65287683230286, 2.19148408317918, 2.15721076494776, 2.67575309805313
C1	PID_IL12_2PATHWAY	Patient 1_Peak CAR T, Patient 1_Preinfusion, Patient 1_Product, Patient 3_Peak, Patient 3_Preinfusion, Patient 4_Day 21, Patient 4_Peak CAR T	2.55747646961322, 2.77260073574184, 2.41918205119732, 2.50304807583713, 2.40928705132994, 2.22068324407666, 2.6161859532676
C1	QI_PBMC_ZOSTAVAX_AGE_50_75YO_CORRELATED_WITH_T_CELL_RESPONSES_EXPANSION_AND_CONTRACTION_1D_NOT_INFORMATIVE_OF_LONG_TERM_RESPONSES_POSITIVE	Patient 1_Peak CAR T, Patient 1_Preinfusion, Patient 1_Product, Patient 2_Preinfusion, Patient 3_Peak CAR T, Patient 3_Preinfusion, Patient 4_Preinfusion	1.78330994922884, 1.83550164279832, 1.87436448320062, 2.33712548662818, 1.68984798353993, 1.70043754853994, 1.93816122144836
C1	SOBOLEV_T_CELL_PANDEMRIX_AGE_18_64YO_1DY_UP	Patient 1_Peak CAR T, Patient 1_Preinfusion, Patient 1_Product, Patient 3_Preinfusion, Patient 4_Day 21, Patient 4_Peak CAR T, Patient 4_Preinfusion	1.95865412172896, 2.18862526457461, 2.18662984210238, 2.03109414595346, 2.12948013448717, 2.26654279481048, 2.20532995086294
C1	SOBOLEV_T_CELL_PANDEMRIX_AGE_18_64YO_7DY_DN	Patient 1_Peak CAR T, Patient 1_Preinfusion, Patient 1_Product, Patient 3_Preinfusion, Patient 4_Day 21, Patient 4_Peak CAR T, Patient 4_Preinfusion	1.95865412172896, 2.18862526457461, 2.18662984210238, 2.03109414595346, 2.12948013448717, 2.26654279481048, 2.20532995086294
C1	TRAVAGLINI_LUNG_ALVEOLAR_FIBROBLAST_CELL	Patient 1_Peak CAR T, Patient 1_Preinfusion, Patient 2_Preinfusion, Patient 3_Peak CAR T, Patient 3_Preinfusion, Patient 4_Day 21, Patient 4_Peak CAR T	2.36543238880889, 1.7850222587629, 1.8999926470521, 1.89974907489021, 2.03808150386341, 1.95300099244521, 2.05717107925038
C1	TRAVAGLINI_LUNG_CD4_MEMORY_EFFECTOR_T_CELL	Patient 1_Peak CAR T, Patient 1_Preinfusion, Patient 1_Product, Patient 2_Preinfusion, Patient 2_Product, Patient 3_Preinfusion, Patient 4_Peak CAR T	2.8081142793326, 2.49065367689926, 1.93833752982204, 3.21055789488703, 1.71206232916921, 2.32416499152836, 2.02562860867184
C1	BUSSLINGER_ESOPHAGEAL_DENDRITIC_CELLS	Patient 1_Preinfusion, Patient 1_Product, Patient 3_Peak, Patient 3_Peak CAR T, Patient 3_Product, Patient 4_Peak CAR T	1.89160233483258, 1.93756161639002, 1.79707766283472, 2.06065287611553, 1.88719221613753, 2.23135634744391
C1	BUSSLINGER_ESOPHAGEAL_LATE_SUPRABASAL_CELLS	Patient 1_Peak CAR T, Patient 2_Peak2, Patient 3_Peak, Patient 3_Peak CAR T, Patient 4_Peak, Patient 4_Peak CAR T	1.73370764149427, 2.09130447220505, 2.64958496852208, 3.1667043544911, 2.00455078548051, 1.62295637502841
C1	BUSSLINGER_GASTRIC_IMMATURE_PIT_CELLS	Patient 1_Day 7, Patient 2_Peak2, Patient 3_Peak, Patient 3_Peak CAR T, Patient 4_Peak, Patient 4_Peak CAR T	2.90702935948779, 2.58297924662152, 2.32347831064407, 2.13522528231497, 2.55208343556532, 1.78379682631246
C1	CD4.TRM	Patient 1_Peak CAR T, Patient 1_Preinfusion, Patient 1_Product, Patient 2_Preinfusion, Patient 3_Peak CAR T, Patient 4_Peak CAR T	2.03908958106766, 2.04946662871213, 2.12012337517953, 1.94418678285833, 1.75604185527583, 2.32636138816863
C1	DESCARTES_FETAL_LUNG_SQUAMOUS_EPITHELIAL_CELLS	Patient 1_Peak CAR T, Patient 1_Preinfusion, Patient 2_Preinfusion, Patient 3_Peak, Patient 3_Peak CAR T, Patient 4_Peak CAR T	1.77214086281771, 1.94775288139227, 1.88520066555532, 2.2438473516041, 2.04505422562531, 2.28097282371728
C1	DESCARTES_MAIN_FETAL_EXTRAVILLOUS_TROPHOBLASTS	Patient 1_Peak CAR T, Patient 3_Peak, Patient 3_Peak CAR T, Patient 3_Preinfusion, Patient 4_Day 21, Patient 4_Peak	1.67725215312188, 1.78187528136067, 1.76803763081188, 1.83674684713803, 1.91637079492114, 1.72039290116171
C1	GIAROLA_SILVA_BLOOD_PANDEMRIX_AGE_21_51YO_30DY_UP	Patient 1_Peak CAR T, Patient 1_Preinfusion, Patient 2_Preinfusion, Patient 3_Peak CAR T, Patient 3_Preinfusion, Patient 4_Preinfusion	1.33386487819343, 1.63711401325626, 1.32504257960933, 1.33522186861162, 1.63973316429022, 1.57200510399527
C1	GIAROLA_SILVA_BLOOD_PANDEMRIX_AGE_21_51YO_3DY_UP	Patient 1_Peak CAR T, Patient 1_Preinfusion, Patient 2_Preinfusion, Patient 3_Peak CAR T, Patient 3_Preinfusion, Patient 4_Preinfusion	1.33386487819343, 1.335052949327, 1.32504257960933, 1.33522186861162, 1.33425847507344, 1.32980053192578
C1	GNF2_CASP4	Patient 1_Peak CAR T, Patient 1_Preinfusion, Patient 2_Day 24 CART, Patient 2_Preinfusion, Patient 3_Preinfusion, Patient 4_Peak CAR T	2.37293846252643, 2.28908850791734, 1.41049604601007, 2.39952257819566, 2.05727357370754, 2.01785715846981
C1	GNF2_HLA_C	Patient 1_Peak CAR T, Patient 1_Preinfusion, Patient 2_Day 24 CART, Patient 2_Preinfusion, Patient 3_Preinfusion, Patient 4_Peak CAR T	1.74411602375841, 3.10137045862661, 1.41049604601007, 3.26130251631793, 2.67922903619827, 2.22766442934646
C1	GNF2_ICAM3	Patient 1_Peak CAR T, Patient 1_Preinfusion, Patient 1_Product, Patient 2_Preinfusion, Patient 3_Preinfusion, Patient 4_Peak CAR T	2.49137998502065, 2.720873902089, 1.73517132498139, 2.74151983053255, 2.16212420900698, 1.92477962966664
C1	GNF2_ITGAL	Patient 1_Peak CAR T, Patient 1_Preinfusion, Patient 1_Product, Patient 2_Preinfusion, Patient 3_Preinfusion, Patient 4_Peak CAR T	2.54811042202137, 2.96712349808874, 1.66710352564286, 4.01836982104826, 2.78141958948075, 3.03919133831731
C1	GNF2_PTPN6	Patient 1_Peak CAR T, Patient 1_Preinfusion, Patient 2_Day 24 CART, Patient 2_Preinfusion, Patient 3_Preinfusion, Patient 4_Peak CAR T	2.2465899337126, 3.20665122412093, 1.41049604601007, 3.09104865325448, 2.48987185667501, 2.15433653929633
C1	GNF2_PTPRC	Patient 1_Peak CAR T, Patient 1_Preinfusion, Patient 2_Preinfusion, Patient 3_Preinfusion, Patient 4_Peak CAR T, Patient 4_Preinfusion	2.46713312839807, 3.06144951894608, 3.91570956075951, 2.68625236970675, 2.70098499582878, 1.91169703891699
C1	GOBP_ANTIGEN_PROCESSING_AND_PRESENTATION_OF_EXOGENOUS_PEPTIDE_ANTIGEN_VIA_MHC_CLASS_I_TAP_INDEPENDENT	Patient 1_Preinfusion, Patient 2_Day 24 CART, Patient 2_Preinfusion, Patient 3_Preinfusion, Patient 4_Peak CAR T, Patient 4_Preinfusion	2.5686749807847, 1.40441200862498, 2.43237404171093, 2.25609937819854, 1.88274413074542, 2.0900569383537
C1	GOBP_CYTOLYSIS	Patient 1_Peak CAR T, Patient 1_Preinfusion, Patient 2_Peak2, Patient 3_Preinfusion, Patient 4_Peak CAR T, Patient 4_Preinfusion	2.14582035214113, 2.15474552275174, 1.96686293208956, 2.09387264940878, 2.17666111553835, 2.2654813816208
C1	GOBP_EOSINOPHIL_CHEMOTAXIS	Patient 1_Preinfusion, Patient 1_Product, Patient 3_Peak, Patient 3_Product, Patient 4_Peak CAR T, Patient 4_Preinfusion	1.68930197742411, 1.94307721037965, 1.6751181087457, 1.83298913558341, 1.65411363962271, 1.67431020985967
C1	GOBP_EOSINOPHIL_MIGRATION	Patient 1_Preinfusion, Patient 1_Product, Patient 3_Peak, Patient 3_Product, Patient 4_Peak CAR T, Patient 4_Preinfusion	1.87485590198112, 1.94307721037965, 1.6751181087457, 1.83298913558341, 1.7881999992163, 1.67431020985967
C1	GOBP_INNATE_IMMUNE_RESPONSE	Patient 1_Preinfusion, Patient 1_Product, Patient 2_Day 24 CART, Patient 3_Preinfusion, Patient 4_Peak CAR T, Patient 4_Preinfusion	2.30092834327873, 2.08258911588069, 1.40441200862498, 1.83978845769327, 1.60066354512606, 2.07604148753407
C1	GOBP_POSITIVE_REGULATION_OF_NATURAL_KILLER_CELL_CHEMOTAXIS	Patient 1_Preinfusion, Patient 1_Product, Patient 3_Peak, Patient 3_Product, Patient 4_Peak CAR T, Patient 4_Preinfusion	1.68930197742411, 2.05215960337631, 1.6751181087457, 1.83298913558341, 1.65411363962271, 1.67431020985967
C1	GOBP_REGULATION_OF_IMMUNE_SYSTEM_PROCESS	Patient 1_Peak CAR T, Patient 1_Preinfusion, Patient 1_Product, Patient 3_Preinfusion, Patient 4_Peak CAR T, Patient 4_Preinfusion	2.35497760307198, 2.44966368116322, 2.70848923865924, 2.06625364478037, 2.1082023434155, 2.00594014007496
C1	GOBP_REGULATION_OF_NATURAL_KILLER_CELL_CHEMOTAXIS	Patient 1_Preinfusion, Patient 1_Product, Patient 3_Peak, Patient 3_Product, Patient 4_Peak CAR T, Patient 4_Preinfusion	1.68930197742411, 2.05215960337631, 1.6751181087457, 1.83298913558341, 1.65411363962271, 1.67431020985967
C1	GOBP_T_CELL_ACTIVATION	Patient 1_Peak CAR T, Patient 1_Preinfusion, Patient 1_Product, Patient 2_Preinfusion, Patient 3_Preinfusion, Patient 4_Peak CAR T	2.34149218037395, 2.46528010569036, 2.14957349910075, 1.70822841431687, 1.86727168623118, 2.16691270480105
C1	GOBP_T_CELL_MEDIATED_CYTOTOXICITY	Patient 1_Peak CAR T, Patient 1_Preinfusion, Patient 2_Day 24 CART, Patient 3_Preinfusion, Patient 4_Peak CAR T, Patient 4_Preinfusion	2.27333444344922, 2.73125988339683, 1.40441200862498, 2.18002809463099, 2.31274420385791, 2.18520048967265
C1	GOCC_ALPHA_BETA_T_CELL_RECEPTOR_COMPLEX	Patient 1_Day 7, Patient 3_Peak, Patient 3_Peak CAR T, Patient 3_Preinfusion, Patient 4_Peak CAR T, Patient 4_Peak CAR T	1.67743807635729, 1.63872455100867, 1.83387825118045, 1.83553369449928, 1.82147304203895, 1.81918366256906
C1	GOCC_ANCHORED_COMPONENT_OF_MEMBRANE	Patient 1_Preinfusion, Patient 1_Preinfusion, Patient 3_Peak, Patient 4_Peak, Patient 4_Peak CAR T, Patient 4_Peak CAR T	2.21766064478757, 2.19275281655755, 1.90860290216128, 1.7708119084633, 2.18332221737186, 2.18225072958526
C1	GOCC_CHLORIDE_CHANNEL_COMPLEX	Patient 1_Day 7, Patient 1_Preinfusion, Patient 2_Preinfusion, Patient 2_Preinfusion, Patient 3_Peak CAR T, Patient 4_Peak CAR T	1.65884754354174, 1.3168191252965, 1.339982862557, 1.32309136449321, 1.69884669575749, 1.33098581364966
C1	GOCC_CYTOSOLIC_LARGE_RIBOSOMAL_SUBUNIT	Patient 1_Day 7, Patient 1_Day 7, Patient 2_Preinfusion, Patient 2_Preinfusion, Patient 4_Peak, Patient 4_Peak	2.40537970811756, 2.38608263017389, 3.54973426583764, 3.49464456481557, 3.00275885143817, 2.97910022623991
C1	GOCC_CYTOSOLIC_SMALL_RIBOSOMAL_SUBUNIT	Patient 2_Preinfusion, Patient 2_Preinfusion, Patient 3_Preinfusion, Patient 3_Preinfusion, Patient 4_Peak, Patient 4_Peak	3.43582672833781, 3.35298663292388, 2.12309470198534, 2.12171834848123, 2.75123049139775, 2.71975745526033
C1	GOCC_ENDOCYTIC_VESICLE	Patient 1_Preinfusion, Patient 1_Preinfusion, Patient 2_Day 24 CART, Patient 2_Day 24 CART, Patient 3_Preinfusion, Patient 4_Peak CAR T	2.74367132846049, 2.71191747073208, 1.41652337300006, 1.40441200862498, 1.89579588807695, 1.70775086154804
C1	GOCC_EXTERNAL_ENCAPSULATING_STRUCTURE	Patient 1_Preinfusion, Patient 3_Peak, Patient 3_Peak, Patient 3_Peak CAR T, Patient 4_Peak CAR T, Patient 4_Peak CAR T	1.95595564171073, 2.27477943264713, 2.26687597505973, 1.9329915176531, 2.06311361395433, 2.04667442906283
C1	GOCC_GOLGI_APPARATUS	Patient 1_Preinfusion, Patient 1_Preinfusion, Patient 4_Peak CAR T, Patient 4_Peak CAR T, Patient 4_Preinfusion, Patient 4_Preinfusion	2.18429126645173, 2.158211505007, 1.73061511062669, 1.72873866820935, 2.2032039467136, 2.17236901751522
C1	GOCC_LARGE_RIBOSOMAL_SUBUNIT	Patient 1_Day 7, Patient 1_Day 7, Patient 2_Preinfusion, Patient 2_Preinfusion, Patient 4_Peak, Patient 4_Peak	2.40537970811756, 2.38608263017389, 2.34471100960665, 2.33685100339594, 2.66465182867455, 2.64541372001251
C1	GOCC_PHAGOCYTIC_VESICLE	Patient 1_Preinfusion, Patient 1_Preinfusion, Patient 2_Day 24 CART, Patient 2_Day 24 CART, Patient 2_Peak2, Patient 4_Peak CAR T	2.69652366461815, 2.69310898785603, 1.41652337300006, 1.40441200862498, 2.00256242431971, 1.85433280462845
C1	GOCC_TRANSPORT_VESICLE_MEMBRANE	Patient 1_Preinfusion, Patient 1_Preinfusion, Patient 3_Preinfusion, Patient 3_Preinfusion, Patient 4_Peak CAR T, Patient 4_Preinfusion	2.42077256203574, 2.41553590128974, 2.23355167034363, 2.23210371012536, 1.76886535032743, 2.13016954789561
C1	GOMF_CHEMOKINE_RECEPTOR_BINDING	Patient 1_Preinfusion, Patient 1_Preinfusion, Patient 1_Product, Patient 1_Product, Patient 3_Product, Patient 3_Product	1.8091801101009, 1.80659738637132, 2.0733632592031, 2.06944595831374, 1.83298913558341, 1.81797072558962
C1	GOMF_SERINE_HYDROLASE_ACTIVITY	Patient 1_Preinfusion, Patient 1_Preinfusion, Patient 3_Preinfusion, Patient 3_Preinfusion, Patient 4_Peak CAR T, Patient 4_Peak CAR T	2.19116791303774, 2.18812822114371, 2.07298109738646, 2.0460426775514, 1.95997039318086, 1.95871577290972
C1	GSE13547_2H_VS_12_H_ANTI_IGM_STIM_ZFX_KO_BCELL_UP	Patient 1_Peak CAR T, Patient 1_Preinfusion, Patient 2_Preinfusion, Patient 3_Preinfusion, Patient 4_Peak CAR T, Patient 4_Preinfusion	2.73884239092133, 2.74188299508659, 2.96640648763381, 2.33502350663598, 2.6812006113496, 2.39651414724444
C1	GSE14415_NATURAL_TREG_VS_FOXP3_KO_NATURAL_TREG_UP	Patient 1_Peak CAR T, Patient 1_Preinfusion, Patient 2_Preinfusion, Patient 3_Preinfusion, Patient 4_Peak CAR T, Patient 4_Preinfusion	2.47063861344034, 2.46263876048391, 2.53975773728417, 2.20524522391496, 2.28726029662972, 2.30166576513361
C1	GSE16450_IMMATURE_VS_MATURE_NEURON_CELL_LINE_12H_IFNA_STIM_UP	Patient 1_Peak CAR T, Patient 1_Preinfusion, Patient 1_Product, Patient 2_Preinfusion, Patient 3_Preinfusion, Patient 4_Peak CAR T	2.07851746122394, 2.89710044180336, 2.10292971279694, 2.91179652175735, 2.34565700484858, 2.3132230039792
C1	GSE19888_ADENOSINE_A3R_INH_VS_TCELL_MEMBRANES_ACT_MAST_CELL_UP	Patient 1_Peak CAR T, Patient 1_Preinfusion, Patient 3_Preinfusion, Patient 4_Day 21, Patient 4_Peak CAR T, Patient 4_Preinfusion	2.45772677848801, 3.09762735794034, 2.17373563597295, 2.18233423434477, 1.80259246120524, 2.19000224328811
C1	GSE20715_0H_VS_48H_OZONE_TLR4_KO_LUNG_UP	Patient 1_Peak CAR T, Patient 1_Preinfusion, Patient 2_Preinfusion, Patient 3_Peak CAR T, Patient 3_Preinfusion, Patient 4_Peak CAR T	2.14124183314567, 2.66482364398701, 2.21840261049786, 2.37767345395413, 2.25395282384877, 2.24664983050484
C1	GSE21063_WT_VS_NFATC1_KO_3H_ANTI_IGM_STIM_BCELL_DN	Patient 1_Peak CAR T, Patient 1_Preinfusion, Patient 2_Preinfusion, Patient 3_Preinfusion, Patient 4_Peak CAR T, Patient 4_Product	2.50508808167708, 2.67462874074608, 1.77690105072275, 2.34803164400666, 1.63573984307453, 1.86761981118109
C1	GSE22886_IGA_VS_IGM_MEMORY_BCELL_UP	Patient 1_Peak CAR T, Patient 1_Preinfusion, Patient 3_Preinfusion, Patient 4_Peak CAR T, Patient 4_Preinfusion, Patient 4_Product	2.23117331874215, 1.88750506282675, 2.33590278174323, 1.92151866417366, 2.03055743045651, 1.86761981118109
C1	GSE22886_NAIVE_BCELL_VS_NEUTROPHIL_DN	Patient 1_Peak CAR T, Patient 1_Preinfusion, Patient 3_Preinfusion, Patient 4_Day 21, Patient 4_Peak CAR T, Patient 4_Preinfusion	2.29010050993004, 2.1396267142026, 2.14768879634316, 2.3603918498811, 1.73992707017381, 2.15663558460532
C1	GSE22886_NAIVE_CD8_TCELL_VS_MEMORY_TCELL_UP	Patient 1_Peak CAR T, Patient 1_Preinfusion, Patient 2_Preinfusion, Patient 3_Preinfusion, Patient 4_Peak CAR T, Patient 4_Preinfusion	1.96603358800769, 2.7402187697972, 2.12126904907949, 2.60836534050839, 2.08217130162281, 2.51626756961473
C1	GSE22886_NAIVE_CD8_TCELL_VS_NKCELL_DN	Patient 1_Peak CAR T, Patient 1_Preinfusion, Patient 2_Day 24 CART, Patient 3_Preinfusion, Patient 4_Peak CAR T, Patient 4_Preinfusion	2.3135670094201, 2.41742685404588, 1.41099291587891, 2.18562425338351, 1.72474883146501, 2.19181635277956
C1	GSE22886_NAIVE_TCELL_VS_DC_UP	Patient 1_Peak CAR T, Patient 1_Preinfusion, Patient 2_Preinfusion, Patient 3_Preinfusion, Patient 4_Peak, Patient 4_Peak CAR T	2.04675194091941, 1.80618208289421, 4.15715252356676, 2.28431095402155, 2.19724225777357, 1.93043232693422
C1	GSE23568_ID3_TRANSDUCED_VS_ID3_KO_CD8_TCELL_UP	Patient 1_Peak CAR T, Patient 1_Preinfusion, Patient 3_Peak, Patient 3_Peak CAR T, Patient 3_Preinfusion, Patient 4_Peak CAR T	1.99018161311431, 1.95928956722065, 2.55903245215125, 2.71652567249591, 2.39277711473433, 1.99108322205241
C1	GSE24081_CONTROLLER_VS_PROGRESSOR_HIV_SPECIFIC_CD8_TCELL_DN	Patient 1_Peak CAR T, Patient 1_Preinfusion, Patient 3_Preinfusion, Patient 4_Day 21, Patient 4_Peak CAR T, Patient 4_Preinfusion	2.40001940547638, 2.08873759210897, 1.86599452637034, 2.24372773044587, 1.76768330428671, 2.12586829729141
C1	GSE24634_TREG_VS_TCONV_POST_DAY5_IL4_CONVERSION_DN	Patient 1_Preinfusion, Patient 2_Preinfusion, Patient 3_Preinfusion, Patient 4_Day 21, Patient 4_Peak CAR T, Patient 4_Preinfusion	2.73638789293546, 3.28710311276105, 2.66820310693251, 2.04846570155747, 2.32397483920582, 2.23803153859654
C1	GSE25123_CTRL_VS_IL4_STIM_MACROPHAGE_UP	Patient 1_Peak CAR T, Patient 1_Preinfusion, Patient 3_Peak, Patient 4_Day 21, Patient 4_Peak, Patient 4_Peak CAR T	1.88706934050631, 2.03592980903434, 2.39326415646253, 2.138887915672, 2.27574513808844, 2.12356402255107
C1	GSE26928_EFF_MEM_VS_CENTR_MEM_CD4_TCELL_UP	Patient 1_Preinfusion, Patient 3_Peak, Patient 3_Preinfusion, Patient 4_Peak, Patient 4_Peak CAR T, Patient 4_Preinfusion	2.70507139373051, 2.19483269396543, 1.97802054655396, 2.28124334933278, 2.47730296669599, 2.31643796935784
C1	GSE30962_PRIMARY_VS_SECONDARY_ACUTE_LCMV_INF_CD8_TCELL_DN	Patient 1_Peak CAR T, Patient 1_Preinfusion, Patient 2_Preinfusion, Patient 3_Preinfusion, Patient 4_Peak CAR T, Patient 4_Preinfusion	1.92293286345616, 1.84216492204834, 2.6613301287218, 2.1539452461319, 2.19296778679484, 2.161520055761
C1	GSE30962_PRIMARY_VS_SECONDARY_CHRONIC_LCMV_INF_CD8_TCELL_DN	Patient 1_Peak CAR T, Patient 1_Preinfusion, Patient 2_Preinfusion, Patient 3_Preinfusion, Patient 4_Peak CAR T, Patient 4_Preinfusion	2.23399799335436, 2.95481731657589, 2.37818628066109, 2.47760556787997, 2.2985165228228, 2.23281080398563
C1	GSE3920_IFNA_VS_IFNG_TREATED_FIBROBLAST_UP	Patient 1_Peak CAR T, Patient 1_Preinfusion, Patient 2_Preinfusion, Patient 3_Preinfusion, Patient 4_Peak CAR T, Patient 4_Preinfusion	2.42433598499598, 2.71272587788577, 3.41393913340979, 2.53445821641443, 2.53722528114229, 2.63165727890469
C1	GSE3982_BCELL_VS_NKCELL_DN	Patient 1_Peak CAR T, Patient 1_Preinfusion, Patient 2_Preinfusion, Patient 3_Preinfusion, Patient 4_Peak CAR T, Patient 4_Preinfusion	2.28951846956142, 2.32559792603989, 2.16370166456271, 2.18944455877974, 2.55116475484032, 2.12487729027478
C1	GSE3982_MAST_CELL_VS_EFF_MEMORY_CD4_TCELL_DN	Patient 1_Peak CAR T, Patient 1_Preinfusion, Patient 2_Preinfusion, Patient 3_Preinfusion, Patient 4_Peak CAR T, Patient 4_Preinfusion	2.38145992237552, 2.86631319881593, 3.37572555089771, 2.70606978019334, 1.99919097594647, 2.17181605276415
C1	GSE3982_MAST_CELL_VS_NKCELL_DN	Patient 1_Peak CAR T, Patient 1_Preinfusion, Patient 2_Preinfusion, Patient 3_Preinfusion, Patient 4_Peak CAR T, Patient 4_Preinfusion	2.46283932886853, 3.06358597110884, 2.31319037509628, 2.72817866075167, 2.20538717366222, 2.15121521831603
C1	GSE3982_NKCELL_VS_TH2_UP	Patient 1_Peak CAR T, Patient 1_Preinfusion, Patient 2_Preinfusion, Patient 3_Preinfusion, Patient 4_Peak, Patient 4_Peak CAR T	1.91023403969845, 2.69058865709245, 3.26823338275292, 2.62294932869405, 2.26644299532294, 2.10559858440448
C1	GSE40277_EOS_AND_LEF1_TRANSDUCED_VS_GATA1_AND_SATB1_TRANSDUCED_CD4_TCELL_UP	Patient 1_Peak CAR T, Patient 1_Preinfusion, Patient 2_Preinfusion, Patient 3_Preinfusion, Patient 4_Peak CAR T, Patient 4_Preinfusion	2.10421298038885, 1.98089912217999, 2.00828706865973, 2.09314497831867, 1.7992046432687, 1.98368012123548
C1	GSE5542_UNTREATED_VS_IFNG_TREATED_EPITHELIAL_CELLS_24H_UP	Patient 1_Peak CAR T, Patient 1_Preinfusion, Patient 2_Preinfusion, Patient 3_Preinfusion, Patient 4_Peak CAR T, Patient 4_Preinfusion	2.12598840900506, 2.54506626922837, 1.81419958355389, 2.50555818654492, 1.98836645274131, 2.27821797686637
C1	GSE7218_UNSTIM_VS_ANTIGEN_STIM_THROUGH_IGG_BCELL_DN	Patient 1_Peak CAR T, Patient 1_Preinfusion, Patient 1_Product, Patient 3_Preinfusion, Patient 4_Peak CAR T, Patient 4_Product	2.70596159204973, 2.97632041171751, 2.4318482258881, 2.13566544169525, 2.22377740410242, 2.23660946784895
C1	GSE7460_FOXP3_MUT_VS_WT_ACT_WITH_TGFB_TCONV_UP	Patient 1_Peak CAR T, Patient 1_Preinfusion, Patient 1_Product, Patient 4_Day 21, Patient 4_Peak CAR T, Patient 4_Preinfusion	2.17084281838239, 1.6933529037993, 2.10885499344392, 2.37327920851263, 2.02613916052558, 2.38884424159172
C1	HALLMARK_COMPLEMENT	Patient 1_Peak CAR T, Patient 1_Preinfusion, Patient 1_Product, Patient 2_Product, Patient 3_Preinfusion, Patient 4_Peak CAR T	1.83179544448182, 2.15445992839368, 2.3269153885065, 1.66492942851122, 1.97650166284047, 1.95185056278695
C1	KEGG_TYPE_I_DIABETES_MELLITUS	Patient 1_Preinfusion, Patient 2_Peak, Patient 3_Peak, Patient 3_Preinfusion, Patient 4_Peak CAR T, Patient 4_Preinfusion	2.31231046807534, 1.64692356931061, 2.33678260586191, 2.30141139038741, 1.95442472627404, 2.29093190388988
C1	LI_PBMC_MENACTRA_AGE_18_45YO_CORRELATED_WITH_ANTI_POLYSACCHARIDE_ANTIBODY_3DY_POSITIVE	Patient 1_Preinfusion, Patient 3_Peak, Patient 3_Peak CAR T, Patient 3_Preinfusion, Patient 4_Peak CAR T, Patient 4_Preinfusion	2.69329462806042, 2.30088055537671, 1.83759378591178, 2.13763156968969, 1.76466119197923, 2.0568510664759
C1	MENON_FETAL_KIDNEY_10_IMMUNE_CELLS	Patient 1_Preinfusion, Patient 3_Peak, Patient 3_Peak CAR T, Patient 3_Preinfusion, Patient 4_Peak, Patient 4_Peak CAR T	1.81579672940468, 1.85840248346041, 2.21086990233513, 1.61283887853775, 1.72989646122052, 1.95073361505539
C1	MODULE_208	Patient 1_Peak CAR T, Patient 1_Preinfusion, Patient 1_Product, Patient 3_Peak CAR T, Patient 3_Preinfusion, Patient 4_Peak CAR T	1.80670057462894, 2.57055153237626, 1.97533347595908, 1.96080576261174, 1.7929428127637, 1.7967014054425
C1	MODULE_292	Patient 1_Peak CAR T, Patient 1_Preinfusion, Patient 1_Product, Patient 2_Preinfusion, Patient 3_Peak CAR T, Patient 3_Preinfusion	2.40381974374543, 2.78488524796038, 2.1043062540678, 1.71714442055992, 2.15806542805141, 2.11056136938212
C1	MODULE_41	Patient 1_Peak CAR T, Patient 1_Preinfusion, Patient 2_Preinfusion, Patient 3_Preinfusion, Patient 4_Day 21, Patient 4_Peak CAR T	2.23367955978979, 2.32566205339968, 1.71457483293775, 1.87759566862398, 2.13812965773535, 1.66991087367877
C1	OSMAN_BLOOD_CHAD63_KH_AGE_18_50YO_HIGH_DOSE_SUBJECTS_24HR_DN	Patient 1_Peak CAR T, Patient 1_Preinfusion, Patient 1_Product, Patient 3_Preinfusion, Patient 4_Peak CAR T, Patient 4_Preinfusion	1.94948530339579, 1.55272258068046, 1.92001394375902, 2.16896169238519, 2.1867075127758, 1.79436225297428
C1	PID_CD8_TCR_PATHWAY	Patient 1_Peak CAR T, Patient 1_Preinfusion, Patient 1_Product, Patient 3_Preinfusion, Patient 4_Day 21, Patient 4_Peak CAR T	2.51932977916936, 2.46962190668538, 2.07198346995958, 2.63821250375017, 2.16936355056657, 2.25868421090153
C1	REACTOME_ENDOSOMAL_VACUOLAR_PATHWAY	Patient 1_Preinfusion, Patient 2_Day 24 CART, Patient 2_Preinfusion, Patient 3_Preinfusion, Patient 4_Peak CAR T, Patient 4_Preinfusion	2.69545539332562, 1.39753275749306, 2.40628241824601, 2.25372590039921, 2.04273396119258, 2.08147195556208
C1	REACTOME_PEPTIDE_LIGAND_BINDING_RECEPTORS	Patient 1_Preinfusion, Patient 3_Peak, Patient 4_Day 21, Patient 4_Peak, Patient 4_Peak CAR T, Patient 4_Preinfusion	2.31241538156862, 2.07276998291631, 2.00452564208391, 1.83883155106761, 1.84669752069944, 2.08502164126027
C1	RUBENSTEIN_SKELETAL_MUSCLE_FAP_CELLS	Patient 1_Preinfusion, Patient 3_Peak, Patient 3_Peak CAR T, Patient 4_Day 21, Patient 4_Peak CAR T, Patient 4_Preinfusion	1.6606235349976, 2.06763873765792, 2.6491269920478, 1.83824500720438, 2.07924712464142, 1.94848761890626
C1	SCHERER_PBMC_APSV_WETVAX_AGE_18_32YO_5_TO_7DY_UP	Patient 1_Peak CAR T, Patient 1_Preinfusion, Patient 3_Peak, Patient 3_Peak CAR T, Patient 3_Preinfusion, Patient 4_Preinfusion	1.89564997504265, 2.96423968405832, 1.98231929203143, 2.15189448765583, 1.90747305949126, 1.95688634623562
C1	TRAVAGLINI_LUNG_PERICYTE_CELL	Patient 1_Peak CAR T, Patient 1_Preinfusion, Patient 2_Day 24 CART, Patient 4_Day 21, Patient 4_Peak CAR T, Patient 4_Preinfusion	1.88091069305062, 2.15998316666812, 1.40866206406642, 1.8337911903359, 1.96389742874052, 1.79113531177589
C1	ZHENG_CORD_BLOOD_C1_PUTATIVE_MEGAKARYOCYTE_PROGENITOR	Patient 1_Peak CAR T, Patient 1_Preinfusion, Patient 3_Peak CAR T, Patient 3_Preinfusion, Patient 4_Peak, Patient 4_Preinfusion	1.8691327875589, 2.24182637255194, 1.72817673271858, 2.03137884459871, 1.76184050376631, 1.75575704114355
C1	ZHONG_PFC_MAJOR_TYPES_OPC	Patient 1_Peak CAR T, Patient 2_Day 24 CART, Patient 2_Peak2, Patient 3_Peak, Patient 3_Peak CAR T, Patient 3_Preinfusion	1.57225703640097, 1.40866206406642, 1.8347881795661, 1.65889569054117, 1.58360043871636, 1.80403914683256
C1	AIZARANI_LIVER_C32_MVECS_3	Patient 1_Preinfusion, Patient 2_Day 24 CART, Patient 2_Preinfusion, Patient 4_Day 21, Patient 4_Peak CAR T	2.21652395435718, 1.40866206406642, 2.22414084725345, 2.00962029767066, 1.82434060020981
C1	BIOCARTA_IL17_PATHWAY	Patient 1_Preinfusion, Patient 1_Product, Patient 3_Preinfusion, Patient 4_Peak CAR T, Patient 4_Preinfusion	1.93338699647786, 1.88377317084455, 2.1248694101319, 2.1598157319105, 2.1070146901464
C1	CD4_Th17	Patient 1_Peak CAR T, Patient 1_Preinfusion, Patient 1_Product, Patient 2_Preinfusion, Patient 2_Product	1.818487982616, 1.90175557167704, 2.12012337517953, 1.32132042960005, 1.54685651260899
C1	DESCARTES_FETAL_CEREBELLUM_MICROGLIA	Patient 1_Peak CAR T, Patient 1_Preinfusion, Patient 1_Product, Patient 2_Preinfusion, Patient 4_Peak CAR T	2.70056640092605, 3.14423954003744, 1.78145329101806, 3.03794067538425, 2.02964083729636
C1	DESCARTES_FETAL_LIVER_MESOTHELIAL_CELLS	Patient 1_Peak CAR T, Patient 1_Preinfusion, Patient 3_Peak, Patient 3_Peak CAR T, Patient 4_Peak CAR T	1.3301551607116, 1.69919028414152, 1.80823438315595, 1.69865516282088, 1.65350891372307
C1	DESCARTES_FETAL_PLACENTA_EXTRAVILLOUS_TROPHOBLASTS	Patient 1_Day 7, Patient 1_Peak CAR T, Patient 3_Peak CAR T, Patient 3_Preinfusion, Patient 4_Peak	1.65358102211204, 1.70086640533405, 1.70824305649626, 1.60603047764164, 1.65286229410248
C1	DESCARTES_FETAL_SPLEEN_MESOTHELIAL_CELLS	Patient 1_Peak CAR T, Patient 1_Preinfusion, Patient 3_Peak, Patient 3_Peak CAR T, Patient 4_Peak CAR T	1.69024043554362, 2.00986772333668, 2.05637230659557, 1.96554350778446, 2.3447809421337
C1	GAO_LARGE_INTESTINE_ADULT_CG_GOBLET_CELL_SUBTYPE_2	Patient 1_Peak CAR T, Patient 1_Preinfusion, Patient 3_Preinfusion, Patient 4_Peak CAR T, Patient 4_Preinfusion	1.32618454829157, 1.33341044879397, 1.33095147396309, 1.32979004390693, 1.32281843511227
C1	GAO_LARGE_INTESTINE_ADULT_CJ_IMMUNE_CELLS	Patient 1_Peak CAR T, Patient 1_Preinfusion, Patient 3_Peak, Patient 4_Day 21, Patient 4_Peak CAR T	2.36490264348381, 2.37486346824695, 1.91852685760247, 1.88124265276944, 1.7979178635984
C1	GARCIA_PINERES_PBMC_HPV_16_L1_VLP_AGE_18_25YO_2MO_DN	Patient 1_Preinfusion, Patient 2_Preinfusion, Patient 3_Peak, Patient 3_Peak CAR T, Patient 4_Peak CAR T	2.43215846793781, 2.97782747804092, 2.02565341321736, 2.1260477966489, 1.89748378722263
C1	GNF2_CASP8	Patient 1_Peak CAR T, Patient 1_Preinfusion, Patient 2_Preinfusion, Patient 3_Preinfusion, Patient 4_Peak CAR T	1.82263510027436, 1.75925407687423, 2.19459592945367, 2.10327434691138, 2.01663441742313
C1	GNF2_FGR	Patient 1_Product, Patient 2_Preinfusion, Patient 3_Peak CAR T, Patient 4_Peak CAR T, Patient 4_Product	1.81469050307055, 1.79168582828897, 2.15650667720505, 1.90843409273031, 1.61730712342466
C1	GNF2_PECAM1	Patient 1_Preinfusion, Patient 1_Product, Patient 2_Preinfusion, Patient 4_Peak CAR T, Patient 4_Product	1.85770119582458, 1.81469050307055, 2.12026522330801, 2.06968342873448, 1.61730712342466
C1	GNF2_SELL	Patient 1_Peak CAR T, Patient 1_Preinfusion, Patient 2_Day 24 CART, Patient 2_Preinfusion, Patient 4_Peak CAR T	2.37293846252643, 3.00389993671287, 1.41049604601007, 2.48221427939093, 1.70175866599695
C1	GNF2_SNRK	Patient 1_Peak CAR T, Patient 1_Preinfusion, Patient 2_Preinfusion, Patient 3_Preinfusion, Patient 4_Peak CAR T	2.16212848013989, 2.75453483420089, 3.24337368683129, 2.31980679427274, 2.37800304557623
C1	GNF2_STAT6	Patient 1_Peak CAR T, Patient 1_Preinfusion, Patient 2_Day 24 CART, Patient 2_Preinfusion, Patient 4_Peak CAR T	2.24262462272672, 3.1175411469716, 1.41049604601007, 2.00011818316436, 1.73028856525218
C1	GOBP_DEFENSE_RESPONSE	Patient 1_Preinfusion, Patient 1_Product, Patient 3_Preinfusion, Patient 4_Peak CAR T, Patient 4_Preinfusion	2.74330026891377, 2.53189630807687, 1.77983348485402, 2.02998974781407, 2.13064572513977
C1	GOBP_DEFENSE_RESPONSE_TO_OTHER_ORGANISM	Patient 1_Preinfusion, Patient 1_Product, Patient 2_Day 24 CART, Patient 4_Peak CAR T, Patient 4_Preinfusion	2.49791634216112, 2.43732308343955, 1.40441200862498, 1.75149225008788, 2.04840911010191
C1	GOBP_NATURAL_KILLER_CELL_CHEMOTAXIS	Patient 1_Preinfusion, Patient 1_Product, Patient 3_Peak, Patient 3_Product, Patient 4_Peak CAR T	1.76334695213895, 2.05215960337631, 1.6751181087457, 1.83298913558341, 1.65411363962271
C1	GOBP_POSITIVE_REGULATION_OF_CELL_KILLING	Patient 1_Preinfusion, Patient 2_Day 24 CART, Patient 3_Preinfusion, Patient 4_Peak CAR T, Patient 4_Preinfusion	2.89904711576412, 1.40441200862498, 2.30663231084555, 2.04045315232579, 2.39583499979157
C1	GOBP_REGULATION_OF_IMMUNE_RESPONSE	Patient 1_Peak CAR T, Patient 1_Preinfusion, Patient 3_Preinfusion, Patient 4_Peak CAR T, Patient 4_Preinfusion	2.34863475153308, 2.2449211394414, 2.03807401509305, 1.77625645002277, 1.97994902453762
C1	GOBP_RESPONSE_TO_BIOTIC_STIMULUS	Patient 1_Preinfusion, Patient 1_Product, Patient 2_Day 24 CART, Patient 4_Peak CAR T, Patient 4_Preinfusion	2.23246493439005, 2.25585034229225, 1.40441200862498, 1.68730734367682, 2.03245309234122
C1	GOCC_COATED_VESICLE_MEMBRANE	Patient 1_Preinfusion, Patient 1_Preinfusion, Patient 3_Peak, Patient 3_Preinfusion, Patient 4_Preinfusion	2.75029706728464, 2.73398203050964, 2.01176527726581, 2.01401676993282, 2.13071402015463
C1	GOCC_CYTOLYTIC_GRANULE	Patient 1_Preinfusion, Patient 1_Preinfusion, Patient 1_Product, Patient 1_Product, Patient 2_Peak2	1.89464772109644, 1.89276475637612, 1.67331075097497, 1.67034748168231, 1.67194709422902
C1	GSE10325_LUPUS_CD4_TCELL_VS_LUPUS_BCELL_UP	Patient 1_Peak CAR T, Patient 1_Preinfusion, Patient 1_Product, Patient 2_Preinfusion, Patient 4_Peak CAR T	2.20618846725128, 2.0372646950249, 2.20100799888244, 1.74095556882355, 1.85325052433057
C1	GSE13547_CTRL_VS_ANTI_IGM_STIM_BCELL_2H_DN	Patient 1_Peak CAR T, Patient 1_Preinfusion, Patient 2_Preinfusion, Patient 3_Preinfusion, Patient 4_Peak CAR T	2.20266881262597, 1.83104534512281, 2.40884518202662, 2.11044940410486, 2.12264199296698
C1	GSE14415_INDUCED_TREG_VS_FOXP3_KO_INDUCED_TREG_IL2_CULTURE_DN	Patient 1_Peak CAR T, Patient 1_Preinfusion, Patient 2_Preinfusion, Patient 4_Peak CAR T, Patient 4_Preinfusion	1.88499961748063, 2.72126329499836, 2.7270785733246, 2.05687802716497, 2.50746116556198
C1	GSE14415_INDUCED_TREG_VS_FOXP3_KO_INDUCED_TREG_IL2_CULTURE_UP	Patient 1_Peak CAR T, Patient 1_Preinfusion, Patient 1_Product, Patient 4_Peak CAR T, Patient 4_Preinfusion	2.07922605056798, 2.49998499345651, 2.2358669652738, 2.244556548331, 2.08900592818019
C1	GSE14699_NAIVE_VS_ACT_CD8_TCELL_UP	Patient 1_Preinfusion, Patient 3_Peak, Patient 3_Peak CAR T, Patient 3_Preinfusion, Patient 4_Peak CAR T	1.97931919166467, 2.61650635503143, 2.60147319703117, 2.3268838720315, 1.71506889674323
C1	GSE14769_UNSTIM_VS_80MIN_LPS_BMDM_DN	Patient 1_Peak CAR T, Patient 1_Preinfusion, Patient 1_Product, Patient 2_Preinfusion, Patient 4_Peak CAR T	2.11386809848343, 2.80611988862508, 2.22136966203339, 2.35850750840933, 2.40170359405409
C1	GSE15733_BM_VS_SPLEEN_MEMORY_CD4_TCELL_UP	Patient 1_Peak CAR T, Patient 1_Preinfusion, Patient 3_Preinfusion, Patient 4_Peak CAR T, Patient 4_Preinfusion	2.16809525279613, 2.42028721451912, 2.48412282584999, 1.93495598925301, 2.1993791947455
C1	GSE16385_IFNG_TNF_VS_UNSTIM_MACROPHAGE_ROSIGLITAZONE_TREATED_DN	Patient 1_Peak CAR T, Patient 1_Preinfusion, Patient 2_Preinfusion, Patient 3_Preinfusion, Patient 4_Peak CAR T	1.92134454165871, 2.60166626575615, 3.01923325463864, 1.83606823236644, 1.87503328040716
C1	GSE16450_CTRL_VS_IFNA_6H_STIM_IMMATURE_NEURON_CELL_LINE_DN	Patient 1_Peak CAR T, Patient 1_Preinfusion, Patient 2_Preinfusion, Patient 3_Preinfusion, Patient 4_Peak CAR T	1.97622178717684, 3.14387373248145, 3.43187538235151, 2.38509075448976, 2.89797321148421
C1	GSE17301_ACD3_ACD28_VS_ACD3_ACD28_AND_IFNA5_STIM_CD8_TCELL_DN	Patient 1_Peak CAR T, Patient 1_Preinfusion, Patient 2_Preinfusion, Patient 3_Preinfusion, Patient 4_Peak CAR T	2.21856565980456, 3.30792962840315, 2.12833152469483, 2.14516561963648, 2.4292991657502
C1	GSE17301_CTRL_VS_48H_IFNA2_STIM_CD8_TCELL_UP	Patient 1_Peak CAR T, Patient 1_Preinfusion, Patient 1_Product, Patient 2_Preinfusion, Patient 4_Peak CAR T	2.34640191435227, 2.5816569599086, 1.8982286578504, 1.89365837340698, 1.58725129137152
C1	GSE18804_SPLEEN_MACROPHAGE_VS_COLON_TUMORAL_MACROPHAGE_UP	Patient 1_Peak CAR T, Patient 1_Preinfusion, Patient 1_Product, Patient 3_Preinfusion, Patient 4_Peak CAR T	1.91461743094896, 2.37741117242886, 2.01283437851351, 2.55077690027544, 1.72419811404571
C1	GSE19888_ADENOSINE_A3R_INH_VS_ACT_WITH_INHIBITOR_PRETREATMENT_IN_MAST_CELL_UP	Patient 1_Peak CAR T, Patient 1_Preinfusion, Patient 2_Preinfusion, Patient 4_Peak CAR T, Patient 4_Product	2.48889028780541, 3.22952308363858, 2.19640046011833, 2.11852146349619, 1.66532481260284
C1	GSE21063_CTRL_VS_ANTI_IGM_STIM_BCELL_16H_DN	Patient 1_Peak CAR T, Patient 1_Preinfusion, Patient 2_Preinfusion, Patient 3_Preinfusion, Patient 4_Peak CAR T	2.44394149115817, 2.55371451351333, 2.6697896723765, 2.55943140025246, 2.01748407433501
C1	GSE21063_WT_VS_NFATC1_KO_3H_ANTI_IGM_STIM_BCELL_UP	Patient 1_Peak CAR T, Patient 1_Preinfusion, Patient 2_Preinfusion, Patient 3_Preinfusion, Patient 4_Peak CAR T	2.64243291872406, 2.27811495815744, 3.0533539963068, 2.08793120771202, 2.10795046286351
C1	GSE21360_PRIMARY_VS_QUATERNARY_MEMORY_CD8_TCELL_DN	Patient 1_Peak CAR T, Patient 1_Preinfusion, Patient 2_Preinfusion, Patient 3_Preinfusion, Patient 4_Peak CAR T	2.22855906139722, 2.26842443277796, 2.84873134873584, 2.2638218196221, 1.92400436387302
C1	GSE21670_UNTREATED_VS_IL6_TREATED_CD4_TCELL_DN	Patient 1_Peak CAR T, Patient 1_Preinfusion, Patient 2_Preinfusion, Patient 3_Preinfusion, Patient 4_Peak CAR T	1.91273275448438, 2.18818798626556, 2.79042797072216, 2.07360144600919, 1.97224725063677
C1	GSE21927_SPLEEN_C57BL6_VS_EL4_TUMOR_BALBC_MONOCYTES_UP	Patient 1_Peak CAR T, Patient 1_Preinfusion, Patient 2_Preinfusion, Patient 3_Preinfusion, Patient 4_Peak CAR T	2.13051921063248, 2.092862974608, 3.1480060201838, 2.048775797864, 1.97434235688137
C1	GSE21927_SPLENIC_VS_TUMOR_MONOCYTES_FROM_C26GM_TUMOROUS_MICE_BALBC_DN	Patient 1_Peak CAR T, Patient 1_Preinfusion, Patient 2_Preinfusion, Patient 3_Preinfusion, Patient 4_Peak CAR T	2.02286231816198, 2.20892849498452, 3.17569847023005, 2.70285574659888, 2.59199816260407
C1	GSE22886_CD4_TCELL_VS_BCELL_NAIVE_UP	Patient 1_Peak CAR T, Patient 1_Preinfusion, Patient 1_Product, Patient 3_Preinfusion, Patient 4_Peak CAR T	2.10235360779599, 1.9123530935053, 2.01706641713072, 2.19880658728019, 1.88680254634689
C1	GSE22886_NAIVE_CD8_TCELL_VS_DC_UP	Patient 1_Peak CAR T, Patient 1_Preinfusion, Patient 1_Product, Patient 2_Preinfusion, Patient 4_Peak CAR T	1.86057618380349, 2.42239699669012, 2.25664994466071, 3.04951253842379, 2.28280069831966
C1	GSE22886_UNSTIM_VS_STIM_MEMORY_TCELL_UP	Patient 1_Peak CAR T, Patient 1_Preinfusion, Patient 2_Preinfusion, Patient 3_Preinfusion, Patient 4_Peak CAR T	2.71085500219408, 2.76780890865537, 3.3047696075886, 2.1892536008309, 2.47798989829699
C1	GSE22935_WT_VS_MYD88_KO_MACROPHAGE_UP	Patient 1_Peak CAR T, Patient 1_Preinfusion, Patient 2_Preinfusion, Patient 3_Peak, Patient 4_Peak CAR T	2.14656919504309, 2.16619428965086, 1.66619308986318, 2.19646351911183, 1.70786277852517
C1	GSE23321_EFFECTOR_MEMORY_VS_NAIVE_CD8_TCELL_UP	Patient 1_Peak CAR T, Patient 1_Preinfusion, Patient 1_Product, Patient 2_Preinfusion, Patient 3_Preinfusion	2.23903312441884, 2.52049063170276, 1.94169954314469, 1.83859783544792, 2.00987148008582
C1	GSE23398_WT_VS_IL2_KO_CD4_TCELL_SCURFY_MOUSE_UP	Patient 1_Preinfusion, Patient 2_Day 24 CART, Patient 3_Peak, Patient 3_Preinfusion, Patient 4_Preinfusion	1.63369763990716, 1.41099291587891, 2.2279176703422, 2.16132138973643, 2.09920680303261
C1	GSE23568_CTRL_TRANSDUCED_VS_WT_CD8_TCELL_DN	Patient 1_Peak CAR T, Patient 1_Preinfusion, Patient 2_Preinfusion, Patient 3_Preinfusion, Patient 4_Peak CAR T	1.92875729088522, 2.336698711334, 1.86730328834891, 2.23827484232173, 2.28927910961746
C1	GSE23568_ID3_TRANSDUCED_VS_ID3_KO_CD8_TCELL_DN	Patient 1_Peak CAR T, Patient 1_Preinfusion, Patient 2_Day 24 CART, Patient 2_Preinfusion, Patient 4_Peak CAR T	2.14851937898904, 1.99348419990403, 1.41099291587891, 2.34302093537369, 1.81603100150757
C1	GSE2405_0H_VS_12H_A_PHAGOCYTOPHILUM_STIM_NEUTROPHIL_UP	Patient 1_Peak CAR T, Patient 1_Preinfusion, Patient 2_Preinfusion, Patient 4_Peak CAR T, Patient 4_Product	2.29179537736849, 2.92902840024734, 2.35247135933479, 2.10014508269894, 2.07928274848768
C1	GSE24142_ADULT_VS_FETAL_DN2_THYMOCYTE_UP	Patient 1_Peak CAR T, Patient 1_Preinfusion, Patient 2_Day 24 CART, Patient 2_Preinfusion, Patient 4_Peak CAR T	1.92327495507843, 2.48476171059867, 1.41099291587891, 2.88123587370016, 2.11888581889947
C1	GSE24142_EARLY_THYMIC_PROGENITOR_VS_DN2_THYMOCYTE_ADULT_UP	Patient 1_Peak CAR T, Patient 1_Preinfusion, Patient 2_Preinfusion, Patient 3_Preinfusion, Patient 4_Peak CAR T	2.42243086354765, 2.41949214764563, 2.01408728098323, 2.41660097187678, 1.87399336439182
C1	GSE24726_WT_VS_E2_2_KO_PDC_DAY6_POST_DELETION_DN	Patient 1_Peak CAR T, Patient 1_Preinfusion, Patient 2_Preinfusion, Patient 3_Preinfusion, Patient 4_Peak CAR T	2.104843841265, 2.17000100366387, 2.16593395288988, 2.43273472721999, 1.74561608816763
C1	GSE27786_LSK_VS_NEUTROPHIL_DN	Patient 1_Peak CAR T, Patient 1_Preinfusion, Patient 2_Preinfusion, Patient 3_Preinfusion, Patient 4_Peak CAR T	2.38092026629392, 2.67791182717882, 2.10658389841596, 2.34048475507781, 1.98772814806232
C1	GSE27859_MACROPHAGE_VS_CD11C_INT_F480_INT_DC_UP	Patient 1_Peak CAR T, Patient 1_Preinfusion, Patient 2_Preinfusion, Patient 3_Preinfusion, Patient 4_Peak CAR T	2.04664555477274, 2.06674112957975, 2.19213483126241, 2.52758815249261, 1.93441968027892
C1	GSE30083_SP2_VS_SP4_THYMOCYTE_DN	Patient 1_Peak CAR T, Patient 1_Preinfusion, Patient 2_Preinfusion, Patient 3_Preinfusion, Patient 4_Peak CAR T	1.98342427397675, 2.92320550815293, 1.87317104511647, 2.09062453032401, 2.01196084341971
C1	GSE30962_ACUTE_VS_CHRONIC_LCMV_PRIMARY_INF_CD8_TCELL_UP	Patient 1_Peak CAR T, Patient 1_Preinfusion, Patient 2_Preinfusion, Patient 3_Preinfusion, Patient 4_Peak CAR T	3.33601373350715, 2.73781590778645, 3.29847852674493, 2.18814391489927, 3.01001791649417
C1	GSE30962_ACUTE_VS_CHRONIC_LCMV_SECONDARY_INF_CD8_TCELL_UP	Patient 1_Peak CAR T, Patient 1_Preinfusion, Patient 2_Preinfusion, Patient 3_Preinfusion, Patient 4_Peak CAR T	2.90809207415124, 2.18126233609918, 2.71912927926444, 2.29954267393673, 2.791781625091
C1	GSE32423_MEMORY_VS_NAIVE_CD8_TCELL_UP	Patient 1_Peak CAR T, Patient 1_Preinfusion, Patient 2_Preinfusion, Patient 3_Preinfusion, Patient 4_Peak CAR T	2.12446241658705, 2.29221789267046, 1.91973744795943, 2.20505163331743, 2.06417031696496
C1	GSE32986_UNSTIM_VS_CURDLAN_HIGHDOSE_STIM_DC_DN	Patient 1_Peak CAR T, Patient 1_Preinfusion, Patient 2_Preinfusion, Patient 3_Preinfusion, Patient 4_Peak CAR T	3.37889934652402, 2.44898802069638, 3.69443267029274, 2.95291175062373, 1.59761348100476
C1	GSE32986_UNSTIM_VS_GMCSF_AND_CURDLAN_LOWDOSE_STIM_DC_DN	Patient 1_Peak CAR T, Patient 1_Preinfusion, Patient 2_Preinfusion, Patient 3_Preinfusion, Patient 4_Peak CAR T	3.02787451510344, 2.73970639902201, 3.87700076164507, 2.90447630990596, 1.80639340180905
C1	GSE3565_DUSP1_VS_WT_SPLENOCYTES_POST_LPS_INJECTION_DN	Patient 1_Peak CAR T, Patient 1_Preinfusion, Patient 4_Day 21, Patient 4_Peak CAR T, Patient 4_Preinfusion	1.91433325437592, 2.53765705069866, 2.27493928996438, 2.31385136519556, 2.15257421501433
C1	GSE37533_PPARG1_FOXP3_VS_FOXP3_TRANSDUCED_CD4_TCELL_PIOGLITAZONE_TREATED_UP	Patient 1_Peak CAR T, Patient 1_Preinfusion, Patient 2_Day 24 CART, Patient 2_Preinfusion, Patient 4_Peak CAR T	2.24913546357682, 3.19973202035325, 1.41099291587891, 2.07822175206576, 1.62488164606373
C1	GSE39110_DAY3_VS_DAY6_POST_IMMUNIZATION_CD8_TCELL_UP	Patient 1_Peak CAR T, Patient 1_Preinfusion, Patient 2_Preinfusion, Patient 3_Preinfusion, Patient 4_Peak CAR T	2.33064917388734, 1.88518791271608, 2.75651849992465, 2.09334241923588, 2.34355403814855
C1	GSE3920_IFNA_VS_IFNB_TREATED_ENDOTHELIAL_CELL_DN	Patient 1_Preinfusion, Patient 1_Product, Patient 2_Preinfusion, Patient 3_Preinfusion, Patient 4_Peak CAR T	2.59788510848685, 2.13302438953473, 1.81487024993182, 2.19547227493773, 1.62068765894378
C1	GSE3982_BASOPHIL_VS_NKCELL_DN	Patient 1_Peak CAR T, Patient 1_Preinfusion, Patient 3_Preinfusion, Patient 4_Peak CAR T, Patient 4_Preinfusion	2.23756450902542, 1.90571543143655, 2.14545945481249, 2.02276828340956, 2.16166467225583
C1	GSE3982_BASOPHIL_VS_TH1_UP	Patient 1_Peak CAR T, Patient 1_Preinfusion, Patient 2_Preinfusion, Patient 3_Preinfusion, Patient 4_Peak CAR T	2.65701600319124, 2.63581839310161, 2.58571991243262, 2.24729505941118, 1.76499924782823
C1	GSE3982_CTRL_VS_LPS_48H_DC_DN	Patient 1_Peak CAR T, Patient 1_Preinfusion, Patient 1_Product, Patient 3_Preinfusion, Patient 4_Peak CAR T	2.01003879973955, 2.61805702806476, 1.94235889952044, 2.00318002503624, 1.72018302314526
C1	GSE40274_CTRL_VS_XBP1_TRANSDUCED_ACTIVATED_CD4_TCELL_UP	Patient 1_Peak CAR T, Patient 1_Preinfusion, Patient 2_Preinfusion, Patient 3_Preinfusion, Patient 4_Peak CAR T	2.34042120924221, 2.78999878738332, 2.55075051666135, 1.94447278167, 2.01580802977952
C1	GSE40666_WT_VS_STAT1_KO_CD8_TCELL_WITH_IFNA_STIM_90MIN_UP	Patient 1_Peak CAR T, Patient 1_Preinfusion, Patient 2_Preinfusion, Patient 3_Preinfusion, Patient 4_Peak CAR T	1.94289440261885, 1.95274684222859, 2.10958316245279, 2.33976209916296, 2.05840312790285
C1	GSE4142_NAIVE_BCELL_VS_PLASMA_CELL_UP	Patient 1_Peak CAR T, Patient 1_Preinfusion, Patient 1_Product, Patient 2_Preinfusion, Patient 4_Peak CAR T	1.87744032227874, 2.136984311489, 1.82372417081942, 2.42968867263126, 2.18810890304162
C1	GSE42021_CD24HI_VS_CD24INT_TREG_THYMUS_DN	Patient 1_Peak CAR T, Patient 1_Preinfusion, Patient 2_Day 24 CART, Patient 2_Preinfusion, Patient 4_Peak CAR T	1.94590239297184, 3.48883774285817, 1.41099291587891, 1.7677221353782, 1.6271130485341
C1	GSE42021_TREG_PLN_VS_CD24INT_TREG_THYMUS_DN	Patient 1_Peak CAR T, Patient 1_Preinfusion, Patient 2_Day 24 CART, Patient 2_Preinfusion, Patient 4_Peak CAR T	2.58504922663207, 3.35295589703072, 1.41099291587891, 1.90136919071697, 1.61905093829233
C1	GSE42021_TREG_PLN_VS_TREG_PRECURSORS_THYMUS_DN	Patient 1_Peak CAR T, Patient 1_Preinfusion, Patient 2_Day 24 CART, Patient 2_Preinfusion, Patient 4_Peak CAR T	2.20123899036178, 3.4278128008325, 1.41099291587891, 2.18642423799928, 1.60872940147851
C1	GSE43863_DAY6_EFF_VS_DAY150_MEM_LY6C_INT_CXCR5POS_CD4_TCELL_DN	Patient 1_Peak CAR T, Patient 1_Preinfusion, Patient 2_Preinfusion, Patient 3_Preinfusion, Patient 4_Peak CAR T	1.91720230309936, 2.80074424164158, 2.70687521917813, 2.0489062944569, 2.39196134577397
C1	GSE7460_FOXP3_MUT_VS_WT_ACT_TCONV_UP	Patient 1_Peak CAR T, Patient 1_Preinfusion, Patient 3_Preinfusion, Patient 4_Day 21, Patient 4_Peak CAR T	2.07519165946988, 2.29335733262162, 2.24218999901561, 2.17491270668504, 2.116610909691
C1	GSE7852_LN_VS_THYMUS_TREG_UP	Patient 1_Peak CAR T, Patient 1_Preinfusion, Patient 2_Preinfusion, Patient 3_Preinfusion, Patient 4_Peak CAR T	2.60947406618776, 2.11539216219833, 2.79965779291855, 2.04973174853546, 1.96928653335037
C1	GSE7852_THYMUS_VS_FAT_TCONV_DN	Patient 1_Preinfusion, Patient 2_Preinfusion, Patient 3_Preinfusion, Patient 4_Day 21, Patient 4_Peak CAR T	2.80610331886587, 2.15449518925351, 2.02248324853611, 2.07910365523233, 2.4347450874232
C1	GSE8678_IL7R_LOW_VS_HIGH_EFF_CD8_TCELL_UP	Patient 1_Peak CAR T, Patient 1_Preinfusion, Patient 1_Product, Patient 4_Peak CAR T, Patient 4_Preinfusion	1.94047453169127, 2.48609030147467, 2.0054952035132, 2.12077029514014, 2.19564452560447
C1	GSE8835_CD4_VS_CD8_TCELL_CLL_PATIENT_UP	Patient 1_Peak CAR T, Patient 1_Preinfusion, Patient 1_Product, Patient 3_Preinfusion, Patient 4_Peak CAR T	2.14828907859347, 2.4535609556301, 1.9358424137152, 1.95666127581506, 1.9926815528507
C1	GSE9650_NAIVE_VS_EFF_CD8_TCELL_DN	Patient 1_Preinfusion, Patient 1_Product, Patient 3_Peak, Patient 3_Peak CAR T, Patient 4_Product	2.05639109097358, 2.0350248540177, 2.11847853986184, 3.29918525917761, 2.2684071456043
C1	HALLMARK_P53_PATHWAY	Patient 1_Preinfusion, Patient 2_Preinfusion, Patient 3_Preinfusion, Patient 4_Peak CAR T, Patient 4_Preinfusion	1.77059075632667, 1.76603679778228, 2.25734814784807, 2.03205388470875, 1.87386037855783
C1	HALLMARK_TNFA_SIGNALING_VIA_NFKB	Patient 1_Peak CAR T, Patient 1_Preinfusion, Patient 1_Product, Patient 2_Preinfusion, Patient 4_Peak CAR T	1.75710603904618, 2.74266840171387, 2.24803494602339, 2.95793463688978, 2.60900174606604
C1	HAY_BONE_MARROW_NAIVE_T_CELL	Patient 1_Peak CAR T, Patient 2_Preinfusion, Patient 3_Preinfusion, Patient 4_Peak, Patient 4_Peak CAR T	2.34054678027779, 4.65822409982244, 1.50643900415468, 1.642871083356, 2.34233693243866
C1	IL15_UP.V1_DN	Patient 1_Peak CAR T, Patient 1_Preinfusion, Patient 2_Preinfusion, Patient 3_Preinfusion, Patient 4_Peak CAR T	1.73317562924677, 2.19505473136299, 2.6011004026206, 2.34579951007448, 1.94897567476892
C1	IL2_UP.V1_DN	Patient 1_Peak CAR T, Patient 1_Preinfusion, Patient 2_Preinfusion, Patient 3_Preinfusion, Patient 4_Peak CAR T	1.88190698797373, 2.07471223719584, 2.31598051539744, 2.34579951007448, 1.78788521720233
C1	KEGG_ANTIGEN_PROCESSING_AND_PRESENTATION	Patient 1_Preinfusion, Patient 3_Peak, Patient 3_Preinfusion, Patient 4_Peak CAR T, Patient 4_Preinfusion	2.08107572952872, 2.08227064879562, 2.22051731005109, 2.21818284056404, 2.24359044917437
C1	KEGG_CYTOSOLIC_DNA_SENSING_PATHWAY	Patient 1_Preinfusion, Patient 1_Product, Patient 2_Preinfusion, Patient 3_Product, Patient 4_Preinfusion	1.91268839996682, 1.68688646368825, 2.45727144751127, 1.63298462005214, 1.88161112970095
C1	KEGG_HEMATOPOIETIC_CELL_LINEAGE	Patient 1_Preinfusion, Patient 1_Product, Patient 3_Peak CAR T, Patient 3_Preinfusion, Patient 4_Peak CAR T	2.35718153023627, 2.00290930978882, 2.1985788629374, 2.00862423147004, 2.48905404578097
C1	LAKE_ADULT_KIDNEY_C18_COLLECTING_DUCT_PRINCIPAL_CELLS_MEDULLA	Patient 2_Peak2, Patient 2_Preinfusion, Patient 3_Peak CAR T, Patient 4_Peak, Patient 4_Peak CAR T	1.96458216658026, 2.23587430504955, 2.03140279367528, 2.92439702011639, 1.86789975042742
C1	LEF1_UP.V1_UP	Patient 1_Preinfusion, Patient 1_Product, Patient 3_Peak CAR T, Patient 4_Peak CAR T, Patient 4_Product	2.34120276203602, 2.13947343714468, 2.47476250137371, 2.12114575740251, 2.07697567423551
C1	LI_PBMC_MENOMUNE_A_C_Y_W_135_AGE_18_45YO_CORRELATED_WITH_ANTIBODY_RESPONSE_3DY_POSITIVE	Patient 1_Preinfusion, Patient 3_Peak, Patient 3_Peak CAR T, Patient 3_Preinfusion, Patient 4_Preinfusion	2.56715975499192, 2.02702131942341, 2.07522773150933, 2.41276071682632, 2.10360634209847
C1	MODULE_1	Patient 1_Peak CAR T, Patient 1_Preinfusion, Patient 1_Product, Patient 2_Preinfusion, Patient 4_Peak CAR T	2.08800293200064, 1.92844552149611, 1.7947616669694, 2.12909024918236, 2.29556407314586
C1	MODULE_200	Patient 1_Preinfusion, Patient 2_Preinfusion, Patient 3_Peak CAR T, Patient 4_Peak CAR T, Patient 4_Preinfusion	1.54718743269986, 1.60893595756416, 1.62182174312444, 1.57551023603352, 1.7554159935409
C1	MODULE_220	Patient 1_Preinfusion, Patient 1_Product, Patient 4_Day 21, Patient 4_Peak CAR T, Patient 4_Preinfusion	2.4187849976035, 1.79021456729033, 2.04207723604187, 2.07632288570102, 2.52166927053398
C1	MODULE_38	Patient 1_Peak CAR T, Patient 1_Preinfusion, Patient 1_Product, Patient 3_Preinfusion, Patient 4_Peak CAR T	2.01040834113982, 2.51155796292003, 1.78659612131535, 1.90451618508589, 2.15681480845445
C1	REACTOME_MODULATION_BY_MTB_OF_HOST_IMMUNE_SYSTEM	Patient 1_Preinfusion, Patient 2_Day 24 CART, Patient 2_Preinfusion, Patient 3_Preinfusion, Patient 4_Peak CAR T	1.92691032684303, 1.39753275749306, 1.95501342363772, 1.96828550862808, 1.7062119354132
C1	REACTOME_PD_1_SIGNALING	Patient 1_Preinfusion, Patient 3_Peak, Patient 3_Peak CAR T, Patient 3_Preinfusion, Patient 4_Peak CAR T	1.95091427590391, 2.16947571962348, 2.54550041167392, 2.18895190171441, 1.85717998923761
C1	REACTOME_SIGNALING_BY_NOTCH2	Patient 1_Preinfusion, Patient 2_Preinfusion, Patient 3_Preinfusion, Patient 4_Peak, Patient 4_Peak CAR T	2.0875474475573, 1.95501342363772, 1.96828550862808, 2.03723465442774, 1.7497889806725
C1	RUBENSTEIN_SKELETAL_MUSCLE_T_CELLS	Patient 2_Preinfusion, Patient 3_Peak CAR T, Patient 3_Preinfusion, Patient 4_Peak, Patient 4_Peak CAR T	4.34564147902799, 3.3405793655233, 1.68475385697398, 3.31216561529827, 1.74230280897399
C1	SCHERER_PBMC_APSV_WETVAX_AGE_18_40YO_5_TO_7DY_DN	Patient 1_Peak CAR T, Patient 1_Preinfusion, Patient 3_Preinfusion, Patient 4_Peak CAR T, Patient 4_Preinfusion	1.33982850656091, 2.05104863736253, 1.66549606982897, 1.80537249161452, 1.78932293367337
C1	Transcription.factors	Patient 1_Peak CAR T, Patient 1_Preinfusion, Patient 2_Preinfusion, Patient 3_Product, Patient 4_Peak CAR T	1.85210708817697, 1.92199420543497, 1.68892038097909, 1.49269041928137, 1.74808367548076
C1	VEGF_A_UP.V1_UP	Patient 1_Peak CAR T, Patient 1_Preinfusion, Patient 1_Product, Patient 2_Preinfusion, Patient 4_Peak CAR T	2.28389587282469, 2.51844093855349, 2.38743628954449, 2.24076212325159, 2.09574564563719
C1	ZHENG_CORD_BLOOD_C10_MULTILYMPHOID_PROGENITOR	Patient 1_Preinfusion, Patient 1_Product, Patient 2_Preinfusion, Patient 2_Product, Patient 4_Peak CAR T	1.8473003156642, 1.75825267563199, 2.25002044396628, 1.67209560465559, 2.24978478057173
C1	ZHENG_CORD_BLOOD_C5_SIMILAR_TO_HSC_C6_PUTATIVE_ALTERED_METABOLIC_STATE	Patient 1_Peak CAR T, Patient 1_Preinfusion, Patient 1_Product, Patient 2_Preinfusion, Patient 4_Peak CAR T	1.85171528871324, 1.73781725196673, 1.93428103598964, 1.7822884212039, 2.61141315963433
C1	ZHONG_PFC_MAJOR_TYPES_ASTROCYTES	Patient 1_Peak CAR T, Patient 3_Peak, Patient 3_Peak CAR T, Patient 3_Preinfusion, Patient 4_Peak CAR T	1.94863247397058, 2.18342895821034, 2.20555324137541, 1.82952144149074, 1.88312736321674
C1	AIZARANI_LIVER_C29_MVECS_2	Patient 1_Preinfusion, Patient 1_Product, Patient 3_Peak, Patient 4_Peak CAR T	1.56821528304066, 1.75530843444314, 2.01472340956633, 2.08737033428116
C1	BIOCARTA_NKCELLS_PATHWAY	Patient 1_Preinfusion, Patient 2_Day 24 CART, Patient 3_Preinfusion, Patient 4_Peak CAR T	1.84717196623231, 1.40061727004438, 2.05844772342168, 1.87887616373566
C1	BIOCARTA_NO2IL12_PATHWAY	Patient 1_Preinfusion, Patient 3_Preinfusion, Patient 4_Peak CAR T, Patient 4_Preinfusion	1.93338699647786, 2.4205354163423, 2.10093320667874, 2.06101000258862
C1	BIOCARTA_TCYTOTOXIC_PATHWAY	Patient 1_Product, Patient 3_Preinfusion, Patient 4_Peak CAR T, Patient 4_Preinfusion	2.03246466707749, 2.1248694101319, 2.16755814363128, 2.17797829708878
C1	BIOCARTA_THELPER_PATHWAY	Patient 1_Product, Patient 3_Preinfusion, Patient 4_Peak CAR T, Patient 4_Preinfusion	1.88377317084455, 2.10549909251007, 2.01179723757838, 1.95871207507726
C1	BUSSLINGER_GASTRIC_MATURE_PIT_CELLS	Patient 1_Preinfusion, Patient 3_Peak, Patient 4_Peak, Patient 4_Peak CAR T	1.783355223719, 2.07412057265855, 1.68401265770303, 1.76618735785715
C1	BUSSLINGER_GASTRIC_REG3A_POSITIVE_CELLS	Patient 1_Preinfusion, Patient 2_Day 24 CART, Patient 3_Peak, Patient 3_Preinfusion	2.22574702466689, 1.40866206406642, 1.89365333996919, 1.86557828184284
C1	CUI_DEVELOPING_HEART_VALVAR_ENDOTHELIAL_CELL	Patient 1_Peak CAR T, Patient 1_Preinfusion, Patient 3_Preinfusion, Patient 4_Peak CAR T	1.94364692156585, 2.83747392458557, 2.22492739324468, 2.19547980061391
C1	DESCARTES_FETAL_CEREBRUM_MICROGLIA	Patient 1_Peak CAR T, Patient 1_Preinfusion, Patient 2_Preinfusion, Patient 4_Peak CAR T	1.89181771516074, 2.58894445446421, 2.54031630681639, 1.72489724453534
C1	DESCARTES_FETAL_EYE_CORNEAL_AND_CONJUNCTIVAL_EPITHELIAL_CELLS	Patient 1_Peak CAR T, Patient 1_Preinfusion, Patient 3_Peak CAR T, Patient 4_Peak CAR T	1.76134160138433, 2.4414547753649, 1.99861821925426, 2.26796165765315
C1	DESCARTES_FETAL_PLACENTA_TROPHOBLAST_GIANT_CELLS	Patient 1_Peak CAR T, Patient 1_Preinfusion, Patient 3_Peak CAR T, Patient 4_Peak	1.3182433234515, 1.32920631705842, 1.32376727067, 1.34081356662854
C1	DESCARTES_FETAL_THYMUS_ANTIGEN_PRESENTING_CELLS	Patient 1_Peak CAR T, Patient 1_Preinfusion, Patient 1_Product, Patient 3_Preinfusion	1.90632416486885, 2.31614063519105, 1.76691799927997, 2.27777996736056
C1	DESCARTES_MAIN_FETAL_TROPHOBLAST_GIANT_CELLS	Patient 1_Peak CAR T, Patient 1_Preinfusion, Patient 3_Preinfusion, Patient 4_Peak CAR T	1.3182433234515, 1.80735581002839, 1.56793677561029, 1.64732430137129
C1	E2F1_UP.V1_DN	Patient 1_Peak CAR T, Patient 1_Preinfusion, Patient 2_Preinfusion, Patient 4_Peak CAR T	1.94815341303552, 2.22002077291341, 2.32266436762885, 2.21485304931743
C1	FAN_EMBRYONIC_CTX_BRAIN_B_CELL	Patient 1_Preinfusion, Patient 2_Preinfusion, Patient 3_Preinfusion, Patient 4_Peak CAR T	2.80436598816583, 2.51022992291391, 1.76359557217595, 1.84190295490449
C1	FAN_EMBRYONIC_CTX_MICROGLIA_2	Patient 1_Preinfusion, Patient 1_Product, Patient 3_Product, Patient 4_Peak CAR T	1.48656562576337, 1.73027358201805, 1.57826804220463, 1.68171845438083
C1	FAN_OVARY_CL2_PUTATIVE_EARLY_ATRETIC_FOLLICLE_THECAL_CELL_1	Patient 2_Preinfusion, Patient 3_Peak CAR T, Patient 4_Peak, Patient 4_Peak CAR T	2.63032069928609, 1.95196529323181, 3.22819305278303, 1.94223609486362
C1	FAN_OVARY_CL7_ANGEIOGENIC_ENDOTHELIAL_CELL	Patient 1_Peak CAR T, Patient 1_Preinfusion, Patient 3_Preinfusion, Patient 4_Peak CAR T	1.81703407437525, 2.22103348101638, 1.63019741491296, 2.54031252621967
C1	GNF2_CASP1	Patient 1_Preinfusion, Patient 1_Product, Patient 2_Preinfusion, Patient 4_Peak CAR T	1.93428466527754, 1.77247654987672, 1.61575558248726, 1.79757879468649
C1	GNF2_CD53	Patient 1_Peak CAR T, Patient 1_Preinfusion, Patient 2_Day 24 CART, Patient 2_Preinfusion	2.04871243899809, 2.77973669410122, 1.41049604601007, 2.03561316844653
C1	GNF2_MCL1	Patient 1_Preinfusion, Patient 1_Product, Patient 2_Preinfusion, Patient 4_Peak CAR T	2.00701227576881, 1.607432948481, 1.7739251917089, 1.71143455535011
C1	GNF2_RAP1B	Patient 1_Peak CAR T, Patient 1_Preinfusion, Patient 2_Preinfusion, Patient 4_Peak CAR T	2.2457384340361, 2.49343897423968, 1.95758640346699, 2.36277326183113
C1	GNF2_VAV1	Patient 1_Preinfusion, Patient 2_Preinfusion, Patient 3_Preinfusion, Patient 4_Peak CAR T	2.79044324243385, 2.42193698879484, 1.92465466126683, 2.01254953595426
C1	GOBP_ANTIGEN_PROCESSING_AND_PRESENTATION_OF_ENDOGENOUS_PEPTIDE_ANTIGEN_VIA_MHC_CLASS_I_VIA_ER_PATHWAY	Patient 1_Preinfusion, Patient 2_Preinfusion, Patient 3_Preinfusion, Patient 4_Peak CAR T	2.24416358009559, 2.17558089644656, 2.0420268921195, 1.75169687587009
C1	GOBP_LYMPHOCYTE_ACTIVATION	Patient 1_Peak CAR T, Patient 1_Preinfusion, Patient 1_Product, Patient 4_Peak CAR T	2.24483517204097, 2.30476741015155, 2.37124742944353, 2.15067253609113
C1	GOBP_LYMPHOCYTE_MIGRATION	Patient 1_Preinfusion, Patient 1_Product, Patient 3_Product, Patient 4_Peak CAR T	2.21234317046171, 1.98368846587112, 1.83298913558341, 2.2945562720018
C1	GOBP_NEGATIVE_REGULATION_OF_DEFENSE_RESPONSE	Patient 1_Preinfusion, Patient 3_Preinfusion, Patient 4_Peak CAR T, Patient 4_Preinfusion	2.18751833537109, 2.30389178354756, 1.8727306891505, 2.72172866380362
C1	GOBP_POSITIVE_REGULATION_OF_IMMUNE_EFFECTOR_PROCESS	Patient 1_Preinfusion, Patient 3_Preinfusion, Patient 4_Peak CAR T, Patient 4_Preinfusion	2.45562783230998, 2.25103636214032, 1.83526854343867, 2.25086241294483
C1	GOBP_POSITIVE_REGULATION_OF_IMMUNE_SYSTEM_PROCESS	Patient 1_Preinfusion, Patient 1_Product, Patient 3_Preinfusion, Patient 4_Peak CAR T	2.0755755382335, 2.40965556155438, 1.76500801738234, 1.57110701523927
C1	GOBP_POSITIVE_REGULATION_OF_LEUKOCYTE_APOPTOTIC_PROCESS	Patient 1_Preinfusion, Patient 3_Peak, Patient 3_Peak CAR T, Patient 3_Preinfusion	2.124366358114, 1.68393451984436, 1.72273954740348, 1.96928290296035
C1	GOBP_POSITIVE_REGULATION_OF_LYMPHOCYTE_CHEMOTAXIS	Patient 1_Preinfusion, Patient 1_Product, Patient 3_Product, Patient 4_Preinfusion	1.83268312995888, 2.05215960337631, 1.83298913558341, 1.67431020985967
C1	GOBP_REGULATION_OF_CELL_ACTIVATION	Patient 1_Preinfusion, Patient 1_Product, Patient 3_Preinfusion, Patient 4_Peak CAR T	2.78871695028034, 2.17667990000011, 1.84630048397444, 2.14836605058611
C1	GOBP_REGULATION_OF_INFLAMMATORY_RESPONSE	Patient 1_Preinfusion, Patient 1_Product, Patient 2_Preinfusion, Patient 3_Preinfusion	2.58241690754664, 2.04172902338856, 2.6405357060176, 2.35540082937985
C1	GOBP_REGULATION_OF_LYMPHOCYTE_CHEMOTAXIS	Patient 1_Preinfusion, Patient 1_Product, Patient 3_Product, Patient 4_Preinfusion	1.83268312995888, 2.05215960337631, 1.83298913558341, 1.67431020985967
C1	GOCC_ACTIN_BASED_CELL_PROJECTION	Patient 1_Preinfusion, Patient 1_Preinfusion, Patient 3_Preinfusion, Patient 3_Preinfusion	2.60845743886637, 2.60281477466406, 2.520966566736, 2.49432572556666
C1	GOCC_COATED_VESICLE	Patient 1_Preinfusion, Patient 1_Preinfusion, Patient 3_Preinfusion, Patient 4_Preinfusion	2.19256209905328, 2.16527778199868, 1.86955030810036, 2.03186966162335
C1	GOCC_COLLAGEN_CONTAINING_EXTRACELLULAR_MATRIX	Patient 1_Preinfusion, Patient 3_Peak, Patient 3_Peak CAR T, Patient 4_Peak CAR T	1.91881459296882, 2.22247646427219, 2.08057989364179, 1.8344392955807
C1	GOCC_CYTOSOLIC_RIBOSOME	Patient 2_Preinfusion, Patient 2_Preinfusion, Patient 4_Peak, Patient 4_Peak	4.44366149797361, 4.42450067259007, 3.51960082101922, 3.47214529694143
C1	GOCC_INTRINSIC_COMPONENT_OF_ENDOPLASMIC_RETICULUM_MEMBRANE	Patient 1_Preinfusion, Patient 2_Day 24 CART, Patient 2_Day 24 CART, Patient 3_Preinfusion	1.92231741120154, 1.41652337300006, 1.40441200862498, 2.05543852033291
C1	GOCC_LUMENAL_SIDE_OF_ENDOPLASMIC_RETICULUM_MEMBRANE	Patient 1_Preinfusion, Patient 1_Preinfusion, Patient 3_Preinfusion, Patient 3_Preinfusion	2.39346260941594, 2.37762643141733, 2.15024260864392, 2.12293293874738
C1	GOCC_MHC_CLASS_I_PEPTIDE_LOADING_COMPLEX	Patient 1_Preinfusion, Patient 1_Preinfusion, Patient 2_Day 24 CART, Patient 2_Day 24 CART	1.83167450451644, 1.82985412469981, 1.41652337300006, 1.40441200862498
C1	GOCC_POLYSOMAL_RIBOSOME	Patient 2_Preinfusion, Patient 2_Preinfusion, Patient 4_Peak, Patient 4_Peak	2.30766263720781, 2.29923260012382, 2.56755169205044, 2.52588604533309
C1	GOCC_SECRETORY_GRANULE_MEMBRANE	Patient 1_Preinfusion, Patient 1_Preinfusion, Patient 4_Peak CAR T, Patient 4_Preinfusion	2.60693102566705, 2.59559946801471, 1.69914789942766, 2.21076781115489
C1	GOCC_SMALL_RIBOSOMAL_SUBUNIT	Patient 2_Preinfusion, Patient 2_Preinfusion, Patient 4_Peak, Patient 4_Peak	2.83643778836117, 2.79924495410322, 2.75123049139775, 2.71975745526033
C1	GOCC_TERTIARY_GRANULE	Patient 1_Preinfusion, Patient 1_Preinfusion, Patient 4_Peak CAR T, Patient 4_Peak CAR T	2.31157679279654, 2.30682133556101, 2.11890607668448, 2.10364280264245
C1	GOCC_VACUOLE	Patient 1_Preinfusion, Patient 1_Preinfusion, Patient 4_Preinfusion, Patient 4_Preinfusion	2.00047326557172, 1.97866335378514, 2.32970794423265, 2.30517747030569
C1	GOMF_CALCIUM_DEPENDENT_PROTEIN_BINDING	Patient 1_Preinfusion, Patient 1_Preinfusion, Patient 3_Peak, Patient 3_Peak	2.24204688526011, 2.23590877136379, 2.29287454007647, 2.27791908716402
C1	GOMF_CYTOKINE_RECEPTOR_BINDING	Patient 1_Preinfusion, Patient 1_Preinfusion, Patient 1_Product, Patient 1_Product	2.17556207486884, 2.16525629441231, 2.25829376335, 2.24401175810875
C1	GOMF_DNA_BINDING_TRANSCRIPTION_FACTOR_ACTIVITY	Patient 1_Preinfusion, Patient 1_Preinfusion, Patient 4_Peak CAR T, Patient 4_Peak CAR T	1.93144183277066, 1.91530886143909, 2.30368225012754, 2.29820944596908
C1	GOMF_G_PROTEIN_COUPLED_RECEPTOR_ACTIVITY	Patient 1_Preinfusion, Patient 1_Preinfusion, Patient 4_Peak CAR T, Patient 4_Peak CAR T	2.06499788737549, 2.06213322451597, 2.35398407029106, 2.35247723317618
C1	GOMF_G_PROTEIN_COUPLED_RECEPTOR_BINDING	Patient 1_Product, Patient 1_Product, Patient 3_Product, Patient 3_Product	2.02529566269787, 2.02325995241536, 1.83298913558341, 1.81797072558962
C1	GOMF_LIPASE_ACTIVATOR_ACTIVITY	Patient 1_Preinfusion, Patient 1_Preinfusion, Patient 1_Product, Patient 1_Product	1.33338932562245, 1.33226872016808, 1.66819359271511, 1.6628445344848
C1	GOMF_PEPTIDE_ANTIGEN_BINDING	Patient 1_Preinfusion, Patient 1_Preinfusion, Patient 3_Preinfusion, Patient 3_Preinfusion	2.70864878073695, 2.70123323789947, 2.27452007868097, 2.24128761229478
C1	GOMF_SIGNALING_RECEPTOR_BINDING	Patient 1_Preinfusion, Patient 1_Preinfusion, Patient 1_Product, Patient 1_Product	1.84911428848615, 1.81973681854366, 2.16696352994584, 2.16532353605808
C1	GOMF_STRUCTURAL_CONSTITUENT_OF_RIBOSOME	Patient 1_Day 7, Patient 1_Day 7, Patient 4_Peak, Patient 4_Peak	2.80383366723139, 2.80117665359198, 3.41926828012545, 3.36983080103312
C1	GSE11386_NAIVE_VS_MEMORY_BCELL_DN	Patient 1_Peak CAR T, Patient 1_Preinfusion, Patient 2_Preinfusion, Patient 4_Peak CAR T	2.00210380213374, 2.40467101861416, 2.04812548202124, 1.89079413854339
C1	GSE11961_MEMORY_BCELL_DAY7_VS_GERMINAL_CENTER_BCELL_DAY7_UP	Patient 1_Peak CAR T, Patient 1_Preinfusion, Patient 1_Product, Patient 4_Peak CAR T	2.07524248820624, 2.52760462019001, 2.28430357380846, 2.19330270481539
C1	GSE12366_GC_VS_MEMORY_BCELL_DN	Patient 1_Peak CAR T, Patient 1_Preinfusion, Patient 2_Preinfusion, Patient 4_Peak CAR T	2.4001535370883, 2.80084589090083, 2.84351563991243, 2.16867163192301
C1	GSE12366_GC_VS_NAIVE_BCELL_DN	Patient 1_Peak CAR T, Patient 1_Preinfusion, Patient 2_Preinfusion, Patient 4_Peak CAR T	2.23815820296902, 2.80537360231843, 2.26023767987606, 1.93547386960335
C1	GSE13411_IGM_MEMORY_BCELL_VS_PLASMA_CELL_UP	Patient 1_Preinfusion, Patient 2_Preinfusion, Patient 3_Preinfusion, Patient 4_Peak CAR T	2.30062708254965, 1.84659161621183, 1.97772875329018, 1.74518209750867
C1	GSE13522_WT_VS_IFNAR_KO_SKIN_DN	Patient 1_Preinfusion, Patient 3_Peak CAR T, Patient 4_Peak CAR T, Patient 4_Product	2.18965286285313, 2.37838759714937, 1.66065148114171, 2.02157065703271
C1	GSE14415_INDUCED_VS_NATURAL_TREG_UP	Patient 1_Peak CAR T, Patient 1_Preinfusion, Patient 2_Preinfusion, Patient 4_Peak CAR T	2.07479939866928, 2.03443453652415, 2.75978361286354, 2.40923014709704
C1	GSE1460_INTRATHYMIC_T_PROGENITOR_VS_DP_THYMOCYTE_DN	Patient 1_Peak CAR T, Patient 1_Preinfusion, Patient 1_Product, Patient 4_Peak CAR T	2.14263698267159, 1.89605212448665, 2.02229419046853, 1.81617603886538
C1	GSE1460_INTRATHYMIC_T_PROGENITOR_VS_NAIVE_CD4_TCELL_ADULT_BLOOD_DN	Patient 1_Peak CAR T, Patient 1_Preinfusion, Patient 2_Preinfusion, Patient 4_Peak CAR T	1.86120156228191, 2.34775413648403, 2.95870292747652, 2.16149422013096
C1	GSE14699_NAIVE_VS_DELETIONAL_TOLERANCE_CD8_TCELL_DN	Patient 1_Preinfusion, Patient 2_Preinfusion, Patient 3_Preinfusion, Patient 4_Peak CAR T	2.62143763380092, 1.74060825499529, 2.00179961747831, 1.94967139795878
C1	GSE17301_CTRL_VS_48H_ACD3_ACD28_STIM_CD8_TCELL_UP	Patient 1_Peak CAR T, Patient 1_Preinfusion, Patient 2_Preinfusion, Patient 4_Peak CAR T	1.86231094196829, 1.77845565636523, 1.89552908355326, 1.89784998573225
C1	GSE17301_CTRL_VS_48H_IFNA2_STIM_CD8_TCELL_DN	Patient 1_Preinfusion, Patient 1_Product, Patient 3_Preinfusion, Patient 4_Preinfusion	2.24778122571239, 2.0237447465031, 2.12222516680422, 2.10253107002432
C1	GSE17580_TREG_VS_TEFF_S_MANSONI_INF_DN	Patient 1_Preinfusion, Patient 1_Product, Patient 2_Preinfusion, Patient 4_Peak CAR T	1.96694206874583, 2.20316093203529, 1.69981679455551, 1.57962968319566
C1	GSE17721_0.5H_VS_24H_CPG_BMDC_DN	Patient 1_Peak CAR T, Patient 1_Preinfusion, Patient 2_Preinfusion, Patient 3_Preinfusion	2.37911988973271, 2.17961152611401, 2.24919534659563, 2.12216824380186
C1	GSE17974_0H_VS_24H_IN_VITRO_ACT_CD4_TCELL_UP	Patient 1_Peak CAR T, Patient 1_Preinfusion, Patient 2_Preinfusion, Patient 4_Peak CAR T	2.31660974801152, 1.99615380914643, 3.43255086071579, 2.97876382763012
C1	GSE17974_0H_VS_48H_IN_VITRO_ACT_CD4_TCELL_UP	Patient 1_Peak CAR T, Patient 1_Preinfusion, Patient 2_Preinfusion, Patient 4_Peak CAR T	2.17844421582488, 1.83685090386145, 2.18832851345855, 2.42320827622952
C1	GSE17974_0H_VS_4H_IN_VITRO_ACT_CD4_TCELL_UP	Patient 1_Peak CAR T, Patient 1_Preinfusion, Patient 2_Preinfusion, Patient 4_Peak CAR T	1.9724337751542, 2.13294478325041, 1.83031359672154, 2.56474593321672
C1	GSE17974_0H_VS_6H_IN_VITRO_ACT_CD4_TCELL_UP	Patient 1_Peak CAR T, Patient 1_Preinfusion, Patient 2_Preinfusion, Patient 4_Peak CAR T	1.99707599350134, 2.22433107458641, 2.0895147150109, 2.50588844924898
C1	GSE17974_CTRL_VS_ACT_IL4_AND_ANTI_IL12_12H_CD4_TCELL_UP	Patient 1_Peak CAR T, Patient 1_Preinfusion, Patient 2_Preinfusion, Patient 4_Peak CAR T	2.26490112324571, 1.92522156847174, 2.26136883396383, 2.6461132513447
C1	GSE17974_CTRL_VS_ACT_IL4_AND_ANTI_IL12_4H_CD4_TCELL_UP	Patient 1_Peak CAR T, Patient 1_Preinfusion, Patient 2_Preinfusion, Patient 4_Peak CAR T	2.07301045385197, 2.16241309197822, 1.79649861163171, 2.06130493582301
C1	GSE18893_TCONV_VS_TREG_24H_CULTURE_UP	Patient 1_Peak CAR T, Patient 1_Preinfusion, Patient 3_Peak CAR T, Patient 4_Peak CAR T	2.05089449862333, 1.87956827428696, 3.05007043995401, 1.77056902514473
C1	GSE18893_TCONV_VS_TREG_2H_TNF_STIM_DN	Patient 1_Preinfusion, Patient 2_Preinfusion, Patient 3_Preinfusion, Patient 4_Peak CAR T	2.89248406039873, 3.6880497241608, 2.58963140572579, 2.4175485279261
C1	GSE19772_HCMV_INFL_VS_HCMV_INF_MONOCYTES_AND_PI3K_INHIBITION_DN	Patient 1_Peak CAR T, Patient 3_Peak, Patient 3_Preinfusion, Patient 4_Peak CAR T	1.88526583508509, 2.28684674417409, 2.17618752605095, 1.58091405838342
C1	GSE19888_ADENOSINE_A3R_INH_PRETREAT_AND_ACT_BY_A3R_VS_TCELL_MEMBRANES_ACT_MAST_CELL_UP	Patient 1_Peak CAR T, Patient 1_Preinfusion, Patient 2_Preinfusion, Patient 4_Peak CAR T	2.89732196195044, 3.37273350370093, 1.90901199889078, 1.66109583216392
C1	GSE19941_UNSTIM_VS_LPS_STIM_IL10_KO_MACROPHAGE_UP	Patient 1_Peak CAR T, Patient 1_Preinfusion, Patient 3_Preinfusion, Patient 4_Peak CAR T	2.06841297224458, 2.12396155094173, 2.29170969273225, 1.97117140610097
C1	GSE20366_TREG_VS_NAIVE_CD4_TCELL_HOMEOSTATIC_CONVERSION_DN	Patient 1_Peak CAR T, Patient 1_Preinfusion, Patient 2_Preinfusion, Patient 4_Peak CAR T	2.22965331794192, 2.37166766214358, 2.52523485495255, 1.66216096242804
C1	GSE20715_0H_VS_48H_OZONE_LUNG_UP	Patient 1_Preinfusion, Patient 2_Preinfusion, Patient 3_Preinfusion, Patient 4_Peak CAR T	1.88711183723574, 2.03327220705884, 1.96926486236108, 1.80869014934843
C1	GSE21033_CTRL_VS_POLYIC_STIM_DC_24H_UP	Patient 1_Peak CAR T, Patient 1_Preinfusion, Patient 2_Preinfusion, Patient 4_Peak CAR T	2.11916906561783, 2.16180721944177, 2.34907271948768, 1.89925291038448
C1	GSE21063_WT_VS_NFATC1_KO_BCELL_UP	Patient 1_Peak CAR T, Patient 2_Preinfusion, Patient 3_Preinfusion, Patient 4_Peak CAR T	2.05142018086048, 1.96300784633051, 2.21174734464323, 1.81844948350032
C1	GSE21379_WT_VS_SAP_KO_TFH_CD4_TCELL_DN	Patient 1_Peak CAR T, Patient 1_Preinfusion, Patient 1_Product, Patient 2_Preinfusion	2.0920296145112, 2.11822122022095, 2.07037318261251, 2.59273653442731
C1	GSE21546_ELK1_KO_VS_SAP1A_KO_AND_ELK1_KO_DP_THYMOCYTES_UP	Patient 1_Preinfusion, Patient 2_Day 24 CART, Patient 3_Preinfusion, Patient 4_Peak CAR T	3.31597955122759, 1.41099291587891, 2.12373405144175, 2.14870478459245
C1	GSE21546_WT_VS_SAP1A_KO_DP_THYMOCYTES_UP	Patient 1_Peak CAR T, Patient 1_Preinfusion, Patient 2_Day 24 CART, Patient 4_Peak CAR T	2.0885202430153, 3.4239341657944, 1.41099291587891, 1.64353866878609
C1	GSE21670_STAT3_KO_VS_WT_CD4_TCELL_TGFB_IL6_TREATED_UP	Patient 1_Peak CAR T, Patient 1_Preinfusion, Patient 3_Peak CAR T, Patient 3_Preinfusion	2.01857356804389, 1.85499787127789, 2.13955790228371, 2.01354423625623
C1	GSE22432_MULTIPOTENT_PROGENITOR_VS_CDC_UP	Patient 1_Peak CAR T, Patient 1_Preinfusion, Patient 3_Preinfusion, Patient 4_Peak CAR T	2.21076033483787, 2.49216873154973, 2.2084243932377, 1.98583269286406
C1	GSE22432_MULTIPOTENT_PROGENITOR_VS_PDC_UP	Patient 1_Peak CAR T, Patient 1_Preinfusion, Patient 2_Day 24 CART, Patient 2_Preinfusion	2.07673871653097, 2.11710572780526, 1.41099291587891, 1.68142145373907
C1	GSE22601_DOUBLE_POSITIVE_VS_CD8_SINGLE_POSITIVE_THYMOCYTE_UP	Patient 1_Peak CAR T, Patient 1_Preinfusion, Patient 2_Preinfusion, Patient 4_Peak CAR T	2.48884480465963, 2.60965381723501, 2.72309110555895, 2.13635044664245
C1	GSE22601_IMMATURE_CD4_SINGLE_POSITIVE_VS_CD8_SINGLE_POSITIVE_THYMOCYTE_UP	Patient 1_Peak CAR T, Patient 1_Preinfusion, Patient 2_Preinfusion, Patient 4_Peak CAR T	2.37923227999247, 2.10765746318971, 2.76347471309228, 2.45874792714643
C1	GSE22611_NOD2_TRANSDUCED_VS_CTRL_HEK293T_STIMULATED_WITH_MDP_2H_UP	Patient 1_Peak CAR T, Patient 1_Preinfusion, Patient 2_Preinfusion, Patient 4_Peak CAR T	2.32965793776322, 2.22897029210723, 2.79503001227664, 1.8556987035694
C1	GSE22886_NAIVE_CD4_TCELL_VS_12H_ACT_TH1_UP	Patient 1_Peak CAR T, Patient 1_Preinfusion, Patient 2_Preinfusion, Patient 4_Peak CAR T	2.16569281231211, 2.17854375497605, 3.21444270908989, 2.04623800668274
C1	GSE22886_NAIVE_CD4_TCELL_VS_NEUTROPHIL_DN	Patient 1_Preinfusion, Patient 3_Peak CAR T, Patient 3_Preinfusion, Patient 4_Peak CAR T	1.85012827990547, 2.04772461366169, 2.11484787422289, 1.84819804576403
C1	GSE23505_UNTREATED_VS_4DAY_IL6_IL1_IL23_TREATED_CD4_TCELL_DN	Patient 1_Peak CAR T, Patient 1_Preinfusion, Patient 2_Preinfusion, Patient 4_Peak CAR T	2.06243010354909, 2.38279254801947, 2.81869849479438, 2.27717663468074
C1	GSE23568_CTRL_VS_ID3_TRANSDUCED_CD8_TCELL_UP	Patient 1_Peak CAR T, Patient 1_Preinfusion, Patient 2_Preinfusion, Patient 4_Peak CAR T	2.07960806710091, 1.73799824822746, 1.8722932015627, 1.7395812643751
C1	GSE2405_S_AUREUS_VS_A_PHAGOCYTOPHILUM_NEUTROPHIL_UP	Patient 1_Peak CAR T, Patient 1_Preinfusion, Patient 2_Preinfusion, Patient 4_Peak CAR T	1.87749832604508, 2.49507235497122, 1.81690133138254, 2.25611877314173
C1	GSE24142_EARLY_THYMIC_PROGENITOR_VS_DN3_THYMOCYTE_ADULT_UP	Patient 1_Preinfusion, Patient 2_Preinfusion, Patient 3_Preinfusion, Patient 4_Peak CAR T	2.6106299893736, 2.26379205665858, 2.40060538116101, 2.28455912421519
C1	GSE24634_NAIVE_CD4_TCELL_VS_DAY3_IL4_CONV_TREG_UP	Patient 1_Preinfusion, Patient 2_Preinfusion, Patient 3_Preinfusion, Patient 4_Peak CAR T	2.10633356025076, 3.10619941418149, 2.22262695294016, 2.35060305552387
C1	GSE24634_TEFF_VS_TCONV_DAY5_IN_CULTURE_DN	Patient 1_Peak CAR T, Patient 1_Preinfusion, Patient 2_Preinfusion, Patient 4_Peak CAR T	2.08734343770473, 2.12884232801354, 2.39823830040772, 2.04425705429939
C1	GSE26669_CTRL_VS_COSTIM_BLOCK_MLR_CD8_TCELL_DN	Patient 1_Peak CAR T, Patient 1_Preinfusion, Patient 3_Preinfusion, Patient 4_Peak CAR T	1.97174821030994, 2.53337523094899, 2.07650647890383, 2.32933961782694
C1	GSE26928_CENTR_MEMORY_VS_CXCR5_POS_CD4_TCELL_UP	Patient 3_Peak, Patient 3_Peak CAR T, Patient 4_Peak, Patient 4_Peak CAR T	2.25981474510558, 2.76691508927133, 2.49293156498253, 1.63347166628049
C1	GSE29618_MONOCYTE_VS_PDC_UP	Patient 1_Preinfusion, Patient 1_Product, Patient 4_Peak CAR T, Patient 4_Preinfusion	2.4159725528345, 2.04662124900778, 1.86066443091882, 2.12678704605453
C1	GSE3039_ALPHAALPHA_VS_ALPHABETA_CD8_TCELL_DN	Patient 1_Preinfusion, Patient 3_Preinfusion, Patient 4_Peak CAR T, Patient 4_Preinfusion	2.2485355481774, 1.96764265968589, 2.37237638793196, 2.13733842083852
C1	GSE3039_CD4_TCELL_VS_B1_BCELL_DN	Patient 1_Peak CAR T, Patient 1_Preinfusion, Patient 3_Peak, Patient 4_Peak CAR T	2.1052462681029, 2.29033082866452, 2.30754350585508, 2.6013727201192
C1	GSE3039_CD4_TCELL_VS_NKT_CELL_UP	Patient 1_Peak CAR T, Patient 1_Preinfusion, Patient 2_Preinfusion, Patient 4_Peak CAR T	2.19480839826602, 2.04215488867995, 1.84379449610105, 1.61834391745552
C1	GSE31082_DN_VS_CD8_SP_THYMOCYTE_DN	Patient 1_Peak CAR T, Patient 1_Preinfusion, Patient 2_Preinfusion, Patient 4_Peak CAR T	2.38191719761083, 3.22815580753587, 2.13846623338941, 1.92909225156167
C1	GSE3337_4H_VS_16H_IFNG_IN_CD8POS_DC_DN	Patient 1_Preinfusion, Patient 2_Preinfusion, Patient 3_Peak CAR T, Patient 4_Peak CAR T	1.94974068547171, 2.07198839303029, 2.33847837095464, 1.65161268419407
C1	GSE33374_CD8_ALPHAALPHA_VS_ALPHABETA_CD161_HIGH_TCELL_DN	Patient 1_Preinfusion, Patient 3_Preinfusion, Patient 4_Peak CAR T, Patient 4_Preinfusion	2.31950045668459, 2.16269328537773, 2.16756198431859, 2.12289560518907
C1	GSE360_CTRL_VS_T_GONDII_DC_UP	Patient 1_Peak CAR T, Patient 2_Preinfusion, Patient 3_Preinfusion, Patient 4_Preinfusion	1.90022861036806, 2.04399288518583, 2.19892523944594, 2.07846689534173
C1	GSE360_L_DONOVANI_VS_M_TUBERCULOSIS_MAC_DN	Patient 1_Peak CAR T, Patient 1_Preinfusion, Patient 3_Preinfusion, Patient 4_Peak CAR T	1.90338336880851, 2.74293583011028, 1.91528923352013, 1.77533976296154
C1	GSE360_T_GONDII_VS_M_TUBERCULOSIS_MAC_DN	Patient 1_Preinfusion, Patient 2_Preinfusion, Patient 3_Preinfusion, Patient 4_Peak CAR T	1.92478558702456, 1.82217383729886, 2.1830657933773, 1.90428214114574
C1	GSE36078_WT_VS_IL1R_KO_LUNG_DC_UP	Patient 1_Peak CAR T, Patient 1_Preinfusion, Patient 3_Preinfusion, Patient 4_Peak CAR T	2.79081657398357, 2.77452515155903, 2.36757080233526, 1.93885317439434
C1	GSE36095_WT_VS_HDAC9_KO_TREG_DN	Patient 1_Preinfusion, Patient 2_Day 24 CART, Patient 2_Preinfusion, Patient 4_Peak CAR T	2.23004370302465, 1.41099291587891, 1.92180086927681, 1.82200662830863
C1	GSE36476_CTRL_VS_TSST_ACT_40H_MEMORY_CD4_TCELL_OLD_UP	Patient 1_Peak CAR T, Patient 1_Preinfusion, Patient 2_Preinfusion, Patient 4_Peak CAR T	1.65555533250985, 2.43005497600573, 3.32011954890882, 2.7887654895334
C1	GSE36476_CTRL_VS_TSST_ACT_40H_MEMORY_CD4_TCELL_YOUNG_UP	Patient 1_Preinfusion, Patient 1_Product, Patient 2_Preinfusion, Patient 4_Peak CAR T	2.37307080880524, 2.10156366454148, 3.81424123291416, 2.86380492047099
C1	GSE369_PRE_VS_POST_IL6_INJECTION_IFNG_WT_LIVER_UP	Patient 1_Peak CAR T, Patient 1_Preinfusion, Patient 2_Preinfusion, Patient 4_Peak CAR T	2.40936746531444, 2.18739871344361, 1.78153291658933, 1.78200928230377
C1	GSE37301_HEMATOPOIETIC_STEM_CELL_VS_CD4_TCELL_DN	Patient 1_Peak CAR T, Patient 1_Preinfusion, Patient 4_Peak CAR T, Patient 4_Preinfusion	1.97364853267841, 2.00094656391304, 1.84793471329806, 2.11727447054914
C1	GSE39110_DAY3_VS_DAY6_POST_IMMUNIZATION_CD8_TCELL_WITH_IL2_TREATMENT_DN	Patient 1_Peak CAR T, Patient 1_Preinfusion, Patient 2_Preinfusion, Patient 4_Peak CAR T	2.20693632231978, 1.97515221336675, 2.87145790994513, 2.26467995127407
C1	GSE3920_UNTREATED_VS_IFNA_TREATED_ENDOTHELIAL_CELL_UP	Patient 1_Peak CAR T, Patient 1_Preinfusion, Patient 2_Preinfusion, Patient 4_Peak CAR T	1.9203950396453, 2.41101735020097, 1.95747548006106, 1.75592689394106
C1	GSE3982_BASOPHIL_VS_TH2_UP	Patient 1_Preinfusion, Patient 2_Preinfusion, Patient 3_Preinfusion, Patient 4_Peak CAR T	2.61129589260951, 1.87707992219295, 2.72665762318773, 2.06591691725958
C1	GSE3982_BCELL_VS_EFF_MEMORY_CD4_TCELL_DN	Patient 1_Preinfusion, Patient 2_Day 24 CART, Patient 3_Preinfusion, Patient 4_Peak CAR T	1.99471085937443, 1.41099291587891, 2.28463220800852, 2.08617992604497
C1	GSE3982_CENT_MEMORY_CD4_TCELL_VS_TH1_UP	Patient 1_Peak CAR T, Patient 1_Preinfusion, Patient 2_Preinfusion, Patient 4_Peak CAR T	1.64784311822797, 2.21401090418943, 2.01598330679652, 1.89694918851961
C1	GSE3982_CENT_MEMORY_CD4_TCELL_VS_TH2_UP	Patient 1_Preinfusion, Patient 2_Preinfusion, Patient 3_Preinfusion, Patient 4_Peak CAR T	2.53624078358453, 2.85261195900831, 2.28133190383402, 2.10848224448912
C1	GSE3982_DC_VS_EFF_MEMORY_CD4_TCELL_DN	Patient 1_Preinfusion, Patient 2_Preinfusion, Patient 3_Preinfusion, Patient 4_Peak CAR T	2.13536885970418, 2.05757851909144, 2.1237308318883, 2.37623236017478
C1	GSE3982_MAST_CELL_VS_BCELL_DN	Patient 1_Product, Patient 2_Preinfusion, Patient 3_Preinfusion, Patient 4_Peak CAR T	1.92412439093084, 2.73652546463505, 2.00020107187199, 1.88655499031359
C1	GSE3982_MEMORY_CD4_TCELL_VS_BCELL_UP	Patient 1_Preinfusion, Patient 1_Product, Patient 3_Preinfusion, Patient 4_Peak CAR T	1.75933607386644, 2.41052070226886, 2.40343946224904, 2.00127078862555
C1	GSE3982_MEMORY_CD4_TCELL_VS_TH1_UP	Patient 1_Preinfusion, Patient 2_Preinfusion, Patient 3_Preinfusion, Patient 4_Peak CAR T	2.38871612255846, 3.12244275438255, 2.65168175788936, 2.01295714295299
C1	GSE3982_MEMORY_CD4_TCELL_VS_TH2_UP	Patient 1_Preinfusion, Patient 2_Preinfusion, Patient 3_Preinfusion, Patient 4_Peak CAR T	2.68806258915705, 2.4841873127315, 2.52300927354027, 1.92517263241121
C1	GSE40274_XBP1_VS_FOXP3_AND_XBP1_TRANSDUCED_ACTIVATED_CD4_TCELL_UP	Patient 1_Peak CAR T, Patient 1_Preinfusion, Patient 2_Preinfusion, Patient 4_Peak CAR T	2.19116447224863, 2.64409696352674, 1.98986699400286, 1.88731739968431
C1	GSE40277_GATA1_AND_SATB1_TRANSDUCED_VS_CTRL_CD4_TCELL_UP	Patient 1_Preinfusion, Patient 2_Preinfusion, Patient 3_Preinfusion, Patient 4_Peak CAR T	1.98097375075915, 1.82629727469474, 2.53781183980914, 1.76400798469115
C1	GSE40666_NAIVE_VS_EFFECTOR_CD8_TCELL_WITH_IFNA_STIM_90MIN_UP	Patient 1_Peak CAR T, Patient 1_Preinfusion, Patient 3_Preinfusion, Patient 4_Peak CAR T	2.09569918818218, 2.50845256852174, 1.99512260721693, 2.3719987713504
C1	GSE40666_WT_VS_STAT4_KO_CD8_TCELL_WITH_IFNA_STIM_90MIN_DN	Patient 3_Peak, Patient 3_Preinfusion, Patient 4_Peak CAR T, Patient 4_Preinfusion	2.73804271561637, 1.92223354198271, 1.7914059632365, 2.20886317996124
C1	GSE40685_TREG_VS_FOXP3_KO_TREG_PRECURSOR_UP	Patient 1_Peak CAR T, Patient 1_Preinfusion, Patient 2_Day 24 CART, Patient 4_Peak CAR T	1.92406993161336, 2.98425487923526, 1.41099291587891, 1.74455748433764
C1	GSE41867_DAY6_EFFECTOR_VS_DAY30_MEMORY_CD8_TCELL_LCMV_ARMSTRONG_DN	Patient 1_Preinfusion, Patient 2_Preinfusion, Patient 3_Preinfusion, Patient 4_Peak CAR T	2.28346511325552, 2.25866584660361, 2.23946101266286, 2.21849969695206
C1	GSE41867_DAY6_EFFECTOR_VS_DAY30_MEMORY_CD8_TCELL_LCMV_ARMSTRONG_UP	Patient 1_Peak CAR T, Patient 1_Preinfusion, Patient 2_Preinfusion, Patient 4_Peak CAR T	1.88823696105721, 1.84432261308685, 2.98101204996181, 1.82563289115777
C1	GSE42021_TREG_VS_TCONV_PLN_UP	Patient 1_Peak CAR T, Patient 1_Preinfusion, Patient 2_Day 24 CART, Patient 2_Preinfusion	2.14000397652774, 3.44184836080583, 1.41099291587891, 1.78475015700485
C1	GSE43863_DAY6_EFF_VS_DAY150_MEM_LY6C_INT_CXCR5POS_CD4_TCELL_UP	Patient 1_Peak CAR T, Patient 1_Preinfusion, Patient 2_Preinfusion, Patient 4_Peak CAR T	1.96152374709276, 2.94192630234782, 2.6712636532264, 2.69445219413144
C1	GSE43863_NAIVE_VS_MEMORY_TFH_CD4_TCELL_D150_LCMV_UP	Patient 1_Peak CAR T, Patient 1_Preinfusion, Patient 2_Preinfusion, Patient 4_Peak CAR T	2.26357726275187, 2.49125222626472, 2.48277098067802, 1.881649063467
C1	GSE43863_NAIVE_VS_TH1_EFF_CD4_TCELL_D6_LCMV_DN	Patient 1_Peak CAR T, Patient 1_Preinfusion, Patient 3_Preinfusion, Patient 4_Peak CAR T	1.95297412061108, 2.71312700110314, 1.92973815166093, 1.72080624059777
C1	GSE4984_GALECTIN1_VS_VEHICLE_CTRL_TREATED_DC_UP	Patient 1_Preinfusion, Patient 2_Preinfusion, Patient 4_Peak CAR T, Patient 4_Preinfusion	2.49908572976801, 2.98833746045066, 1.81329397056878, 2.04460579595769
C1	GSE4984_UNTREATED_VS_GALECTIN1_TREATED_DC_UP	Patient 1_Preinfusion, Patient 3_Preinfusion, Patient 4_Day 21, Patient 4_Peak CAR T	2.26134901331209, 2.1033286036731, 2.07229810219462, 1.92070191334951
C1	GSE5455_HEALTHY_VS_TUMOR_BEARING_MOUSE_SPLEEN_MONOCYTE_DN	Patient 1_Peak CAR T, Patient 1_Preinfusion, Patient 4_Day 21, Patient 4_Peak CAR T	1.92432420539844, 2.25649217249446, 2.28480285363763, 2.32343224218958
C1	GSE5542_IFNG_VS_IFNA_TREATED_EPITHELIAL_CELLS_6H_DN	Patient 2_Preinfusion, Patient 3_Peak CAR T, Patient 3_Preinfusion, Patient 4_Peak CAR T	1.87126711460439, 2.90402239480316, 1.98468129183914, 1.89809110905062
C1	GSE5542_UNTREATED_VS_IFNA_TREATED_EPITHELIAL_CELLS_24H_UP	Patient 1_Preinfusion, Patient 2_Preinfusion, Patient 3_Preinfusion, Patient 4_Peak CAR T	2.57862015794035, 1.81343985276702, 2.0956467556132, 1.91269858931054
C1	GSE5542_UNTREATED_VS_IFNA_TREATED_EPITHELIAL_CELLS_6H_UP	Patient 1_Preinfusion, Patient 3_Preinfusion, Patient 4_Peak CAR T, Patient 4_Preinfusion	2.8835164385712, 2.48326663249527, 2.52285450765376, 2.04577255112376
C1	GSE557_CIITA_KO_VS_I_AB_KO_DC_UP	Patient 1_Peak CAR T, Patient 1_Preinfusion, Patient 2_Preinfusion, Patient 4_Peak CAR T	1.94712676606376, 2.37915526919989, 1.86117915464739, 2.02957549141597
C1	GSE5679_PPARG_LIGAND_ROSIGLITAZONE_VS_RARA_AGONIST_AM580_TREATED_DC_DN	Patient 1_Peak CAR T, Patient 1_Preinfusion, Patient 2_Preinfusion, Patient 4_Peak CAR T	1.85805150193133, 2.54395298242543, 2.70634980412964, 1.76833132754504
C1	GSE7460_CD8_TCELL_VS_TREG_ACT_UP	Patient 1_Peak CAR T, Patient 1_Preinfusion, Patient 2_Preinfusion, Patient 4_Product	1.87820156002166, 2.20330179414895, 2.29069990157736, 1.99561984732113
C1	GSE7460_CTRL_VS_TGFB_TREATED_ACT_FOXP3_HET_TCONV_DN	Patient 1_Peak CAR T, Patient 1_Preinfusion, Patient 2_Preinfusion, Patient 4_Peak CAR T	2.34944271855102, 2.27842210146609, 3.1636293750003, 2.32840192019415
C1	GSE7509_UNSTIM_VS_IFNA_STIM_IMMATURE_DC_DN	Patient 1_Preinfusion, Patient 1_Product, Patient 2_Preinfusion, Patient 4_Peak CAR T	3.29292063344758, 2.42260941367529, 1.95065189696787, 1.80995960653581
C1	GSE7568_IL4_TGFB_DEXAMETHASONE_VS_IL4_TGFB_TREATED_MACROPHAGE_DN	Patient 1_Peak CAR T, Patient 1_Preinfusion, Patient 2_Preinfusion, Patient 4_Peak CAR T	2.01211104857388, 2.37963380333481, 2.43573501683334, 2.2748408172436
C1	GSE7568_IL4_VS_IL4_AND_DEXAMETHASONE_TREATED_MACROPHAGE_DN	Patient 1_Peak CAR T, Patient 1_Preinfusion, Patient 2_Preinfusion, Patient 4_Peak CAR T	1.88940040050865, 1.89374603128829, 1.903364150202, 1.7662693658415
C1	GSE7852_LN_VS_FAT_TCONV_DN	Patient 1_Preinfusion, Patient 3_Peak, Patient 3_Preinfusion, Patient 4_Peak CAR T	2.57392715151439, 2.14951361287895, 1.90969842960198, 2.54886072588045
C1	GSE8621_UNSTIM_VS_LPS_STIM_MACROPHAGE_DN	Patient 1_Peak CAR T, Patient 1_Preinfusion, Patient 2_Preinfusion, Patient 4_Peak CAR T	1.86726220651946, 2.01503015578824, 1.94930767180003, 1.85096284152597
C1	HALLMARK_COAGULATION	Patient 1_Peak CAR T, Patient 2_Peak2, Patient 3_Preinfusion, Patient 4_Day 21	1.60288224198238, 1.84635561928389, 2.05808878736624, 1.82022291238519
C1	HALLMARK_INTERFERON_ALPHA_RESPONSE	Patient 1_Peak CAR T, Patient 1_Preinfusion, Patient 2_Day 24 CART, Patient 4_Peak CAR T	2.43891838608979, 2.95672659600391, 1.40462407946566, 1.70616582499985
C1	HALLMARK_INTERFERON_GAMMA_RESPONSE	Patient 1_Peak CAR T, Patient 1_Preinfusion, Patient 2_Day 24 CART, Patient 4_Peak CAR T	2.05299062219921, 3.09361093590223, 1.40462407946566, 1.60953581810633
C1	HAY_BONE_MARROW_IMMATURE_NEUTROPHIL	Patient 1_Peak CAR T, Patient 1_Preinfusion, Patient 2_Preinfusion, Patient 4_Peak CAR T	1.863289253921, 2.0209636459297, 2.36420701855894, 1.96701286645182
C1	HOXA9_DN.V1_UP	Patient 1_Preinfusion, Patient 2_Preinfusion, Patient 3_Preinfusion, Patient 4_Peak CAR T	2.4432489131392, 2.32650993372111, 2.13868692022603, 1.91414951492222
C1	HP_ABNORMAL_RETICULOCYTE_MORPHOLOGY	Patient 2_Preinfusion, Patient 3_Preinfusion, Patient 4_Peak, Patient 4_Preinfusion	2.37128473835453, 2.0956550239438, 2.29286101332125, 2.05353804897879
C1	HP_RETICULOCYTOPENIA	Patient 2_Preinfusion, Patient 3_Preinfusion, Patient 4_Peak, Patient 4_Preinfusion	2.45858758418787, 2.14296493733034, 2.62645881929865, 2.05353804897879
C1	HU_FETAL_RETINA_BLOOD	Patient 2_Peak2, Patient 3_Peak, Patient 3_Peak CAR T, Patient 4_Peak	2.13745556181479, 1.9382275653182, 1.86993337350012, 2.07015333291865
C1	HU_FETAL_RETINA_FIBROBLAST	Patient 1_Preinfusion, Patient 3_Peak, Patient 3_Peak CAR T, Patient 4_Peak CAR T	2.95828654689402, 1.77660689488687, 1.80327880037037, 2.5759548596475
C1	KEGG_RIBOSOME	Patient 1_Day 7, Patient 2_Preinfusion, Patient 3_Peak CAR T, Patient 4_Peak	2.80033784306124, 4.44109314183426, 2.05686978373453, 3.69807564758616
C1	KEGG_TOLL_LIKE_RECEPTOR_SIGNALING_PATHWAY	Patient 1_Preinfusion, Patient 1_Product, Patient 3_Product, Patient 4_Peak CAR T	2.34892265174948, 1.88892817654561, 1.84151146488874, 1.76158101367078
C1	KRAS.600_UP.V1_DN	Patient 1_Peak CAR T, Patient 1_Preinfusion, Patient 2_Preinfusion, Patient 3_Peak	2.07379285558409, 2.33993073818604, 2.04121201651261, 1.98911976662185
C1	LAKE_ADULT_KIDNEY_C19_COLLECTING_DUCT_INTERCALATED_CELLS_TYPE_A_MEDULLA	Patient 2_Peak2, Patient 2_Preinfusion, Patient 3_Peak CAR T, Patient 4_Peak	1.86172486956981, 2.42759672233618, 2.4864117760524, 2.75669644068018
C1	LAKE_ADULT_KIDNEY_C26_MESANGIAL_CELLS	Patient 1_Preinfusion, Patient 2_Day 24 CART, Patient 2_Preinfusion, Patient 4_Peak CAR T	2.18136664310995, 1.40866206406642, 1.87290210524457, 2.24094689131715
C1	MENON_FETAL_KIDNEY_4_PODOCYTES	Patient 1_Preinfusion, Patient 2_Preinfusion, Patient 3_Preinfusion, Patient 4_Peak CAR T	1.66384544419847, 1.70967959437731, 1.84069943511613, 2.3017912647118
C1	MODULE_107	Patient 1_Preinfusion, Patient 1_Product, Patient 3_Peak CAR T, Patient 4_Peak CAR T	2.16721300757525, 2.05885651702284, 2.61742475353078, 1.80712048472304
C1	MODULE_109	Patient 1_Preinfusion, Patient 3_Peak CAR T, Patient 3_Preinfusion, Patient 4_Peak CAR T	1.89245053372891, 2.18300147973969, 2.05505875541996, 1.70592316026938
C1	MODULE_12	Patient 1_Product, Patient 2_Preinfusion, Patient 3_Peak CAR T, Patient 4_Peak CAR T	1.77329629544912, 1.81733660029509, 1.81703779616851, 2.04870183254813
C1	MODULE_122	Patient 1_Preinfusion, Patient 1_Product, Patient 2_Preinfusion, Patient 4_Peak CAR T	1.7450894917893, 1.87338394015749, 1.91335662323806, 2.40149128663489
C1	MODULE_213	Patient 1_Preinfusion, Patient 2_Preinfusion, Patient 3_Preinfusion, Patient 4_Peak CAR T	2.23666472959395, 2.08678819639379, 2.02853833723069, 2.10283179600053
C1	MODULE_223	Patient 1_Preinfusion, Patient 2_Preinfusion, Patient 3_Peak CAR T, Patient 4_Peak CAR T	2.4221240777791, 2.54039742381464, 2.63127734058931, 2.27078964681715
C1	MODULE_29	Patient 2_Preinfusion, Patient 3_Peak CAR T, Patient 4_Peak, Patient 4_Preinfusion	3.04531700107194, 1.84362338987672, 2.90961874857253, 1.60433967837154
C1	MODULE_361	Patient 1_Peak CAR T, Patient 1_Preinfusion, Patient 2_Preinfusion, Patient 4_Peak CAR T	2.03092026370205, 2.14911604790209, 2.5645159291107, 1.97465996275232
C1	MODULE_55	Patient 1_Preinfusion, Patient 1_Product, Patient 3_Peak CAR T, Patient 4_Peak CAR T	1.61778462673996, 1.85654651150251, 1.80967761968216, 1.61150264936474
C1	MODULE_6	Patient 1_Peak CAR T, Patient 1_Preinfusion, Patient 3_Peak CAR T, Patient 4_Peak CAR T	1.84577920059594, 1.95287664456306, 2.05298653327986, 2.58169488656084
C1	MODULE_63	Patient 1_Preinfusion, Patient 1_Product, Patient 2_Preinfusion, Patient 4_Peak CAR T	1.72336923291243, 1.87973602142025, 2.3155528578854, 1.78717720481137
C1	MORF_IL4	Patient 2_Preinfusion, Patient 3_Preinfusion, Patient 4_Peak CAR T, Patient 4_Preinfusion	1.77192628147397, 1.70389404501839, 1.7201640177355, 1.91968084756513
C1	MTOR_UP.N4.V1_DN	Patient 1_Peak CAR T, Patient 1_Preinfusion, Patient 2_Preinfusion, Patient 4_Peak CAR T	2.77143853015771, 1.82075595564413, 2.69302339388214, 1.9690860074386
C1	RAF_UP.V1_DN	Patient 1_Peak CAR T, Patient 1_Preinfusion, Patient 2_Preinfusion, Patient 4_Peak CAR T	2.0291241315313, 1.93054846701817, 2.05433400660392, 2.39769283390262
C1	REACTOME_ALPHA_PROTEIN_KINASE_1_SIGNALING_PATHWAY	Patient 1_Preinfusion, Patient 2_Preinfusion, Patient 3_Preinfusion, Patient 4_Peak	1.65284959488822, 1.63669788944762, 1.66642681824967, 1.77746301770767
C1	REACTOME_AMYLOID_FIBER_FORMATION	Patient 1_Peak CAR T, Patient 2_Preinfusion, Patient 3_Peak, Patient 3_Preinfusion	2.15042731147451, 2.09328416062047, 2.00899395406229, 1.96828550862808
C1	REACTOME_ANTIGEN_PRESENTATION_FOLDING_ASSEMBLY_AND_PEPTIDE_LOADING_OF_CLASS_I_MHC	Patient 1_Preinfusion, Patient 2_Day 24 CART, Patient 2_Preinfusion, Patient 3_Preinfusion	2.52819022963168, 1.39753275749306, 2.29195420292988, 2.10622638667592
C1	REACTOME_DAP12_INTERACTIONS	Patient 1_Preinfusion, Patient 2_Day 24 CART, Patient 3_Preinfusion, Patient 4_Peak CAR T	2.11280004298828, 1.39753275749306, 2.47826802740907, 2.28963861242532
C1	REACTOME_DAP12_SIGNALING	Patient 1_Preinfusion, Patient 2_Day 24 CART, Patient 3_Preinfusion, Patient 4_Peak CAR T	1.89408264022035, 1.39753275749306, 2.12609117038113, 2.03298756560581
C1	REACTOME_DOWNREGULATION_OF_ERBB4_SIGNALING	Patient 1_Preinfusion, Patient 2_Preinfusion, Patient 3_Preinfusion, Patient 4_Peak	1.65284959488822, 1.63669788944762, 1.66642681824967, 1.77746301770767
C1	REACTOME_FLT3_SIGNALING_BY_CBL_MUTANTS	Patient 1_Preinfusion, Patient 2_Preinfusion, Patient 3_Preinfusion, Patient 4_Peak	1.65284959488822, 1.63669788944762, 1.66642681824967, 1.77746301770767
C1	REACTOME_GLYCOGEN_STORAGE_DISEASES	Patient 1_Preinfusion, Patient 2_Preinfusion, Patient 3_Preinfusion, Patient 4_Peak	1.65284959488822, 1.63669788944762, 1.66642681824967, 1.77746301770767
C1	REACTOME_INLA_MEDIATED_ENTRY_OF_LISTERIA_MONOCYTOGENES_INTO_HOST_CELLS	Patient 1_Preinfusion, Patient 2_Preinfusion, Patient 3_Preinfusion, Patient 4_Peak	1.65284959488822, 1.63669788944762, 1.66642681824967, 1.77746301770767
C1	REACTOME_IRAK2_MEDIATED_ACTIVATION_OF_TAK1_COMPLEX	Patient 1_Preinfusion, Patient 2_Preinfusion, Patient 3_Preinfusion, Patient 4_Peak	1.65284959488822, 1.63669788944762, 1.66642681824967, 1.77746301770767
C1	REACTOME_MYOCLONIC_EPILEPSY_OF_LAFORA	Patient 1_Preinfusion, Patient 2_Preinfusion, Patient 3_Preinfusion, Patient 4_Peak	1.65284959488822, 1.63669788944762, 1.66642681824967, 1.77746301770767
C1	REACTOME_P75NTR_RECRUITS_SIGNALLING_COMPLEXES	Patient 1_Preinfusion, Patient 2_Preinfusion, Patient 3_Preinfusion, Patient 4_Peak	1.65284959488822, 1.63669788944762, 1.93416377079602, 1.77746301770767
C1	REACTOME_PEXOPHAGY	Patient 1_Preinfusion, Patient 2_Preinfusion, Patient 3_Preinfusion, Patient 4_Peak	1.70922153856725, 1.95501342363772, 2.17270270488056, 1.77746301770767
C1	REACTOME_REGULATION_OF_INNATE_IMMUNE_RESPONSES_TO_CYTOSOLIC_DNA	Patient 1_Preinfusion, Patient 2_Preinfusion, Patient 3_Preinfusion, Patient 4_Peak	1.80824182821607, 2.09355250190634, 1.66642681824967, 1.77746301770767
C1	REACTOME_TICAM1_DEPENDENT_ACTIVATION_OF_IRF3_IRF7	Patient 1_Preinfusion, Patient 2_Preinfusion, Patient 3_Preinfusion, Patient 4_Peak	1.91775732804674, 1.85913357869855, 1.66642681824967, 1.77746301770767
C1	REACTOME_TICAM1_TRAF6_DEPENDENT_INDUCTION_OF_TAK1_COMPLEX	Patient 1_Preinfusion, Patient 2_Preinfusion, Patient 3_Preinfusion, Patient 4_Peak	1.65284959488822, 1.63669788944762, 1.66642681824967, 1.77746301770767
C1	REACTOME_TRAF6_MEDIATED_INDUCTION_OF_TAK1_COMPLEX_WITHIN_TLR4_COMPLEX	Patient 1_Preinfusion, Patient 2_Preinfusion, Patient 3_Preinfusion, Patient 4_Peak	1.65284959488822, 1.63669788944762, 1.66642681824967, 1.77746301770767
C1	REACTOME_TRAF6_MEDIATED_IRF7_ACTIVATION_IN_TLR7_8_OR_9_SIGNALING	Patient 1_Preinfusion, Patient 2_Preinfusion, Patient 3_Preinfusion, Patient 4_Peak	1.85414370262918, 1.63669788944762, 1.66642681824967, 1.77746301770767
C1	RUBENSTEIN_SKELETAL_MUSCLE_B_CELLS	Patient 2_Preinfusion, Patient 3_Peak CAR T, Patient 4_Peak, Patient 4_Peak CAR T	4.74101888449974, 2.47337392532694, 2.92920705135541, 1.53359055295742
C1	SOBOLEV_PBMC_PANDEMRIX_AGE_18_64YO_CORRELATED_WITH_AGE_1DY_POSITIVE	Patient 1_Peak CAR T, Patient 1_Preinfusion, Patient 2_Preinfusion, Patient 4_Peak CAR T	1.75487663731564, 2.18609061147005, 1.81611007995552, 2.1597209325439
C1	Tcell.exhaustion..ZhangCell2017.	Patient 1_Preinfusion, Patient 1_Product, Patient 2_Peak, Patient 4_Product	2.03309961982404, 1.91570920798653, 1.65499028415002, 1.64165124554172
C1	Tfh	Patient 1_Peak CAR T, Patient 1_Preinfusion, Patient 1_Product, Patient 3_Preinfusion	1.79403772402621, 1.61966183621986, 1.8190430898877, 2.11866156625747
C1	TRAVAGLINI_LUNG_CAPILLARY_INTERMEDIATE_2_CELL	Patient 2_Peak2, Patient 3_Peak, Patient 3_Peak CAR T, Patient 4_Peak	2.16229920455446, 2.29260158391959, 2.44022361231825, 3.57511119802132
C1	TRAVAGLINI_LUNG_CLASSICAL_MONOCYTE_CELL	Patient 1_Peak CAR T, Patient 1_Preinfusion, Patient 2_Preinfusion, Patient 4_Peak CAR T	2.16052183174735, 2.37790839370773, 1.99025605041961, 2.0140758284541
C1	TRAVAGLINI_LUNG_NEUTROPHIL_CELL	Patient 1_Peak CAR T, Patient 1_Preinfusion, Patient 1_Product, Patient 4_Peak CAR T	1.88259486593526, 2.62427686874412, 1.78338586511471, 2.4325248982784
C1	ZHONG_PFC_C3_HOPX_POS_OPC	Patient 1_Peak CAR T, Patient 3_Peak CAR T, Patient 4_Peak, Patient 4_Peak CAR T	1.3182433234515, 1.32376727067, 1.34081356662854, 1.47634867799865
C1	ZHONG_PFC_C6_DLX5_GAD1_GAD2_POS_INTERNEURON	Patient 1_Peak CAR T, Patient 1_Preinfusion, Patient 2_Preinfusion, Patient 4_Peak CAR T	1.32022862966152, 1.32219943083249, 1.32107864463396, 1.31706721531999
C1	BIOCARTA_D4GDI_PATHWAY	Patient 1_Product, Patient 2_Peak, Patient 4_Peak CAR T	1.75431141843539, 1.64596217567162, 1.82686186585349
C1	BIOCARTA_IL12_PATHWAY	Patient 3_Preinfusion, Patient 4_Peak CAR T, Patient 4_Preinfusion	1.98565088051401, 2.14172453516458, 1.83747216106824
C1	BMI1_DN_MEL18_DN.V1_DN	Patient 1_Peak CAR T, Patient 1_Preinfusion, Patient 4_Peak CAR T	1.74479966088165, 2.34341338189548, 1.97719321926068
C1	BUSSLINGER_GASTRIC_G_CELLS	Patient 1_Preinfusion, Patient 3_Preinfusion, Patient 4_Peak CAR T	2.04830919252063, 1.92270181518463, 1.65777771283125
C1	BUSSLINGER_GASTRIC_LYZ_POSITIVE_CELLS	Patient 2_Preinfusion, Patient 3_Peak CAR T, Patient 4_Peak	4.00773746684225, 2.3571081140769, 2.84165325172941
C1	BUSSLINGER_GASTRIC_OXYNTIC_ENTEROCHROMAFFIN_LIKE_CELLS	Patient 1_Preinfusion, Patient 2_Preinfusion, Patient 4_Peak CAR T	1.74475205067968, 1.71494794546425, 1.78205420774552
C1	CD4.EM	Patient 1_Preinfusion, Patient 2_Preinfusion, Patient 4_Peak CAR T	2.26478425121628, 2.15814035226379, 2.45796676992529
C1	CD4_Th2	Patient 1_Preinfusion, Patient 2_Preinfusion, Patient 4_Peak CAR T	1.61555041266967, 1.66647422531294, 1.72012045981854
C1	CRX_DN.V1_UP	Patient 1_Peak CAR T, Patient 1_Preinfusion, Patient 3_Preinfusion	1.8903865267661, 2.10885904073648, 1.91268462987735
C1	CUI_DEVELOPING_HEART_LEFT_VENTRICULAR_CARDIOMYOCYTE	Patient 1_Preinfusion, Patient 3_Peak CAR T, Patient 3_Preinfusion	1.32360080807767, 2.21530923412369, 1.56946052369155
C1	CUI_DEVELOPING_HEART_VASCULAR_ENDOTHELIAL_CELL	Patient 1_Preinfusion, Patient 2_Preinfusion, Patient 4_Peak CAR T	2.39538221644089, 1.9042014754789, 2.84616488335752
C1	DESCARTES_FETAL_ADRENAL_MYELOID_CELLS	Patient 1_Preinfusion, Patient 3_Peak, Patient 3_Preinfusion	2.09628142484917, 1.83069621198071, 1.73498450777313
C1	DESCARTES_FETAL_CEREBRUM_VASCULAR_ENDOTHELIAL_CELLS	Patient 1_Preinfusion, Patient 3_Peak CAR T, Patient 4_Peak CAR T	2.26328076643689, 1.75712479362882, 2.10226058431868
C1	DESCARTES_MAIN_FETAL_IGFBP1_DKK1_POSITIVE_CELLS	Patient 1_Peak CAR T, Patient 1_Preinfusion, Patient 3_Peak CAR T	2.10048218877325, 1.82318272231055, 1.7455489230282
C1	DURANTE_ADULT_OLFACTORY_NEUROEPITHELIUM_MACROPHAGES	Patient 1_Product, Patient 3_Peak CAR T, Patient 4_Peak CAR T	1.69281714738487, 2.27393778441458, 1.94566144469965
C1	DURANTE_ADULT_OLFACTORY_NEUROEPITHELIUM_MAST_CELLS	Patient 1_Preinfusion, Patient 2_Preinfusion, Patient 4_Peak CAR T	1.89370387089968, 1.80377411720038, 2.27605916338392
C1	DURANTE_ADULT_OLFACTORY_NEUROEPITHELIUM_RESPIRATORY_SECRETORY_CELLS	Patient 1_Preinfusion, Patient 3_Peak CAR T, Patient 4_Peak CAR T	1.32360080807767, 1.32620514777989, 1.61732225147545
C1	Exhausted._TOO.LONG.	Patient 1_Preinfusion, Patient 2_Preinfusion, Patient 4_Peak CAR T	2.02478021048472, 1.62803340121579, 1.65535265837231
C1	Exhaustion	Patient 1_Preinfusion, Patient 1_Product, Patient 3_Product	1.57208491495818, 1.59753286986963, 1.67679516582484
C1	FAN_EMBRYONIC_CTX_BRAIN_ENDOTHELIAL_1	Patient 1_Preinfusion, Patient 3_Peak CAR T, Patient 4_Peak CAR T	1.83042312162842, 1.87093786628428, 1.94237277295871
C1	FAN_EMBRYONIC_CTX_MICROGLIA_3	Patient 1_Preinfusion, Patient 1_Product, Patient 4_Peak CAR T	1.6611410034937, 1.56324505352313, 1.6291174646324
C1	FAN_OVARY_CL18_B_LYMPHOCYTE	Patient 1_Peak CAR T, Patient 3_Peak, Patient 4_Peak CAR T	1.51444636025364, 1.61906143590127, 1.59112527102411
C1	FULLER_PBMC_F_TULARENSIS_VACCINE_LVS_AGE_22_54YO_18HR_DN	Patient 2_Day 24 CART, Patient 2_Preinfusion, Patient 3_Preinfusion	1.41896559664717, 1.87754040626229, 1.59275374830778
C1	GAUCHER_PBMC_YF_VAX_STAMARIL_UNKNOWN_AGE_7DY_UP	Patient 1_Preinfusion, Patient 1_Product, Patient 4_Product	3.00443061817058, 1.9465889956375, 1.87970380697646
C1	GNF2_GLTSCR2	Patient 2_Preinfusion, Patient 3_Preinfusion, Patient 4_Peak	3.18215459639199, 1.74442768975114, 2.86848255914112
C1	GNF2_MYD88	Patient 1_Preinfusion, Patient 2_Peak2, Patient 2_Preinfusion	2.64442969791164, 2.19252492701487, 1.96816009561628
C1	GNF2_S100A4	Patient 1_Product, Patient 2_Preinfusion, Patient 4_Product	1.70808405163436, 1.74166951026284, 1.61730712342466
C1	GNF2_TNFRSF1B	Patient 1_Product, Patient 3_Peak CAR T, Patient 4_Product	1.81469050307055, 2.18194407211181, 1.61730712342466
C1	GOBP_ADAPTIVE_IMMUNE_RESPONSE_BASED_ON_SOMATIC_RECOMBINATION_OF_IMMUNE_RECEPTORS_BUILT_FROM_IMMUNOGLOBULIN_SUPERFAMILY_DOMAINS	Patient 1_Peak CAR T, Patient 1_Preinfusion, Patient 2_Day 24 CART	2.37187001518823, 2.179016376296, 1.40441200862498
C1	GOBP_ANTIGEN_PROCESSING_AND_PRESENTATION_OF_ENDOGENOUS_PEPTIDE_ANTIGEN	Patient 1_Preinfusion, Patient 2_Day 24 CART, Patient 3_Preinfusion	2.5686749807847, 1.40441200862498, 2.04614908539341
C1	GOBP_CELL_ACTIVATION	Patient 1_Preinfusion, Patient 1_Product, Patient 4_Peak CAR T	2.3259455198851, 1.9792281827061, 1.95478808404368
C1	GOBP_CELL_MIGRATION	Patient 1_Preinfusion, Patient 4_Peak CAR T, Patient 4_Preinfusion	2.42109618027334, 1.92412119699447, 2.15148171818365
C1	GOBP_COTRANSLATIONAL_PROTEIN_TARGETING_TO_MEMBRANE	Patient 1_Day 7, Patient 2_Preinfusion, Patient 4_Peak	2.927526177413, 4.22075352923463, 3.6157230756635
C1	GOBP_GRANZYME_MEDIATED_PROGRAMMED_CELL_DEATH_SIGNALING_PATHWAY	Patient 3_Peak CAR T, Patient 4_Peak, Patient 4_Peak CAR T	2.00232149226616, 1.33522087905868, 1.76055526440487
C1	GOBP_IMMUNE_EFFECTOR_PROCESS	Patient 1_Preinfusion, Patient 4_Peak CAR T, Patient 4_Preinfusion	2.18167897159964, 1.79210527316225, 2.03415046797378
C1	GOBP_INFLAMMATORY_RESPONSE	Patient 1_Preinfusion, Patient 2_Preinfusion, Patient 4_Peak CAR T	2.33784455459967, 1.93454372791317, 1.98471614266953
C1	GOBP_LEUKOCYTE_MEDIATED_CYTOTOXICITY	Patient 1_Preinfusion, Patient 2_Day 24 CART, Patient 4_Peak CAR T	2.41467783663975, 1.40441200862498, 2.12466545991373
C1	GOBP_LEUKOCYTE_MIGRATION	Patient 1_Preinfusion, Patient 1_Product, Patient 4_Peak CAR T	2.01291453602263, 2.07588264888358, 1.95304685264642
C1	GOBP_LIPOPOLYSACCHARIDE_MEDIATED_SIGNALING_PATHWAY	Patient 1_Preinfusion, Patient 1_Product, Patient 4_Peak CAR T	1.97280178133244, 1.66819359271511, 1.98112047156782
C1	GOBP_LYMPHOCYTE_CHEMOTAXIS	Patient 1_Preinfusion, Patient 1_Product, Patient 3_Product	1.87453006085174, 2.05215960337631, 1.83298913558341
C1	GOBP_NEGATIVE_REGULATION_OF_IMMUNE_EFFECTOR_PROCESS	Patient 1_Preinfusion, Patient 4_Peak CAR T, Patient 4_Preinfusion	2.23255785539961, 2.01115595176366, 2.12719228718772
C1	GOBP_NEGATIVE_REGULATION_OF_IMMUNE_SYSTEM_PROCESS	Patient 1_Preinfusion, Patient 4_Peak CAR T, Patient 4_Preinfusion	2.21144123151641, 2.12879482320973, 2.15191115857026
C1	GOBP_NEGATIVE_REGULATION_OF_NATURAL_KILLER_CELL_MEDIATED_IMMUNITY	Patient 1_Preinfusion, Patient 3_Preinfusion, Patient 4_Peak CAR T	2.24416358009559, 2.12077778324268, 1.78891963467102
C1	GOBP_NEGATIVE_REGULATION_OF_RESPONSE_TO_BIOTIC_STIMULUS	Patient 1_Preinfusion, Patient 4_Peak CAR T, Patient 4_Preinfusion	2.08646700390958, 2.01154554671045, 2.43036579227255
C1	GOBP_NEGATIVE_REGULATION_OF_VIRAL_ENTRY_INTO_HOST_CELL	Patient 1_Day 7, Patient 1_Preinfusion, Patient 4_Peak CAR T	1.96836955208682, 1.98101284989024, 1.98988290488347
C1	GOBP_POSITIVE_REGULATION_OF_CALCIUM_ION_TRANSPORT	Patient 1_Preinfusion, Patient 1_Product, Patient 4_Preinfusion	2.20844874117584, 2.15285192511097, 2.24027110231119
C1	GOBP_POSITIVE_REGULATION_OF_CELL_ACTIVATION	Patient 1_Preinfusion, Patient 1_Product, Patient 4_Peak CAR T	2.56702572233528, 2.05247326644314, 1.84824966252285
C1	GOBP_POSITIVE_REGULATION_OF_CYTOKINE_PRODUCTION_INVOLVED_IN_IMMUNE_RESPONSE	Patient 1_Preinfusion, Patient 2_Day 24 CART, Patient 2_Preinfusion	2.20320357769468, 1.40441200862498, 2.09538957155112
C1	GOBP_POSITIVE_REGULATION_OF_IMMUNE_RESPONSE	Patient 1_Preinfusion, Patient 2_Day 24 CART, Patient 3_Preinfusion	1.82278208367917, 1.81397836099015, 1.88388610245948
C1	GOBP_POSITIVE_REGULATION_OF_LYMPHOCYTE_MIGRATION	Patient 1_Preinfusion, Patient 1_Product, Patient 3_Product	1.95524458658872, 2.05215960337631, 1.83298913558341
C1	GOBP_POSITIVE_REGULATION_OF_PHOSPHATIDYLINOSITOL_3_KINASE_SIGNALING	Patient 1_Preinfusion, Patient 3_Preinfusion, Patient 4_Preinfusion	1.9447318803439, 2.05714319231663, 2.08942273866518
C1	GOBP_REGULATION_OF_CELL_KILLING	Patient 1_Preinfusion, Patient 2_Day 24 CART, Patient 4_Peak CAR T	2.44447870230029, 1.40441200862498, 1.99285210215054
C1	GOBP_REGULATION_OF_CELLULAR_COMPONENT_MOVEMENT	Patient 1_Preinfusion, Patient 4_Peak CAR T, Patient 4_Preinfusion	2.22089398425344, 1.73318863703902, 2.02456417815344
C1	GOBP_REGULATION_OF_LEUKOCYTE_MEDIATED_CYTOTOXICITY	Patient 1_Preinfusion, Patient 2_Day 24 CART, Patient 4_Peak CAR T	2.62626147707358, 1.40441200862498, 1.93921187459017
C1	GOBP_REGULATION_OF_LIPASE_ACTIVITY	Patient 3_Peak, Patient 3_Peak CAR T, Patient 3_Preinfusion	1.68393451984436, 1.72273954740348, 2.0908682120862
C1	GOBP_REGULATION_OF_LYMPHOCYTE_MIGRATION	Patient 1_Preinfusion, Patient 1_Product, Patient 3_Product	2.20249862301875, 2.01740567458373, 1.83298913558341
C1	GOBP_REGULATION_OF_T_CELL_MEDIATED_CYTOTOXICITY	Patient 1_Preinfusion, Patient 2_Day 24 CART, Patient 4_Peak CAR T	2.5686749807847, 1.40441200862498, 1.93909362206935
C1	GOBP_RESPONSE_TO_BACTERIUM	Patient 1_Preinfusion, Patient 2_Day 24 CART, Patient 2_Preinfusion	2.09614068973283, 1.40441200862498, 1.92237463830825
C1	GOBP_RESPONSE_TO_INTERFERON_GAMMA	Patient 1_Preinfusion, Patient 2_Day 24 CART, Patient 4_Preinfusion	2.92851277892323, 1.40441200862498, 2.24446663083102
C1	GOBP_T_CELL_MEDIATED_IMMUNITY	Patient 1_Preinfusion, Patient 2_Day 24 CART, Patient 4_Peak CAR T	2.188246276901, 1.40441200862498, 2.37412175835544
C1	GOBP_T_CELL_PROLIFERATION	Patient 1_Preinfusion, Patient 2_Preinfusion, Patient 3_Preinfusion	2.44752574460804, 2.5006937686457, 2.26675902164238
C1	GOCC_ENDOPLASMIC_RETICULUM_LUMEN	Patient 2_Day 24 CART, Patient 2_Day 24 CART, Patient 2_Peak2	1.41652337300006, 1.40441200862498, 2.03805798249433
C1	GOCC_FILOPODIUM	Patient 1_Preinfusion, Patient 1_Preinfusion, Patient 3_Preinfusion	2.31775909552519, 2.29939878674522, 2.05064558617491
C1	GOCC_GOLGI_APPARATUS_SUBCOMPARTMENT	Patient 1_Preinfusion, Patient 1_Preinfusion, Patient 4_Peak CAR T	2.20275659837012, 2.18902932178546, 1.55775280939697
C1	GOCC_LUMENAL_SIDE_OF_MEMBRANE	Patient 1_Preinfusion, Patient 1_Preinfusion, Patient 3_Preinfusion	2.25205705027344, 2.21169921221262, 2.06035900653574
C1	GOCC_RIBOSOMAL_SUBUNIT	Patient 2_Preinfusion, Patient 4_Peak, Patient 4_Peak	3.22751693777627, 3.28610002816721, 3.23311457370176
C1	GOCC_RIBOSOME	Patient 2_Preinfusion, Patient 4_Peak, Patient 4_Peak	2.84865694290329, 3.07283345086429, 3.02275057959907
C1	GOLDRATH_EFF_VS_MEMORY_CD8_TCELL_DN	Patient 1_Peak CAR T, Patient 2_Preinfusion, Patient 4_Peak CAR T	2.54881489131532, 2.40889852769367, 1.86777180439958
C1	GOMF_ACTIN_MONOMER_BINDING	Patient 1_Day 7, Patient 1_Day 7, Patient 4_Peak	1.96347006026476, 1.94280631115063, 1.82903259354553
C1	GOMF_IDENTICAL_PROTEIN_BINDING	Patient 1_Product, Patient 1_Product, Patient 2_Day 24 CART	2.07100230220497, 2.06125434285103, 1.81013718638751
C1	GOMF_MHC_CLASS_I_PROTEIN_COMPLEX_BINDING	Patient 4_Peak CAR T, Patient 4_Peak CAR T, Patient 4_Preinfusion	1.65346837851285, 1.6515501159658, 1.65862988531364
C1	GOMF_PROTEIN_ANTIGEN_BINDING	Patient 1_Preinfusion, Patient 4_Peak CAR T, Patient 4_Peak CAR T	1.61682662775708, 1.33305981999442, 1.33133466490003
C1	GOMF_PROTEIN_KINASE_ACTIVITY	Patient 1_Preinfusion, Patient 3_Preinfusion, Patient 3_Preinfusion	1.79643846208045, 2.0987997357984, 2.06079104662116
C1	GOMF_RRNA_BINDING	Patient 2_Preinfusion, Patient 2_Preinfusion, Patient 4_Peak	2.59957194371108, 2.52354612715362, 2.04319885053873
C1	GSE10239_NAIVE_VS_KLRG1HIGH_EFF_CD8_TCELL_UP	Patient 2_Preinfusion, Patient 3_Preinfusion, Patient 4_Peak CAR T	3.50217636674068, 2.0126348159544, 2.06080006817283
C1	GSE10240_CTRL_VS_IL22_STIM_PRIMARY_BRONCHIAL_EPITHELIAL_CELLS_UP	Patient 1_Preinfusion, Patient 2_Preinfusion, Patient 4_Peak CAR T	1.96530493994748, 2.06554327811882, 1.84386154817743
C1	GSE10240_IL22_VS_IL22_AND_IL17_STIM_PRIMARY_BRONCHIAL_EPITHELIAL_CELLS_UP	Patient 1_Preinfusion, Patient 2_Preinfusion, Patient 4_Peak CAR T	2.27406851265711, 2.54569258789663, 1.97870773392558
C1	GSE10273_HIGH_VS_LOW_IL7_TREATED_IRF4_8_NULL_PRE_BCELL_DN	Patient 1_Preinfusion, Patient 2_Preinfusion, Patient 4_Peak CAR T	1.78889272989054, 2.50913386610238, 2.12148282110672
C1	GSE11057_CD4_CENT_MEM_VS_PBMC_DN	Patient 1_Preinfusion, Patient 3_Preinfusion, Patient 4_Peak CAR T	1.98784653064, 2.48265224234156, 1.68629108594371
C1	GSE11057_NAIVE_VS_CENT_MEMORY_CD4_TCELL_DN	Patient 1_Preinfusion, Patient 1_Product, Patient 4_Peak CAR T	2.13022794019323, 2.35000830632944, 2.03571551464595
C1	GSE11961_MARGINAL_ZONE_BCELL_VS_MEMORY_BCELL_DAY40_UP	Patient 2_Preinfusion, Patient 3_Preinfusion, Patient 4_Peak CAR T	2.13361377309408, 1.98206302388851, 1.79531481891477
C1	GSE12392_WT_VS_IFNAR_KO_CD8A_NEG_SPLEEN_DC_UP	Patient 1_Peak CAR T, Patient 1_Preinfusion, Patient 2_Preinfusion	2.40628853390155, 2.28118363266221, 1.83188546261132
C1	GSE12392_WT_VS_IFNB_KO_CD8A_NEG_SPLEEN_DC_DN	Patient 1_Preinfusion, Patient 2_Preinfusion, Patient 4_Peak CAR T	2.18379067811007, 1.96535455912342, 1.76697023370099
C1	GSE12845_IGD_POS_BLOOD_VS_DARKZONE_GC_TONSIL_BCELL_UP	Patient 1_Preinfusion, Patient 2_Day 24 CART, Patient 2_Preinfusion	2.03674864056335, 1.41099291587891, 2.5624643472363
C1	GSE12845_NAIVE_VS_DARKZONE_GC_TONSIL_BCELL_UP	Patient 1_Preinfusion, Patient 2_Preinfusion, Patient 4_Peak CAR T	2.37015196549121, 1.71353622863796, 1.89337339508529
C1	GSE12845_NAIVE_VS_PRE_GC_TONSIL_BCELL_UP	Patient 1_Preinfusion, Patient 2_Preinfusion, Patient 4_Peak CAR T	1.74847915648939, 2.94772250539278, 1.71729212559489
C1	GSE12845_PRE_GC_VS_DARKZONE_GC_TONSIL_BCELL_UP	Patient 1_Preinfusion, Patient 2_Preinfusion, Patient 4_Peak CAR T	2.52815938203435, 2.39643476204643, 2.46366045175873
C1	GSE13411_NAIVE_VS_IGM_MEMORY_BCELL_UP	Patient 1_Preinfusion, Patient 2_Preinfusion, Patient 4_Peak CAR T	1.80699968571976, 1.81610958710388, 1.66292234420974
C1	GSE13411_PLASMA_CELL_VS_MEMORY_BCELL_DN	Patient 1_Peak CAR T, Patient 1_Preinfusion, Patient 2_Preinfusion	2.27734391704401, 2.24747992021626, 2.86203182705995
C1	GSE13522_CTRL_VS_T_CRUZI_Y_STRAIN_INF_SKIN_IFNAR_KO_UP	Patient 1_Peak CAR T, Patient 1_Preinfusion, Patient 4_Peak CAR T	2.0562048401869, 1.74933751793783, 1.71418543450468
C1	GSE13547_CTRL_VS_ANTI_IGM_STIM_ZFX_KO_BCELL_12H_UP	Patient 2_Preinfusion, Patient 4_Peak CAR T, Patient 4_Preinfusion	1.82655817673732, 2.24636685178046, 2.04316092478996
C1	GSE13547_WT_VS_ZFX_KO_BCELL_ANTI_IGM_STIM_12H_DN	Patient 1_Peak CAR T, Patient 2_Preinfusion, Patient 4_Peak CAR T	2.13914097499844, 2.94734584542022, 1.89885022043098
C1	GSE13547_WT_VS_ZFX_KO_BCELL_UP	Patient 1_Preinfusion, Patient 1_Product, Patient 4_Peak CAR T	1.93498493719009, 2.15448222999721, 2.22061698265991
C1	GSE13738_TCR_VS_BYSTANDER_ACTIVATED_CD4_TCELL_DN	Patient 1_Preinfusion, Patient 2_Preinfusion, Patient 4_Peak CAR T	2.14742481805944, 2.01870188150402, 2.10108869541544
C1	GSE14000_UNSTIM_VS_16H_LPS_DC_TRANSLATED_RNA_DN	Patient 1_Preinfusion, Patient 1_Product, Patient 4_Peak CAR T	2.60432982415918, 1.91030554288863, 1.91931393177127
C1	GSE14308_INDUCED_VS_NATURAL_TREG_DN	Patient 2_Preinfusion, Patient 3_Preinfusion, Patient 4_Peak CAR T	2.23523788960036, 2.0335936908337, 1.66339680484377
C1	GSE14350_IL2RB_KO_VS_WT_TREG_DN	Patient 1_Preinfusion, Patient 3_Peak, Patient 4_Peak CAR T	1.93297411311958, 2.34877266877342, 1.65178191644619
C1	GSE14415_NATURAL_TREG_VS_FOXP3_KO_NATURAL_TREG_DN	Patient 1_Preinfusion, Patient 2_Preinfusion, Patient 4_Peak CAR T	1.83898416429332, 2.55544259454004, 2.5851662938377
C1	GSE1460_CD4_THYMOCYTE_VS_NAIVE_CD4_TCELL_ADULT_BLOOD_DN	Patient 2_Preinfusion, Patient 3_Preinfusion, Patient 4_Peak CAR T	2.69437087441212, 2.05885045104177, 2.20155839206764
C1	GSE1460_DP_THYMOCYTE_VS_NAIVE_CD4_TCELL_CORD_BLOOD_DN	Patient 1_Peak CAR T, Patient 1_Preinfusion, Patient 2_Preinfusion	2.06570181788185, 2.01445565919553, 1.9219010388164
C1	GSE1460_INTRATHYMIC_T_PROGENITOR_VS_CD4_THYMOCYTE_DN	Patient 1_Peak CAR T, Patient 1_Preinfusion, Patient 2_Preinfusion	2.06879095105783, 2.21432964144047, 2.33841072250816
C1	GSE1460_INTRATHYMIC_T_PROGENITOR_VS_NAIVE_CD4_TCELL_CORD_BLOOD_DN	Patient 1_Preinfusion, Patient 2_Preinfusion, Patient 4_Peak CAR T	1.83434288299607, 1.82446922883624, 1.8742796516981
C1	GSE15330_HSC_VS_LYMPHOID_PRIMED_MULTIPOTENT_PROGENITOR_UP	Patient 1_Peak CAR T, Patient 1_Preinfusion, Patient 4_Peak CAR T	1.98711964426261, 2.20853169325989, 2.38130890363479
C1	GSE16385_IFNG_TNF_VS_IL4_STIM_MACROPHAGE_ROSIGLITAZONE_TREATED_DN	Patient 1_Preinfusion, Patient 3_Peak, Patient 4_Peak CAR T	1.59860949989192, 2.25862970544792, 1.65288542008497
C1	GSE16385_IFNG_TNF_VS_IL4_STIM_MACROPHAGE_ROSIGLITAZONE_TREATED_UP	Patient 1_Preinfusion, Patient 3_Peak CAR T, Patient 4_Peak CAR T	1.9591388753663, 2.33335961461397, 1.6854710073412
C1	GSE16385_ROSIGLITAZONE_IL4_VS_IFNG_TNF_STIM_MACROPHAGE_UP	Patient 1_Preinfusion, Patient 2_Preinfusion, Patient 4_Peak CAR T	2.57824557312533, 2.87282434004509, 1.72939364389606
C1	GSE16450_IMMATURE_VS_MATURE_NEURON_CELL_LINE_UP	Patient 1_Preinfusion, Patient 2_Preinfusion, Patient 4_Peak CAR T	2.33515063175011, 3.59176159979238, 2.48957710223907
C1	GSE17301_IFNA2_VS_IFNA2_AND_ACD3_ACD28_STIM_CD8_TCELL_UP	Patient 1_Preinfusion, Patient 2_Preinfusion, Patient 4_Peak CAR T	3.0022218351609, 2.23406497378947, 2.04632879930956
C1	GSE17580_UNINFECTED_VS_S_MANSONI_INF_TEFF_DN	Patient 1_Preinfusion, Patient 1_Product, Patient 4_Peak CAR T	2.11167081877469, 2.10384191563514, 1.57767208505521
C1	GSE17721_POLYIC_VS_PAM3CSK4_0.5H_BMDC_DN	Patient 1_Preinfusion, Patient 3_Preinfusion, Patient 4_Preinfusion	1.87264095022263, 2.14352916438709, 2.04082664288416
C1	GSE17974_0H_VS_12H_IN_VITRO_ACT_CD4_TCELL_UP	Patient 1_Preinfusion, Patient 2_Preinfusion, Patient 4_Peak CAR T	2.5070431372853, 2.03733776640998, 2.77000754868994
C1	GSE17974_CTRL_VS_ACT_IL4_AND_ANTI_IL12_24H_CD4_TCELL_UP	Patient 1_Preinfusion, Patient 2_Preinfusion, Patient 4_Peak CAR T	2.44448127232775, 3.1735646887728, 2.38549960531034
C1	GSE17974_CTRL_VS_ACT_IL4_AND_ANTI_IL12_72H_CD4_TCELL_UP	Patient 1_Preinfusion, Patient 2_Preinfusion, Patient 4_Peak CAR T	1.82954825633696, 1.73933117094027, 2.07702644684755
C1	GSE17974_IL4_AND_ANTI_IL12_VS_UNTREATED_0.5H_ACT_CD4_TCELL_UP	Patient 2_Day 24 CART, Patient 3_Peak CAR T, Patient 4_Peak CAR T	1.41099291587891, 2.51201526657284, 1.70746374122212
C1	GSE19198_1H_VS_24H_IL21_TREATED_TCELL_DN	Patient 1_Preinfusion, Patient 2_Preinfusion, Patient 4_Peak CAR T	2.24634592861821, 2.10347624465102, 2.22649234390917
C1	GSE19888_ADENOSINE_A3R_ACT_VS_TCELL_MEMBRANES_ACT_IN_MAST_CELL_UP	Patient 1_Preinfusion, Patient 2_Day 24 CART, Patient 4_Peak CAR T	2.20361260204526, 1.41099291587891, 1.69705153019861
C1	GSE19888_CTRL_VS_A3R_INHIBITOR_TREATED_MAST_CELL_DN	Patient 1_Preinfusion, Patient 2_Preinfusion, Patient 4_Peak CAR T	1.96134331288352, 2.89053795133541, 2.39547880676598
C1	GSE19941_IL10_KO_VS_IL10_KO_AND_NFKBP50_KO_UNSTIM_MACROPHAGE_DN	Patient 1_Peak CAR T, Patient 2_Preinfusion, Patient 4_Peak CAR T	2.14798849099139, 1.8710976648513, 2.37518396121836
C1	GSE20366_EX_VIVO_VS_DEC205_CONVERSION_NAIVE_CD4_TCELL_UP	Patient 1_Preinfusion, Patient 3_Peak CAR T, Patient 4_Peak CAR T	1.84526411668898, 2.29084376068638, 1.64447034205534
C1	GSE20500_CTRL_VS_RETINOIC_ACID_TREATED_CD4_TCELL_DN	Patient 1_Preinfusion, Patient 3_Preinfusion, Patient 4_Peak CAR T	1.97101661861288, 2.31743142055124, 1.716999371843
C1	GSE20500_RETINOIC_ACID_VS_RARA_ANTAGONIST_TREATED_CD4_TCELL_DN	Patient 1_Peak CAR T, Patient 1_Preinfusion, Patient 4_Peak CAR T	2.10647154991634, 2.16011029061303, 1.89128184265927
C1	GSE21063_CTRL_VS_ANTI_IGM_STIM_BCELL_8H_UP	Patient 1_Preinfusion, Patient 2_Preinfusion, Patient 4_Peak CAR T	1.90562726141369, 2.12764091001254, 1.7311283400915
C1	GSE21063_CTRL_VS_ANTI_IGM_STIM_BCELL_NFATC1_KO_3H_DN	Patient 1_Preinfusion, Patient 2_Preinfusion, Patient 4_Peak CAR T	2.07775788027218, 2.28089375070586, 2.26823340012907
C1	GSE21360_PRIMARY_VS_TERTIARY_MEMORY_CD8_TCELL_DN	Patient 1_Peak CAR T, Patient 1_Preinfusion, Patient 4_Peak CAR T	1.8868209656196, 2.74012898367973, 1.99674986624527
C1	GSE21380_NON_TFH_VS_GERMINAL_CENTER_TFH_CD4_TCELL_UP	Patient 1_Peak CAR T, Patient 1_Preinfusion, Patient 4_Day 21	1.82652333741372, 1.77065451454236, 1.6635068684313
C1	GSE21546_UNSTIM_VS_ANTI_CD3_STIM_SAP1A_KO_AND_ELK1_KO_DP_THYMOCYTES_UP	Patient 1_Peak CAR T, Patient 1_Preinfusion, Patient 4_Peak CAR T	2.07387733466306, 2.86379627533632, 2.06666927464687
C1	GSE21546_WT_VS_SAP1A_KO_AND_ELK1_KO_DP_THYMOCYTES_UP	Patient 1_Preinfusion, Patient 2_Preinfusion, Patient 4_Peak CAR T	2.16542902657756, 2.03714409906296, 1.95182234187398
C1	GSE21670_IL6_VS_TGFB_AND_IL6_TREATED_STAT3_KO_CD4_TCELL_DN	Patient 1_Preinfusion, Patient 2_Day 24 CART, Patient 2_Preinfusion	2.28658342465875, 1.41099291587891, 2.42017674343065
C1	GSE21670_STAT3_KO_VS_WT_CD4_TCELL_TGFB_IL6_TREATED_DN	Patient 1_Preinfusion, Patient 2_Preinfusion, Patient 4_Peak CAR T	2.43334122936549, 2.19866020257683, 1.96605027113657
C1	GSE21670_STAT3_KO_VS_WT_CD4_TCELL_UP	Patient 1_Preinfusion, Patient 2_Preinfusion, Patient 4_Peak CAR T	1.76586975257959, 1.90883572614013, 1.84859508049196
C1	GSE21927_C26GM_VS_4T1_TUMOR_MONOCYTE_BALBC_DN	Patient 1_Peak CAR T, Patient 2_Preinfusion, Patient 4_Peak CAR T	2.76136679664854, 3.85430141738673, 2.12528465016015
C1	GSE22033_UNTREATED_VS_ROSIGLITAZONE_TREATED_MEF_DN	Patient 1_Preinfusion, Patient 2_Preinfusion, Patient 4_Peak CAR T	1.82567140036966, 2.03287150624987, 1.93378723872794
C1	GSE22033_WT_VS_PPARG_KO_MEF_UP	Patient 3_Preinfusion, Patient 4_Peak CAR T, Patient 4_Preinfusion	2.39734665212464, 1.78761948051476, 2.02050177982023
C1	GSE22886_DAY0_VS_DAY7_MONOCYTE_IN_CULTURE_UP	Patient 1_Preinfusion, Patient 2_Preinfusion, Patient 4_Peak CAR T	2.05218015027798, 2.09992844726388, 1.94015877853099
C1	GSE22886_DAY1_VS_DAY7_MONOCYTE_IN_CULTURE_UP	Patient 1_Preinfusion, Patient 3_Preinfusion, Patient 4_Peak CAR T	2.85401256626455, 2.02605778935387, 1.95134519966782
C1	GSE22886_DC_VS_MONOCYTE_DN	Patient 1_Preinfusion, Patient 2_Preinfusion, Patient 4_Peak CAR T	2.73072278476005, 2.40462911353028, 2.21826228786766
C1	GSE22886_NAIVE_BCELL_VS_MONOCYTE_DN	Patient 1_Preinfusion, Patient 3_Peak, Patient 4_Peak CAR T	1.75275720250323, 2.39943727785932, 1.81838210464556
C1	GSE22886_NAIVE_CD4_TCELL_VS_48H_ACT_TH1_UP	Patient 1_Preinfusion, Patient 2_Preinfusion, Patient 4_Peak CAR T	1.86708961524519, 2.95224607154226, 2.26651511207506
C1	GSE22886_NAIVE_CD4_TCELL_VS_DC_UP	Patient 1_Preinfusion, Patient 2_Preinfusion, Patient 4_Peak CAR T	1.83859860582195, 2.30310547545791, 1.94928289556497
C1	GSE22886_NEUTROPHIL_VS_DC_UP	Patient 1_Peak CAR T, Patient 1_Preinfusion, Patient 4_Peak CAR T	1.90494386547867, 2.13191301634582, 2.21272882888062
C1	GSE22886_NEUTROPHIL_VS_MONOCYTE_UP	Patient 1_Peak CAR T, Patient 1_Preinfusion, Patient 4_Peak CAR T	1.92873222139266, 2.19939723457906, 1.79359779349055
C1	GSE22886_TH1_VS_TH2_12H_ACT_UP	Patient 1_Peak CAR T, Patient 1_Preinfusion, Patient 4_Peak CAR T	1.85349778991736, 1.89051548165064, 1.98066312568688
C1	GSE23925_LIGHT_ZONE_VS_NAIVE_BCELL_UP	Patient 1_Peak CAR T, Patient 1_Preinfusion, Patient 4_Peak CAR T	2.10393911577945, 1.77665229236273, 2.63270757612483
C1	GSE24142_ADULT_VS_FETAL_DN3_THYMOCYTE_UP	Patient 1_Peak CAR T, Patient 1_Preinfusion, Patient 4_Peak CAR T	1.82824974614916, 1.69569810626101, 1.92616560504639
C1	GSE24142_ADULT_VS_FETAL_EARLY_THYMIC_PROGENITOR_UP	Patient 1_Preinfusion, Patient 2_Preinfusion, Patient 4_Peak CAR T	1.97221950175811, 1.98156388023355, 2.06392545537809
C1	GSE24142_EARLY_THYMIC_PROGENITOR_VS_DN2_THYMOCYTE_FETAL_UP	Patient 1_Preinfusion, Patient 2_Preinfusion, Patient 4_Peak CAR T	1.84741437894825, 1.71181396482263, 1.86988643702912
C1	GSE24574_BCL6_HIGH_VS_LOW_TFH_CD4_TCELL_UP	Patient 1_Preinfusion, Patient 2_Preinfusion, Patient 4_Peak CAR T	2.06250421218507, 4.16416015215543, 2.6372482100338
C1	GSE24634_NAIVE_CD4_TCELL_VS_DAY5_IL4_CONV_TREG_UP	Patient 1_Preinfusion, Patient 2_Preinfusion, Patient 4_Peak CAR T	2.39806741541097, 4.14235863417568, 2.04180005911255
C1	GSE24634_TREG_VS_TCONV_POST_DAY10_IL4_CONVERSION_DN	Patient 1_Peak CAR T, Patient 1_Preinfusion, Patient 4_Peak CAR T	2.03730969469985, 1.91298598724118, 1.7786067821047
C1	GSE25087_FETAL_VS_ADULT_TCONV_DN	Patient 1_Peak CAR T, Patient 4_Peak CAR T, Patient 4_Preinfusion	2.09052510842283, 1.84182942041568, 2.17473264486846
C1	GSE25088_CTRL_VS_IL4_STIM_STAT6_KO_MACROPHAGE_DN	Patient 1_Preinfusion, Patient 4_Peak, Patient 4_Peak CAR T	2.03074129313087, 2.22961864372705, 2.40475072795286
C1	GSE25088_WT_VS_STAT6_KO_MACROPHAGE_IL4_STIM_UP	Patient 1_Peak CAR T, Patient 1_Preinfusion, Patient 3_Preinfusion	2.237385037878, 2.14873138027699, 2.44456875381067
C1	GSE25123_IL4_VS_IL4_AND_ROSIGLITAZONE_STIM_MACROPHAGE_DAY10_UP	Patient 1_Preinfusion, Patient 3_Peak CAR T, Patient 3_Preinfusion	1.80706837034793, 2.08164064589109, 1.95298201849875
C1	GSE25123_WT_VS_PPARG_KO_MACROPHAGE_IL4_STIM_DN	Patient 1_Preinfusion, Patient 3_Peak, Patient 4_Peak CAR T	2.03415949425874, 2.15819465281227, 1.84608807076875
C1	GSE25502_WT_VS_KLF13_KO_THYMIC_MEMORY_LIKE_CD8_TCELL_DN	Patient 1_Preinfusion, Patient 3_Preinfusion, Patient 4_Peak CAR T	1.64056525613115, 1.82373645235621, 1.97116832450086
C1	GSE26156_DOUBLE_POSITIVE_VS_CD4_SINGLE_POSITIVE_THYMOCYTE_UP	Patient 1_Preinfusion, Patient 2_Preinfusion, Patient 4_Peak CAR T	1.88355018829258, 4.01817844075232, 2.01188374641298
C1	GSE26343_UNSTIM_VS_LPS_STIM_NFAT5_KO_MACROPHAGE_DN	Patient 1_Preinfusion, Patient 2_Preinfusion, Patient 4_Peak CAR T	1.74068718680626, 1.70263957500195, 2.01241500103557
C1	GSE26343_WT_VS_NFAT5_KO_MACROPHAGE_DN	Patient 1_Peak CAR T, Patient 1_Preinfusion, Patient 2_Preinfusion	2.11691865776991, 2.32830869497387, 1.99584863333137
C1	GSE2770_IL12_AND_TGFB_VS_IL4_TREATED_ACT_CD4_TCELL_6H_DN	Patient 1_Peak CAR T, Patient 1_Preinfusion, Patient 4_Peak CAR T	2.34065158083223, 2.13397306407934, 2.00755922308495
C1	GSE2770_TGFB_AND_IL4_VS_IL12_TREATED_ACT_CD4_TCELL_2H_DN	Patient 1_Preinfusion, Patient 2_Preinfusion, Patient 4_Peak CAR T	2.49254767365523, 2.01208302422181, 1.87242094317149
C1	GSE2770_TGFB_AND_IL4_VS_IL12_TREATED_ACT_CD4_TCELL_6H_UP	Patient 1_Preinfusion, Patient 2_Preinfusion, Patient 4_Peak CAR T	2.23635945714923, 1.88186650712151, 1.86054004227897
C1	GSE2770_UNTREATED_VS_ACT_CD4_TCELL_2H_UP	Patient 1_Preinfusion, Patient 2_Preinfusion, Patient 4_Peak CAR T	2.32971853161238, 2.79145737620898, 1.93228470967341
C1	GSE2770_UNTREATED_VS_ACT_CD4_TCELL_48H_DN	Patient 1_Preinfusion, Patient 2_Preinfusion, Patient 4_Peak CAR T	1.90594031349377, 2.06278944646885, 1.67171254876086
C1	GSE27786_BCELL_VS_CD8_TCELL_DN	Patient 1_Peak CAR T, Patient 1_Preinfusion, Patient 4_Peak CAR T	1.9584255926568, 1.91526965034782, 1.75007955303612
C1	GSE27786_LIN_NEG_VS_NEUTROPHIL_DN	Patient 1_Preinfusion, Patient 2_Preinfusion, Patient 4_Peak CAR T	2.37386636547047, 1.98605815186913, 1.61035797869065
C1	GSE27859_CD11C_INT_F480_HI_MACROPHAGE_VS_CD11C_ING_F480_INT_DC_DN	Patient 1_Preinfusion, Patient 2_Preinfusion, Patient 4_Peak CAR T	1.8760702295255, 3.04655391356499, 2.03313949848579
C1	GSE27859_DC_VS_CD11C_INT_F480_INT_DC_UP	Patient 1_Peak CAR T, Patient 2_Preinfusion, Patient 4_Peak CAR T	1.93892854244071, 1.8120530066629, 2.13164221798658
C1	GSE28408_LY6G_POS_VS_NEG_DC_UP	Patient 1_Preinfusion, Patient 2_Preinfusion, Patient 4_Peak CAR T	1.81456773627548, 2.61141687965196, 2.31641477704517
C1	GSE28726_ACT_CD4_TCELL_VS_ACT_VA24NEG_NKTCELL_DN	Patient 1_Preinfusion, Patient 2_Preinfusion, Patient 4_Peak CAR T	1.68489788552925, 3.03923810981714, 2.3252603990402
C1	GSE29618_BCELL_VS_PDC_DAY7_FLU_VACCINE_UP	Patient 1_Preinfusion, Patient 2_Preinfusion, Patient 4_Peak CAR T	1.70097748873319, 1.92462729108395, 1.83634673286974
C1	GSE29618_BCELL_VS_PDC_UP	Patient 1_Preinfusion, Patient 2_Preinfusion, Patient 4_Peak CAR T	1.96808082940882, 2.32564797347745, 2.20840739641317
C1	GSE29618_LAIV_VS_TIV_FLU_VACCINE_DAY7_MDC_DN	Patient 1_Preinfusion, Patient 3_Peak, Patient 3_Peak CAR T	1.97832508219271, 2.16028636738336, 2.29246691965855
C1	GSE29618_MONOCYTE_VS_MDC_DAY7_FLU_VACCINE_UP	Patient 1_Preinfusion, Patient 2_Preinfusion, Patient 4_Peak CAR T	2.2484721513142, 2.4047610921129, 1.80210649224628
C1	GSE29618_MONOCYTE_VS_MDC_UP	Patient 1_Preinfusion, Patient 2_Preinfusion, Patient 4_Peak CAR T	2.22595725415988, 1.99746728594325, 1.91502330538753
C1	GSE29618_PDC_VS_MDC_DAY7_FLU_VACCINE_DN	Patient 1_Preinfusion, Patient 3_Peak CAR T, Patient 4_Peak CAR T	1.9253243284876, 2.32292364230688, 1.92217095797214
C1	GSE29618_PDC_VS_MDC_DN	Patient 1_Preinfusion, Patient 3_Peak, Patient 3_Peak CAR T	1.67477100128657, 2.03999859436795, 2.64599765096812
C1	GSE29949_DC_BRAIN_VS_MONOCYTE_BONE_MARROW_DN	Patient 1_Peak CAR T, Patient 1_Preinfusion, Patient 2_Preinfusion	1.81895087828515, 1.95868767260995, 2.10485139428994
C1	GSE3039_CD4_TCELL_VS_ALPHABETA_CD8_TCELL_UP	Patient 1_Preinfusion, Patient 2_Preinfusion, Patient 4_Peak CAR T	2.65956600368409, 2.23948578696186, 2.16293892800113
C1	GSE31082_CD4_VS_CD8_SP_THYMOCYTE_UP	Patient 2_Preinfusion, Patient 3_Preinfusion, Patient 4_Peak CAR T	1.95562439664578, 2.37102917568678, 1.66555237926877
C1	GSE31082_DN_VS_CD4_SP_THYMOCYTE_DN	Patient 1_Peak CAR T, Patient 1_Preinfusion, Patient 4_Peak CAR T	2.02455070879958, 1.77443945318725, 1.77231764329324
C1	GSE32034_LY6C_HIGH_VS_LOW_MONOCYTE_UP	Patient 1_Peak CAR T, Patient 4_Peak CAR T, Patient 4_Product	1.89189552121299, 1.73562760017512, 1.90712857442261
C1	GSE32986_CURDLAN_LOWDOSE_VS_CURDLAN_HIGHDOSE_STIM_DC_DN	Patient 1_Peak CAR T, Patient 1_Preinfusion, Patient 4_Peak CAR T	2.19432847785375, 2.05630515266288, 1.76604912567725
C1	GSE33292_WT_VS_TCF1_KO_DN3_THYMOCYTE_UP	Patient 1_Preinfusion, Patient 2_Preinfusion, Patient 4_Peak CAR T	2.28494779219744, 2.33027550516548, 1.74316446170085
C1	GSE339_CD4POS_VS_CD8POS_DC_UP	Patient 1_Peak CAR T, Patient 1_Preinfusion, Patient 4_Peak CAR T	2.01878854328905, 2.29093255653267, 1.85214883025652
C1	GSE34006_WT_VS_A2AR_KO_TREG_DN	Patient 1_Peak CAR T, Patient 1_Preinfusion, Patient 2_Day 24 CART	1.99240258451024, 2.88081041602295, 1.41099291587891
C1	GSE34156_NOD2_LIGAND_VS_TLR1_TLR2_LIGAND_6H_TREATED_MONOCYTE_UP	Patient 1_Peak CAR T, Patient 1_Preinfusion, Patient 4_Peak CAR T	1.95246050230758, 2.91719361277568, 1.79891888929187
C1	GSE34392_ST2_KO_VS_WT_DAY8_LCMV_EFFECTOR_CD8_TCELL_DN	Patient 1_Peak CAR T, Patient 1_Preinfusion, Patient 1_Product	1.86378654091045, 2.01266744674693, 2.20992434213699
C1	GSE360_CTRL_VS_L_DONOVANI_DC_DN	Patient 1_Preinfusion, Patient 4_Peak CAR T, Patient 4_Preinfusion	2.0109019049162, 2.07684801493391, 2.17368052948435
C1	GSE360_T_GONDII_VS_B_MALAYI_LOW_DOSE_DC_DN	Patient 1_Peak CAR T, Patient 2_Preinfusion, Patient 4_Peak CAR T	2.10378422709249, 1.81102374275519, 1.66570613454857
C1	GSE360_T_GONDII_VS_M_TUBERCULOSIS_DC_DN	Patient 1_Peak CAR T, Patient 1_Preinfusion, Patient 4_Peak CAR T	2.29229482886523, 2.21757935773835, 1.80740580240412
C1	GSE36392_EOSINOPHIL_VS_NEUTROPHIL_IL25_TREATED_LUNG_UP	Patient 1_Peak CAR T, Patient 1_Preinfusion, Patient 4_Peak CAR T	1.82263688555768, 1.82646188782893, 1.81228093072408
C1	GSE36476_CTRL_VS_TSST_ACT_16H_MEMORY_CD4_TCELL_YOUNG_UP	Patient 1_Preinfusion, Patient 2_Preinfusion, Patient 4_Peak CAR T	2.56013377287662, 2.48147874510303, 2.6400582222722
C1	GSE36476_CTRL_VS_TSST_ACT_72H_MEMORY_CD4_TCELL_OLD_UP	Patient 1_Preinfusion, Patient 2_Preinfusion, Patient 4_Peak CAR T	2.02408338429461, 3.10225942625217, 2.75956679386484
C1	GSE36476_CTRL_VS_TSST_ACT_72H_MEMORY_CD4_TCELL_YOUNG_UP	Patient 1_Preinfusion, Patient 2_Preinfusion, Patient 4_Peak CAR T	2.25838884603548, 3.16692426500671, 2.99208467946233
C1	GSE369_PRE_VS_POST_IL6_INJECTION_SOCS3_KO_LIVER_UP	Patient 2_Day 24 CART, Patient 2_Preinfusion, Patient 4_Peak CAR T	1.41099291587891, 2.02778816456674, 1.78470348781405
C1	GSE3720_LPS_VS_PMA_STIM_VD2_GAMMADELTA_TCELL_UP	Patient 1_Preinfusion, Patient 2_Preinfusion, Patient 4_Peak CAR T	2.01995267311401, 1.76189746264227, 2.01232645424962
C1	GSE3720_UNSTIM_VS_LPS_STIM_VD1_GAMMADELTA_TCELL_UP	Patient 1_Peak CAR T, Patient 1_Preinfusion, Patient 4_Peak CAR T	2.18590132356128, 2.22312033197565, 2.25391574485133
C1	GSE37301_CD4_TCELL_VS_GRANULOCYTE_MONOCYTE_PROGENITOR_DN	Patient 1_Peak CAR T, Patient 1_Preinfusion, Patient 2_Preinfusion	2.2105870694405, 2.07080781072385, 1.76857760680833
C1	GSE37301_MULTIPOTENT_PROGENITOR_VS_LYMPHOID_PRIMED_MPP_DN	Patient 1_Preinfusion, Patient 3_Preinfusion, Patient 4_Peak CAR T	2.37707645285986, 1.98465096122875, 2.07898527597204
C1	GSE37533_PPARG1_FOXP3_VS_FOXP3_TRANSDUCED_CD4_TCELL_DN	Patient 1_Peak CAR T, Patient 1_Preinfusion, Patient 2_Preinfusion	2.40426262184582, 3.24130232579126, 2.14807125468733
C1	GSE38304_MYC_NEG_VS_POS_GC_BCELL_DN	Patient 3_Peak, Patient 3_Preinfusion, Patient 4_Peak CAR T	2.87340680607454, 2.0552456022139, 2.40599548968135
C1	GSE39556_CD8A_DC_VS_NK_CELL_MOUSE_3H_POST_POLYIC_INJ_DN	Patient 1_Preinfusion, Patient 2_Preinfusion, Patient 4_Peak CAR T	2.69870881650834, 2.20604750690749, 1.82151113198326
C1	GSE3982_DC_VS_NEUTROPHIL_LPS_STIM_DN	Patient 1_Peak CAR T, Patient 1_Preinfusion, Patient 4_Peak CAR T	2.0079096493777, 2.77900725902848, 2.00682011752106
C1	GSE3982_DC_VS_NKCELL_DN	Patient 1_Peak CAR T, Patient 1_Preinfusion, Patient 4_Peak CAR T	1.85687148484333, 2.12560001672907, 1.61791939993353
C1	GSE3982_EFF_MEMORY_CD4_TCELL_VS_TH1_UP	Patient 1_Preinfusion, Patient 3_Preinfusion, Patient 4_Peak CAR T	2.17326477592022, 2.27581470009425, 1.89696214096585
C1	GSE3982_EFF_MEMORY_CD4_TCELL_VS_TH2_UP	Patient 1_Preinfusion, Patient 2_Preinfusion, Patient 4_Peak CAR T	1.89336716960555, 1.86494441506142, 1.76739726316054
C1	GSE3982_EOSINOPHIL_VS_TH2_UP	Patient 1_Preinfusion, Patient 2_Preinfusion, Patient 3_Preinfusion	2.27157247856954, 1.91044356467971, 1.99282578390788
C1	GSE3982_MAC_VS_NKCELL_DN	Patient 1_Preinfusion, Patient 2_Preinfusion, Patient 4_Peak CAR T	1.99281425481144, 2.02136098176368, 1.642434869728
C1	GSE3982_MAST_CELL_VS_BASOPHIL_DN	Patient 1_Preinfusion, Patient 2_Preinfusion, Patient 3_Preinfusion	2.32039865198026, 1.68814639692212, 1.90998196848448
C1	GSE3982_NEUTROPHIL_VS_CENT_MEMORY_CD4_TCELL_UP	Patient 1_Preinfusion, Patient 2_Preinfusion, Patient 4_Peak CAR T	2.22608354796558, 2.11467679270346, 1.69133048772949
C1	GSE3982_NKCELL_VS_TH1_UP	Patient 1_Preinfusion, Patient 2_Preinfusion, Patient 3_Preinfusion	2.00667387195411, 2.13662600715609, 1.8865980499471
C1	GSE3994_WT_VS_PAC1_KO_ACTIVATED_MAST_CELL_DN	Patient 1_Peak CAR T, Patient 1_Preinfusion, Patient 4_Peak CAR T	2.25545620513367, 1.738486590411, 1.67547094916357
C1	GSE40274_CTRL_VS_LEF1_TRANSDUCED_ACTIVATED_CD4_TCELL_UP	Patient 1_Peak CAR T, Patient 1_Preinfusion, Patient 4_Peak CAR T	2.33967093122925, 2.40660772090367, 1.97284753381409
C1	GSE40274_FOXP3_VS_FOXP3_AND_EOS_TRANSDUCED_ACTIVATED_CD4_TCELL_UP	Patient 1_Preinfusion, Patient 2_Preinfusion, Patient 4_Peak CAR T	2.2955795432864, 1.85696053636804, 1.74267537453491
C1	GSE40274_FOXP3_VS_FOXP3_AND_IRF4_TRANSDUCED_ACTIVATED_CD4_TCELL_DN	Patient 1_Preinfusion, Patient 3_Peak CAR T, Patient 3_Preinfusion	1.96681461258407, 2.1124470670391, 2.28284314124883
C1	GSE40274_FOXP3_VS_FOXP3_AND_IRF4_TRANSDUCED_ACTIVATED_CD4_TCELL_UP	Patient 1_Peak CAR T, Patient 2_Preinfusion, Patient 4_Peak CAR T	2.06392311983303, 1.73474789566758, 2.12591666865649
C1	GSE40274_GATA1_VS_FOXP3_AND_GATA1_TRANSDUCED_ACTIVATED_CD4_TCELL_UP	Patient 1_Preinfusion, Patient 2_Preinfusion, Patient 4_Peak CAR T	2.66526036531542, 1.84331359616572, 1.89390441340186
C1	GSE40274_HELIOS_VS_FOXP3_AND_HELIOS_TRANSDUCED_ACTIVATED_CD4_TCELL_UP	Patient 1_Peak CAR T, Patient 1_Preinfusion, Patient 4_Peak CAR T	1.97344724913527, 2.35609218128309, 2.05297005985561
C1	GSE40274_LEF1_VS_FOXP3_AND_LEF1_TRANSDUCED_ACTIVATED_CD4_TCELL_DN	Patient 1_Peak CAR T, Patient 1_Preinfusion, Patient 4_Peak CAR T	2.04398089791803, 1.71581765596938, 1.84411945816632
C1	GSE40666_NAIVE_VS_EFFECTOR_CD8_TCELL_DN	Patient 1_Preinfusion, Patient 4_Peak CAR T, Patient 4_Product	1.83418330160315, 2.1151737400287, 2.10895054555794
C1	GSE40666_WT_VS_STAT4_KO_CD8_TCELL_WITH_IFNA_STIM_90MIN_UP	Patient 1_Preinfusion, Patient 2_Preinfusion, Patient 4_Peak CAR T	2.33109716404451, 2.29699249753405, 2.02809656080535
C1	GSE40685_TREG_VS_FOXP3_KO_TREG_PRECURSOR_DN	Patient 1_Peak CAR T, Patient 1_Preinfusion, Patient 3_Preinfusion	2.04332981067504, 2.12784906833707, 1.94933352800639
C1	GSE41087_WT_VS_FOXP3_MUT_ANTI_CD3_CD28_STIM_CD4_TCELL_UP	Patient 1_Preinfusion, Patient 2_Preinfusion, Patient 4_Peak CAR T	1.8597549195199, 2.26126987005915, 1.88158537765274
C1	GSE41176_UNSTIM_VS_ANTI_IGM_STIM_BCELL_1H_DN	Patient 1_Preinfusion, Patient 2_Preinfusion, Patient 4_Peak	1.79129520670707, 1.73368417806455, 2.3129627874317
C1	GSE41176_WT_VS_TAK1_KO_ANTI_IGM_STIM_BCELL_1H_DN	Patient 1_Peak CAR T, Patient 2_Preinfusion, Patient 4_Peak CAR T	2.12909889548616, 2.34798468728439, 1.71518571571359
C1	GSE41867_DAY15_EFFECTOR_VS_DAY30_EXHAUSTED_CD8_TCELL_LCMV_CLONE13_UP	Patient 1_Peak CAR T, Patient 1_Preinfusion, Patient 4_Peak CAR T	2.37021134362379, 2.93436315597871, 1.84585383433984
C1	GSE41867_NAIVE_VS_DAY8_LCMV_ARMSTRONG_EFFECTOR_CD8_TCELL_DN	Patient 1_Peak CAR T, Patient 1_Preinfusion, Patient 4_Peak CAR T	2.24621101435878, 1.87583485085368, 1.76005977173905
C1	GSE42021_CD24HI_VS_CD24LOW_TCONV_THYMUS_DN	Patient 1_Peak CAR T, Patient 1_Preinfusion, Patient 2_Preinfusion	1.87722937175188, 3.17708883777433, 1.72238836204936
C1	GSE42021_CD24INT_VS_CD24LOW_TCONV_THYMUS_DN	Patient 1_Preinfusion, Patient 3_Preinfusion, Patient 4_Peak CAR T	3.09930125273234, 1.96568579674395, 1.76356620417936
C1	GSE42021_TREG_PLN_VS_CD24LO_TREG_THYMUS_DN	Patient 1_Preinfusion, Patient 2_Day 24 CART, Patient 4_Peak CAR T	3.16917287077452, 1.41099291587891, 1.82133487482698
C1	GSE42088_UNINF_VS_LEISHMANIA_INF_DC_2H_DN	Patient 2_Preinfusion, Patient 4_Peak, Patient 4_Peak CAR T	2.97248923007797, 2.47622278440375, 2.1963907608304
C1	GSE42088_UNINF_VS_LEISHMANIA_INF_DC_4H_DN	Patient 2_Preinfusion, Patient 4_Peak, Patient 4_Peak CAR T	3.81029252525114, 2.07314515941683, 2.11289039267422
C1	GSE43863_LY6C_INT_CXCR5POS_VS_LY6C_LOW_CXCR5NEG_EFFECTOR_CD4_TCELL_DN	Patient 1_Peak CAR T, Patient 1_Preinfusion, Patient 4_Peak CAR T	2.05387778050232, 2.42508696265365, 2.17016728845585
C1	GSE43863_NAIVE_VS_MEMORY_LY6C_INT_CXCR5POS_CD4_TCELL_D150_LCMV_UP	Patient 1_Preinfusion, Patient 2_Preinfusion, Patient 4_Peak CAR T	2.38648917092011, 2.82212887827401, 2.05308550980825
C1	GSE43863_NAIVE_VS_TFH_CD4_EFF_TCELL_D6_LCMV_DN	Patient 1_Peak CAR T, Patient 1_Preinfusion, Patient 3_Preinfusion	1.70182861820112, 2.10914719099289, 2.1078458657617
C1	GSE43955_TH0_VS_TGFB_IL6_TH17_ACT_CD4_TCELL_20H_DN	Patient 1_Preinfusion, Patient 1_Product, Patient 4_Peak CAR T	1.7241473030483, 1.9318829570233, 1.83559295074506
C1	GSE44649_WT_VS_MIR155_KO_NAIVE_CD8_TCELL_DN	Patient 1_Preinfusion, Patient 2_Preinfusion, Patient 4_Peak CAR T	2.22424961991292, 1.75983254126174, 1.88982975763066
C1	GSE45365_NK_CELL_VS_CD8A_DC_UP	Patient 1_Preinfusion, Patient 3_Peak CAR T, Patient 4_Peak CAR T	2.09356973611949, 2.08897794105174, 1.85683074413013
C1	GSE4590_SMALL_VS_LARGE_PRE_BCELL_UP	Patient 1_Peak CAR T, Patient 1_Preinfusion, Patient 4_Peak CAR T	1.89626795785528, 1.90930436359733, 1.74988074162429
C1	GSE46242_TH1_VS_ANERGIC_TH1_CD4_TCELL_UP	Patient 1_Peak CAR T, Patient 1_Product, Patient 3_Preinfusion	1.88415990362092, 1.8775539054414, 2.43585209540875
C1	GSE46606_IRF4MID_VS_WT_CD40L_IL2_IL5_DAY3_STIMULATED_BCELL_DN	Patient 1_Peak CAR T, Patient 1_Preinfusion, Patient 2_Preinfusion	1.86972971001003, 2.00439692152629, 2.32087333727426
C1	GSE4748_CTRL_VS_CYANOBACTERIUM_LPSLIKE_STIM_DC_3H_UP	Patient 1_Preinfusion, Patient 2_Preinfusion, Patient 4_Peak CAR T	2.29246236777371, 2.2745905637728, 1.84806675404033
C1	GSE5455_EX_VIVO_VS_POST_24H_INCUBATION_MONOCYTES_FROM_TUMOR_BEARING_MOUSE_DN	Patient 1_Preinfusion, Patient 2_Preinfusion, Patient 4_Peak CAR T	2.65402585867511, 2.62715131771816, 1.64872763164689
C1	GSE5455_HEALTHY_VS_TUMOR_BEARING_MOUSE_SPLEEN_MONOCYTE_24H_INCUBATION_DN	Patient 1_Peak CAR T, Patient 1_Preinfusion, Patient 3_Preinfusion	2.03336664621334, 1.86587062924401, 2.10216977629434
C1	GSE5542_IFNG_VS_IFNA_TREATED_EPITHELIAL_CELLS_24H_DN	Patient 1_Peak CAR T, Patient 1_Preinfusion, Patient 2_Preinfusion	2.05199307827291, 1.90472944654886, 2.49576848951353
C1	GSE5542_UNTREATED_VS_IFNA_AND_IFNG_TREATED_EPITHELIAL_CELLS_6H_DN	Patient 1_Peak CAR T, Patient 1_Preinfusion, Patient 4_Peak CAR T	2.14229284155123, 2.07096464154992, 1.92761590210403
C1	GSE5589_LPS_AND_IL10_VS_LPS_AND_IL6_STIM_IL6_KO_MACROPHAGE_45MIN_UP	Patient 1_Peak CAR T, Patient 1_Preinfusion, Patient 1_Product	1.81985914726985, 2.49046656498245, 1.85104861792675
C1	GSE5679_PPARG_LIGAND_ROSIGLITAZONE_VS_ROSIGLITAZONE_AND_RARA_AGONIST_AM580_TREATED_DC_DN	Patient 1_Peak CAR T, Patient 1_Preinfusion, Patient 4_Peak CAR T	1.83234896082663, 1.85910892964644, 1.94183716894071
C1	GSE5960_TH1_VS_ANERGIC_TH1_DN	Patient 3_Peak, Patient 3_Preinfusion, Patient 4_Peak CAR T	2.15912096962426, 2.03967639702, 1.59870321651985
C1	GSE6259_33D1_POS_VS_DEC205_POS_FLT3L_INDUCED_SPLENIC_DC_UP	Patient 1_Peak CAR T, Patient 1_Preinfusion, Patient 1_Product	1.98652093617187, 2.05422365779231, 2.00098167714041
C1	GSE6259_BCELL_VS_CD8_TCELL_UP	Patient 1_Preinfusion, Patient 3_Preinfusion, Patient 4_Peak CAR T	1.74611355789127, 2.03540269563336, 1.87719601985743
C1	GSE6674_ANTI_IGM_VS_ANTI_IGM_AND_CPG_STIM_BCELL_UP	Patient 1_Peak CAR T, Patient 1_Preinfusion, Patient 2_Preinfusion	2.61947545648383, 2.00438323408621, 1.9009225856388
C1	GSE6674_ANTI_IGM_VS_CPG_STIM_BCELL_UP	Patient 1_Peak CAR T, Patient 1_Preinfusion, Patient 4_Peak CAR T	2.32357741785234, 1.89247122007096, 1.70172844627714
C1	GSE7218_IGM_VS_IGG_SIGNAL_THGOUGH_ANTIGEN_BCELL_DN	Patient 1_Peak CAR T, Patient 1_Preinfusion, Patient 4_Peak CAR T	2.09112915286192, 2.39908986885282, 1.72294168852551
C1	GSE7460_CTRL_VS_TGFB_TREATED_ACT_CD8_TCELL_DN	Patient 1_Preinfusion, Patient 2_Preinfusion, Patient 4_Peak CAR T	2.46463312989419, 1.83368081491453, 1.74559887686066
C1	GSE7460_CTRL_VS_TGFB_TREATED_ACT_TCONV_DN	Patient 1_Peak CAR T, Patient 1_Preinfusion, Patient 2_Preinfusion	2.19777483302001, 1.9567734559573, 1.98998063896956
C1	GSE7460_TCONV_VS_TREG_LN_UP	Patient 1_Preinfusion, Patient 3_Preinfusion, Patient 4_Peak CAR T	2.09402646975716, 1.89144318224426, 1.75286098162036
C1	GSE7460_TCONV_VS_TREG_THYMUS_UP	Patient 1_Preinfusion, Patient 2_Preinfusion, Patient 4_Peak CAR T	2.04597762118944, 1.98893485458528, 1.69165066328276
C1	GSE7568_IL4_VS_IL4_AND_TGFB_TREATED_MACROPHAGE_24H_UP	Patient 1_Preinfusion, Patient 2_Preinfusion, Patient 4_Peak CAR T	2.23607872958788, 2.13068614895407, 1.983089145818
C1	GSE7764_IL15_NK_CELL_24H_VS_SPLENOCYTE_DN	Patient 1_Preinfusion, Patient 2_Preinfusion, Patient 4_Peak CAR T	1.81693564578251, 2.19103783228181, 2.2267285800674
C1	GSE7852_TREG_VS_TCONV_LN_UP	Patient 1_Preinfusion, Patient 4_Peak CAR T, Patient 4_Preinfusion	2.50159364890227, 1.9743886597689, 2.06882925623433
C1	GSE8921_UNSTIM_0H_VS_TLR1_2_STIM_MONOCYTE_12H_DN	Patient 1_Peak CAR T, Patient 1_Preinfusion, Patient 2_Preinfusion	2.43648428728231, 1.7236832537397, 1.84200282425282
C1	GSE9316_IL6_KO_VS_IFNG_KO_INVIVO_EXPANDED_CD4_TCELL_DN	Patient 1_Preinfusion, Patient 1_Product, Patient 4_Peak CAR T	2.57121937936049, 2.20585441382673, 1.73935496541867
C1	GSE9509_LPS_VS_LPS_AND_IL10_STIM_IL10_KO_MACROPHAGE_30MIN_UP	Patient 2_Preinfusion, Patient 3_Preinfusion, Patient 4_Peak CAR T	2.06505304934341, 2.02674808873637, 1.79814733252641
C1	HALLMARK_IL2_STAT5_SIGNALING	Patient 1_Peak CAR T, Patient 1_Preinfusion, Patient 4_Peak CAR T	1.7439339860101, 1.948870241564, 1.89975391654993
C1	HALLMARK_INFLAMMATORY_RESPONSE	Patient 1_Preinfusion, Patient 1_Product, Patient 4_Peak CAR T	2.45681599412364, 1.90147190329449, 1.66217299237809
C1	HP_ABNORMAL_ERYTHROCYTE_ENZYME_LEVEL	Patient 2_Preinfusion, Patient 3_Preinfusion, Patient 4_Peak	2.88170392168041, 1.91559118897373, 2.58231641827521
C1	HP_ABNORMAL_NUMBER_OF_ERYTHROID_PRECURSORS	Patient 2_Preinfusion, Patient 3_Preinfusion, Patient 4_Peak	2.94576514892851, 1.97397947484394, 2.73240530174324
C1	HP_ABNORMALITY_OF_THE_THENAR_EMINENCE	Patient 2_Preinfusion, Patient 3_Preinfusion, Patient 4_Peak	2.88170392168041, 1.97397947484394, 2.62645881929865
C1	HP_ADENOCARCINOMA_OF_THE_INTESTINES	Patient 2_Preinfusion, Patient 3_Preinfusion, Patient 4_Peak	2.64680315439988, 1.97397947484394, 2.62645881929865
C1	HP_ADENOCARCINOMA_OF_THE_LARGE_INTESTINE	Patient 2_Preinfusion, Patient 3_Preinfusion, Patient 4_Peak	2.79872274131881, 1.97397947484394, 2.62645881929865
C1	HP_ELEVATED_RED_CELL_ADENOSINE_DEAMINASE_LEVEL	Patient 2_Preinfusion, Patient 3_Preinfusion, Patient 4_Peak	2.88170392168041, 1.97397947484394, 2.62645881929865
C1	HP_ERYTHROID_HYPOPLASIA	Patient 2_Preinfusion, Patient 3_Preinfusion, Patient 4_Peak	3.03828578614075, 1.97397947484394, 2.73240530174324
C1	HP_GASTROINTESTINAL_CARCINOMA	Patient 2_Preinfusion, Patient 3_Preinfusion, Patient 4_Peak	2.76469359913884, 1.98699703160593, 2.72073698348116
C1	HP_HYDROPS_FETALIS	Patient 2_Preinfusion, Patient 3_Preinfusion, Patient 4_Peak	2.44893195821187, 2.07208644495531, 2.24998144219386
C1	HP_NONIMMUNE_HYDROPS_FETALIS	Patient 2_Preinfusion, Patient 3_Preinfusion, Patient 4_Peak	2.88170392168041, 1.97397947484394, 2.56665436881536
C1	HP_OSTEOSARCOMA	Patient 2_Preinfusion, Patient 3_Preinfusion, Patient 4_Peak	2.59477030050056, 2.3215957290084, 2.62645881929865
C1	HP_PARTIAL_DUPLICATION_OF_THE_PHALANX_OF_HAND	Patient 2_Preinfusion, Patient 3_Preinfusion, Patient 4_Peak	2.57636033322379, 1.97397947484394, 2.62645881929865
C1	HP_PURE_RED_CELL_APLASIA	Patient 2_Preinfusion, Patient 3_Preinfusion, Patient 4_Peak	2.80987657145042, 1.97397947484394, 2.62645881929865
C1	HP_SPRENGEL_ANOMALY	Patient 2_Preinfusion, Patient 3_Preinfusion, Patient 4_Peak	3.03421805497428, 2.10496958224572, 2.49469710297978
C1	IL21_UP.V1_UP	Patient 1_Peak CAR T, Patient 1_Preinfusion, Patient 4_Peak CAR T	1.70889295843421, 1.7582886970173, 1.82654752586026
C1	IRF1_01	Patient 1_Preinfusion, Patient 3_Preinfusion, Patient 4_Peak CAR T	1.98624692979056, 2.12151876185455, 1.92994676367669
C1	JAK2_DN.V1_UP	Patient 1_Peak CAR T, Patient 1_Preinfusion, Patient 3_Preinfusion	1.34136276360741, 1.90182042373173, 1.60645153102808
C1	KAECH_DAY8_EFF_VS_DAY15_EFF_CD8_TCELL_DN	Patient 1_Peak CAR T, Patient 1_Preinfusion, Patient 2_Preinfusion	1.88761407324602, 2.06628290469423, 1.91704590899487
C1	KAECH_DAY8_EFF_VS_MEMORY_CD8_TCELL_DN	Patient 1_Preinfusion, Patient 2_Preinfusion, Patient 4_Peak CAR T	1.88809853833668, 2.21942832322085, 2.45052961367756
C1	KEGG_CHEMOKINE_SIGNALING_PATHWAY	Patient 1_Product, Patient 3_Product, Patient 4_Product	1.86138749268601, 1.75221556820582, 1.8607009099701
C1	KEGG_PRIMARY_IMMUNODEFICIENCY	Patient 1_Preinfusion, Patient 1_Product, Patient 4_Peak CAR T	1.90621354702205, 1.99852822172172, 1.76853742536587
C1	KEGG_PRION_DISEASES	Patient 1_Product, Patient 3_Preinfusion, Patient 4_Preinfusion	1.77395829901894, 2.01467491099629, 1.80993594242574
C1	KEGG_T_CELL_RECEPTOR_SIGNALING_PATHWAY	Patient 1_Preinfusion, Patient 1_Product, Patient 4_Peak CAR T	1.85291788339912, 2.01314860686496, 2.00287717947942
C1	KEGG_VIRAL_MYOCARDITIS	Patient 1_Preinfusion, Patient 1_Product, Patient 4_Peak CAR T	1.98784557391866, 1.60974226565373, 1.8734882339366
C1	KRAS.600_UP.V1_UP	Patient 1_Preinfusion, Patient 2_Preinfusion, Patient 4_Peak CAR T	2.09962333746648, 2.30924399738182, 1.92304374026121
C1	LAKE_ADULT_KIDNEY_C10_THIN_ASCENDING_LIMB	Patient 3_Peak CAR T, Patient 4_Peak, Patient 4_Peak CAR T	1.91719812468267, 2.44978410036059, 1.58888386233903
C1	LAKE_ADULT_KIDNEY_C12_THICK_ASCENDING_LIMB	Patient 2_Preinfusion, Patient 3_Peak CAR T, Patient 4_Peak	2.14275501890256, 2.26557924207656, 3.6509204699535
C1	LAKE_ADULT_KIDNEY_C23_ENDOTHELIAL_CELLS_AVR	Patient 2_Preinfusion, Patient 3_Peak CAR T, Patient 4_Peak	2.09701735560347, 1.7329148438427, 1.82750382212356
C1	LAKE_ADULT_KIDNEY_C27_VASCULAR_SMOOTH_MUSCLE_CELLS_AND_PERICYTES	Patient 1_Preinfusion, Patient 2_Preinfusion, Patient 4_Peak CAR T	2.13433271513049, 1.78888617723725, 2.13285637688383
C1	LAKE_ADULT_KIDNEY_C9_THIN_ASCENDING_LIMB	Patient 2_Peak2, Patient 3_Peak CAR T, Patient 4_Peak	1.89536098502953, 2.12682888130998, 2.77371067227685
C1	LI_PBMC_MENACTRA_AGE_18_45YO_CORRELATED_WITH_ANTI_DT_ANTIBODY_3DY_POSITIVE	Patient 1_Preinfusion, Patient 3_Peak CAR T, Patient 3_Preinfusion	2.12395590000693, 1.80894107615224, 1.94782578300387
C1	MANNO_MIDBRAIN_NEUROTYPES_HNBGABA	Patient 1_Preinfusion, Patient 2_Preinfusion, Patient 4_Peak CAR T	1.78613041012, 1.64227331701945, 1.91852161250556
C1	MANNO_MIDBRAIN_NEUROTYPES_HRGL3	Patient 1_Peak CAR T, Patient 1_Preinfusion, Patient 4_Peak CAR T	1.9633771987655, 2.19128657369971, 1.75205273880536
C1	MATSUMIYA_PBMC_MODIFIED_VACCINIA_ANKARA_VACCINE_AGE_18_55YO_2DY_UP	Patient 1_Preinfusion, Patient 3_Peak, Patient 4_Peak CAR T	2.74515863689879, 2.01705793527895, 1.75572663142694
C1	MENON_FETAL_KIDNEY_5_PROXIMAL_TUBULE_CELLS	Patient 3_Peak, Patient 3_Peak CAR T, Patient 4_Peak	2.34685161141444, 2.2423462700127, 2.00086380312039
C1	MODULE_104	Patient 1_Peak CAR T, Patient 1_Preinfusion, Patient 4_Day 21	1.84814320008533, 1.94268754073078, 1.81342857549886
C1	MODULE_169	Patient 1_Preinfusion, Patient 1_Product, Patient 4_Peak CAR T	1.76808706880013, 2.29706543422601, 1.89231497646513
C1	MODULE_172	Patient 1_Preinfusion, Patient 1_Product, Patient 3_Peak CAR T	2.18277149570316, 1.89244731428713, 2.0190139530694
C1	MODULE_176	Patient 1_Peak CAR T, Patient 1_Preinfusion, Patient 4_Day 21	1.88943713310133, 2.10103455242307, 1.90857760569478
C1	MODULE_188	Patient 1_Peak CAR T, Patient 2_Preinfusion, Patient 4_Peak CAR T	1.9239620586502, 1.94846794193304, 1.74082799852365
C1	MODULE_2	Patient 1_Preinfusion, Patient 2_Preinfusion, Patient 4_Peak CAR T	2.55967307341796, 2.24858081877716, 2.1544582885037
C1	MODULE_209	Patient 1_Preinfusion, Patient 1_Product, Patient 3_Peak CAR T	2.06657043765063, 1.89244731428713, 2.0190139530694
C1	MODULE_238	Patient 1_Peak CAR T, Patient 2_Preinfusion, Patient 4_Peak CAR T	1.95932733010012, 2.0376919242502, 1.75117589330314
C1	MODULE_301	Patient 1_Peak CAR T, Patient 2_Preinfusion, Patient 4_Peak CAR T	2.02723795446562, 2.1961862327384, 1.6735593297163
C1	MODULE_324	Patient 1_Preinfusion, Patient 3_Peak CAR T, Patient 4_Peak CAR T	1.84745201791958, 1.93706356191832, 1.81009902757857
C1	MODULE_436	Patient 1_Peak CAR T, Patient 1_Preinfusion, Patient 3_Preinfusion	2.33001973155065, 3.03201552818868, 1.92936691624494
C1	MODULE_88	Patient 1_Preinfusion, Patient 1_Product, Patient 3_Peak CAR T	1.85106370354766, 2.06343095894179, 2.09432314766419
C1	MORF_BCL2	Patient 2_Preinfusion, Patient 3_Preinfusion, Patient 4_Peak CAR T	1.68966000216542, 1.86761602952626, 1.77162543786086
C1	MURARO_PANCREAS_ACINAR_CELL	Patient 2_Preinfusion, Patient 3_Peak CAR T, Patient 4_Peak	2.29625091068861, 1.58453646773872, 1.58087583813768
C1	NAKAYA_MONOCYTE_FLUMIST_AGE_18_50YO_7DY_DN	Patient 1_Preinfusion, Patient 1_Product, Patient 4_Peak CAR T	2.26507236065847, 1.91956054841049, 1.94475632481479
C1	NAKAYA_PBMC_FLUARIX_FLUVIRIN_AGE_18_50YO_7DY_DN	Patient 1_Preinfusion, Patient 2_Preinfusion, Patient 4_Peak CAR T	1.61784437087449, 1.80194509302859, 2.28796091957141
C1	NFKB_C	Patient 1_Preinfusion, Patient 1_Product, Patient 3_Product	2.45481302972859, 1.92906316367815, 1.78006046518983
C1	OSMAN_BLOOD_CHAD63_KH_AGE_18_50YO_HIGH_DOSE_SUBJECTS_24HR_UP	Patient 1_Peak CAR T, Patient 1_Preinfusion, Patient 4_Peak CAR T	2.12971190680284, 2.61869354533252, 1.40533849433779
C1	PANAPASA_BLOOD_FLUENZ_AGE_03_17YO_3DY_4DY_DN	Patient 3_Peak CAR T, Patient 4_Peak CAR T, Patient 4_Preinfusion	1.61375726758316, 1.58091988447084, 1.60709450363802
C1	PID_IL12_STAT4_PATHWAY	Patient 1_Peak CAR T, Patient 1_Preinfusion, Patient 4_Peak CAR T	2.20466532076723, 2.30987121455711, 2.55277254699446
C1	QI_PBMC_ZOSTAVAX_AGE_50_75YO_CORRELATED_WITH_EXPANSION_OF_VZV_SPECIFIC_T_CELLS_TO_PEAK_AT_1DY_POSITIVE	Patient 1_Preinfusion, Patient 2_Preinfusion, Patient 4_Peak CAR T	1.88672255997294, 1.71478770495599, 1.89449182112484
C1	REACTOME_ACTIVATION_OF_IRF3_IRF7_MEDIATED_BY_TBK1_IKK_EPSILON	Patient 1_Preinfusion, Patient 2_Preinfusion, Patient 3_Preinfusion	1.91775732804674, 1.85913357869855, 1.66642681824967
C1	REACTOME_ADAPTIVE_IMMUNE_SYSTEM	Patient 1_Preinfusion, Patient 3_Preinfusion, Patient 4_Peak CAR T	1.95243674592901, 1.89043904065834, 1.60534376213936
C1	REACTOME_CLASS_A_1_RHODOPSIN_LIKE_RECEPTORS	Patient 1_Preinfusion, Patient 3_Peak, Patient 4_Peak CAR T	2.52607286490515, 2.07276998291631, 2.41358842467109
C1	REACTOME_COSTIMULATION_BY_THE_CD28_FAMILY	Patient 1_Preinfusion, Patient 3_Preinfusion, Patient 4_Peak CAR T	2.23838142897566, 2.44320075277995, 1.99054519373249
C1	REACTOME_FGFR2_LIGAND_BINDING_AND_ACTIVATION	Patient 1_Preinfusion, Patient 2_Preinfusion, Patient 4_Peak CAR T	1.33260936233907, 1.33343078865379, 1.33425531467866
C1	REACTOME_FGFR2B_LIGAND_BINDING_AND_ACTIVATION	Patient 1_Preinfusion, Patient 2_Preinfusion, Patient 4_Peak CAR T	1.33260936233907, 1.33343078865379, 1.33425531467866
C1	REACTOME_GENERATION_OF_SECOND_MESSENGER_MOLECULES	Patient 1_Preinfusion, Patient 3_Preinfusion, Patient 4_Peak CAR T	2.19005934728002, 2.272806461658, 1.91989190414028
C1	REACTOME_GLYCOGEN_SYNTHESIS	Patient 1_Preinfusion, Patient 3_Preinfusion, Patient 4_Peak	1.65284959488822, 1.66642681824967, 1.77746301770767
C1	REACTOME_GPCR_LIGAND_BINDING	Patient 1_Preinfusion, Patient 3_Peak, Patient 4_Peak CAR T	2.57279981379633, 2.1010408624543, 2.60370970584291
C1	REACTOME_IKK_COMPLEX_RECRUITMENT_MEDIATED_BY_RIP1	Patient 2_Preinfusion, Patient 3_Preinfusion, Patient 4_Peak	1.63669788944762, 1.66642681824967, 1.77746301770767
C1	REACTOME_INNATE_IMMUNE_SYSTEM	Patient 1_Preinfusion, Patient 2_Peak2, Patient 4_Peak CAR T	1.57514820554135, 2.15546644490896, 1.53400961684838
C1	REACTOME_INTERFERON_GAMMA_SIGNALING	Patient 1_Preinfusion, Patient 2_Day 24 CART, Patient 3_Preinfusion	3.43997019759264, 1.39753275749306, 2.0486481219123
C1	REACTOME_INTERLEUKIN_10_SIGNALING	Patient 1_Preinfusion, Patient 3_Preinfusion, Patient 4_Peak	1.800879975736, 1.33853735107976, 1.60543074796379
C1	REACTOME_IRAK1_RECRUITS_IKK_COMPLEX	Patient 2_Preinfusion, Patient 3_Preinfusion, Patient 4_Peak	1.63669788944762, 1.66642681824967, 1.77746301770767
C1	REACTOME_JNK_C_JUN_KINASES_PHOSPHORYLATION_AND_ACTIVATION_MEDIATED_BY_ACTIVATED_HUMAN_TAK1	Patient 2_Preinfusion, Patient 3_Preinfusion, Patient 4_Peak	1.63669788944762, 1.66642681824967, 1.77746301770767
C1	REACTOME_REGULATION_OF_FZD_BY_UBIQUITINATION	Patient 2_Preinfusion, Patient 3_Preinfusion, Patient 4_Peak	1.63669788944762, 1.66642681824967, 1.77746301770767
C1	REACTOME_REGULATION_OF_PTEN_LOCALIZATION	Patient 1_Preinfusion, Patient 2_Preinfusion, Patient 4_Peak	1.80359812536683, 1.84276384907479, 1.77746301770767
C1	REACTOME_TICAM1_RIP1_MEDIATED_IKK_COMPLEX_RECRUITMENT	Patient 2_Preinfusion, Patient 3_Preinfusion, Patient 4_Peak	1.63669788944762, 1.66642681824967, 1.77746301770767
C1	REACTOME_TNFR1_INDUCED_NFKAPPAB_SIGNALING_PATHWAY	Patient 1_Preinfusion, Patient 2_Preinfusion, Patient 4_Peak	1.91557162597811, 1.63669788944762, 1.77746301770767
C1	RPS14_DN.V1_UP	Patient 1_Preinfusion, Patient 2_Preinfusion, Patient 4_Peak CAR T	2.31370863917079, 2.62273917330776, 2.20354844868458
C1	RUBENSTEIN_SKELETAL_MUSCLE_PCV_ENDOTHELIAL_CELLS	Patient 2_Preinfusion, Patient 3_Peak CAR T, Patient 4_Peak	2.00223348898331, 2.3536593230771, 2.25833910460525
C1	SCHERER_PBMC_APSV_WETVAX_AGE_18_40YO_JOINT_TO_VACCINIA_AND_YELLOW_FEVER_UP	Patient 1_Peak CAR T, Patient 1_Preinfusion, Patient 4_Peak CAR T	1.76372264159828, 2.37345019193873, 1.82910869404678
C1	SCHERER_PBMC_YF_VAX_AGE_18_40YO_JOINT_TO_VACCINIA_AND_YELLOW_FEVER_UP	Patient 1_Peak CAR T, Patient 1_Preinfusion, Patient 4_Peak CAR T	1.76372264159828, 2.37345019193873, 1.82910869404678
C1	STK33_NOMO_UP	Patient 1_Peak CAR T, Patient 1_Preinfusion, Patient 4_Peak CAR T	1.88430156126544, 2.47040256141005, 2.5628565663399
C1	STK33_SKM_DN	Patient 1_Preinfusion, Patient 2_Preinfusion, Patient 4_Peak CAR T	1.86171774764883, 1.88834295765466, 1.905649456474
C1	STK33_SKM_UP	Patient 1_Peak CAR T, Patient 1_Preinfusion, Patient 4_Peak CAR T	1.85157970147414, 2.04911212947717, 2.2286095315509
C1	STK33_UP	Patient 1_Peak CAR T, Patient 1_Preinfusion, Patient 4_Peak CAR T	2.25303054873766, 2.37128258039923, 2.55853073712147
C1	T.cell.exhaustion..HCV.	Patient 1_Preinfusion, Patient 1_Product, Patient 3_Product	1.57208491495818, 1.59753286986963, 1.67679516582484
C1	TGFB_UP.V1_DN	Patient 1_Peak CAR T, Patient 1_Preinfusion, Patient 4_Peak CAR T	1.8849423218253, 2.28795002652716, 2.09679356416087
C1	Th1	Patient 1_Preinfusion, Patient 1_Product, Patient 4_Product	2.11701047415214, 1.86995379858547, 1.70814704338451
C1	TRAVAGLINI_LUNG_ADVENTITIAL_FIBROBLAST_CELL	Patient 1_Preinfusion, Patient 3_Peak CAR T, Patient 4_Peak CAR T	1.74961166858997, 2.11925392147554, 2.3687337429088
C1	TRAVAGLINI_LUNG_CD4_NAIVE_T_CELL	Patient 2_Preinfusion, Patient 3_Peak CAR T, Patient 4_Peak	4.28159894331627, 2.10171118308197, 2.43935456257924
C1	TRAVAGLINI_LUNG_CLUB_CELL	Patient 2_Preinfusion, Patient 3_Peak CAR T, Patient 4_Peak	3.62546235259488, 1.85815578004257, 3.46154303843859
C1	TRAVAGLINI_LUNG_TREM2_DENDRITIC_CELL	Patient 2_Peak2, Patient 3_Peak, Patient 3_Peak CAR T	1.96044676587576, 2.1557024770485, 2.25156655939585
C1	TTCYNRGAA_STAT5B_01	Patient 3_Product, Patient 4_Peak CAR T, Patient 4_Product	1.92685940330144, 1.81686062393263, 1.91705937412673
C1	WEINBERGER_BLOOD_TWINRIX_AGE_20_40_AND_60_84YO_CORRELATED_WITH_HIGH_ANTI_HBS_CONC_AT_WEEK_30_PRIMARY_VACC_1DY_POSITIVE	Patient 1_Preinfusion, Patient 4_Peak CAR T, Patient 4_Preinfusion	1.56367673257409, 1.67121324429738, 1.59832215372733
C1	ZHENG_CORD_BLOOD_C6_HSC_MULTIPOTENT_PROGENITOR	Patient 1_Preinfusion, Patient 2_Preinfusion, Patient 4_Peak CAR T	2.40356027033179, 1.87171222160973, 2.46557314393628
C1	ZHENG_CORD_BLOOD_C8_PUTATIVE_LYMPHOID_PRIMED_MULTIPOTENT_PROGENITOR_2	Patient 1_Preinfusion, Patient 4_Peak, Patient 4_Peak CAR T	1.60036337693332, 1.7406133388584, 2.10004778452181
C1	AAANWWTGC_UNKNOWN	Patient 1_Preinfusion, Patient 4_Peak CAR T	2.15866165859067, 1.897552781513
C1	AIZARANI_LIVER_C14_HEPATOCYTES_2	Patient 1_Day 7, Patient 3_Peak	1.97546167500646, 1.74760844902681
C1	AIZARANI_LIVER_C21_STELLATE_CELLS_1	Patient 3_Peak CAR T, Patient 4_Peak CAR T	1.95308354825825, 2.20711150722639
C1	AIZARANI_LIVER_C25_KUPFFER_CELLS_4	Patient 1_Preinfusion, Patient 4_Peak CAR T	1.60440679581441, 2.10587047086898
C1	AIZARANI_LIVER_C34_MHC_II_POS_B_CELLS	Patient 1_Preinfusion, Patient 2_Preinfusion	1.91955291543762, 2.31257848557711
C1	BIOCARTA_CASPASE_PATHWAY	Patient 1_Product, Patient 2_Peak	1.75431141843539, 1.64596217567162
C1	BIOCARTA_TCRA_PATHWAY	Patient 1_Preinfusion, Patient 4_Peak CAR T	1.899529373955, 1.83114343953325
C1	BIOCARTA_TOB1_PATHWAY	Patient 3_Preinfusion, Patient 4_Peak CAR T	2.2443657601773, 1.93100965972598
C1	BUSSLINGER_GASTRIC_PARIETAL_CELLS	Patient 3_Peak, Patient 3_Peak CAR T	1.83298352532607, 2.62238219254912
C1	BUSSLINGER_GASTRIC_PPP1R1B_POSITIVE_CELLS	Patient 2_Preinfusion, Patient 4_Peak	2.87480983510297, 2.7500531808482
C1	CAHOY_ASTROGLIAL	Patient 1_Peak CAR T, Patient 1_Preinfusion	1.59300493440894, 2.06434769576837
C1	CD4_Th1	Patient 1_Preinfusion, Patient 4_Peak CAR T	1.63590409450644, 1.98359898062738
C1	CSR_LATE_UP.V1_DN	Patient 1_Peak CAR T, Patient 1_Preinfusion	1.78626445123818, 2.04098869426384
C1	CTIP_DN.V1_DN	Patient 1_Preinfusion, Patient 4_Peak CAR T	1.84878219588271, 2.06198320503057
C1	CUI_DEVELOPING_HEART_C3_FIBROBLAST_LIKE_CELL	Patient 1_Day 7, Patient 1_Product	1.86164164016605, 1.51182251886776
C1	CUI_DEVELOPING_HEART_C5_VALVAR_CELL	Patient 1_Preinfusion, Patient 4_Peak CAR T	1.68359114041725, 2.55899768163245
C1	CUI_DEVELOPING_HEART_C6_EPICARDIAL_CELL	Patient 1_Preinfusion, Patient 4_Peak CAR T	1.72135270016533, 2.37285677454613
C1	CUI_DEVELOPING_HEART_COMPACT_VENTRICULAR_CARDIOMYOCYTE	Patient 1_Product, Patient 3_Peak CAR T	1.68686049176215, 2.45539340333489
C1	CUI_DEVELOPING_HEART_SMOOTH_MUSCLE_CELL	Patient 2_Product, Patient 4_Peak CAR T	1.68307526528164, 1.72504824337894
C1	DCA_UP.V1_DN	Patient 3_Preinfusion, Patient 4_Peak CAR T	2.13929766610642, 1.66898652209124
C1	DESCARTES_FETAL_CEREBELLUM_OLIGODENDROCYTES	Patient 1_Preinfusion, Patient 4_Peak CAR T	1.5241096764441, 1.32266525989825
C1	DESCARTES_FETAL_EYE_MICROGLIA	Patient 1_Peak CAR T, Patient 1_Preinfusion	2.08946676688989, 2.77987261277571
C1	DESCARTES_FETAL_HEART_MEGAKARYOCYTES	Patient 1_Preinfusion, Patient 4_Peak CAR T	1.59922860980695, 1.63672402793181
C1	DESCARTES_FETAL_INTESTINE_MYELOID_CELLS	Patient 1_Preinfusion, Patient 3_Peak CAR T	1.80002856991787, 1.5692185982033
C1	DESCARTES_FETAL_LIVER_MYELOID_CELLS	Patient 1_Preinfusion, Patient 2_Preinfusion	1.63238208161151, 1.70192001126546
C1	DESCARTES_FETAL_LUNG_MYELOID_CELLS	Patient 1_Preinfusion, Patient 3_Peak CAR T	1.58772702988261, 1.5692185982033
C1	DESCARTES_FETAL_MUSCLE_SKELETAL_MUSCLE_CELLS	Patient 1_Peak CAR T, Patient 1_Preinfusion	1.3182433234515, 1.32920631705842
C1	DESCARTES_MAIN_FETAL_RETINAL_PROGENITORS_AND_MULLER_GLIA	Patient 3_Preinfusion, Patient 4_Peak CAR T	1.58774550066659, 1.54180963267634
C1	DURANTE_ADULT_OLFACTORY_NEUROEPITHELIUM_B_CELLS	Patient 1_Preinfusion, Patient 1_Product	2.19878221547233, 1.68804895274242
C1	ESC_J1_UP_LATE.V1_UP	Patient 1_Preinfusion, Patient 4_Peak CAR T	2.19784336675846, 1.69493877172898
C1	ESC_V6.5_UP_EARLY.V1_DN	Patient 1_Peak CAR T, Patient 1_Preinfusion	1.81887479692425, 2.16625350612953
C1	EtienneStatNeg	Patient 2_Preinfusion, Patient 4_Peak CAR T	2.11874256735913, 1.37479113775483
C1	FAN_OVARY_CL0_XBP1_SELK_HIGH_STROMAL_CELL	Patient 2_Preinfusion, Patient 4_Peak	3.38904238609563, 2.84172334875877
C1	FAN_OVARY_CL10_PUTATIVE_EARLY_ATRESIA_GRANULOSA_CELL	Patient 2_Peak2, Patient 4_Peak	2.76191443921397, 1.98965410439054
C1	FAN_OVARY_CL14_MATURE_SMOOTH_MUSCLE_CELL	Patient 4_Peak, Patient 4_Peak CAR T	1.89604099180698, 2.07028586376905
C1	FAN_OVARY_CL16_LYMPHATIC_ENDOTHELIAL_CELL	Patient 1_Preinfusion, Patient 4_Peak CAR T	1.78355273528597, 2.10580120801807
C1	FREAC2_01	Patient 1_Preinfusion, Patient 4_Peak CAR T	1.94112003070704, 2.11250087373162
C1	FULLER_PBMC_F_TULARENSIS_VACCINE_LVS_AGE_22_54YO_48HR_UP	Patient 2_Day 24 CART, Patient 3_Peak CAR T	1.41896559664717, 1.62802427682506
C1	GAO_ESOPHAGUS_25W_C2_KRT6BPOS_SECRETORY_PROGENITOR_CELLS	Patient 3_Peak CAR T, Patient 4_Peak CAR T	1.32376727067, 1.62820386754865
C1	GAO_LARGE_INTESTINE_ADULT_CA_ENTEROENDOCRINE_CELLS	Patient 3_Preinfusion, Patient 4_Peak CAR T	1.83806725791614, 1.96707585403914
C1	GAO_STOMACH_24W_C4_PARIETAL_PROGENITOR	Patient 1_Preinfusion, Patient 3_Peak CAR T	1.32360080807767, 1.32620514777989
C1	GAUCHER_PBMC_YF_VAX_STAMARIL_UNKNOWN_AGE_28DY_UP	Patient 1_Preinfusion, Patient 4_Peak CAR T	2.08998736447791, 1.7164626988468
C1	GAUCHER_PBMC_YF_VAX_STAMARIL_UNKNOWN_AGE_3DY_DN	Patient 2_Preinfusion, Patient 4_Peak	2.84430133657382, 2.07160611852201
C1	GAUCHER_PBMC_YF_VAX_STAMARIL_UNKNOWN_AGE_7DY_DN	Patient 2_Preinfusion, Patient 4_Peak	3.23977445139748, 2.39823728449576
C1	GCM_TPT1	Patient 2_Preinfusion, Patient 4_Peak	3.51470274553379, 3.09262608130027
C1	GNF2_CD33	Patient 1_Preinfusion, Patient 4_Peak CAR T	1.77410903428967, 2.03563661255182
C1	GNF2_CD48	Patient 1_Preinfusion, Patient 2_Preinfusion	2.79489572153373, 2.25819129264927
C1	GNF2_DDX5	Patient 2_Preinfusion, Patient 4_Peak CAR T	2.02481229585375, 1.60061018099114
C1	GNF2_EIF3S6	Patient 2_Preinfusion, Patient 4_Peak	3.23296212014312, 3.13912790541043
C1	GNF2_INPP5D	Patient 1_Preinfusion, Patient 2_Preinfusion	2.20921157954874, 2.09457237124442
C1	GNF2_ST13	Patient 2_Preinfusion, Patient 4_Peak	2.26422152397877, 2.84663428512419
C1	GNF2_TPT1	Patient 2_Preinfusion, Patient 4_Peak	3.88541156184296, 3.14207701317485
C1	GOBP_ALPHA_BETA_T_CELL_PROLIFERATION	Patient 1_Preinfusion, Patient 2_Preinfusion	2.06239590432116, 2.28432936479608
C1	GOBP_ANTIGEN_PROCESSING_AND_PRESENTATION_OF_ENDOGENOUS_ANTIGEN	Patient 1_Preinfusion, Patient 2_Day 24 CART	2.57544540721756, 1.40441200862498
C1	GOBP_ANTIGEN_PROCESSING_AND_PRESENTATION_OF_PEPTIDE_ANTIGEN_VIA_MHC_CLASS_IB	Patient 1_Preinfusion, Patient 2_Day 24 CART	1.89436729987924, 1.40441200862498
C1	GOBP_ANTIGEN_PROCESSING_AND_PRESENTATION_VIA_MHC_CLASS_IB	Patient 1_Preinfusion, Patient 2_Day 24 CART	1.89436729987924, 1.40441200862498
C1	GOBP_BIOLOGICAL_ADHESION	Patient 1_Preinfusion, Patient 4_Peak CAR T	2.63214243608167, 1.98931924861807
C1	GOBP_CELL_CELL_ADHESION	Patient 1_Preinfusion, Patient 4_Peak CAR T	2.85180779530418, 1.90207842724859
C1	GOBP_CELL_CELL_SIGNALING	Patient 1_Preinfusion, Patient 1_Product	1.68648011274851, 2.01571717404025
C1	GOBP_CELL_KILLING	Patient 1_Preinfusion, Patient 2_Day 24 CART	2.25970223376815, 1.40441200862498
C1	GOBP_CYTOKINE_PRODUCTION	Patient 1_Preinfusion, Patient 4_Peak CAR T	1.71932576797342, 1.83552890319011
C1	GOBP_CYTOKINE_PRODUCTION_INVOLVED_IN_IMMUNE_RESPONSE	Patient 1_Preinfusion, Patient 2_Day 24 CART	2.44800683082377, 1.40441200862498
C1	GOBP_ESTABLISHMENT_OF_PROTEIN_LOCALIZATION_TO_ENDOPLASMIC_RETICULUM	Patient 2_Preinfusion, Patient 4_Peak	4.12393379202188, 3.69173849347376
C1	GOBP_GRANULOCYTE_CHEMOTAXIS	Patient 1_Product, Patient 3_Product	2.17166160285532, 1.83298913558341
C1	GOBP_GRANULOCYTE_MIGRATION	Patient 1_Product, Patient 3_Product	2.17166160285532, 1.83298913558341
C1	GOBP_INTERFERON_GAMMA_MEDIATED_SIGNALING_PATHWAY	Patient 1_Preinfusion, Patient 2_Day 24 CART	2.96853773185396, 1.40441200862498
C1	GOBP_LEUKOCYTE_CELL_CELL_ADHESION	Patient 1_Preinfusion, Patient 4_Peak CAR T	2.72196971765838, 1.84290475359721
C1	GOBP_LOCOMOTION	Patient 1_Preinfusion, Patient 4_Peak CAR T	2.43474250543377, 1.96484152544546
C1	GOBP_LYMPHOCYTE_MEDIATED_IMMUNITY	Patient 1_Preinfusion, Patient 2_Day 24 CART	2.01812104814193, 1.40441200862498
C1	GOBP_MACROPHAGE_CHEMOTAXIS	Patient 1_Preinfusion, Patient 1_Product	1.33338932562245, 1.66819359271511
C1	GOBP_MACROPHAGE_MIGRATION	Patient 1_Preinfusion, Patient 1_Product	1.33338932562245, 1.66819359271511
C1	GOBP_MONONUCLEAR_CELL_DIFFERENTIATION	Patient 1_Preinfusion, Patient 4_Peak CAR T	1.84074872409639, 1.95037976438462
C1	GOBP_MONONUCLEAR_CELL_MIGRATION	Patient 1_Product, Patient 4_Peak CAR T	2.05599500904871, 2.17380336566907
C1	GOBP_MYD88_INDEPENDENT_TOLL_LIKE_RECEPTOR_SIGNALING_PATHWAY	Patient 2_Preinfusion, Patient 3_Preinfusion	2.09480765561684, 1.65016811195944
C1	GOBP_NEGATIVE_REGULATION_BY_HOST_OF_VIRAL_TRANSCRIPTION	Patient 1_Product, Patient 3_Product	1.87785073163219, 1.83298913558341
C1	GOBP_NEGATIVE_REGULATION_OF_IMMUNE_RESPONSE	Patient 1_Preinfusion, Patient 4_Preinfusion	2.68170130642709, 2.22588409601091
C1	GOBP_NEGATIVE_REGULATION_OF_INNATE_IMMUNE_RESPONSE	Patient 1_Preinfusion, Patient 4_Preinfusion	2.53593600530524, 2.3448574889544
C1	GOBP_NEGATIVE_REGULATION_OF_LEUKOCYTE_MEDIATED_CYTOTOXICITY	Patient 1_Preinfusion, Patient 4_Peak CAR T	2.4207637795441, 1.78891963467102
C1	GOBP_NEGATIVE_REGULATION_OF_LYMPHOCYTE_MEDIATED_IMMUNITY	Patient 1_Preinfusion, Patient 4_Peak CAR T	2.39326509664026, 1.95929199572664
C1	GOBP_NEGATIVE_REGULATION_OF_MULTICELLULAR_ORGANISMAL_PROCESS	Patient 1_Preinfusion, Patient 4_Peak CAR T	1.82895054696987, 1.69001632959464
C1	GOBP_NEGATIVE_REGULATION_OF_NEURON_DIFFERENTIATION	Patient 1_Preinfusion, Patient 2_Day 24 CART	1.62935323140323, 1.40441200862498
C1	GOBP_NEGATIVE_REGULATION_OF_RESPONSE_TO_EXTERNAL_STIMULUS	Patient 1_Preinfusion, Patient 4_Preinfusion	2.06004104911283, 2.54227462563475
C1	GOBP_NEGATIVE_REGULATION_OF_T_CELL_MEDIATED_CYTOTOXICITY	Patient 1_Preinfusion, Patient 4_Peak CAR T	1.60787905372411, 1.33305981999442
C1	GOBP_NEGATIVE_REGULATION_OF_T_CELL_MEDIATED_IMMUNITY	Patient 1_Preinfusion, Patient 4_Peak CAR T	1.87764922111582, 1.61566078476902
C1	GOBP_NEGATIVE_REGULATION_OF_VIRAL_GENOME_REPLICATION	Patient 1_Preinfusion, Patient 1_Product	2.18918337906107, 1.89940985943568
C1	GOBP_NEGATIVE_REGULATION_OF_VIRAL_LIFE_CYCLE	Patient 1_Day 7, Patient 4_Peak CAR T	2.18649172982253, 1.93473710556435
C1	GOBP_NEUTROPHIL_CHEMOTAXIS	Patient 1_Product, Patient 3_Product	2.16642719847527, 1.83298913558341
C1	GOBP_NEUTROPHIL_MIGRATION	Patient 1_Product, Patient 3_Product	2.16642719847527, 1.83298913558341
C1	GOBP_NUCLEAR_TRANSCRIBED_MRNA_CATABOLIC_PROCESS_NONSENSE_MEDIATED_DECAY	Patient 2_Preinfusion, Patient 4_Peak	3.8459150891044, 3.23791119658311
C1	GOBP_PEROXISOMAL_TRANSPORT	Patient 1_Peak CAR T, Patient 4_Peak	2.21125204449801, 2.01309759198142
C1	GOBP_PEROXISOME_ORGANIZATION	Patient 1_Peak CAR T, Patient 4_Peak	2.21125204449801, 2.01309759198142
C1	GOBP_POSITIVE_REGULATION_OF_CELL_DEATH	Patient 1_Preinfusion, Patient 4_Peak CAR T	1.64390546397974, 1.79652917177863
C1	GOBP_POSITIVE_REGULATION_OF_INFLAMMATORY_RESPONSE	Patient 1_Preinfusion, Patient 2_Preinfusion	2.38492607499083, 2.13475933073564
C1	GOBP_POSITIVE_REGULATION_OF_LEUKOCYTE_MEDIATED_IMMUNITY	Patient 1_Preinfusion, Patient 4_Peak CAR T	1.94204690058858, 1.93694149067335
C1	GOBP_POSITIVE_REGULATION_OF_LYMPHOCYTE_APOPTOTIC_PROCESS	Patient 1_Preinfusion, Patient 3_Preinfusion	1.7813763389862, 1.69082006362267
C1	GOBP_POSITIVE_REGULATION_OF_MACROPHAGE_MIGRATION	Patient 1_Preinfusion, Patient 1_Product	1.33338932562245, 1.66819359271511
C1	GOBP_POSITIVE_REGULATION_OF_PRODUCTION_OF_MOLECULAR_MEDIATOR_OF_IMMUNE_RESPONSE	Patient 1_Preinfusion, Patient 2_Day 24 CART	1.96924453540639, 1.40441200862498
C1	GOBP_POSITIVE_REGULATION_OF_RHO_PROTEIN_SIGNAL_TRANSDUCTION	Patient 1_Preinfusion, Patient 4_Peak CAR T	1.83909304240847, 1.83628420742875
C1	GOBP_POSITIVE_REGULATION_OF_T_CELL_MEDIATED_CYTOTOXICITY	Patient 1_Preinfusion, Patient 2_Day 24 CART	2.4207637795441, 1.40441200862498
C1	GOBP_PROGRAMMED_NECROTIC_CELL_DEATH	Patient 1_Preinfusion, Patient 2_Preinfusion	2.03124054884716, 2.22454416594149
C1	GOBP_PROTECTION_FROM_NATURAL_KILLER_CELL_MEDIATED_CYTOTOXICITY	Patient 1_Preinfusion, Patient 2_Preinfusion	1.82018082536659, 1.90229862112045
C1	GOBP_PROTEIN_LOCALIZATION_TO_ENDOPLASMIC_RETICULUM	Patient 2_Preinfusion, Patient 4_Peak	3.98193029504741, 3.67400235117797
C1	GOBP_PROTEIN_TARGETING_TO_MEMBRANE	Patient 2_Preinfusion, Patient 4_Peak	4.10978614996644, 3.67841189054938
C1	GOBP_REGULATION_OF_ADAPTIVE_IMMUNE_RESPONSE	Patient 1_Preinfusion, Patient 2_Day 24 CART	2.1628825741696, 1.40441200862498
C1	GOBP_REGULATION_OF_CELL_ADHESION	Patient 1_Preinfusion, Patient 4_Peak CAR T	2.47976927476726, 1.78631707174734
C1	GOBP_REGULATION_OF_CELL_CELL_ADHESION	Patient 1_Preinfusion, Patient 4_Peak CAR T	2.60227250441428, 1.88713172634042
C1	GOBP_REGULATION_OF_DEFENSE_RESPONSE	Patient 1_Preinfusion, Patient 4_Preinfusion	1.97469859062977, 2.05302882499071
C1	GOBP_REGULATION_OF_IMMUNE_EFFECTOR_PROCESS	Patient 1_Preinfusion, Patient 4_Peak CAR T	2.01353553501447, 1.87060169728383
C1	GOBP_REGULATION_OF_LEUKOCYTE_APOPTOTIC_PROCESS	Patient 1_Preinfusion, Patient 3_Preinfusion	2.12014629757054, 2.15996143122986
C1	GOBP_REGULATION_OF_LYMPHOCYTE_ACTIVATION	Patient 1_Preinfusion, Patient 4_Peak CAR T	2.39566174640726, 1.89774629649433
C1	GOBP_REGULATION_OF_MACROPHAGE_MIGRATION	Patient 1_Preinfusion, Patient 1_Product	1.33338932562245, 1.66819359271511
C1	GOBP_REGULATION_OF_METAL_ION_TRANSPORT	Patient 1_Preinfusion, Patient 1_Product	1.95456917455257, 2.17869145620983
C1	GOBP_REGULATION_OF_MULTICELLULAR_ORGANISMAL_DEVELOPMENT	Patient 1_Preinfusion, Patient 4_Peak CAR T	1.85712215259198, 1.62811264633257
C1	GOBP_REGULATION_OF_NATURAL_KILLER_CELL_ACTIVATION	Patient 1_Preinfusion, Patient 4_Peak CAR T	1.94126217094627, 1.98641422594174
C1	GOBP_REGULATION_OF_NATURAL_KILLER_CELL_MEDIATED_IMMUNITY	Patient 1_Preinfusion, Patient 3_Preinfusion	2.36697190460283, 2.12077778324268
C1	GOBP_REGULATION_OF_PHOSPHOLIPASE_ACTIVITY	Patient 3_Peak, Patient 3_Peak CAR T	1.68393451984436, 1.72273954740348
C1	GOBP_REGULATION_OF_PRODUCTION_OF_MOLECULAR_MEDIATOR_OF_IMMUNE_RESPONSE	Patient 1_Preinfusion, Patient 2_Day 24 CART	1.94419758651778, 1.40441200862498
C1	GOBP_REGULATION_OF_RESPONSE_TO_EXTERNAL_STIMULUS	Patient 1_Preinfusion, Patient 3_Product	2.1117192043117, 2.08786541315493
C1	GOBP_REGULATION_OF_T_CELL_ACTIVATION	Patient 1_Preinfusion, Patient 4_Peak CAR T	2.40529575780217, 1.84601891939757
C1	GOBP_REGULATION_OF_T_CELL_MEDIATED_IMMUNITY	Patient 2_Day 24 CART, Patient 4_Peak CAR T	1.40441200862498, 1.97769249150255
C1	GOBP_REGULATION_OF_TUMOR_NECROSIS_FACTOR_MEDIATED_SIGNALING_PATHWAY	Patient 1_Preinfusion, Patient 2_Preinfusion	2.03717113186419, 2.69485876273056
C1	GOBP_RESPIRATORY_BURST	Patient 4_Peak, Patient 4_Peak CAR T	2.13596907890195, 1.99543234063165
C1	GOBP_RESPONSE_TO_INTERLEUKIN_1	Patient 1_Product, Patient 3_Peak	2.03611510322746, 2.37465624925299
C1	GOBP_RIBOSOMAL_LARGE_SUBUNIT_BIOGENESIS	Patient 1_Day 7, Patient 4_Peak	2.32385780732081, 2.13973796497644
C1	GOBP_T_CELL_CYTOKINE_PRODUCTION	Patient 1_Preinfusion, Patient 2_Day 24 CART	1.84316818366628, 1.40441200862498
C1	GOBP_T_CELL_MIGRATION	Patient 1_Preinfusion, Patient 4_Peak CAR T	2.09443901564387, 1.9533412020569
C1	GOBP_TRANSLATIONAL_INITIATION	Patient 2_Preinfusion, Patient 4_Peak	3.77997108567718, 3.07992148590865
C1	GOCC_ADHERENS_JUNCTION	Patient 1_Preinfusion, Patient 1_Preinfusion	1.9756591138121, 1.95346934462285
C1	GOCC_AZUROPHIL_GRANULE_MEMBRANE	Patient 1_Preinfusion, Patient 1_Preinfusion	2.46948749631593, 2.43468176768294
C1	GOCC_CELL_SUBSTRATE_JUNCTION	Patient 4_Peak, Patient 4_Peak	1.90586088167579, 1.88408955938725
C1	GOCC_CLATHRIN_COATED_VESICLE_MEMBRANE	Patient 1_Preinfusion, Patient 1_Preinfusion	2.1915114408176, 2.17686087020878
C1	GOCC_CLATHRIN_SCULPTED_GAMMA_AMINOBUTYRIC_ACID_TRANSPORT_VESICLE	Patient 1_Preinfusion, Patient 1_Preinfusion	1.60966856853071, 1.60961899884027
C1	GOCC_CLATHRIN_SCULPTED_VESICLE	Patient 1_Preinfusion, Patient 1_Preinfusion	1.60966856853071, 1.60961899884027
C1	GOCC_DESMOSOME	Patient 1_Preinfusion, Patient 1_Preinfusion	1.62130041477356, 1.62125048688081
C1	GOCC_EARLY_ENDOSOME	Patient 1_Preinfusion, Patient 1_Preinfusion	1.96717280153433, 1.95042387371531
C1	GOCC_ENDOPLASMIC_RETICULUM	Patient 4_Peak, Patient 4_Peak	1.87219327094225, 1.84326540047775
C1	GOCC_ENDOPLASMIC_RETICULUM_PROTEIN_CONTAINING_COMPLEX	Patient 2_Day 24 CART, Patient 2_Day 24 CART	1.41652337300006, 1.40441200862498
C1	GOCC_FICOLIN_1_RICH_GRANULE_MEMBRANE	Patient 1_Preinfusion, Patient 1_Preinfusion	2.11037223522629, 2.09068003085026
C1	GOCC_HFE_TRANSFERRIN_RECEPTOR_COMPLEX	Patient 2_Day 24 CART, Patient 2_Day 24 CART	1.41652337300006, 1.40441200862498
C1	GOCC_IMMUNOLOGICAL_SYNAPSE	Patient 1_Preinfusion, Patient 1_Preinfusion	2.41661124130313, 2.37330452084477
C1	GOCC_LATE_ENDOSOME	Patient 1_Preinfusion, Patient 1_Preinfusion	2.24598000386988, 2.22740260978806
C1	GOCC_MULTIVESICULAR_BODY	Patient 1_Preinfusion, Patient 1_Preinfusion	1.92564896641633, 1.90155026387502
C1	GOCC_ORGANELLE_SUBCOMPARTMENT	Patient 1_Preinfusion, Patient 1_Preinfusion	1.67882256645907, 1.66759202311545
C1	GOCC_PLASMA_MEMBRANE_REGION	Patient 1_Preinfusion, Patient 1_Preinfusion	1.70090698845687, 1.69003098360847
C1	GOCC_POSTSYNAPTIC_MEMBRANE	Patient 1_Preinfusion, Patient 1_Preinfusion	2.03484412894951, 1.99837884054787
C1	GOCC_SNARE_COMPLEX	Patient 1_Preinfusion, Patient 1_Preinfusion	1.91179032885296, 1.89985073749874
C1	GOCC_SPECIFIC_GRANULE_LUMEN	Patient 2_Day 24 CART, Patient 2_Day 24 CART	1.41652337300006, 1.40441200862498
C1	GOCC_SPECIFIC_GRANULE_MEMBRANE	Patient 1_Preinfusion, Patient 1_Preinfusion	2.05098928879591, 2.03974025941219
C1	GOCC_SYNAPTIC_MEMBRANE	Patient 1_Preinfusion, Patient 1_Preinfusion	2.18208693987576, 2.15926507999985
C1	GOCC_TERTIARY_GRANULE_LUMEN	Patient 2_Day 24 CART, Patient 2_Day 24 CART	1.41652337300006, 1.40441200862498
C1	GOMF_5S_RRNA_BINDING	Patient 2_Preinfusion, Patient 2_Preinfusion	2.08287601854534, 2.07508027555105
C1	GOMF_BETA_2_MICROGLOBULIN_BINDING	Patient 1_Preinfusion, Patient 1_Preinfusion	1.84580318925274, 1.84316818366628
C1	GOMF_CALCIUM_ION_BINDING	Patient 1_Preinfusion, Patient 1_Preinfusion	1.96045621343421, 1.92450216364943
C1	GOMF_CALMODULIN_BINDING	Patient 1_Preinfusion, Patient 1_Preinfusion	2.08353792324288, 2.07636452212888
C1	GOMF_CIS_REGULATORY_REGION_SEQUENCE_SPECIFIC_DNA_BINDING	Patient 4_Peak CAR T, Patient 4_Peak CAR T	1.80715032602843, 1.80083362158098
C1	GOMF_CYSTEINE_TYPE_ENDOPEPTIDASE_ACTIVITY_INVOLVED_IN_APOPTOTIC_SIGNALING_PATHWAY	Patient 1_Preinfusion, Patient 1_Preinfusion	1.63727401657233, 1.63651129062961
C1	GOMF_CYTOKINE_ACTIVITY	Patient 1_Product, Patient 1_Product	2.36165875700054, 2.36004022451699
C1	GOMF_ICOSANOID_RECEPTOR_ACTIVITY	Patient 4_Peak CAR T, Patient 4_Peak CAR T	1.79099265533049, 1.7881999992163
C1	GOMF_IMMUNOGLOBULIN_RECEPTOR_BINDING	Patient 1_Preinfusion, Patient 1_Preinfusion	1.66233890036896, 1.66156449792191
C1	GOMF_LIPASE_ACTIVITY	Patient 1_Preinfusion, Patient 1_Preinfusion	1.33338932562245, 1.33226872016808
C1	GOMF_MHC_CLASS_IB_RECEPTOR_ACTIVITY	Patient 4_Peak CAR T, Patient 4_Peak CAR T	1.33305981999442, 1.33133466490003
C1	GOMF_MHC_CLASS_II_PROTEIN_BINDING	Patient 1_Preinfusion, Patient 1_Preinfusion	1.6336933188871, 1.63293226101642
C1	GOMF_PHOSPHATIDYLINOSITOL_BINDING	Patient 1_Preinfusion, Patient 1_Preinfusion	2.03292649688899, 2.0152191152154
C1	GOMF_PHOSPHOLIPASE_ACTIVITY	Patient 1_Preinfusion, Patient 1_Preinfusion	1.33338932562245, 1.33226872016808
C1	GOMF_PHOSPHOLIPASE_C_ACTIVITY	Patient 1_Preinfusion, Patient 1_Preinfusion	1.33338932562245, 1.33226872016808
C1	GOMF_PROSTANOID_RECEPTOR_ACTIVITY	Patient 4_Peak CAR T, Patient 4_Peak CAR T	1.79099265533049, 1.7881999992163
C1	GOMF_PROTEIN_DIMERIZATION_ACTIVITY	Patient 1_Preinfusion, Patient 2_Day 24 CART	1.58508628327793, 1.74398597866744
C1	GOMF_PROTEIN_HOMODIMERIZATION_ACTIVITY	Patient 1_Preinfusion, Patient 1_Preinfusion	1.94942388908335, 1.91902434425892
C1	GOMF_PROTEIN_TYROSINE_KINASE_ACTIVATOR_ACTIVITY	Patient 1_Preinfusion, Patient 1_Preinfusion	1.33338932562245, 1.33226872016808
C1	GOMF_R_SMAD_BINDING	Patient 4_Peak CAR T, Patient 4_Peak CAR T	1.82971621097043, 1.81712507728673
C1	GOMF_RECEPTOR_ANTAGONIST_ACTIVITY	Patient 1_Preinfusion, Patient 1_Preinfusion	1.33338932562245, 1.33226872016808
C1	GOMF_RECEPTOR_REGULATOR_ACTIVITY	Patient 1_Product, Patient 1_Product	2.08107160575474, 2.06201816323236
C1	GOMF_STRUCTURAL_MOLECULE_ACTIVITY	Patient 4_Peak, Patient 4_Peak	2.58477251571076, 2.55410633114175
C1	GOMF_SULFOTRANSFERASE_ACTIVITY	Patient 4_Peak CAR T, Patient 4_Peak CAR T	1.64512724971166, 1.64321866408083
C1	GOMF_T_CELL_RECEPTOR_BINDING	Patient 3_Preinfusion, Patient 3_Preinfusion	2.06091859762669, 2.04842478922977
C1	GOMF_TAP_BINDING	Patient 1_Preinfusion, Patient 1_Preinfusion	2.24597029980025, 2.24416358009559
C1	GOMF_TRANSCRIPTION_REGULATOR_ACTIVITY	Patient 4_Peak CAR T, Patient 4_Peak CAR T	1.7617912098256, 1.75981553174248
C1	GSE10239_NAIVE_VS_DAY4.5_EFF_CD8_TCELL_UP	Patient 1_Peak CAR T, Patient 2_Preinfusion	2.06303289791883, 2.60599841507692
C1	GSE10239_NAIVE_VS_KLRG1INT_EFF_CD8_TCELL_UP	Patient 2_Preinfusion, Patient 4_Peak CAR T	2.2261083913605, 1.65127941702728
C1	GSE10325_LUPUS_BCELL_VS_LUPUS_MYELOID_DN	Patient 4_Peak CAR T, Patient 4_Preinfusion	2.13744615470099, 2.10307181180985
C1	GSE11057_NAIVE_CD4_VS_PBMC_CD4_TCELL_DN	Patient 1_Preinfusion, Patient 4_Peak CAR T	2.12996054302774, 1.64381050580766
C1	GSE11057_PBMC_VS_MEM_CD4_TCELL_UP	Patient 3_Preinfusion, Patient 4_Peak CAR T	2.09260388567386, 1.69324387828216
C1	GSE11924_TFH_VS_TH1_CD4_TCELL_UP	Patient 1_Peak CAR T, Patient 1_Preinfusion	1.84987700365912, 2.0886701910724
C1	GSE11924_TH1_VS_TH17_CD4_TCELL_UP	Patient 1_Preinfusion, Patient 2_Day 24 CART	2.03868235790053, 1.41099291587891
C1	GSE11961_GERMINAL_CENTER_BCELL_DAY7_VS_MEMORY_BCELL_DAY40_UP	Patient 1_Preinfusion, Patient 4_Peak CAR T	1.86915319646612, 1.68000559931336
C1	GSE11961_MEMORY_BCELL_DAY7_VS_PLASMA_CELL_DAY7_DN	Patient 1_Peak CAR T, Patient 4_Peak CAR T	1.87825428802355, 1.69370713459874
C1	GSE11961_UNSTIM_VS_ANTI_IGM_AND_CD40_STIM_6H_FOLLICULAR_BCELL_DN	Patient 2_Preinfusion, Patient 4_Peak CAR T	1.8009902307866, 1.7060673296568
C1	GSE12366_GC_BCELL_VS_PLASMA_CELL_DN	Patient 1_Preinfusion, Patient 4_Peak CAR T	2.05375005890822, 1.82479725089059
C1	GSE12505_WT_VS_E2_2_HET_PDC_DN	Patient 2_Preinfusion, Patient 4_Peak CAR T	2.17874176853792, 1.71263784924804
C1	GSE12707_AT16L1_HYPOMORPH_VS_WT_THYMUS_DN	Patient 1_Preinfusion, Patient 3_Preinfusion	1.75282472807484, 2.10219982500815
C1	GSE12845_IGD_NEG_BLOOD_VS_DARKZONE_GC_TONSIL_BCELL_UP	Patient 1_Preinfusion, Patient 4_Peak CAR T	1.97006592463526, 1.82808807340464
C1	GSE12845_IGD_POS_BLOOD_VS_PRE_GC_TONSIL_BCELL_UP	Patient 2_Preinfusion, Patient 4_Peak CAR T	2.14659268913183, 1.89162358454245
C1	GSE12845_IGD_POS_VS_NEG_BLOOD_BCELL_UP	Patient 2_Preinfusion, Patient 4_Peak CAR T	2.0434919489406, 1.89943793182286
C1	GSE12963_UNINF_VS_ENV_AND_NEF_DEFICIENT_HIV1_INF_CD4_TCELL_UP	Patient 2_Preinfusion, Patient 4_Peak CAR T	1.82512695776424, 1.71141746755529
C1	GSE13229_IMM_VS_INTMATURE_NKCELL_DN	Patient 1_Preinfusion, Patient 4_Peak CAR T	1.7990564609942, 1.63569353413782
C1	GSE13229_IMM_VS_MATURE_NKCELL_DN	Patient 1_Preinfusion, Patient 4_Peak CAR T	1.90115581510944, 1.64698858143102
C1	GSE13306_RA_VS_UNTREATED_MEM_CD4_TCELL_UP	Patient 1_Preinfusion, Patient 4_Peak CAR T	1.8138233443209, 1.88518023266509
C1	GSE13485_CTRL_VS_DAY3_YF17D_VACCINE_PBMC_UP	Patient 2_Preinfusion, Patient 4_Peak CAR T	2.01186959367987, 1.68655861705455
C1	GSE13485_PRE_VS_POST_YF17D_VACCINATION_PBMC_UP	Patient 2_Preinfusion, Patient 4_Peak CAR T	2.43925157651194, 1.84318191418347
C1	GSE13493_DP_VS_CD4INTCD8POS_THYMOCYTE_UP	Patient 2_Preinfusion, Patient 4_Peak CAR T	2.24204524804747, 1.68653291134187
C1	GSE13547_WT_VS_ZFX_KO_BCELL_ANTI_IGM_STIM_2H_DN	Patient 2_Preinfusion, Patient 4_Peak CAR T	2.27851557174359, 1.81924141383845
C1	GSE13738_RESTING_VS_TCR_ACTIVATED_CD4_TCELL_UP	Patient 2_Preinfusion, Patient 4_Peak CAR T	2.0066421131738, 1.64636189091443
C1	GSE14000_TRANSLATED_RNA_VS_MRNA_DC_DN	Patient 2_Preinfusion, Patient 4_Peak	2.19385529569719, 2.70290656908014
C1	GSE14000_UNSTIM_VS_4H_LPS_DC_DN	Patient 1_Preinfusion, Patient 4_Peak CAR T	3.17499337481137, 1.61764114615946
C1	GSE14000_UNSTIM_VS_4H_LPS_DC_TRANSLATED_RNA_DN	Patient 1_Peak CAR T, Patient 1_Preinfusion	1.99474247426768, 3.24592691616805
C1	GSE14308_NAIVE_CD4_TCELL_VS_INDUCED_TREG_UP	Patient 2_Day 24 CART, Patient 2_Preinfusion	1.41099291587891, 1.73726246580083
C1	GSE14308_TH2_VS_TH1_DN	Patient 1_Preinfusion, Patient 4_Peak CAR T	2.20263224306465, 1.74355624633402
C1	GSE1432_1H_VS_6H_IFNG_MICROGLIA_DN	Patient 1_Peak CAR T, Patient 1_Preinfusion	1.97697868948745, 1.65981669332843
C1	GSE1432_CTRL_VS_IFNG_6H_MICROGLIA_DN	Patient 1_Peak CAR T, Patient 1_Preinfusion	2.30861580593484, 1.74883083683571
C1	GSE14386_UNTREATED_VS_IFNA_TREATED_ACT_PBMC_MS_PATIENT_UP	Patient 1_Preinfusion, Patient 4_Peak CAR T	1.7797951864857, 1.71702385210914
C1	GSE14415_INDUCED_TREG_VS_FAILED_INDUCED_TREG_DN	Patient 1_Preinfusion, Patient 4_Peak CAR T	1.71952393397098, 1.75209572671826
C1	GSE14415_INDUCED_TREG_VS_TCONV_DN	Patient 1_Preinfusion, Patient 2_Preinfusion	1.78626478237212, 2.28305988576384
C1	GSE14415_NATURAL_TREG_VS_TCONV_UP	Patient 1_Preinfusion, Patient 2_Preinfusion	2.11824848901815, 2.73587556596658
C1	GSE1460_DP_THYMOCYTE_VS_NAIVE_CD4_TCELL_ADULT_BLOOD_DN	Patient 2_Preinfusion, Patient 4_Peak CAR T	3.45594493913091, 1.67845081789563
C1	GSE1460_DP_VS_CD4_THYMOCYTE_DN	Patient 2_Preinfusion, Patient 4_Peak CAR T	2.70018383978767, 1.98788974589102
C1	GSE14769_UNSTIM_VS_120MIN_LPS_BMDM_DN	Patient 1_Preinfusion, Patient 4_Peak CAR T	1.75120383407835, 1.61508552841759
C1	GSE14769_UNSTIM_VS_20MIN_LPS_BMDM_DN	Patient 1_Preinfusion, Patient 4_Peak CAR T	1.77673664791656, 1.65158824288633
C1	GSE14769_UNSTIM_VS_40MIN_LPS_BMDM_DN	Patient 1_Preinfusion, Patient 4_Peak CAR T	1.80980645021056, 2.33046290481598
C1	GSE14769_UNSTIM_VS_60MIN_LPS_BMDM_DN	Patient 1_Preinfusion, Patient 4_Peak CAR T	2.32897299257624, 2.18392059598304
C1	GSE14908_RESTING_VS_HDM_STIM_CD4_TCELL_NONATOPIC_PATIENT_DN	Patient 1_Preinfusion, Patient 4_Peak CAR T	1.90732379347583, 1.78062583532589
C1	GSE15324_NAIVE_VS_ACTIVATED_CD8_TCELL_UP	Patient 1_Preinfusion, Patient 1_Product	1.7339733008734, 1.8576505071505
C1	GSE15624_3H_VS_6H_HALOFUGINONE_TREATED_CD4_TCELL_UP	Patient 1_Preinfusion, Patient 4_Peak CAR T	2.19051304751852, 1.70584420889941
C1	GSE15659_CD45RA_NEG_CD4_TCELL_VS_NONSUPPRESSIVE_TCELL_UP	Patient 2_Preinfusion, Patient 4_Peak CAR T	1.8468834253538, 1.83976529342991
C1	GSE15930_STIM_VS_STIM_AND_TRICHOSTATINA_48H_CD8_T_CELL_DN	Patient 1_Preinfusion, Patient 2_Day 24 CART	1.9243206193434, 1.41099291587891
C1	GSE16385_MONOCYTE_VS_12H_ROSIGLITAZONE_IFNG_TNF_TREATED_MACROPHAGE_DN	Patient 2_Preinfusion, Patient 4_Peak CAR T	1.78998617474702, 1.68300724730263
C1	GSE16385_ROSIGLITAZONE_IFNG_TNF_VS_IL4_STIM_MACROPHAGE_UP	Patient 2_Preinfusion, Patient 4_Peak CAR T	1.81462897860892, 2.92862395586464
C1	GSE16385_ROSIGLITAZONE_IL4_VS_IL4_ALONE_STIM_MACROPHAGE_12H_DN	Patient 1_Preinfusion, Patient 4_Peak CAR T	1.98055621060004, 2.03286530806221
C1	GSE16385_ROSIGLITAZONE_VS_UNTREATED_IFNG_TNF_STIM_MACROPHAGE_UP	Patient 1_Preinfusion, Patient 2_Day 24 CART	1.8287330435765, 1.41099291587891
C1	GSE16450_IMMATURE_VS_MATURE_NEURON_CELL_LINE_6H_IFNA_STIM_UP	Patient 1_Peak CAR T, Patient 1_Preinfusion	1.73727185589614, 2.06869076595901
C1	GSE16451_CTRL_VS_WEST_EQUINE_ENC_VIRUS_MATURE_NEURON_CELL_LINE_DN	Patient 1_Preinfusion, Patient 4_Peak CAR T	1.83237667650473, 1.65505816793245
C1	GSE17186_NAIVE_VS_CD21LOW_TRANSITIONAL_BCELL_UP	Patient 1_Preinfusion, Patient 4_Peak CAR T	1.7267459974873, 2.10559317994992
C1	GSE17580_TREG_VS_TEFF_DN	Patient 1_Peak CAR T, Patient 3_Preinfusion	2.26360653189334, 1.97454737081405
C1	GSE17721_0.5H_VS_24H_POLYIC_BMDC_DN	Patient 1_Preinfusion, Patient 4_Peak CAR T	2.02110548765373, 1.79447495926541
C1	GSE17721_0.5H_VS_8H_CPG_BMDC_DN	Patient 1_Peak CAR T, Patient 4_Peak CAR T	1.84894621044623, 1.62632010924761
C1	GSE17721_CTRL_VS_GARDIQUIMOD_8H_BMDC_DN	Patient 1_Preinfusion, Patient 1_Product	1.78345929292374, 1.75988906617914
C1	GSE17721_CTRL_VS_POLYIC_1H_BMDC_DN	Patient 2_Day 24 CART, Patient 4_Peak CAR T	1.41099291587891, 1.71777539200985
C1	GSE17721_PAM3CSK4_VS_CPG_12H_BMDC_DN	Patient 1_Preinfusion, Patient 2_Day 24 CART	2.08381179688953, 1.41099291587891
C1	GSE17721_POLYIC_VS_CPG_1H_BMDC_DN	Patient 1_Preinfusion, Patient 2_Preinfusion	1.87345824317362, 2.42359671539168
C1	GSE17721_POLYIC_VS_GARDIQUIMOD_16H_BMDC_UP	Patient 1_Preinfusion, Patient 4_Peak CAR T	1.68888062170982, 2.10543228958518
C1	GSE17974_0H_VS_2H_IN_VITRO_ACT_CD4_TCELL_UP	Patient 1_Preinfusion, Patient 4_Peak CAR T	1.75482724703993, 1.95792046401706
C1	GSE17974_0H_VS_72H_IN_VITRO_ACT_CD4_TCELL_UP	Patient 1_Peak CAR T, Patient 4_Peak CAR T	1.90660030050627, 2.05757240776154
C1	GSE17974_CTRL_VS_ACT_IL4_AND_ANTI_IL12_48H_CD4_TCELL_UP	Patient 1_Preinfusion, Patient 4_Peak CAR T	2.22904836872097, 2.29827704858389
C1	GSE18281_CORTEX_VS_MEDULLA_THYMUS_DN	Patient 1_Peak CAR T, Patient 4_Peak CAR T	2.14364192696426, 1.7351107897563
C1	GSE18281_CORTICAL_VS_MEDULLARY_THYMOCYTE_UP	Patient 1_Preinfusion, Patient 4_Peak CAR T	2.27963291044803, 1.82839445222411
C1	GSE18893_TCONV_VS_TREG_2H_CULTURE_DN	Patient 1_Preinfusion, Patient 4_Peak CAR T	2.36213928822657, 1.8842760220104
C1	GSE19198_CTRL_VS_IL21_TREATED_TCELL_1H_UP	Patient 1_Peak CAR T, Patient 1_Preinfusion	1.70439935629508, 2.05703805362096
C1	GSE19198_CTRL_VS_IL21_TREATED_TCELL_24H_DN	Patient 1_Preinfusion, Patient 4_Peak CAR T	1.84936137248765, 1.6669963563144
C1	GSE1925_CTRL_VS_3H_IFNG_STIM_MACROPHAGE_DN	Patient 3_Preinfusion, Patient 4_Peak CAR T	2.02030791108057, 1.73400654447153
C1	GSE19401_UNSTIM_VS_RETINOIC_ACID_AND_PAM2CSK4_STIM_FOLLICULAR_DC_UP	Patient 3_Peak CAR T, Patient 4_Peak CAR T	2.4437335841129, 1.61330307807987
C1	GSE19825_CD24LOW_VS_IL2RA_HIGH_DAY3_EFF_CD8_TCELL_UP	Patient 1_Preinfusion, Patient 2_Preinfusion	2.35961186963141, 1.70966857030736
C1	GSE19825_NAIVE_VS_IL2RAHIGH_DAY3_EFF_CD8_TCELL_UP	Patient 2_Preinfusion, Patient 4_Peak CAR T	2.16814454984837, 1.68159767885768
C1	GSE19888_ADENOSINE_A3R_INH_PRETREAT_AND_ACT_BY_A3R_VS_A3R_INH_AND_TCELL_MEMBRANES_ACT_MAST_CELL_UP	Patient 2_Preinfusion, Patient 4_Peak CAR T	3.25530521679786, 2.38152224605505
C1	GSE19941_IL10_KO_VS_IL10_KO_AND_NFKBP50_KO_LPS_AND_IL10_STIM_MACROPHAGE_UP	Patient 1_Preinfusion, Patient 2_Preinfusion	1.84321628283046, 1.85865708146352
C1	GSE20727_CTRL_VS_H2O2_TREATED_DC_UP	Patient 1_Preinfusion, Patient 2_Preinfusion	1.78829878292615, 1.70128669357869
C1	GSE2128_CTRL_VS_MIMETOPE_NEGATIVE_SELECTION_DP_THYMOCYTE_NOD_UP	Patient 1_Peak CAR T, Patient 1_Preinfusion	2.28727204371754, 2.04141729041796
C1	GSE21360_NAIVE_VS_QUATERNARY_MEMORY_CD8_TCELL_DN	Patient 1_Preinfusion, Patient 2_Preinfusion	2.82754684622159, 1.9370138083203
C1	GSE21360_PRIMARY_VS_QUATERNARY_MEMORY_CD8_TCELL_UP	Patient 1_Preinfusion, Patient 4_Peak CAR T	3.04901841224708, 1.87141923752229
C1	GSE21379_TFH_VS_NON_TFH_SAP_KO_CD4_TCELL_DN	Patient 1_Peak CAR T, Patient 2_Preinfusion	1.89317195512754, 2.13417673448999
C1	GSE21546_UNSTIM_VS_ANTI_CD3_STIM_ELK1_KO_DP_THYMOCYTES_UP	Patient 1_Preinfusion, Patient 2_Preinfusion	2.92395091785643, 1.83893018835719
C1	GSE21546_UNSTIM_VS_ANTI_CD3_STIM_SAP1A_KO_DP_THYMOCYTES_UP	Patient 1_Preinfusion, Patient 2_Preinfusion	2.06708259818092, 2.16430322689329
C1	GSE21546_WT_VS_SAP1A_KO_AND_ELK1_KO_ANTI_CD3_STIM_DP_THYMOCYTES_UP	Patient 1_Preinfusion, Patient 4_Peak CAR T	1.94941454591775, 1.77384024527118
C1	GSE21670_UNTREATED_VS_IL6_TREATED_STAT3_KO_CD4_TCELL_UP	Patient 1_Preinfusion, Patient 4_Peak CAR T	2.05392853698072, 1.7184765166802
C1	GSE21670_UNTREATED_VS_TGFB_IL6_TREATED_STAT3_KO_CD4_TCELL_DN	Patient 2_Preinfusion, Patient 4_Peak CAR T	1.97233920490098, 2.01232415128312
C1	GSE21774_CD62L_POS_CD56_DIM_VS_CD62L_NEG_CD56_DIM_NK_CELL_UP	Patient 1_Preinfusion, Patient 1_Product	2.16832163609476, 1.97792528088992
C1	GSE21927_SPLEEN_C57BL6_VS_4T1_TUMOR_BALBC_MONOCYTES_UP	Patient 2_Preinfusion, Patient 4_Peak	2.79047372450888, 2.78615410290842
C1	GSE22229_UNTREATED_VS_IMMUNOSUPP_THERAPY_RENAL_TRANSPLANT_PATIENT_PBMC_DN	Patient 2_Preinfusion, Patient 4_Peak CAR T	1.89827868443147, 2.08228108728887
C1	GSE22432_CONVENTIONAL_CDC_VS_PLASMACYTOID_PDC_DN	Patient 1_Preinfusion, Patient 2_Day 24 CART	2.03133738174146, 1.41099291587891
C1	GSE22589_HEALTHY_VS_HIV_INFECTED_DC_DN	Patient 1_Preinfusion, Patient 4_Peak CAR T	2.50354200161106, 1.72668098726204
C1	GSE22589_HEALTHY_VS_SIV_INFECTED_DC_DN	Patient 1_Preinfusion, Patient 4_Peak CAR T	2.06325434998779, 1.75283251968719
C1	GSE22589_SIV_VS_HIV_AND_SIV_INFECTED_DC_UP	Patient 1_Preinfusion, Patient 4_Peak CAR T	2.45452339174515, 1.70325739109431
C1	GSE22601_DOUBLE_NEGATIVE_VS_CD4_SINGLE_POSITIVE_THYMOCYTE_UP	Patient 1_Preinfusion, Patient 4_Peak CAR T	1.85961333150251, 1.75651013282916
C1	GSE22601_IMMATURE_CD4_SINGLE_POSITIVE_VS_CD8_SINGLE_POSITIVE_THYMOCYTE_DN	Patient 1_Preinfusion, Patient 4_Peak CAR T	2.07110427163172, 1.96983473556074
C1	GSE22886_DAY0_VS_DAY1_MONOCYTE_IN_CULTURE_UP	Patient 2_Preinfusion, Patient 4_Peak CAR T	2.11467934001701, 1.94116989453345
C1	GSE22886_NAIVE_BCELL_VS_BLOOD_PLASMA_CELL_UP	Patient 1_Preinfusion, Patient 2_Preinfusion	2.29083078110275, 2.04250300025398
C1	GSE22886_NAIVE_BCELL_VS_DC_UP	Patient 2_Preinfusion, Patient 4_Peak	3.04741617687424, 2.08861822940799
C1	GSE22886_NAIVE_BCELL_VS_NEUTROPHIL_UP	Patient 2_Preinfusion, Patient 4_Peak	2.2472414715226, 2.5766550480313
C1	GSE22886_NAIVE_CD4_TCELL_VS_12H_ACT_TH2_UP	Patient 2_Preinfusion, Patient 4_Peak CAR T	2.06707787582959, 1.82851683533411
C1	GSE22886_NAIVE_CD4_TCELL_VS_NKCELL_DN	Patient 1_Peak CAR T, Patient 1_Preinfusion	2.11620028975207, 1.77023039365328
C1	GSE22886_NAIVE_TCELL_VS_NKCELL_DN	Patient 1_Preinfusion, Patient 2_Day 24 CART	2.12145458586144, 1.41099291587891
C1	GSE22886_TCELL_VS_BCELL_NAIVE_UP	Patient 1_Product, Patient 4_Peak CAR T	2.09758123317599, 2.08200341774996
C1	GSE22886_UNSTIM_VS_IL15_STIM_NKCELL_UP	Patient 1_Preinfusion, Patient 2_Preinfusion	2.11456223902011, 2.18769206704201
C1	GSE22886_UNSTIM_VS_IL2_STIM_NKCELL_UP	Patient 1_Preinfusion, Patient 2_Preinfusion	2.05211263485994, 2.82779316538649
C1	GSE22935_UNSTIM_VS_24H_MBOVIS_BCG_STIM_MACROPHAGE_UP	Patient 2_Preinfusion, Patient 4_Peak CAR T	2.28174709933849, 1.65983085695777
C1	GSE22935_UNSTIM_VS_24H_MBOVIS_BCG_STIM_MYD88_KO_MACROPHAGE_UP	Patient 1_Peak CAR T, Patient 1_Preinfusion	2.02112118226685, 1.83769505244837
C1	GSE23502_BM_VS_COLON_TUMOR_HDC_KO_MYELOID_DERIVED_SUPPRESSOR_CELL_DN	Patient 1_Preinfusion, Patient 4_Peak CAR T	1.7745176286882, 1.82642089540386
C1	GSE2405_HEAT_KILLED_LYSATE_VS_LIVE_A_PHAGOCYTOPHILUM_STIM_NEUTROPHIL_9H_DN	Patient 3_Peak CAR T, Patient 4_Peak CAR T	2.42164721189899, 2.07219435672901
C1	GSE24142_DN2_VS_DN3_THYMOCYTE_ADULT_UP	Patient 1_Preinfusion, Patient 3_Preinfusion	1.99021688478871, 1.89956136699901
C1	GSE24142_DN2_VS_DN3_THYMOCYTE_DN	Patient 1_Preinfusion, Patient 1_Product	1.76035359021998, 2.05448488986626
C1	GSE24574_BCL6_HIGH_TFH_VS_NAIVE_CD4_TCELL_UP	Patient 2_Preinfusion, Patient 4_Peak CAR T	1.86930080707653, 1.68420689316331
C1	GSE24574_BCL6_HIGH_TFH_VS_TCONV_CD4_TCELL_DN	Patient 4_Peak CAR T, Patient 4_Preinfusion	1.72854582479643, 2.03581287051914
C1	GSE24574_BCL6_HIGH_TFH_VS_TFH_CD4_TCELL_DN	Patient 2_Preinfusion, Patient 4_Peak CAR T	3.65264340016848, 2.33885054683939
C1	GSE24634_IL4_VS_CTRL_TREATED_NAIVE_CD4_TCELL_DAY3_DN	Patient 1_Peak CAR T, Patient 1_Preinfusion	2.02098312132768, 3.07424482771353
C1	GSE24634_IL4_VS_CTRL_TREATED_NAIVE_CD4_TCELL_DAY5_DN	Patient 1_Peak CAR T, Patient 1_Preinfusion	1.99605138296743, 3.09826348197556
C1	GSE24634_IL4_VS_CTRL_TREATED_NAIVE_CD4_TCELL_DAY5_UP	Patient 3_Preinfusion, Patient 4_Preinfusion	2.12269557356763, 2.07405514516336
C1	GSE24634_NAIVE_CD4_TCELL_VS_DAY7_IL4_CONV_TREG_UP	Patient 1_Preinfusion, Patient 4_Peak CAR T	1.93969475311441, 2.26877421509734
C1	GSE24634_TEFF_VS_TCONV_DAY3_IN_CULTURE_DN	Patient 1_Peak CAR T, Patient 1_Preinfusion	2.25460338129874, 2.2709543371069
C1	GSE24634_TREG_VS_TCONV_POST_DAY3_IL4_CONVERSION_DN	Patient 1_Peak CAR T, Patient 1_Preinfusion	2.8259579635705, 1.9632800959397
C1	GSE25087_FETAL_VS_ADULT_TREG_DN	Patient 2_Preinfusion, Patient 4_Peak CAR T	1.84376702372364, 2.38436736164759
C1	GSE25088_IL4_VS_IL4_AND_ROSIGLITAZONE_STIM_STAT6_KO_MACROPHAGE_DAY10_DN	Patient 1_Preinfusion, Patient 2_Preinfusion	2.04101668026658, 1.98731520598811
C1	GSE25123_CTRL_VS_IL4_AND_ROSIGLITAZONE_STIM_MACROPHAGE_UP	Patient 2_Day 24 CART, Patient 4_Peak CAR T	1.41099291587891, 1.86381064153709
C1	GSE25123_IL4_VS_IL4_AND_ROSIGLITAZONE_STIM_PPARG_KO_MACROPHAGE_DAY10_DN	Patient 1_Preinfusion, Patient 4_Peak CAR T	2.04355782046642, 1.8884405736651
C1	GSE25123_WT_VS_PPARG_KO_MACROPHAGE_UP	Patient 1_Preinfusion, Patient 4_Peak CAR T	2.16759367904603, 1.67008142159936
C1	GSE2585_AIRE_KO_VS_WT_CD80_LOW_MTEC_UP	Patient 1_Peak CAR T, Patient 4_Peak CAR T	1.92041657782998, 2.10986465466289
C1	GSE2585_THYMIC_MACROPHAGE_VS_MTEC_DN	Patient 1_Preinfusion, Patient 4_Peak CAR T	1.76933673877717, 1.91195015175219
C1	GSE2706_UNSTIM_VS_2H_R848_DC_DN	Patient 1_Preinfusion, Patient 2_Preinfusion	1.77830228873499, 1.88901575544094
C1	GSE27291_0H_VS_7D_STIM_GAMMADELTA_TCELL_DN	Patient 1_Peak CAR T, Patient 1_Preinfusion	2.2020291528848, 2.05715077733673
C1	GSE2770_IL12_AND_TGFB_VS_IL4_TREATED_ACT_CD4_TCELL_48H_DN	Patient 1_Preinfusion, Patient 2_Day 24 CART	1.69611745842885, 1.41099291587891
C1	GSE2770_IL12_AND_TGFB_VS_IL4_TREATED_ACT_CD4_TCELL_48H_UP	Patient 1_Preinfusion, Patient 4_Peak CAR T	2.08614592064228, 1.83623024051712
C1	GSE2770_TGFB_AND_IL4_ACT_VS_ACT_CD4_TCELL_2H_UP	Patient 2_Preinfusion, Patient 4_Peak	1.88223084152452, 1.98944602741365
C1	GSE2770_UNTREATED_VS_ACT_CD4_TCELL_6H_UP	Patient 1_Peak CAR T, Patient 3_Peak CAR T	1.86834542749594, 2.35847944574829
C1	GSE2770_UNTREATED_VS_IL12_TREATED_ACT_CD4_TCELL_48H_UP	Patient 1_Preinfusion, Patient 4_Peak CAR T	1.68902699055327, 1.72407514086527
C1	GSE2770_UNTREATED_VS_TGFB_AND_IL4_TREATED_ACT_CD4_TCELL_2H_DN	Patient 1_Peak CAR T, Patient 1_Preinfusion	1.88650461446541, 1.86750963274153
C1	GSE2770_UNTREATED_VS_TGFB_AND_IL4_TREATED_ACT_CD4_TCELL_4H_UP	Patient 1_Preinfusion, Patient 2_Preinfusion	2.64182914641717, 1.71017369471398
C1	GSE27786_BCELL_VS_CD4_TCELL_DN	Patient 1_Preinfusion, Patient 3_Preinfusion	2.14485241586642, 2.01747047794069
C1	GSE27786_LIN_NEG_VS_BCELL_DN	Patient 1_Peak CAR T, Patient 2_Preinfusion	2.33890402630049, 1.63728038982033
C1	GSE27786_LSK_VS_CD4_TCELL_DN	Patient 1_Preinfusion, Patient 2_Day 24 CART	2.01792712874406, 1.41099291587891
C1	GSE27786_LSK_VS_CD8_TCELL_DN	Patient 1_Preinfusion, Patient 2_Preinfusion	2.06049610984207, 1.65556668428143
C1	GSE27786_LSK_VS_NKCELL_DN	Patient 1_Preinfusion, Patient 2_Preinfusion	2.08531909964492, 2.0014786391152
C1	GSE27786_NEUTROPHIL_VS_MONO_MAC_UP	Patient 1_Peak CAR T, Patient 4_Peak CAR T	2.21688944465879, 1.68792304814678
C1	GSE28237_EARLY_VS_LATE_GC_BCELL_DN	Patient 1_Peak CAR T, Patient 2_Preinfusion	2.28852296529521, 1.79596041487156
C1	GSE28726_ACT_CD4_TCELL_VS_ACT_NKTCELL_DN	Patient 2_Preinfusion, Patient 4_Peak CAR T	2.86371727890029, 2.1254821240713
C1	GSE28726_NAIVE_VS_ACTIVATED_CD4_TCELL_UP	Patient 2_Preinfusion, Patient 4_Peak CAR T	2.06122932483271, 1.62481669841346
C1	GSE29164_UNTREATED_VS_CD8_TCELL_TREATED_MELANOMA_DAY3_DN	Patient 1_Preinfusion, Patient 4_Peak CAR T	2.00439406892814, 2.21784665046094
C1	GSE29618_MONOCYTE_VS_PDC_DAY7_FLU_VACCINE_UP	Patient 2_Preinfusion, Patient 4_Peak CAR T	1.91838303905634, 1.85885017631858
C1	GSE30083_SP1_VS_SP3_THYMOCYTE_DN	Patient 1_Preinfusion, Patient 4_Peak CAR T	2.0172682463249, 1.81932222576115
C1	GSE32034_LY6C_HIGH_VS_LOW_ROSIGLIZATONE_TREATED_MONOCYTE_DN	Patient 1_Preinfusion, Patient 1_Product	1.99233383230137, 1.98517042843897
C1	GSE32423_MEMORY_VS_NAIVE_CD8_TCELL_IL7_IL4_UP	Patient 1_Preinfusion, Patient 4_Peak CAR T	1.98430114389233, 1.95935805398194
C1	GSE32901_NAIVE_VS_TH17_ENRICHED_CD4_TCELL_UP	Patient 3_Preinfusion, Patient 4_Peak CAR T	1.97910881841901, 1.85093659232278
C1	GSE32901_TH1_VS_TH17_ENRICHED_CD4_TCELL_UP	Patient 1_Preinfusion, Patient 2_Preinfusion	1.71852147741353, 1.97203632444442
C1	GSE32986_UNSTIM_VS_GMCSF_AND_CURDLAN_HIGHDOSE_STIM_DC_DN	Patient 2_Preinfusion, Patient 4_Peak CAR T	2.60873169845769, 2.1012126941051
C1	GSE33162_HDAC3_KO_VS_HDAC3_KO_MACROPHAGE_UP	Patient 1_Preinfusion, Patient 2_Day 24 CART	2.04828001627396, 1.41099291587891
C1	GSE33292_DN3_THYMOCYTE_VS_TCF1_KO_TCELL_LYMPHOMA_UP	Patient 1_Product, Patient 4_Peak CAR T	2.17788803675586, 1.92385889098166
C1	GSE33513_TCF7_KO_VS_HET_EARLY_THYMIC_PROGENITOR_UP	Patient 1_Preinfusion, Patient 4_Peak CAR T	2.03477647165568, 2.28785166089455
C1	GSE339_CD4POS_VS_CD4CD8DN_DC_UP	Patient 1_Peak CAR T, Patient 4_Peak CAR T	2.05965452204081, 1.60617042641526
C1	GSE34006_A2AR_KO_VS_A2AR_AGONIST_TREATED_TREG_UP	Patient 1_Preinfusion, Patient 2_Day 24 CART	2.46670669437255, 1.41099291587891
C1	GSE34205_HEALTHY_VS_FLU_INF_INFANT_PBMC_UP	Patient 2_Preinfusion, Patient 4_Peak	2.78605264606855, 2.44347614473512
C1	GSE360_DC_VS_MAC_B_MALAYI_HIGH_DOSE_DN	Patient 1_Preinfusion, Patient 4_Peak CAR T	2.75822503256527, 1.73627779074609
C1	GSE360_DC_VS_MAC_T_GONDII_DN	Patient 1_Product, Patient 4_Peak CAR T	1.65000482701671, 2.0082652577318
C1	GSE360_L_MAJOR_VS_B_MALAYI_HIGH_DOSE_DC_UP	Patient 1_Preinfusion, Patient 4_Peak CAR T	2.2772755906381, 1.630796499642
C1	GSE360_L_MAJOR_VS_T_GONDII_MAC_UP	Patient 1_Preinfusion, Patient 4_Peak CAR T	2.22700186783795, 1.7704718963262
C1	GSE360_T_GONDII_VS_B_MALAYI_HIGH_DOSE_DC_DN	Patient 1_Peak CAR T, Patient 1_Preinfusion	2.20600305783948, 1.72327323333971
C1	GSE360_T_GONDII_VS_B_MALAYI_HIGH_DOSE_MAC_DN	Patient 1_Preinfusion, Patient 2_Preinfusion	2.23259077138466, 1.86041273761087
C1	GSE36476_CTRL_VS_TSST_ACT_16H_MEMORY_CD4_TCELL_OLD_UP	Patient 1_Preinfusion, Patient 4_Peak CAR T	2.00300338662943, 1.9866260409086
C1	GSE36476_YOUNG_VS_OLD_DONOR_MEMORY_CD4_TCELL_72H_TSST_ACT_DN	Patient 1_Preinfusion, Patient 2_Preinfusion	1.91531002823388, 2.76057137452687
C1	GSE36826_WT_VS_IL1R_KO_SKIN_STAPH_AUREUS_INF_DN	Patient 1_Preinfusion, Patient 4_Peak CAR T	2.27374498978585, 1.63224748802799
C1	GSE36888_UNTREATED_VS_IL2_TREATED_STAT5_AB_KNOCKIN_TCELL_17H_UP	Patient 1_Peak CAR T, Patient 4_Peak CAR T	1.86277302201555, 1.94382769037099
C1	GSE369_PRE_VS_POST_IL6_INJECTION_IFNG_KO_LIVER_DN	Patient 1_Peak CAR T, Patient 1_Preinfusion	2.20419167458455, 1.72297381758168
C1	GSE3720_UNSTIM_VS_LPS_STIM_VD1_GAMMADELTA_TCELL_DN	Patient 1_Preinfusion, Patient 4_Peak CAR T	1.99660635812702, 1.97035320544182
C1	GSE3720_UNSTIM_VS_LPS_STIM_VD2_GAMMADELTA_TCELL_DN	Patient 1_Preinfusion, Patient 4_Peak CAR T	1.79763237237293, 2.0550125844404
C1	GSE37301_CD4_TCELL_VS_RAG2_KO_NK_CELL_DN	Patient 1_Preinfusion, Patient 4_Peak CAR T	1.81968947191622, 1.67024954204778
C1	GSE37301_HEMATOPOIETIC_STEM_CELL_VS_CD4_TCELL_UP	Patient 1_Preinfusion, Patient 4_Preinfusion	1.94564158885949, 2.16382406576263
C1	GSE37301_HEMATOPOIETIC_STEM_CELL_VS_RAG2_KO_NK_CELL_DN	Patient 1_Preinfusion, Patient 4_Peak CAR T	1.78015209863521, 2.37741774506748
C1	GSE37301_MULTIPOTENT_PROGENITOR_VS_GRAN_MONO_PROGENITOR_DN	Patient 1_Peak CAR T, Patient 1_Preinfusion	1.87874010441718, 2.17676806145094
C1	GSE37301_PRO_BCELL_VS_GRANULOCYTE_MONOCYTE_PROGENITOR_DN	Patient 1_Peak CAR T, Patient 1_Preinfusion	2.0687626275514, 2.3202648406217
C1	GSE37336_LY6C_POS_VS_NEG_NAIVE_CD4_TCELL_DN	Patient 1_Preinfusion, Patient 2_Preinfusion	1.72285587734561, 1.74380288590385
C1	GSE37532_WT_VS_PPARG_KO_VISCERAL_ADIPOSE_TISSUE_TCONV_UP	Patient 1_Peak CAR T, Patient 2_Preinfusion	1.9374155108078, 1.96923251299404
C1	GSE37533_PPARG2_FOXP3_VS_FOXP3_TRANSDUCED_CD4_TCELL_DN	Patient 1_Preinfusion, Patient 2_Preinfusion	3.12366423797382, 1.89864272491055
C1	GSE37534_UNTREATED_VS_PIOGLITAZONE_TREATED_CD4_TCELL_PPARG1_AND_FOXP3_TRASDUCED_DN	Patient 1_Preinfusion, Patient 4_Peak CAR T	2.92882805018654, 1.73815910160582
C1	GSE37605_FOXP3_FUSION_GFP_VS_IRES_GFP_TREG_NOD_DN	Patient 1_Preinfusion, Patient 4_Peak CAR T	2.46226113817518, 2.28881145454941
C1	GSE39110_UNTREATED_VS_IL2_TREATED_CD8_TCELL_DAY3_POST_IMMUNIZATION_UP	Patient 2_Preinfusion, Patient 4_Peak CAR T	1.74535175229079, 1.86192210745756
C1	GSE3982_BCELL_VS_TH1_UP	Patient 2_Preinfusion, Patient 3_Preinfusion	1.89118596635163, 1.91292155868543
C1	GSE3982_BCELL_VS_TH2_UP	Patient 1_Preinfusion, Patient 2_Preinfusion	2.21737846026508, 1.83766472067599
C1	GSE3982_DC_VS_TH2_UP	Patient 1_Preinfusion, Patient 4_Peak CAR T	1.91565751162148, 1.99092347179781
C1	GSE3982_EFF_MEMORY_CD4_TCELL_VS_NKCELL_UP	Patient 2_Day 24 CART, Patient 2_Preinfusion	1.41099291587891, 1.70944014250853
C1	GSE3982_EOSINOPHIL_VS_BCELL_UP	Patient 1_Preinfusion, Patient 4_Peak CAR T	1.77801062264017, 2.47980026159664
C1	GSE3982_EOSINOPHIL_VS_DC_UP	Patient 2_Preinfusion, Patient 4_Peak CAR T	1.67497092536957, 1.92263528022008
C1	GSE3982_EOSINOPHIL_VS_MAC_UP	Patient 1_Preinfusion, Patient 4_Peak CAR T	1.79679425959082, 1.8479393533008
C1	GSE3982_EOSINOPHIL_VS_TH1_UP	Patient 1_Preinfusion, Patient 2_Preinfusion	2.04605473013268, 1.91794886363634
C1	GSE3982_MAST_CELL_VS_CENT_MEMORY_CD4_TCELL_DN	Patient 2_Preinfusion, Patient 4_Peak CAR T	2.43132601738911, 1.91157522726049
C1	GSE3982_NEUTROPHIL_VS_BCELL_UP	Patient 1_Preinfusion, Patient 2_Preinfusion	2.10391186616503, 1.75502477775699
C1	GSE3982_NEUTROPHIL_VS_EFF_MEMORY_CD4_TCELL_UP	Patient 1_Preinfusion, Patient 2_Preinfusion	1.85489387278395, 1.67208542373691
C1	GSE40068_CXCR5POS_BCL6POS_TFH_VS_CXCR5NEG_BCL6NEG_CD4_TCELL_UP	Patient 2_Preinfusion, Patient 4_Peak CAR T	2.9198719973691, 1.77729148903805
C1	GSE40184_HEALTHY_VS_HCV_INFECTED_DONOR_PBMC_DN	Patient 1_Preinfusion, Patient 4_Peak CAR T	1.93817898639808, 1.84564014329184
C1	GSE40274_CTRL_VS_FOXP3_AND_HELIOS_TRANSDUCED_ACTIVATED_CD4_TCELL_UP	Patient 1_Preinfusion, Patient 4_Peak CAR T	1.78295357596289, 1.64192214046285
C1	GSE40274_CTRL_VS_FOXP3_TRANSDUCED_ACTIVATED_CD4_TCELL_DN	Patient 1_Preinfusion, Patient 4_Peak CAR T	2.14344444780368, 1.99974924623567
C1	GSE40443_INDUCED_VS_TOTAL_TREG_DN	Patient 1_Preinfusion, Patient 4_Peak CAR T	1.85669728449081, 1.94733230666465
C1	GSE40666_UNTREATED_VS_IFNA_STIM_STAT1_KO_CD8_TCELL_90MIN_UP	Patient 1_Preinfusion, Patient 2_Day 24 CART	2.37821303615876, 1.41099291587891
C1	GSE40666_WT_VS_STAT1_KO_CD8_TCELL_DN	Patient 1_Preinfusion, Patient 4_Preinfusion	1.72362374199125, 2.05780774942427
C1	GSE411_100MIN_VS_400MIN_IL6_STIM_SOCS3_KO_MACROPHAGE_DN	Patient 1_Preinfusion, Patient 2_Preinfusion	2.18009187910136, 1.76658903438369
C1	GSE411_UNSTIM_VS_100MIN_IL6_STIM_SOCS3_KO_MACROPHAGE_DN	Patient 1_Peak CAR T, Patient 4_Peak CAR T	2.06876882041831, 1.61020946974679
C1	GSE41176_WT_VS_TAK1_KO_ANTI_IGM_STIM_BCELL_6H_UP	Patient 1_Preinfusion, Patient 4_Peak CAR T	1.85632886614613, 2.71547062680666
C1	GSE41867_DAY6_EFFECTOR_VS_DAY30_EXHAUSTED_CD8_TCELL_LCMV_CLONE13_UP	Patient 1_Peak CAR T, Patient 1_Preinfusion	1.94504181892591, 2.71707092712027
C1	GSE41867_DAY6_VS_DAY15_LCMV_ARMSTRONG_EFFECTOR_CD8_TCELL_UP	Patient 1_Preinfusion, Patient 1_Product	2.59065600567848, 1.62963439705354
C1	GSE41867_MEMORY_VS_EXHAUSTED_CD8_TCELL_DAY30_LCMV_UP	Patient 1_Peak CAR T, Patient 1_Preinfusion	2.04945881745692, 2.04373264278696
C1	GSE41867_NAIVE_VS_DAY15_LCMV_EFFECTOR_CD8_TCELL_DN	Patient 1_Preinfusion, Patient 4_Peak CAR T	1.80078944062951, 2.00175045389164
C1	GSE41867_NAIVE_VS_DAY6_LCMV_ARMSTRONG_EFFECTOR_CD8_TCELL_DN	Patient 1_Preinfusion, Patient 4_Peak CAR T	2.29905992934676, 1.90221479763554
C1	GSE41867_NAIVE_VS_DAY6_LCMV_EFFECTOR_CD8_TCELL_DN	Patient 1_Preinfusion, Patient 4_Peak CAR T	2.03342850055948, 2.31596623386062
C1	GSE41867_NAIVE_VS_DAY8_LCMV_EFFECTOR_CD8_TCELL_DN	Patient 1_Preinfusion, Patient 4_Peak CAR T	2.3261052751432, 1.62748888336588
C1	GSE41978_ID2_KO_VS_BIM_KO_KLRG1_LOW_EFFECTOR_CD8_TCELL_UP	Patient 1_Preinfusion, Patient 2_Day 24 CART	2.95445329932089, 1.41099291587891
C1	GSE42021_CD24HI_VS_CD24LOW_TREG_THYMUS_DN	Patient 1_Peak CAR T, Patient 1_Preinfusion	2.00041676260267, 2.88525419771657
C1	GSE42021_CD24INT_VS_CD24LOW_TREG_THYMUS_DN	Patient 1_Preinfusion, Patient 3_Preinfusion	3.19383571622793, 1.91954158606112
C1	GSE42088_2H_VS_24H_LEISHMANIA_INF_DC_UP	Patient 2_Preinfusion, Patient 4_Peak CAR T	2.01051403828189, 2.0504081817292
C1	GSE42724_MEMORY_VS_B1_BCELL_UP	Patient 1_Peak CAR T, Patient 3_Preinfusion	2.03410845218742, 2.13911213345851
C1	GSE43863_DAY6_EFF_VS_DAY150_MEM_TFH_CD4_TCELL_DN	Patient 1_Preinfusion, Patient 4_Peak CAR T	1.8033958802979, 2.14864898257667
C1	GSE43863_DAY6_EFF_VS_DAY150_MEM_TFH_CD4_TCELL_UP	Patient 1_Preinfusion, Patient 4_Peak CAR T	2.14655913995533, 1.63493988890664
C1	GSE43863_DAY6_EFF_VS_DAY150_MEM_TH1_CD4_TCELL_UP	Patient 1_Preinfusion, Patient 4_Peak CAR T	2.02581133449977, 1.89571835471651
C1	GSE43863_TFH_VS_LY6C_LOW_CXCR5NEG_EFFECTOR_CD4_TCELL_DN	Patient 1_Preinfusion, Patient 4_Peak CAR T	2.03786401943249, 1.80696250697892
C1	GSE43863_TH1_VS_LY6C_INT_CXCR5POS_EFFECTOR_CD4_TCELL_DN	Patient 1_Preinfusion, Patient 2_Preinfusion	1.75574597629526, 2.45501574227119
C1	GSE43955_TH0_VS_TGFB_IL6_TH17_ACT_CD4_TCELL_20H_UP	Patient 2_Day 24 CART, Patient 4_Peak CAR T	1.41099291587891, 1.72344009286675
C1	GSE43955_TH0_VS_TGFB_IL6_TH17_ACT_CD4_TCELL_30H_UP	Patient 1_Preinfusion, Patient 4_Peak CAR T	1.79507123702497, 1.92434092906072
C1	GSE45365_NK_CELL_VS_CD11B_DC_DN	Patient 1_Preinfusion, Patient 4_Peak CAR T	2.00986897253791, 2.02758450530459
C1	GSE4590_LARGE_PRE_BCELL_VS_VPREB_POS_LARGE_PRE_BCELL_UP	Patient 1_Peak CAR T, Patient 1_Preinfusion	1.92386084767611, 1.97801232106342
C1	GSE46606_IRF4_KO_VS_WT_UNSTIM_BCELL_DN	Patient 1_Preinfusion, Patient 2_Preinfusion	2.27495698879392, 1.9517054805577
C1	GSE46606_IRF4HIGH_VS_WT_CD40L_IL2_IL5_DAY3_STIMULATED_BCELL_DN	Patient 1_Preinfusion, Patient 2_Day 24 CART	2.16381002157, 1.41099291587891
C1	GSE46606_UNSTIM_VS_CD40L_IL2_IL5_1DAY_STIMULATED_IRF4HIGH_SORTED_BCELL_DN	Patient 1_Product, Patient 4_Peak CAR T	2.08428224216341, 1.96594711876411
C1	GSE46606_UNSTIM_VS_CD40L_IL2_IL5_3DAY_STIMULATED_IRF4MID_SORTED_BCELL_DN	Patient 1_Preinfusion, Patient 1_Product	2.12632044399831, 1.96990153630045
C1	GSE4984_LPS_VS_VEHICLE_CTRL_TREATED_DC_DN	Patient 1_Preinfusion, Patient 4_Peak CAR T	2.04587930011374, 1.64645762636844
C1	GSE4984_UNTREATED_VS_LPS_TREATED_DC_UP	Patient 1_Preinfusion, Patient 2_Preinfusion	1.79155623218757, 2.2298291888404
C1	GSE5455_HEALTHY_VS_TUMOR_BEARING_MOUSE_SPLEEN_MONOCYTE_UP	Patient 1_Preinfusion, Patient 3_Preinfusion	1.93410116359397, 2.18269183254712
C1	GSE5503_MLN_DC_VS_SPLEEN_DC_ACTIVATED_ALLOGENIC_TCELL_UP	Patient 1_Preinfusion, Patient 2_Day 24 CART	1.88273103274578, 1.41099291587891
C1	GSE5503_PLN_DC_VS_SPLEEN_DC_ACTIVATED_ALLOGENIC_TCELL_DN	Patient 1_Peak CAR T, Patient 1_Preinfusion	1.95263211249111, 1.68156018730009
C1	GSE5589_UNSTIM_VS_45MIN_LPS_AND_IL10_STIM_MACROPHAGE_UP	Patient 1_Preinfusion, Patient 4_Peak CAR T	1.96212904655875, 1.75922373058419
C1	GSE5679_CTRL_VS_PPARG_LIGAND_ROSIGLITAZONE_TREATED_DC_DN	Patient 1_Preinfusion, Patient 4_Peak CAR T	1.85944095895678, 2.22274945643114
C1	GSE6259_33D1_POS_DC_VS_CD4_TCELL_DN	Patient 1_Peak CAR T, Patient 3_Preinfusion	1.98401990389281, 2.18047180960623
C1	GSE6259_DEC205_POS_DC_VS_CD8_TCELL_DN	Patient 1_Preinfusion, Patient 4_Peak CAR T	1.88462582828276, 1.97290045103009
C1	GSE6269_HEALTHY_VS_STAPH_PNEUMO_INF_PBMC_UP	Patient 1_Product, Patient 4_Peak CAR T	1.82012419992225, 1.59606115688352
C1	GSE6566_STRONG_VS_WEAK_DC_STIMULATED_CD4_TCELL_DN	Patient 1_Peak CAR T, Patient 2_Preinfusion	2.07225399536932, 2.95365769388198
C1	GSE6674_CPG_VS_PL2_3_STIM_BCELL_UP	Patient 1_Peak CAR T, Patient 3_Peak CAR T	2.12934251203698, 2.25103850226019
C1	GSE6681_DELETED_FOXP3_VS_WT_TREG_UP	Patient 1_Product, Patient 4_Peak CAR T	1.835605110043, 1.7674194929968
C1	GSE7219_UNSTIM_VS_LPS_AND_ANTI_CD40_STIM_DC_DN	Patient 1_Preinfusion, Patient 4_Peak CAR T	2.20279900315274, 2.08116581854173
C1	GSE7219_UNSTIM_VS_LPS_AND_ANTI_CD40_STIM_NIK_NFKB2_KO_DC_DN	Patient 1_Preinfusion, Patient 4_Peak CAR T	1.93724633405639, 2.34654013830488
C1	GSE7219_UNSTIM_VS_LPS_AND_ANTI_CD40_STIM_NIK_NFKB2_KO_DC_UP	Patient 1_Preinfusion, Patient 4_Peak CAR T	2.03643929388802, 1.93824401214986
C1	GSE7219_WT_VS_NIK_NFKB2_KO_DC_DN	Patient 1_Peak CAR T, Patient 1_Preinfusion	1.87209486838117, 2.08372226903759
C1	GSE7219_WT_VS_NIK_NFKB2_KO_LPS_AND_ANTI_CD40_STIM_DC_DN	Patient 1_Peak CAR T, Patient 1_Preinfusion	1.89587209856797, 1.95871342512758
C1	GSE7348_LPS_VS_TOLERIZED_AND_LPS_STIM_MACROPHAGE_DN	Patient 1_Preinfusion, Patient 2_Preinfusion	1.96611152679291, 2.23144284426421
C1	GSE7460_CTRL_VS_TGFB_TREATED_ACT_FOXP3_MUT_TCONV_DN	Patient 1_Preinfusion, Patient 4_Peak CAR T	1.84042594707224, 2.18044424358915
C1	GSE7460_TCONV_VS_TREG_LN_DN	Patient 1_Preinfusion, Patient 4_Peak CAR T	2.33867784871817, 1.84294967267715
C1	GSE7460_WT_VS_FOXP3_HET_ACT_WITH_TGFB_TCONV_UP	Patient 1_Preinfusion, Patient 4_Peak CAR T	2.33029847148618, 1.86985876746598
C1	GSE7768_OVA_ALONE_VS_OVA_WITH_LPS_IMMUNIZED_MOUSE_WHOLE_SPLEEN_6H_DN	Patient 1_Preinfusion, Patient 2_Preinfusion	2.13832596740727, 2.24404838085746
C1	GSE8685_IL2_STARVED_VS_IL2_ACT_IL2_STARVED_CD4_TCELL_UP	Patient 1_Preinfusion, Patient 3_Preinfusion	1.94425905572783, 1.97060386315166
C1	GSE9006_TYPE_1_DIABETES_AT_DX_VS_4MONTH_POST_DX_PBMC_DN	Patient 3_Peak CAR T, Patient 4_Peak	3.05194010944673, 2.51342744716605
C1	GSE9316_CD4_TCELL_BALBC_VS_TH17_ENRI_CD4_TCELL_SKG_PMA_IONO_STIM_FR4NEG_DN	Patient 1_Preinfusion, Patient 4_Peak CAR T	1.9259787849499, 1.70656310158844
C1	GSE9509_LPS_VS_LPS_AND_IL10_STIM_IL10_KO_MACROPHAGE_20MIN_UP	Patient 1_Peak CAR T, Patient 2_Preinfusion	1.67355049916757, 1.93487591700143
C1	GSE9650_EFFECTOR_VS_MEMORY_CD8_TCELL_DN	Patient 2_Preinfusion, Patient 4_Peak CAR T	1.79382830518604, 2.12946025777265
C1	GSE9988_ANTI_TREM1_VS_LPS_MONOCYTE_UP	Patient 2_Preinfusion, Patient 4_Peak CAR T	2.21294516384934, 2.02619736175676
C1	GSE9988_LOW_LPS_VS_VEHICLE_TREATED_MONOCYTE_UP	Patient 1_Preinfusion, Patient 4_Peak CAR T	1.80666618810442, 1.76585838121592
C1	GSE9988_LPS_VS_CTRL_TREATED_MONOCYTE_UP	Patient 1_Preinfusion, Patient 4_Peak CAR T	1.74757784567357, 2.00262304976817
C1	HALLMARK_KRAS_SIGNALING_UP	Patient 1_Preinfusion, Patient 2_Preinfusion	1.98844903275447, 1.74843895327183
C1	HAY_BONE_MARROW_FOLLICULAR_B_CELL	Patient 3_Preinfusion, Patient 4_Product	1.741882407747, 1.58148957820781
C1	HAY_BONE_MARROW_NEUTROPHIL	Patient 1_Preinfusion, Patient 4_Peak CAR T	1.88221980510211, 1.72194262488321
C1	HNF3B_01	Patient 1_Preinfusion, Patient 2_Preinfusion	2.00540599331154, 2.37006854170987
C1	HOEK_MYELOID_DENDRITIC_CELL_2011_2012_TIV_ADULT_7DY_UP	Patient 1_Preinfusion, Patient 4_Peak CAR T	1.62733473125115, 1.70283922264459
C1	HP_ABNORMAL_CIRCULATING_ALBUMIN_CONCENTRATION	Patient 2_Day 24 CART, Patient 2_Peak2	1.40929697543812, 1.62381374998082
C1	HP_ABNORMAL_HEMOGLOBIN	Patient 2_Preinfusion, Patient 4_Peak	2.81221970445844, 2.58279974562667
C1	HP_ABNORMAL_IMMUNE_SYSTEM_MORPHOLOGY	Patient 3_Preinfusion, Patient 4_Preinfusion	1.9061203148311, 2.07315517622
C1	HP_ABNORMAL_LARGE_INTESTINE_MORPHOLOGY	Patient 4_Peak, Patient 4_Preinfusion	2.69006796291814, 2.18928784707492
C1	HP_ABNORMAL_MEAN_CORPUSCULAR_VOLUME	Patient 2_Preinfusion, Patient 4_Peak	2.769620455, 2.2650882354423
C1	HP_ABNORMALITY_OF_THE_MUSCULATURE_OF_THE_HAND	Patient 2_Preinfusion, Patient 4_Peak	2.66997322514962, 2.62645881929865
C1	HP_AMYLOIDOSIS	Patient 2_Day 24 CART, Patient 3_Peak CAR T	1.40929697543812, 1.69162864560836
C1	HP_DEVELOPMENTAL_GLAUCOMA	Patient 2_Preinfusion, Patient 4_Peak	2.42122812072729, 2.62645881929865
C1	HP_DUPLICATION_OF_THUMB_PHALANX	Patient 1_Day 7, Patient 4_Peak	1.85441045200739, 2.69409937451816
C1	HP_GRANULOMATOSIS	Patient 3_Peak, Patient 3_Peak CAR T	1.91266491248617, 1.87619211803758
C1	HP_HYPOPROTEINEMIA	Patient 2_Day 24 CART, Patient 2_Peak2	1.40929697543812, 1.62381374998082
C1	HP_INCREASED_MEAN_CORPUSCULAR_VOLUME	Patient 2_Preinfusion, Patient 4_Peak	2.769620455, 2.2650882354423
C1	HP_MALIGNANT_GENITOURINARY_TRACT_TUMOR	Patient 2_Preinfusion, Patient 4_Peak	2.49012711149543, 2.62645881929865
C1	HP_NEOPLASM_OF_THE_LARGE_INTESTINE	Patient 3_Preinfusion, Patient 4_Peak	1.90162856293153, 2.51984437624139
C1	HP_NORMOCHROMIC_ANEMIA	Patient 2_Preinfusion, Patient 4_Peak	2.32449274562463, 2.57106740213204
C1	HP_PERSISTENCE_OF_HEMOGLOBIN_F	Patient 2_Preinfusion, Patient 4_Peak	2.69302026716429, 2.58279974562667
C1	HP_PLEURITIS	Patient 3_Peak, Patient 3_Preinfusion	1.88908411219525, 2.00672881350201
C1	HP_SARCOMA	Patient 3_Preinfusion, Patient 4_Peak	1.90059541840136, 1.89246899683701
C1	HP_SEROSITIS	Patient 3_Peak, Patient 3_Preinfusion	1.88908411219525, 2.00672881350201
C1	HP_SKIN_RASH	Patient 2_Day 24 CART, Patient 3_Preinfusion	1.40929697543812, 1.89187139019685
C1	HP_THROMBOCYTOSIS	Patient 2_Preinfusion, Patient 4_Peak	2.82492485927882, 2.6557751782796
C1	HU_FETAL_RETINA_RGC	Patient 3_Peak, Patient 4_Peak	2.15743973452672, 1.66891905736456
C1	IFN_module	Patient 1_Preinfusion, Patient 3_Peak CAR T	2.7287229821569, 1.7189920734577
C1	IRF_Q6	Patient 1_Preinfusion, Patient 2_Day 24 CART	1.80871739880341, 1.40225134113095
C1	ISRE_01	Patient 1_Preinfusion, Patient 2_Day 24 CART	1.98097349151748, 1.40225134113095
C1	JNK_DN.V1_UP	Patient 1_Peak CAR T, Patient 1_Preinfusion	1.83724806449609, 1.77301446657911
C1	KAECH_DAY15_EFF_VS_MEMORY_CD8_TCELL_UP	Patient 1_Preinfusion, Patient 4_Peak CAR T	2.29065828634707, 2.09254647805277
C1	KAECH_NAIVE_VS_DAY8_EFF_CD8_TCELL_DN	Patient 1_Preinfusion, Patient 3_Peak	1.74457266486039, 2.27027446541794
C1	KAECH_NAIVE_VS_DAY8_EFF_CD8_TCELL_UP	Patient 2_Preinfusion, Patient 4_Peak CAR T	1.95285585735165, 1.6327977951164
C1	KEGG_CYTOKINE_CYTOKINE_RECEPTOR_INTERACTION	Patient 1_Preinfusion, Patient 1_Product	2.19414187460467, 2.21442710504265
C1	KEGG_ENDOCYTOSIS	Patient 1_Preinfusion, Patient 2_Preinfusion	2.28885942102205, 2.10218868860633
C1	KEGG_LEISHMANIA_INFECTION	Patient 1_Preinfusion, Patient 4_Peak CAR T	2.13694728136576, 1.85893595794104
C1	KEGG_LYSOSOME	Patient 1_Peak CAR T, Patient 4_Peak CAR T	2.30119380320137, 1.89225469509168
C1	KEGG_NEUROACTIVE_LIGAND_RECEPTOR_INTERACTION	Patient 4_Peak CAR T, Patient 4_Preinfusion	1.98492239661474, 1.92273205941996
C1	KEGG_REGULATION_OF_ACTIN_CYTOSKELETON	Patient 1_Preinfusion, Patient 4_Peak	1.87419830196743, 2.01052445450579
C1	KEGG_SNARE_INTERACTIONS_IN_VESICULAR_TRANSPORT	Patient 1_Preinfusion, Patient 4_Preinfusion	1.87530084939164, 1.80167033803265
C1	KRAS.300_UP.V1_UP	Patient 2_Preinfusion, Patient 4_Peak CAR T	1.88468786240493, 1.68296470619481
C1	KRAS.600.LUNG.BREAST_UP.V1_UP	Patient 1_Preinfusion, Patient 2_Preinfusion	1.9301980663769, 2.01740083046962
C1	KRAS.LUNG.BREAST_UP.V1_UP	Patient 1_Preinfusion, Patient 2_Preinfusion	1.86266011650964, 1.82481793266411
C1	LAKE_ADULT_KIDNEY_C14_DISTAL_CONVOLUTED_TUBULE	Patient 1_Preinfusion, Patient 3_Preinfusion	1.70986705684601, 1.83383859209634
C1	LAKE_ADULT_KIDNEY_C17_COLLECTING_SYSTEM_PCS_STRESSED_DISSOC_SUBSET	Patient 1_Preinfusion, Patient 4_Peak CAR T	1.64676036666829, 1.7677181404138
C1	LAKE_ADULT_KIDNEY_C24_ENDOTHELIAL_CELLS_AEA_AND_DVR	Patient 4_Peak, Patient 4_Peak CAR T	1.79047255399383, 1.78674655959083
C1	LAKE_ADULT_KIDNEY_C4_PROXIMAL_TUBULE_EPITHELIAL_CELLS_S2	Patient 1_Preinfusion, Patient 4_Peak CAR T	1.96541905828175, 1.93010111457832
C1	LAKE_ADULT_KIDNEY_C7_PROXIMAL_TUBULE_EPITHELIAL_CELLS_S3	Patient 2_Preinfusion, Patient 4_Peak	2.82852767429451, 3.01149453178987
C1	LAKE_ADULT_KIDNEY_C8_DECENDING_THIN_LIMB	Patient 3_Peak CAR T, Patient 4_Peak	1.68066312719112, 2.64017625632891
C1	MANNO_MIDBRAIN_NEUROTYPES_HDA1	Patient 1_Preinfusion, Patient 4_Peak CAR T	2.09618990744772, 2.4447359747301
C1	MANNO_MIDBRAIN_NEUROTYPES_HGABA	Patient 1_Preinfusion, Patient 4_Peak CAR T	2.42479464321012, 2.10328659263318
C1	MANNO_MIDBRAIN_NEUROTYPES_HNBML5	Patient 1_Product, Patient 4_Peak CAR T	1.75986376509874, 1.69024437240183
C1	MED25_TARGET_GENES	Patient 1_Preinfusion, Patient 2_Preinfusion	2.19308508934378, 2.134030413311
C1	MEK_UP.V1_DN	Patient 1_Preinfusion, Patient 4_Peak CAR T	2.40800739800082, 1.72416773266581
C1	MEL18_DN.V1_DN	Patient 1_Preinfusion, Patient 4_Peak CAR T	2.20680106386428, 2.46572642653967
C1	MODULE_108	Patient 1_Product, Patient 4_Day 21	1.76615324324597, 1.58824302651158
C1	MODULE_112	Patient 1_Preinfusion, Patient 4_Day 21	1.87612204525621, 1.90857760569478
C1	MODULE_114	Patient 3_Peak CAR T, Patient 4_Peak	2.8069891692552, 2.48761327003851
C1	MODULE_129	Patient 1_Preinfusion, Patient 1_Product	1.84771237455971, 2.09598883804382
C1	MODULE_151	Patient 3_Peak CAR T, Patient 4_Peak	2.76674306051055, 2.33316193268321
C1	MODULE_164	Patient 3_Peak, Patient 3_Peak CAR T	1.92121820329201, 2.17829710039534
C1	MODULE_175	Patient 1_Preinfusion, Patient 3_Preinfusion	1.71578990974105, 1.62602052361761
C1	MODULE_247	Patient 1_Preinfusion, Patient 1_Product	1.33324186557418, 1.33888217070518
C1	MODULE_263	Patient 1_Preinfusion, Patient 1_Product	1.31650661203141, 1.76615324324597
C1	MODULE_341	Patient 1_Preinfusion, Patient 2_Preinfusion	2.1252644805934, 1.85052122781329
C1	MODULE_345	Patient 1_Peak CAR T, Patient 1_Preinfusion	2.17581180318753, 2.92901045299773
C1	MODULE_411	Patient 1_Preinfusion, Patient 2_Preinfusion	2.1252644805934, 1.85052122781329
C1	MODULE_481	Patient 1_Preinfusion, Patient 4_Day 21	1.62675170859289, 1.33713305849137
C1	MODULE_51	Patient 3_Peak CAR T, Patient 4_Peak CAR T	1.62182174312444, 1.78588360775027
C1	MODULE_544	Patient 1_Preinfusion, Patient 4_Day 21	1.62675170859289, 1.33713305849137
C1	MODULE_80	Patient 3_Peak CAR T, Patient 4_Peak CAR T	1.62182174312444, 1.78960964943736
C1	MODULE_83	Patient 3_Peak CAR T, Patient 4_Peak	1.89856057975529, 2.64583898439869
C1	MORF_EIF4A2	Patient 2_Preinfusion, Patient 4_Peak	1.73634180382251, 1.80668027147775
C1	MORF_JUND	Patient 2_Preinfusion, Patient 4_Peak	4.13526337739059, 2.81860592200814
C1	MORF_TPT1	Patient 2_Preinfusion, Patient 4_Peak	3.16674208044933, 3.36302179472006
C1	MTOR_UP.V1_DN	Patient 1_Preinfusion, Patient 4_Peak CAR T	1.8176583217867, 1.89479329948992
C1	MURARO_PANCREAS_DUCTAL_CELL	Patient 1_Preinfusion, Patient 4_Peak CAR T	2.0643042904623, 1.58722964118845
C1	NFKAPPAB65_01	Patient 1_Preinfusion, Patient 3_Product	1.98050100204867, 1.7122486379445
C1	NK_like_Suppressive	Patient 1_Preinfusion, Patient 4_Peak CAR T	1.59967481046809, 1.46997978404146
C1	NOTCH_DN.V1_UP	Patient 1_Peak CAR T, Patient 4_Peak CAR T	1.71593813335349, 2.21499083414417
C1	NR0B1_TARGET_GENES	Patient 1_Preinfusion, Patient 4_Peak CAR T	2.12823254804382, 1.81162066086395
C1	P53_DN.V2_UP	Patient 1_Preinfusion, Patient 1_Product	2.00918995029928, 2.14825919959449
C1	PATEL_SKIN_OF_BODY_ZOSTAVAX_AGE_70_93YO_VZV_CHALLENGE_6HR_TOP_30_DEG_UP	Patient 1_Preinfusion, Patient 1_Product	1.84758337031079, 1.68750406877654
C1	PID_MYC_REPRESS_PATHWAY	Patient 1_Peak CAR T, Patient 1_Preinfusion	1.91715612580785, 2.11778541023264
C1	PID_TCR_PATHWAY	Patient 1_Peak CAR T, Patient 1_Preinfusion	1.99714032463305, 2.07332216172267
C1	PRC2_EED_UP.V1_UP	Patient 2_Preinfusion, Patient 4_Peak CAR T	2.01140292420381, 1.63495293815073
C1	PRC2_EZH2_UP.V1_UP	Patient 1_Peak CAR T, Patient 4_Peak CAR T	1.62378763845549, 1.77576826834332
C1	PTEN_DN.V2_UP	Patient 1_Preinfusion, Patient 2_Preinfusion	2.26440506922631, 2.11793073276271
C1	QIU_PBMC_HEPTATITIS_B_SURFACE_ANTIGEN_AGE_UNDER50_NON_RESPONDERS_VS_RESPONDERS_35DY_UP	Patient 1_Preinfusion, Patient 4_Preinfusion	1.63711401325626, 1.57200510399527
C1	QIU_PBMC_HEPTATITIS_B_SURFACE_ANTIGEN_AGE_UNDER50_NON_RESPONDERS_VS_RESPONDERS_7DY_UP	Patient 1_Preinfusion, Patient 4_Preinfusion	1.63711401325626, 1.57200510399527
C1	REACTOME_ACTIVATED_TAK1_MEDIATES_P38_MAPK_ACTIVATION	Patient 2_Preinfusion, Patient 3_Preinfusion	1.63669788944762, 1.66642681824967
C1	REACTOME_ACTIVATION_OF_THE_MRNA_UPON_BINDING_OF_THE_CAP_BINDING_COMPLEX_AND_EIFS_AND_SUBSEQUENT_BINDING_TO_43S	Patient 2_Preinfusion, Patient 4_Peak	3.03248038008504, 2.49591450572282
C1	REACTOME_CALNEXIN_CALRETICULIN_CYCLE	Patient 4_Peak, Patient 4_Peak CAR T	1.77746301770767, 1.82796009757928
C1	REACTOME_CELLULAR_RESPONSE_TO_STARVATION	Patient 2_Preinfusion, Patient 4_Peak	4.26330491722592, 3.590156301317
C1	REACTOME_DISEASES_OF_METABOLISM	Patient 3_Preinfusion, Patient 4_Peak	2.02104033546124, 1.9881288233736
C1	REACTOME_DOWNREGULATION_OF_ERBB2_ERBB3_SIGNALING	Patient 2_Preinfusion, Patient 4_Peak	1.63669788944762, 1.77746301770767
C1	REACTOME_DOWNREGULATION_OF_ERBB2_SIGNALING	Patient 4_Peak, Patient 4_Peak CAR T	1.94202728544029, 1.76867900534703
C1	REACTOME_ENDOSOMAL_SORTING_COMPLEX_REQUIRED_FOR_TRANSPORT_ESCRT	Patient 3_Preinfusion, Patient 4_Peak	1.66642681824967, 1.77746301770767
C1	REACTOME_EUKARYOTIC_TRANSLATION_ELONGATION	Patient 2_Preinfusion, Patient 4_Peak	4.61786837944138, 3.78538988837243
C1	REACTOME_EUKARYOTIC_TRANSLATION_INITIATION	Patient 2_Preinfusion, Patient 4_Peak	4.09863993807663, 3.3679415927186
C1	REACTOME_GLYCOGEN_METABOLISM	Patient 1_Preinfusion, Patient 3_Preinfusion	1.65284959488822, 1.66642681824967
C1	REACTOME_INFLUENZA_INFECTION	Patient 2_Preinfusion, Patient 4_Peak	2.93846348853708, 3.21212993431736
C1	REACTOME_INLB_MEDIATED_ENTRY_OF_LISTERIA_MONOCYTOGENES_INTO_HOST_CELL	Patient 3_Preinfusion, Patient 4_Peak	1.66642681824967, 1.77746301770767
C1	REACTOME_INTERFERON_ALPHA_BETA_SIGNALING	Patient 1_Preinfusion, Patient 4_Peak CAR T	3.13380155243985, 1.82589310620486
C1	REACTOME_INTERFERON_SIGNALING	Patient 1_Preinfusion, Patient 2_Day 24 CART	3.26855464397956, 1.39753275749306
C1	REACTOME_INTERLEUKIN_3_INTERLEUKIN_5_AND_GM_CSF_SIGNALING	Patient 1_Preinfusion, Patient 2_Preinfusion	2.14903682551785, 1.8367960629933
C1	REACTOME_IRON_UPTAKE_AND_TRANSPORT	Patient 2_Preinfusion, Patient 3_Preinfusion	1.96157678241273, 2.01388051277536
C1	REACTOME_LISTERIA_MONOCYTOGENES_ENTRY_INTO_HOST_CELLS	Patient 3_Preinfusion, Patient 4_Peak	1.66642681824967, 1.77746301770767
C1	REACTOME_METABOLISM_OF_AMINO_ACIDS_AND_DERIVATIVES	Patient 2_Preinfusion, Patient 4_Peak	2.55821638575682, 3.44782188510215
C1	REACTOME_MITOPHAGY	Patient 3_Preinfusion, Patient 4_Peak	2.07970115281029, 1.86999363241951
C1	REACTOME_NEGATIVE_REGULATION_OF_FLT3	Patient 3_Preinfusion, Patient 4_Peak	1.66642681824967, 1.77746301770767
C1	REACTOME_NONSENSE_MEDIATED_DECAY_NMD	Patient 2_Preinfusion, Patient 4_Peak	3.85733853396245, 3.42206903213284
C1	REACTOME_NOTCH2_ACTIVATION_AND_TRANSMISSION_OF_SIGNAL_TO_THE_NUCLEUS	Patient 2_Preinfusion, Patient 3_Preinfusion	1.63669788944762, 1.66642681824967
C1	REACTOME_NOTCH2_INTRACELLULAR_DOMAIN_REGULATES_TRANSCRIPTION	Patient 4_Peak, Patient 4_Peak CAR T	1.32825631095622, 1.33221360799973
C1	REACTOME_PINK1_PRKN_MEDIATED_MITOPHAGY	Patient 3_Preinfusion, Patient 4_Peak	2.07970115281029, 1.86999363241951
C1	REACTOME_PREVENTION_OF_PHAGOSOMAL_LYSOSOMAL_FUSION	Patient 3_Preinfusion, Patient 4_Peak	1.66642681824967, 1.77746301770767
C1	REACTOME_PTK6_REGULATES_RTKS_AND_THEIR_EFFECTORS_AKT1_AND_DOK1	Patient 2_Preinfusion, Patient 4_Peak	1.63669788944762, 1.77746301770767
C1	REACTOME_REGULATION_OF_BACH1_ACTIVITY	Patient 3_Preinfusion, Patient 4_Peak	1.66642681824967, 1.77746301770767
C1	REACTOME_REGULATION_OF_EXPRESSION_OF_SLITS_AND_ROBOS	Patient 2_Preinfusion, Patient 4_Peak	2.74614591948252, 3.25872783722187
C1	REACTOME_REGULATION_OF_SIGNALING_BY_CBL	Patient 2_Preinfusion, Patient 3_Preinfusion	1.63669788944762, 1.83898208105397
C1	REACTOME_REGULATION_OF_TNFR1_SIGNALING	Patient 1_Preinfusion, Patient 2_Preinfusion	2.09777672576913, 2.00312701628403
C1	REACTOME_REGULATION_OF_TP53_ACTIVITY_THROUGH_METHYLATION	Patient 3_Preinfusion, Patient 4_Peak	1.87930172917777, 1.77746301770767
C1	REACTOME_RESPONSE_OF_EIF2AK4_GCN2_TO_AMINO_ACID_DEFICIENCY	Patient 2_Preinfusion, Patient 4_Peak	4.48346150550319, 3.70935564635331
C1	REACTOME_RRNA_PROCESSING	Patient 2_Preinfusion, Patient 4_Peak	3.58043484880411, 3.56510108609909
C1	REACTOME_SELENOAMINO_ACID_METABOLISM	Patient 2_Preinfusion, Patient 4_Peak	4.56370585707438, 3.79641982423915
C1	REACTOME_SIGNALING_BY_GPCR	Patient 1_Preinfusion, Patient 4_Peak CAR T	2.67905405230283, 2.21389094186168
C1	REACTOME_SIGNALING_BY_NOTCH1_HD_DOMAIN_MUTANTS_IN_CANCER	Patient 2_Preinfusion, Patient 4_Peak	1.63669788944762, 1.77746301770767
C1	REACTOME_SIGNALING_BY_ROBO_RECEPTORS	Patient 2_Preinfusion, Patient 4_Peak	2.71322756050761, 3.38487027025552
C1	REACTOME_SMOOTH_MUSCLE_CONTRACTION	Patient 3_Peak, Patient 3_Peak CAR T	2.03276903044173, 2.046429927106
C1	REACTOME_SRP_DEPENDENT_COTRANSLATIONAL_PROTEIN_TARGETING_TO_MEMBRANE	Patient 2_Preinfusion, Patient 4_Peak	3.96955416457286, 3.76084249832797
C1	REACTOME_TNF_SIGNALING	Patient 1_Preinfusion, Patient 2_Preinfusion	2.09777672576913, 2.00312701628403
C1	REACTOME_TRANSLATION	Patient 2_Preinfusion, Patient 4_Peak	2.58106699218717, 3.03701188275716
C1	RTAAACA_FREAC2_01	Patient 1_Preinfusion, Patient 4_Peak CAR T	1.8522154570768, 1.87776268822589
C1	SCHERER_PBMC_YF_VAX_AGE_18_40YO_4_TO_7DY_DN	Patient 2_Preinfusion, Patient 4_Peak	2.43623776549181, 2.81786700146316
C1	SOBOLEV_PBMC_PANDEMRIX_AGE_18_64YO_7DY_DN	Patient 1_Preinfusion, Patient 4_Preinfusion	2.64081784309402, 1.84076111852051
C1	STAT4_01	Patient 2_Preinfusion, Patient 4_Peak CAR T	2.29139147919986, 2.0644756199025
C1	T.CD4.TREG	Patient 1_Preinfusion, Patient 1_Product	1.804635350739, 1.63870079325038
C1	T.CD4.TREG_LONG	Patient 1_Peak CAR T, Patient 1_Preinfusion	1.70949692339382, 1.67114024849026
C1	Tfh.Differentiation	Patient 1_Preinfusion, Patient 4_Peak CAR T	1.77226510635893, 1.5995004180929
C1	Th1.like.Tfh	Patient 3_Preinfusion, Patient 4_Peak CAR T	1.5544863032574, 1.58752705925381
C1	THAKAR_PBMC_INACTIVATED_INFLUENZA_AGE_21_30YO_NONRESPONDER_28DY_DN	Patient 2_Preinfusion, Patient 3_Preinfusion	2.00905931114795, 1.9361463890838
C1	THAKAR_PBMC_INACTIVATED_INFLUENZA_AGE_21_30YO_RESPONDERS_28DY_DN	Patient 1_Preinfusion, Patient 4_Peak CAR T	2.16919017677861, 2.07188554353801
C1	THAKAR_PBMC_INACTIVATED_INFLUENZA_AGE_21_30YO_RESPONDERS_7DY_DN	Patient 1_Preinfusion, Patient 4_Peak CAR T	1.6567872173705, 1.98338683171428
C1	TRAVAGLINI_LUNG_AIRWAY_SMOOTH_MUSCLE_CELL	Patient 2_Preinfusion, Patient 4_Peak	2.01768930845801, 2.53948958931112
C1	TRAVAGLINI_LUNG_BASAL_CELL	Patient 3_Peak CAR T, Patient 4_Peak	1.64346172046034, 1.67679470668396
C1	TRAVAGLINI_LUNG_BRONCHIAL_VESSEL_1_CELL	Patient 2_Preinfusion, Patient 4_Peak	2.50894219634988, 2.82179105720532
C1	TRAVAGLINI_LUNG_MESOTHELIAL_CELL	Patient 3_Peak CAR T, Patient 4_Peak	1.8889923398599, 2.53578925978075
C1	TRAVAGLINI_LUNG_MUCOUS_CELL	Patient 1_Preinfusion, Patient 4_Peak CAR T	2.29694459002833, 2.14974514059293
C1	TRAVAGLINI_LUNG_PLATELET_MEGAKARYOCYTE_CELL	Patient 3_Peak, Patient 3_Peak CAR T	1.80118899307038, 1.8604891571457
C1	TRAVAGLINI_LUNG_PROLIFERATING_MACROPHAGE_CELL	Patient 2_Peak2, Patient 3_Peak	2.46596040829092, 1.73041437492298
C1	TRAVAGLINI_LUNG_PROXIMAL_BASAL_CELL	Patient 3_Peak CAR T, Patient 4_Peak	2.13904471653058, 2.61515929122381
C1	ZAK_PBMC_MRKAD5_HIV_1_GAG_POL_NEF_AGE_20_50YO_1DY_UP	Patient 1_Preinfusion, Patient 4_Peak CAR T	2.94306943679173, 1.55845807443355
C1	ZAK_PBMC_MRKAD5_HIV_1_GAG_POL_NEF_AGE_20_50YO_3DY_UP	Patient 1_Peak CAR T, Patient 1_Preinfusion	1.77022089255552, 2.77339154943227
C1	ZHENG_CORD_BLOOD_C2_PUTATIVE_BASOPHIL_EOSINOPHIL_MAST_CELL_PROGENITOR	Patient 1_Preinfusion, Patient 4_Peak CAR T	1.78061396382095, 1.91061693660866
C1	ZHONG_PFC_C7_ORG_UNDERGOING_NEURONAL_DIFFERENTIATION	Patient 2_Preinfusion, Patient 4_Peak CAR T	1.74161830245227, 1.70808645610993
C1	AIZARANI_LIVER_C13_LSECS_2	Patient 2_Preinfusion	1.68905
C1	AIZARANI_LIVER_C18_NK_NKT_CELLS_5	Patient 4_Peak CAR T	1.91012
C1	AIZARANI_LIVER_C2_KUPFFER_CELLS_1	Patient 3_Peak CAR T	2.16718
C1	AIZARANI_LIVER_C24_EPCAM_POS_BILE_DUCT_CELLS_3	Patient 1_Day 7	2.39511
C1	AIZARANI_LIVER_C7_EPCAM_POS_BILE_DUCT_CELLS_2	Patient 1_Day 7	2.45261
C1	AKT_UP_MTOR_DN.V1_UP	Patient 4_Peak CAR T	1.75397
C1	ALK_DN.V1_DN	Patient 1_Preinfusion	1.80175
C1	ANDERSON_BLOOD_CN54GP140_ADJUVANTED_WITH_GLA_AF_AGE_18_45YO_1DY_UP	Patient 3_Preinfusion	1.80609
C1	ANDERSON_BLOOD_CN54GP140_ADJUVANTED_WITH_GLA_AF_AGE_18_45YO_6HR_DN	Patient 2_Preinfusion	1.92253
C1	AP1_C	Patient 4_Peak CAR T	1.98882
C1	AR_02	Patient 1_Peak CAR T	1.66836
C1	ATF_01	Patient 4_Peak CAR T	2.07764
C1	ATF3_Q6	Patient 4_Peak CAR T	1.97318
C1	ATM_TARGET_GENES	Patient 3_Preinfusion	1.61299
C1	BIOCARTA_CSK_PATHWAY	Patient 4_Peak CAR T	1.85467
C1	BIOCARTA_DC_PATHWAY	Patient 4_Peak CAR T	1.78842
C1	BIOCARTA_DREAM_PATHWAY	Patient 4_Peak CAR T	1.587
C1	BIOCARTA_EOSINOPHILS_PATHWAY	Patient 1_Preinfusion	1.34058
C1	BIOCARTA_IFNG_PATHWAY	Patient 1_Preinfusion	1.81052
C1	BIOCARTA_MHC_PATHWAY	Patient 2_Day 24 CART	1.40062
C1	BMI1_DN_MEL18_DN.V1_UP	Patient 1_Preinfusion	2.02874
C1	BUCASAS_PBMC_FLUARIX_FLUVIRIN_CAUCASIAN_MALE_AGE_18_40YO_HIGH_RESPONDERS_1DY_3DY_POSITIVE_PREDICTIVE_OF_TITER	Patient 1_Preinfusion	1.6189
C1	BUSSLINGER_DUODENAL_DIFFERENTIATING_STEM_CELLS	Patient 4_Peak	1.69822
C1	BUSSLINGER_DUODENAL_EARLY_IMMATURE_ENTEROCYTES	Patient 4_Peak	2.21875
C1	BUSSLINGER_DUODENAL_MX_CELLS	Patient 1_Preinfusion	1.31239
C1	BUSSLINGER_DUODENAL_STEM_CELLS	Patient 4_Peak	1.85395
C1	BUSSLINGER_DUODENAL_TRANSIT_AMPLIFYING_CELLS	Patient 4_Peak	2.35414
C1	BUSSLINGER_DUODENAL_TUFT_CELLS	Patient 4_Peak CAR T	1.74979
C1	BUSSLINGER_ESOPHAGEAL_PROLIFERATING_BASAL_CELLS	Patient 2_Day 24 CART	1.40866
C1	BUSSLINGER_ESOPHAGEAL_QUIESCENT_BASAL_CELLS	Patient 2_Preinfusion	2.37237
C1	BUSSLINGER_GASTRIC_CHIEF_CELLS	Patient 4_Peak CAR T	2.19877
C1	BUSSLINGER_GASTRIC_ISTHMUS_CELLS	Patient 2_Peak2	1.92417
C1	BUSSLINGER_GASTRIC_PREZYMOGENIC_CELLS	Patient 4_Peak CAR T	1.67524
C1	BUSSLINGER_GASTRIC_X_CELLS	Patient 4_Peak CAR T	2.53328
C1	CAGCTG_AP4_Q5	Patient 4_Peak CAR T	1.83552
C1	CAHOY_OLIGODENDROCUTIC	Patient 1_Preinfusion	1.80971
C1	CAO_BLOOD_FLUMIST_AGE_05_14YO_CORRELATED_WITH_H3N2_VN_TITER_7DY_POSITIVE	Patient 1_Preinfusion	1.90186
C1	CD4_Tfh	Patient 1_Preinfusion	1.31624
C1	CEBP_01	Patient 1_Preinfusion	1.96046
C1	CEBPA_01	Patient 2_Day 24 CART	1.40225
C1	CEBPB_01	Patient 4_Peak CAR T	2.21731
C1	CEBPDELTA_Q6	Patient 4_Peak CAR T	1.85646
C1	COLE_BLOOD_FLUMIST_QUADRIVALENT_AGE_03_17YO_7DY_UP	Patient 1_Preinfusion	1.62816
C1	COREBINDINGFACTOR_Q6	Patient 1_Product	2.06831
C1	CP2_02	Patient 4_Peak CAR T	1.82328
C1	CREB_Q4_01	Patient 4_Peak CAR T	1.9227
C1	CREL_01	Patient 1_Preinfusion	2.07041
C1	CSR_EARLY_UP.V1_DN	Patient 4_Peak CAR T	1.69314
C1	CTIP_DN.V1_UP	Patient 1_Preinfusion	1.6125
C1	CUI_DEVELOPING_HEART_5TH_WEEK_VENTRICULAR_CARDIOMYOCYTE	Patient 4_Peak CAR T	1.69895
C1	CUI_DEVELOPING_HEART_RIGHT_VENTRICULAR_CARDIOMYOCYTE	Patient 4_Peak CAR T	1.64115
C1	CUI_DEVELOPING_HEART_TRABECULAR_ATRIAL_CARDIOMYOCYTE	Patient 2_Day 24 CART	1.40866
C1	CYCLIN_D1_UP.V1_DN	Patient 4_Peak CAR T	1.74764
C1	CYTAGCAAY_UNKNOWN	Patient 1_Peak CAR T	2.08657
C1	DBP_Q6	Patient 1_Preinfusion	1.87785
C1	Dendrtitic.cells	Patient 3_Peak CAR T	1.56613
C1	DESCARTES_FETAL_ADRENAL_SCHWANN_CELLS	Patient 4_Peak	1.32856
C1	DESCARTES_FETAL_ADRENAL_SLC26A4_PAEP_POSITIVE_CELLS	Patient 1_Preinfusion	1.31519
C1	DESCARTES_FETAL_CEREBRUM_MEGAKARYOCYTES	Patient 1_Peak CAR T	1.73047
C1	DESCARTES_FETAL_HEART_SCHWANN_CELLS	Patient 4_Peak	1.32856
C1	DESCARTES_FETAL_INTESTINE_ENS_GLIA	Patient 4_Peak	1.32856
C1	DESCARTES_FETAL_INTESTINE_LYMPHATIC_ENDOTHELIAL_CELLS	Patient 1_Preinfusion	1.31729
C1	DESCARTES_FETAL_INTESTINE_STROMAL_CELLS	Patient 4_Peak CAR T	1.32725
C1	DESCARTES_FETAL_LIVER_MEGAKARYOCYTES	Patient 1_Preinfusion	1.99199
C1	DESCARTES_FETAL_LUNG_MEGAKARYOCYTES	Patient 1_Preinfusion	2.13828
C1	DESCARTES_FETAL_MUSCLE_MYELOID_CELLS	Patient 3_Peak CAR T	1.56922
C1	DESCARTES_FETAL_MUSCLE_SCHWANN_CELLS	Patient 4_Peak	1.32856
C1	DESCARTES_FETAL_MUSCLE_STROMAL_CELLS	Patient 4_Peak CAR T	1.32725
C1	DESCARTES_FETAL_PANCREAS_ENS_GLIA	Patient 4_Peak	1.32856
C1	DESCARTES_FETAL_PLACENTA_MEGAKARYOCYTES	Patient 1_Preinfusion	1.65709
C1	DESCARTES_FETAL_SPLEEN_AFP_ALB_POSITIVE_CELLS	Patient 3_Peak CAR T	1.64912
C1	DESCARTES_FETAL_SPLEEN_MEGAKARYOCYTES	Patient 4_Peak CAR T	1.78563
C1	DESCARTES_FETAL_STOMACH_ENS_GLIA	Patient 4_Peak	1.32856
C1	DESCARTES_FETAL_STOMACH_MYELOID_CELLS	Patient 1_Preinfusion	1.94681
C1	DESCARTES_MAIN_FETAL_ANTIGEN_PRESENTING_CELLS	Patient 1_Preinfusion	1.79039
C1	DESCARTES_MAIN_FETAL_EPICARDIAL_FAT_CELLS	Patient 1_Preinfusion	1.30959
C1	DESCARTES_MAIN_FETAL_MEGAKARYOCYTES	Patient 1_Preinfusion	2.02992
C1	DESCARTES_MAIN_FETAL_MICROGLIA	Patient 2_Preinfusion	1.84006
C1	DESCARTES_MAIN_FETAL_MYELOID_CELLS	Patient 3_Peak CAR T	1.62994
C1	DESCARTES_MAIN_FETAL_SCHWANN_CELLS	Patient 4_Peak	1.32856
C1	DESCARTES_MAIN_FETAL_THYMOCYTES	Patient 3_Preinfusion	2.09221
C1	DURANTE_ADULT_OLFACTORY_NEUROEPITHELIUM_PLASMA_CELLS	Patient 4_Peak CAR T	1.70469
C1	DURANTE_ADULT_OLFACTORY_NEUROEPITHELIUM_RESPIRATORY_CILIATED_CELLS	Patient 3_Peak CAR T	1.68303
C1	DURANTE_ADULT_OLFACTORY_NEUROEPITHELIUM_VASCULAR_SMOOTH_MUSCLE_CELLS	Patient 4_Peak CAR T	2.26784
C1	EGFR_TARGET_GENES	Patient 4_Peak CAR T	1.33426
C1	EIF4E_DN	Patient 1_Preinfusion	1.71982
C1	ERWIN_COHEN_BLOOD_TC_83_AGE_23_48YO_VACCINATED_VS_CONTROL_2DY_UP	Patient 1_Preinfusion	3.14313
C1	ERWIN_COHEN_BLOOD_VACCINE_TC_83_AGE_23_48YO_VACCINATED_VS_CONTROL_7DY_UP	Patient 1_Preinfusion	3.0169
C1	ERWIN_COHEN_PBMC_TC_83_AGE_18_45YO_NAIVE_NOT_PREVIOUSLY_IMMUNIZED_24HR_DEG_CANONICAL_PATHWAY_MEMBERS_UP	Patient 1_Preinfusion	2.29664
C1	ERWIN_COHEN_PBMC_TC_83_AGE_18_45YO_NON_RESPONDERS_PREVIOUSLY_IMMUNIZED_24HR_DEG_CANONICAL_PATHWAY_MEMBERS_DN	Patient 4_Peak CAR T	1.59566
C1	ERWIN_COHEN_PBMC_TC_83_AGE_18_45YO_RESPONDERS_PREVIOUSLY_IMMUNIZED_24HR_DEG_CANONICAL_PATHWAY_MEMBERS_UP	Patient 1_Preinfusion	1.85417
C1	ESC_V6.5_UP_LATE.V1_DN	Patient 3_Preinfusion	2.06885
C1	FAN_EMBRYONIC_CTX_ASTROCYTE_1	Patient 4_Peak CAR T	1.76979
C1	FAN_EMBRYONIC_CTX_ASTROCYTE_2	Patient 4_Peak CAR T	1.73152
C1	FAN_EMBRYONIC_CTX_BIG_GROUPS_CAJAL_RETZIUS	Patient 4_Peak	2.11333
C1	FAN_EMBRYONIC_CTX_OLIG	Patient 1_Peak CAR T	2.39832
C1	FAN_OVARY_CL17_PUTATIVE_APOPTOTIC_SMOOTH_MUSCLE_CELL	Patient 4_Peak CAR T	1.54402
C1	FAN_OVARY_CL6_PUTATIVE_EARLY_ATRETIC_FOLLICLE_THECAL_CELL_2	Patient 4_Peak CAR T	1.98207
C1	FLETCHER_PBMC_BCG_10W_INFANT_BCG_STIMULATED_VS_UNSTIMULATED_10W_UP	Patient 1_Preinfusion	2.36076
C1	FOURATI_BLOOD_TWINRIX_AGE_65_83YO_POOR_RESPONDERS_VS_RESPONDERS_0DY_NETWORK_INFERENCE_UP	Patient 1_Preinfusion	1.73089
C1	FOXD3_01	Patient 1_Preinfusion	2.03628
C1	FRANCO_BLOOD_SANOFI_PASTEUR_SA_INACTIVATED_INFLUENZA_VACCINE_CORRELATED_WITH_ANTIBODY_RESPONSE_AGE_18_40YO_1DY_POSITIVE	Patient 1_Preinfusion	3.02582
C1	FREAC3_01	Patient 4_Peak CAR T	1.90794
C1	FULLER_PBMC_F_TULARENSIS_VACCINE_LVS_AGE_22_54YO_192HR_DN	Patient 2_Day 24 CART	1.41897
C1	FULLER_PBMC_F_TULARENSIS_VACCINE_LVS_AGE_22_54YO_336HR_DN	Patient 2_Day 24 CART	1.41897
C1	GAO_LARGE_INTESTINE_24W_C1_DCLK1POS_PROGENITOR	Patient 1_Preinfusion	1.55663
C1	GAO_SMALL_INTESTINE_24W_C4_ENTEROCYTE_PROGENITOR_SUBTYPE_2	Patient 3_Peak CAR T	1.56762
C1	GARCIA_PINERES_PBMC_HPV_16_L1_VLP_AGE_18_25YO_2MO_UP	Patient 1_Product	1.90856
C1	GARCIA_PINERES_PBMC_HPV_16_L1_VLP_AGE_18_25YO_STIMULATED_VS_UNSTIMULATED_0DY_VACCINATION_INDEPENDENT_UP	Patient 1_Preinfusion	2.15174
C1	GAUCHER_PBMC_YF_VAX_STAMARIL_UNKNOWN_AGE_10DY_UP	Patient 1_Preinfusion	1.82782
C1	GAUCHER_PBMC_YF_VAX_STAMARIL_UNKNOWN_AGE_3DY_UP	Patient 1_Preinfusion	3.03601
C1	GCM_ACTG1	Patient 4_Peak	1.78385
C1	GCM_NPM1	Patient 4_Peak	2.08755
C1	GCM_PFN1	Patient 4_Peak	1.86434
C1	GCM_PTPRD	Patient 1_Peak CAR T	1.54983
C1	GCM_PTPRU	Patient 2_Preinfusion	1.53701
C1	GGGNNTTTCC_NFKB_Q6_01	Patient 3_Product	1.64108
C1	GNF2_CD14	Patient 1_Preinfusion	1.84521
C1	GNF2_DAP3	Patient 4_Peak	1.95283
C1	GNF2_FOS	Patient 4_Peak CAR T	1.80384
C1	GNF2_HCK	Patient 1_Product	1.74815
C1	GNF2_MBD4	Patient 4_Peak	1.92715
C1	GNF2_MSN	Patient 2_Peak2	2.1465
C1	GNF2_SPI1	Patient 2_Preinfusion	1.51836
C1	GOBP_ACUTE_INFLAMMATORY_RESPONSE	Patient 1_Preinfusion	2.03046
C1	GOBP_ADENYLATE_CYCLASE_ACTIVATING_G_PROTEIN_COUPLED_RECEPTOR_SIGNALING_PATHWAY	Patient 4_Peak CAR T	2.23959
C1	GOBP_ADENYLATE_CYCLASE_MODULATING_G_PROTEIN_COUPLED_RECEPTOR_SIGNALING_PATHWAY	Patient 4_Peak CAR T	2.14764
C1	GOBP_ADIPOSE_TISSUE_DEVELOPMENT	Patient 4_Peak CAR T	1.87021
C1	GOBP_ALPHA_BETA_T_CELL_ACTIVATION	Patient 1_Preinfusion	1.95859
C1	GOBP_AMIDE_BIOSYNTHETIC_PROCESS	Patient 4_Peak	2.20115
C1	GOBP_AMYLOID_FIBRIL_FORMATION	Patient 2_Day 24 CART	1.40441
C1	GOBP_ANATOMICAL_STRUCTURE_HOMEOSTASIS	Patient 2_Day 24 CART	1.64373
C1	GOBP_ANTIGEN_PROCESSING_AND_PRESENTATION	Patient 2_Day 24 CART	1.40441
C1	GOBP_ANTIGEN_PROCESSING_AND_PRESENTATION_OF_EXOGENOUS_PEPTIDE_ANTIGEN_VIA_MHC_CLASS_I	Patient 2_Day 24 CART	1.40441
C1	GOBP_ANTIGEN_PROCESSING_AND_PRESENTATION_OF_PEPTIDE_ANTIGEN	Patient 2_Day 24 CART	1.40441
C1	GOBP_ANTIGEN_PROCESSING_AND_PRESENTATION_OF_PEPTIDE_ANTIGEN_VIA_MHC_CLASS_I	Patient 2_Day 24 CART	1.40441
C1	GOBP_B_CELL_RECEPTOR_SIGNALING_PATHWAY	Patient 1_Preinfusion	1.97324
C1	GOBP_BEHAVIOR	Patient 2_Day 24 CART	1.40441
C1	GOBP_BIOLOGICAL_PROCESS_INVOLVED_IN_SYMBIOTIC_INTERACTION	Patient 4_Peak	2.26144
C1	GOBP_BLOOD_VESSEL_REMODELING	Patient 1_Preinfusion	1.91364
C1	GOBP_BONE_REMODELING	Patient 1_Preinfusion	2.05529
C1	GOBP_BONE_RESORPTION	Patient 1_Preinfusion	1.90535
C1	GOBP_CALCINEURIN_MEDIATED_SIGNALING	Patient 1_Preinfusion	1.89633
C1	GOBP_CARDIAC_MUSCLE_MYOBLAST_PROLIFERATION	Patient 4_Peak CAR T	1.33102
C1	GOBP_CATION_TRANSPORT	Patient 1_Preinfusion	1.75796
C1	GOBP_CD8_POSITIVE_ALPHA_BETA_T_CELL_ACTIVATION	Patient 4_Peak CAR T	1.7517
C1	GOBP_CD8_POSITIVE_ALPHA_BETA_T_CELL_PROLIFERATION	Patient 1_Preinfusion	1.8177
C1	GOBP_CELL_AGING	Patient 2_Day 24 CART	1.40441
C1	GOBP_CELL_CELL_ADHESION_MEDIATED_BY_INTEGRIN	Patient 1_Preinfusion	1.87898
C1	GOBP_CELL_CELL_ADHESION_VIA_PLASMA_MEMBRANE_ADHESION_MOLECULES	Patient 1_Preinfusion	1.92744
C1	GOBP_CELL_PROLIFERATION_INVOLVED_IN_KIDNEY_DEVELOPMENT	Patient 1_Preinfusion	1.67767
C1	GOBP_CELLULAR_AMIDE_METABOLIC_PROCESS	Patient 4_Peak	2.22498
C1	GOBP_CELLULAR_DEFENSE_RESPONSE	Patient 1_Preinfusion	2.24994
C1	GOBP_CELLULAR_RESPONSE_TO_HORMONE_STIMULUS	Patient 4_Peak CAR T	1.6981
C1	GOBP_CELLULAR_RESPONSE_TO_INORGANIC_SUBSTANCE	Patient 2_Day 24 CART	1.40441
C1	GOBP_CELLULAR_RESPONSE_TO_IRON_ION	Patient 2_Day 24 CART	1.40441
C1	GOBP_CELLULAR_RESPONSE_TO_KETONE	Patient 4_Peak CAR T	1.97324
C1	GOBP_CELLULAR_RESPONSE_TO_NICOTINE	Patient 2_Day 24 CART	1.40441
C1	GOBP_CELLULAR_RESPONSE_TO_PROSTAGLANDIN_E_STIMULUS	Patient 4_Peak CAR T	1.78892
C1	GOBP_CELLULAR_RESPONSE_TO_PROSTAGLANDIN_STIMULUS	Patient 4_Peak CAR T	1.78892
C1	GOBP_CELLULAR_SENESCENCE	Patient 2_Day 24 CART	1.40441
C1	GOBP_CENTRAL_NERVOUS_SYSTEM_NEURON_DIFFERENTIATION	Patient 2_Day 24 CART	1.40441
C1	GOBP_COGNITION	Patient 2_Day 24 CART	1.40441
C1	GOBP_CYTOKINE_MEDIATED_SIGNALING_PATHWAY	Patient 1_Preinfusion	2.5652
C1	GOBP_CYTOPLASMIC_TRANSLATION	Patient 4_Peak	2.43751
C1	GOBP_DEFENSE_RESPONSE_TO_BACTERIUM	Patient 1_Preinfusion	2.18138
C1	GOBP_DEFENSE_RESPONSE_TO_TUMOR_CELL	Patient 4_Peak CAR T	1.60412
C1	GOBP_DEFENSE_RESPONSE_TO_VIRUS	Patient 1_Preinfusion	2.34231
C1	GOBP_DEVELOPMENTAL_PIGMENTATION	Patient 1_Preinfusion	1.71456
C1	GOBP_DIENCEPHALON_DEVELOPMENT	Patient 1_Preinfusion	1.75226
C1	GOBP_ENDOTHELIAL_CELL_DEVELOPMENT	Patient 1_Preinfusion	1.94689
C1	GOBP_ENDOTHELIUM_DEVELOPMENT	Patient 1_Preinfusion	2.06585
C1	GOBP_EPITHELIAL_CELL_DIFFERENTIATION	Patient 1_Preinfusion	1.84269
C1	GOBP_EPITHELIAL_CELL_PROLIFERATION	Patient 2_Day 24 CART	1.40441
C1	GOBP_ERYTHROCYTE_HOMEOSTASIS	Patient 2_Day 24 CART	1.40441
C1	GOBP_ESTABLISHMENT_OF_ENDOTHELIAL_BARRIER	Patient 1_Preinfusion	1.94689
C1	GOBP_ESTABLISHMENT_OF_PROTEIN_LOCALIZATION_TO_MEMBRANE	Patient 4_Peak	3.29381
C1	GOBP_ESTABLISHMENT_OF_PROTEIN_LOCALIZATION_TO_ORGANELLE	Patient 4_Peak	2.77634
C1	GOBP_ESTABLISHMENT_OF_PROTEIN_LOCALIZATION_TO_PLASMA_MEMBRANE	Patient 1_Preinfusion	1.86668
C1	GOBP_EXOCYTIC_PROCESS	Patient 1_Preinfusion	1.98719
C1	GOBP_EXOCYTOSIS	Patient 1_Preinfusion	1.58737
C1	GOBP_EXTERNAL_ENCAPSULATING_STRUCTURE_ORGANIZATION	Patient 1_Preinfusion	1.96519
C1	GOBP_FACE_DEVELOPMENT	Patient 1_Preinfusion	1.7554
C1	GOBP_FAT_CELL_DIFFERENTIATION	Patient 4_Peak CAR T	1.94088
C1	GOBP_FOREBRAIN_GENERATION_OF_NEURONS	Patient 2_Day 24 CART	1.40441
C1	GOBP_G_PROTEIN_COUPLED_RECEPTOR_SIGNALING_PATHWAY	Patient 4_Peak CAR T	2.1494
C1	GOBP_GLAND_MORPHOGENESIS	Patient 1_Preinfusion	2.23556
C1	GOBP_GOLGI_TO_PLASMA_MEMBRANE_PROTEIN_TRANSPORT	Patient 1_Preinfusion	1.90243
C1	GOBP_HETEROTYPIC_CELL_CELL_ADHESION	Patient 1_Preinfusion	2.29393
C1	GOBP_HYPOTHALAMUS_DEVELOPMENT	Patient 1_Preinfusion	1.75226
C1	GOBP_I_KAPPAB_KINASE_NF_KAPPAB_SIGNALING	Patient 1_Preinfusion	2.54716
C1	GOBP_IMMUNOLOGICAL_SYNAPSE_FORMATION	Patient 1_Preinfusion	1.97632
C1	GOBP_INFLAMMATORY_RESPONSE_TO_WOUNDING	Patient 1_Preinfusion	1.61504
C1	GOBP_INOSITOL_PHOSPHATE_MEDIATED_SIGNALING	Patient 1_Preinfusion	1.89633
C1	GOBP_INSULIN_SECRETION	Patient 3_Preinfusion	2.09453
C1	GOBP_INTERLEUKIN_2_PRODUCTION	Patient 1_Preinfusion	2.00994
C1	GOBP_INTERLEUKIN_21_MEDIATED_SIGNALING_PATHWAY	Patient 1_Preinfusion	1.75017
C1	GOBP_INTERLEUKIN_6_MEDIATED_SIGNALING_PATHWAY	Patient 1_Preinfusion	1.8066
C1	GOBP_INTRACELLULAR_PROTEIN_TRANSPORT	Patient 4_Peak	1.92286
C1	GOBP_ION_HOMEOSTASIS	Patient 1_Preinfusion	1.86966
C1	GOBP_KERATINOCYTE_DIFFERENTIATION	Patient 1_Preinfusion	1.96809
C1	GOBP_LEUKOCYTE_ADHESION_TO_VASCULAR_ENDOTHELIAL_CELL	Patient 1_Preinfusion	2.04556
C1	GOBP_LEUKOCYTE_AGGREGATION	Patient 1_Preinfusion	1.82033
C1	GOBP_LEUKOCYTE_APOPTOTIC_PROCESS	Patient 3_Preinfusion	2.12606
C1	GOBP_LEUKOCYTE_DIFFERENTIATION	Patient 4_Peak CAR T	1.93218
C1	GOBP_LEUKOCYTE_MEDIATED_IMMUNITY	Patient 1_Preinfusion	1.62829
C1	GOBP_LEUKOCYTE_PROLIFERATION	Patient 1_Preinfusion	2.15245
C1	GOBP_MEMBRANE_ORGANIZATION	Patient 2_Peak2	2.3229
C1	GOBP_METAL_ION_HOMEOSTASIS	Patient 1_Preinfusion	1.84823
C1	GOBP_MICROGLIAL_CELL_ACTIVATION	Patient 1_Product	1.99654
C1	GOBP_MODULATION_BY_HOST_OF_SYMBIONT_PROCESS	Patient 3_Product	1.83299
C1	GOBP_MODULATION_BY_SYMBIONT_OF_ENTRY_INTO_HOST	Patient 1_Preinfusion	2.23065
C1	GOBP_MODULATION_OF_AGE_RELATED_BEHAVIORAL_DECLINE	Patient 2_Day 24 CART	1.40441
C1	GOBP_MODULATION_OF_PROCESS_OF_OTHER_ORGANISM	Patient 3_Product	2.00499
C1	GOBP_MODULATION_OF_PROCESS_OF_OTHER_ORGANISM_INVOLVED_IN_SYMBIOTIC_INTERACTION	Patient 3_Product	1.83299
C1	GOBP_MULTICELLULAR_ORGANISMAL_HOMEOSTASIS	Patient 2_Day 24 CART	1.64373
C1	GOBP_MYELOID_CELL_HOMEOSTASIS	Patient 2_Day 24 CART	1.40441
C1	GOBP_MYELOID_LEUKOCYTE_ACTIVATION	Patient 1_Preinfusion	1.60877
C1	GOBP_MYELOID_LEUKOCYTE_MIGRATION	Patient 1_Product	2.01666
C1	GOBP_MYOBLAST_PROLIFERATION	Patient 4_Peak CAR T	1.33102
C1	GOBP_NATURAL_KILLER_CELL_ACTIVATION	Patient 4_Peak CAR T	1.97589
C1	GOBP_NATURAL_KILLER_CELL_ACTIVATION_INVOLVED_IN_IMMUNE_RESPONSE	Patient 1_Preinfusion	1.6222
C1	GOBP_NATURAL_KILLER_CELL_MEDIATED_IMMUNITY	Patient 1_Preinfusion	2.02268
C1	GOBP_NEGATIVE_REGULATION_OF_ADAPTIVE_IMMUNE_RESPONSE	Patient 1_Preinfusion	2.09403
C1	GOBP_NEGATIVE_REGULATION_OF_BIOMINERALIZATION	Patient 4_Peak CAR T	1.60797
C1	GOBP_NEGATIVE_REGULATION_OF_CELL_ACTIVATION	Patient 1_Preinfusion	2.13687
C1	GOBP_NEGATIVE_REGULATION_OF_CELL_KILLING	Patient 4_Peak CAR T	1.78892
C1	GOBP_NEGATIVE_REGULATION_OF_CELL_PROJECTION_ORGANIZATION	Patient 2_Day 24 CART	1.40441
C1	GOBP_NEGATIVE_REGULATION_OF_CHEMOKINE_MEDIATED_SIGNALING_PATHWAY	Patient 1_Preinfusion	1.33339
C1	GOBP_NEGATIVE_REGULATION_OF_CYTOKINE_PRODUCTION_INVOLVED_IN_IMMUNE_RESPONSE	Patient 1_Preinfusion	1.85362
C1	GOBP_NEGATIVE_REGULATION_OF_EPITHELIAL_CELL_APOPTOTIC_PROCESS	Patient 1_Preinfusion	1.67409
C1	GOBP_NEGATIVE_REGULATION_OF_EPITHELIAL_CELL_PROLIFERATION	Patient 2_Day 24 CART	1.40441
C1	GOBP_NEGATIVE_REGULATION_OF_INTERLEUKIN_2_PRODUCTION	Patient 1_Preinfusion	1.81433
C1	GOBP_NEGATIVE_REGULATION_OF_INTERLEUKIN_8_PRODUCTION	Patient 4_Peak CAR T	1.59643
C1	GOBP_NEGATIVE_REGULATION_OF_LEUKOCYTE_APOPTOTIC_PROCESS	Patient 1_Preinfusion	1.95375
C1	GOBP_NEGATIVE_REGULATION_OF_LEUKOCYTE_MEDIATED_IMMUNITY	Patient 1_Preinfusion	2.54738
C1	GOBP_NEGATIVE_REGULATION_OF_MACROPHAGE_ACTIVATION	Patient 1_Preinfusion	1.71732
C1	GOBP_NEGATIVE_REGULATION_OF_MICROGLIAL_CELL_ACTIVATION	Patient 1_Preinfusion	1.71732
C1	GOBP_NEGATIVE_REGULATION_OF_MULTI_ORGANISM_PROCESS	Patient 1_Preinfusion	1.72196
C1	GOBP_NEGATIVE_REGULATION_OF_NEUROINFLAMMATORY_RESPONSE	Patient 1_Preinfusion	1.71732
C1	GOBP_NEGATIVE_REGULATION_OF_NEURON_PROJECTION_DEVELOPMENT	Patient 2_Day 24 CART	1.40441
C1	GOBP_NEGATIVE_REGULATION_OF_PEPTIDE_SECRETION	Patient 1_Preinfusion	1.98934
C1	GOBP_NEGATIVE_REGULATION_OF_PROTEIN_MATURATION	Patient 1_Preinfusion	2.0728
C1	GOBP_NEGATIVE_REGULATION_OF_RECEPTOR_BINDING	Patient 2_Day 24 CART	1.40441
C1	GOBP_NEGATIVE_REGULATION_OF_RESPONSE_TO_CYTOKINE_STIMULUS	Patient 1_Preinfusion	2.12307
C1	GOBP_NEGATIVE_REGULATION_OF_SECRETION	Patient 1_Preinfusion	2.09834
C1	GOBP_NEGATIVE_REGULATION_OF_T_CELL_PROLIFERATION	Patient 1_Preinfusion	1.93167
C1	GOBP_NEGATIVE_REGULATION_OF_T_HELPER_CELL_DIFFERENTIATION	Patient 4_Peak CAR T	1.61374
C1	GOBP_NEGATIVE_REGULATION_OF_VIRAL_PROCESS	Patient 1_Preinfusion	2.34372
C1	GOBP_NERVOUS_SYSTEM_PROCESS	Patient 2_Day 24 CART	1.40441
C1	GOBP_NEUROGENESIS	Patient 1_Preinfusion	1.56453
C1	GOBP_NEUROINFLAMMATORY_RESPONSE	Patient 1_Preinfusion	1.97856
C1	GOBP_NUCLEAR_TRANSCRIBED_MRNA_CATABOLIC_PROCESS	Patient 4_Peak	2.64228
C1	GOBP_NUCLEAR_TRANSCRIBED_MRNA_POLY_A_TAIL_SHORTENING	Patient 4_Peak CAR T	2.19049
C1	GOBP_ORGANIC_CYCLIC_COMPOUND_CATABOLIC_PROCESS	Patient 4_Peak	1.81612
C1	GOBP_PEPTIDE_BIOSYNTHETIC_PROCESS	Patient 4_Peak	2.31026
C1	GOBP_PEPTIDE_HORMONE_SECRETION	Patient 3_Preinfusion	2.09723
C1	GOBP_PEPTIDE_METABOLIC_PROCESS	Patient 4_Peak	2.29318
C1	GOBP_PEPTIDYL_TYROSINE_MODIFICATION	Patient 1_Preinfusion	2.02423
C1	GOBP_POSITIVE_REGULATION_OF_ACTIVATION_OF_JANUS_KINASE_ACTIVITY	Patient 1_Preinfusion	1.33339
C1	GOBP_POSITIVE_REGULATION_OF_ADAPTIVE_IMMUNE_RESPONSE	Patient 2_Day 24 CART	1.40441
C1	GOBP_POSITIVE_REGULATION_OF_ALPHA_BETA_T_CELL_ACTIVATION	Patient 1_Preinfusion	1.98085
C1	GOBP_POSITIVE_REGULATION_OF_ALPHA_BETA_T_CELL_PROLIFERATION	Patient 2_Preinfusion	2.04317
C1	GOBP_POSITIVE_REGULATION_OF_AUTOPHAGOSOME_MATURATION	Patient 1_Preinfusion	1.64635
C1	GOBP_POSITIVE_REGULATION_OF_BINDING	Patient 2_Day 24 CART	1.40441
C1	GOBP_POSITIVE_REGULATION_OF_BONE_MINERALIZATION	Patient 1_Preinfusion	1.61504
C1	GOBP_POSITIVE_REGULATION_OF_CALCIUM_MEDIATED_SIGNALING	Patient 1_Product	1.66819
C1	GOBP_POSITIVE_REGULATION_OF_CAMP_DEPENDENT_PROTEIN_KINASE_ACTIVITY	Patient 1_Preinfusion	1.65977
C1	GOBP_POSITIVE_REGULATION_OF_CELL_ADHESION	Patient 1_Preinfusion	2.43457
C1	GOBP_POSITIVE_REGULATION_OF_CELL_AGING	Patient 2_Day 24 CART	1.40441
C1	GOBP_POSITIVE_REGULATION_OF_CELL_CELL_ADHESION	Patient 1_Preinfusion	2.30963
C1	GOBP_POSITIVE_REGULATION_OF_CELL_CELL_ADHESION_MEDIATED_BY_INTEGRIN	Patient 2_Preinfusion	1.65466
C1	GOBP_POSITIVE_REGULATION_OF_CELLULAR_COMPONENT_ORGANIZATION	Patient 2_Day 24 CART	1.40441
C1	GOBP_POSITIVE_REGULATION_OF_CYTOKINE_PRODUCTION	Patient 1_Preinfusion	1.87717
C1	GOBP_POSITIVE_REGULATION_OF_DEVELOPMENTAL_PIGMENTATION	Patient 1_Preinfusion	1.68125
C1	GOBP_POSITIVE_REGULATION_OF_ENDOCYTOSIS	Patient 2_Day 24 CART	1.40441
C1	GOBP_POSITIVE_REGULATION_OF_ERK1_AND_ERK2_CASCADE	Patient 1_Preinfusion	2.07321
C1	GOBP_POSITIVE_REGULATION_OF_EXOCYTOSIS	Patient 1_Preinfusion	2.0048
C1	GOBP_POSITIVE_REGULATION_OF_EXTRINSIC_APOPTOTIC_SIGNALING_PATHWAY	Patient 1_Preinfusion	1.97506
C1	GOBP_POSITIVE_REGULATION_OF_GTPASE_ACTIVITY	Patient 1_Preinfusion	2.03947
C1	GOBP_POSITIVE_REGULATION_OF_I_KAPPAB_KINASE_NF_KAPPAB_SIGNALING	Patient 1_Preinfusion	2.33973
C1	GOBP_POSITIVE_REGULATION_OF_INTERLEUKIN_4_PRODUCTION	Patient 3_Preinfusion	1.82558
C1	GOBP_POSITIVE_REGULATION_OF_INTRACELLULAR_SIGNAL_TRANSDUCTION	Patient 1_Preinfusion	1.84336
C1	GOBP_POSITIVE_REGULATION_OF_LEUKOCYTE_CELL_CELL_ADHESION	Patient 1_Preinfusion	2.25882
C1	GOBP_POSITIVE_REGULATION_OF_LEUKOCYTE_PROLIFERATION	Patient 1_Preinfusion	2.29556
C1	GOBP_POSITIVE_REGULATION_OF_LOCOMOTION	Patient 1_Preinfusion	2.39168
C1	GOBP_POSITIVE_REGULATION_OF_MACROPHAGE_CHEMOTAXIS	Patient 1_Preinfusion	1.33339
C1	GOBP_POSITIVE_REGULATION_OF_MULTICELLULAR_ORGANISMAL_PROCESS	Patient 1_Preinfusion	1.72263
C1	GOBP_POSITIVE_REGULATION_OF_MYELINATION	Patient 1_Preinfusion	1.33129
C1	GOBP_POSITIVE_REGULATION_OF_MYOBLAST_PROLIFERATION	Patient 4_Peak CAR T	1.33102
C1	GOBP_POSITIVE_REGULATION_OF_NATURAL_KILLER_CELL_ACTIVATION	Patient 1_Preinfusion	1.71256
C1	GOBP_POSITIVE_REGULATION_OF_NATURAL_KILLER_CELL_MEDIATED_CYTOTOXICITY	Patient 1_Preinfusion	2.06987
C1	GOBP_POSITIVE_REGULATION_OF_NATURAL_KILLER_CELL_MEDIATED_IMMUNITY	Patient 1_Preinfusion	2.06987
C1	GOBP_POSITIVE_REGULATION_OF_NERVOUS_SYSTEM_PROCESS	Patient 1_Preinfusion	1.33129
C1	GOBP_POSITIVE_REGULATION_OF_OSSIFICATION	Patient 1_Preinfusion	1.75958
C1	GOBP_POSITIVE_REGULATION_OF_PEPTIDYL_TYROSINE_PHOSPHORYLATION	Patient 1_Preinfusion	2.03514
C1	GOBP_POSITIVE_REGULATION_OF_PROTEIN_BINDING	Patient 2_Day 24 CART	1.40441
C1	GOBP_POSITIVE_REGULATION_OF_RECEPTOR_BINDING	Patient 2_Day 24 CART	1.40441
C1	GOBP_POSITIVE_REGULATION_OF_RECEPTOR_MEDIATED_ENDOCYTOSIS	Patient 2_Day 24 CART	1.40441
C1	GOBP_POSITIVE_REGULATION_OF_RECEPTOR_SIGNALING_PATHWAY_VIA_STAT	Patient 1_Preinfusion	1.86683
C1	GOBP_POSITIVE_REGULATION_OF_RESPONSE_TO_CYTOKINE_STIMULUS	Patient 1_Preinfusion	2.04575
C1	GOBP_POSITIVE_REGULATION_OF_RESPONSE_TO_EXTERNAL_STIMULUS	Patient 1_Preinfusion	1.69552
C1	GOBP_POSITIVE_REGULATION_OF_SIGNALING	Patient 1_Preinfusion	1.67406
C1	GOBP_POSITIVE_REGULATION_OF_T_CELL_CYTOKINE_PRODUCTION	Patient 2_Day 24 CART	1.40441
C1	GOBP_POSITIVE_REGULATION_OF_T_CELL_MEDIATED_IMMUNITY	Patient 2_Day 24 CART	1.40441
C1	GOBP_POSITIVE_REGULATION_OF_T_CELL_PROLIFERATION	Patient 1_Preinfusion	2.12667
C1	GOBP_POSITIVE_REGULATION_OF_TRANSPORT	Patient 1_Preinfusion	1.85277
C1	GOBP_POSITIVE_REGULATION_OF_VASOCONSTRICTION	Patient 1_Preinfusion	1.77253
C1	GOBP_POST_GOLGI_VESICLE_MEDIATED_TRANSPORT	Patient 1_Preinfusion	2.07236
C1	GOBP_PRODUCTION_OF_MOLECULAR_MEDIATOR_INVOLVED_IN_INFLAMMATORY_RESPONSE	Patient 1_Preinfusion	2.14299
C1	GOBP_PRODUCTION_OF_MOLECULAR_MEDIATOR_OF_IMMUNE_RESPONSE	Patient 2_Day 24 CART	1.40441
C1	GOBP_PROTEIN_COMPLEX_OLIGOMERIZATION	Patient 2_Day 24 CART	1.40441
C1	GOBP_PROTEIN_FOLDING	Patient 2_Day 24 CART	1.40441
C1	GOBP_PROTEIN_HOMOOLIGOMERIZATION	Patient 2_Day 24 CART	1.40441
C1	GOBP_PROTEIN_HOMOTETRAMERIZATION	Patient 2_Day 24 CART	1.40441
C1	GOBP_PROTEIN_LOCALIZATION_TO_CELL_CELL_JUNCTION	Patient 1_Day 7	2.22095
C1	GOBP_PROTEIN_LOCALIZATION_TO_CELL_JUNCTION	Patient 1_Day 7	2.22095
C1	GOBP_PROTEIN_LOCALIZATION_TO_CELL_PERIPHERY	Patient 1_Preinfusion	2.18584
C1	GOBP_PROTEIN_LOCALIZATION_TO_MEMBRANE	Patient 4_Peak	3.16734
C1	GOBP_PROTEIN_LOCALIZATION_TO_ORGANELLE	Patient 4_Peak	2.4135
C1	GOBP_PROTEIN_LOCALIZATION_TO_PLASMA_MEMBRANE	Patient 1_Preinfusion	2.25099
C1	GOBP_PROTEIN_REFOLDING	Patient 2_Day 24 CART	1.40441
C1	GOBP_PROTEIN_TARGETING	Patient 4_Peak	3.53202
C1	GOBP_PROTEIN_TETRAMERIZATION	Patient 2_Day 24 CART	1.40441
C1	GOBP_PYROPTOSIS	Patient 4_Peak	1.33522
C1	GOBP_RECEPTOR_SIGNALING_PATHWAY_VIA_STAT	Patient 1_Preinfusion	2.13746
C1	GOBP_REGULATION_OF_ALPHA_BETA_T_CELL_ACTIVATION	Patient 1_Preinfusion	1.97535
C1	GOBP_REGULATION_OF_AUTOPHAGOSOME_MATURATION	Patient 1_Preinfusion	1.64635
C1	GOBP_REGULATION_OF_BIOLOGICAL_PROCESS_INVOLVED_IN_SYMBIOTIC_INTERACTION	Patient 1_Preinfusion	1.81358
C1	GOBP_REGULATION_OF_CATION_CHANNEL_ACTIVITY	Patient 1_Preinfusion	2.11251
C1	GOBP_REGULATION_OF_CATION_TRANSMEMBRANE_TRANSPORT	Patient 1_Preinfusion	2.01159
C1	GOBP_REGULATION_OF_CD8_POSITIVE_ALPHA_BETA_T_CELL_ACTIVATION	Patient 4_Peak CAR T	1.7517
C1	GOBP_REGULATION_OF_CELL_AGING	Patient 2_Day 24 CART	1.40441
C1	GOBP_REGULATION_OF_CELL_PROJECTION_ORGANIZATION	Patient 2_Day 24 CART	1.40441
C1	GOBP_REGULATION_OF_CELLULAR_RESPONSE_TO_STRESS	Patient 2_Day 24 CART	1.40441
C1	GOBP_REGULATION_OF_CHEMOKINE_MEDIATED_SIGNALING_PATHWAY	Patient 1_Preinfusion	1.33339
C1	GOBP_REGULATION_OF_DEVELOPMENTAL_PIGMENTATION	Patient 1_Preinfusion	1.68125
C1	GOBP_REGULATION_OF_DNA_BINDING_TRANSCRIPTION_FACTOR_ACTIVITY	Patient 1_Preinfusion	1.79261
C1	GOBP_REGULATION_OF_EPITHELIAL_CELL_DIFFERENTIATION	Patient 1_Preinfusion	2.20537
C1	GOBP_REGULATION_OF_ERYTHROCYTE_DIFFERENTIATION	Patient 2_Day 24 CART	1.40441
C1	GOBP_REGULATION_OF_ESTABLISHMENT_OR_MAINTENANCE_OF_CELL_POLARITY	Patient 1_Preinfusion	1.92854
C1	GOBP_REGULATION_OF_EXOCYTOSIS	Patient 1_Preinfusion	2.13881
C1	GOBP_REGULATION_OF_FAT_CELL_DIFFERENTIATION	Patient 4_Peak CAR T	1.95202
C1	GOBP_REGULATION_OF_FOREBRAIN_NEURON_DIFFERENTIATION	Patient 2_Day 24 CART	1.40441
C1	GOBP_REGULATION_OF_HOMOTYPIC_CELL_CELL_ADHESION	Patient 1_Preinfusion	1.78152
C1	GOBP_REGULATION_OF_HORMONE_SECRETION	Patient 3_Preinfusion	2.11579
C1	GOBP_REGULATION_OF_ION_TRANSPORT	Patient 1_Preinfusion	1.63601
C1	GOBP_REGULATION_OF_IRON_ION_TRANSPORT	Patient 2_Day 24 CART	1.40441
C1	GOBP_REGULATION_OF_LEUKOCYTE_MIGRATION	Patient 1_Product	2.05287
C1	GOBP_REGULATION_OF_LEUKOCYTE_PROLIFERATION	Patient 1_Preinfusion	2.46907
C1	GOBP_REGULATION_OF_LIPOPOLYSACCHARIDE_MEDIATED_SIGNALING_PATHWAY	Patient 4_Peak CAR T	1.73804
C1	GOBP_REGULATION_OF_LYMPHOCYTE_APOPTOTIC_PROCESS	Patient 1_Preinfusion	1.94728
C1	GOBP_REGULATION_OF_LYMPHOCYTE_MEDIATED_IMMUNITY	Patient 2_Day 24 CART	1.40441
C1	GOBP_REGULATION_OF_MACROPHAGE_CHEMOTAXIS	Patient 1_Preinfusion	1.33339
C1	GOBP_REGULATION_OF_MICROGLIAL_CELL_ACTIVATION	Patient 1_Product	1.83579
C1	GOBP_REGULATION_OF_MULTI_ORGANISM_PROCESS	Patient 1_Preinfusion	1.72196
C1	GOBP_REGULATION_OF_MYELOID_DENDRITIC_CELL_ACTIVATION	Patient 1_Preinfusion	1.64456
C1	GOBP_REGULATION_OF_MYOBLAST_PROLIFERATION	Patient 4_Peak CAR T	1.33102
C1	GOBP_REGULATION_OF_NATURAL_KILLER_CELL_DIFFERENTIATION	Patient 4_Peak CAR T	1.82533
C1	GOBP_REGULATION_OF_NEURON_DIFFERENTIATION	Patient 2_Day 24 CART	1.40441
C1	GOBP_REGULATION_OF_NEURON_PROJECTION_DEVELOPMENT	Patient 2_Day 24 CART	1.40441
C1	GOBP_REGULATION_OF_NUCLEAR_TRANSCRIBED_MRNA_CATABOLIC_PROCESS_DEADENYLATION_DEPENDENT_DECAY	Patient 4_Peak CAR T	2.05575
C1	GOBP_REGULATION_OF_NUCLEAR_TRANSCRIBED_MRNA_POLY_A_TAIL_SHORTENING	Patient 4_Peak CAR T	2.05575
C1	GOBP_REGULATION_OF_OSTEOCLAST_DIFFERENTIATION	Patient 1_Preinfusion	1.75749
C1	GOBP_REGULATION_OF_PHOSPHATIDYLINOSITOL_3_KINASE_SIGNALING	Patient 3_Preinfusion	2.20377
C1	GOBP_REGULATION_OF_PROGRAMMED_NECROTIC_CELL_DEATH	Patient 1_Preinfusion	1.90088
C1	GOBP_REGULATION_OF_RECEPTOR_BINDING	Patient 2_Day 24 CART	1.40441
C1	GOBP_REGULATION_OF_RECEPTOR_SIGNALING_PATHWAY_VIA_STAT	Patient 1_Preinfusion	2.04272
C1	GOBP_REGULATION_OF_RESPONSE_TO_CYTOKINE_STIMULUS	Patient 1_Preinfusion	2.43942
C1	GOBP_REGULATION_OF_RESPONSE_TO_STRESS	Patient 2_Day 24 CART	1.40441
C1	GOBP_REGULATION_OF_SECRETION	Patient 1_Preinfusion	1.8067
C1	GOBP_REGULATION_OF_SYSTEMIC_ARTERIAL_BLOOD_PRESSURE	Patient 1_Preinfusion	1.73153
C1	GOBP_REGULATION_OF_SYSTEMIC_ARTERIAL_BLOOD_PRESSURE_MEDIATED_BY_A_CHEMICAL_SIGNAL	Patient 1_Preinfusion	1.73153
C1	GOBP_REGULATION_OF_TISSUE_REMODELING	Patient 1_Preinfusion	2.05668
C1	GOBP_REGULATION_OF_TRANSMEMBRANE_TRANSPORT	Patient 1_Preinfusion	1.85185
C1	GOBP_REGULATION_OF_TRANSPORT	Patient 1_Preinfusion	1.55667
C1	GOBP_REGULATION_OF_VASOCONSTRICTION	Patient 1_Preinfusion	1.77253
C1	GOBP_REGULATION_OF_VESICLE_MEDIATED_TRANSPORT	Patient 1_Preinfusion	1.93249
C1	GOBP_REGULATION_OF_VIRAL_LIFE_CYCLE	Patient 1_Preinfusion	1.92847
C1	GOBP_RESPONSE_TO_CHEMOKINE	Patient 1_Preinfusion	1.86724
C1	GOBP_RESPONSE_TO_CYTOKINE	Patient 1_Preinfusion	1.85222
C1	GOBP_RESPONSE_TO_INTERFERON_BETA	Patient 1_Preinfusion	2.01026
C1	GOBP_RESPONSE_TO_INTERLEUKIN_9	Patient 1_Preinfusion	1.75017
C1	GOBP_RESPONSE_TO_IRON_III_ION	Patient 2_Day 24 CART	1.40441
C1	GOBP_RESPONSE_TO_IRON_ION	Patient 2_Day 24 CART	1.40441
C1	GOBP_RESPONSE_TO_MOLECULE_OF_BACTERIAL_ORIGIN	Patient 2_Day 24 CART	1.40441
C1	GOBP_RESPONSE_TO_NICOTINE	Patient 2_Day 24 CART	1.40441
C1	GOBP_RESPONSE_TO_PROSTAGLANDIN_E	Patient 4_Peak CAR T	1.78892
C1	GOBP_RESPONSE_TO_TUMOR_NECROSIS_FACTOR	Patient 1_Product	2.2153
C1	GOBP_RESPONSE_TO_TYPE_I_INTERFERON	Patient 1_Preinfusion	2.92964
C1	GOBP_RESPONSE_TO_VIRUS	Patient 1_Preinfusion	2.27854
C1	GOBP_RETINA_HOMEOSTASIS	Patient 2_Day 24 CART	1.64373
C1	GOBP_RIBOSOMAL_SMALL_SUBUNIT_BIOGENESIS	Patient 4_Peak	2.12749
C1	GOBP_RIBOSOME_ASSEMBLY	Patient 2_Preinfusion	2.07459
C1	GOBP_RIBOSOME_BIOGENESIS	Patient 4_Peak	2.11553
C1	GOBP_RNA_CATABOLIC_PROCESS	Patient 4_Peak	2.10667
C1	GOBP_RRNA_METABOLIC_PROCESS	Patient 4_Peak	2.17926
C1	GOBP_SECRETION	Patient 1_Preinfusion	1.4986
C1	GOBP_SIGNAL_RELEASE	Patient 1_Preinfusion	1.95661
C1	GOBP_SMOOTH_MUSCLE_CONTRACTION	Patient 1_Preinfusion	1.96185
C1	GOBP_SUPEROXIDE_ANION_GENERATION	Patient 4_Peak CAR T	1.85603
C1	GOBP_SUPRAMOLECULAR_FIBER_ORGANIZATION	Patient 2_Day 24 CART	1.40441
C1	GOBP_T_CELL_CHEMOTAXIS	Patient 1_Product	1.84175
C1	GOBP_TISSUE_HOMEOSTASIS	Patient 2_Day 24 CART	1.64373
C1	GOBP_TISSUE_REMODELING	Patient 1_Preinfusion	2.57051
C1	GOBP_TUBE_MORPHOGENESIS	Patient 1_Preinfusion	1.79911
C1	GOBP_VASOCONSTRICTION	Patient 1_Preinfusion	1.77253
C1	GOBP_VIRAL_GENE_EXPRESSION	Patient 4_Peak	3.44743
[truncated: 12,595 more rows]

## Sheet: GSEA_endog_CARpos_postinf
GSEA using genes from differnetial expresison analysis between circulating CAR+ CD8+ and CAR- CD8+ T cells.
pathway	gene_set	type	cluster	NES	pval	leading_edge	padj	log2err	ES	size	NESposneg
ZBTB7B_TARGET_GENES	c3_tft_v7	CART	C3	1.31518	3.44944e-05	SPC24, SYT5, ADPRHL1, TMEM232, AURKB, TTK, HSD17B6, S100A2, AGBL3, TST, ZNF441, DNAH6, BBS12, KLHDC9, TIGD4, TYMS, LINC02166, IQCK, LINC01765, PCLAF, DNAJC28, ETV1, SAXO2, TSACC, OSCP1, CFAP58, LRTOMT, PRDM8, LINC00271, ADGRF3, TTC25, NPHP4, TEX9, CCNB1, PKIG, ZNF823, PAIP2B, KPTN, MOK, LRRIQ3, THNSL1, RBKS, LINC01006, LEKR1, DLGAP5, ZMIZ1-AS1, SH2D3A, ZNF20, C9orf24, EML6, FBXO15, NME7, AC124068…	0.0130044	0.557332	0.28404	1599	1.31518
YTATTTTNR_MEF2_02	c3_tft_v7	CARneg	C4	1.50518	0.000143148	EPHX4, CREB5, MGLL, KLF3, NFIX, C1orf21, TFAP2A, PALLD, SIRPA, SCML1, NFIA, KIF13A, SEMA6A, HLX, SLC25A34, RHBDL3, MLF1, NR4A1, ADAMTS14, RAB20, MORC4, LYN, GPR27, HDAC9, PDGFA, EBF1, MB, MPP7, IGSF9B, NCAM1, AK8, PRKAR2B, MYO9A, GPLD1, TCEAL9, FGFBP2, ZBTB18, EDN1, DMD, DGKB, BOLL, BARX2, ADAM23, PPM1L, FOS, CNTN2, KYNU, CEBPB, EEF1A2, RFX3, RGL1, KCNA3, RNF24, TMEM182, ID2, NEURL2, KLB, EPN2, M…	0.0179889	0.518848	-0.386175	438	-1.50518
YNGTTNNNATT_UNKNOWN	c3_tft_v7	CARneg	C2	1.43026	0.000981141	HOXC4, LRMDA, TSHZ3, FAM110B, OMG, FES, NFIX, CDC25A, FGF9, MAML3, POU3F1, NTRK1, PLCB1, ASPA, PLEKHA5, KCTD15, WNT2B, EDA, GPR15, MXI1, SOX5, OLFML3, BCL2, EHD4, RBM47, LY6G5B, CHN2, RUNX1, ELOVL6, GARNL3, THRB, SLC24A2, PRR11, GNAO1, GADD45G, GPATCH11, STARD13, MAGI1, KIF13A, HOXB8, GABRG2, FOXP2, DMD, DLC1, CNTNAP2, HID1, RYR1, KLF9, S1PR1, ARL4C, RGS3, NEDD4, ZNF641, SP4, ZBTB37, RAD51AP1, HI…	0.0734547	0.45506	-0.439066	230	-1.43026
WGTTNNNNNAAA_UNKNOWN	c3_tft_v7	CARneg	C4	1.64955	1.64517e-06	VCAN, CREB5, PPP2R2B, PLXDC2, KLF3, TCF4, TFAP2A, SIRPA, NFIA, KIF13A, RBMS3, HLX, DENND5A, SLC25A34, PITX1, CISH, CDC42EP4, CC2D2B, VEGFA, CHN2, DPF3, HDAC9, MAF, ETV5, RIN2, INMT, MAP1B, NCAM1, KLHL32, DHRS3, HOXC4, TFEC, ZBTB18, SH3D21, DMD, CTNNA3, BASP1, SKAP2, SOCS2, FOS, CEBPB, TOX2, DRP2, UBE2E2, RFX3, ARHGEF12, RASGRP3, ARHGAP12, KCNMA1, GAD1, ZEB2, MXI1, ATXN7L2, IL10, PIK3R1, NR4A2, SS…	0.000930342	0.643552	-0.430451	354	-1.64955
WGTTNNNNNAAA_UNKNOWN	c3_tft_v7	CARneg	C5	1.48901	0.000430097	VCAN, NCAM1, PPP2R2B, NFIA, TCF4, SOCS2, CISH, PEX11A, VEGFA, MAF, KLF3, PLXDC2, RHOBTB3, TOX2, MXI1, CREB5, CDK14, KCNJ13, C1QTNF7, FOS, ZNF485, SLC25A34, HDAC9, DHRS3, ZEB2, WDR47, CCDC71L, UBXN10, CEBPB, RASGRP3, GDPD5, NR2F6, SSBP3, CDKN2C, SSBP2, DUSP6, BCL6, SKAP2, ITGA10, HMGN5, LPP, SLC23A3, SIRPA, CALD1, SLC25A18, NOVA1, INMT, PRKN, NRXN3, MAP1B, KCNMA1, PRDM1, POMZP3, SLC12A8, PITX1, PA…	0.0315404	0.498493	-0.375786	335	-1.48901
WGTTNNNNNAAA_UNKNOWN	c3_tft_v7	CARneg	C2	1.3772	0.0017448	VCAN, HOXC4, NCAM1, CDKN1A, CISH, CREB5, BASP1, PLXDC2, PPP2R2B, TOX2, FGF7, TCF4, KLF3, CDC25A, SOCS2, HLX, TFAP2A, MAML3, SIRPA, NFIA, UBE2E2, MAP1B, HDAC9, KLF7, PITX1, PCDH11X, SPC25, MPPED2, NOVA1, MCAM, RASGRP3, MAF, MXI1, ZEB2, GDPD5, KLF5, SKAP2, RGS13, WDR47, B3GLCT, BCL6, CDKL5, RHOQ, PRKN, CHN2, PTPRF, VEGFA, SLC20A1, GRM8, PAX6, FZD7, CEBPB, FOS, KLHL32, KIF13A, KCNMA1, FOXP2, DMD, AD…	0.0952434	0.45506	-0.41669	350	-1.3772
VDR_Q6	c3_tft_v7	CARneg	C4	1.65304	0.000221635	VCAN, SLC4A4, PPP2R2B, SLC7A7, PCSK1N, ADGRL1, GRM3, SCML1, KIF13A, SIX4, RASIP1, NEO1, HOXC4, ZNF219, ZNF503, SOX5, CEBPB, NECTIN1, TMEM150A, HHEX, CDK18, INCA1, PTCH1, FBXL19-AS1, TSC22D3, CCDC120, PIK3R1, USP49, CLOCK, SSBP3, LINS1, KLF4, ADAMTS4, CDKN2B, ARHGEF7, PPP4R1	0.025067	0.518848	-0.461311	182	-1.65304
TTAYRTAA_E4BP4_01	c3_tft_v7	CARneg	C5	1.59484	0.000888086	ADRB2, NPTX1, EPHX4, FRY, ELOVL6, PELI2, CREB5, TBX6, LARGE1, RAP2B, KCNJ13, C1QTNF7, GRHL1, ING1, TSC22D3, WDR47, PIK3R3, BCL6, LGALSL, CD40LG, COL15A1, MYLK, WEE1, HERPUD1, ZNF572, NREP, BCL11A, EPN2, TFEB, KLF9, NFIL3, DNAJA2, MIR22HG, CRIM1, NMT2, MPP6, GNPNAT1, TFDP2, NR1D1, PRNP, HIVEP3, AP1S2, FAM76A, NAPEPLD, TOB1, TRIM8, FBXW7, SIDT1, CHIC2, CALM1, PURA, RHOBTB2, MBNL2, MID1IP1, CDKL1, H…	0.0424737	0.477271	-0.424121	164	-1.59484
TTANTCA_UNKNOWN	c3_tft_v7	CARneg	C5	1.39074	0.000495701	FCER1G, VCAN, PPP2R2B, MYO3B, TSHZ3, RAB11FIP5, CD68, TIMP1, PTCH1, IL18RAP, VEGFA, KCTD15, SOBP, SOX5, CPNE5, ERRFI1, SLC37A4, PPM1L, SEZ6, NLRP3, NR3C2, LRMDA, CREB5, CDK14, LARGE1, ACP6, JAKMIP2, JUP, KIF5A, EFNA5, ACKR3, GATA6, TNFSF4, PAK3, ZNF485, LTBP2, GPR150, CRYBG2, PIM1, CD226, FOSL2, KCNA3, ATP10D, ZEB2, MAP2K1, UBXN10, CEBPB, ELMO3, PIK3R3, CDKN2C, CEBPA, DUSP6, FSIP2, OMG, STRADB, T…	0.0320748	0.477271	-0.342516	560	-1.39074
TGTTTGY_HNF3_Q6	c3_tft_v7	CARneg	C5	1.5305	4.82815e-05	NCAM1, SVIL, PPP2R2B, SMAD5, TSHZ3, CD68, NFIA, TCF7L2, PTCH1, TCF4, A2M, RBM47, COLGALT2, ASCL2, SOBP, PTGER2, KLF3, SOX5, ERRFI1, DUSP8, ZNF436, GABRE, MXI1, CREB5, CDK14, IL18, ZNF395, IRS1, EFNA5, GATA6, NEUROD2, KCNJ13, GRHL1, ID2, NEK6, ZNF485, ZNF462, TF, GPR150, DEPDC7, TSC22D3, ZEB2, CEP70, NOS3, IL5RA, DUSP6, ESR1, BCL6, OMG, METTL18, MGLL, IL4, ADAMTS10, CCDC30, CALD1, SEMA4C, ABCF2, N…	0.00691611	0.557332	-0.380869	415	-1.5305
TGTTTGY_HNF3_Q6	c3_tft_v7	CARneg	C4	1.41558	0.000942813	TCF7L2, CREB5, RBM47, IL4, PPP2R2B, IL5RA, MGLL, KLF3, TCF4, COLGALT2, HAVCR1, NFIA, SMAD5, KIF13A, GATA6, EGR2, ZNF462, SEMA6A, ARHGAP32, ADGRB2, CRABP2, NEK6, TSHZ3, SEMA4C, SGK1, CHN2, ASCL2, SESN3, NCAM1, AL162293.1, DUSP1, GPLD1, HOXC4, TFEC, ZBTB18, SOX5, RBM11, MAPK10, DMD, CD68, PLEKHA5, RFX3, MYLK, DUSP8, EFNA5, PTCH1, TMEM182, ID2, TGFBR1, IRS1, GRHL1, ZEB2, EPN2, MXI1, FOSB, SERPINF1, …	0.0592401	0.477271	-0.363138	440	-1.41558
TGFB_UP.V1_UP	c6_all_v7	CARneg	C4	1.61429	0.000651121	PPP2R2B, CYP2J2, TAGLN, CLCF1, IL1RL1, PHLDB1, HLX, SNAI1, SGK1, FOXD1, SLC17A3, PDGFA, LTBP2, BRDT, RRAD, EDN1, DLC1, DPY19L1, ARHGAP12, PPARD, CAPRIN2, IRS1, LIF, ABCG1, ATF3, SLC26A2, SSBP3, ADAM22, KLF4, PLEKHA1, CDKN2B, SPHK1, JMJD6, TUBB4A, LMCD1, NCOR2, BMPR2, SMURF2	0.0130644	0.477271	-0.474775	120	-1.61429
TGFB_UP.V1_UP	c6_all_v7	CARneg	C2	1.51104	0.00415737	BRDT, PPP2R2B, LMCD1, ATF3, FERMT2, HLX, CDKN2B, ABTB2, IL1RL1, IRS1, DPY19L1, KLF7, SMTN, FOXD1, SNAI1, RHOB, SMOX, AKAP12, PMEPA1, PDGFA, NDST1, TFEB, LRP12, KANK1, RGS11, MPZL2, JAM2, DLC1, ACSBG1, PLEKHA1, CLCF1, SEC14L2, CAPRIN2, ZCCHC14, SSBP3, ITGA5, JUNB, RRAD, PHLDB1, BHLHE40, UBL3, TAGLN, ADAM22, NCOR2, TLE3, CDK17, CCDC93, CYP2J2, CYTH1	0.0357156	0.407018	-0.481172	120	-1.51104
TGFB_UP.V1_UP	c6_all_v7	CARneg	C3	1.45703	0.0126599	CLCF1, HLX, BRDT, PPP2R2B, SPHK1, ATF3, LTBP2, CASP5, TAGLN, RHOB, CDKN2B, SMTN, DPY19L1, PDGFA, DLC1, RUSC2, RGS11, RRAD, FERMT2, UBL3, IRS1, KLF4, SOCS6, MED18, SEC14L2, RGCC, ARHGAP12, SSBP3, ANK1, KLF7, JUNB, RGS12	0.0613518	0.38073	-0.377429	116	-1.45703
TGFB_UP.V1_DN	c6_all_v7	CARneg	C3	1.55173	0.00185573	RBM47, RIMS2, ADRB2, MYBL1, IFIT1, MN1, IFIT3, ID1, AVPI1, FSTL3, IRF5, RGL1, PRX, NRSN2, PTCH1, BCL6, FAM13A, IFIT2, PLEKHF1, ZNF395, FNDC3B, TUFT1, ZNF184, HILPDA, VAV3, FRAT2, SAP30, FRMD4B, MIR22HG, GNE, STK38L	0.0194851	0.45506	-0.395219	134	-1.55173
TGFB_UP.V1_DN	c6_all_v7	CARneg	C5	1.41622	0.0144405	MYBL1, ADRB2, PTCH1, RBM47, IRF5, IFIT3, FNDC3B, PLEKHF1, ZNF395, ACKR3, ID2, TF, FAM13A, PIK3R3, DUSP6, SAP30, BCL6, RAB38, HSPG2, IFIT2, TMCC2, PCBP3, TLR5, RIMS2, HS3ST1, CXADR, ADAMTS1, MRPS6, UPK2, EVI2A, MIR22HG, FRAT2	0.0682315	0.38073	-0.390666	128	-1.41622
Terminally.exhausted	Curated	CARneg	C2	1.6497	4.91519e-05	SLCO4C1, FGL2, CELA1, CISH, TMCC3, MRC2, ADRB1, CD200R1, LAT2, SOCS2, ARAP3, CMKLR1, ADGRG1, NEB, SPC25, ITGAX, CX3CR1, CDCA8, METRNL, SPAG5, MAF, BUB1, E2F7, TTK, FAXC, RMDN2, HIST1H2AH, S1PR5, STIL, IRF8, TRGV2, CHN2, SLC16A10, CCL4, TG, CALCB, PRR5L, TMEM163, DENND5A, SLAMF1, NEDD4, CDK14, HIST1H2AI, MYADM, NCAPG, ESCO2, CEP55, HIST1H2AG, HIST1H2AB, GPLD1	0.000294912	0.557332	-0.530787	125	-1.6497
Terminally.exhausted	Curated	CARneg	C6	1.62735	0.00119185	MAF, FGL2, IL10, CISH, SLC16A10, PLEKHF1, CELA1, CD200R1, NCAPG, ADGRG1, ITGAX, METRNL, SLAMF1, CD7, CDK6, KIF2C, CALCB, TMCC3, STIL, ICA1, HIST1H2AH, EPDR1, E2F7, CCRL2, CCL4, UBE2C, CXCR6, PRDM1, F2R, S1PR5, NCF1, HIST1H2AB, CDCA5, COCH, AURKB, DENND5A, RRM2, SOCS2, ASPM	0.00429064	0.45506	-0.408806	103	-1.62735
Terminally.exhausted	Curated	CARneg	C5	1.5374	0.00412244	TMCC3, SLCO4C1, SOCS2, FGL2, NEB, CISH, TRGV2, GAS2L3, MAF, ADGRG1, PBK, PLEKHF1, CX3CR1, TKTL1, CCL4, CDK14, LAT2, SPAG5, ITGAX, S1PR5, CDKN2C, METRNL, ESCO2, CD200R1, EPDR1, PRDM1, TMEM163, FAXC, CELA1, CDK1, RMDN2, TTK, IRF8, CDCA8, DAPK2, F2R, ADAM8, DENND5A, CCNA2, ASPM, CEP55	0.0247346	0.407018	-0.422759	120	-1.5374
Terminally.exhausted	Curated	CARneg	C4	1.45979	0.0113822	TMCC3, ADRB1, FGL2, SLCO4C1, TRGV2, DENND5A, CISH, ADGRG1, CD200R1, CHN2, PLEKHF1, ITIH5, MAF, GAS2L3, GPLD1, METRNL, NEB, ITGAX, CX3CR1, S1PR5, SOCS2, MRC2, CCRL2, CCL4, RMDN2, IL10, ADAM8, CDK6, PRDM1, NEDD4	0.0491757	0.38073	-0.42566	124	-1.45979
Terminally.exhausted	Curated	CARneg	C3	1.36795	0.0286995	SLCO4C1, FGL2, MRC2, ADRB1, SOCS2, TMCC3, MAF, METRNL, S1PR5, CMKLR1, ITIH5, ITGAX, ADGRG1, CD200R1, TMEM163, E2F7, CX3CR1, IRF8, RMDN2, PRC1, SPAG5, HIST1H2AB, PLEKHF1, TRGV2, CCL4, FAXC, CCRL2, FRMD4B, GAS2L3, CD244, ARAP3, DENND5A, CISH, NCAPG, CHN2, CDKN2C, TKTL1, HIST1H2AG, F2R, DUSP5, PTGER4	0.0737986	0.352488	-0.351386	122	-1.36795
Tcell.exhaustion..ZhangCell2017.	Curated	CART	C1	2.25618	6.75379e-08	CXCR6, CD27, AFAP1L2, MYO1E, ID3, LAYN, NDFIP2, SIRPG, MYO7A, TIGIT, ENTPD1, PHLDA1, CTLA4, LYST, CCL3, TNFRSF9, HAVCR2, NAB1, DUSP4, GALM, CSF1, FKBP1A, SNX9, FUT8, PDCD1, SNAP47, ICOS, MTHFD1, ACP5, MTHFD2, VCAM1	1.21568e-06	0.704976	0.600447	76	2.25618
Tcell.exhaustion..ZhangCell2017.	Curated	CART	C3	1.79217	0.000159001	ID3, CD27, MYO7A, AFAP1L2, NDFIP2, CXCR6, ENTPD1, LINC00299, TNFRSF9, SIRPG, LAYN, TIGIT, LYST, SNX9, DUSP4, MTHFD1, NAB1, GALM, CCL3, FKBP1A, CSF1, ICOS, VCAM1, YARS, PARK7, CTLA4, ACP5, PKM, ENTPD1-AS1, HAVCR2, FUT8	0.000572403	0.518848	0.521027	75	1.79217
TCCATTKW_UNKNOWN	c3_tft_v7	CARneg	C5	1.61725	0.000547747	CLU, JDP2, DST, GNAO1, PWP2, SOBP, CACNA1D, SOX5, SLC48A1, SCML1, SORBS2, CCDC88A, JAKMIP2, ACKR3, NR4A1, IGF2BP1, SPAG5, ZNF502, MIR503HG, BEX2, CCDC92, SSBP3, DUSP6, FSIP2, OMG, HSPG2, CALD1, PRDM1, FAXC, CXADR, CDKL5, NDST2, CAMLG, CFL2, NR3C1, TFDP2, ACVR2A	0.0334734	0.477271	-0.430081	164	-1.61725
TBK1.DF_UP	c6_all_v7	CARneg	C3	1.3411	0.0163021	VCAN, TNFAIP2, SIRPA, MYBL1, KLF11, PLAUR, ATF3, PEG10, ANPEP, RIN2, ITGAV, DPY19L1, ADGRG1, GCA, TGFA, CCDC68, C3orf52, FERMT2, HSPA2, SNX24, TPST1, MEX3D, TUFT1, CKB, RUNX1, BBS1, NFIL3, TMED5, ARAP3, HBEGF, RABGEF1, GRINA, MAST4, CREM, TP53BP2, LIPT1, OSTM1, DUSP5, STX3, LAPTM4A, ENDOD1, LRP12, VAMP3, PKNOX1, CRIP2, PAQR3, NFYA, MICA, SLC2A3	0.0716536	0.352488	-0.319336	228	-1.3411
TATA_C	c3_tft_v7	CARneg	C5	1.66453	0.000257901	SVIL, PDGFRB, TCF4, GADD45G, SETBP1, KCTD15, MAF, CA2, SOX5, ERRFI1, AGPAT4, AMDHD1, MT3, KCNA3, PANK1, PPP1R10, ELMO3, INVS, SSBP3, CDC42EP2, CD24, CITED1, MYLK, TGFBR1, PRDM1, HERPUD1, SEMA3A, RASL11B, LMO2, ATP6V1G3, PRKAR2B, HOXB9, ATF3, PKIA, ANXA1, CFL2, CALCOCO1, TSHZ1, MYH11, HOXC4, CCDC91, NSMCE3, JUND, HIVEP3, WSB2, PRPF4, PPARGC1B, TOB1, HOXB4	0.0218224	0.498493	-0.445025	149	-1.66453
T.CELL	Curated	CART	C1	1.64507	0.000741968	CXCR6, CD28, CD27, ASB2, SIRPG, CXCR3, TIGIT, CTLA4, PAG1, SH2D1A, SIT1, DENND2D	0.00445181	0.477271	0.418257	96	1.64507
T.CD8	Curated	CART	C1	2.18435	4.05187e-06	NELL2, CD27, TIMD4, CCDC141, GZMK, ASB2, SIRPG, TTN, TIGIT, PAG1, LYST, TNFRSF9, SIT1, CD84, TTC24, CBLB, PDCD1, SNAP47	3.64668e-05	0.610527	0.635251	46	2.18435
T.CD8	Curated	CART	C3	2.11354	7.65233e-07	TIMD4, CD27, NELL2, CCDC141, ZBED2, GZMK, TTN, ASB2, PAG1, TNFRSF9, SIRPG, TIGIT, LYST, SIT1, CBLB, CD84	6.8871e-06	0.659444	0.665554	46	2.11354
T.CD8	Curated	CART	C5	1.51209	0.0188657	TIMD4, ASB2, TIGIT, CD27, CCDC141, TNIP3, GZMK, LYST, TTN, SIRPG, LAG3, PAG1, CBLB, NELL2, TTC24	0.0793844	0.352488	0.41174	46	1.51209
T.CD4	Curated	CARneg	C6	1.90688	0.000278903	MAF, MAL, CD40LG, SUSD3, DUSP16, IL7R, SLAMF1, TNIK, TPT1, IL6R, EML4, CCR4, TNFAIP3, SPOCK2, TESPA1, PIK3IP1, FLT3LG, ICOS, FAM102A, TNFSF8, ITK	0.00167342	0.498493	-0.574021	40	-1.90688
T.CD4	Curated	CART	C1	1.73422	0.00175523	F5, CD28, FAAH2, TIAM1, CCR4, SUSD3, IL6R, PASK, DUSP16, CD40LG, FAM102A, FBLN7	0.00789855	0.45506	0.512235	43	1.73422
SUPT20H_TARGET_GENES	c3_tft_v7	CART	C3	1.28118	0.00046729	SPC24, ADPRHL1, PHLPP1, TMEM63C, TRIP10, CDCA3, PCLAF, OAZ3, RGS5, NR1H3, HEXA-AS1, MOK, CENPQ, ATP13A4, AC124068.2, HASPIN, LGALS3BP, LYSMD1, MMACHC, CCT6B, TRIM46, PPP1R13L, NIF3L1, TTC26, NPM3, ACP2, KIF15, ZGRF1, SLC27A5, AL451050.2, ENPP3, FAM71E1, SELP, POLA2, FBXL19, XRCC2, TCF19, NMNAT1, DUS2, RAD51AP1, ACOX3, TACO1, RAB11B-AS1, CEP128, DZANK1, ACOT8, WDR4, ZNF491, BRCA1, GATB, ALDH6A1, N…	0.0660631	0.498493	0.282232	1144	1.28118
suppresive_regulatory	Curated	CARneg	C3	1.71006	0.0107867	KIR3DL2, FOXP3, CD160, IL4, BTLA	0.0323601	0.38073	-0.681375	13	-1.71006
suppresive_regulatory	Curated	CARneg	C5	1.5713	0.0220512	KIR3DL2, KLRG1, BTLA, CD160, IL4, KIR2DL4	0.0793844	0.352488	-0.669065	12	-1.5713
suppresive_regulatory	Curated	CARneg	C4	1.54692	0.0227201	IL4, BTLA, KIR3DL2, CD160, IL10, KLRG1	0.0681603	0.352488	-0.683696	13	-1.54692
STK33_UP	c6_all_v7	CARneg	C3	1.81872	1.44706e-06	CD36, CDKN1A, LRRC25, CREB5, AQP9, FGL2, ADM, C5AR1, KIAA0895, FCHO2, LPAR6, TNF, RIN2, ABCA1, RHOB, TFEC, SETBP1, KYNU, FAM20C, BMF, TTLL7, CD101, GPR137C, LFNG, BCL6, DUSP1, ZEB2, ATP2B1-AS1, SULF2, SOCS6, CCL4, GPR135, DUSP8, TLR1, MIR22HG, NCF2, ZBTB6, FOS, HBEGF, ZFP36, NCEH1, GPR65, SIPA1L2, SNX16, JUNB, MIDN, EGR1, MILR1, OSTM1, SMIM14, SYNJ1, DUSP5, ARRDC3, SLC7A11, MFAP3, RGS2, LIMK1	5.46988e-05	0.643552	-0.435686	213	-1.81872
STK33_UP	c6_all_v7	CARneg	C4	1.72331	7.67099e-06	CD36, LRRC25, CREB5, C5AR1, HBEGF, FGL2, AQP9, FAM20C, EGR2, SGK1, LPAR6, RIN2, ADORA3, DUSP1, ATP2B1-AS1, TFEC, ZBTB18, VSIG4, ADM, ABCA1, FOS, KYNU, LFNG, TTC30B, MIR22HG, NRP1, FCHO2, DUSP8, RASGRP3, CD101, TNF, ZEB2, CCL4, SNX16, SMIM14, SETBP1, SOS1, ZFP36, CDKN1B, ZBTB6, RGS2, SYNJ1, PRTFDC1, GPR65, BCL6, SIPA1L2, MFAP3, ARRDC3, SAMD9L, CDKN1A, PLCXD2, MIDN, BTG2, ACSM3, ARL5B, GLCE, SLC38A…	0.000372453	0.593325	-0.47107	216	-1.72331
STK33_UP	c6_all_v7	CARneg	C2	1.51829	0.000197707	FGL2, CD36, CDKN1A, SETBP1, CREB5, TNF, ADM, SLC7A11, LRRC25, SULF2, CD101, C5AR1, NRP1, ABCA1, LPAR6, LFNG, FCHO2, RASGRP3, RHOB, C15orf48, EGR1, ATP2B1-AS1, HBEGF, ZEB2, PLCXD2, DUSP1, TTLL7, ARRDC3, BCL6, PKIB, CPEB2, GPR135, FOS, CCL4, PTPRO, PLAU, EGR3, MFAP3, KIAA1841, KLF6, ZCCHC14, ZBTB18, JUNB, SOS1, UBE2W, TFEC, MIDN, MSS51, LIMK1, TMEM71, ZFP36, BTG2, SMIM14, CMTM1, MAFF, OTUD1, ZMYND1…	0.00533809	0.518848	-0.466858	210	-1.51829
STK33_UP	c6_all_v7	CARneg	C5	1.51474	0.00089177	CD36, FGL2, SETBP1, DUSP8, SMIM14, TMEM71, LRRC25, CCL4, CREB5, TLR6, CD9, C5AR1, FOS, LPAR6, GPR65, ZFP36, ZEB2, ATP2B1-AS1, FCHO2, CCDC71L, RASGRP3, BCL6, RHOC, TNFSF15, ADM, C15orf48, EMP1, CMTM1, GPR137C, AQP9, SULF2, LFNG, HMOX1, MAP4K3, KIAA1841, PHLDA1, BCL2A1, PTPRO, HBEGF, SOCS6, DUSP1, RHOB, GLIPR1, MIR22HG, RNF149, OSTM1, PLCXD2, ANXA1, BTG2, CFL2, BMF, LY96, TTC30B, PPP1R15A, OTUD1, Z…	0.00995634	0.477271	-0.397857	210	-1.51474
STK33_SKM_UP	c6_all_v7	CARneg	C3	1.83672	6.84487e-07	TNFAIP2, CD36, CDKN1A, CREB5, FGL2, ADM, C5AR1, FGD4, ERRFI1, KIAA0895, FCHO2, LPAR6, RCBTB2, TNF, CDKN1C, RHOB, TFEC, SETBP1, FAM20C, BMF, ARHGAP42, TTLL7, CD101, GPR137C, LFNG, FAM131A, DUSP1, SULF2, PALLD, CCL4, PLK2, EVI5, GPR135, DUSP8, ZNF763, TLR1, SYCP2, MIR22HG, RGCC, NCF2, GPR132, ZBTB6, FOS, HBEGF, ZFP36, DNAJB4, GPR65, C20orf197, SIPA1L2, ACTA2, SOWAHC, SERAC1, SNX16, JUNB, MIDN, EGR1…	3.2342e-05	0.659444	-0.441896	206	-1.83672
STK33_SKM_UP	c6_all_v7	CARneg	C4	1.70121	2.07341e-05	TNFAIP2, CD36, CREB5, PLK2, C5AR1, HBEGF, FGL2, PALLD, FAM20C, RCBTB2, SGK1, LPAR6, CDKN1C, ADORA3, DUSP1, TFEC, VSIG4, FGD4, ADM, EPB41L5, FOS, LFNG, TTC30B, MIR22HG, FCHO2, DUSP8, ARHGAP42, EVI5, RASGRP3, CD101, TNF, CCL4, SNX16, MNS1, SMIM14, SETBP1, ZFP36, SYCP2, ZBTB6, RGS2, PRTFDC1, GPR65, SERAC1, SIPA1L2, MFAP3, GCNA, ARRDC3, CDKN1A, PLCXD2, MIDN, MYEF2, BTG2, TMOD2, ARL5B, SLC38A6	0.00078375	0.57561	-0.466576	208	-1.70121
STK33_SKM_UP	c6_all_v7	CARneg	C5	1.54412	0.00084812	CD36, TNFAIP2, CDKN1C, FGL2, SETBP1, RCBTB2, PLK2, ERRFI1, DUSP8, SMIM14, TMEM71, CCL4, CREB5, EPB41L5, TLR6, CD9, C5AR1, FOS, LPAR6, GPR65, ZFP36, RGCC, FCHO2, RASGRP3, RHOC, ADM, CMTM1, GPR137C, SULF2, LFNG, HMOX1, KIAA1841, SYCP2, PHLDA1, BCL2A1, PTPRO, HBEGF, FAM131A, DUSP1, RHOB, GLIPR1, MIR22HG, CD58, PLCXD2, ANXA1, BTG2, NMNAT1, PALLD, CFL2, MYEF2, BMF, MFSD9, LY96, TTC30B, ZBTB6, UPP1, MX…	0.00995634	0.477271	-0.405504	205	-1.54412
STK33_SKM_UP	c6_all_v7	CARneg	C2	1.45504	0.0014851	FGL2, CD36, CDKN1A, SETBP1, RCBTB2, TNFAIP2, CREB5, TNF, ADM, SLC7A11, SULF2, CD101, C5AR1, CDKN1C, MPPED2, LPAR6, LFNG, FCHO2, RASGRP3, MYEF2, RHOB, EGR1, HBEGF, PLCXD2, DUSP1, TTLL7, SYCP2, ARRDC3, EPB41L5, SOWAHC, PKIB, CPEB2, GPR135, LRRC37A2, FOS, CCL4, PTPRO, PLAU, MFAP3, KIAA1841, KLF6, ZCCHC14, ACTA2, DNAJB4, FAM131A, GCNA, GPR132, JUNB, UBE2W, TFEC, MIDN, MSS51, TMEM71, ZFP36, BTG2, CALH…	0.0175428	0.45506	-0.446392	207	-1.45504
STK33_SKM_DN	c6_all_v7	CARneg	C5	1.57242	0.000917888	RAB27B, FAM241A, SLCO4C1, TMEM273, ZFP57, PWP2, ELOVL6, CXCL16, ARHGEF26, TANC2, PLS1, ACP6, LAMB3, BTLA, BCL2, CHPT1, PRDM11, BEX2, LRRC34, PLCH1, RAB38, CCDC26, CALD1, ANPEP, RGS16, SYDE2, SBDS, SH3D19, MTURN, TEAD4, KAZN, ALOX5, GPM6B, PIP4P2, PRKAR2B, ASNS, UAP1L1, VCL, EPHX2, CRIM1, BPNT1	0.00995634	0.477271	-0.428011	145	-1.57242
STK33_SKM_DN	c6_all_v7	CARneg	C2	1.36322	0.0179356	ZFP57, SLCO4C1, ALOX5, PRKAR2B, TANC2, IL12RB2, TMEM273, GRB10, ARHGEF26, PWP2, RAB27B, PYROXD2, BEX2, BTLA, FBLIM1, SPNS2, NUDT11, ZBED3, NFE2, BCL2, ELOVL6, CPED1, C3orf80, LPAR3, KAZN, DZIP1, BFSP2-AS1, CHPT1, FAM241A, TXNRD3, TEAD4, PPM1H, FOXP2, CCDC26, DHRS11, CRIP2, VCL, CRIM1, TONSL, CRYBG1	0.091617	0.352488	-0.422876	165	-1.36322
STK33_NOMO_UP	c6_all_v7	CARneg	C4	1.70222	7.8826e-06	LRRC25, C5AR1, AQP9, SIGLEC9, ADGRE2, JAKMIP2, EGR2, PSD3, SGK1, RIN2, EFNB2, DUSP1, ULK2, TFEC, ZBTB18, GPNMB, ABCA1, FOS, KYNU, PINLYP, PTGFRN, TTC30B, MIR22HG, NRP1, FCHO2, FAM234B, RASGRP3, CAPRIN2, IRS1, KDELR3, ARL4C, ZEB2, IL7R, CCL4, CD80, LAMB3, IL10, SETBP1, SOS1, MAP3K8, ZFP36, RGS2, SYNJ1, BCL6, NR1D2, SIPA1L2, ARRDC3, SAMD9L, MIDN, BTG2, YES1, ACSM3, ARL5B, GNPDA2, NEAT1, STX6, GPR13…	0.000372453	0.593325	-0.465287	214	-1.70222
STK33_NOMO_UP	c6_all_v7	CARneg	C5	1.51031	0.00109683	ADGRE2, TUBB2A, A2M, SETBP1, KCTD3, LRRC25, CCL4, IRS1, JAKMIP2, TLR6, C5AR1, LAMB3, FOS, ZFP36, FAM13A, ZEB2, FCHO2, CCDC71L, RASGRP3, TM6SF1, BCL6, TNFSF15, C15orf48, FAM114A1, EMP1, AQP9, IL7R, HMOX1, MAP4K3, PHLDA1, PTPRO, FBXL13, CD80, DUSP1, RHOB, ULK2, GLIPR1, MIR22HG, RNF149, OSTM1, BTG2, ARL4C, CFL2, MAP3K8, LY96, TTC30B, PPP1R15A, NR1D2, OTUD1, NEAT1, UPP1, JUN, PANX1, KLF6, DOLK, SAR1B…	0.0103651	0.45506	-0.39707	202	-1.51031
STK33_NOMO_UP	c6_all_v7	CARneg	C3	1.459	0.00202521	LRRC25, AQP9, C5AR1, A2M, FCHO2, RIN2, ABCA1, RHOB, TFEC, SETBP1, KYNU, PINLYP, SIGLEC9, FBXL13, JAKMIP2, BCL6, FAM13A, ADGRE2, DUSP1, ZEB2, IRS1, CCL4, FAM114A1, TLR1, SDC4, MIR22HG, MAP3K8, FOS, EPAS1, ZFP36, IER3, IL7R, NCEH1, ULK2, SIPA1L2, JUNB, MIDN, OSTM1, SYNJ1, DUSP5, ARRDC3, NR1D2, RGS2, CAPRIN2, LIMK1, CAB39L, C3AR1, SLC11A2, CREBL2, OTUD1, GPR137B, NECAP1, TUBB2A, SOS1, ARL4C, RNF149,…	0.0199847	0.431708	-0.349823	209	-1.459
STK33_NOMO_DN	c6_all_v7	CARneg	C5	1.35041	0.0224372	PLXND1, FAM241A, SOCS2, ANXA3, JDP2, CR1, IL18RAP, ARG1, SOBP, PTGER2, FCGR3B, SLC37A4, PLS1, IL18R1, TRIM58, BTLA, OSBPL1A, POLR2J2, HES6, BCL2, CHPT1, BEX2, HCG11, PIK3R3, PSTPIP2, PLCH1, TSPAN2, PRG4, ANPEP, CD24, SYDE2, NEO1, MTURN, STX11, LPCAT2, KAZN, EGLN3, ALOX5, CAMK1D, PIP4P2, ASNS	0.0865434	0.352488	-0.36007	180	-1.35041
STK33_NOMO_DN	c6_all_v7	CARneg	C4	1.34478	0.0126023	ALOX5, BTLA, EGLN3, IL18R1, IL18RAP, ANPEP, LPCAT2, SLC47A1, EXPH5, CR1, TRIM58, NEO1, MAP3K21, FCGR3B, RORB, NUDT11, KAZN, ARG1, ST6GALNAC3, C1orf115, BACE2, BEX2, SOCS2, LRRK2, CRYBG1, TSPAN2, PSTPIP2, RNF144A, SOBP, PRAM1, MTURN, PIK3R3, NEDD4, CCR7, XAF1	0.0721766	0.38073	-0.372785	185	-1.34478
STK33_DN	c6_all_v7	CARneg	C4	1.39355	0.00786865	ALOX5, LGALSL, SLCO4C1, CLTCL1, BTLA, ANPEP, LPCAT2, PPM1H, TRIM58, NEO1, MAP3K21, RORB, NUDT11, KAZN, KBTBD11, ST6GALNAC3, C1orf115, PRKAR2B, ZBED3, BACE2, BEX2, LRRK2, CRYBG1, TSPAN2, PSTPIP2, VCL, TANC2, RNF144A, P3H4	0.0531134	0.38073	-0.384675	190	-1.39355
STAT5A_03	c3_tft_v7	CARneg	C5	1.55315	0.00157483	S100A9, SVIL, MYO3B, LRP1, TCF4, DENND2C, ZNF385A, PLXDC2, ACTN1, ZKSCAN3, PELI2, CREB5, PRKCE, NEUROD2, KCNJ13, GPR150, PIM1, KCNA3, DHRS3, PLEKHA1, BCL6, ERG28, HMGN5, MEX3B, HSPG2, CELF4, NEO1, MTMR11, CXADR, BCL11A, BTG1, SF3B4, VRK1, PCYOX1, HOXC4, NEDD4L, KIZ, KDM6A, TMEM216, TOB1, CUX1, FBXW7, TUBA1A, SV2A, ZFAND3, STAT3, PDE3B, ZBTB18, LRRN3, TCTN3, BBX, FBXO9, RNF115	0.0600518	0.45506	-0.414029	158	-1.55315
STAT3	Curated	CARneg	C6	1.91434	8.89666e-07	MAL, PDE4B, RGCC, FOXP1, IL7R, ZFP36L2, CREM, LTB, BEX2, JUNB, SOCS3, WDR74, JUND, CD69, RGS1, BEX4, DUSP1, SLC2A3, TPT1, BTG1, LMNA, EML4, TNFAIP3, FTH1, JUN, RPL9, GADD45B, RPL30, ZNF331, EEF1A1, FOS, SPOCK2, RPL13, CD44, SNHG9, PIK3IP1, NR4A2, GPR183, PIK3R1, RCAN3, TTC39C, SNHG8, RPS12, EIF1, NFKB1, RPS13, RPL18, PABPC4, RPS16, RPS23, CHD1, RPS6, LEPROTL1, JMJD1C, RPS14, FOSB, RPL5, MPZL3, RP…	1.6014e-05	0.659444	-0.45559	151	-1.91434
SRY_02	c3_tft_v7	CARneg	C5	1.7286	4.74734e-05	CD36, PPP2R2B, NFIA, LRP1, TCF4, GNAO1, KLF3, SOX5, ZNF436, PELI2, MXI1, PSMA8, NR3C2, TBX6, NR4A1, PAK3, NANOS1, CLIP2, TSC22D3, DHRS3, ZEB2, IL5RA, CCDC92, DUSP6, KANSL1L, NDNF, MAP1B, MYLK, TECTA, SLC12A8, NREP, HS3ST1, KAT14, PLEKHA5, PIK3R1, NFE2L1, FAM53B, KLF7, CFL2, ZBTB37, MPP6, HOXC4, ACVR2A, MDGA1, QKI, SRSF7, USP32, RCN1	0.00691611	0.557332	-0.461572	154	-1.7286
SRY_02	c3_tft_v7	CARneg	C4	1.6882	7.96814e-05	CD36, LRP1, PPP2R2B, IL5RA, KLF3, TCF4, NFIX, RAPGEF5, CLIP2, NFIA, SIX4, HLX, NR4A1, PELI2, NUDT11, EBF1, MAP1B, FGFR2, DHRS3, HOXC4, KANSL1L, SOX5, PTGFRN, NRP1, PLEKHA5, MYLK, MDGA1, MRC2, MAGI3, ZEB2, CCDC92, MXI1, TSC22D3, PIK3R1, GNAO1	0.0150199	0.538434	-0.477972	166	-1.6882
SRY_02	c3_tft_v7	CARneg	C3	1.64581	0.000138521	CD36, HLX, LRP1, MRC2, PPP2R2B, TCF4, PELI2, NUDT11, KLF3, IL5RA, SOGA1, NFIA, PLEKHA5, GNAO1, ZNF436, MAML3, HESX1, SOX5, DLL1, CSRNP3, ALDH1A2, MXI1, ZEB2, B3GALT2, TSC22D3, GNAQ, CLIP2, CCNJ, NR4A3, ACVR2A, DHRS3, ZNF362, MPP6, KANSL1L, ZBTB22, RELT, TBX6, CCDC92, KLF7, WASL, HOXC4, DUSP5, PIK3R1, FAM53B, QKI, NR4A1, PPM1D, MDGA1	0.0313334	0.518848	-0.410977	163	-1.64581
SRY_02	c3_tft_v7	CARneg	C1	1.63671	0.000109994	CD36, TCF4, MAGI3, NR4A1, NUDT11, SOX5, ZNF436, CLIP2, DLG2, IL5RA, HOXC4, MRC2, B3GALT2, POU4F1, DHRS3, FOXB1, KLF3, HLX, LRP1, FGFR2, PPP2R2B, NFIX, MPP6, MXI1, TGFB3, KLF7, PELI2, FGF9, FOXP2, KANSL1L, DLL1, PTGFRN, PAK3, NFIB, ACVR2A, PLEKHA5, SOGA1, FAM53B, PSMA8, MDGA1, ZEB2, RNF43, TSC22D3, ZBTB37, ZNF711, SIX4, MAML3, DCHS1, HS3ST1, PREX2, FN1, SOX6, NRP1, MGAT4C	0.0497319	0.538434	-0.478369	168	-1.63671
SRY_02	c3_tft_v7	CARneg	C2	1.57809	0.000111288	HOXC4, CD36, IL5RA, MRC2, PPP2R2B, PELI2, CHN1, TCF4, KLF3, NFIX, SEMA6C, NRP1, HLX, FGFR2, FGF9, MAML3, NFIA, MAP1B, LRP1, KLF7, PLEKHA5, HESX1, NUDT11, MXI1, SOX6, MID2, FN1, ZEB2, SOX5, OLFML3, TSC22D3, RNF43, NR3C2, DCHS1, FAM53B, TBX6, GNAO1, MPP6, ZNF711, SIX4, FOXP2, EBF1, ZNF646, GRAP, TGFB3	0.0208293	0.538434	-0.491513	171	-1.57809
SRY_01	c3_tft_v7	CARneg	C4	1.60784	0.0004735	TCF7L2, PLXDC2, C1orf21, DDIT4, NFIA, AKR1E2, EGR2, HLX, SLC25A34, CKAP4, SPON1, ASCL2, CDKN1C, NCAM1, RASSF8, DHRS3, HOXC4, THBS3, ZBTB18, YPEL4, SOX5, SH3D21, INSRR, CTNNA3, CCDC89, SORT1, GABARAPL1, NECTIN1, SORBS1, PLEKHA5, MAGI3, MXI1, ATXN7L2	0.0334705	0.498493	-0.456598	159	-1.60784
SOX9_B1	c3_tft_v7	CARneg	C3	1.56991	0.000672291	CD36, BASP1, HHEX, DENND2C, GJC2, NCAM1, ADRB2, C1orf21, PPP2R2B, PELI2, KLF3, VLDLR, HDAC9, NEUROD2, DLC1, GNAO1, ABCF2, SOX5, ZNF502, WEE1, MEX3D, TSC22D3, PTPN12, TLE1, FBXL19-AS1, CCNJ, ACVR2A, TSPAN2, STK38L, MARCKSL1, SSBP3, RELT, TBX6, CCDC92, FSIP2, MAST1	0.0691237	0.477271	-0.391024	164	-1.56991
SOX9_B1	c3_tft_v7	CARneg	C2	1.48122	0.00145624	NCAM1, CD36, DENND2C, BASP1, PPP2R2B, PELI2, C1orf21, KLF3, ADRB2, NFIX, SEMA6C, FGFR2, HDAC9, PCDH12, EDA, VLDLR, FN1, ZNF502, SOX5, DPYSL2, FBXL19-AS1, PTPN12, TSC22D3, HHEX, TBX6, GNAO1, ZNF711, PDE9A, FANK1, EBF1, DMD, DLC1, PFN2, ZNF646, PPP1R16B, RGS3, MEX3D, SSBP3, PNRC1, WEE1, MAP3K3, MLLT6, FEN1, SCD, CCDC92, MBP, CYB5D1, ACVR2A, TSPAN2, KIF20B	0.0906641	0.45506	-0.461955	165	-1.48122
SOX5_01	c3_tft_v7	CARneg	C5	1.76808	1.76497e-05	LYZ, NCAM1, PPP2R2B, ADRB2, NFIA, PTCH1, TCF4, RBM47, DENND2C, MAF, SOX5, PLCB1, MORC4, PELI2, MXI1, NR4A1, NANOS1, CLIP2, EPHB6, PIM1, FOSL2, TSC22D3, DHRS3, MIR503HG, DUSP6, EVA1C, HHEX, NOVA1, NDNF, YPEL4, MYLK, SEMA3A, PITX1, HS3ST1, FSTL1, BCL11A, RHOB, NFIL3, FAM53B, TFDP2, B3GLCT, HOXC4, ACVR2A, MLLT6, USP32, EML4, RCN1, GLRX5, ARMCX6, AUTS2, ZADH2	0.00691611	0.57561	-0.46594	177	-1.76808
SOX5_01	c3_tft_v7	CARneg	C3	1.73384	2.98297e-05	LYZ, RBM47, HHEX, DENND2C, MRC2, NCAM1, ADRB2, PPP2R2B, TCF4, PELI2, B3GLCT, MAF, SOGA1, BCL11A, NFIA, RHOB, ID1, MORC4, MAML3, HESX1, PITX1, SOX5, ALDH1A2, PTCH1, MXI1, TSC22D3, FICD, PLCB1, FOSL2, VAV3, CLIP2, CCNJ, NFIL3, ACVR2A, DHRS3, ZNF362, ZBTB22, RELT, TOB1, WASL, PIM1, HOXC4, AMFR, DUSP5, FAM53B, KIF20B, NR4A1, PPM1D, MLLT6, NECAP1, TFDP2, CBFA2T2, MOSPD2, VPS37A, EML4	0.0130044	0.57561	-0.425323	179	-1.73384
SOX5_01	c3_tft_v7	CARneg	C1	1.72283	5.72802e-06	LYZ, TCF4, DENND2C, NR4A1, SOX5, CLIP2, RBM47, DLG2, SATB2, HOXC4, MAF, MRC2, NCAM1, ADRB2, POU4F1, MORC4, DHRS3, PITX1, FOXB1, FGFR2, ID1, RHOB, PPP2R2B, NOVA1, HHEX, MXI1, PELI2, FGF9, PTCH1, FOXP2, ZNF365, ANK2, YPEL4, NFIB, COL4A5, ACVR2A, MLLT6, SOGA1, FAM53B, FOSL2, ZBTB18, B3GLCT, NFIL3, TSC22D3, PLCB1, MAML3, HS3ST1, PREX2, SOX6, NRP1, MGAT4C, MIR503HG, FICD, CHM, ZFYVE1, PIM1, FANCB, KIF…	0.00632374	0.610527	-0.497749	182	-1.72283
SOX5_01	c3_tft_v7	CARneg	C4	1.65442	0.000108611	LYZ, RBM47, PPP2R2B, TCF4, CLIP2, ADRB2, NFIA, SEMA6A, PITX1, NR4A1, MORC4, PELI2, MAF, EBF1, NCAM1, FGFR2, DHRS3, HOXC4, FOSL2, ZBTB18, YPEL4, SOX5, PLCB1, ID1, NRP1, HHEX, RFX3, MYLK, PTCH1, MRC2, NFIL3, MXI1, TSC22D3	0.0175485	0.538434	-0.464617	178	-1.65442
SOX5_01	c3_tft_v7	CARneg	C2	1.60868	4.92674e-05	LYZ, HOXC4, NCAM1, DENND2C, MRC2, PTCH1, PPP2R2B, PELI2, TCF4, ADRB2, SEMA6C, NRP1, FGFR2, FGF9, MAML3, NFIA, PITX1, PLCB1, MPPED2, NOVA1, HESX1, MAF, BCL11A, RHOB, MXI1, SOX6, SOX5, RBM47, FANCB, B3GLCT, MORC4, TSC22D3, HHEX, FAM53B, COL4A5, KANK1, FOXP2, EBF1, PIM1, ID1, ZNF646	0.0208293	0.557332	-0.499088	184	-1.60868
SNF5_DN.V1_DN	c6_all_v7	CARneg	C5	1.43415	0.0221627	CSGALNACT1, NSG1, SNCA, SLC30A4, RRAD, OTUD7A, MAPK13, ESR1, PKP2, LY75, TMEM176A, SLC9A3R2, RGS16, CELF4, MYLK, TRAV38-2DV8, RIMKLB, ANKRD1, FOXD1, HOXB9	0.0865434	0.352488	-0.426001	73	-1.43415
SMAD3_Q6	c3_tft_v7	CARneg	C5	1.57673	0.00244117	TSHZ3, C1orf21, EPHX4, GADD45G, KCTD15, FRY, SCRG1, CACNB2, AGPAT4, GABRE, SPECC1, ACKR3, PAK3, PELI3, ZEB2, NOS3, PIK3R3, SSBP3, NRXN3, COL11A2, RASL11B, PAX2, NLGN2, HES7, BTBD3, ABHD15, PLCXD2, KLF7, YBX3, DOCK9, TFDP2, HOXC4, FAM117A, BCL9L	0.0839153	0.431708	-0.428802	130	-1.57673
SGCGSSAAA_E2F1DP2_01	c3_tft_v7	CART	C5	1.61002	0.000195501	ID3, TMEM187, SUV39H1, SLC9A5, MCM2, CDC6, PCLAF, RET, E2F8, MYC, IER5L, RAVER1, CDC20B, FMO4, NR6A1, PAN2, CLSPN, MCM7, MCM4, MCM3, ZNF565, PCNA, FHOD1, E2F1, UBR7, AK2, RRM2, WBP2NL, ZNF367, HMGA1, ATAD5, ZCWPW1, POLE2, KIAA0825, KBTBD7, SMC1A, NABP2, TAOK2, SNRPD1, POLD1, SMC6, TRMT2A, SYNCRIP, DNMT1, NUP62, MYH10, ATAD2, GEN1, EMSY, PLAGL1	0.0195501	0.518848	0.371922	144	1.61002
RTAAACA_FREAC2_01	c3_tft_v7	CARneg	C4	1.50505	2.41548e-05	VCAN, TCF7L2, CREB5, KCTD12, LRP1, PPP2R2B, FRY, LGALSL, ADRB1, HOXA1, FGL2, MGLL, KLF3, TCF4, NMUR1, NFIX, CLIP2, DDIT4, SMAD5, KIF19, BTBD8, SLC16A6, GALNT3, MBOAT2, NR4A1, NEO1, INSR, MSC, RORB, PELI2, MAF, CDKN1C, SOCS1, ETV5, SLC24A2, SESN3, NID2, DUSP1, DHRS3, HOXC4, ZBTB16, ZNF219, FOSL2, ZBTB18, SOX5, SMAD1, MAPK10, HOXB9, EDN1, DST, DMD, DLC1, CCDC89, AXIN2, ABCA1, DOCK5, FOS, LRRC1, NLG…	0.00910634	0.57561	-0.372908	619	-1.50505
RTAAACA_FREAC2_01	c3_tft_v7	CARneg	C5	1.35834	0.000838138	VCAN, PPP2R2B, SMAD5, SLC4A1, CDKN1C, LRP1, TCF7L2, SHROOM1, GALNT3, PTCH1, TCF4, FGL2, ZBTB16, DST, GNAO1, KCTD15, SOBP, FRY, MAF, NMUR1, KLF3, ELOVL6, SOX5, KIF19, CCDC9B, TSPAN4, PPT2, CACNB2, PELI2, CREB5, CDK14, C17orf58, JUP, NR4A1, KCNJ13, CLIP2, GRHL1, ID2, TXNIP, FOS, ING1, RORC, RARG, FOSL2, SOCS1, TSC22D3, DHRS3, PANK1, UBXN10, DDIT4, SSBP3, HIBADH, PPP3CA, DOCK5, P2RX7, MGLL, LPP, TME…	0.0419069	0.477271	-0.333826	594	-1.35834
RSRFC4_Q2	c3_tft_v7	CARneg	C5	1.68336	0.000458896	TPM2, PTCH1, LYN, GPR153, SOX5, TTYH2, TMEM71, SCML1, IRS1, NR4A1, LIF, HDAC9, ARHGEF37, RASGRP3, MGST3, PIK3R3, ESR1, HIBADH, STRADB, NRXN3, CELF4, PRDM1, EEF1A2, ARHGAP26, SLC2A4, PTPRO, ESAM, SSH3, ATF3, MOSMO, PAK6, ZNF143, B3GLCT, HOXC4, FAM117A, BCL9L, RGS3, SDHC, ARMCX6, CUX1, DNAJA4, SV2A, TNNC2, LUC7L, MBNL2, RAB2A, MID1IP1	0.0315491	0.498493	-0.465594	114	-1.68336
RSRFC4_Q2	c3_tft_v7	CARneg	C2	1.56965	0.000810406	HOXC4, GPR153, EEF1A2, PTCH1, ATF3, KCNQ5, USP2, LYN, IRS1, HDAC9, TTYH2, SCML1, RASGRP3, LZTS2, SOX5, ESAM, B3GLCT, ATP1B2, PMEPA1, INPP4A, FITM1, PTPRO, DMD, ADAM11, ARHGAP26, SLAMF1, S1PR1, RGS3, TGFB3, NEDD4, SSH3, DNAJA4, MGST3, BCL9L, STRADB, TMEM71, LUC7L, ZNF143, PRDM1, PIK3R3	0.0650061	0.477271	-0.503038	117	-1.56965
RSRFC4_01	c3_tft_v7	CARneg	C2	1.63923	7.38783e-05	HOXC4, GPR153, EEF1A2, PTCH1, ITSN1, PANK1, ATF3, KCNQ5, USP2, IRS1, HDAC9, TTYH2, PCDH11X, SCML1, RASGRP3, LZTS2, SOX5, ESAM, B3GLCT, ATP1B2, NDRG2, PMEPA1, INPP4A, FITM1, SLC9A5, PTPRO, DMD, ADAM11, ARHGAP26, SLAMF1, S1PR1, RGS3, NEDD4, SSH3, ZBTB18, SLC44A1, DNAJA4, RBMS3, PPP1R3D, MGST3, LRRC39, TOB2, STRADB, TMEM71, LUC7L, ZNF143, PRDM1	0.0208293	0.538434	-0.518004	137	-1.63923
RPS14_DN.V1_UP	c6_all_v7	CARneg	C3	2.26042	3.08497e-10	CD14, TNFAIP2, HCK, CDKN1A, CSTA, RBM47, SIRPA, IGFBP7, KCTD12, PTGDS, DMXL2, IGSF6, CR1, RCBTB2, PILRA, MAF, BST1, FLVCR2, ANPEP, RIN2, KBTBD11, ITGAM, FRY, CTSH, RHOB, TFEC, KYNU, ITGAX, PDGFA, HESX1, RGL1, CYP1B1, ANXA3, BCL6, SLC31A2, PLK2, MX2, SDC4, NR4A3, SESN1, CPM, LY86, NCF2, CD300A	5.83059e-08	0.814036	-0.581493	123	-2.26042
RPS14_DN.V1_UP	c6_all_v7	CARneg	C4	2.01123	1.04643e-07	CD14, TNFAIP2, KCTD12, RBM47, HCK, FRY, PLK2, SIRPA, CSTA, ANPEP, IGFBP7, RCBTB2, IGSF6, DMXL2, CR1, PILRA, GNAZ, CTSH, ITGAM, MAF, PDGFA, RIN2, KBTBD11, CYP1B1, NYNRIN, TFEC, SESN1, GPNMB, CTSG, ITGAX, BST1, KYNU, SLC31A2, PTGDS, RASGRP3, RGL1, ARL4C, RAB31, HLA-DQB1, CACNB4, FLVCR2	1.97775e-05	0.704976	-0.585844	128	-2.01123
RPS14_DN.V1_UP	c6_all_v7	CARneg	C5	2.0002	3.63137e-08	PTGDS, CD14, TNFAIP2, RBM47, ANXA3, CR1, IGFBP7, RCBTB2, IGSF6, CSTA, DMXL2, LY86, FLVCR2, FRY, MAF, PLK2, CD300A, CTSH, CD9, RAB31, MDFIC, ITGAM, ITGAX, RASGRP3, TM6SF1, BCL6, LY75, SIRPA, KBTBD11, HCK, ANPEP, CTSG, EMP1, BCL2A1, SH3BP5, PTPRO, ANKRD1, ARHGEF3, SH2D2A, HLA-DQB1, RHOB, EVI2A, NKG7, ARL4C, CRIM1, CASP1, BST1, LY96	6.86329e-06	0.719513	-0.555916	122	-2.0002
RPS14_DN.V1_UP	c6_all_v7	CARneg	C2	1.67088	3.7276e-05	CDKN1A, RCBTB2, TNFAIP2, CR1, CSTA, DMXL2, ITGAM, HCK, KCTD12, CD14, FRY, SIRPA, ITGAX, CACNB4, RASGRP3, PTGDS, HESX1, LINC00461, MAF, IGFBP7, RHOB, SESN1, SLC31A2, GNAZ, RBM47, BCL6, GPNMB, PDGFA, KBTBD11, MDFIC, HLA-DQB1, IGSF6, PTPRO, PLAU, EGR3, CYP1B1, CD300A, CRIM1, ARL4C, SH3BP5, ACTA2, STX3, ARHGEF3, LY75, CTSH, TFEC, SFXN3, MX2, NKG7	0.00234839	0.557332	-0.530412	125	-1.67088
RPS14_DN.V1_DN	c6_all_v7	CART	C3	1.66686	0.000276025	MYBL2, GINS2, PYCR1, CCNB2, ADGRA3, CDC20, CDCA3, BCAT1, MCM10, NEFH, RGS5, ESPL1, TK1, MKI67, DLGAP5, KIF5A, TWNK, MCM5, KIF20A, SRR, TLX2, NLE1, KIF15, ELMO3, AGAP1, HMGN5, EXO1, SIRT4, PSAT1, TRIP13, ERCC2, CYBRD1, FZD5, MRPL12, CDC6, SLC43A1, PC, TLN2, PES1, ZWILCH, SLC29A1, ORC1, BAG2, NDC1, MRTO4, SUV39H2, E2F8, LRRC20, EPB41	0.00434739	0.498493	0.435972	136	1.66686
RPS14_DN.V1_DN	c6_all_v7	CART	C5	1.50693	0.00163297	ADGRA3, TLN2, AOC2, MCM5, MYBL2, ADD2, GINS2, BCAT1, CDC6, SLC29A1, E2F8, TK1, MKI67, ENG, PES1, DYRK3, GSTA4, SLC43A1, MRPL12, CDR2, TWNK, DLGAP5, GEMIN4, TPRA1, ERCC2, PYCR1, CDC20, AGAP1, LRRC20, BAG2, SUV39H2, NEFH, CYBRD1, ERCC6L, PC, SLC31A1, NLE1, MRTO4, TUBGCP4, ZC2HC1C, TBRG4, TUBG1, POLD1, SLC29A2, MTPAP	0.0137089	0.45506	0.348147	134	1.50693
RORA_TARGET_GENES	c3_tft_v7	CART	C3	1.55058	0.000397432	ADPRHL1, PCLAF, RGS5, PIWIL2, TTC26, SLC27A5, ENPP3, TTC23, HMGN2, TACO1, ATP6V1G2, NDUFAF1, NFKBIL1, LSM5, TMEM69, PEMT, MRPL30, UQCC1, SMIM20, NDUFB3, WDR83, CASC2, SUGCT, ZMYND12, VPS25, TUT1, GTPBP3, NOSIP, VIPAS39, TMEM101, MRPL13, TARS2, RRM1, TXN2, MRPL1, MCAT, PDCD4-AS1, NUDT5, NME1, ISY1, VPS51, NOP16, YIPF2, CCDC97, ALDH18A1, COPS4, AHCYL1, ZNF791, FKBP3, ELP3, RBM27, POMP, VPS52, ALG3,…	0.0660631	0.498493	0.389025	218	1.55058
RFX1_02	c3_tft_v7	CART	C5	1.42165	0.00130701	EDC4, CRIP2, ZNF768, C2orf15, HPCAL4, KCNIP2, MAPRE3, TNKS1BP1, CNIH2, GPR162, MORN2, SYT5, TCTN2, SEMA4B, TUBE1, SPATA2, ANK2, CDKL2, NIM1K, NRSN2, PKIG, TEX9, ZSWIM1, INO80B, CADM1, CFAP70, KATNAL2, LARGE2, E2F1, ZFYVE1, ITGB3BP, TMEM17, GNB4, ADK, MPPED2, RPL17, REEP6, STOML2, GRWD1, MRPL49, PICK1, THNSL1, PER2, PSD, TM9SF1, TGFB3, HMGN2, PHTF1, HSD11B1L, PAK4, SLC44A1, B9D2, MAPK11, RNF5, BMT…	0.0575086	0.45506	0.321987	188	1.42165
RELA_DN.V1_DN	c6_all_v7	CARneg	C5	1.5379	0.0100011	MYOM2, C1orf21, C5AR2, MYOM1, EGFL6, SLC12A5, XPNPEP2, HDAC9, NEURL1, CALY, TMEM176A, NRXN3, FMO5, IL7R, TNFRSF8, SPINK2, SEMA3A, RAMP1, OXT, LGALS4, L1CAM, ADGRE1	0.0525057	0.38073	-0.475456	57	-1.5379
RELA_DN.V1_DN	c6_all_v7	CARneg	C4	1.52783	0.00933628	C1orf21, CDON, XPNPEP2, MYOM2, C5AR2, HDAC9, TNFRSF8, CUBN, SLC22A18AS, TFEC, TMEM176A, MST1R, CALY, IDUA, NECTIN1, IL7R, FMO5	0.0608468	0.38073	-0.502551	58	-1.52783
REACTOME_UNWINDING_OF_DNA	c2_cp_reactome	CART	C5	2.19573	6.93292e-06	MCM5, GINS2, MCM2, CDC45, GINS4, MCM7, MCM4, MCM3, MCM8, GINS1	0.00156882	0.610527	0.855789	12	2.19573
REACTOME_UNWINDING_OF_DNA	c2_cp_reactome	CART	C3	1.84099	0.00117428	GINS2, CDC45, MCM2, MCM5, MCM4, MCM7, MCM3, MCM6	0.0312328	0.45506	0.769775	12	1.84099
REACTOME_TRIGLYCERIDE_BIOSYNTHESIS	c2_cp_reactome	CART	C3	1.68268	0.00713032	GPAT2, DGAT2	0.099123	0.407018	0.828486	7	1.68268
REACTOME_TRIF_MEDIATED_PROGRAMMED_CELL_DEATH	c2_cp_reactome	CARneg	C3	1.80279	0.00238577	CD14, TLR4	0.0512296	0.431708	-0.839306	8	-1.80279
REACTOME_TRANSLATION	c2_cp_reactome	CART	C3	1.95999	4.19036e-10	RPS4Y2, EARS2, FARSA, RPL26L1, NARS2, SARS2, WARS2, MRPL12, MTIF2, MRPL37, MRPL45, RPLP0, MRRF, MRPL19, RPS21, DARS2, MRPL30, MRPL23, MRPL35, MRPL15, MRPL32, MRPL39, ERAL1, CHCHD1, MRPS14, RPSA, RPS4Y1, MRPS28, MRPL52, MRPL13, MRPL40, MRPS27, MRPL58, RPS26, TARS2, EIF2B2, MRPL1, MRPL18, SRPRB, AIMP2, FARSB, MRPL14, MRPS16, RPL4, RPL12, RPL22L1, EEF1E1, APEH, OXA1L, RPN2, MRPS25, MRPS18B, MRPS11, …	2.21949e-07	0.814036	0.47598	271	1.95999
REACTOME_TRANSLATION	c2_cp_reactome	CART	C5	1.48673	0.000298656	RPS17, TARS2, MRPL23, MRPL12, MRPS18A, MRPL53, SARS2, MRPS35, MRRF, RPS21, MRPL45, MRPL52, RPL17, MRPL28, AIMP2, SEC61A1, MRPS15, SEC61G, MRPL17, MRPL30, RPL36A, MRPL49, MRPS25, VARS2, RPLP0, RPS18, EIF3D, MRPS26, RPL36, EIF3H, APEH, RPL35, MRPS33, RPL4, EIF3K, MRPL10, RPSA, RPL27, RPL23, MRPL22, RPL37, MRPS7, RPS5, EIF4H, MRPS11, RPL37A, MRPL58, RPL38, DARS2, MRPL47, RPS29, MRPL14, CHCHD1, EIF3B…	0.0152603	0.498493	0.315271	269	1.48673
REACTOME_TRANSCRIPTIONAL_REGULATION_OF_WHITE_ADIPOCYTE_DIFFERENTIATION	c2_cp_reactome	CARneg	C4	1.66713	0.00109802	CD36, ZNF467, CEBPA, EGR2, WNT10B, SMARCD3, EBF1, CEBPB, TNF	0.0623908	0.45506	-0.528177	71	-1.66713
REACTOME_TRANSCRIPTIONAL_REGULATION_OF_TESTIS_DIFFERENTIATION	c2_cp_reactome	CARneg	C5	1.43607	0.00011292	PTGDS	0.00935806	0.538434	-0.997436	2	-1.43607
REACTOME_TRAF6_MEDIATED_INDUCTION_OF_TAK1_COMPLEX_WITHIN_TLR4_COMPLEX	c2_cp_reactome	CARneg	C3	1.83782	0.00380763	CD14, TLR4	0.0702728	0.431708	-0.718876	15	-1.83782
REACTOME_TOLL_LIKE_RECEPTOR_TLR1_TLR2_CASCADE	c2_cp_reactome	CARneg	C3	1.91442	2.40836e-05	S100A9, CD14, CD36, IRAK3, TLR2, TLR4, BTK, PELI2, RIPK2, SOCS1, PELI3, RPS6KA2	0.00167322	0.57561	-0.518095	92	-1.91442
REACTOME_TOLL_LIKE_RECEPTOR_TLR1_TLR2_CASCADE	c2_cp_reactome	CARneg	C5	1.73714	0.00015844	S100A9, S100B, CD36, CD14, RIPK2, TLR4, PELI2, TLR6, FOS, PELI3, SOCS1, IRAK3, MAP2K1, TLR2, DUSP6	0.0101798	0.518848	-0.498891	89	-1.73714
REACTOME_TOLL_LIKE_RECEPTOR_TLR1_TLR2_CASCADE	c2_cp_reactome	CARneg	C4	1.70138	0.000678659	CD14, S100A9, CD36, TLR2, TLR4, IRAK3, RIPK2, PELI2, SOCS1, RPS6KA2, MAPK10, FOS, MAP3K8, PELI3, IRAK2, FBXW11, MAP2K4, MAP3K1, S100B, BTRC, MAPK7, ATF1, TLR1, JUN, IKBKB, TRAF6, TLR6, MAPK9, MAPK14, IRAK4	0.0452834	0.477271	-0.518718	92	-1.70138
REACTOME_TOLL_LIKE_RECEPTOR_CASCADES	c2_cp_reactome	CARneg	C3	1.7868	2.5272e-05	S100A9, CD14, CD36, CTSL, IRAK3, TLR2, TLR4, BTK, PELI2, RIPK2, ITGAM, SOCS1, PELI3, RPS6KA2, IRF7, TLR1, MAP3K8, DNM3, LY86, FOS	0.00167322	0.57561	-0.454113	134	-1.7868
REACTOME_TOLL_LIKE_RECEPTOR_CASCADES	c2_cp_reactome	CARneg	C5	1.62472	0.00125586	S100A9, S100B, CD36, CD14, RIPK2, CTSL, LY86, TLR4, PELI2, TLR6, FOS, PELI3, ITGAM, SOCS1, IRAK3, MAP2K1, TLR2, DUSP6	0.0390056	0.45506	-0.446065	129	-1.62472
REACTOME_TNFS_BIND_THEIR_PHYSIOLOGICAL_RECEPTORS	c2_cp_reactome	CARneg	C5	1.74697	0.0042366	FASLG, TNFRSF4, TNFSF13B, TNFRSF18, TNFSF4, TNFSF14, TNFSF15, EDA2R, TNFRSF8	0.0953872	0.407018	-0.661899	20	-1.74697
REACTOME_THE_CITRIC_ACID_TCA_CYCLE_AND_RESPIRATORY_ELECTRON_TRANSPORT	c2_cp_reactome	CART	C3	1.98268	7.66298e-08	GSTZ1, PDP2, TRAP1, TACO1, SCO2, MT-ATP8, NDUFAF1, FH, NDUFS2, ATP5F1B, LDHB, ME3, COA1, SLC16A3, UCP3, NDUFB3, NDUFB9, MT-CO3, SUCLG1, ETFB, UCP2, COX6C, NDUFB5, ATP5F1A, NDUFB1, COX7A2L, NDUFS3, MT-CO1, DLD, MT-ND3, IDH3B, ATP5MC3, ATP5PO, ATP5F1C, NDUFA7, MT-CO2, NDUFV2, PDHB, ATP5MF, NDUFS5, TIMMDC1, ATP5MG, ATP5F1E, FAHD1, PDHX, NDUFS6, VDAC1, MT-ND2, ECSIT, NDUFA2, ATP5MC2, NDUFAB1, NDUFA1,…	2.41894e-05	0.704976	0.505836	168	1.98268
REACTOME_THE_CITRIC_ACID_TCA_CYCLE_AND_RESPIRATORY_ELECTRON_TRANSPORT	c2_cp_reactome	CART	C5	1.57507	0.000160435	LDHC, UCP3, GSTZ1, NDUFA13, NDUFA7, NDUFB1, NDUFB3, OGDH, CYC1, ATP5F1B, NDUFS8, ETFB, NDUFV1, IDH2, MT-ATP8, ATP5F1E, ATP5MG, NDUFA1, PDPR, PPARD, NDUFS7, NDUFA9, IDH3B, COX7B, NDUFA3, NDUFS2, NDUFAF5, NDUFB7, UQCRC1, NDUFB8, NDUFS6, NDUFAF6, LDHB, NDUFB9, ATP5ME, COX5A, ATP5PF, COX6B1, PDK3, NDUFA11, NDUFS5, NDUFAF1, UQCRH, COX6C, ECSIT, ACAD9, COX6A1, ATP5F1A, ATP5MF, MDH2, SUCLA2, ATP5PD, DLA…	0.0101798	0.518848	0.354642	167	1.57507
REACTOME_THE_CITRIC_ACID_TCA_CYCLE_AND_RESPIRATORY_ELECTRON_TRANSPORT	c2_cp_reactome	CART	C1	1.52855	0.00027311	GSTZ1, SLC16A3, ME3, NDUFA7, NDUFS2, TRAP1, FH, MT-ATP8, SLC25A14, NDUFS4, NDUFB3, TMEM186, NDUFB5, ATP5F1B, DLD, ECSIT, TACO1, PDHX, SDHC, ETFB, COX16, COA1, ACAD9, ATP5PB, NDUFV2, NDUFAF1, NDUFB1, UQCRC2, NDUFB9, CYC1, ATP5F1C, NDUFAF6, COX7A2L, PPARD, UCP2, ATP5F1A, PDPR, PDK2, SURF1, NDUFA13, SUCLA2, SUCLG1, SDHB, ATP5MF, COQ10B, IDH3B, LDHB, ATP5ME, PDHB, NDUFA9, ATP5PO, DLAT, NDUFAF3, NDUFA…	0.0566327	0.498493	0.371022	168	1.52855
REACTOME_SYNTHESIS_OF_EPOXY_EET_AND_DIHYDROXYEICOSATRIENOIC_ACIDS_DHET	c2_cp_reactome	CARneg	C4	1.58834	0.00210978	CYP2J2, CYP1B1, CYP1A1	0.0839167	0.431708	-0.941586	4	-1.58834
REACTOME_SWITCHING_OF_ORIGINS_TO_A_POST_REPLICATIVE_STATE	c2_cp_reactome	CART	C3	1.74106	0.000314213	CDT1, MCM2, UBE2C, MCM5, MCM4, MCM7, MCM3, CDC6, PSMD3, MCM6, PSMA2, CCNE1, ANAPC15, CDC16, SEM1, PSMA8, PSMA1, ORC1, PSMA3, PSMD10, PSMB4, SKP2, PSMB7, PSMC1, PSMA4, PSMD13, CDK2, RBX1, ORC6, PSMD2, PSMB8, ANAPC2, PSMB1, PSMB10, PSMB2, PSMC5, PSMD4, PSMB5, CDC26, PSMA5, PSMB3, PSMD1, PSMD11, PSMC4	0.010854	0.498493	0.483043	89	1.74106
REACTOME_SWITCHING_OF_ORIGINS_TO_A_POST_REPLICATIVE_STATE	c2_cp_reactome	CART	C1	1.72444	0.000285124	CDT1, CDC6, UBE2C, MCM5, MCM2, CCNE1, PSMA2, MCM3, MCM7, ANAPC2, PSMB10, MCM4, PSMC2, MCM6, ORC1, PSMA3, PSMA4, PSMB7, PSMD13, CDK2, PSMA1, PSMC1, PSMD9, PSMD4, SEM1, CDC26, ANAPC15, FZR1, PSMB4, PSMD3, RBX1, PSMD5, PSMD6, PSMB1, PSMD10, PSMC4, PSMB3, PSMC3, PSMC6, PSMB5, PSMA5, SKP2	0.0566327	0.498493	0.446856	89	1.72444
REACTOME_SWITCHING_OF_ORIGINS_TO_A_POST_REPLICATIVE_STATE	c2_cp_reactome	CART	C5	1.69269	0.000362761	CDT1, MCM5, CDK2, MCM2, CDC6, MCM7, MCM4, MCM3, MCM8, PSMB7, SEM1, PSMB10, ANAPC11, PSMC1, UBE2E1, UBE2C, ANAPC4, FZR1, PSMD4, PSMC3, PSMD3, PSMB4, PSMB8, PSMD1, PSMD7, ANAPC16, CDC23, PSMC4, PSMA4, ANAPC15, PSMA1, ORC3, CCNE1, UBA52, PSMA2, CCNE2, ORC6, PSMD10, PSMD2, ANAPC1, PSMB1	0.0164175	0.498493	0.40742	89	1.69269
REACTOME_STABILIZATION_OF_P53	c2_cp_reactome	CART	C3	1.6823	0.0041187	TP53, PSMD3, PSMA2, SEM1, PSMA8, CDKN2A, PSMA1, PSMA3, PSMD10, PSMB4, PSMB7, PSMC1, PSMA4, PSMD13, ATM, PSMD2, PSMB8, PSMB1, PSMB10, PSMB2, PSMC5, PSMD4, PSMB5, PSMA5, PSMB3, PSMD1, PSMD11, PSMC4, PSMD8, PSMD14, COP1, PSMD7, PSMC2	0.073535	0.407018	0.501577	56	1.6823
[truncated: 3,276 more rows]
